# Supplementary material for: Living Wall Plants Are Affected by and Affect Temperature: How to (Not) Measure Plants’ Temperature in an Living Wall Experiment
Source: Preprints.org preprint supplement (doi:10.20944/preprints202306.0856.v1), 2023-06-12
Supplement: Supplementary file 2 [file supplementary]

Plant: *Achillea ptarmica*, Exposition: South, DOY: 328

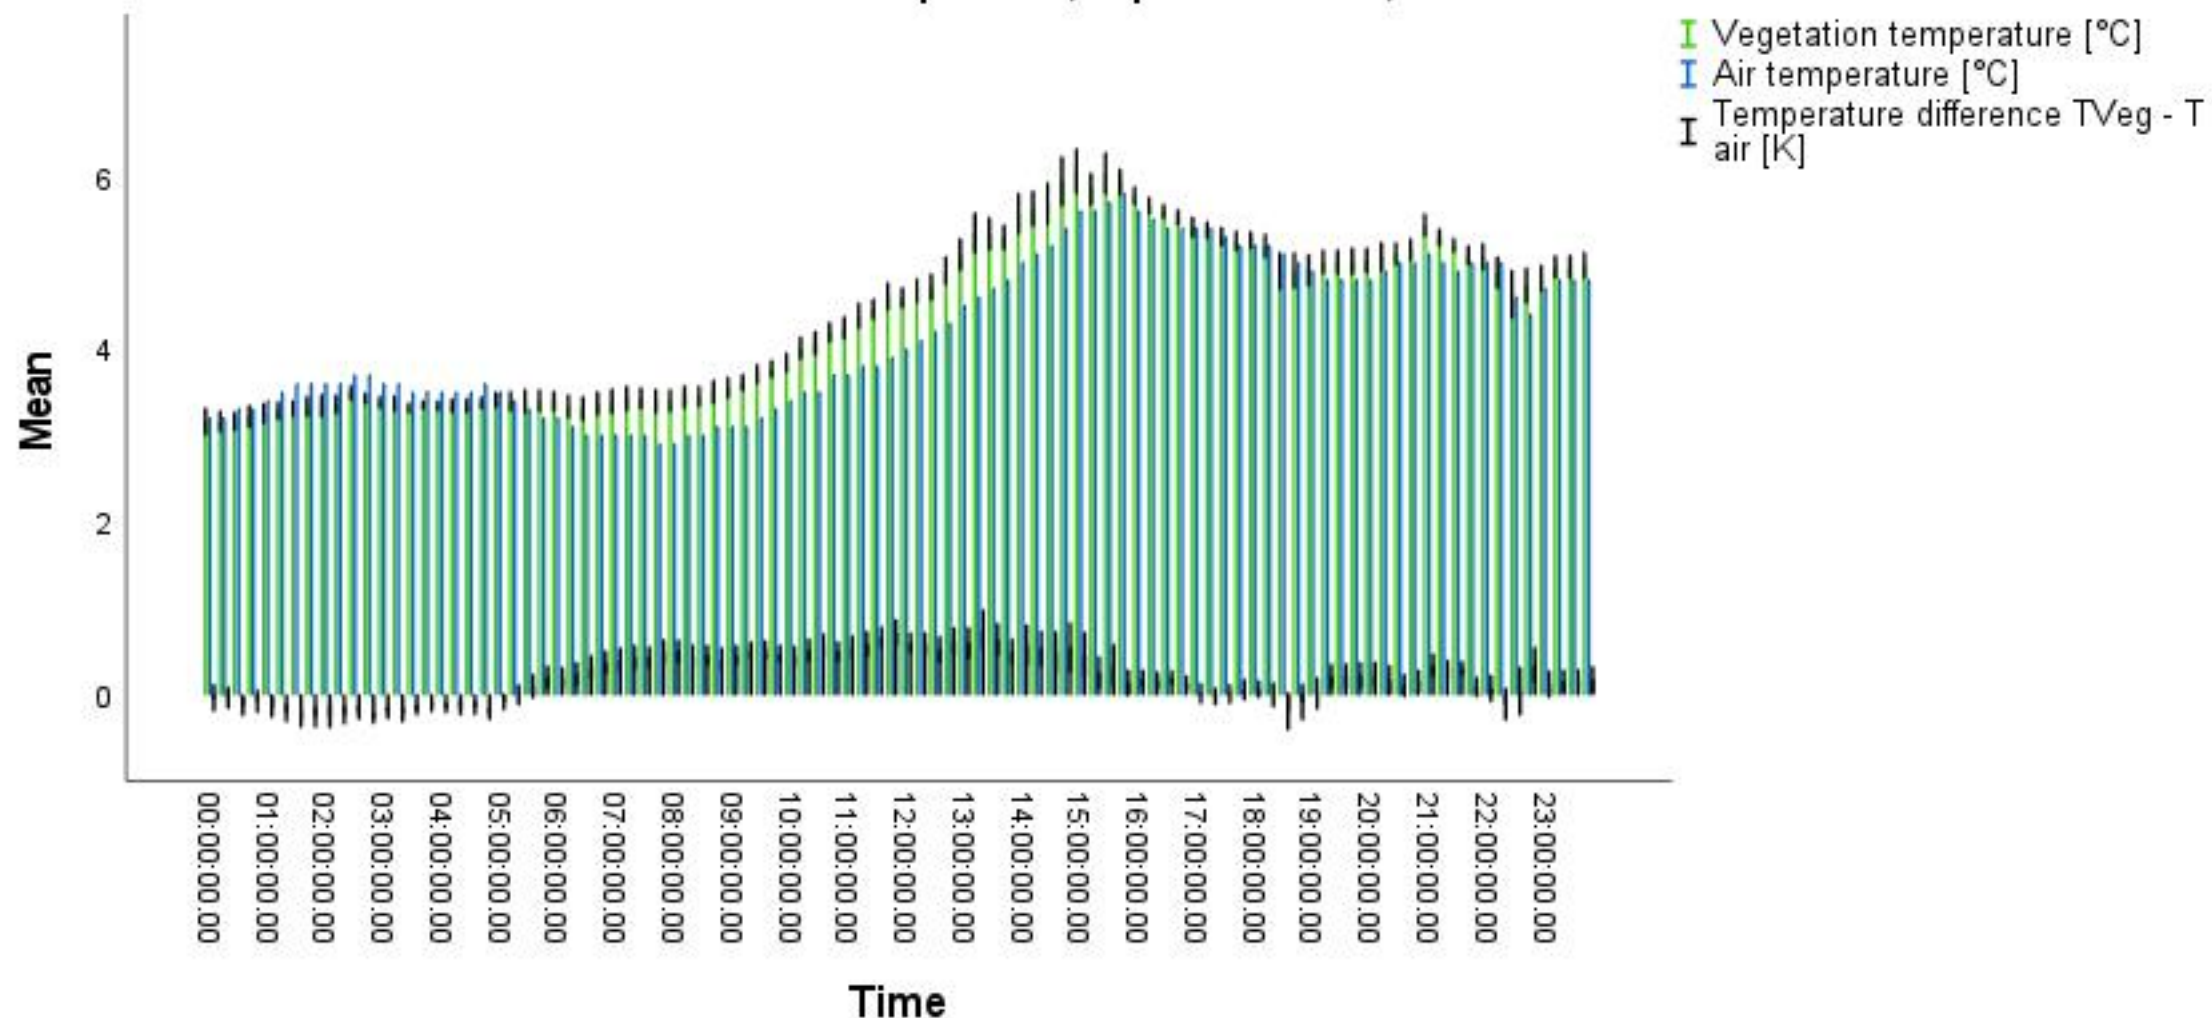

Plant: *Achillea ptarmica*, Exposition: South, DOY: 329

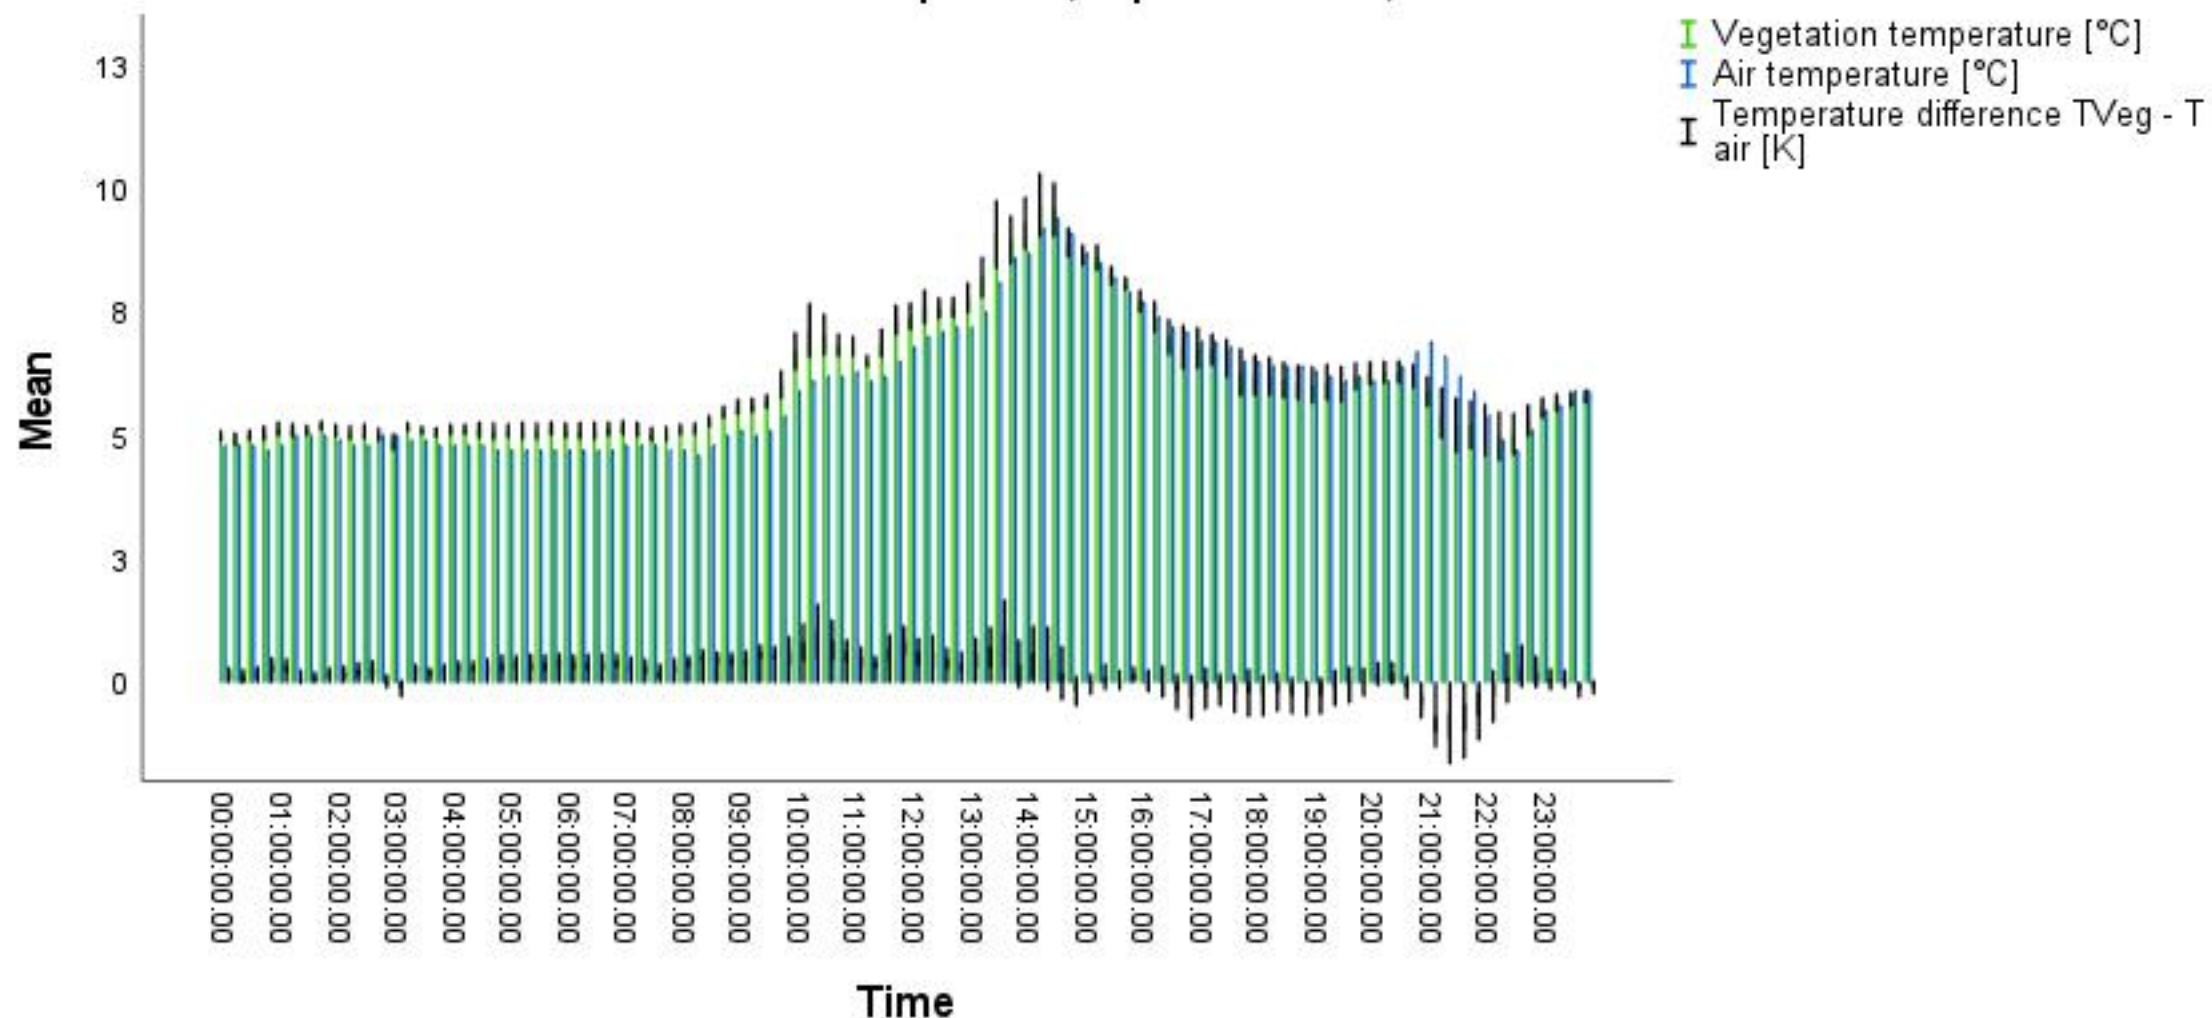

Fehlerbalken: 95% CI

Fehlerbalken: +/- 1 SD

Plant: *Ajuga tenorii* 'Mauro', Exposition: South, DOY: 310

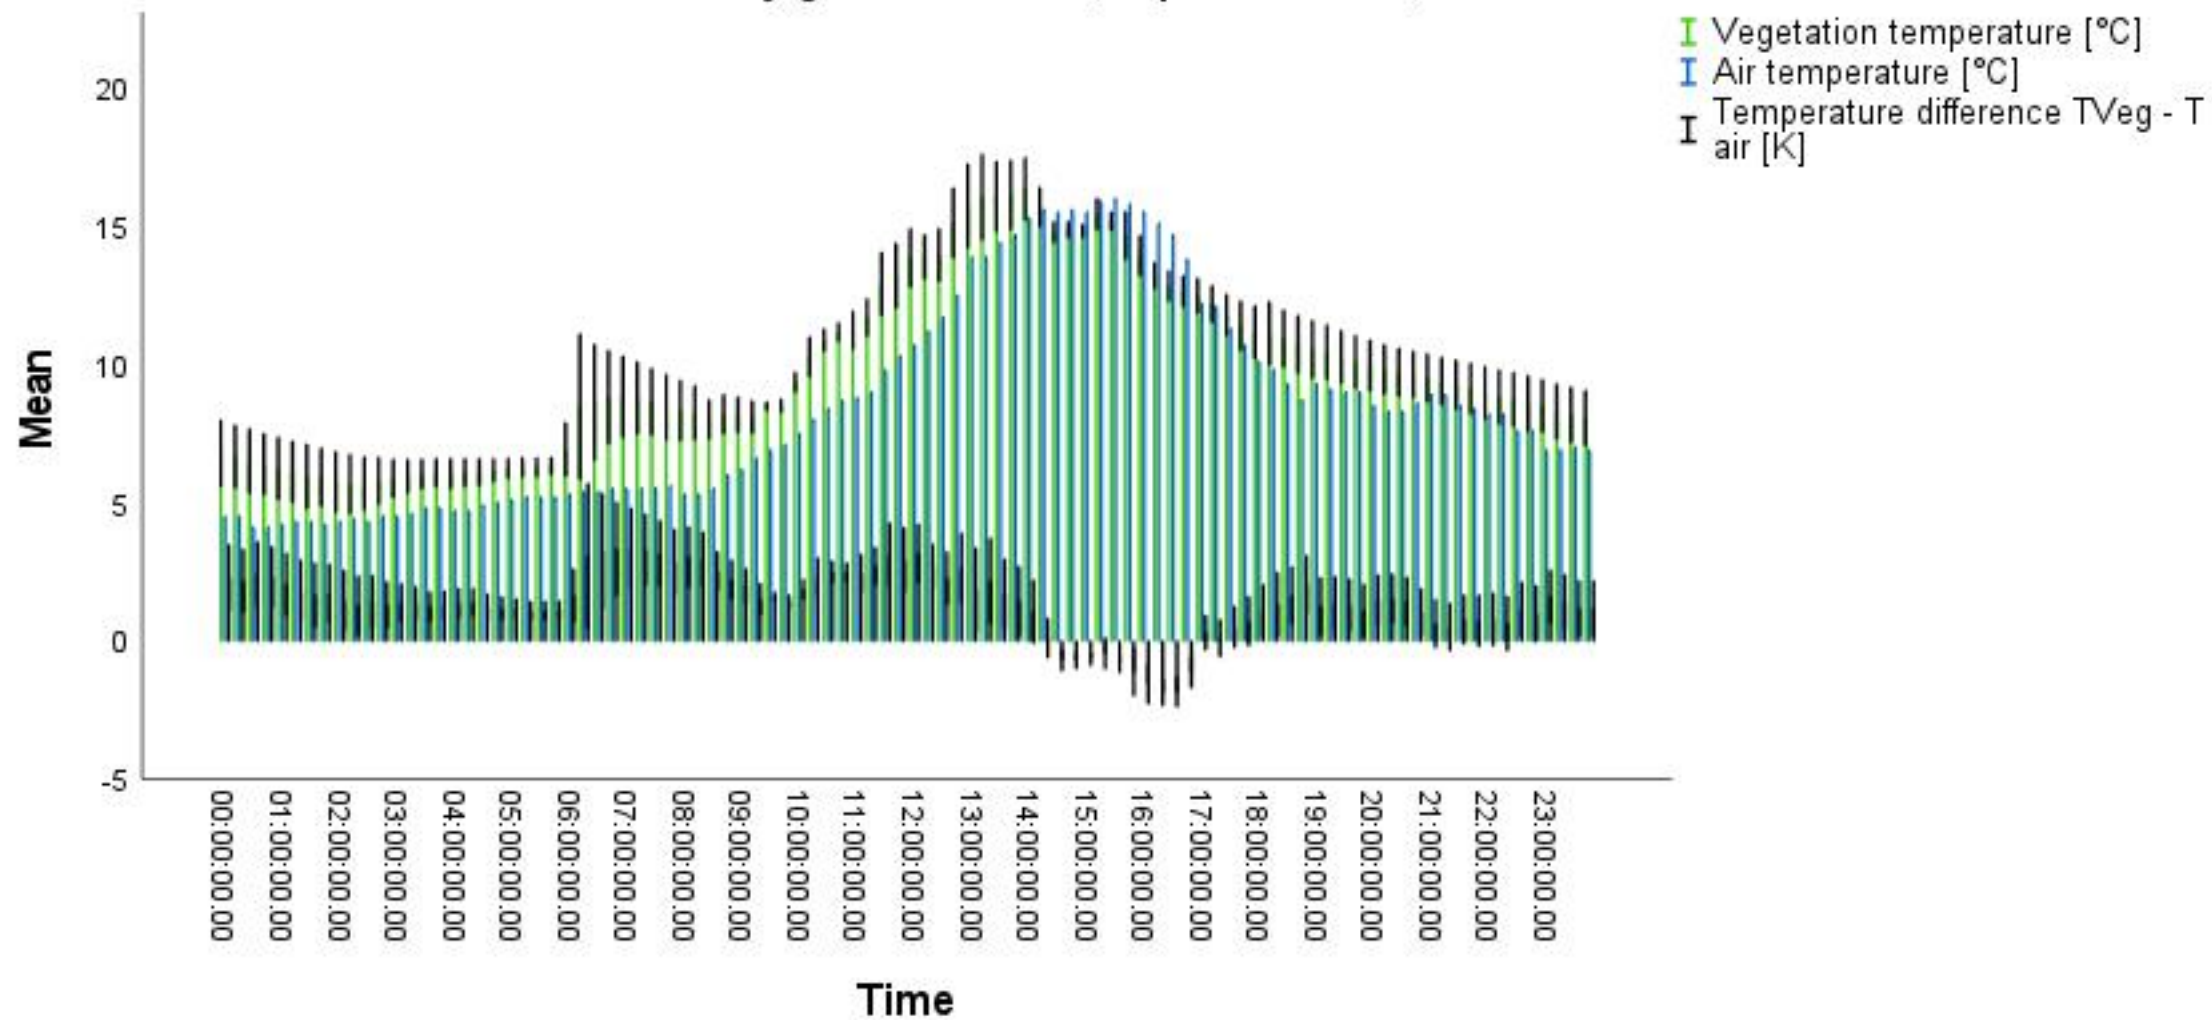

Plant: *Ajuga tenorii* 'Mauro', Exposition: South, DOY: 311

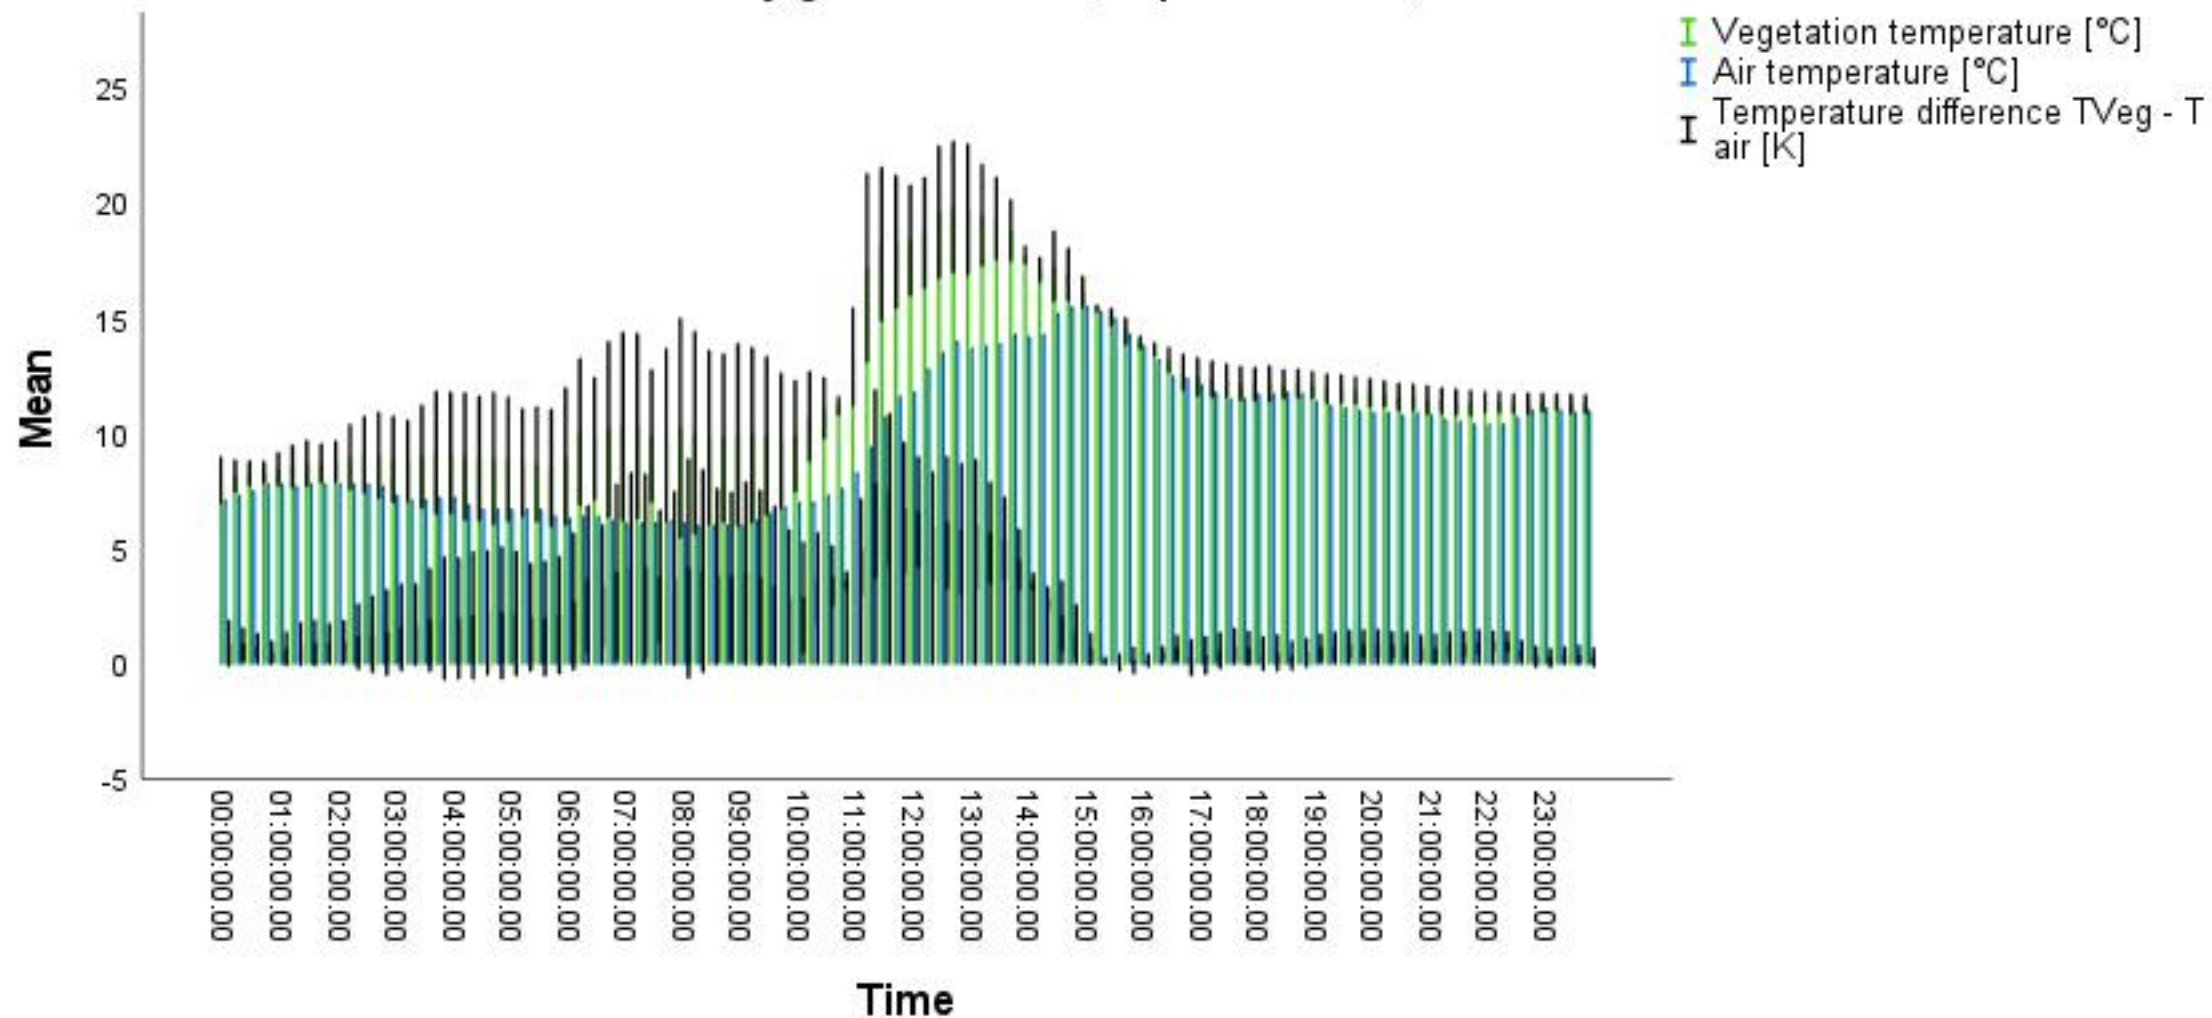

Fehlerbalken: 95% CI

Fehlerbalken: +/- 1 SD

Plant: *Alchemilla caucasica*, Exposition: South, DOY: 318

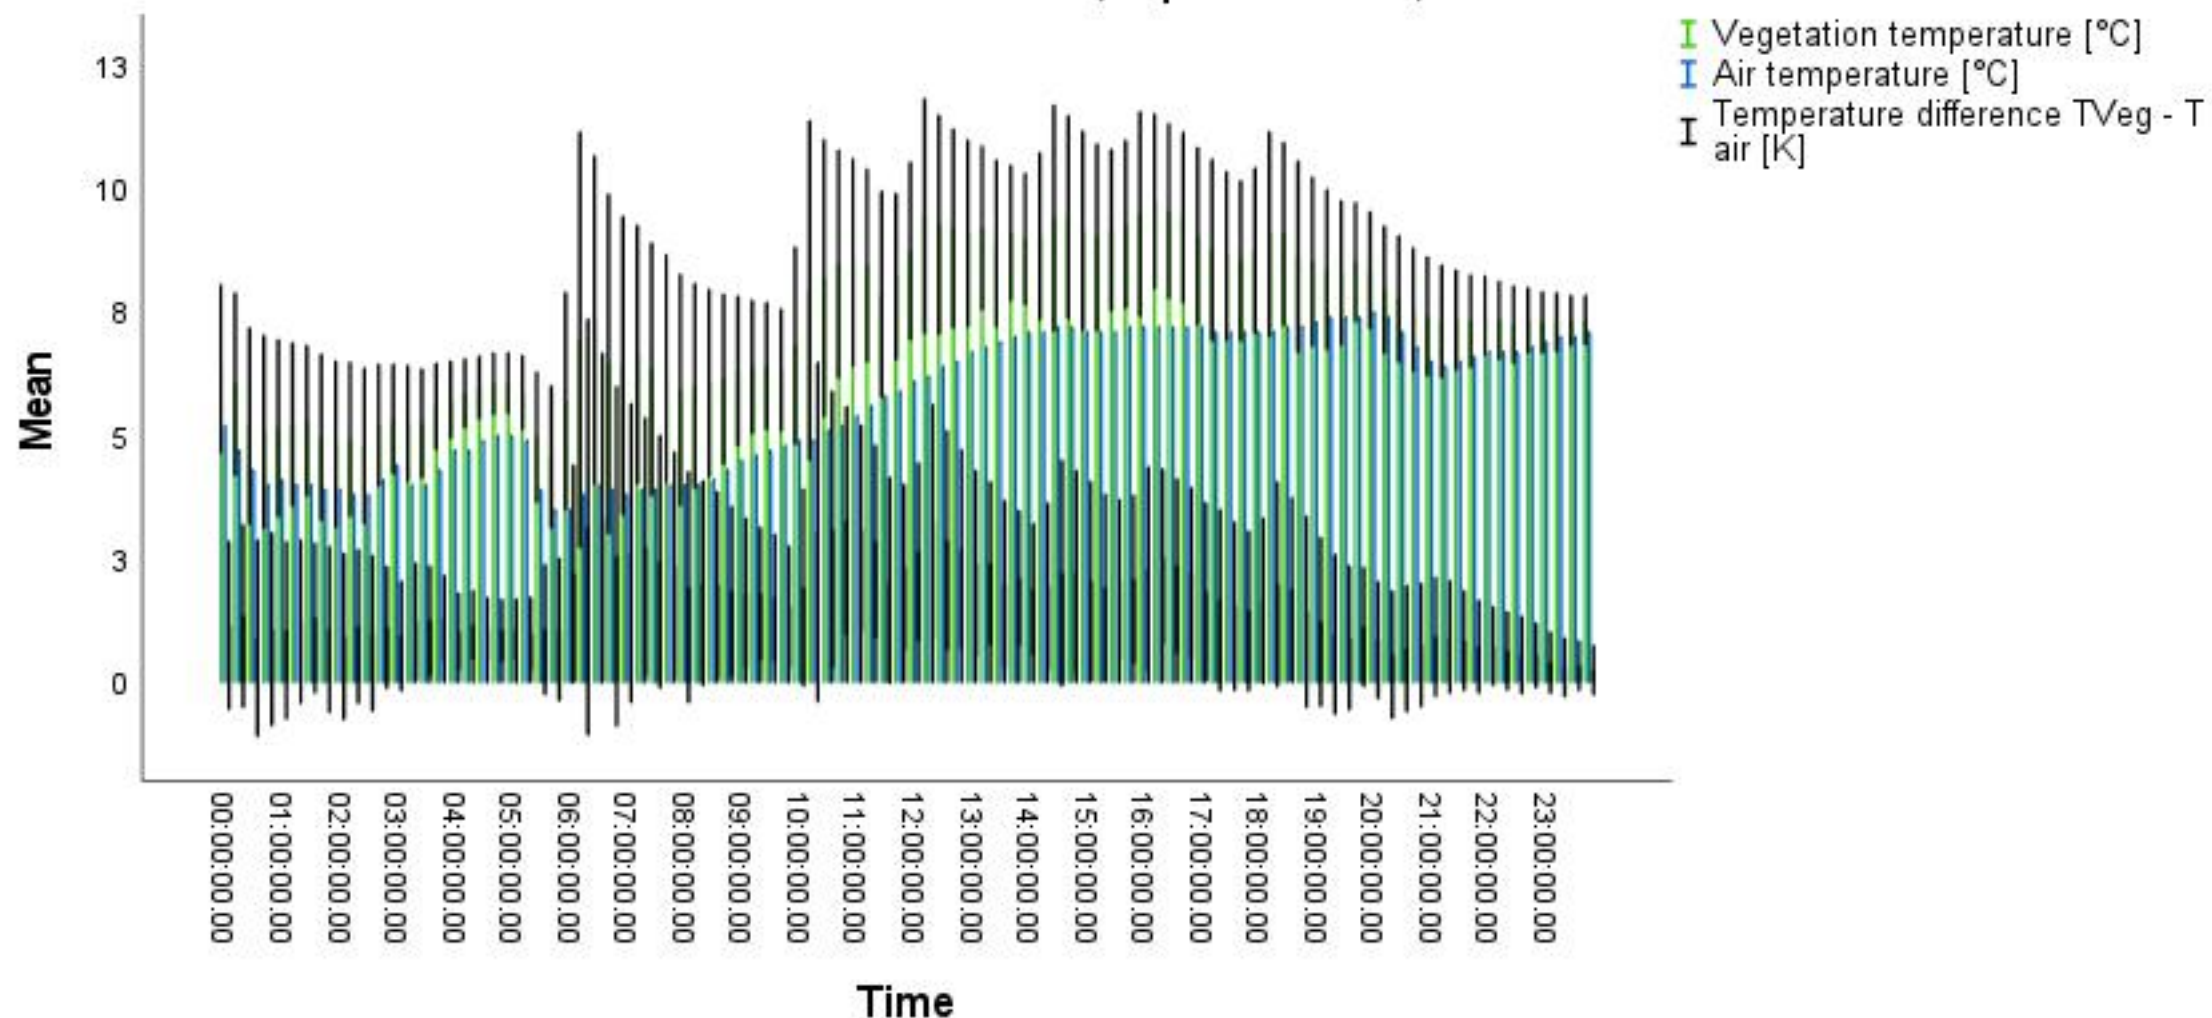

Fehlerbalken: 95% CI

Fehlerbalken:  $\pm 1$  SD



Plant: *Alchemilla caucasica*, Exposition: South, DOY: 319

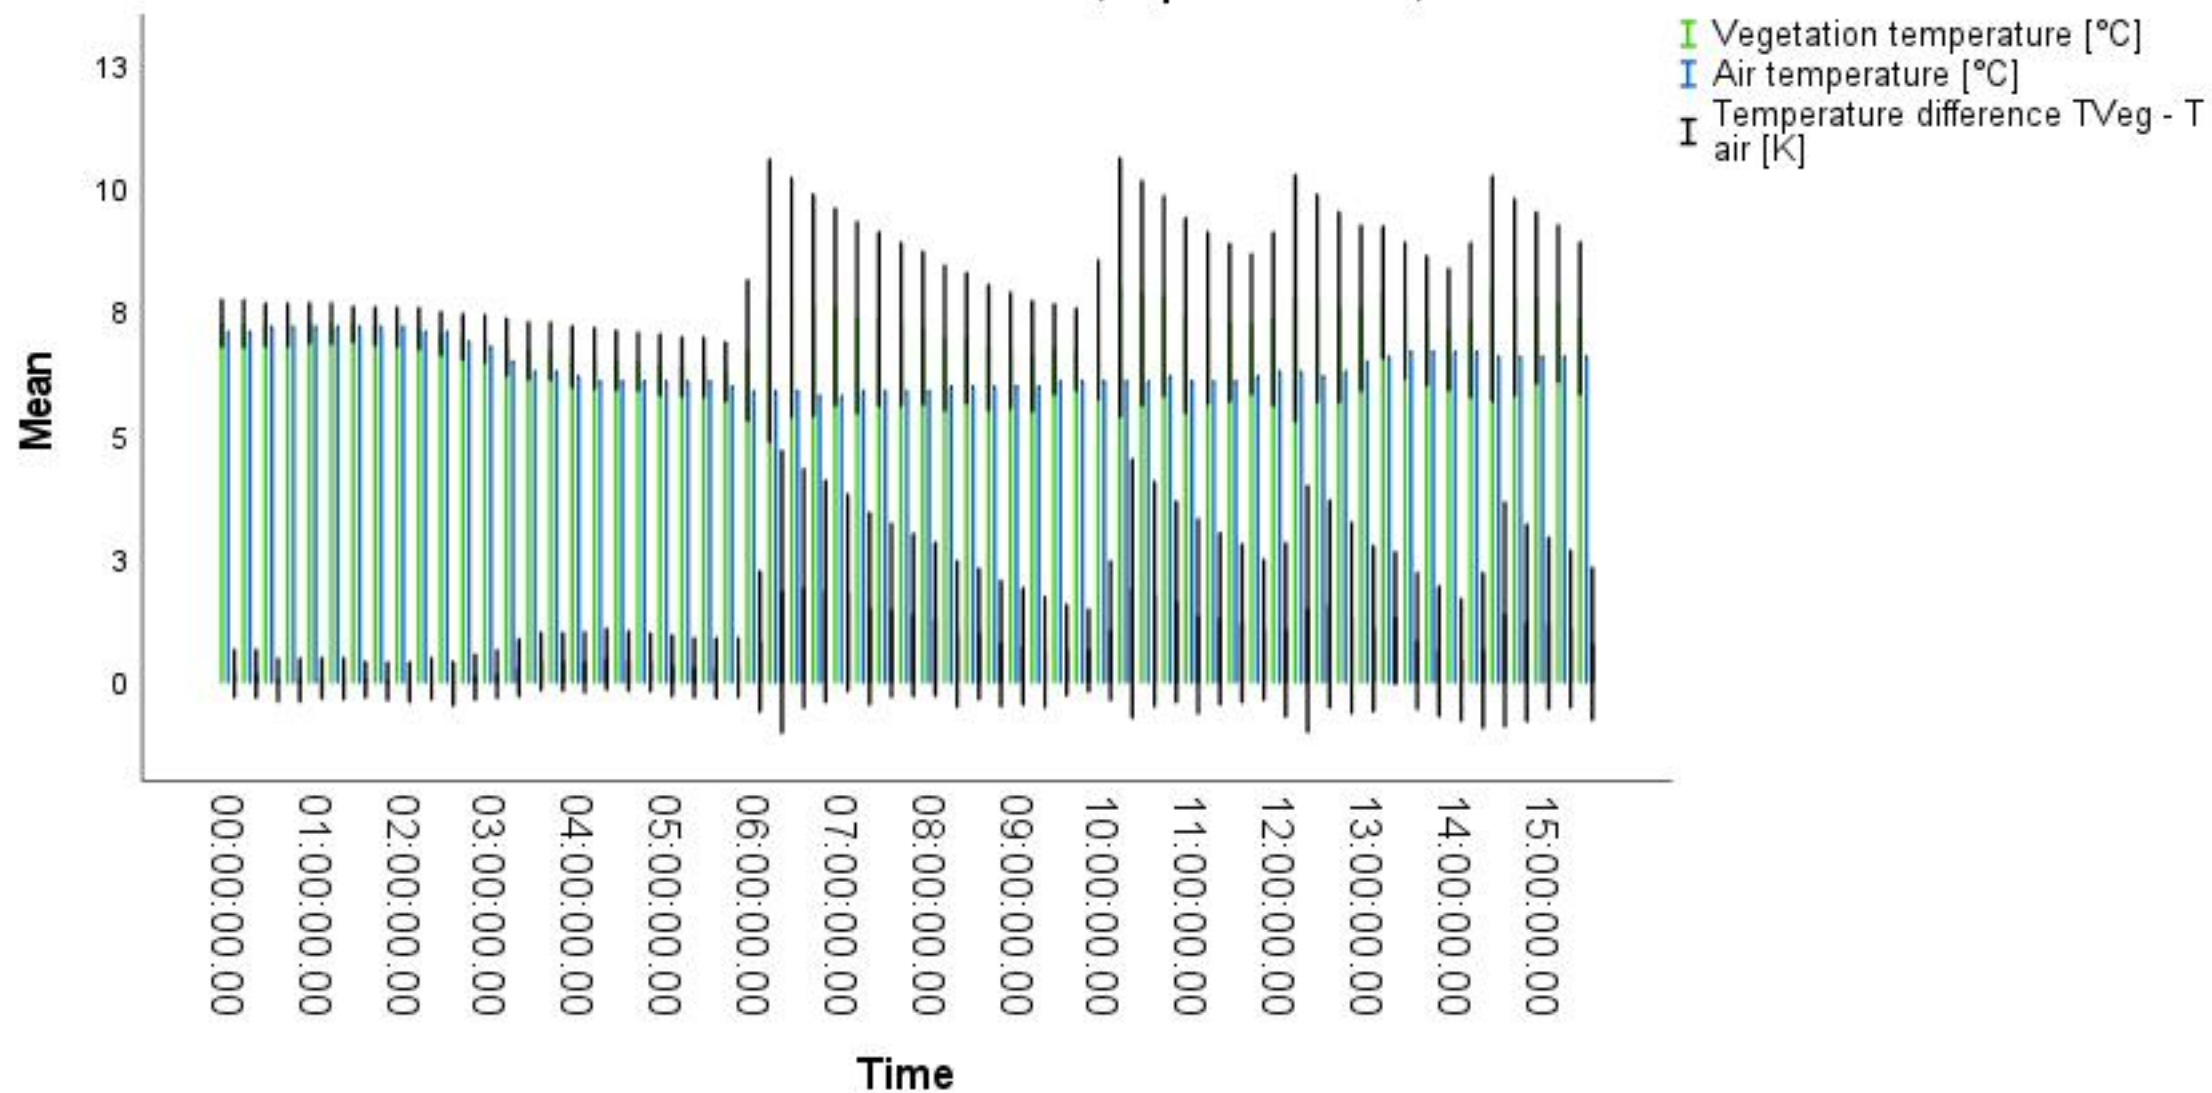

Fehlerbalken: 95% CI

Fehlerbalken: +/- 1 SD

Plant: *Asplenium scolopendrium*, Exposition: East, DOY: 328

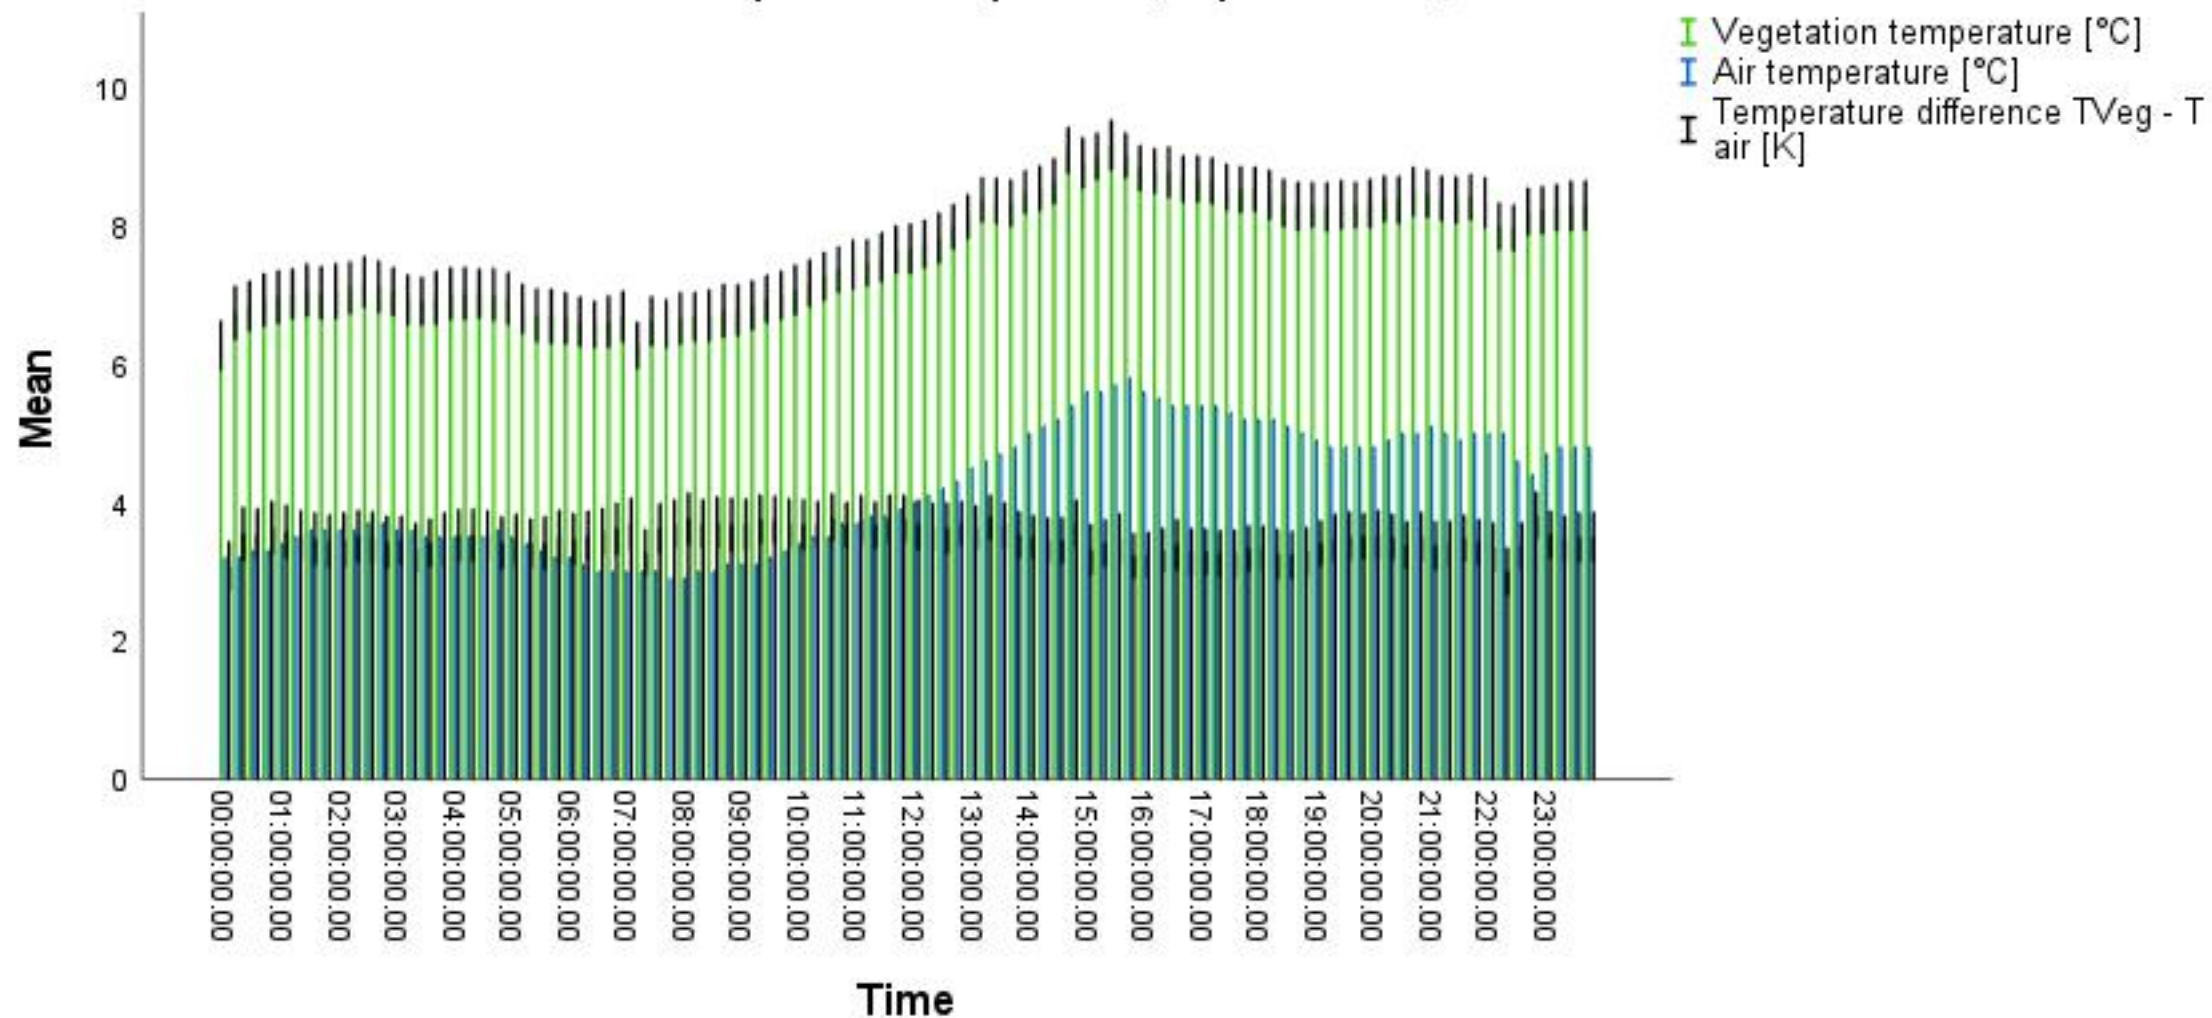

Fehlerbalken: 95% CI

Fehlerbalken:  $\pm 1$  SD

Plant: *Asplenium scolopendrium*, Exposition: East, DOY: 329

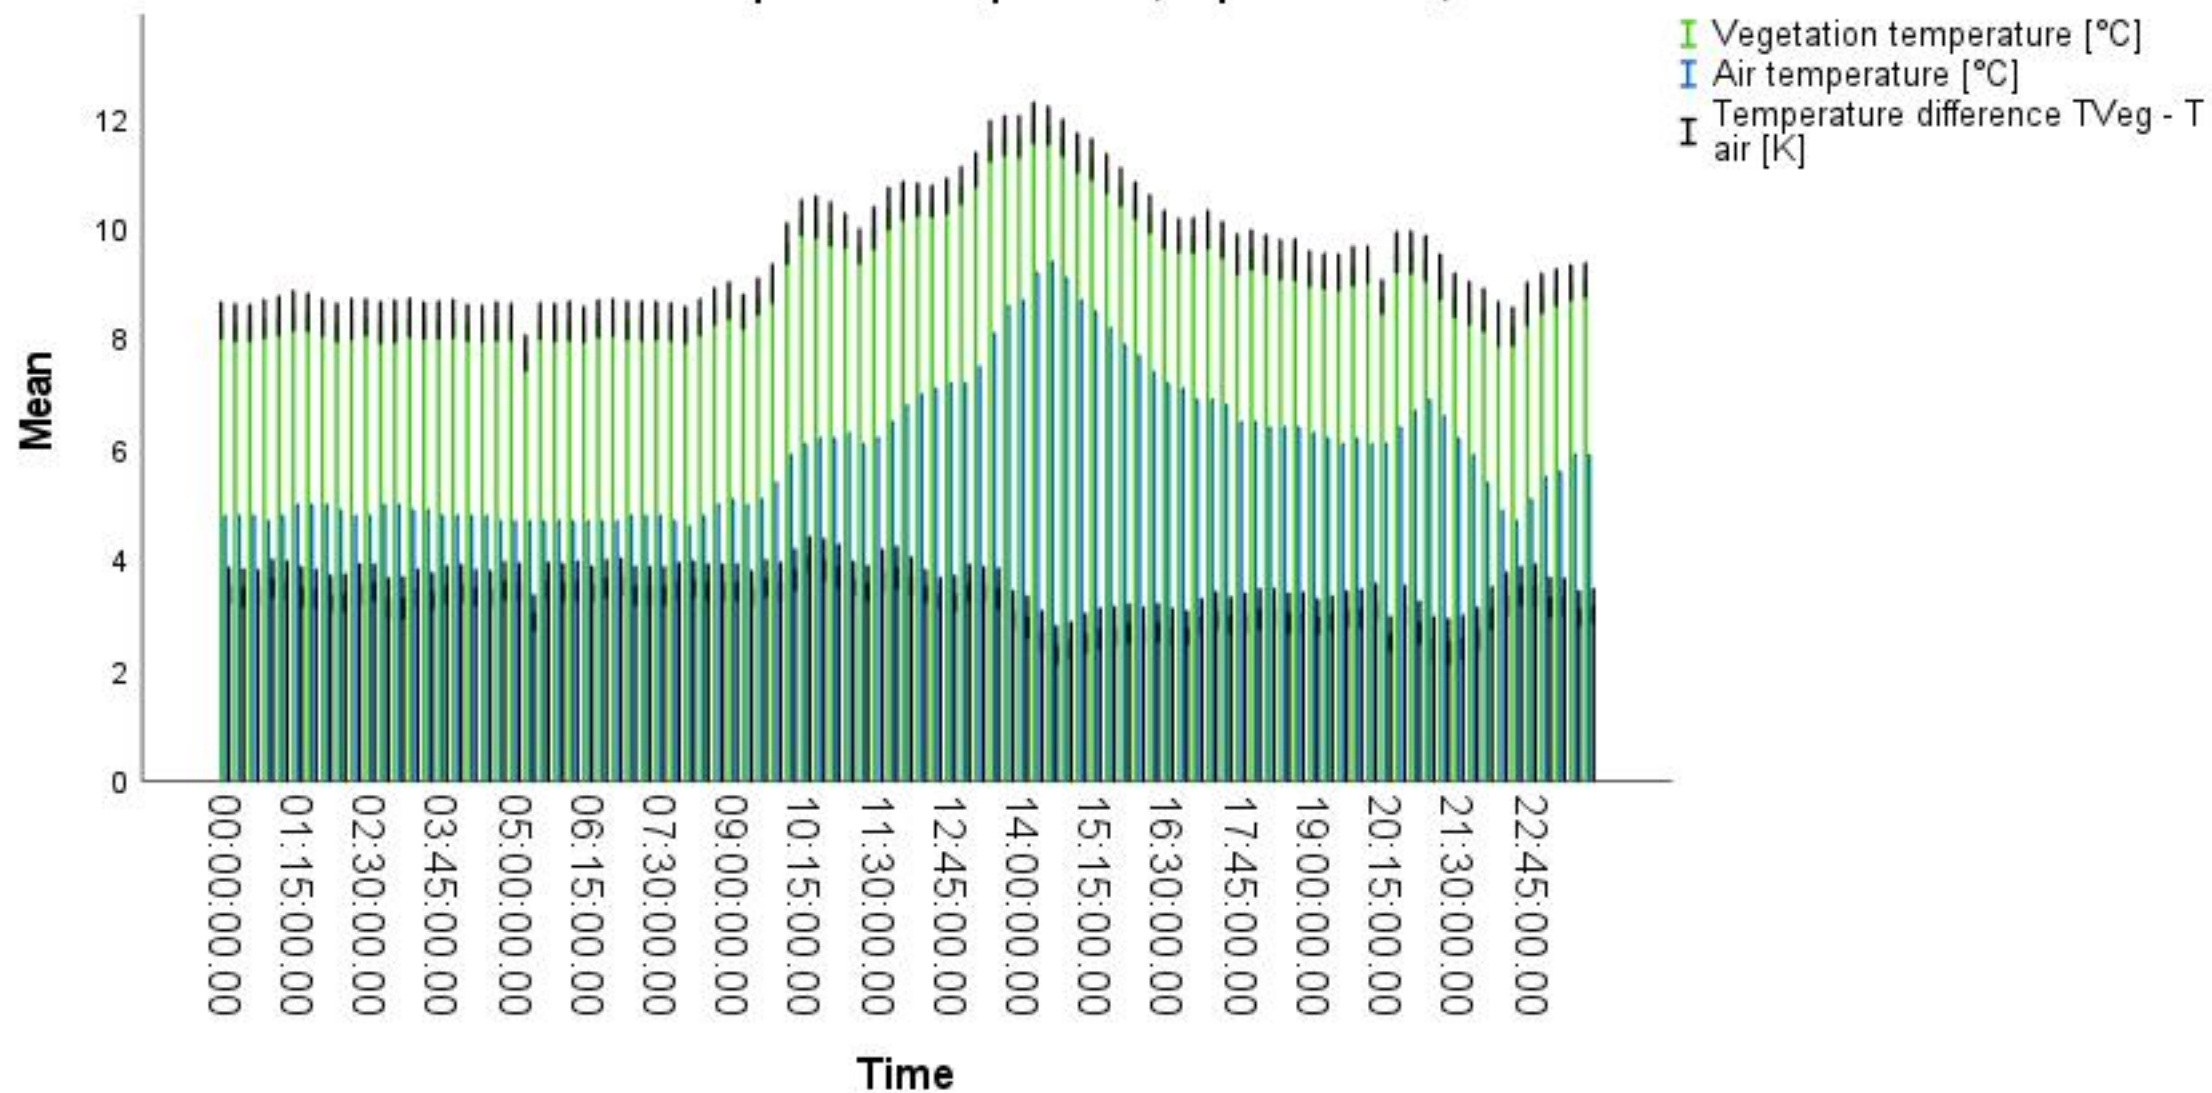



Plant: *Asplenium scolopendrium*, Exposition: North, DOY: 328

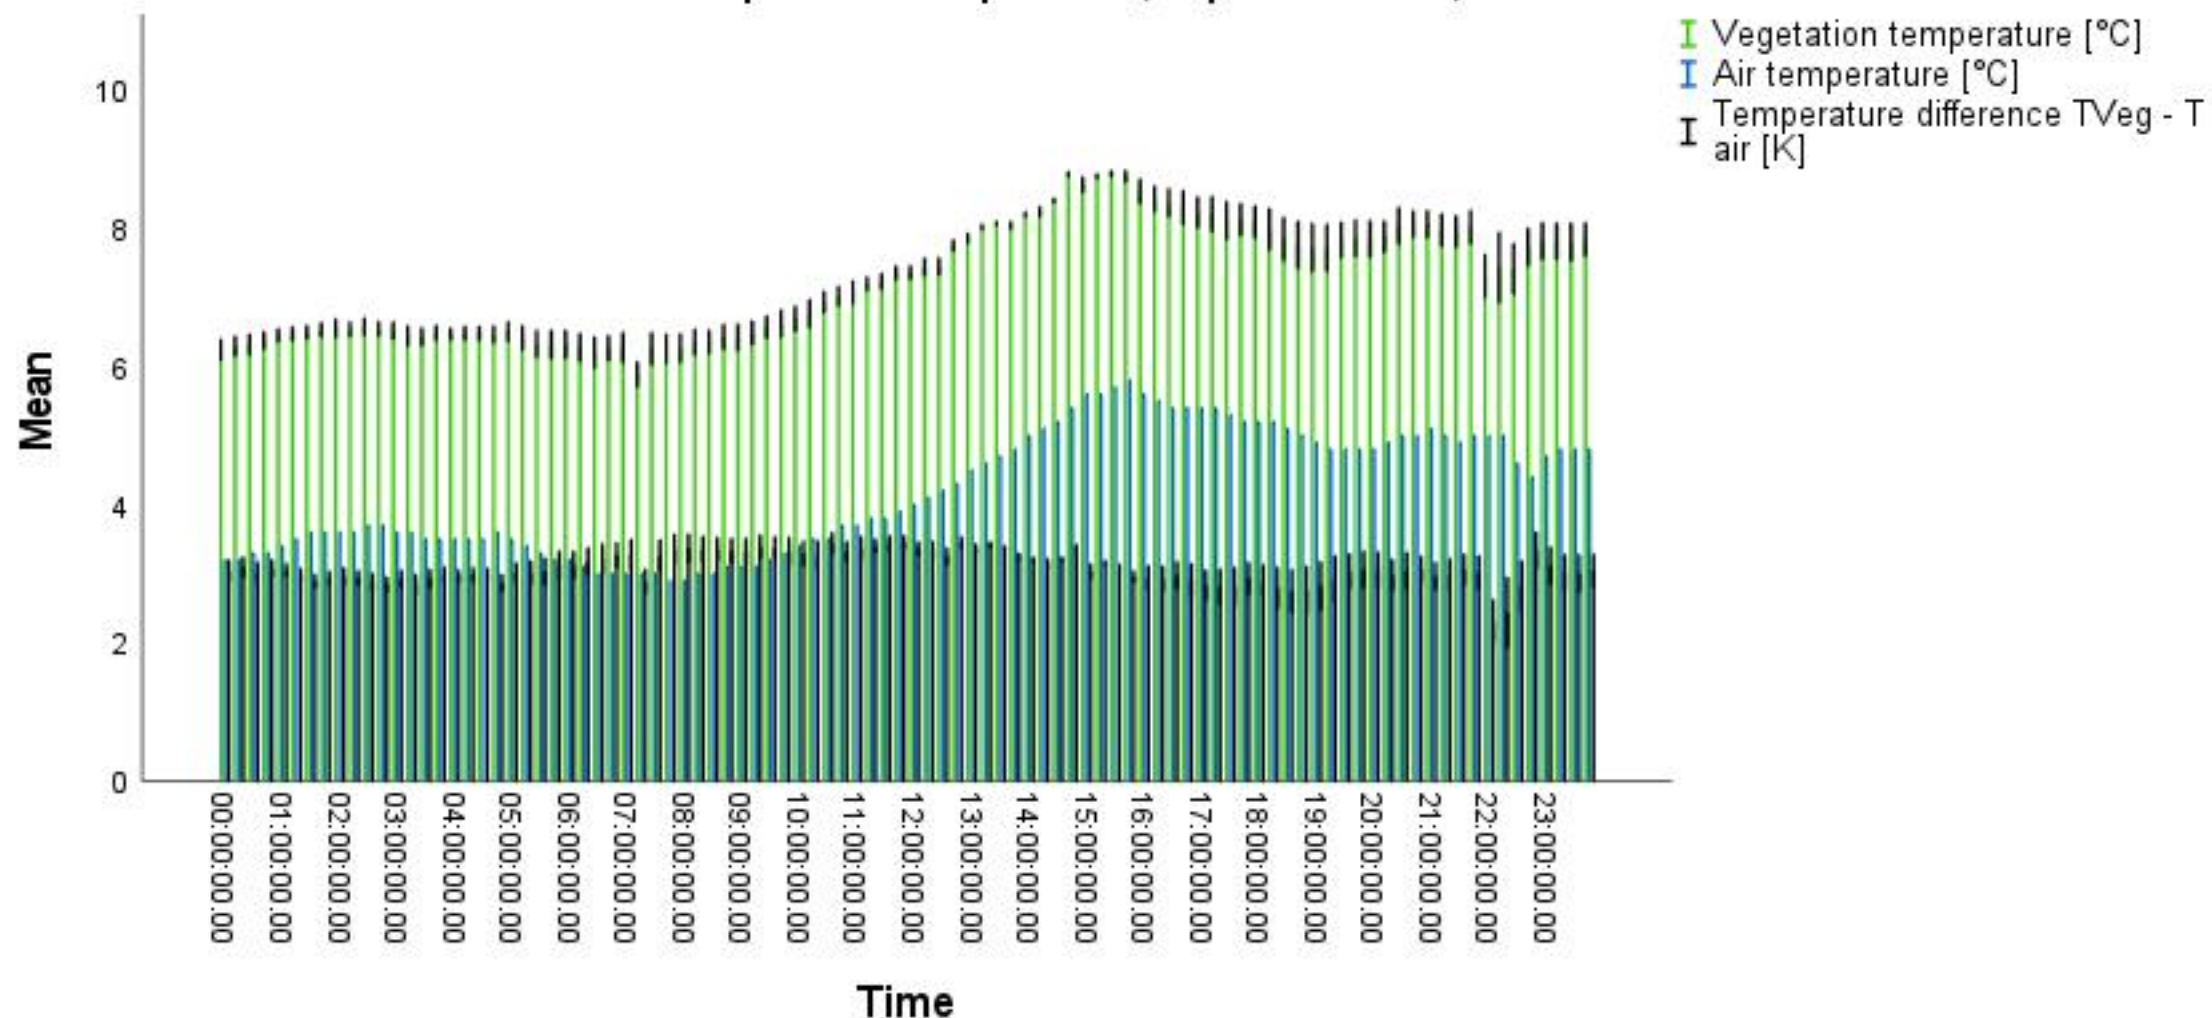

Fehlerbalken: 95% CI

Fehlerbalken: +/- 1 SD

Plant: *Asplenium scolopendrium*, Exposition: North, DOY: 329

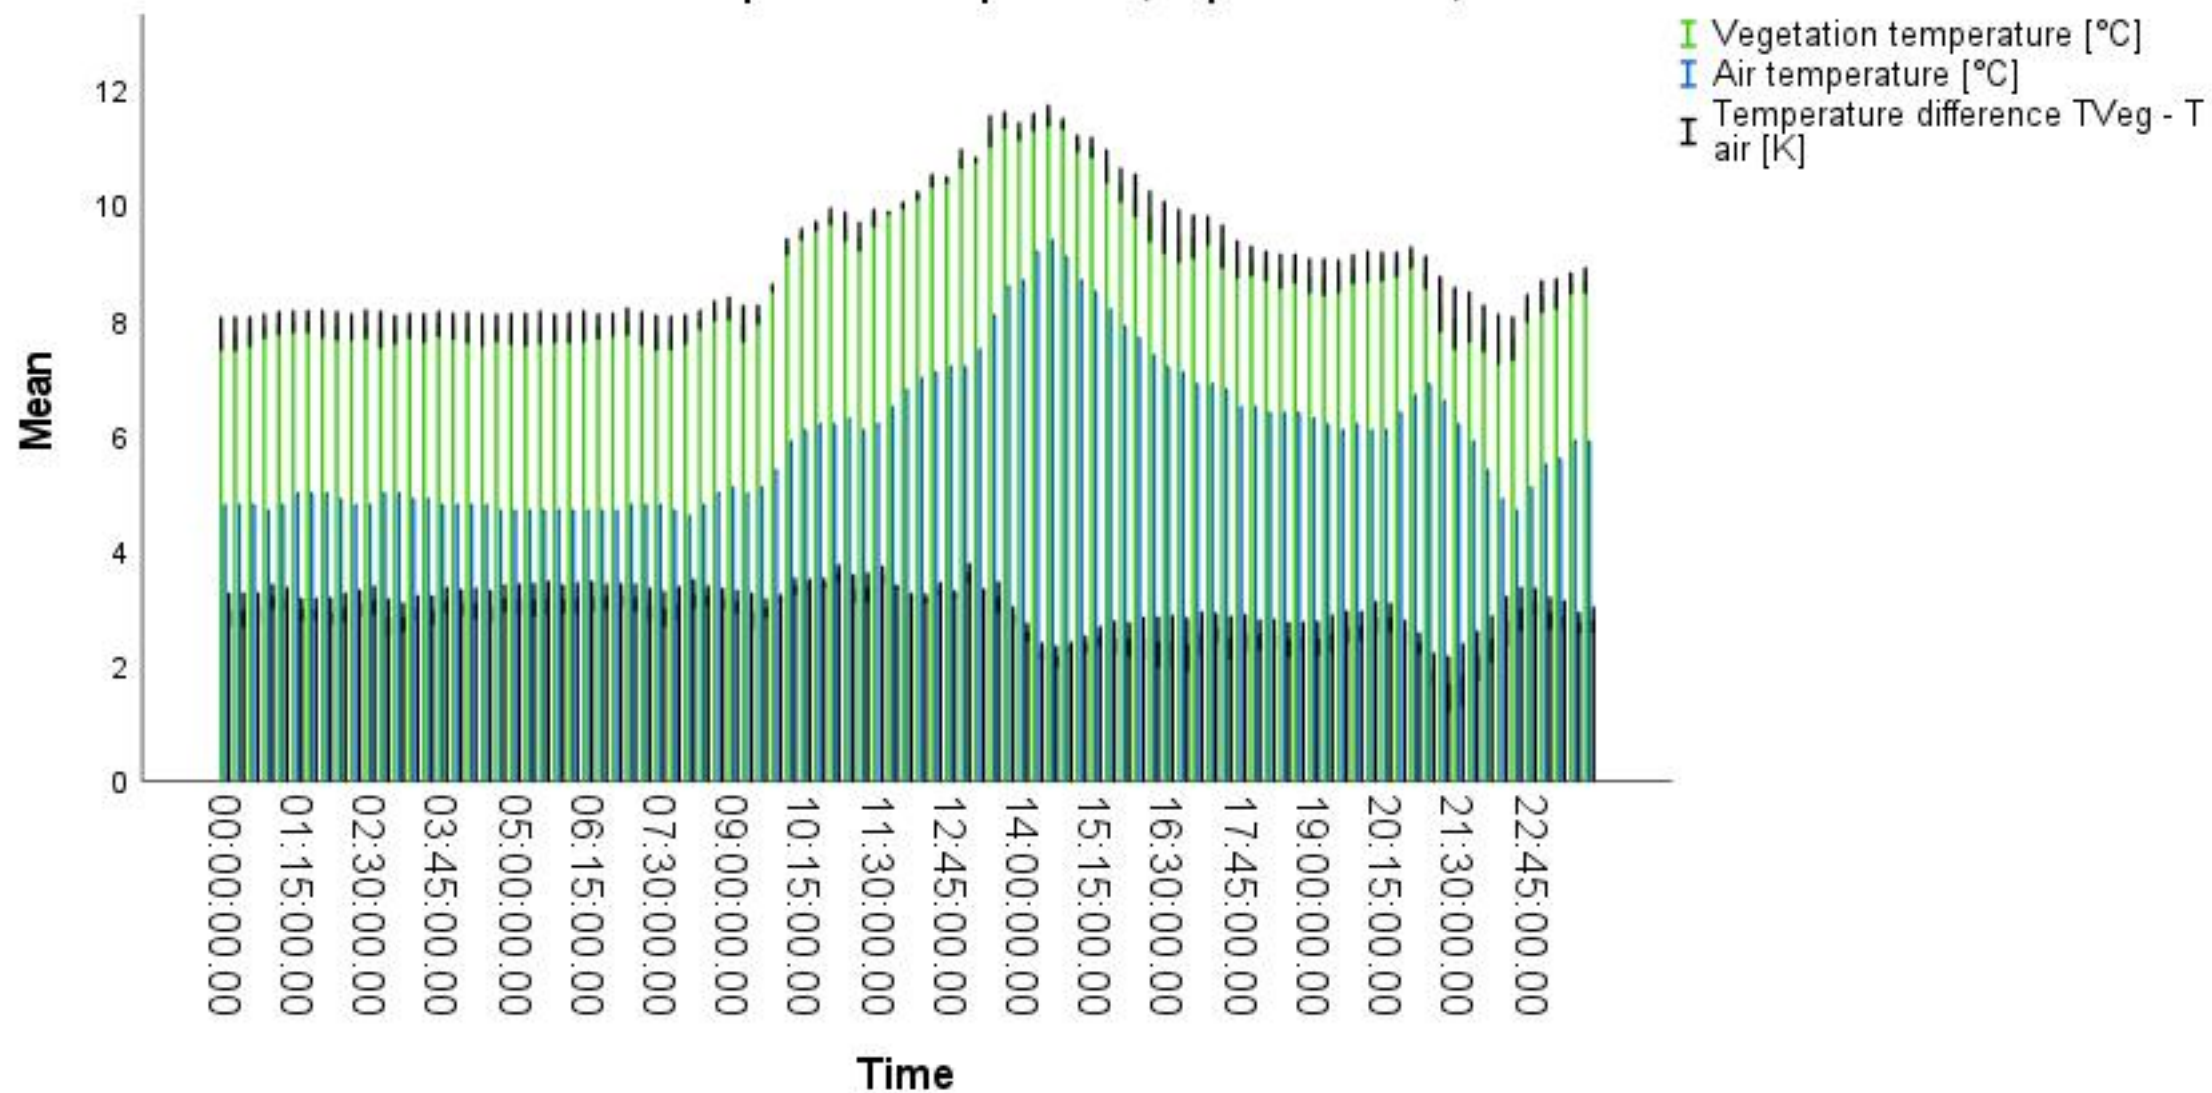

Plant: *Asplenium scolopendrium*, Exposition: South, DOY: 6

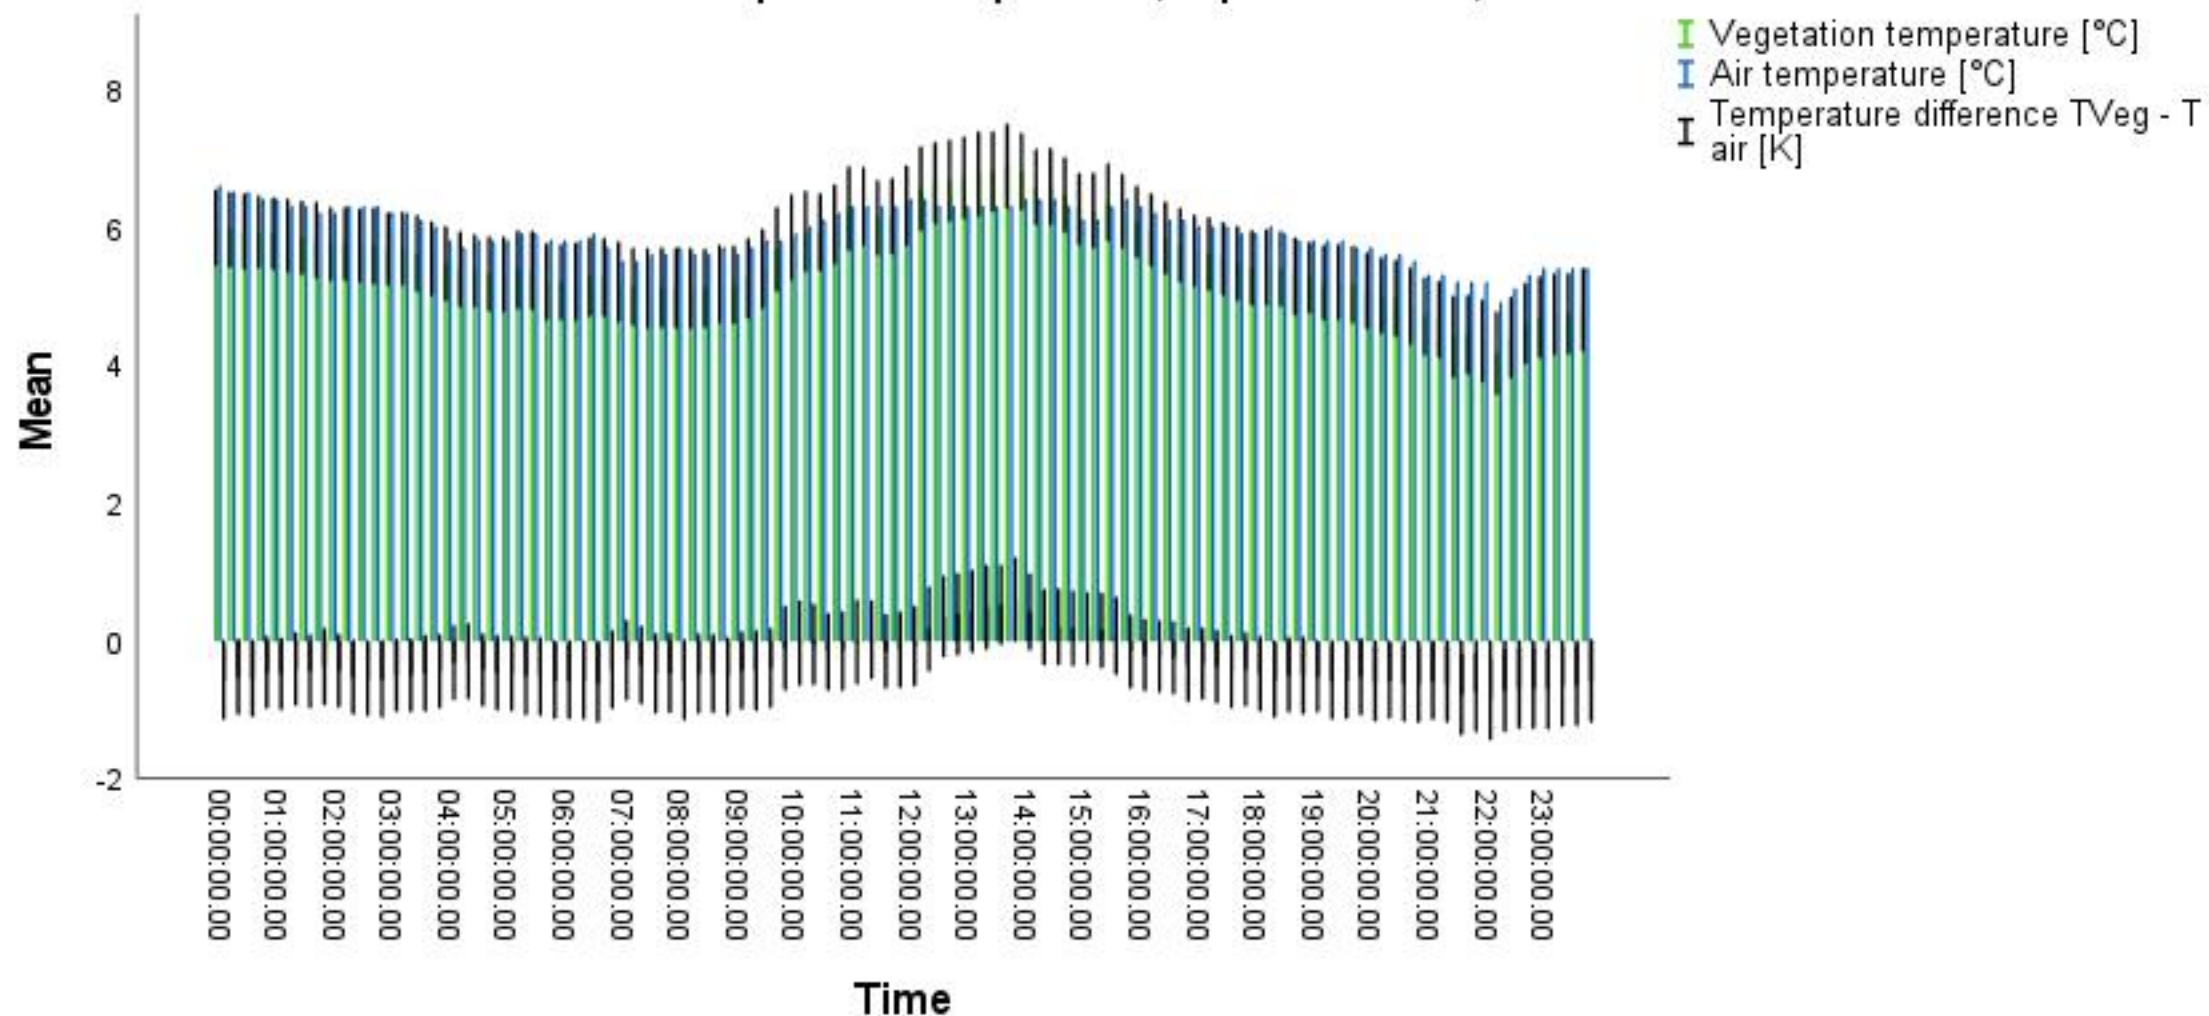

Fehlerbalken: 95% CI

Fehlerbalken: +/- 1 SD

Plant: *Asplenium scolopendrium*, Exposition: South, DOY: 7

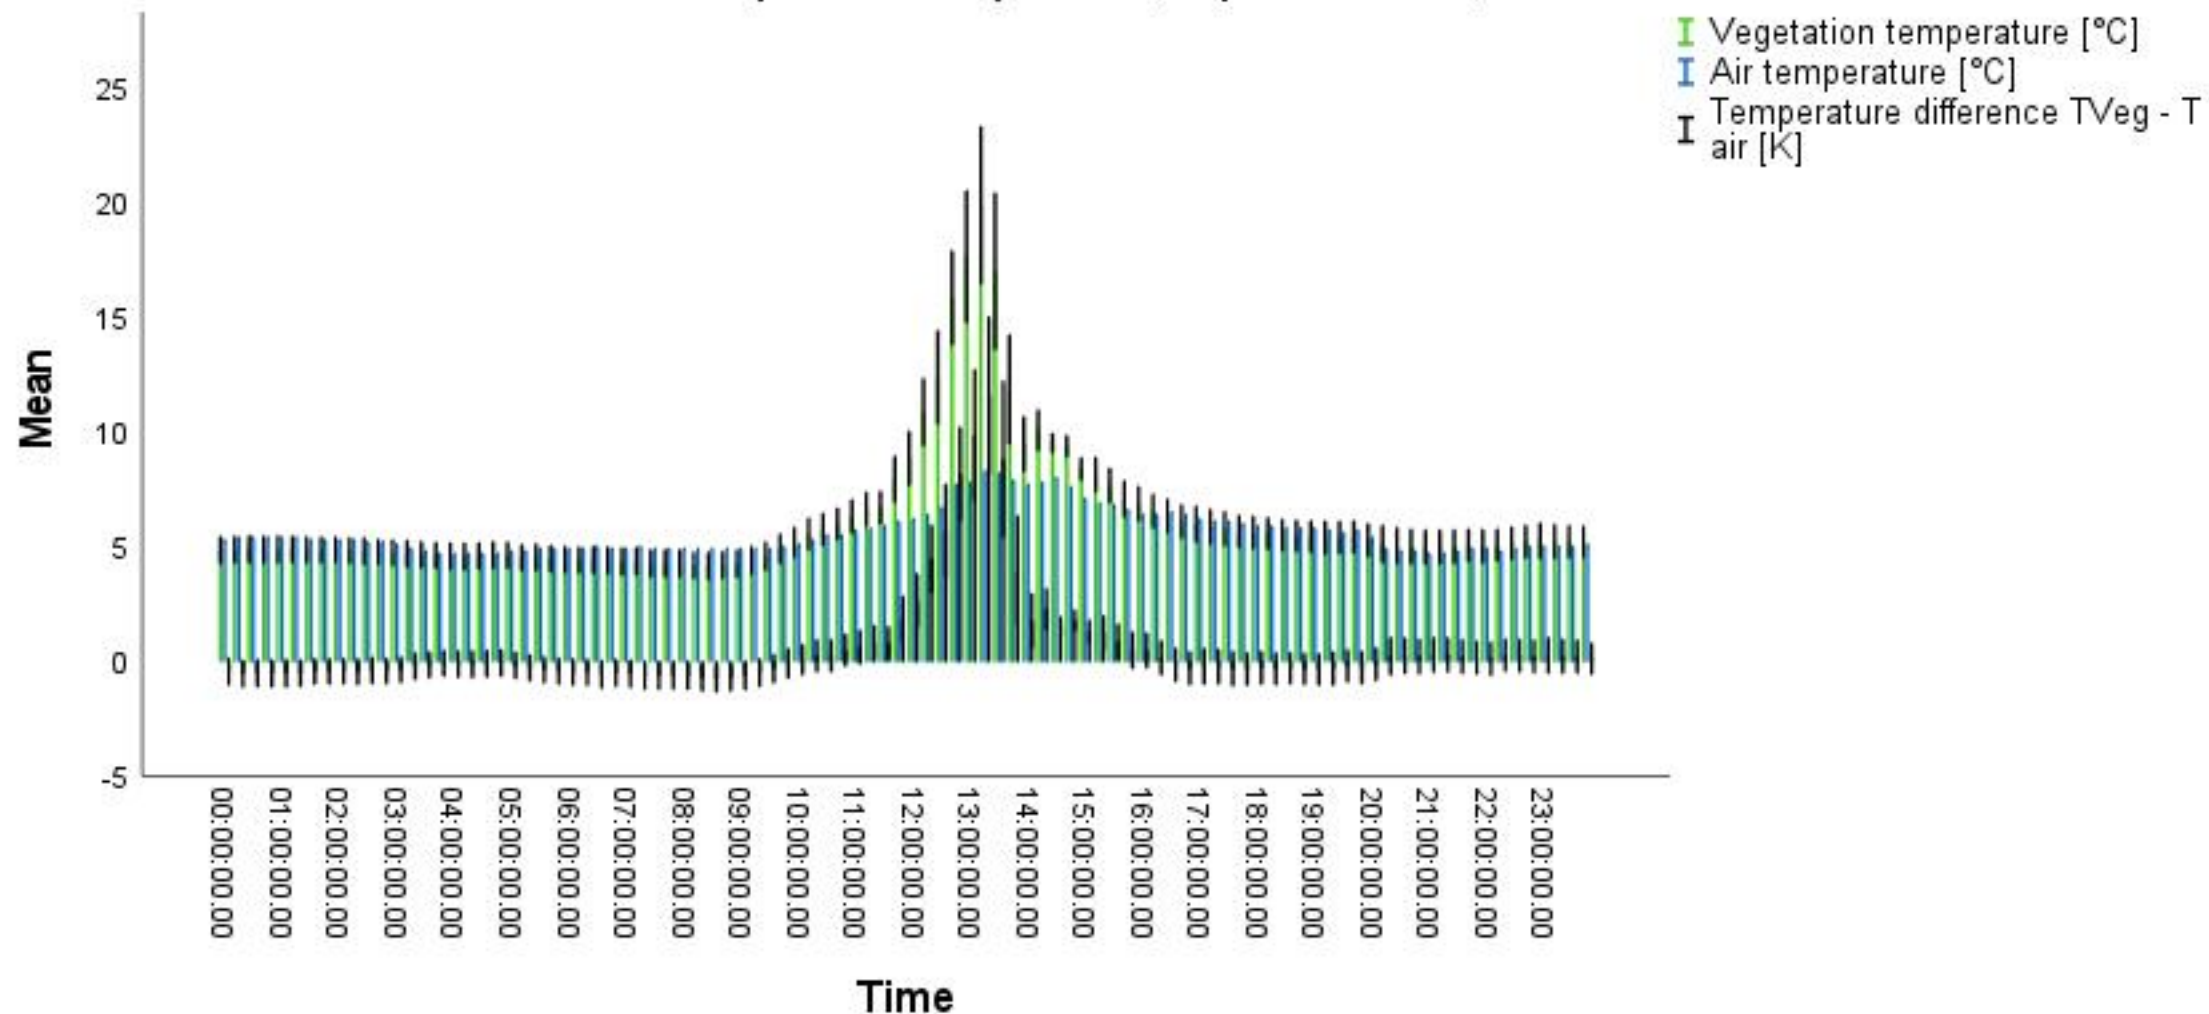

Fehlerbalken: 95% CI

Fehlerbalken: +/- 1 SD

Plant: *Carex dolichostachya* 'Silver Sceptre', Exposition: North, DOY: 1

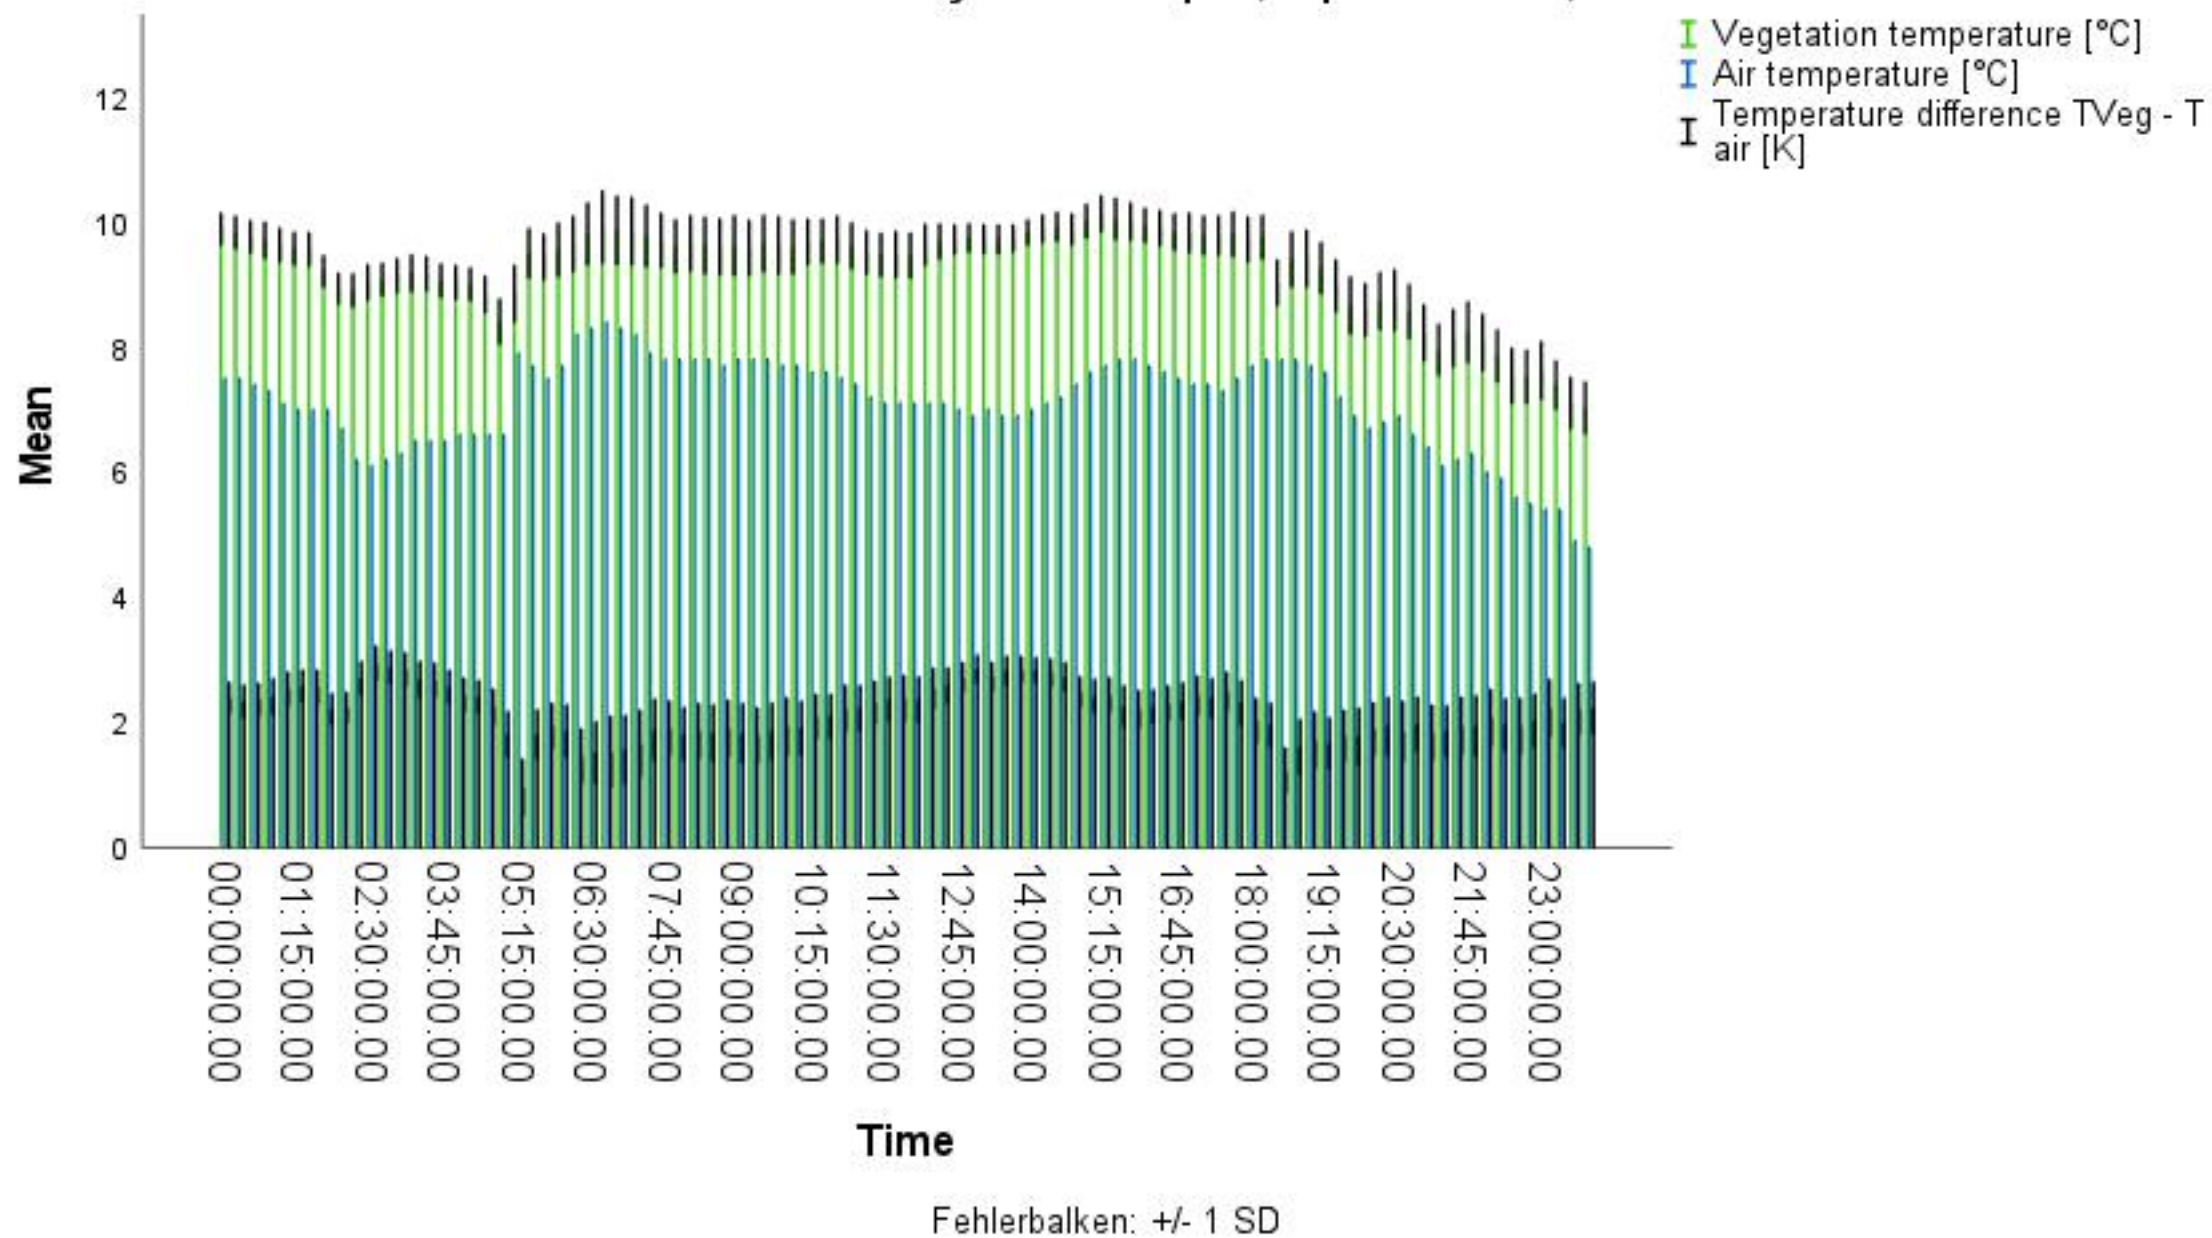



Plant: *Carex dolichostachya* 'Silver Sceptre', Exposition: North, DOY: 2

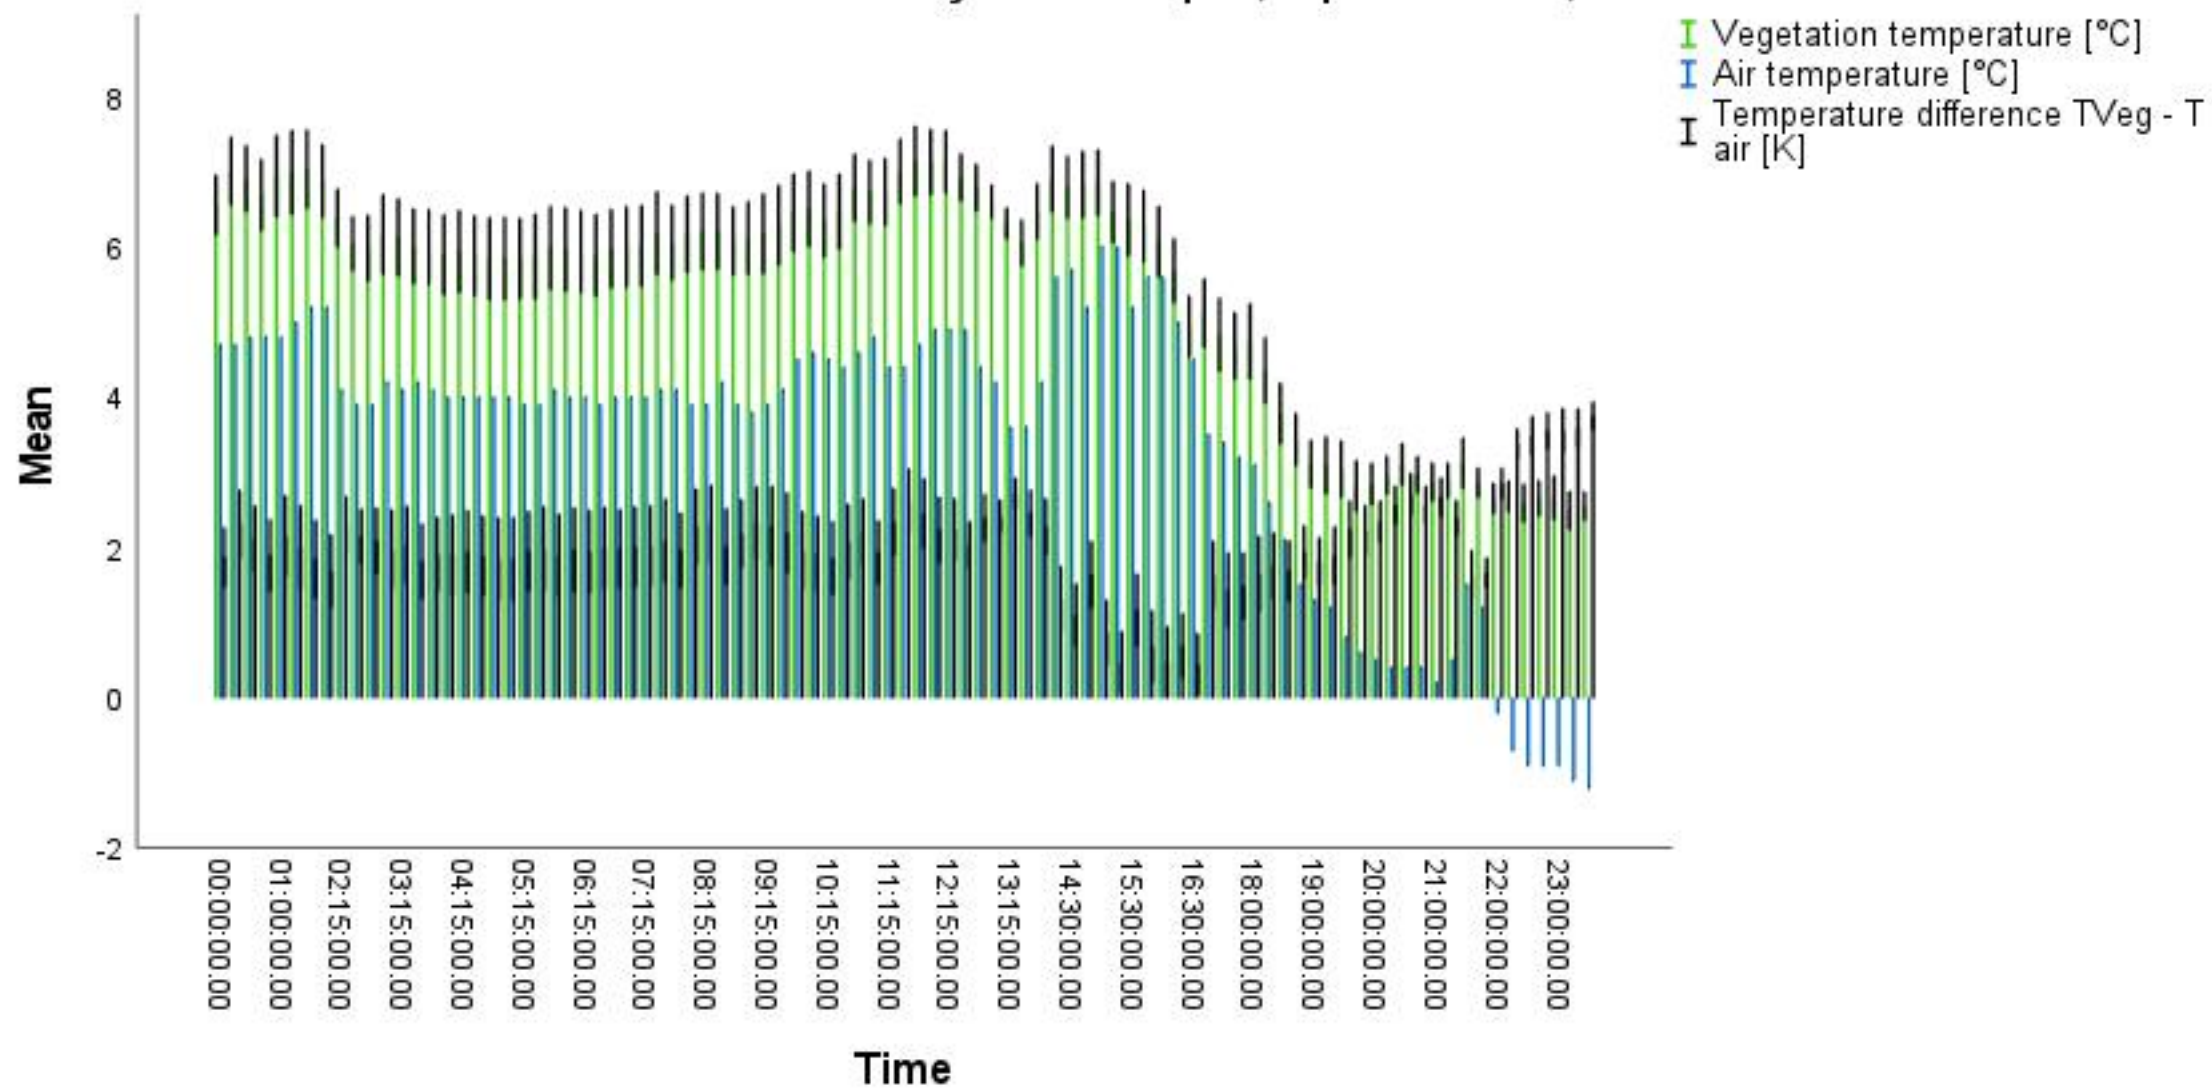

Plant: *Geum coccineum* 'Carlskaer', Exposition: South, DOY: 344

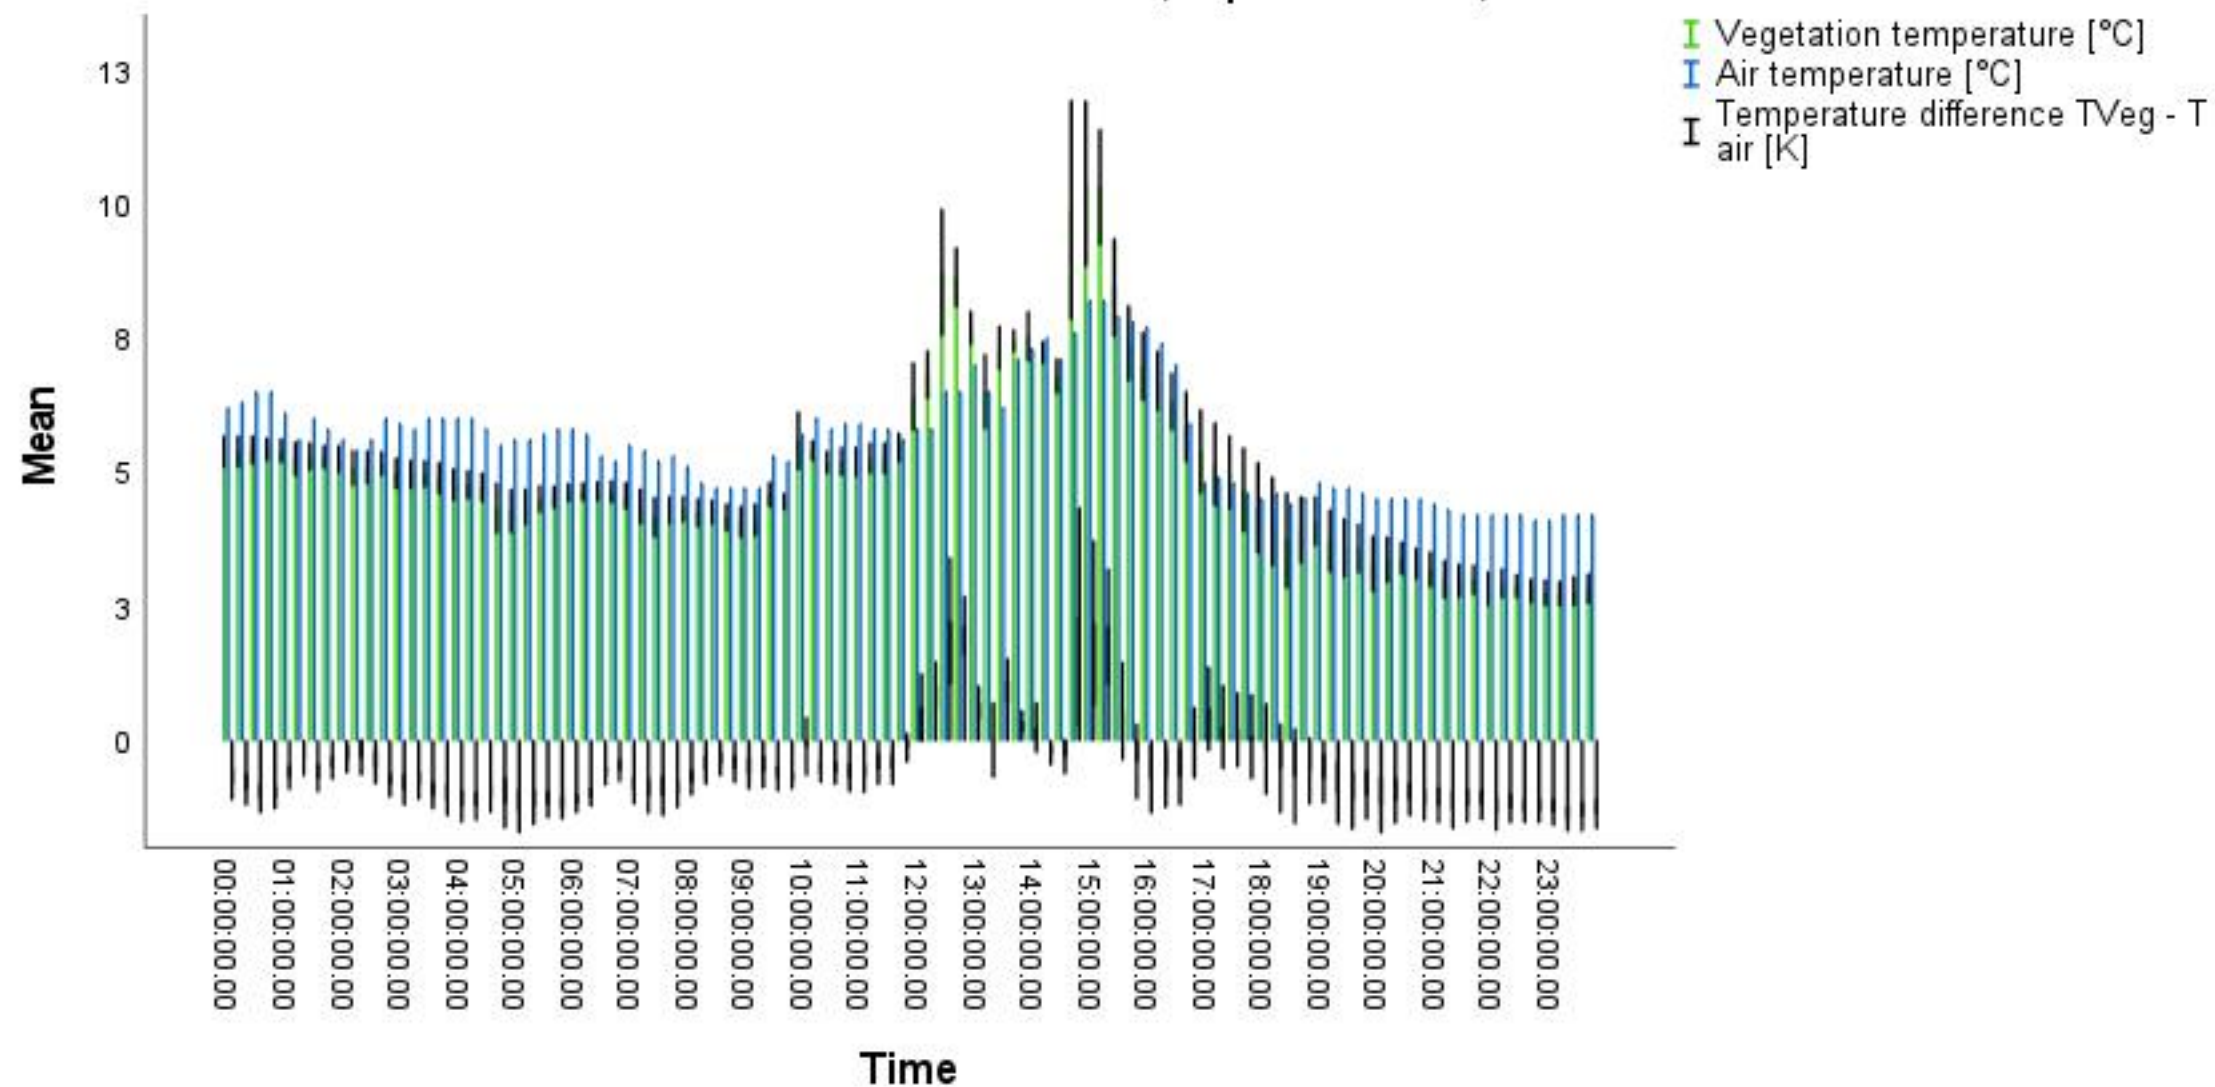

Fehlerbalken: +/- 1 SD

Plant: *Geum coccineum* 'Carlskaer', Exposition: South, DOY: 345

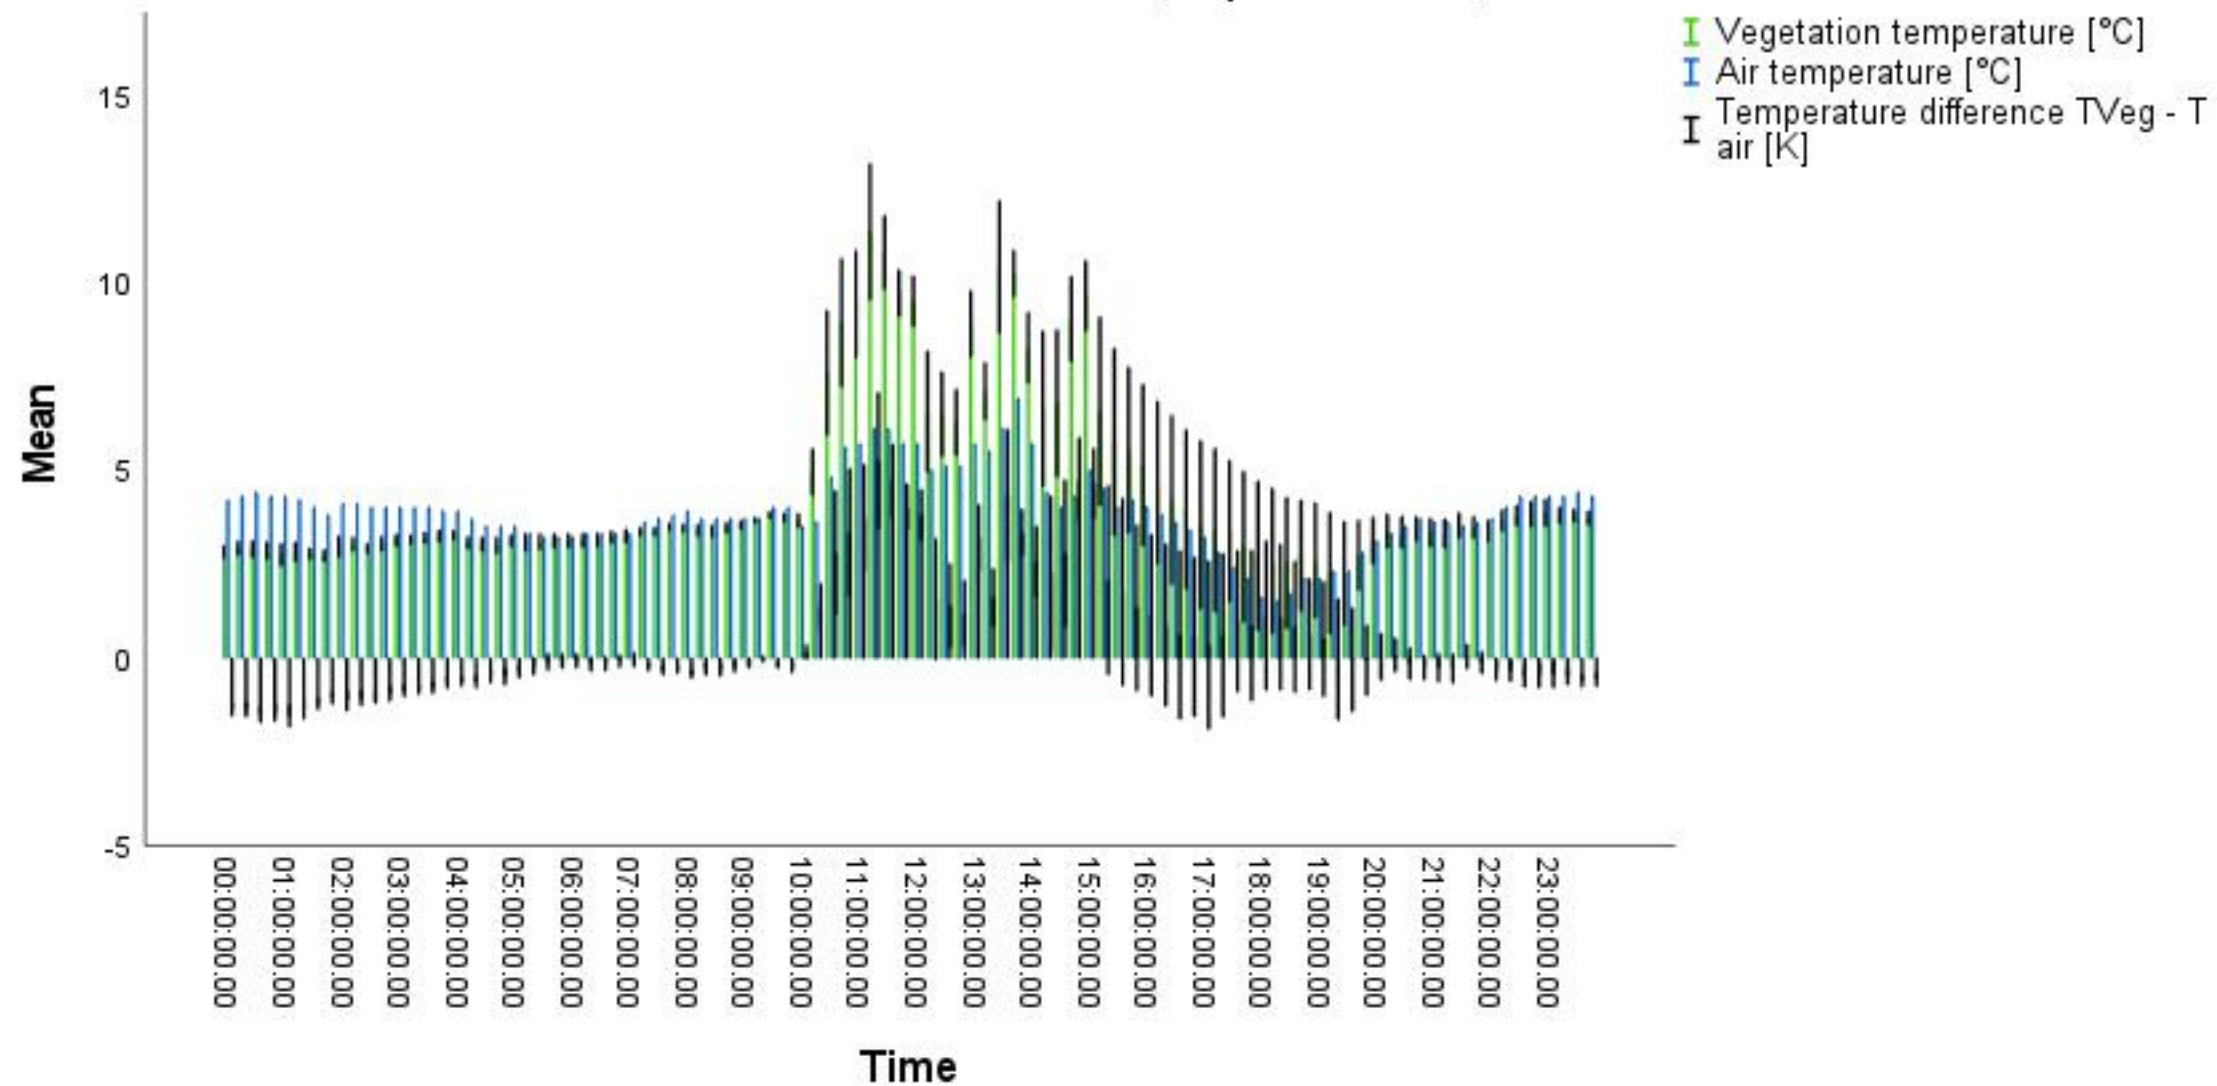

Fehlerbalken: +/- 1 SD

Plant: *Glechoma hederacea*, Exposition: West, DOY: 274

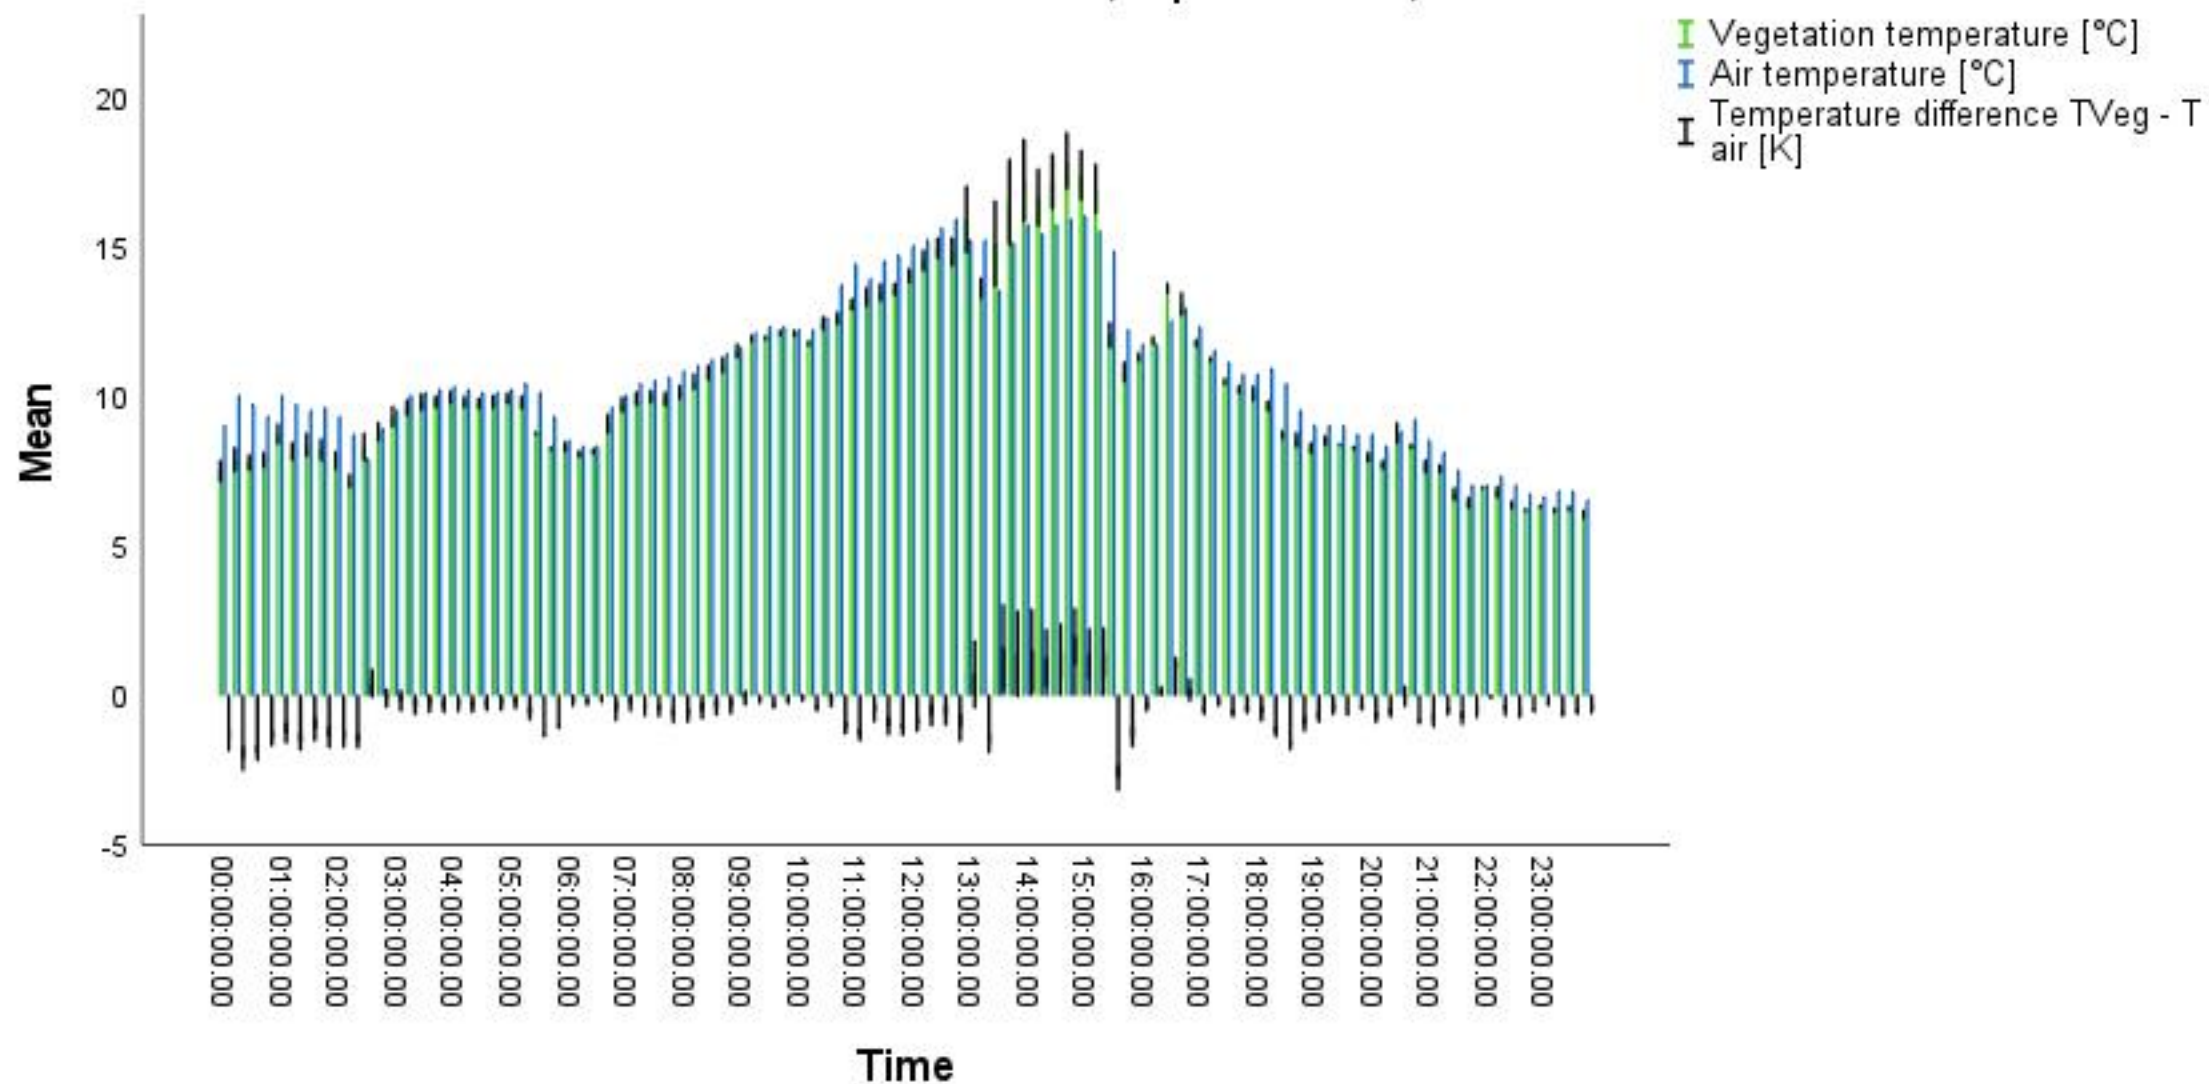

Fehlerbalken: +/- 1 SD

Plant: *Glechoma hederacea*, Exposition: West, DOY: 275

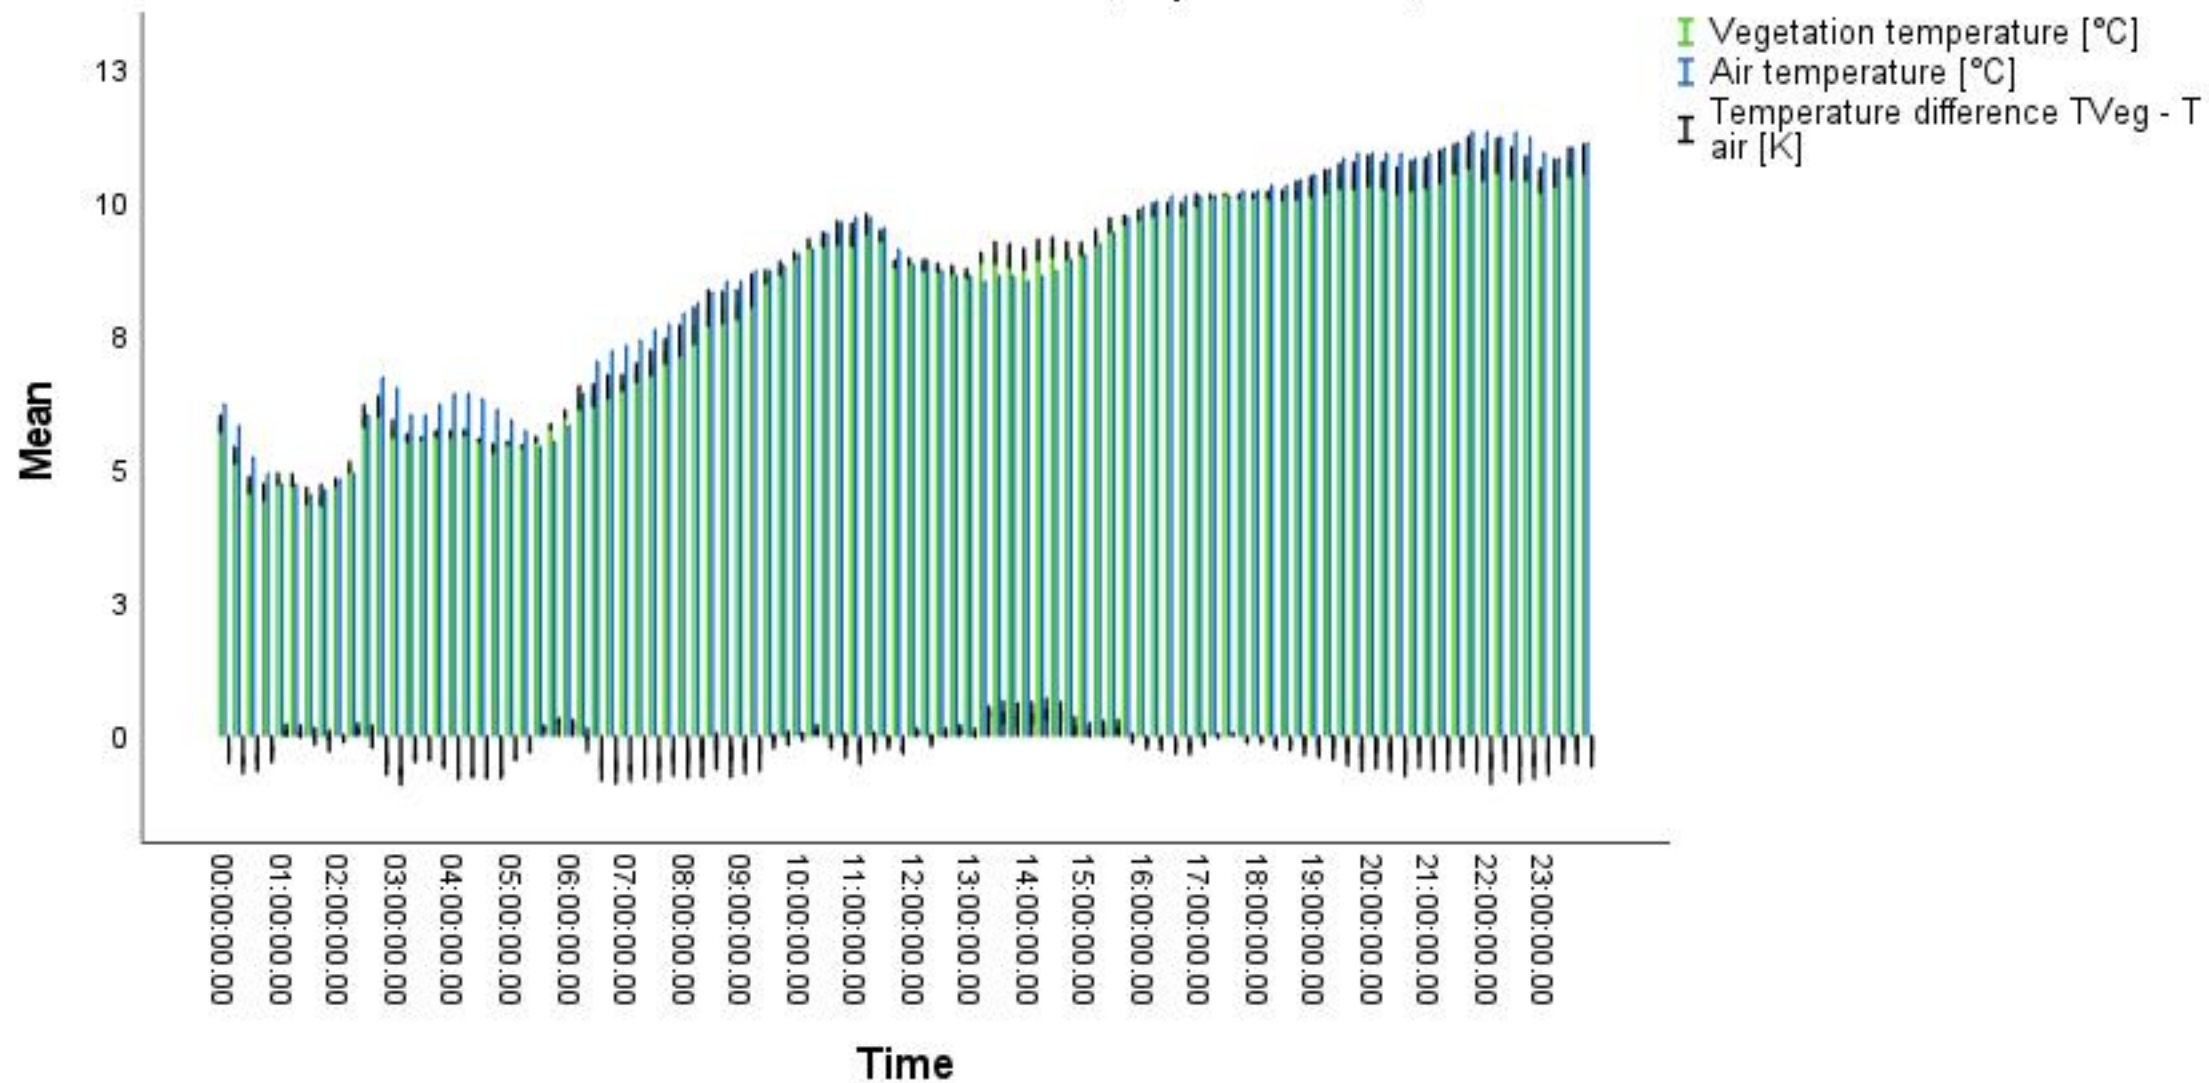

Fehlerbalken: +/- 1 SD



Plant: *Hemerocallis x cultorum* 'Mini Stella', Exposition: East, DOY: 300

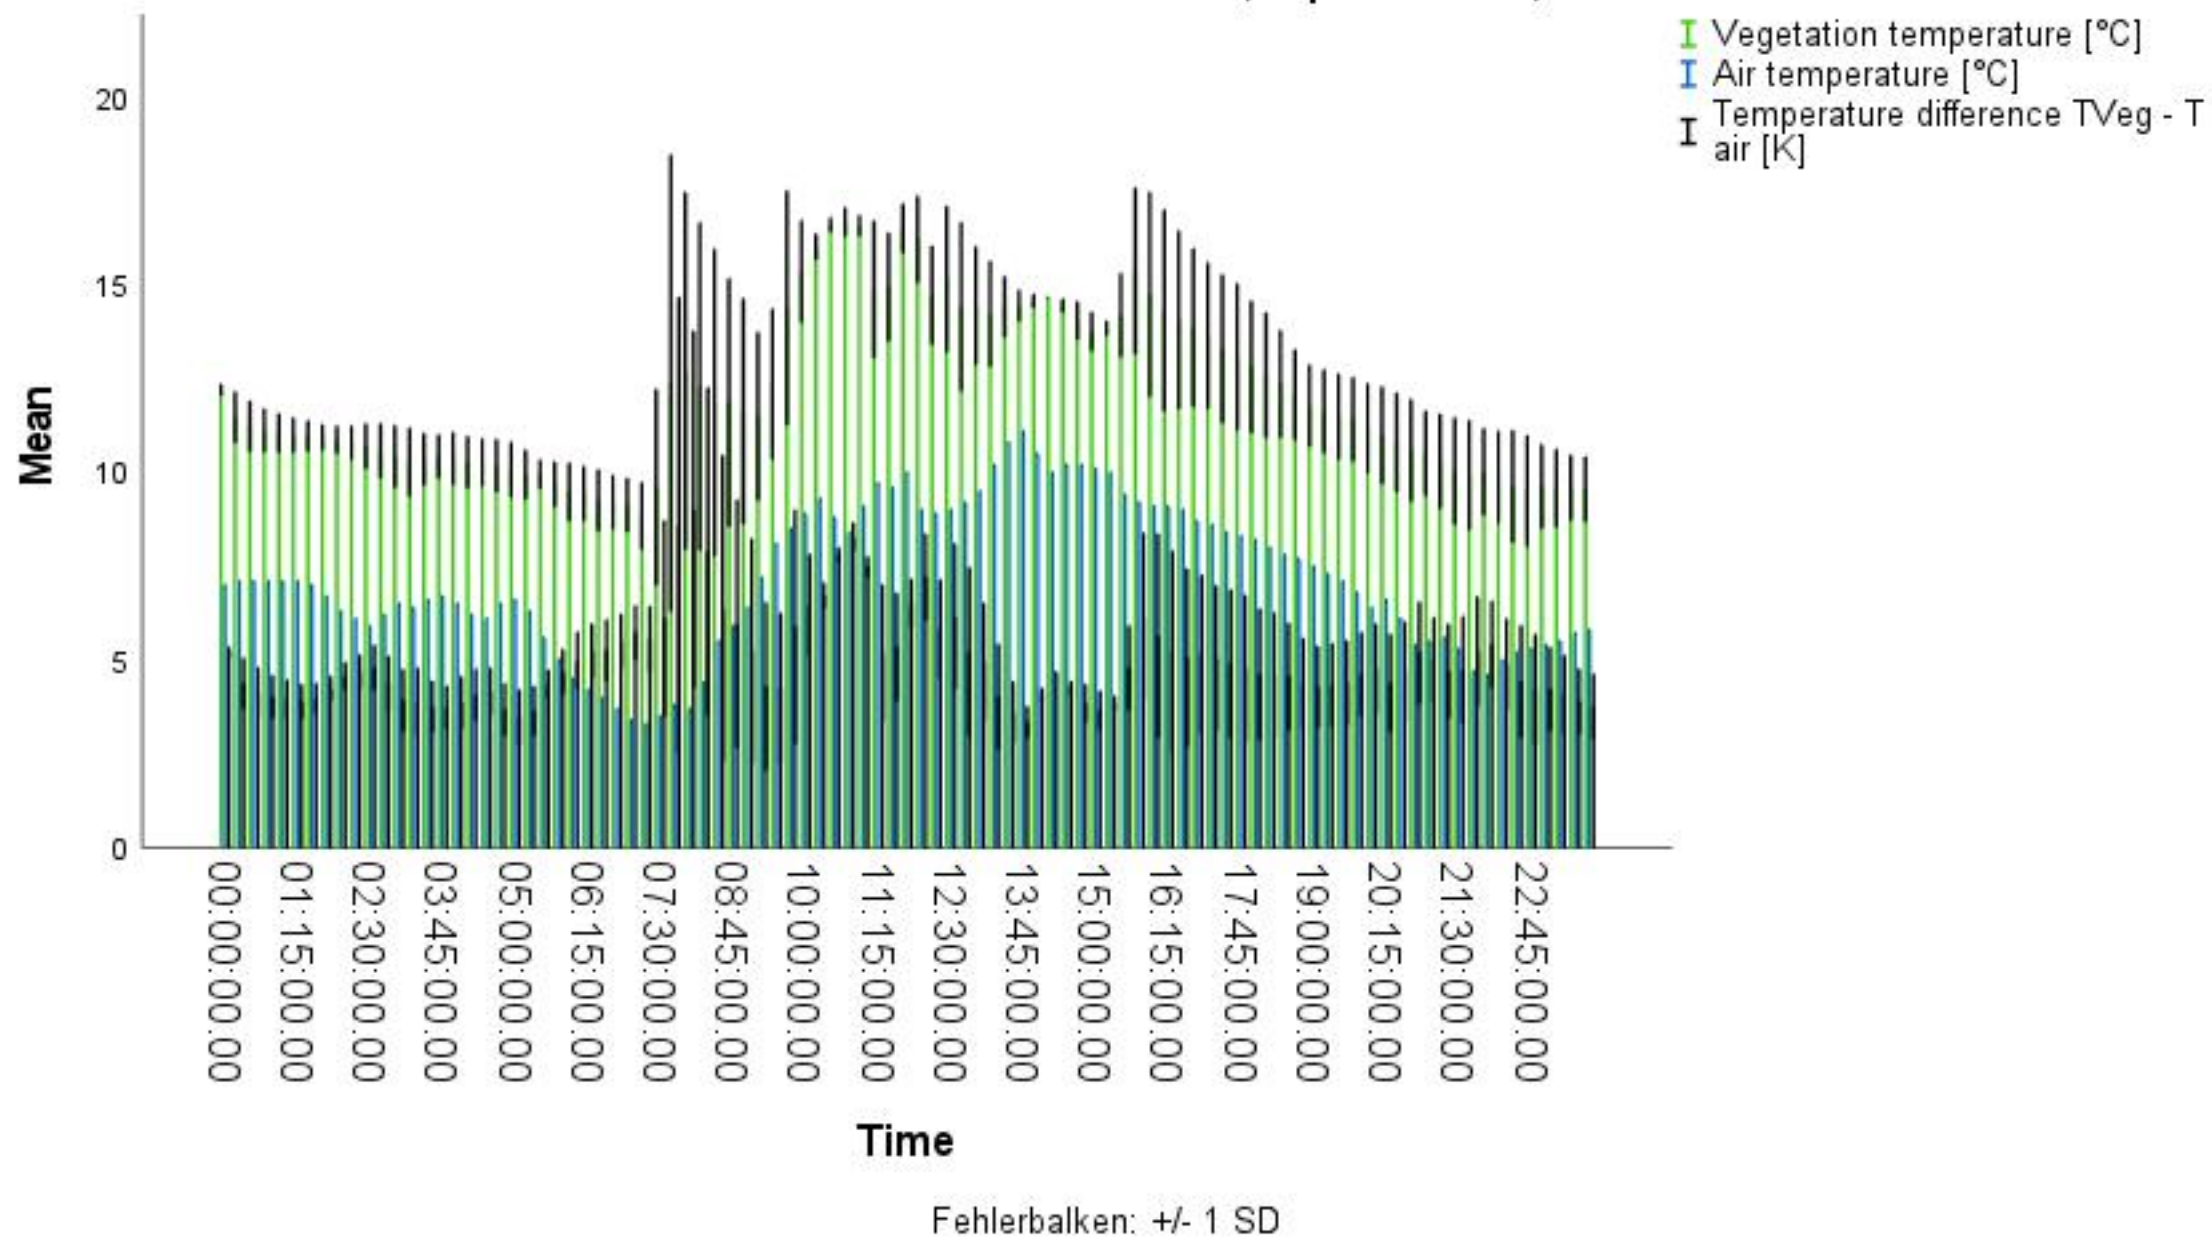

Plant: *Hemerocallis x cultorum* 'Mini Stella', Exposition: East, DOY: 301

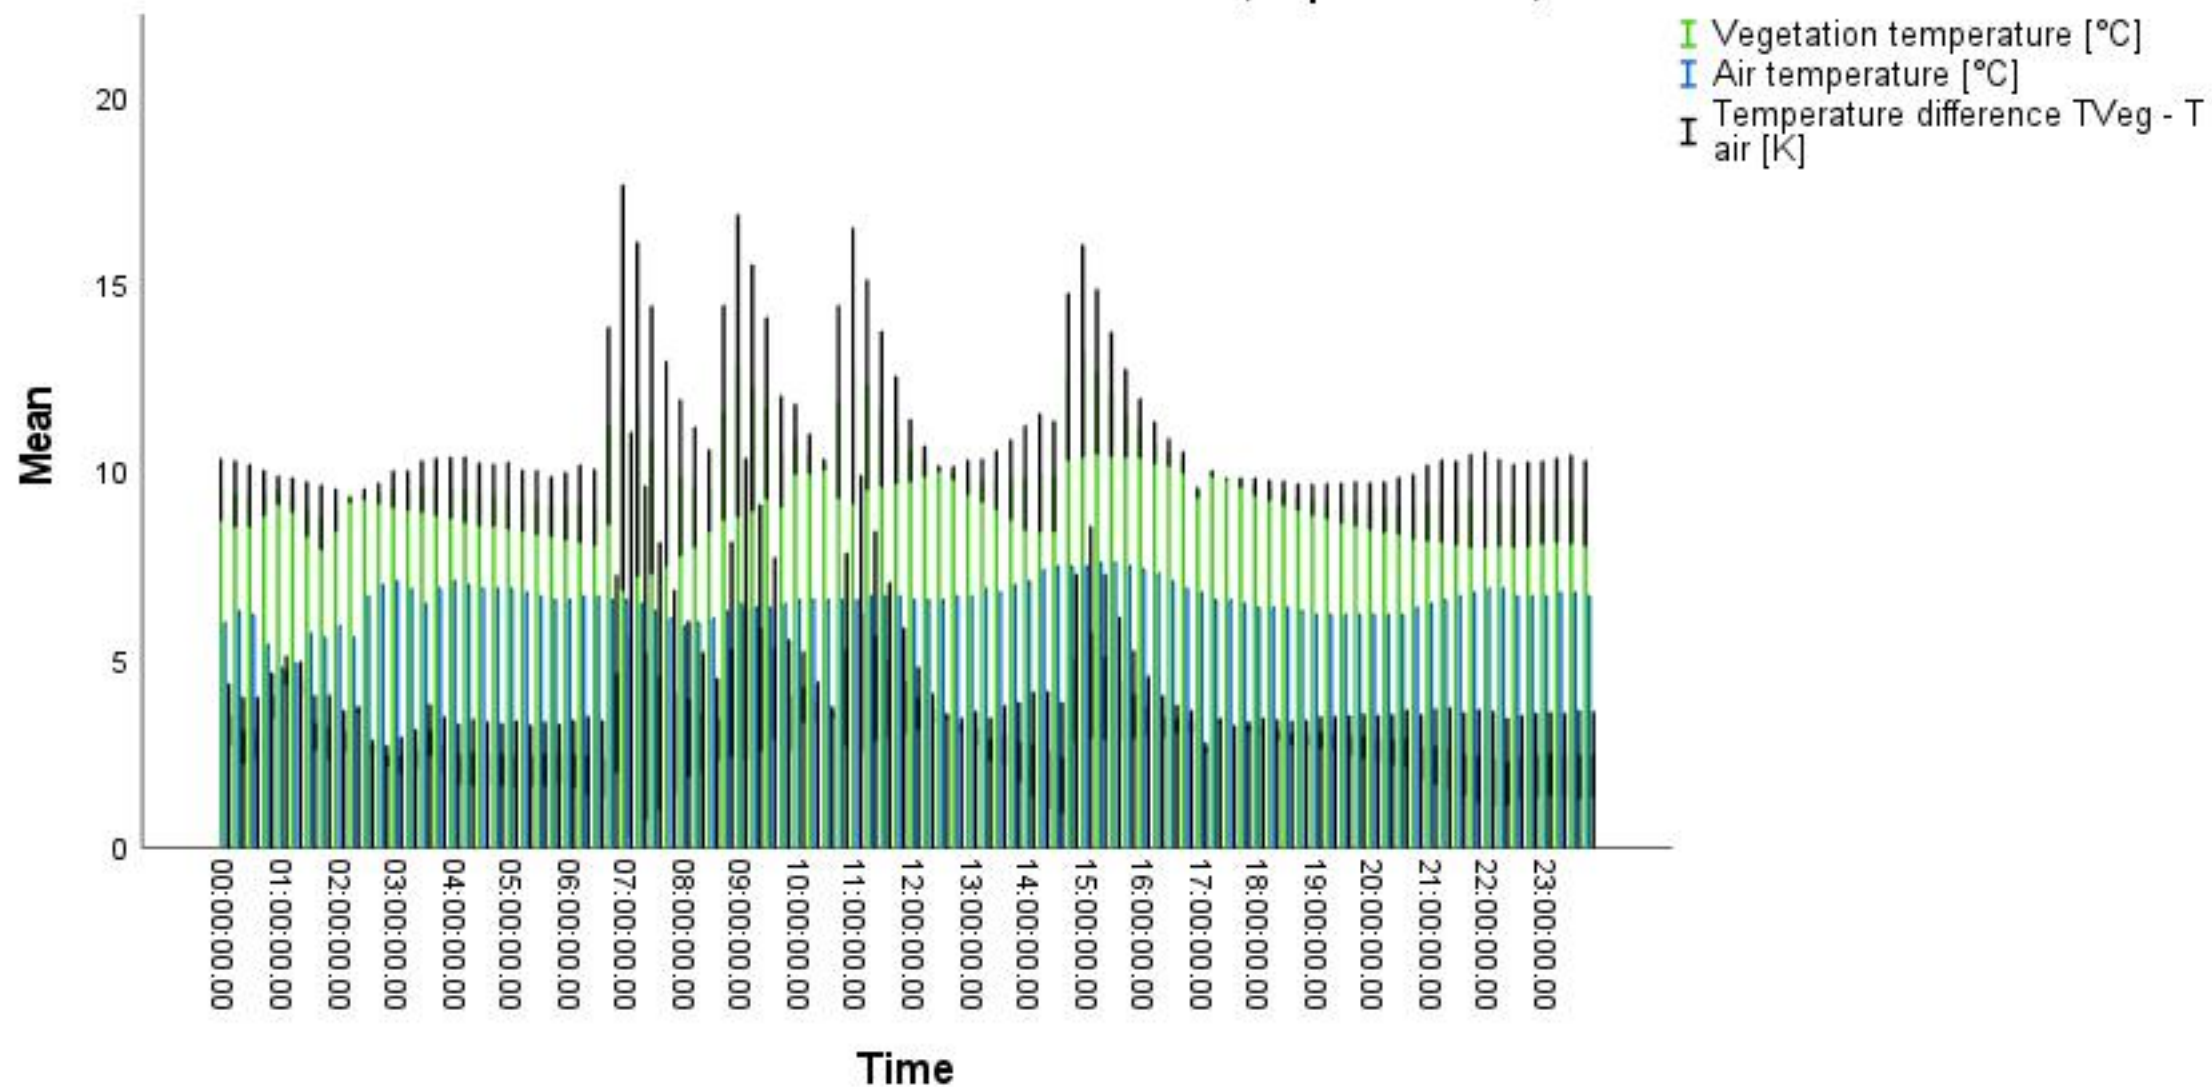

Fehlerbalken: +/- 1 SD

Plant: Heuchera Hybride 'Purple Petticoats', Exposition: South, DOY: 348

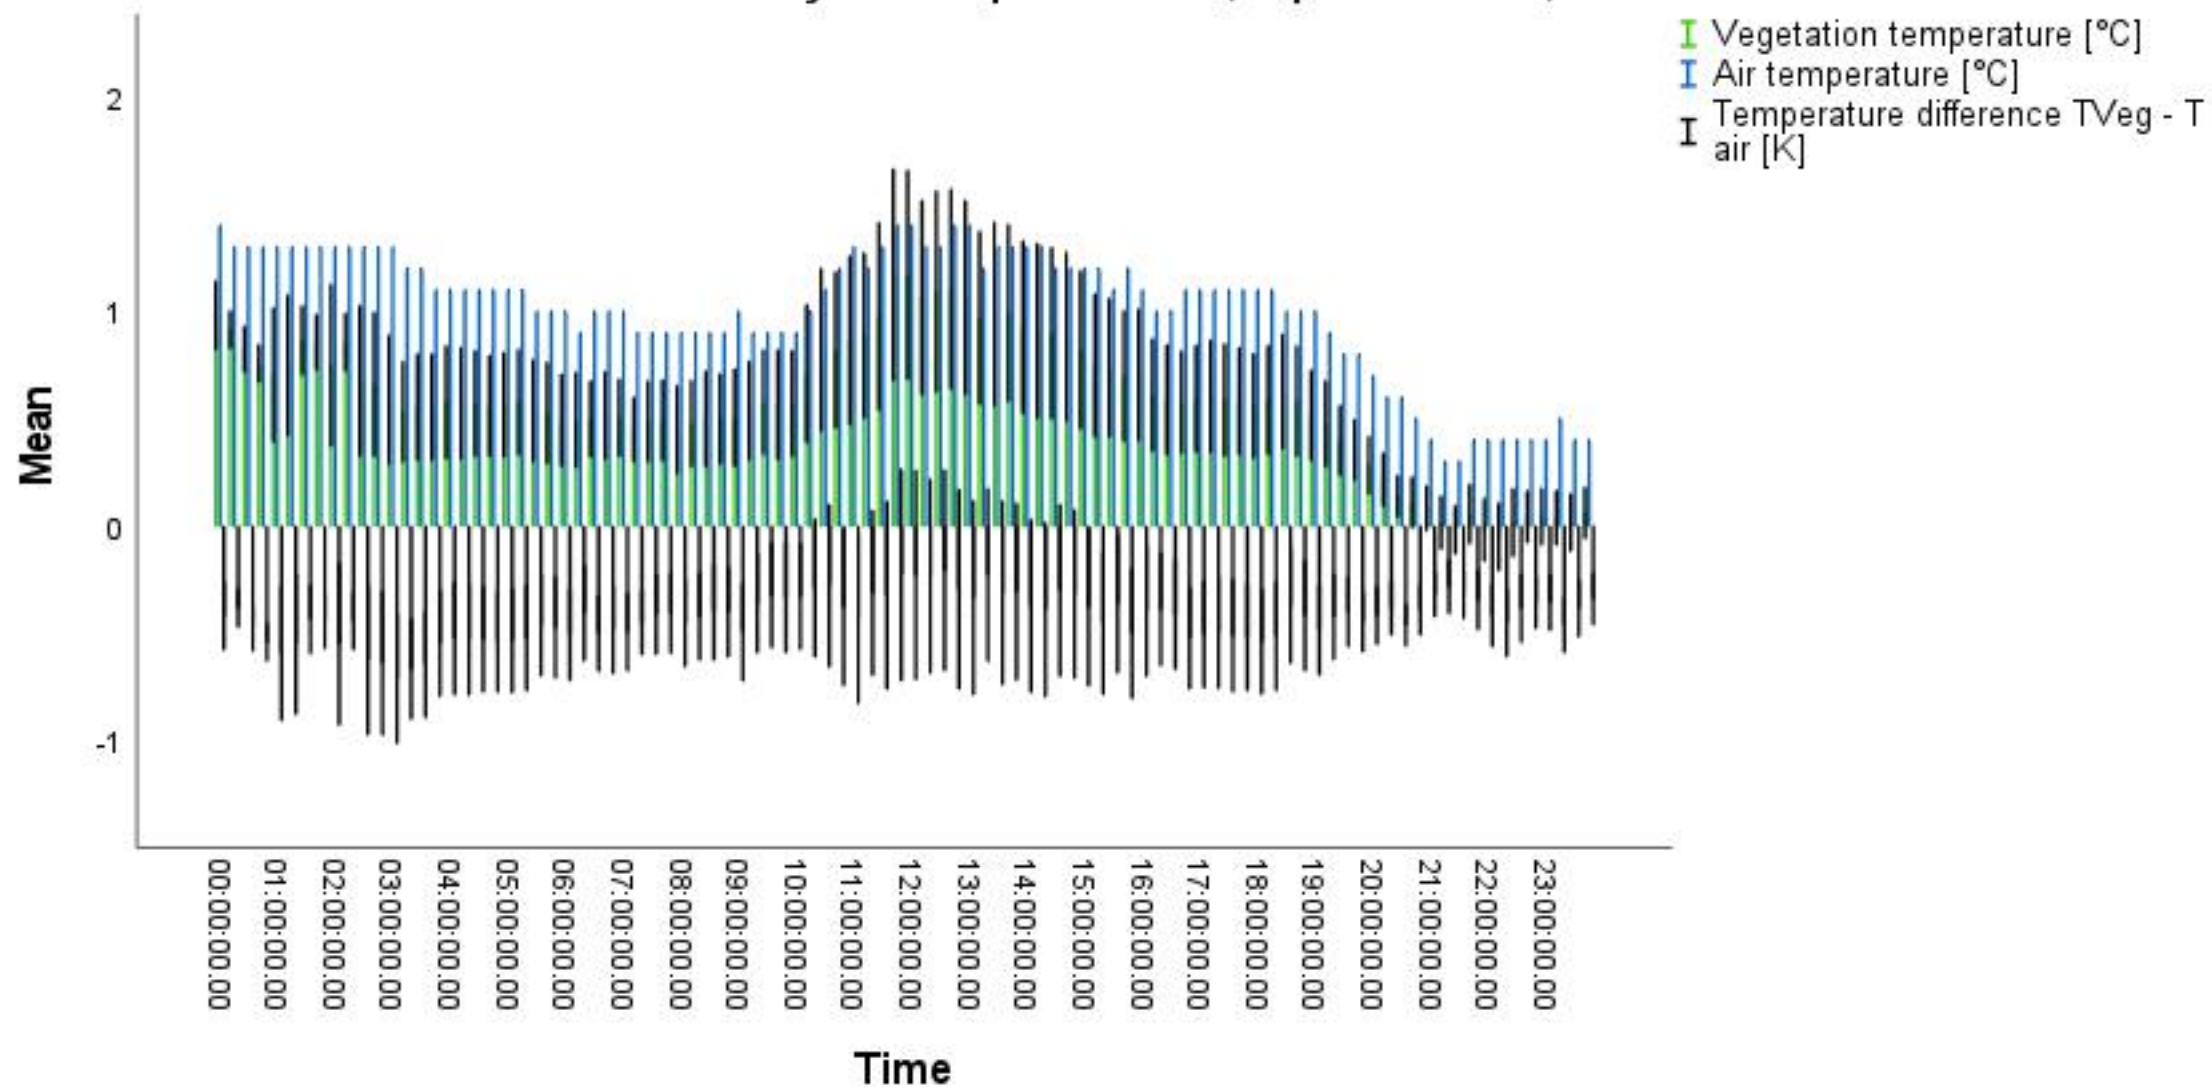

Fehlerbalken: +/- 1 SD

Plant: Heuchera Hybride 'Purple Petticoats', Exposition: South, DOY: 349

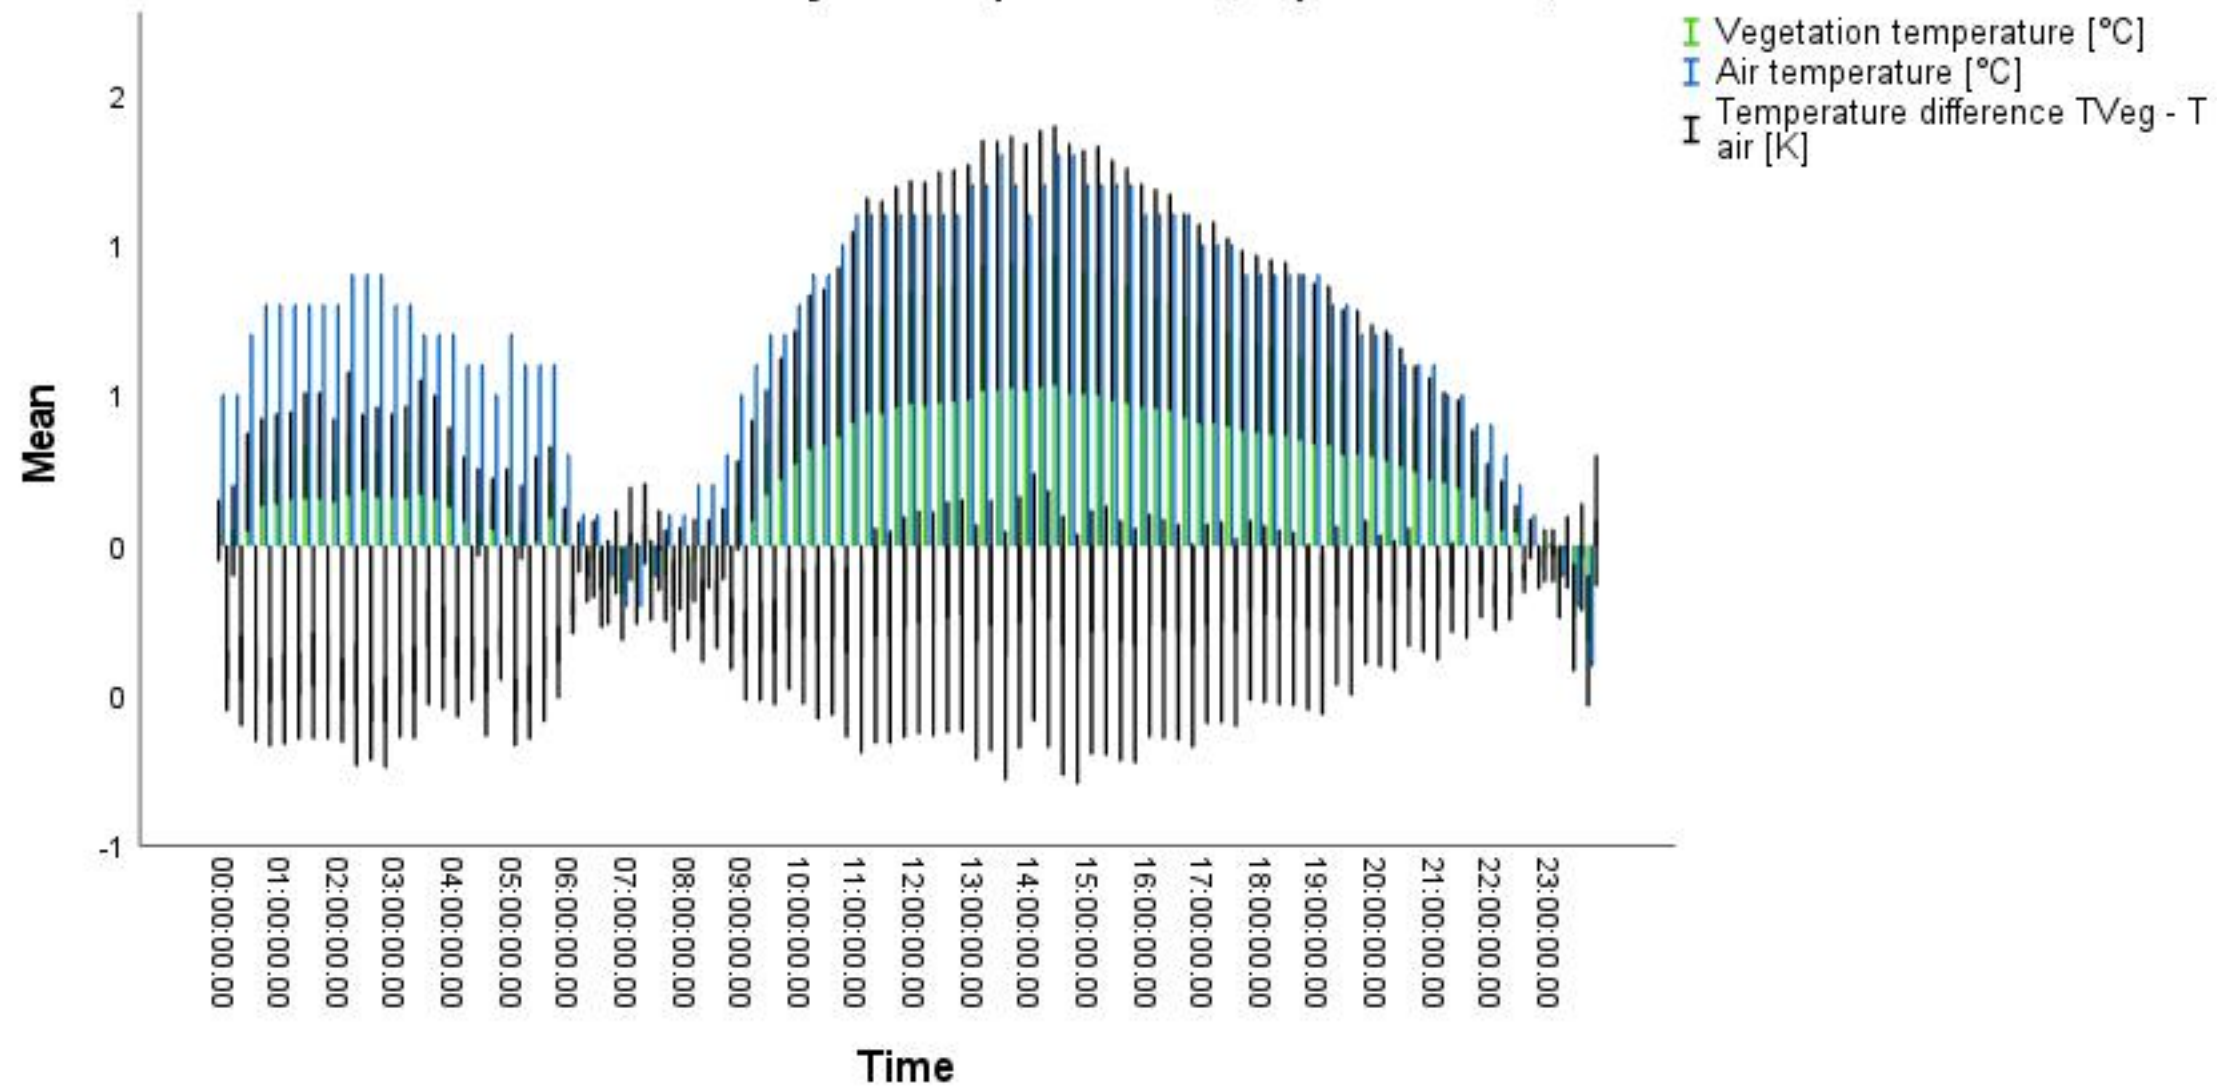

Fehlerbalken: +/- 1 SD

Plant: *Iris foetidissima*, Exposition: East, DOY: 323

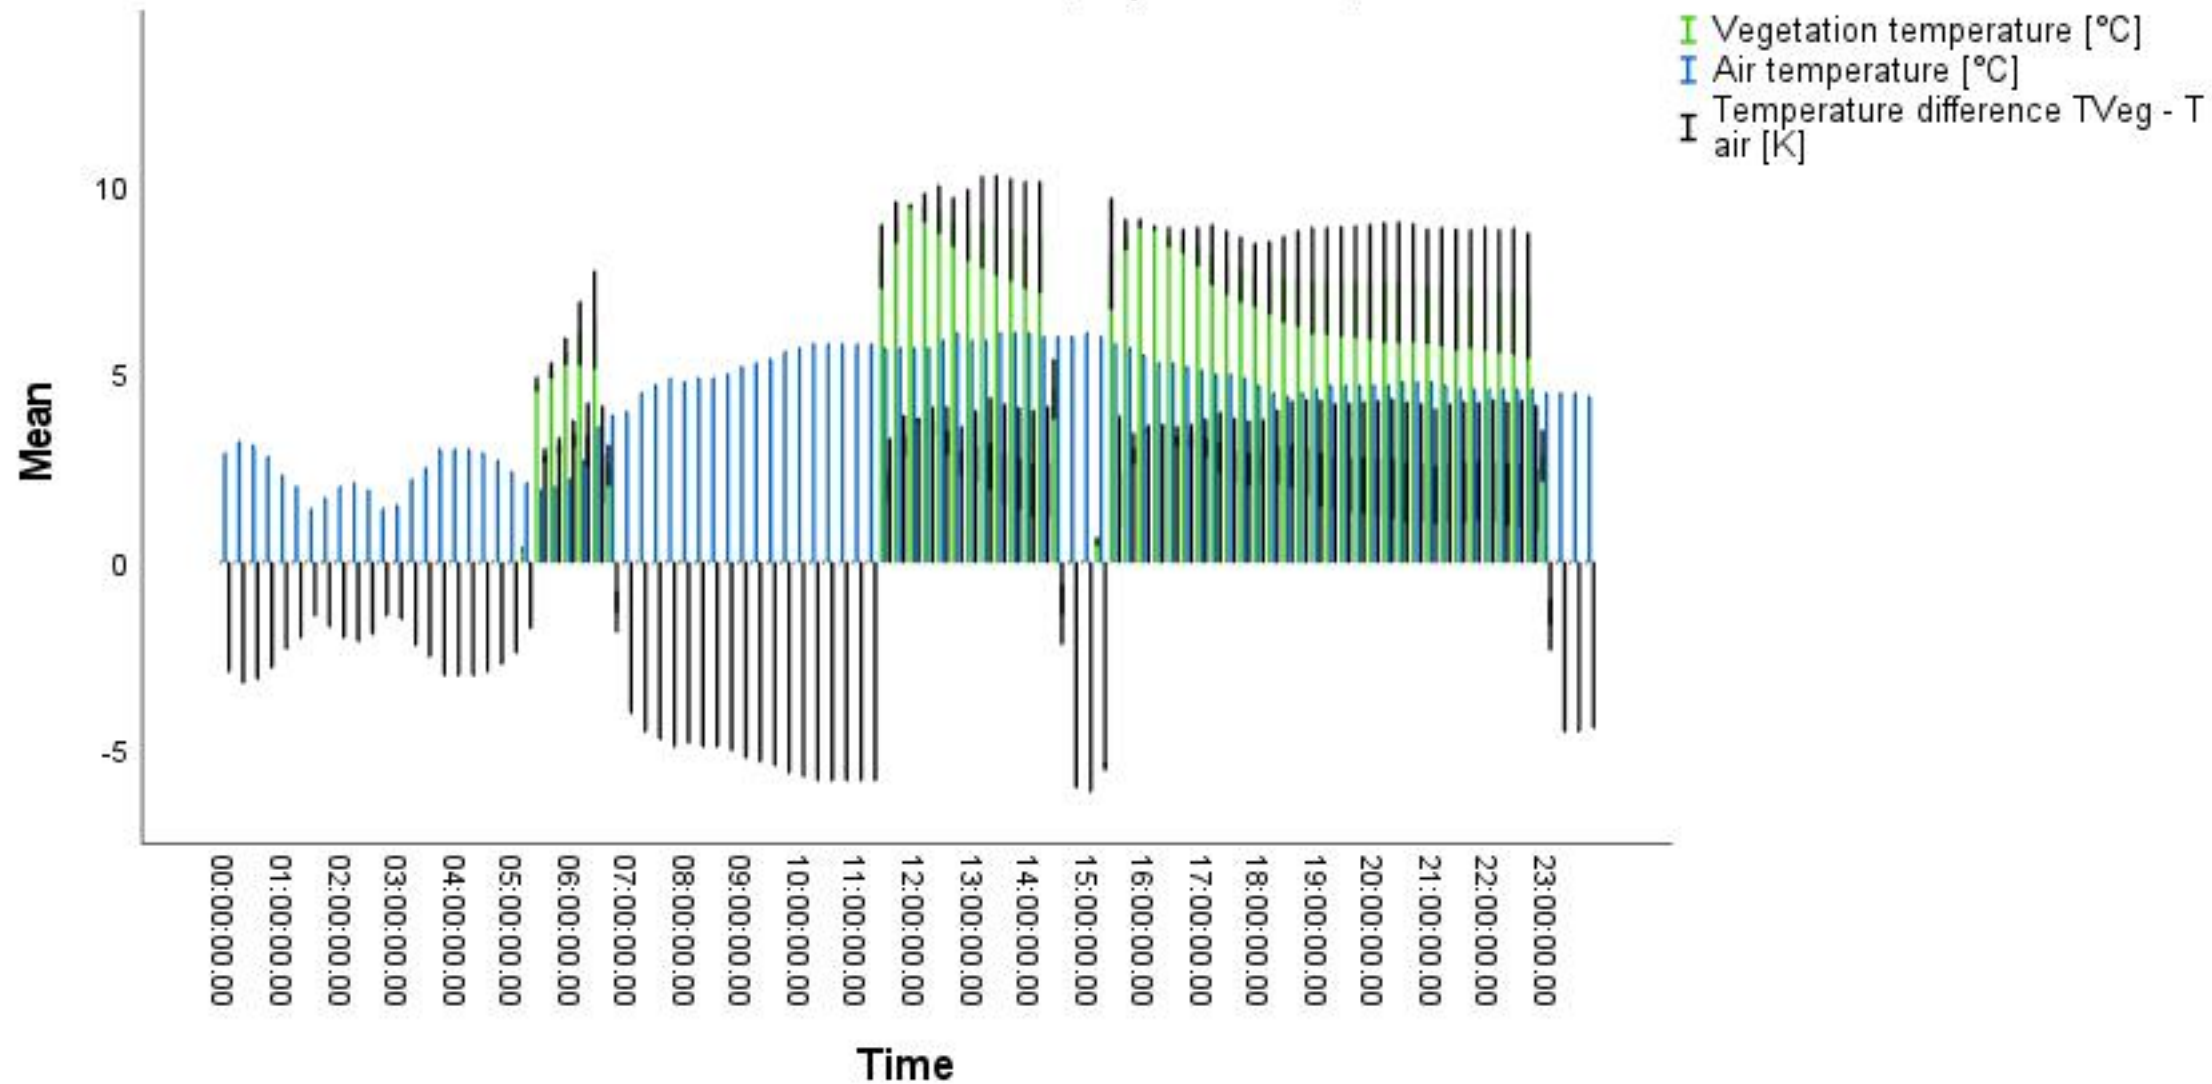

Fehlerbalken:  $\pm 1$  SD



Plant: *Iris foetidissima*, Exposition: East, DOY: 324

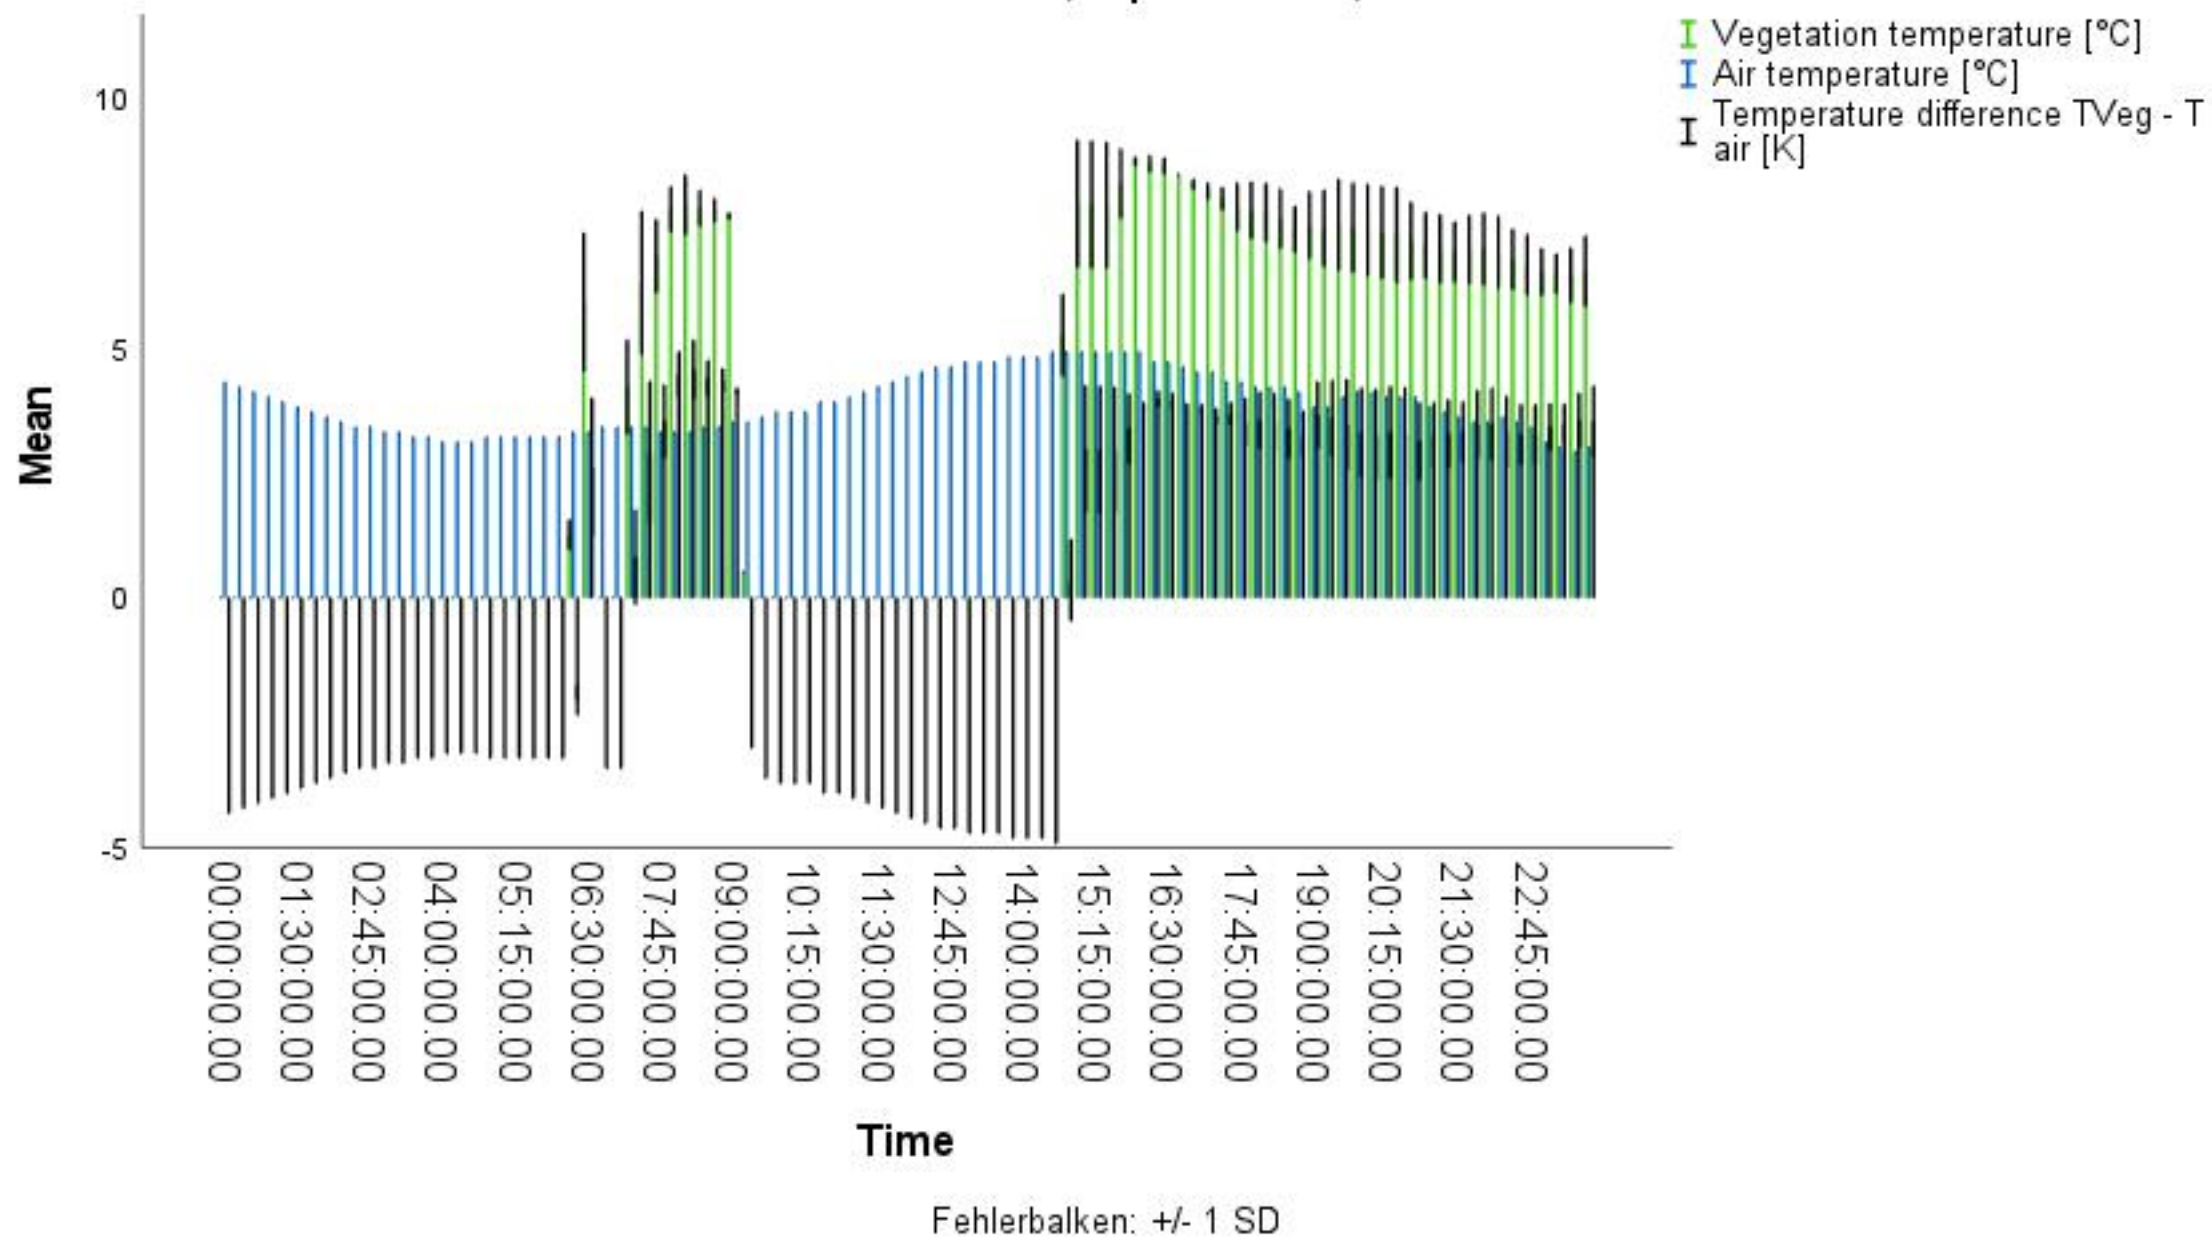

Plant: *Lysimachia nummularia* 'Aurea', Exposition: East, DOY: 254

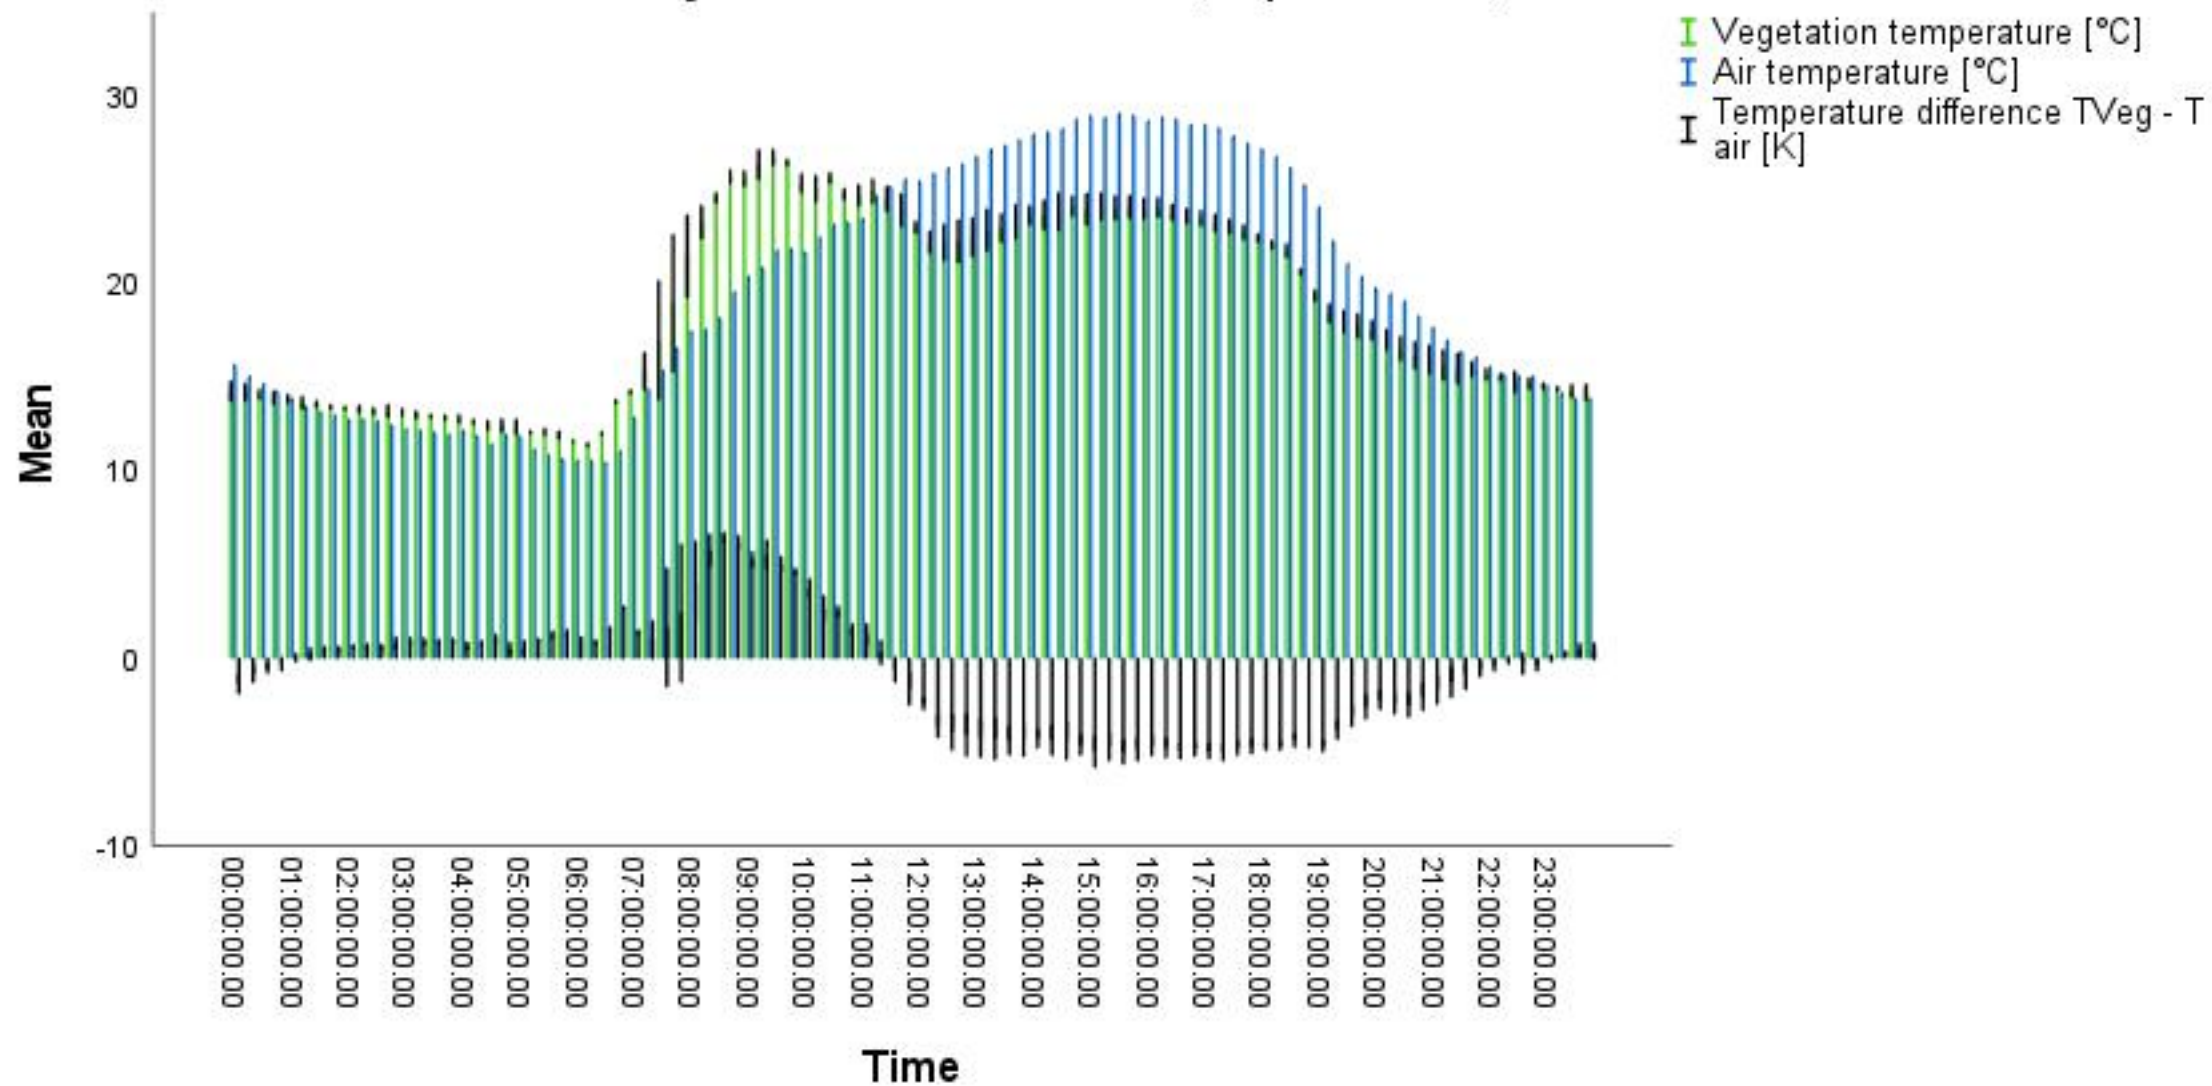

Fehlerbalken:  $\pm 1$  SD

Plant: *Lysimachia nummularia* 'Aurea', Exposition: East, DOY: 255

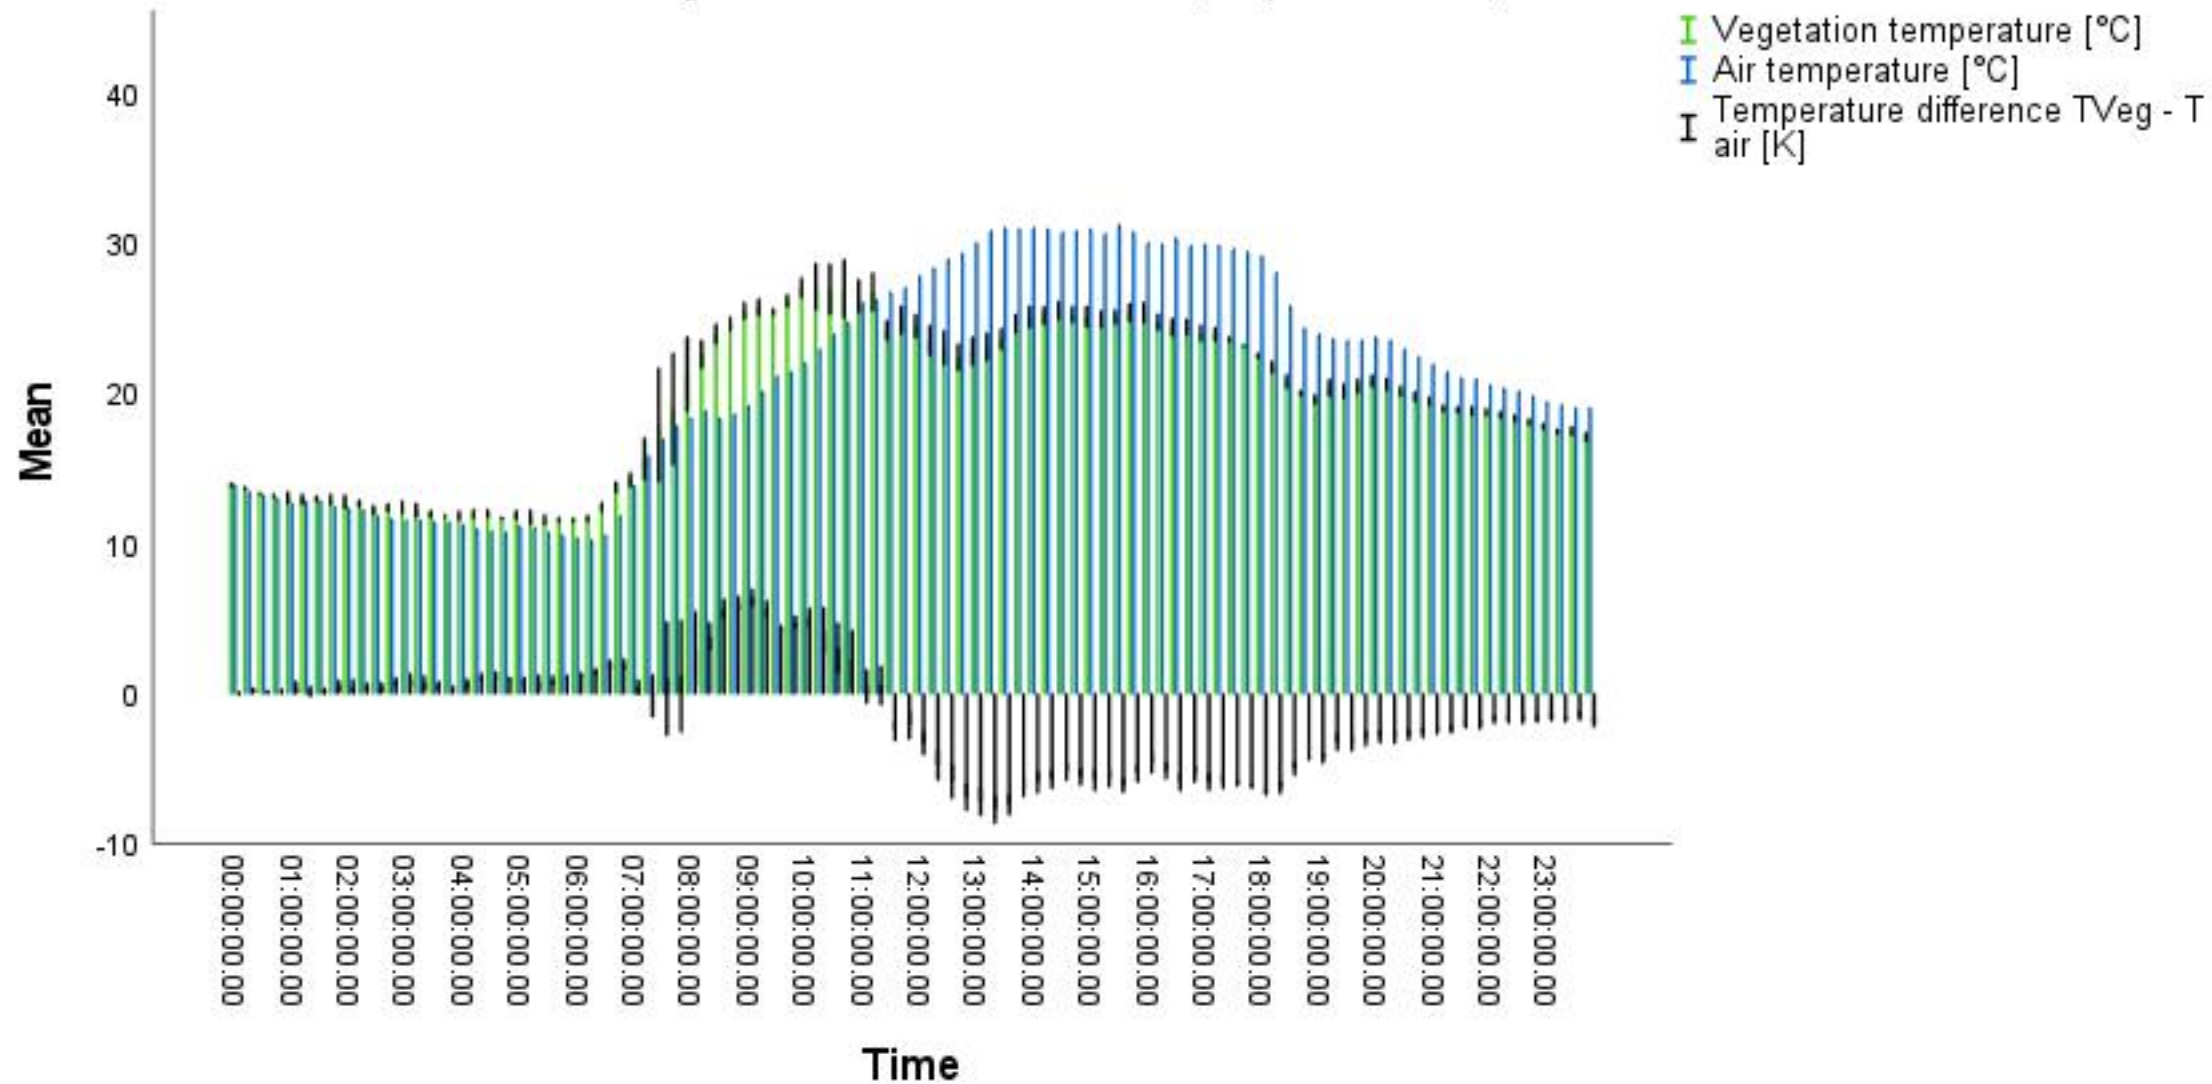

Fehlerbalken: +/- 1 SD

Plant: *Lysimachia nummularia* 'Aurea', Exposition: South, DOY: 323

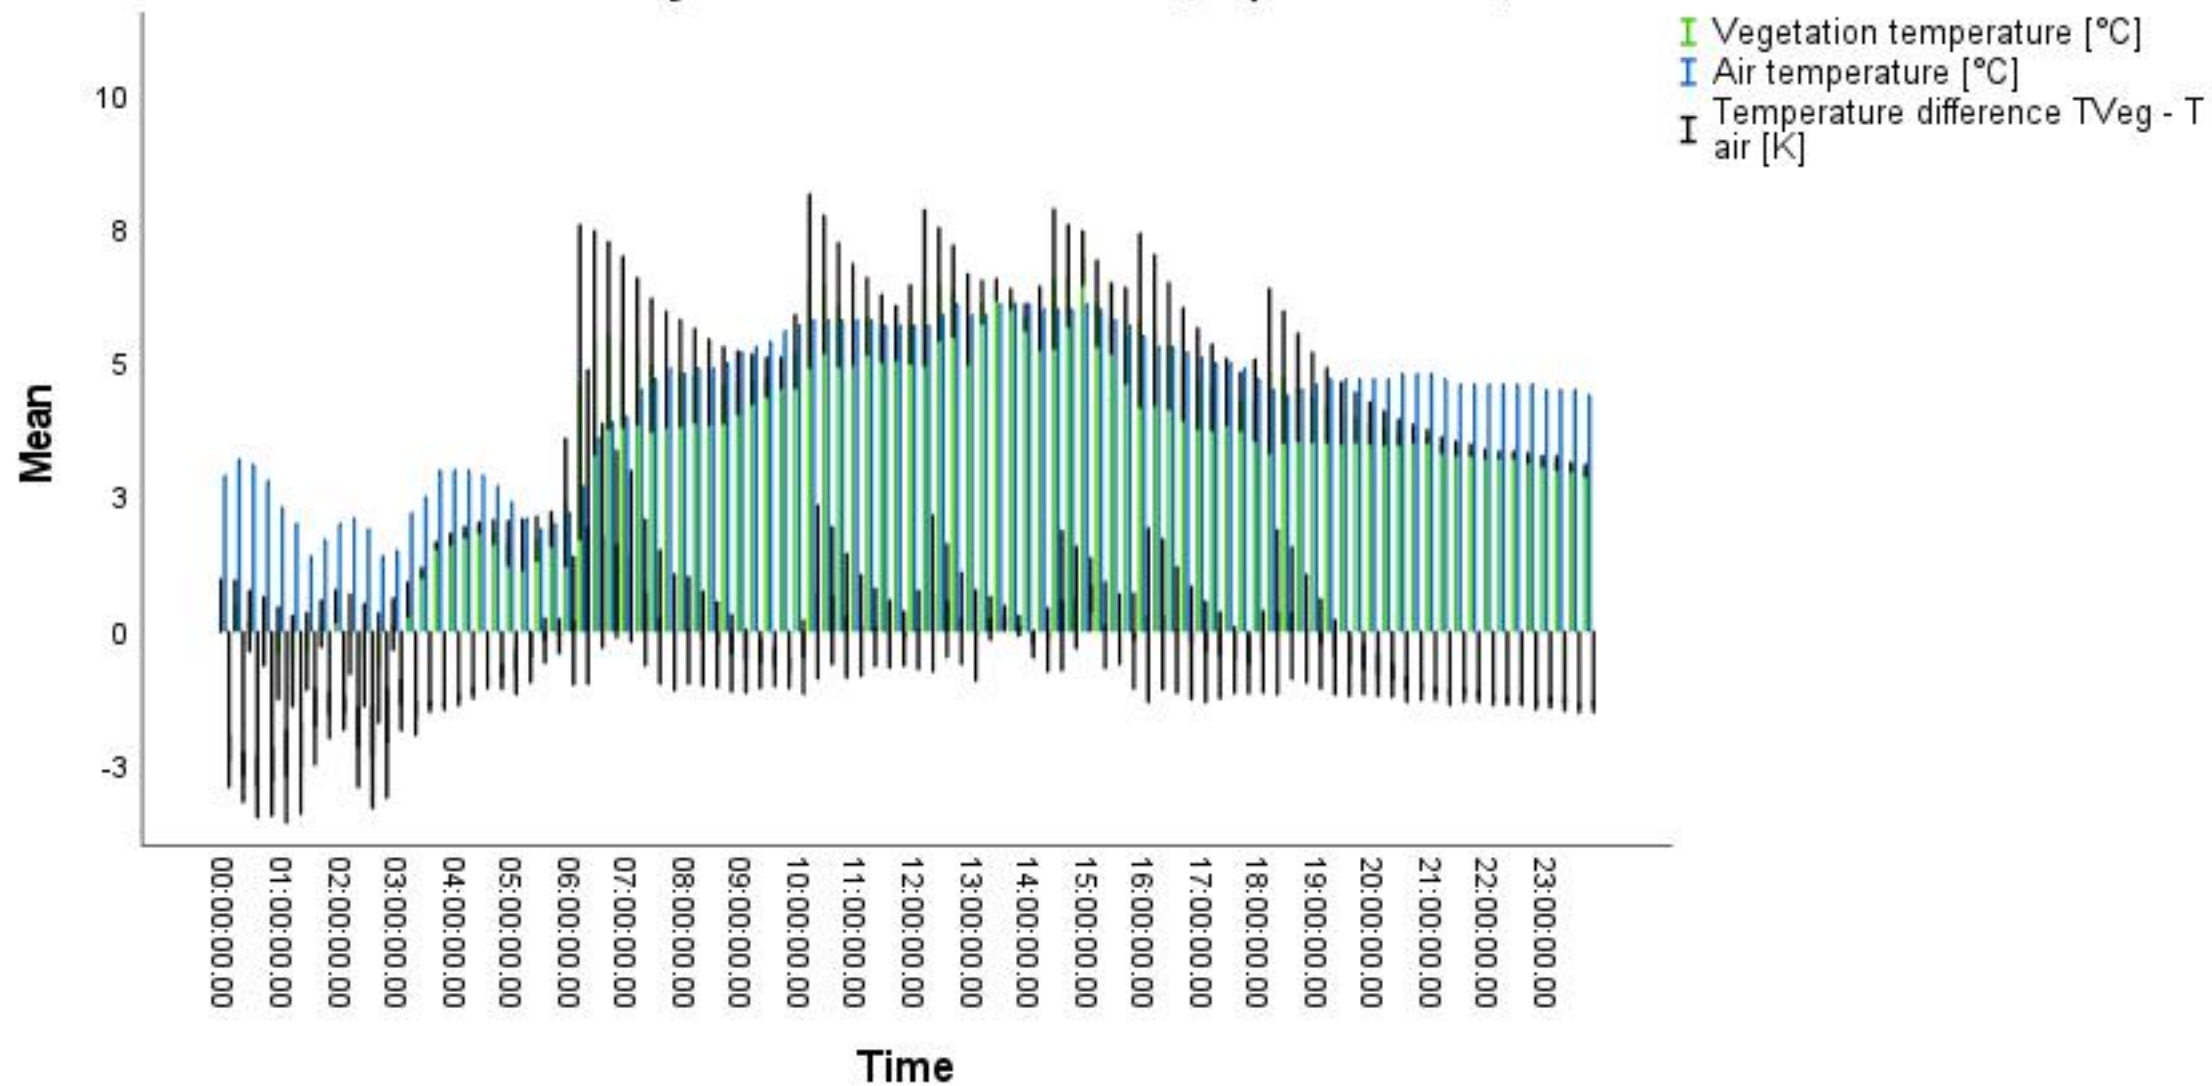

Fehlerbalken:  $\pm 1$  SD

Plant: *Lysimachia nummularia* 'Aurea', Exposition: South, DOY: 324

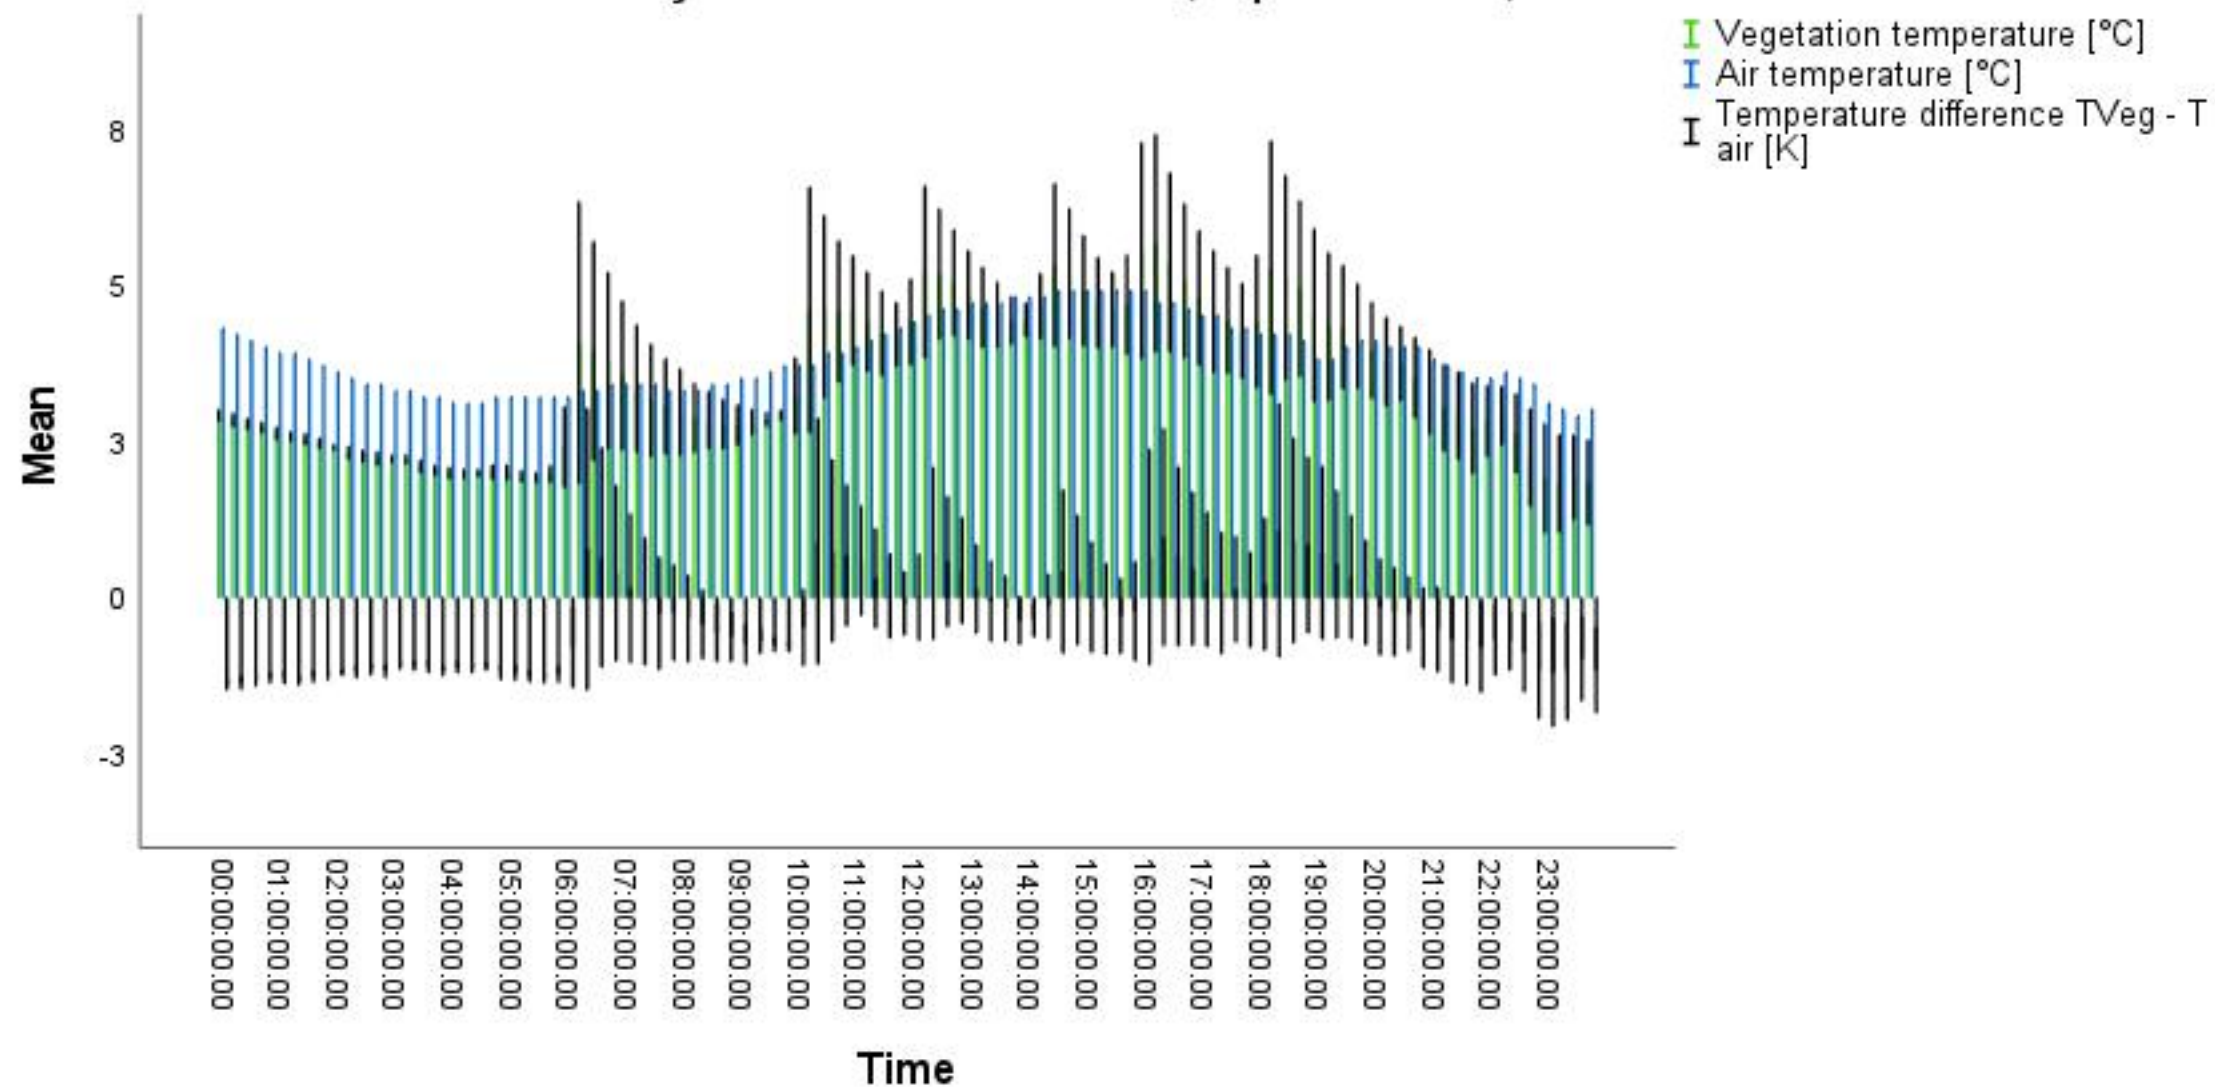

Fehlerbalken: +/- 1 SD



Plant: *Lysimachia nummularia* 'Aurea', Exposition: West, DOY: 254

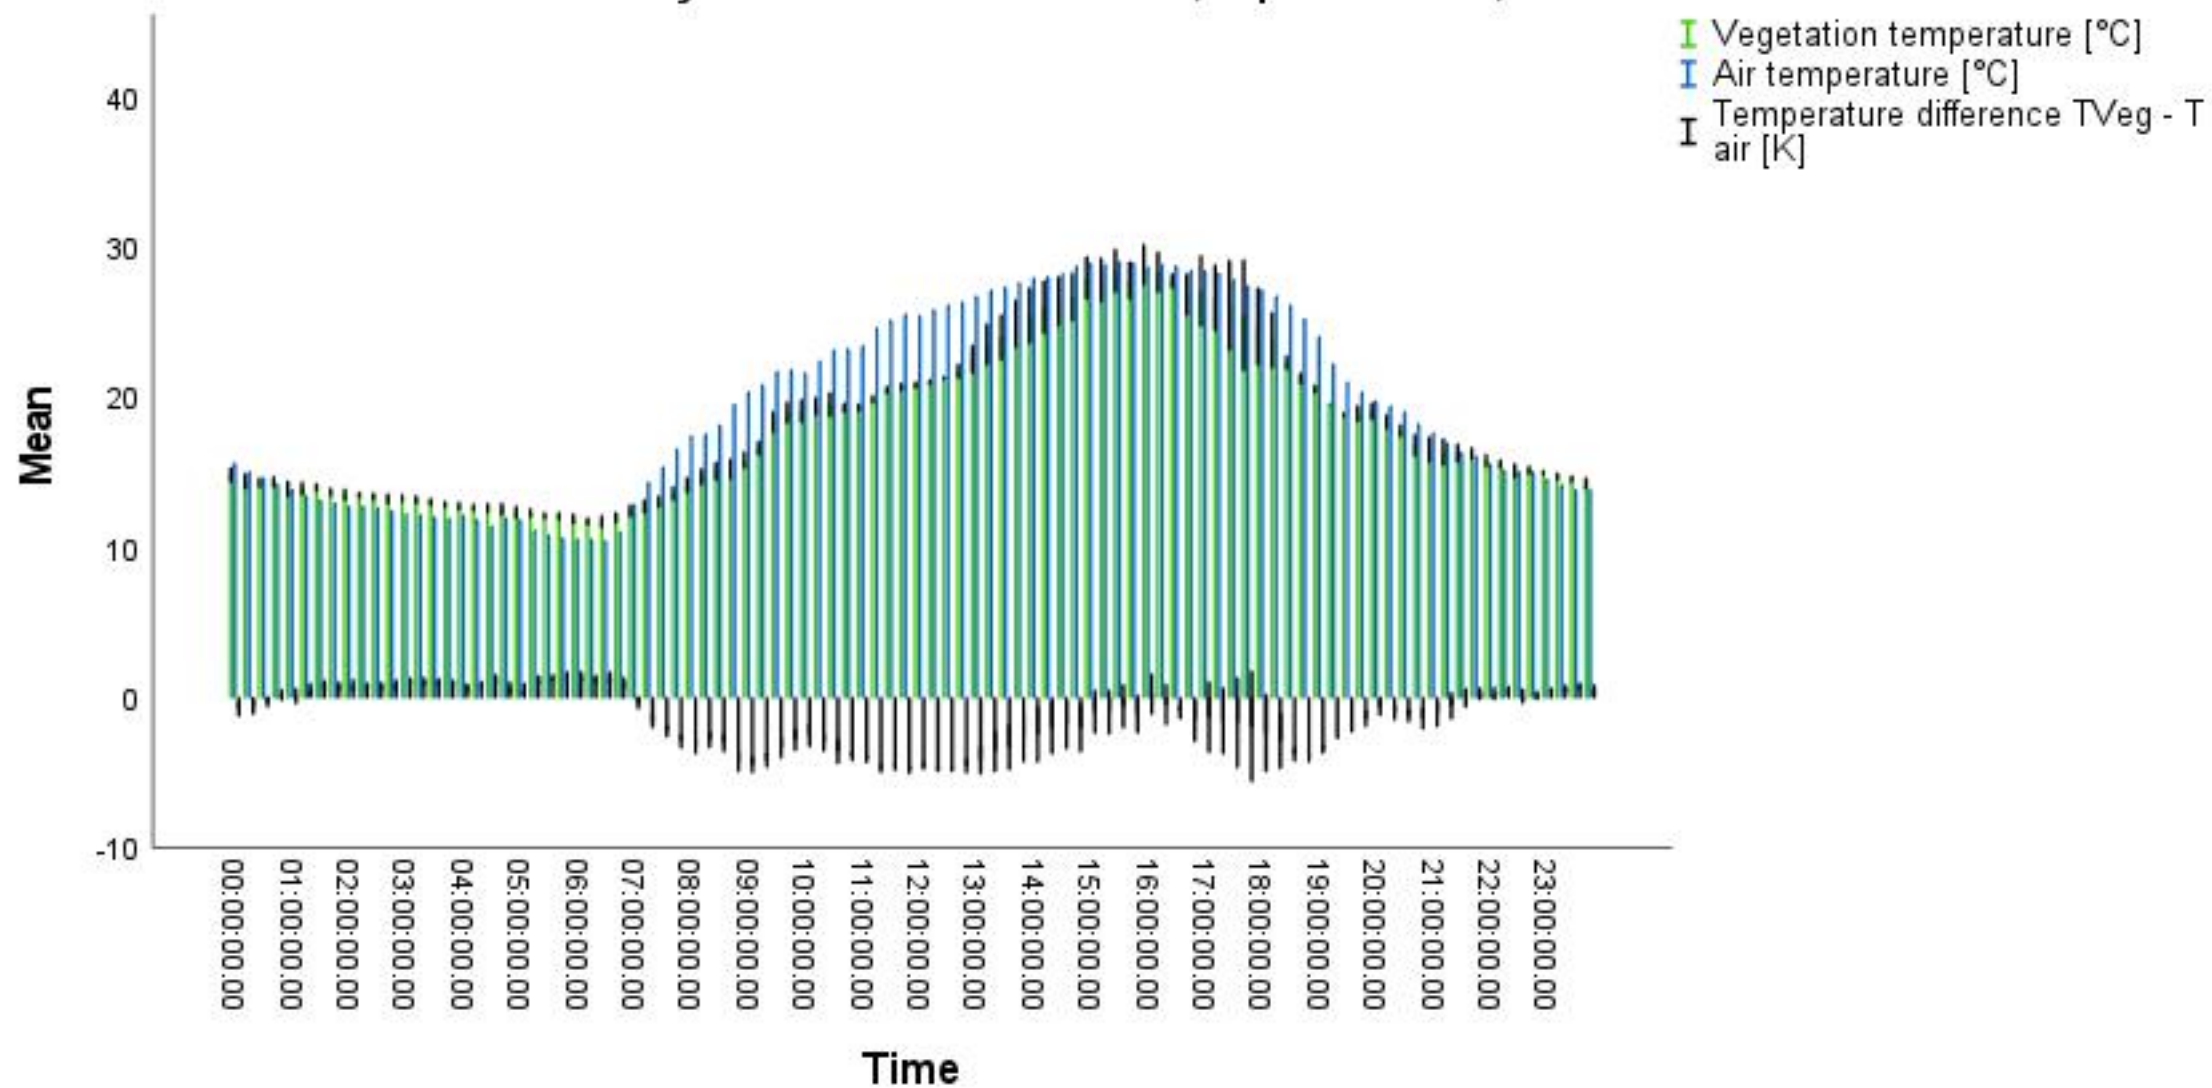

Fehlerbalken:  $\pm 1$  SD

Plant: *Lysimachia nummularia* 'Aurea', Exposition: West, DOY: 255

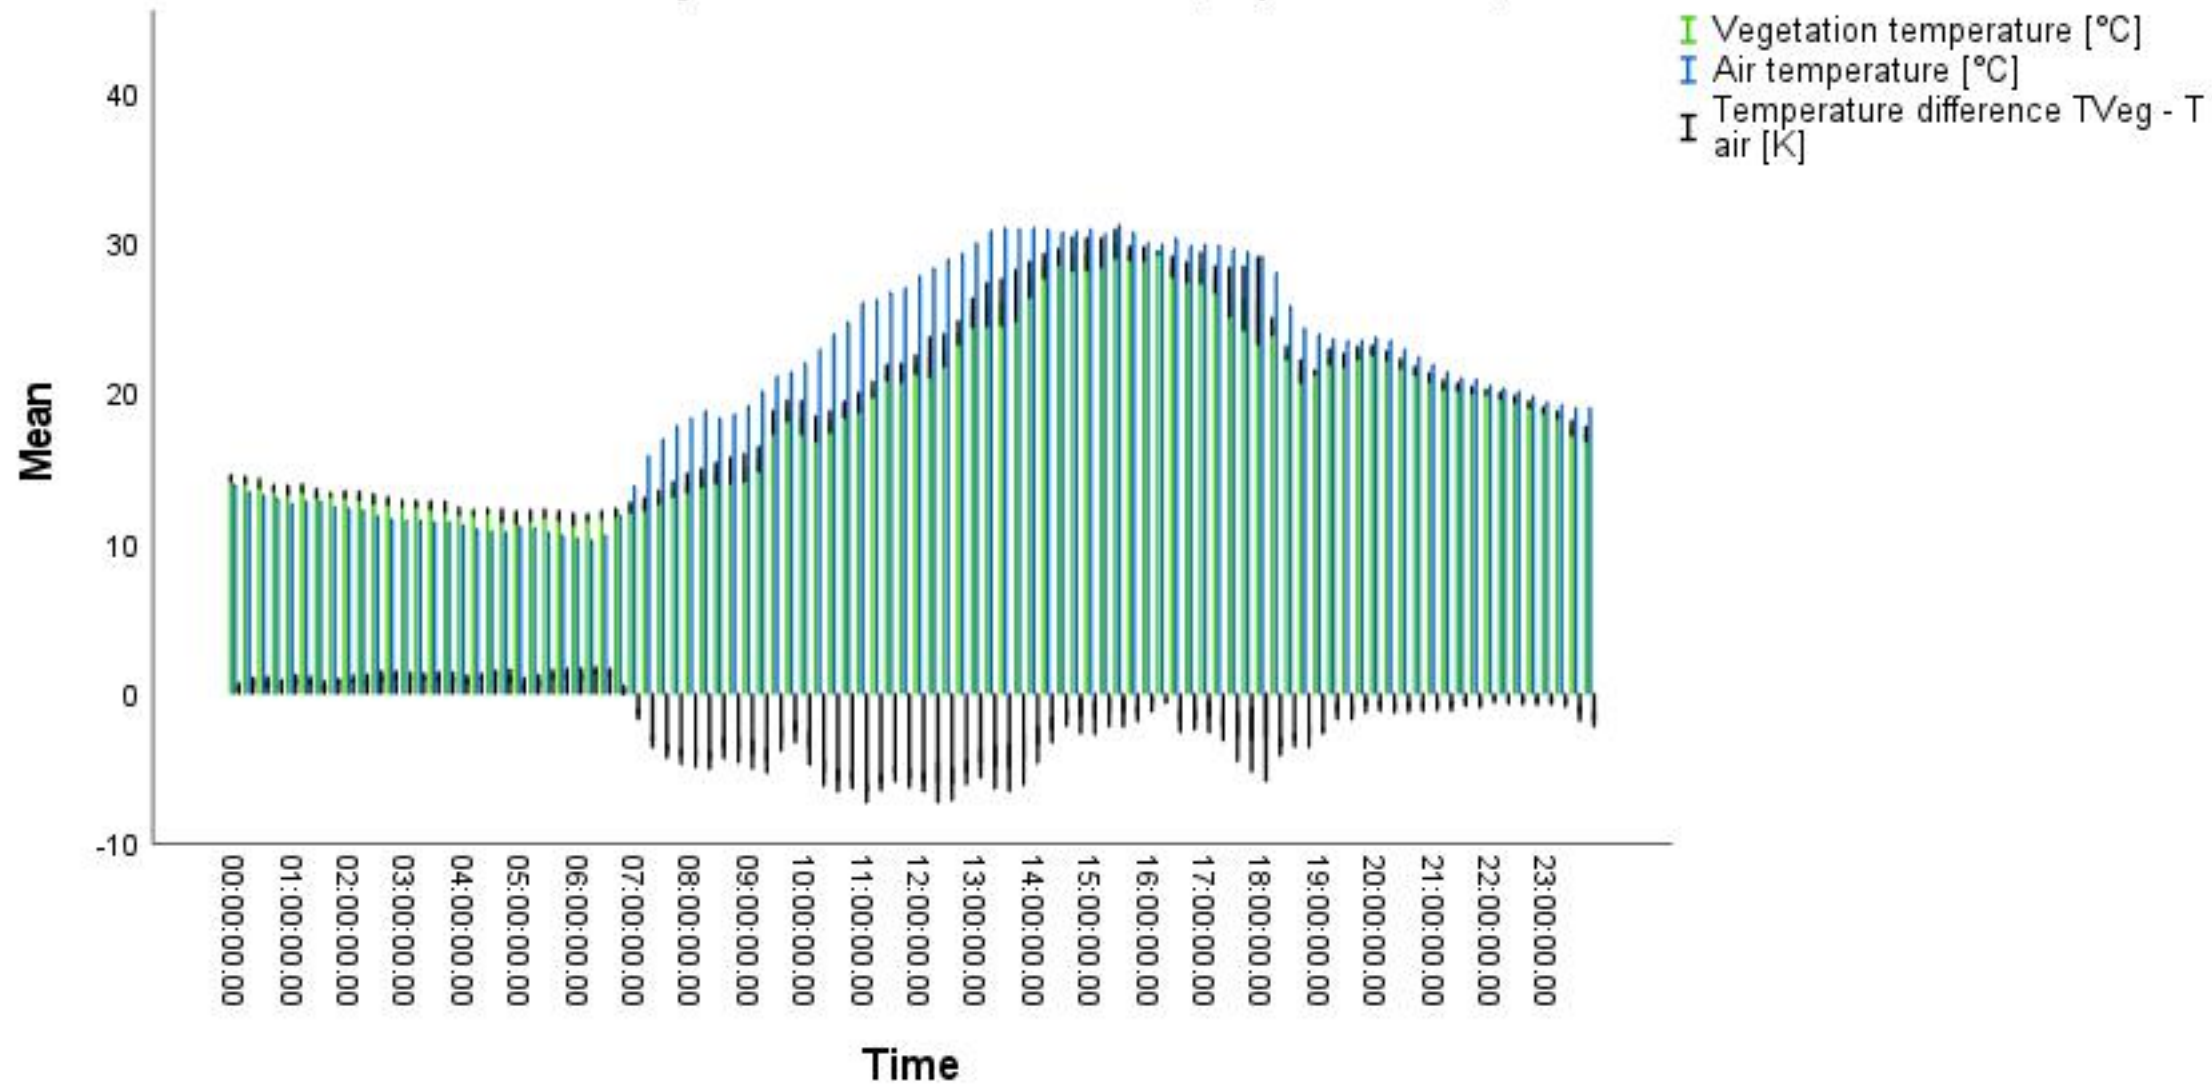

Fehlerbalken: +/- 1 SD

Plant: *Ophiopogon japonicus* 'Sparkler', Exposition: North, DOY: 318

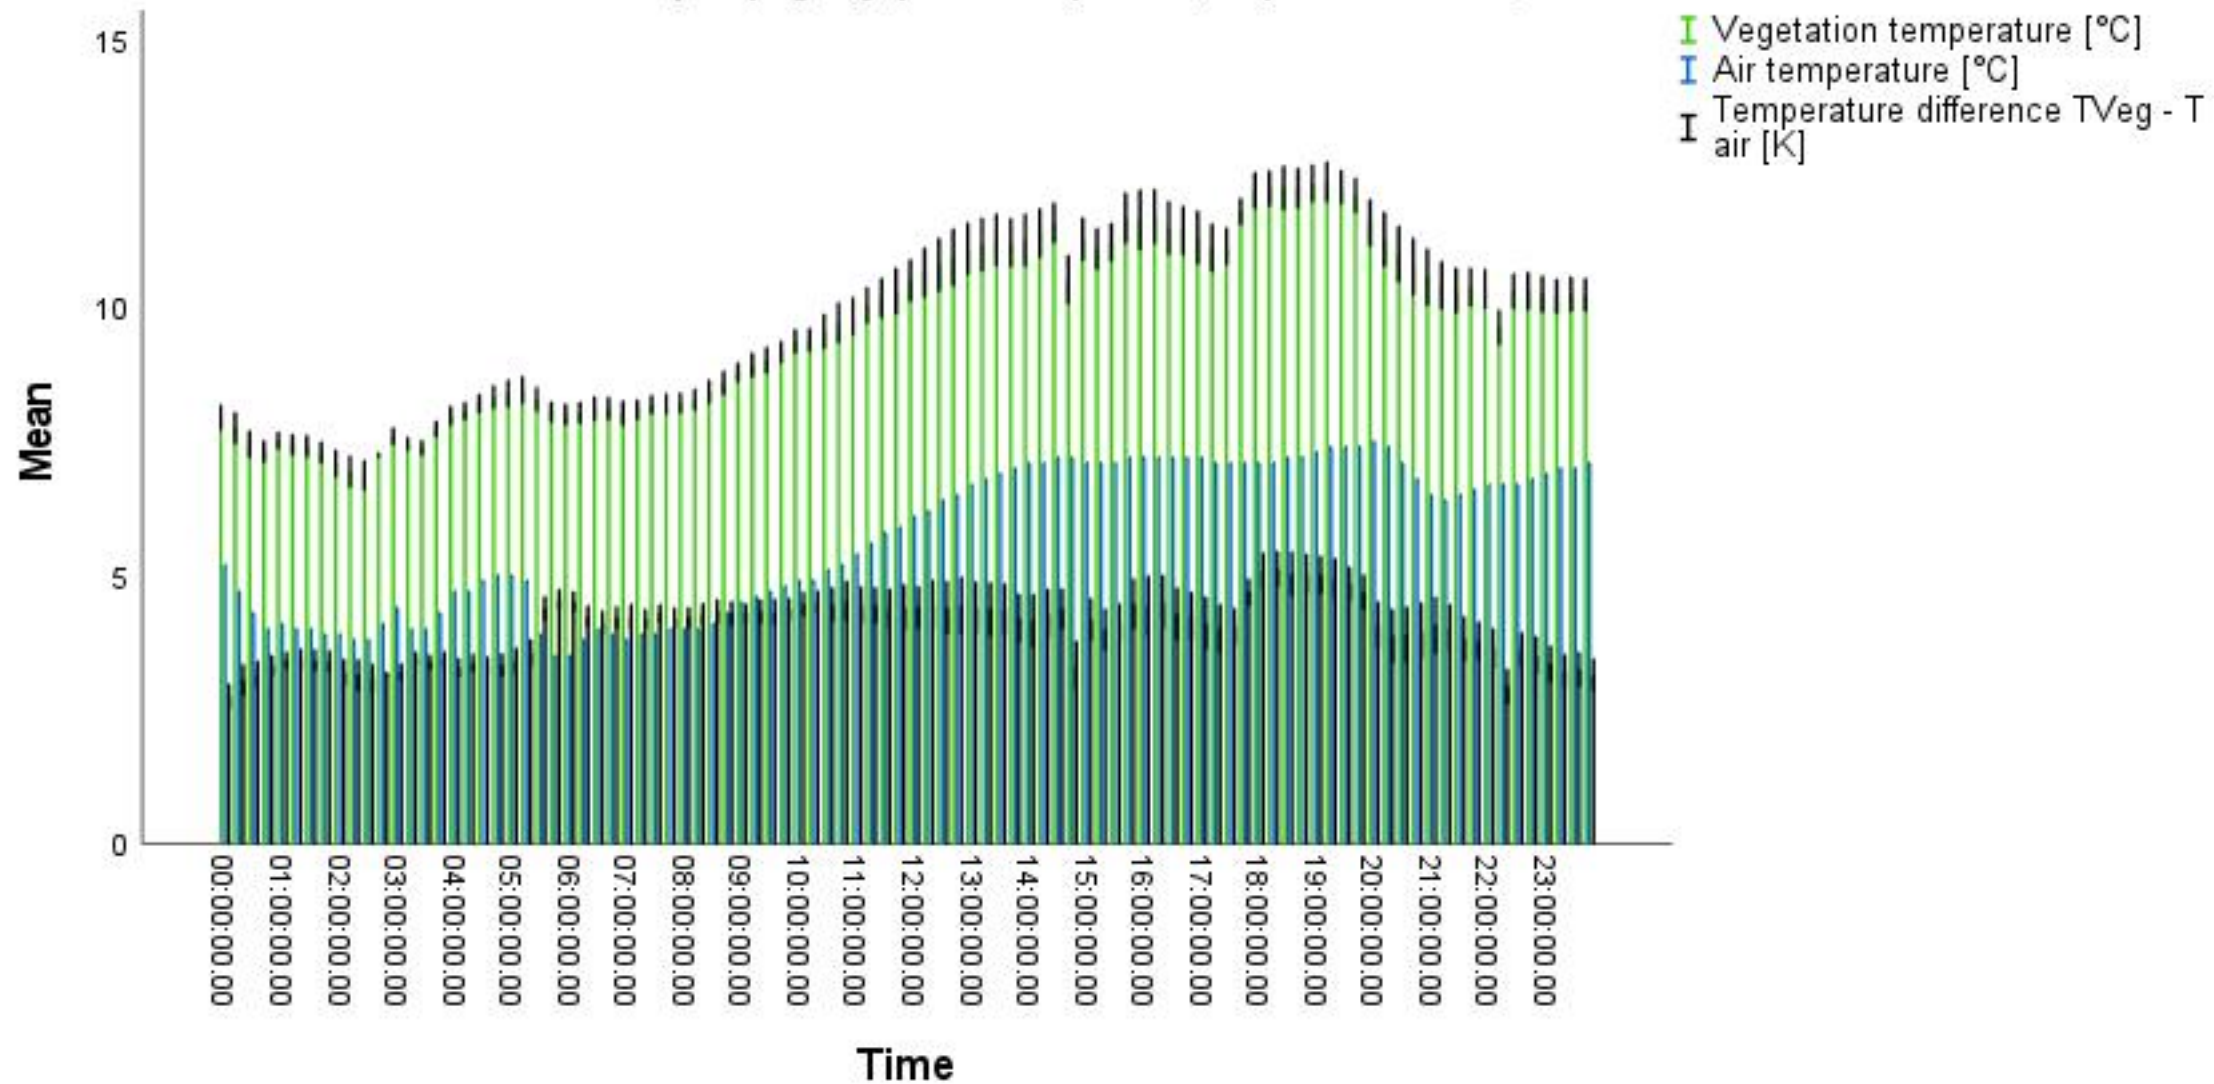

Fehlerbalken: +/- 1 SD

Plant: *Ophiopogon japonicus* 'Sparkler', Exposition: North, DOY: 319

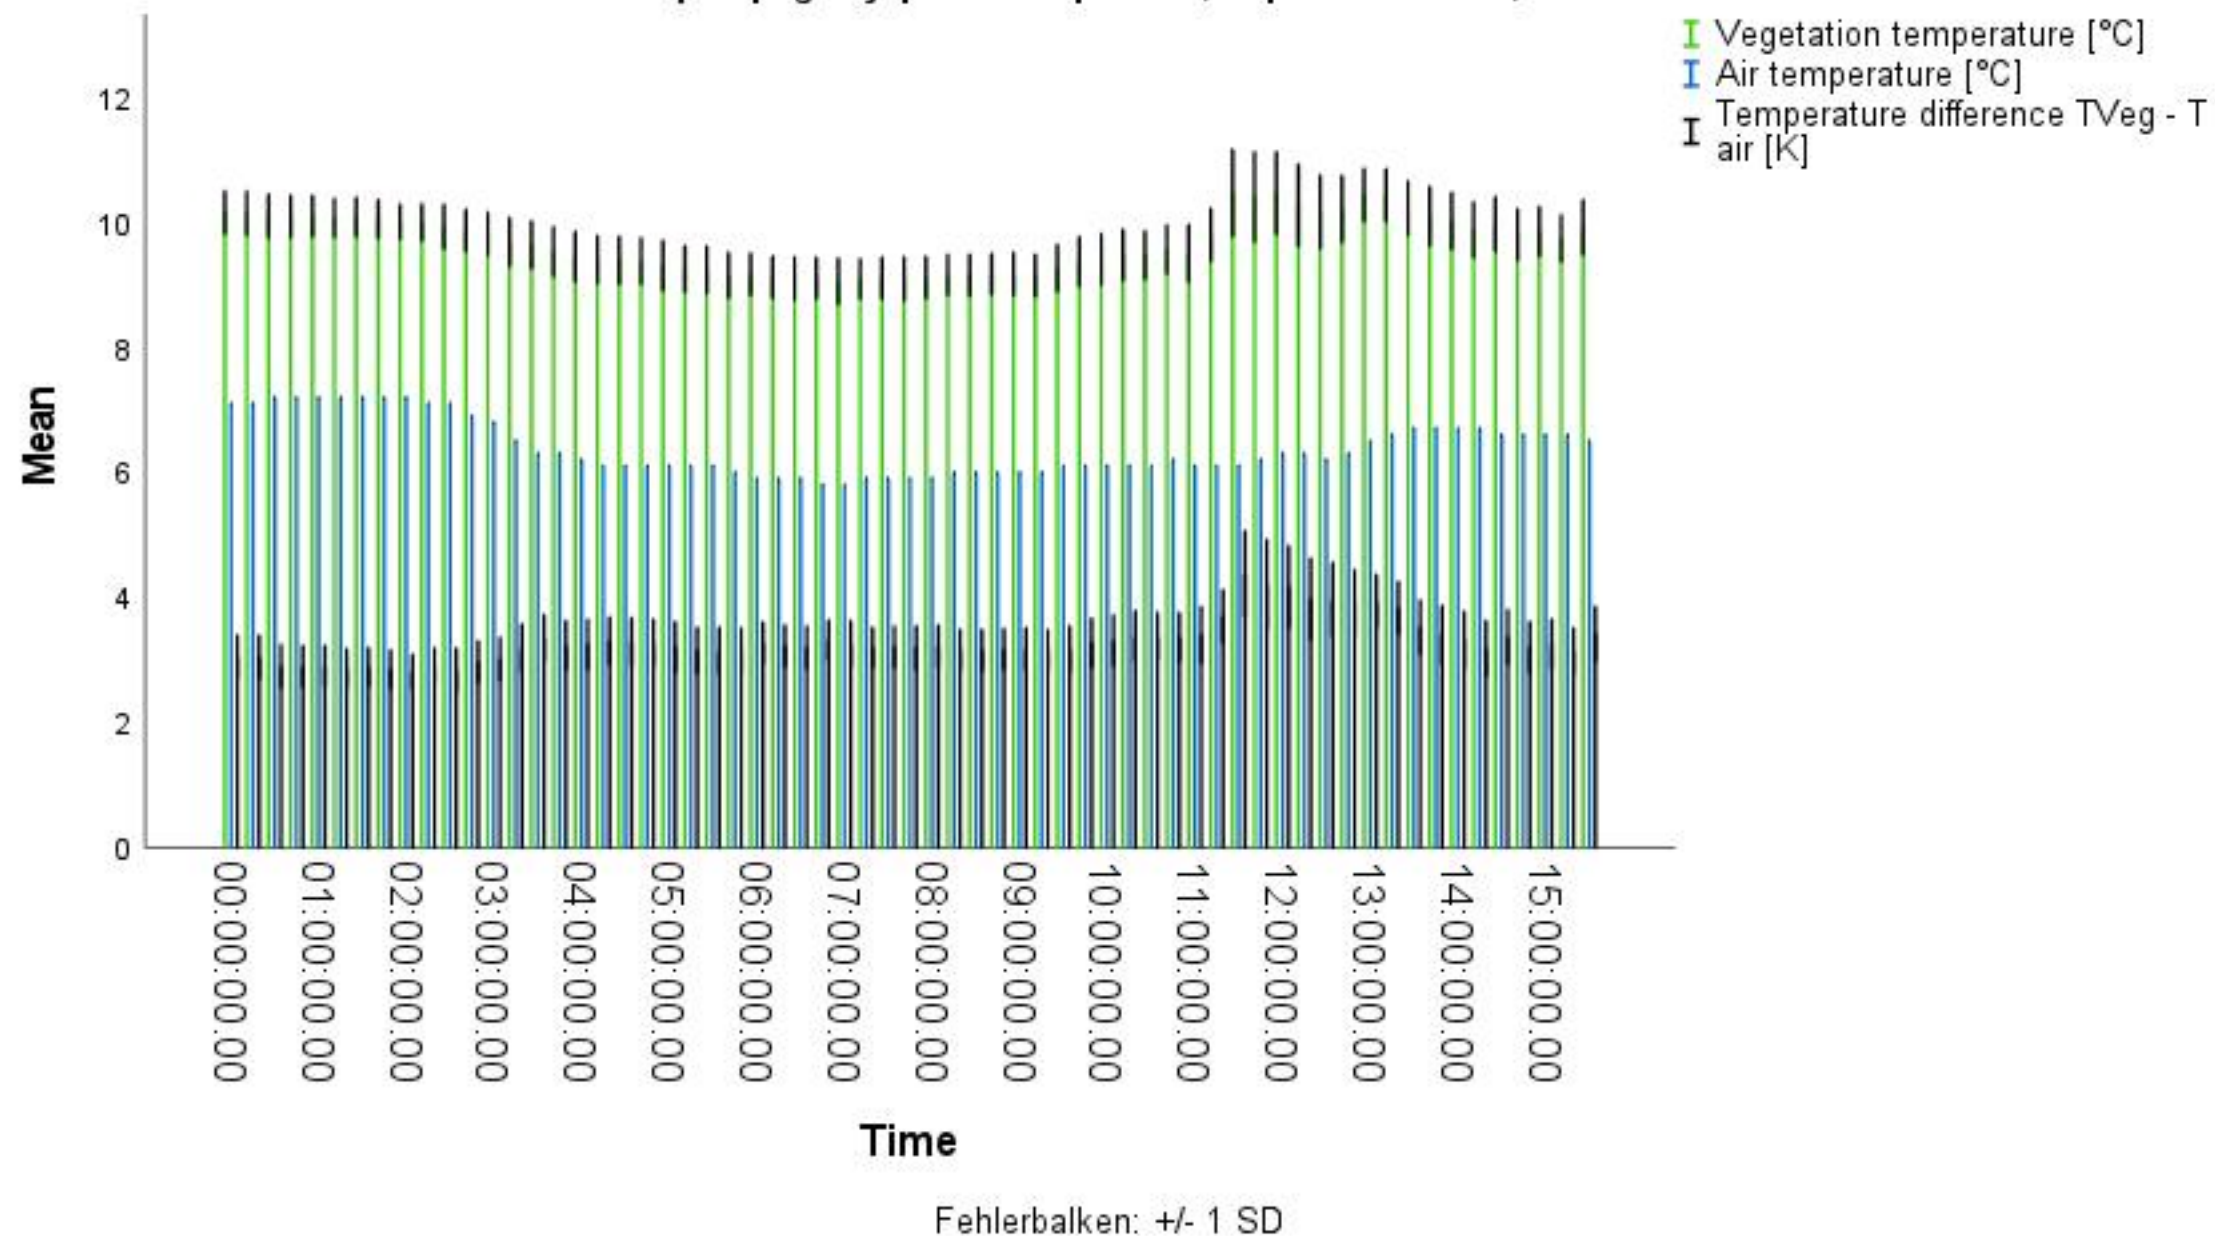

Plant: *Ophiopogon planiscapus*, Exposition: East, DOY: 301

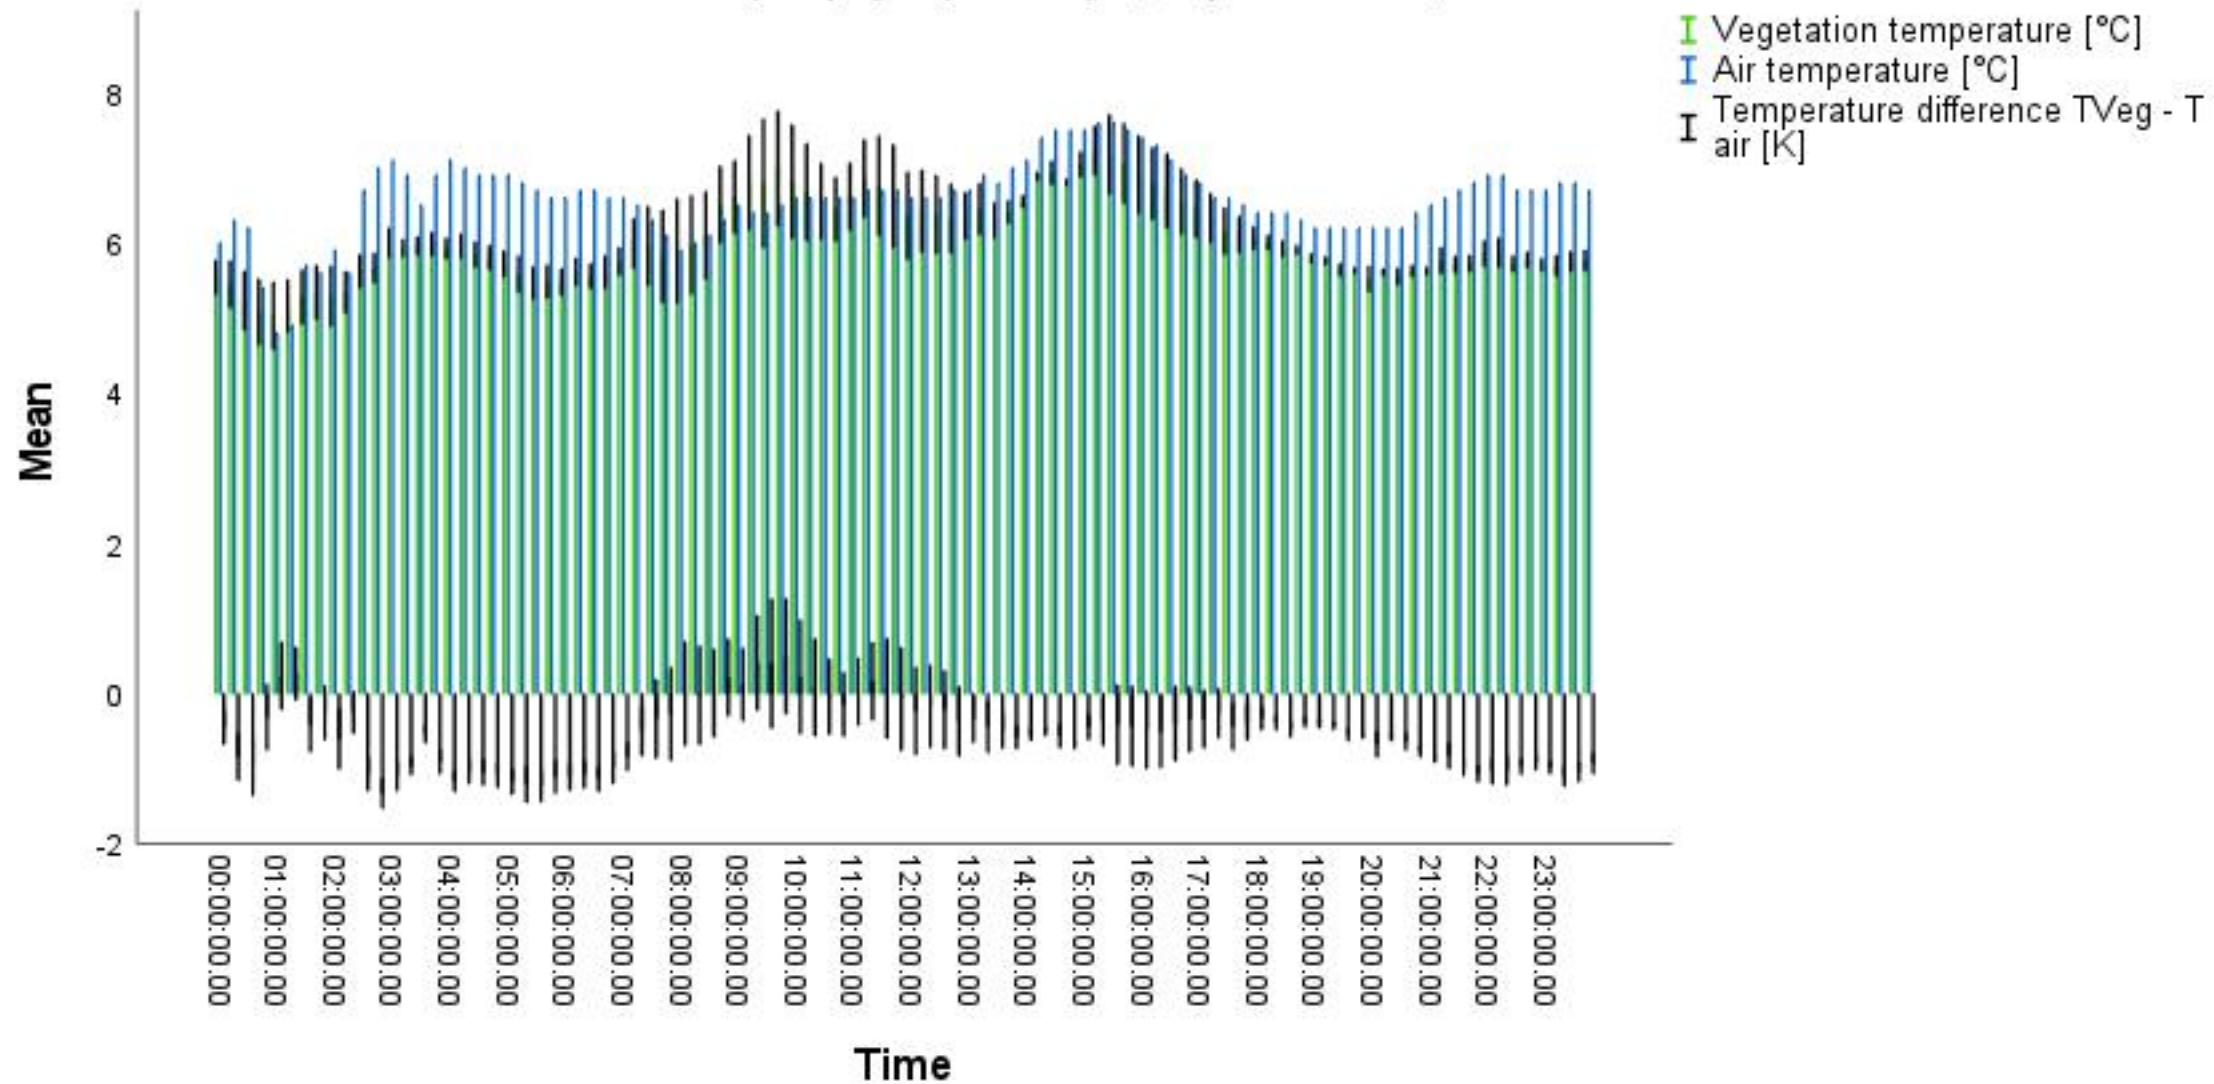



Plant: *Ophiopogon planiscapus*, Exposition: East, DOY: 302

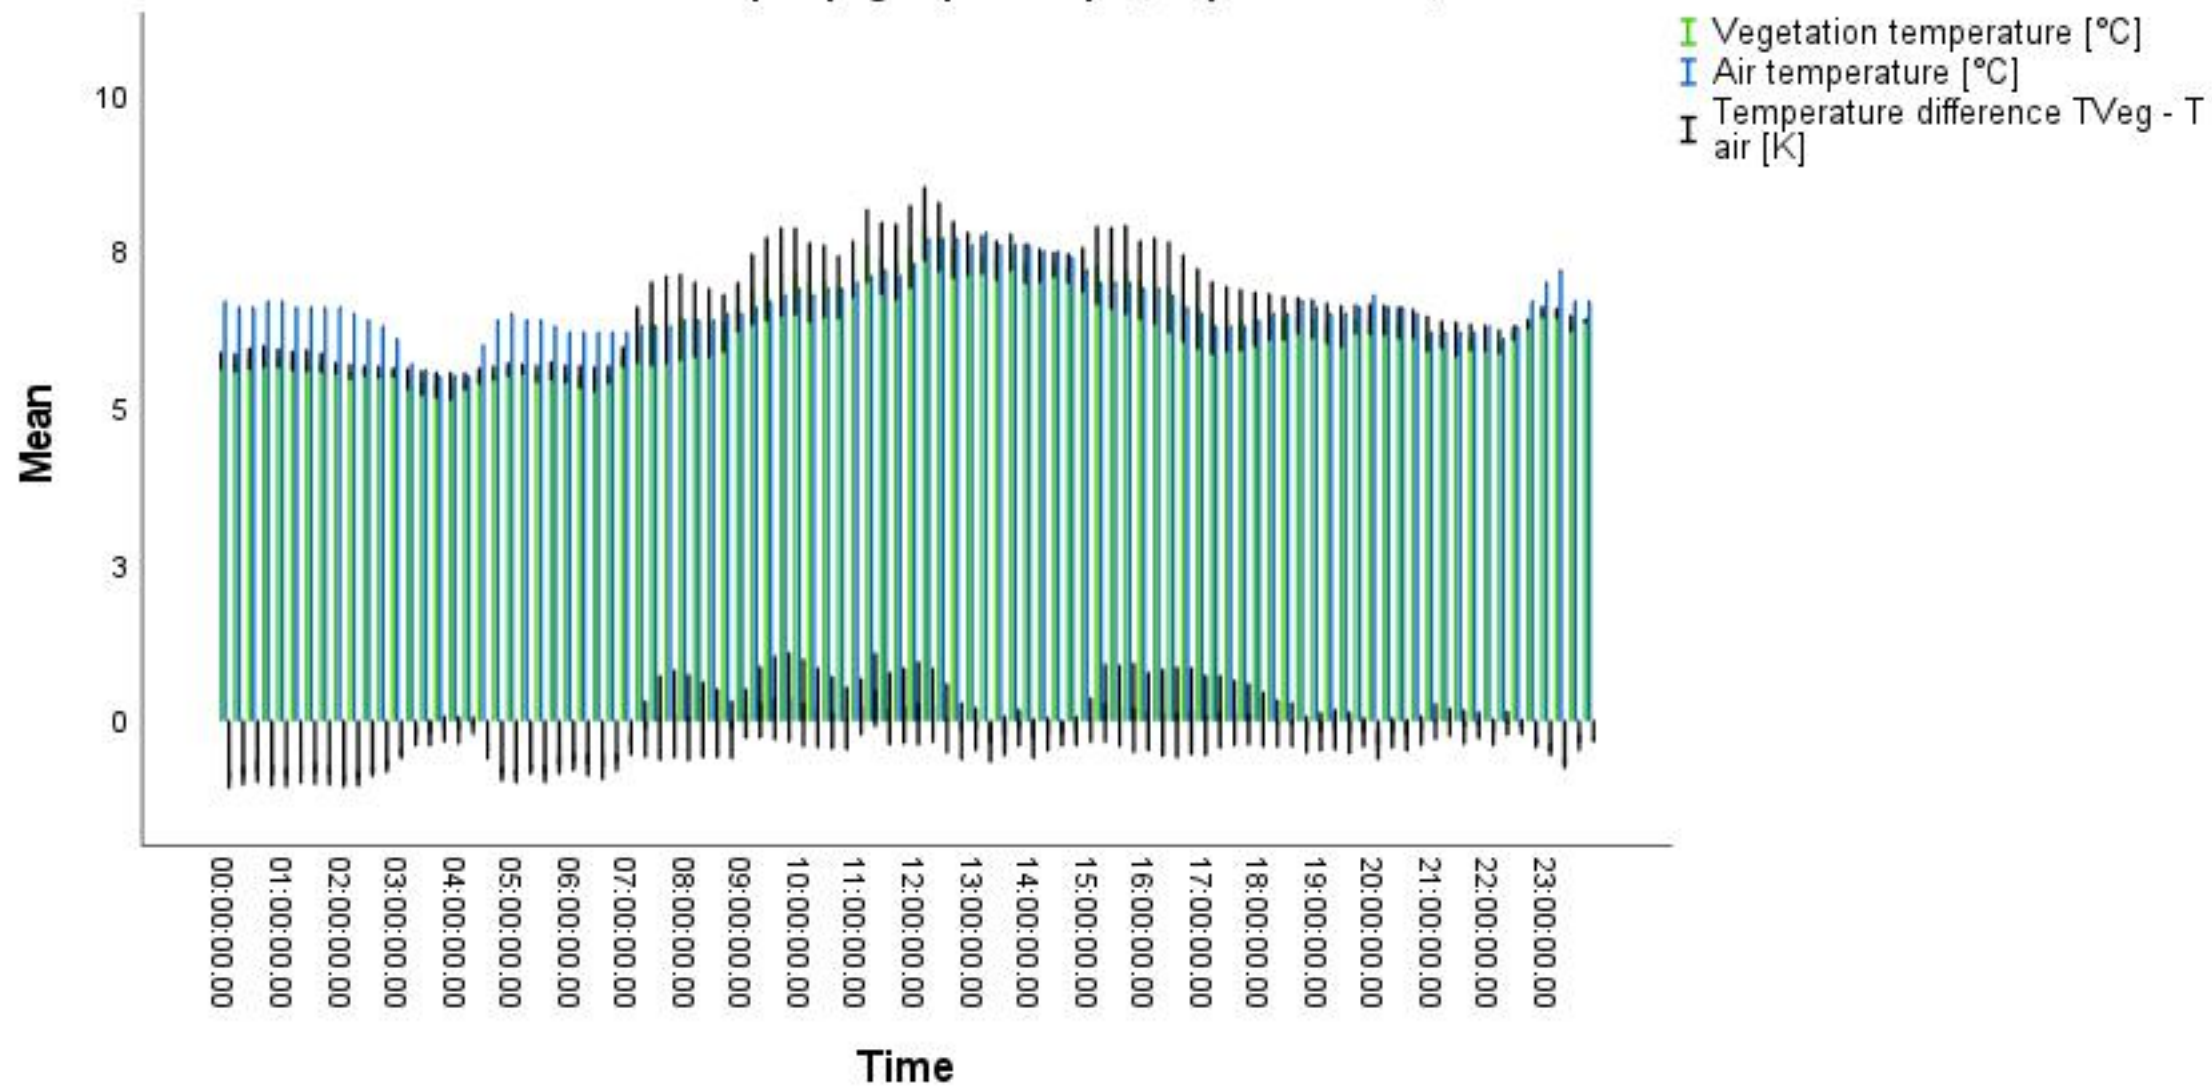

Fehlerbalken: +/- 1 SD

Plant: *Ophiopogon planiscapus*, Exposition: North, DOY: 323

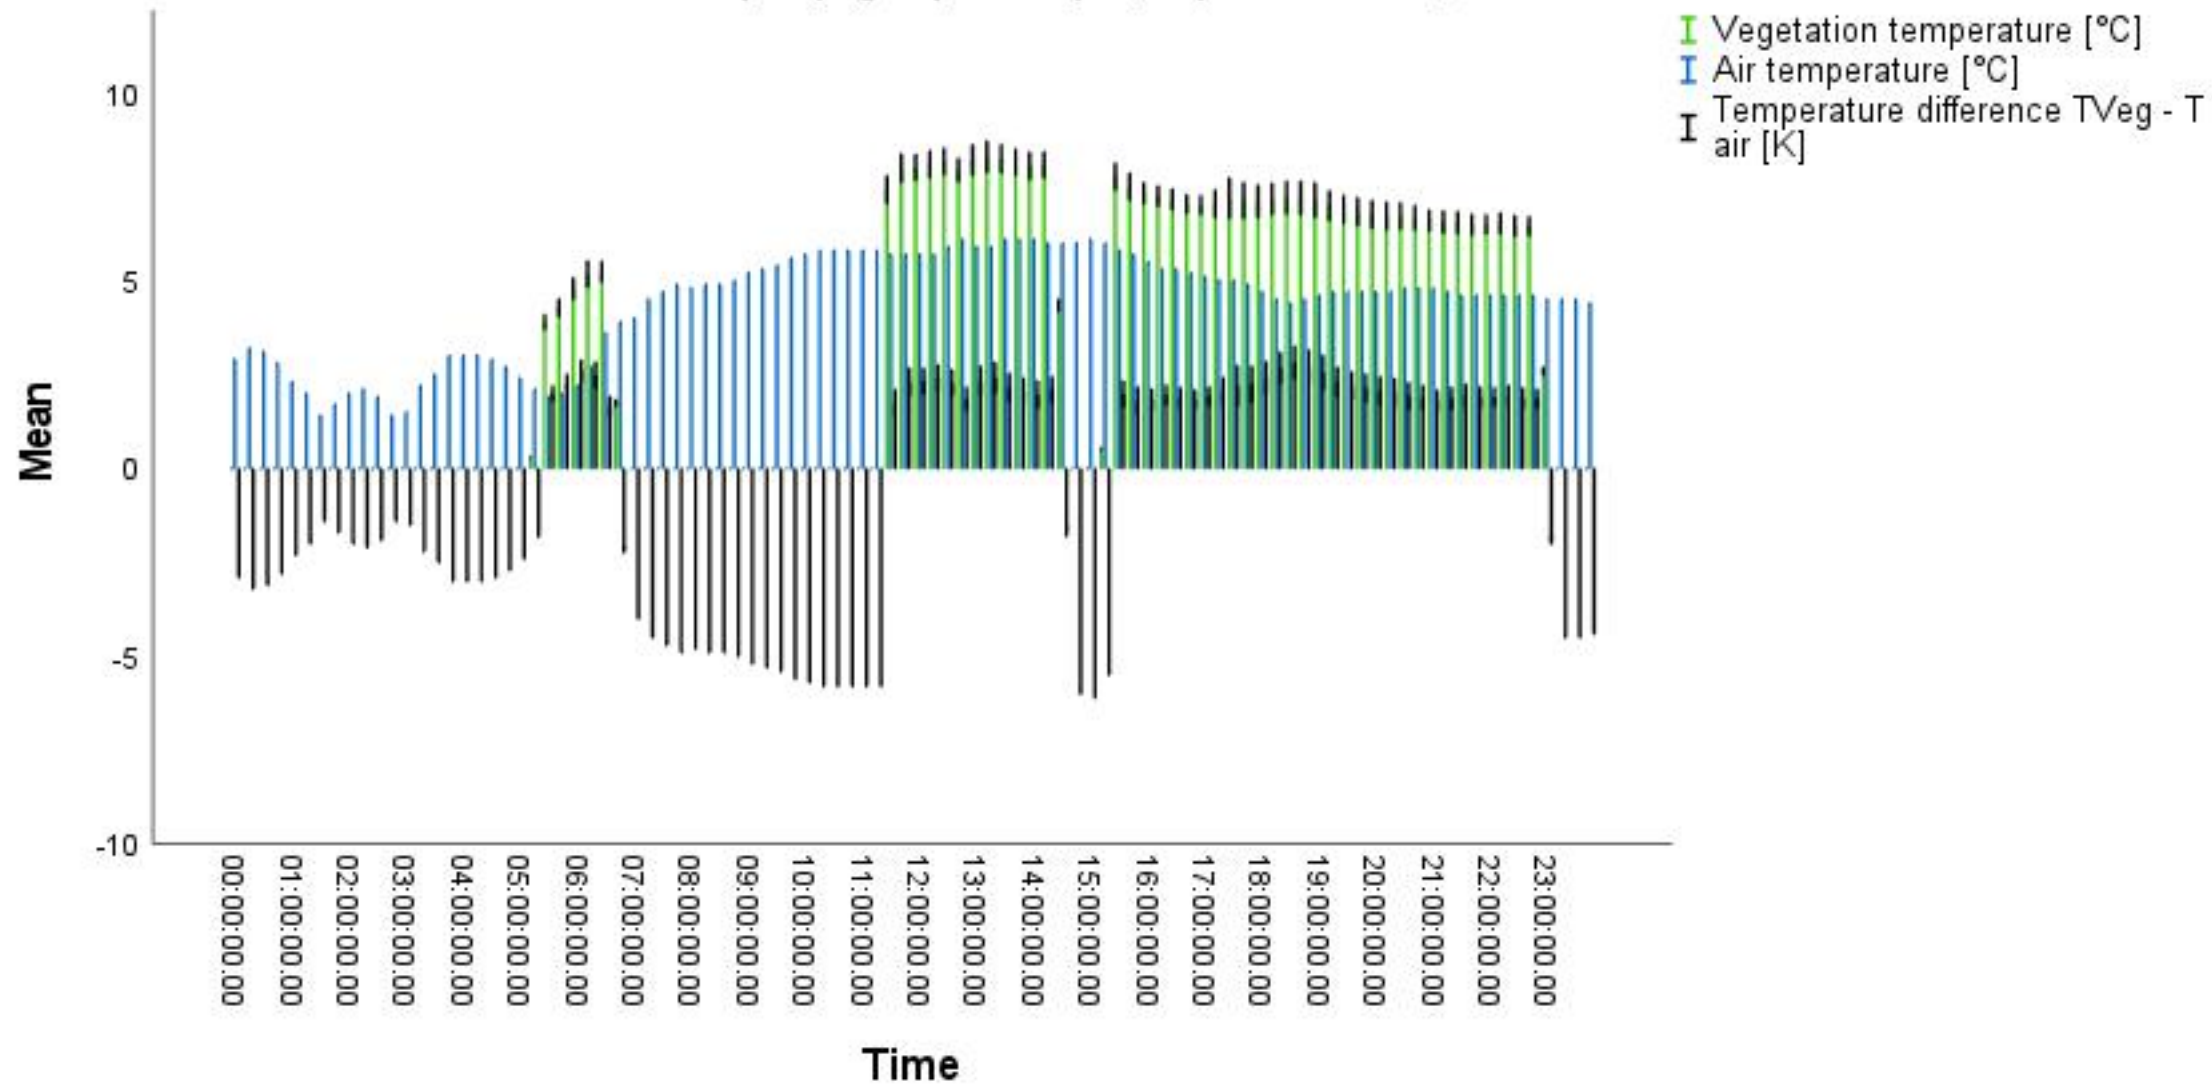

Fehlerbalken: +/- 1 SD

Plant: *Ophiopogon planiscapus*, Exposition: North, DOY: 324

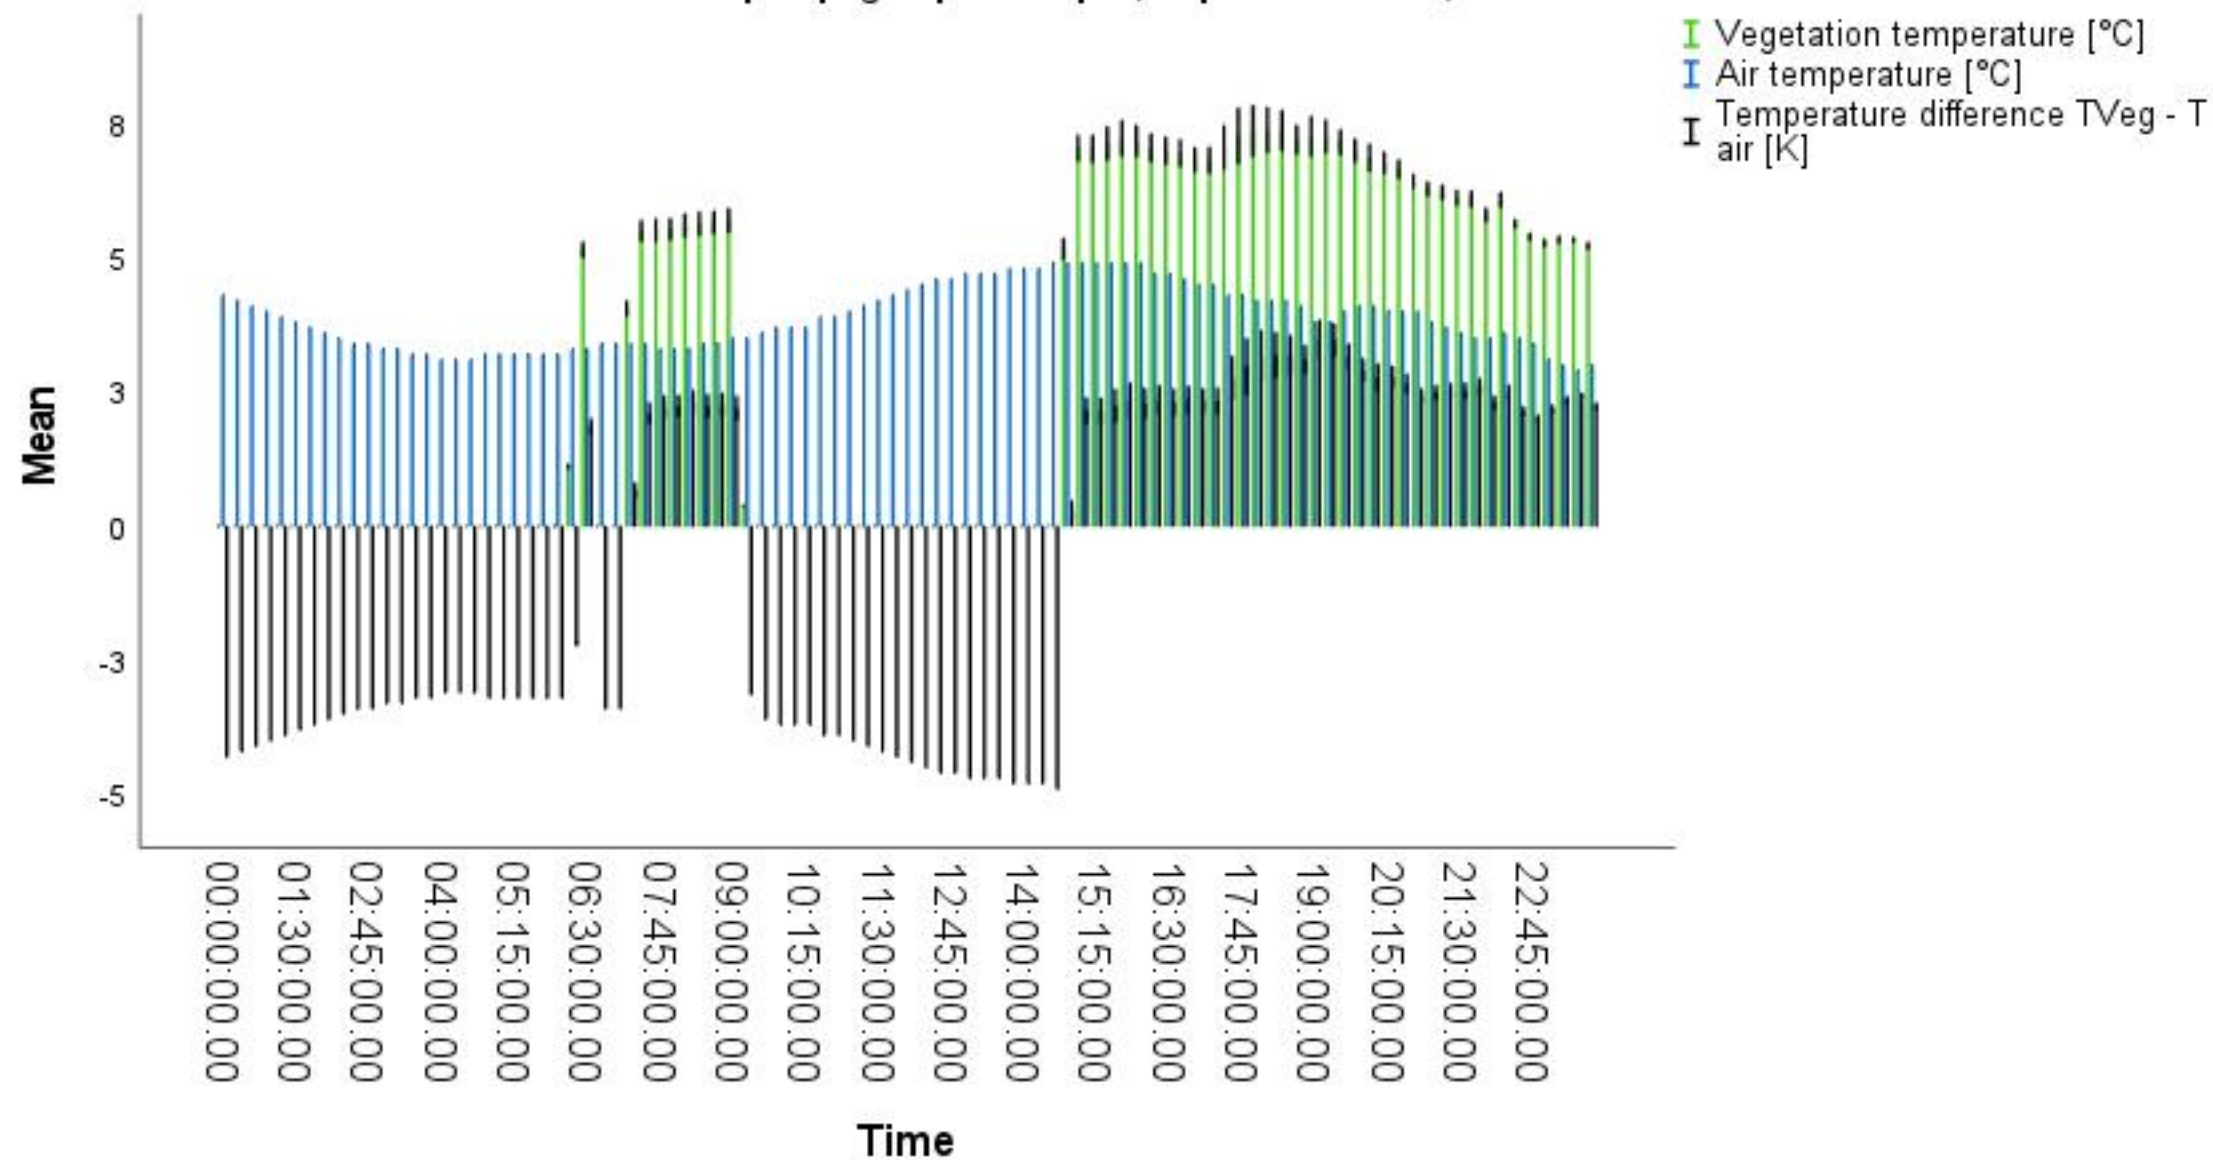

Fehlerbalken: +/- 1 SD

Plant: *Ophiopogon planiscapus*, Exposition: West, DOY: 301

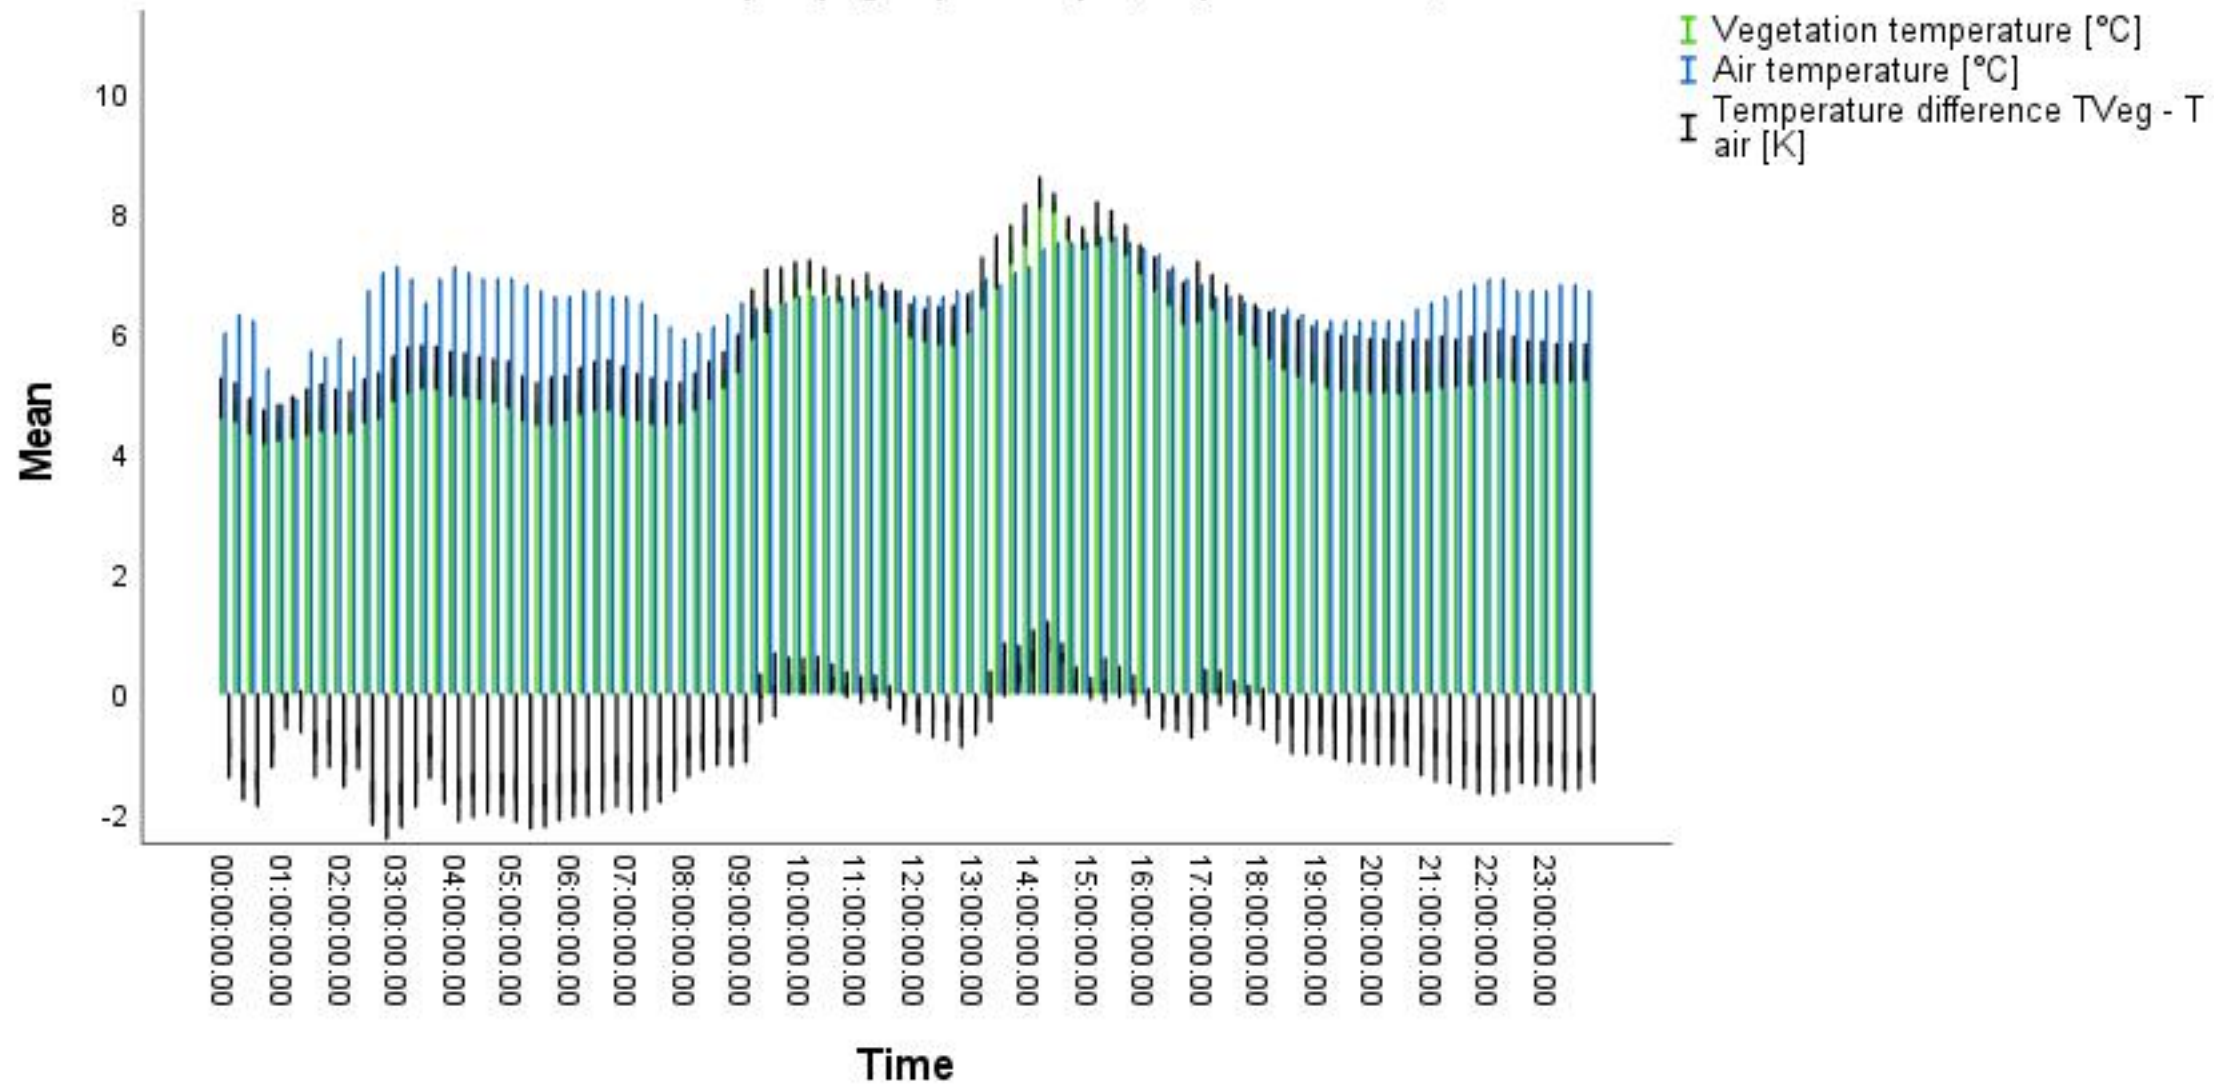

Fehlerbalken: +/- 1 SD

Plant: *Ophiopogon planiscapus*, Exposition: West, DOY: 302

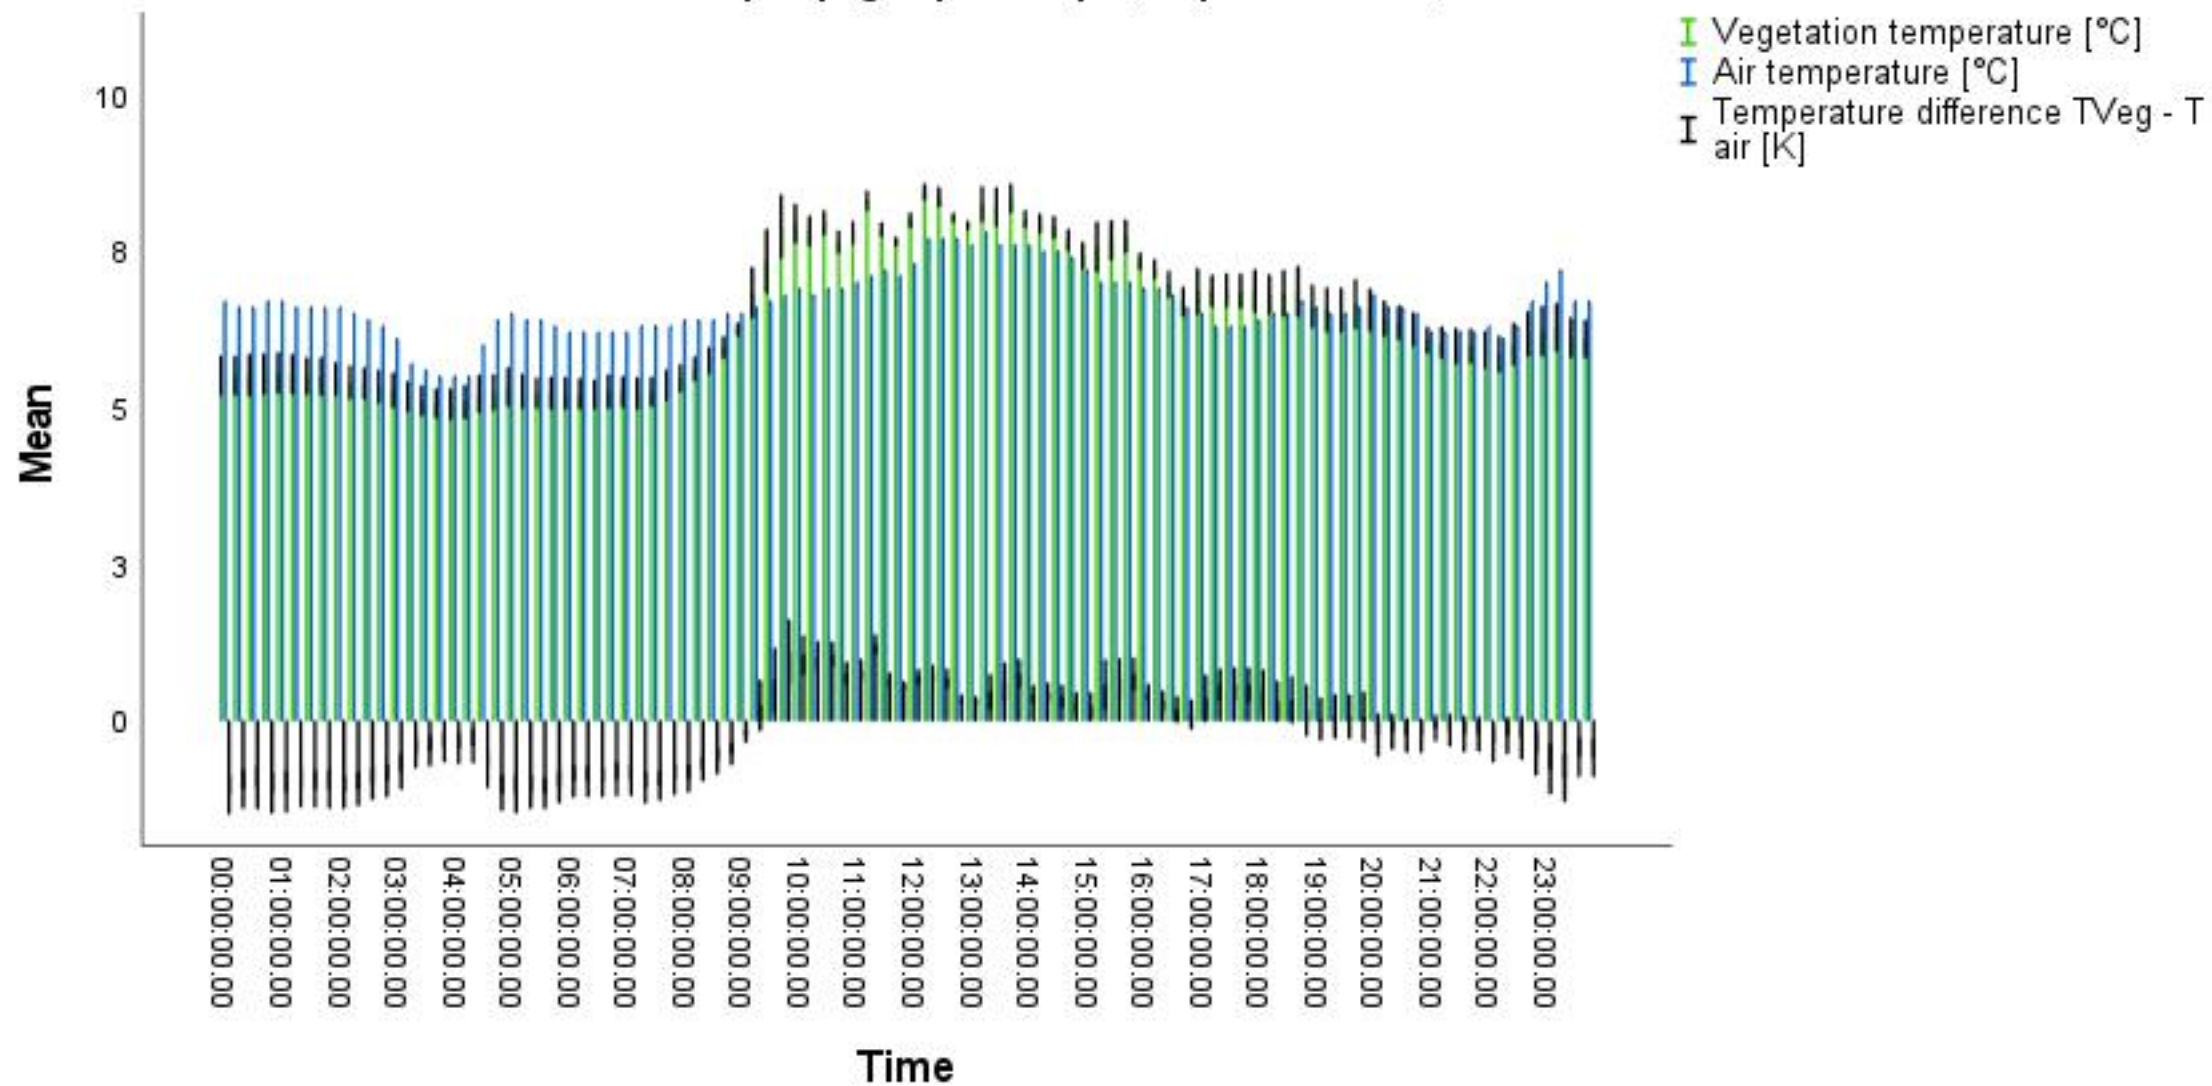

Fehlerbalken:  $\pm 1$  SD



Plant: *Pachysandra terminalis*, Exposition: East, DOY: 310

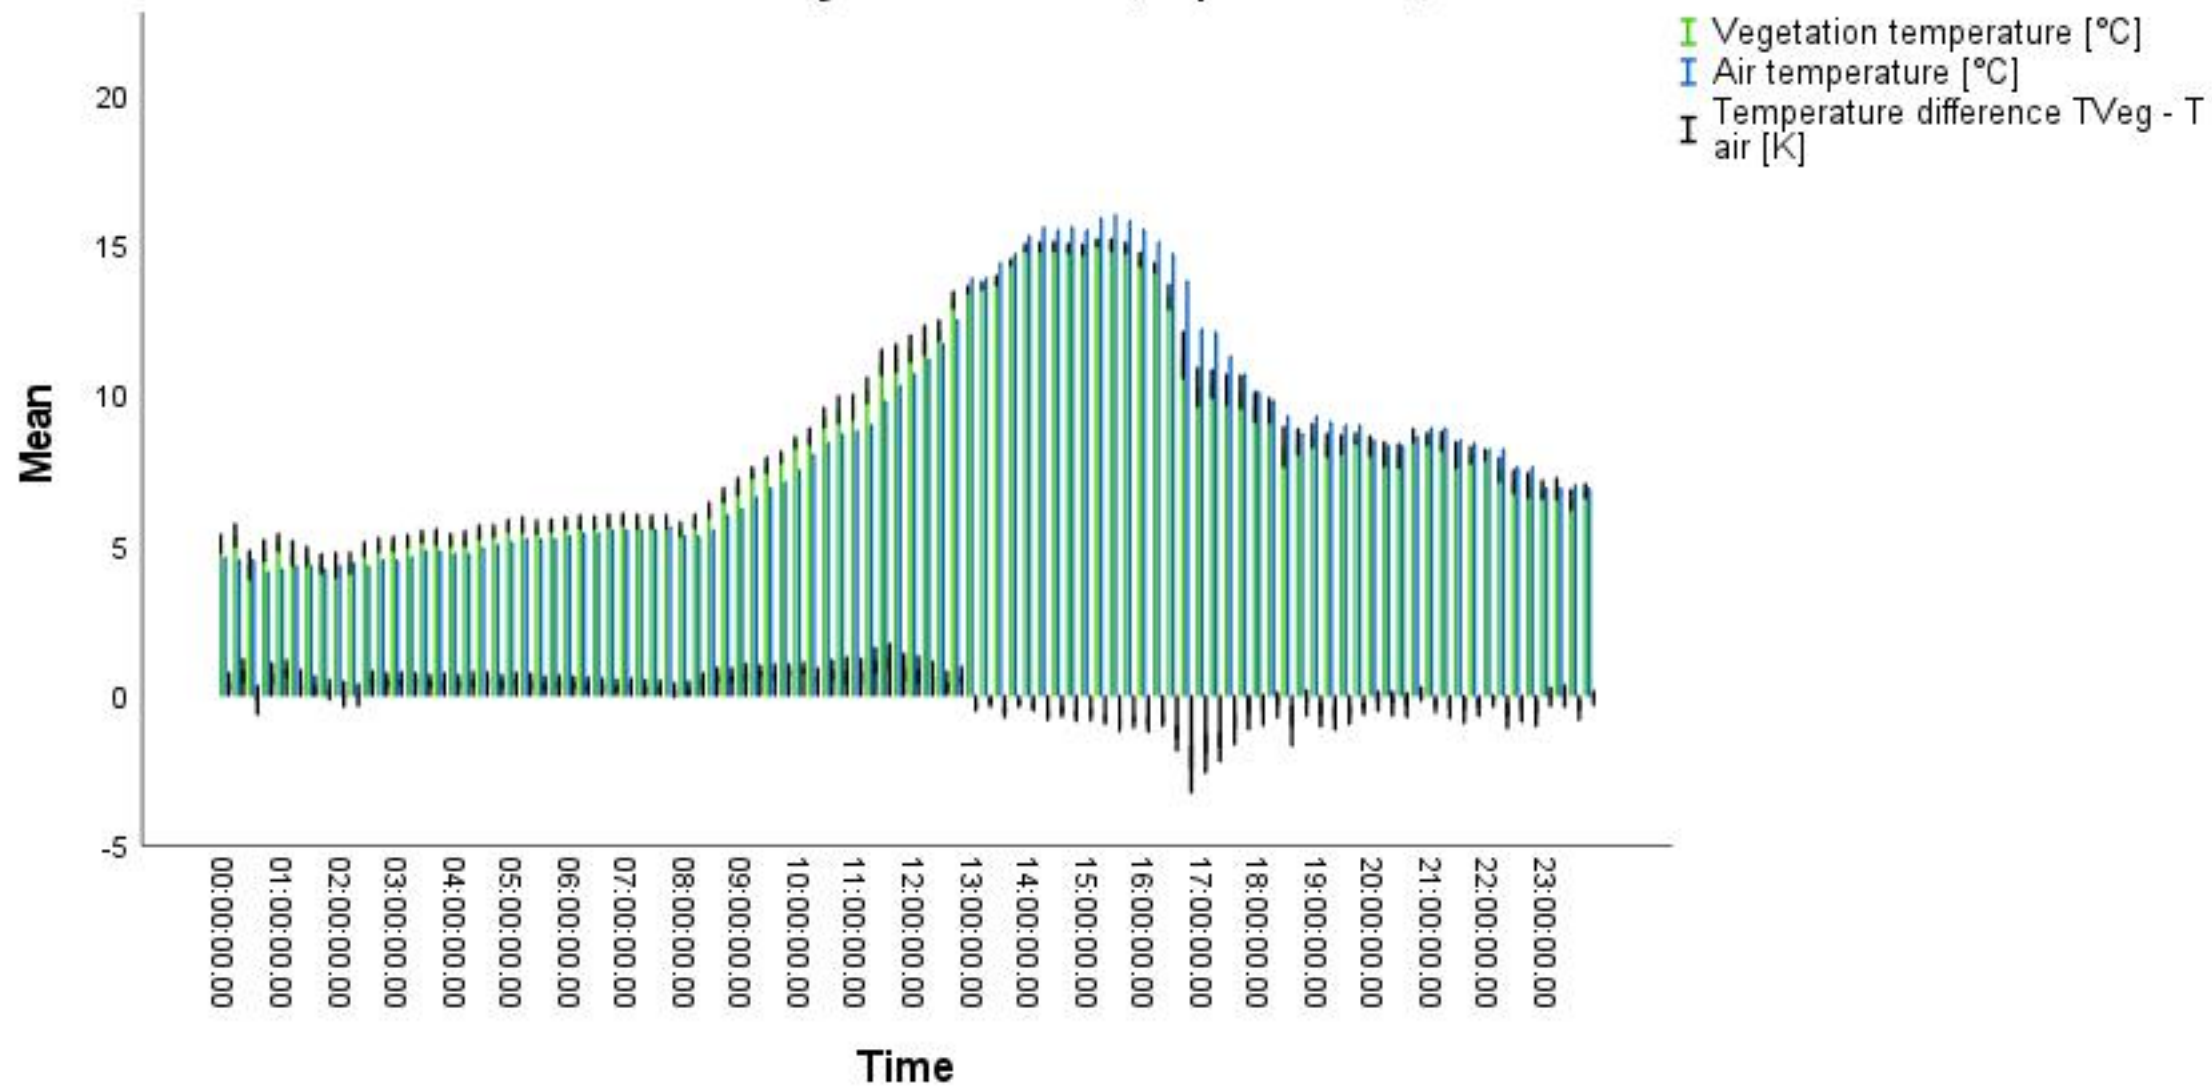

Fehlerbalken: +/- 1 SD

Plant: *Pachysandra terminalis*, Exposition: East, DOY: 311

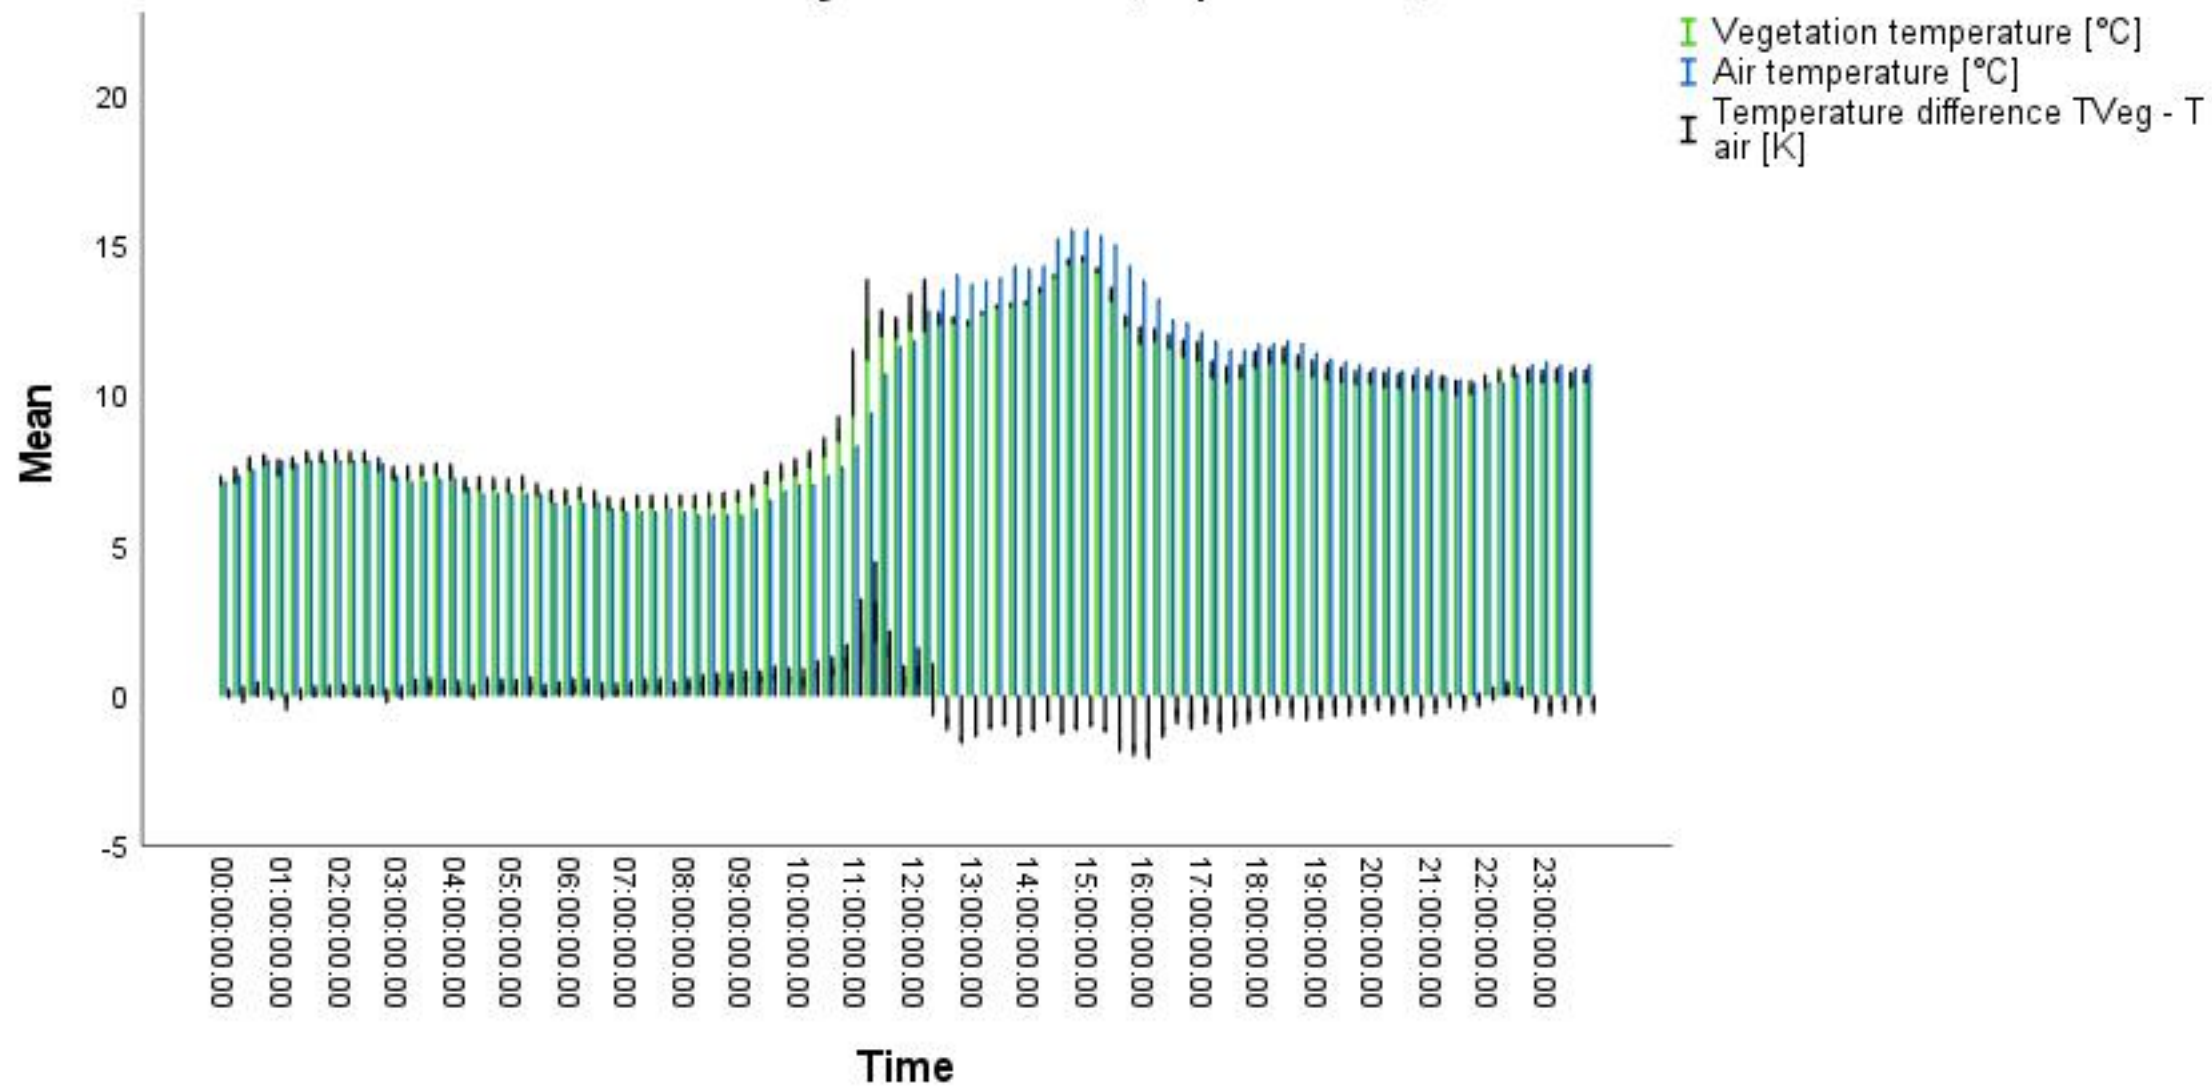

Fehlerbalken:  $\pm 1$  SD

Plant: *Pachysandra terminalis*, Exposition: West, DOY: 310

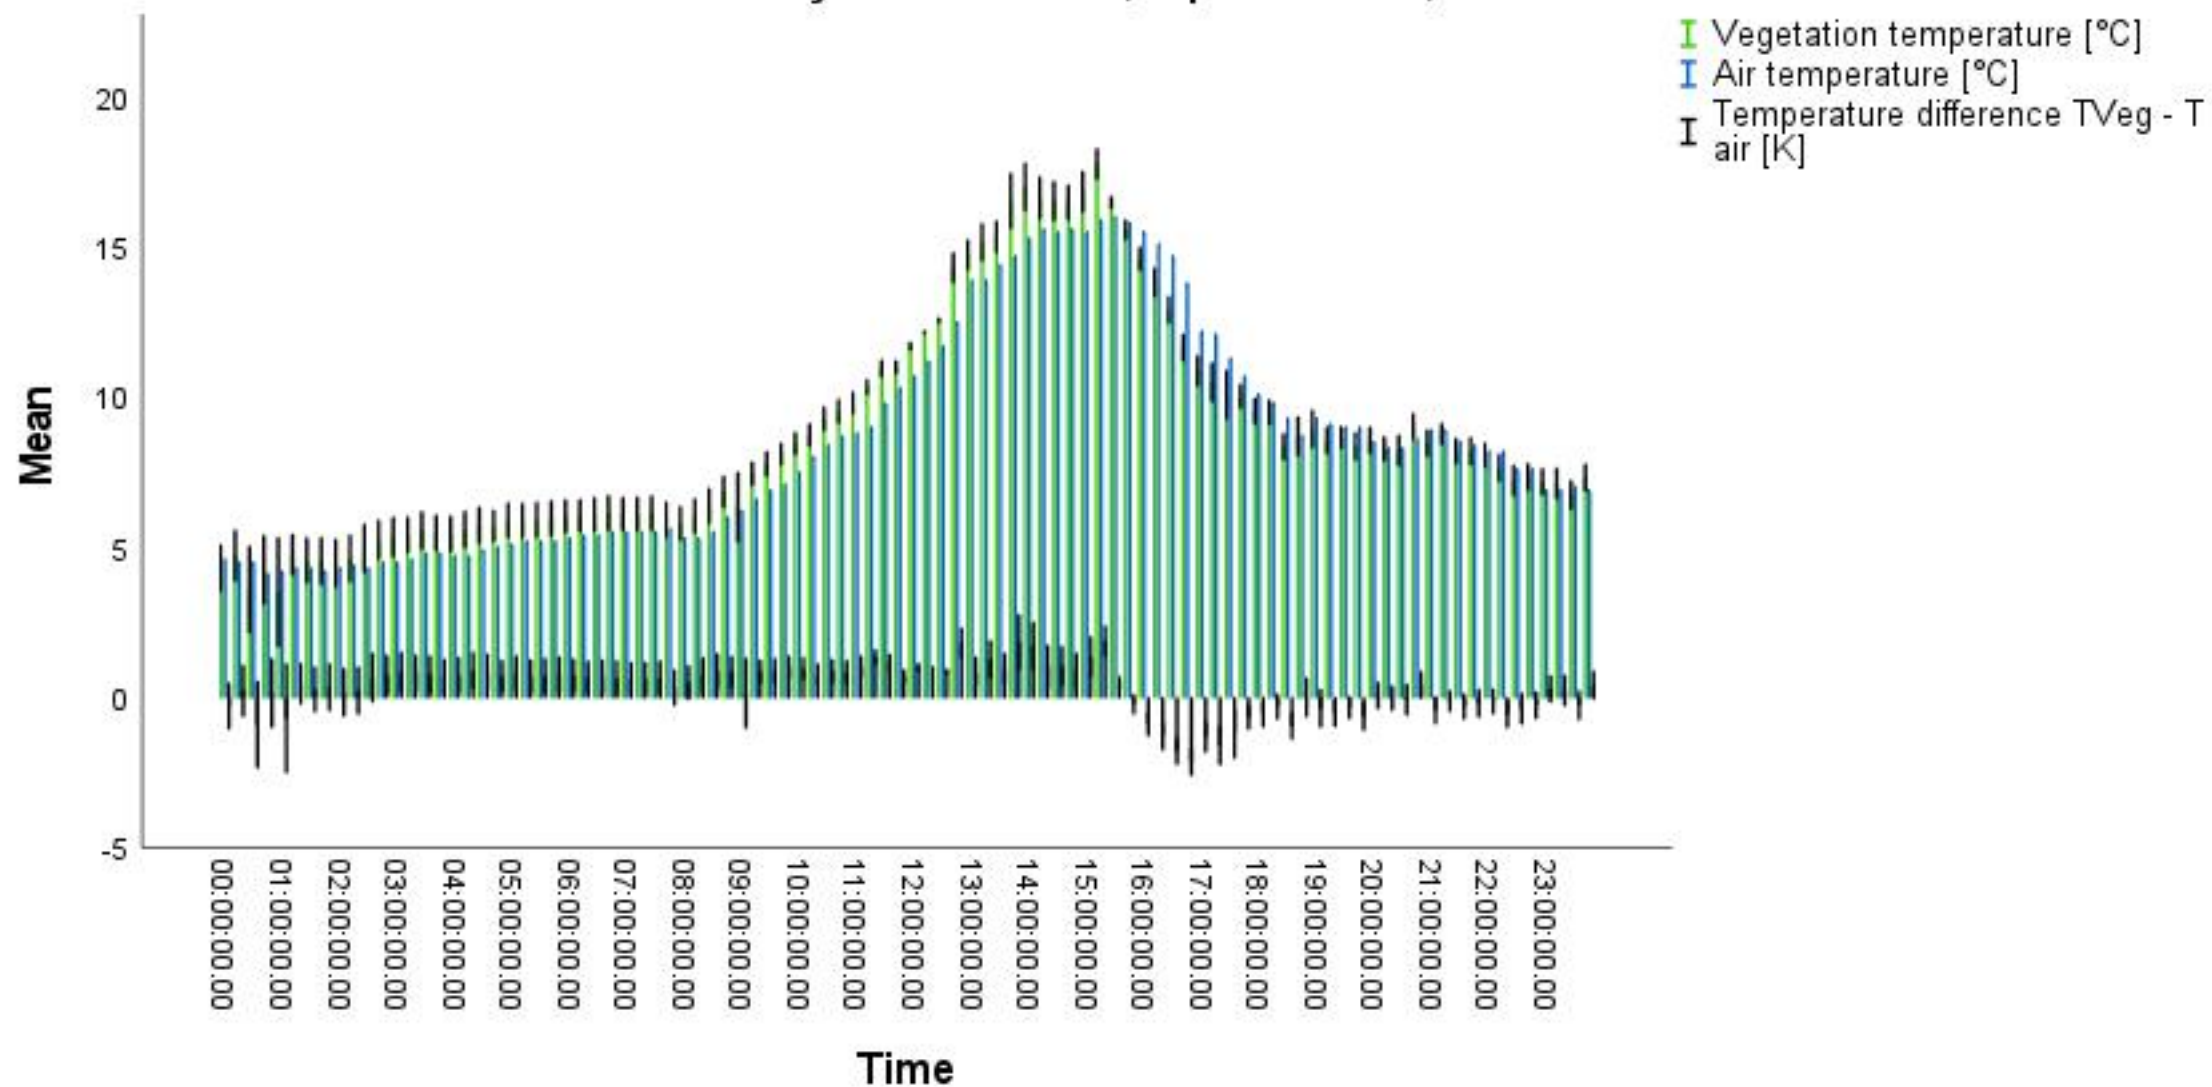

Fehlerbalken: +/- 1 SD

Plant: *Pachysandra terminalis*, Exposition: West, DOY: 311

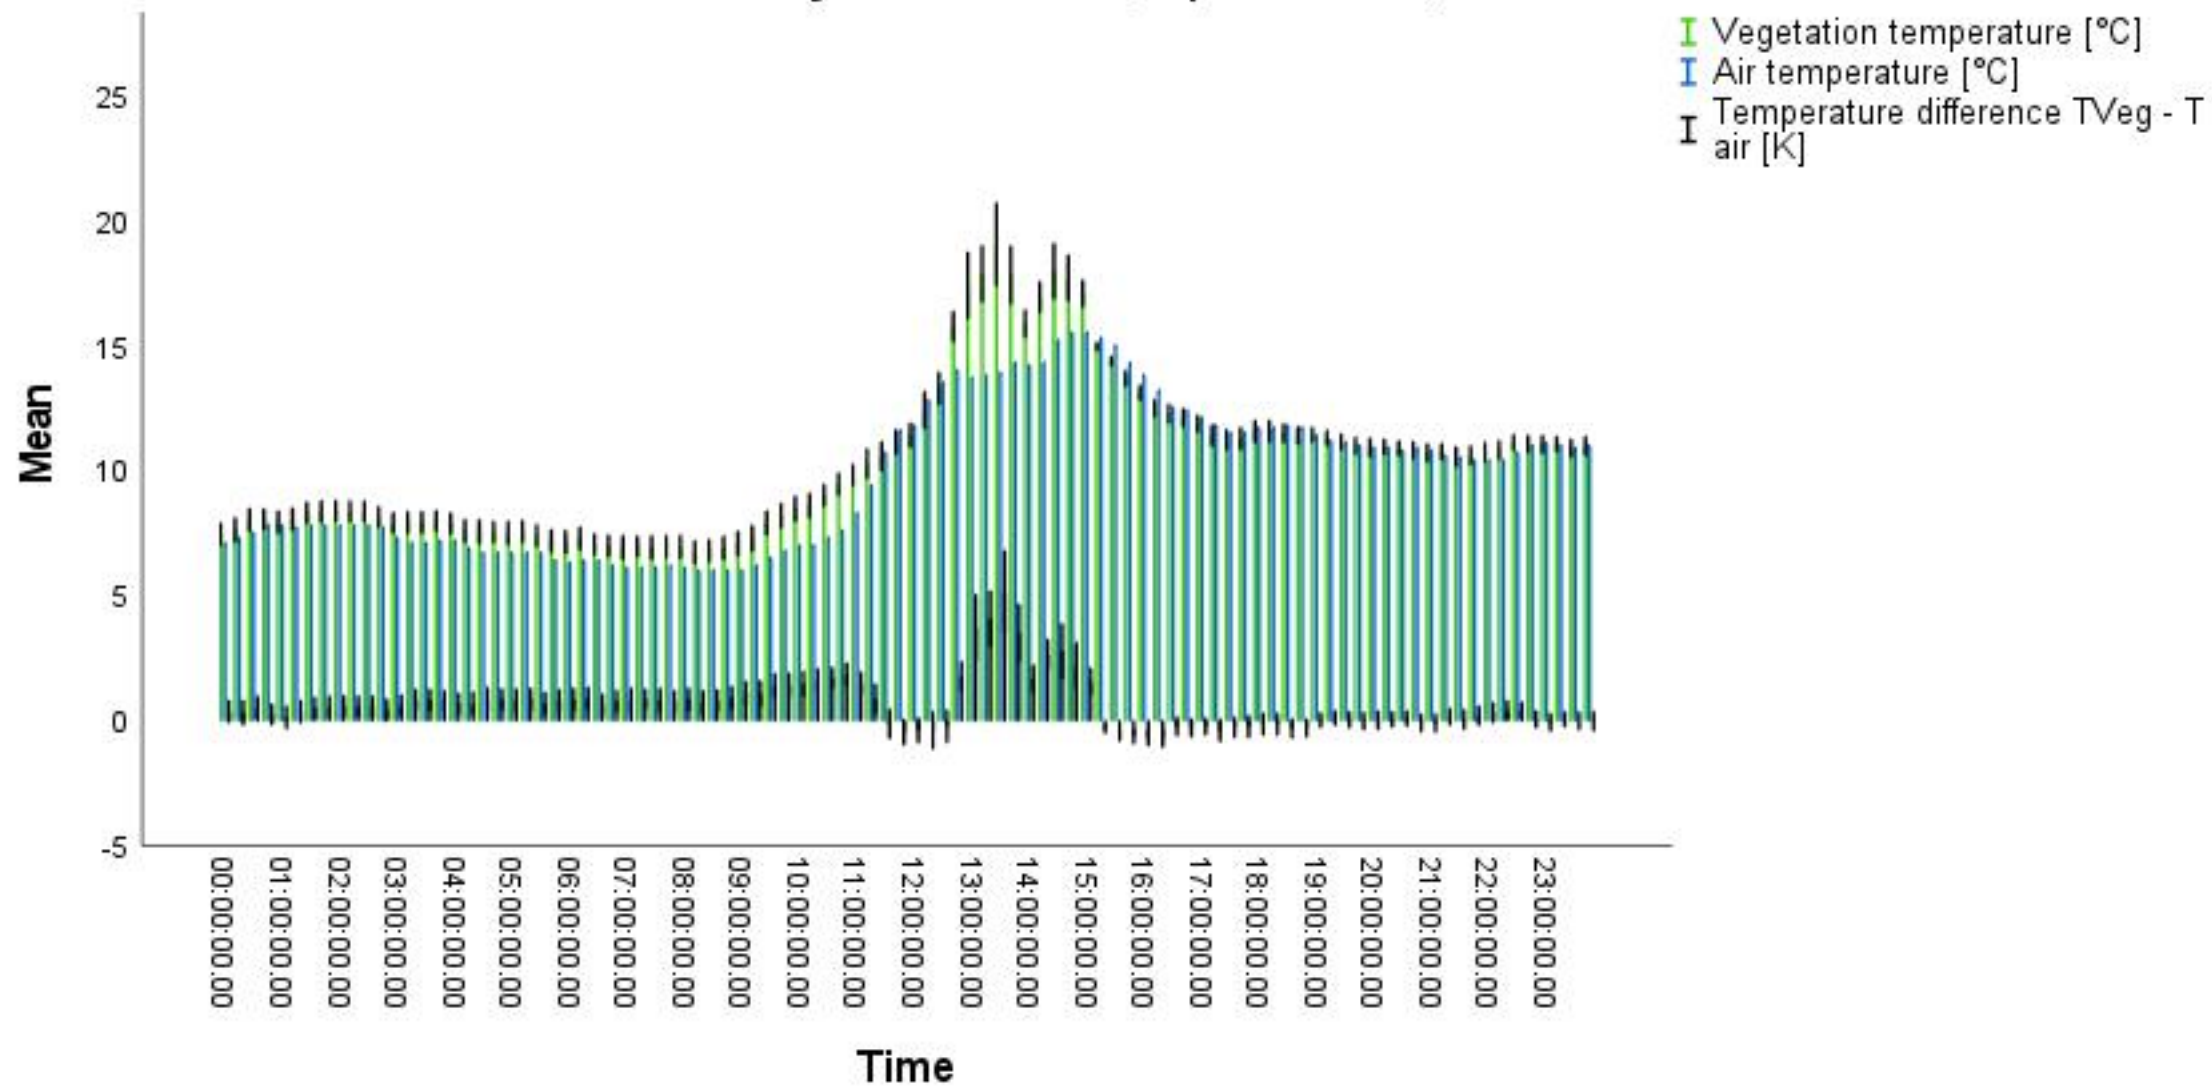

Fehlerbalken: +/- 1 SD

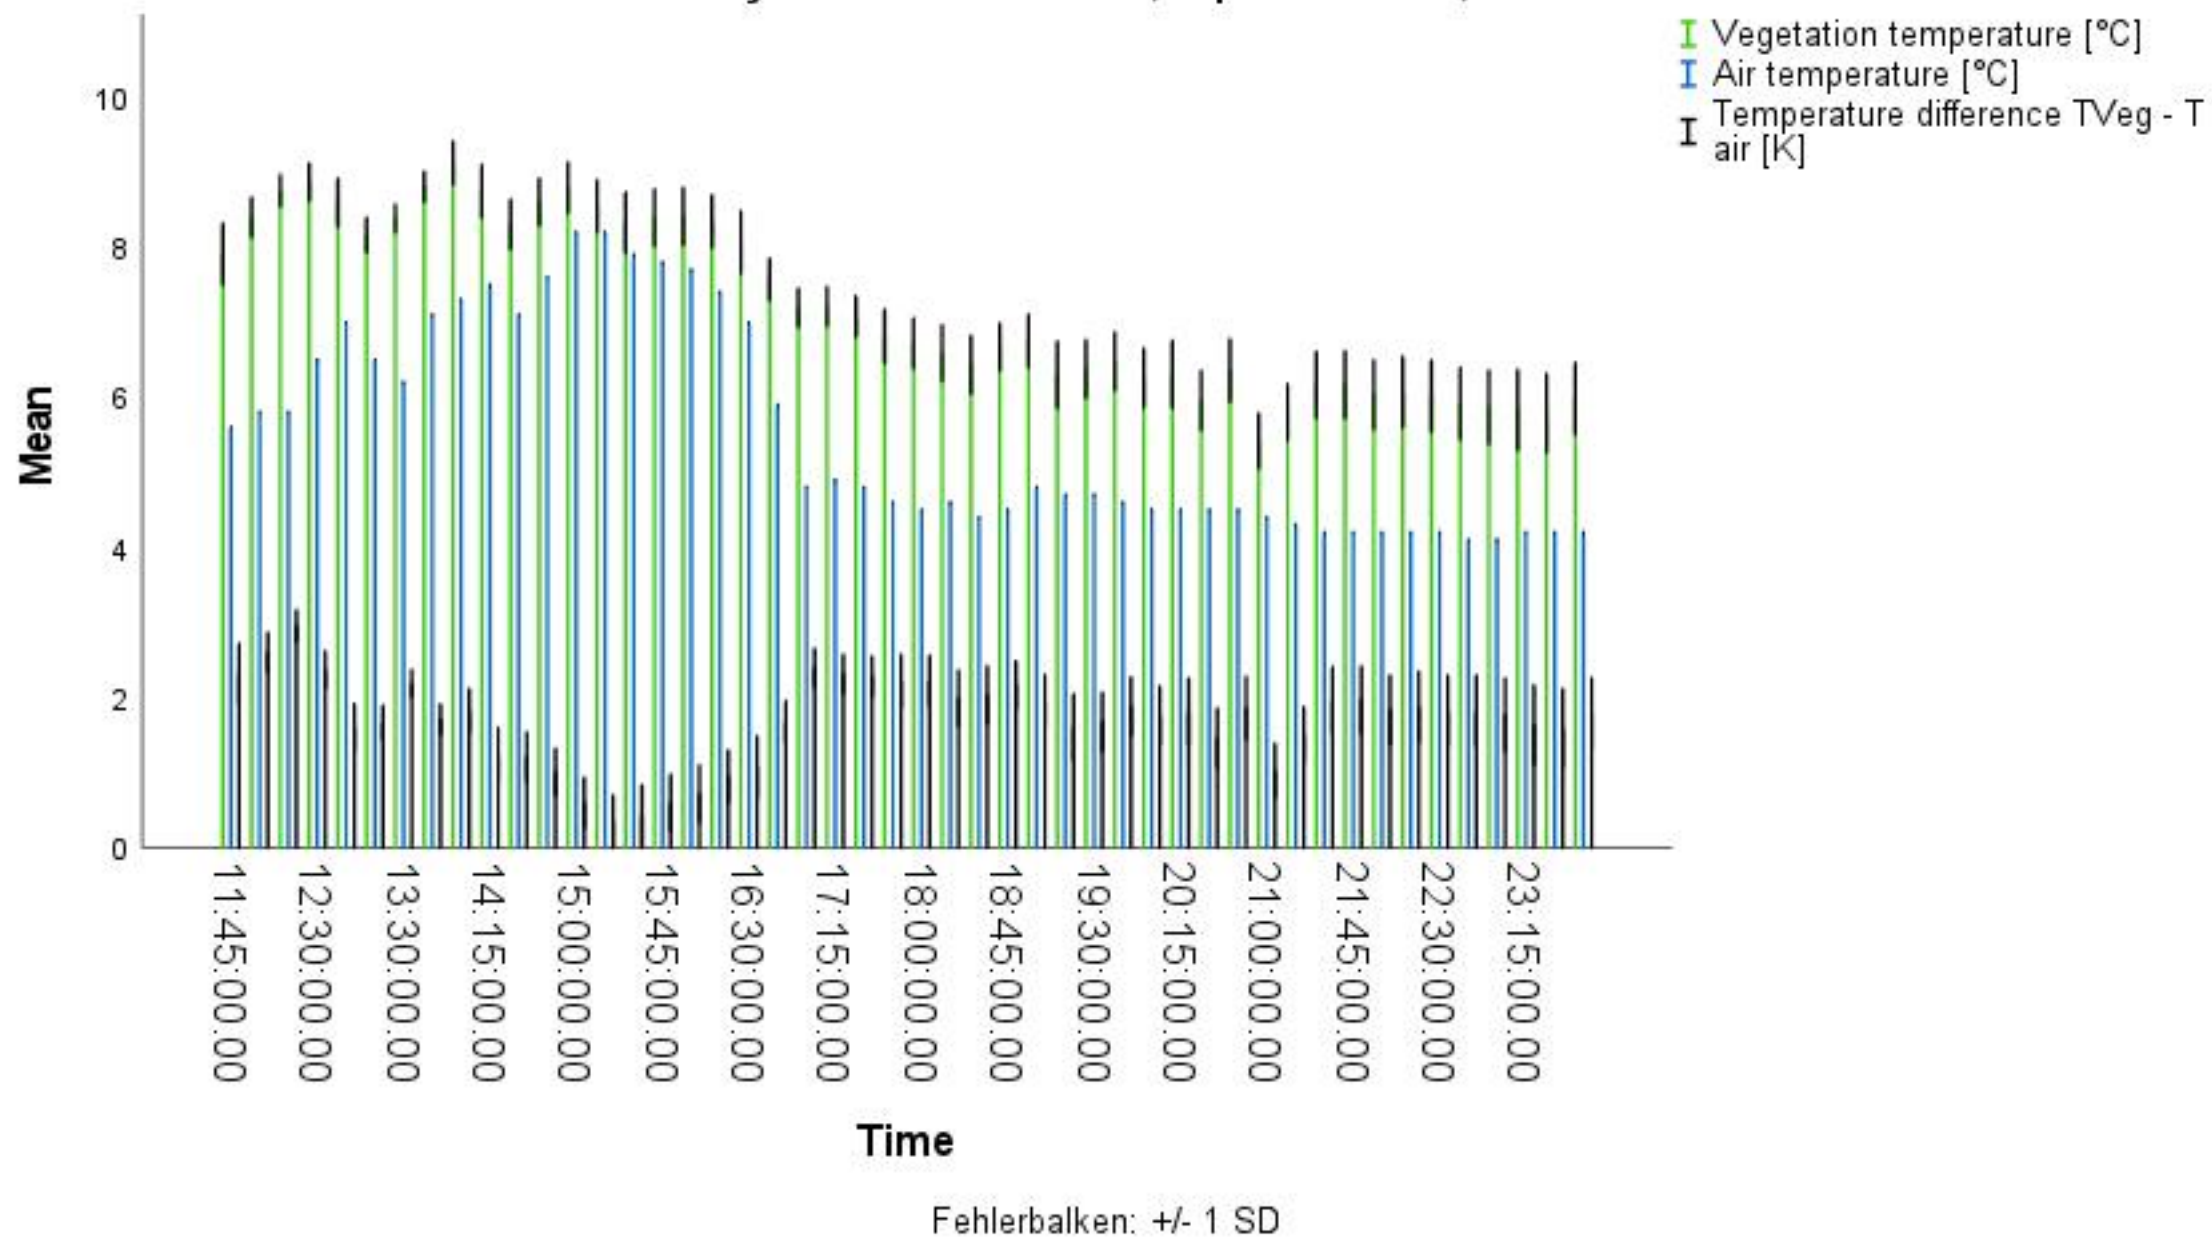



Plant: *Polystichum acrostichoides*, Exposition: North, DOY: 345

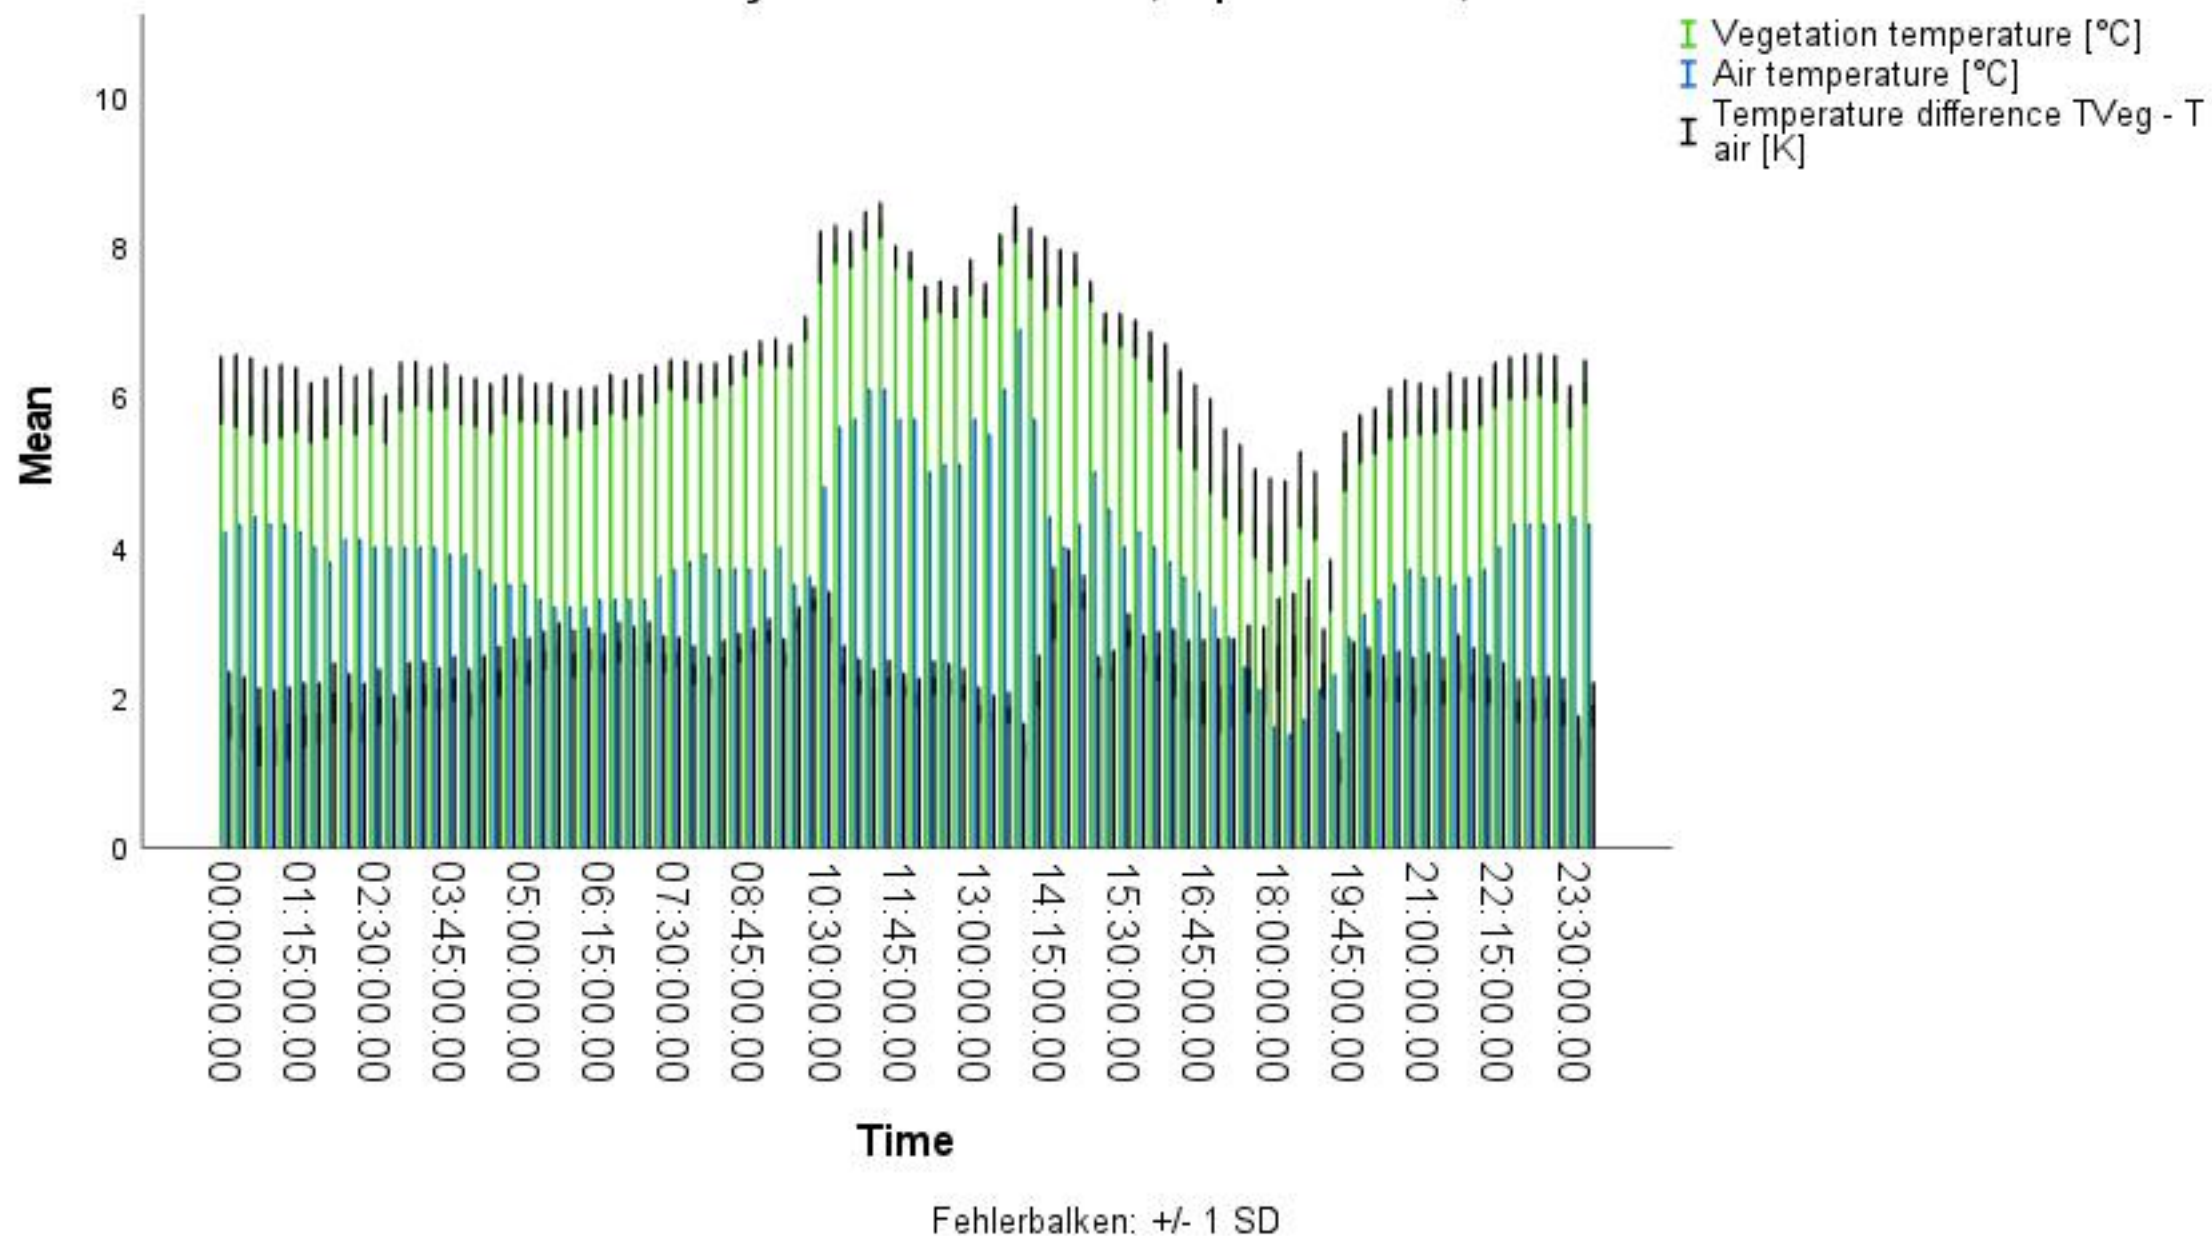

Plant: *Polystichum setiferum* 'Proliferum', Exposition: East, DOY: 316

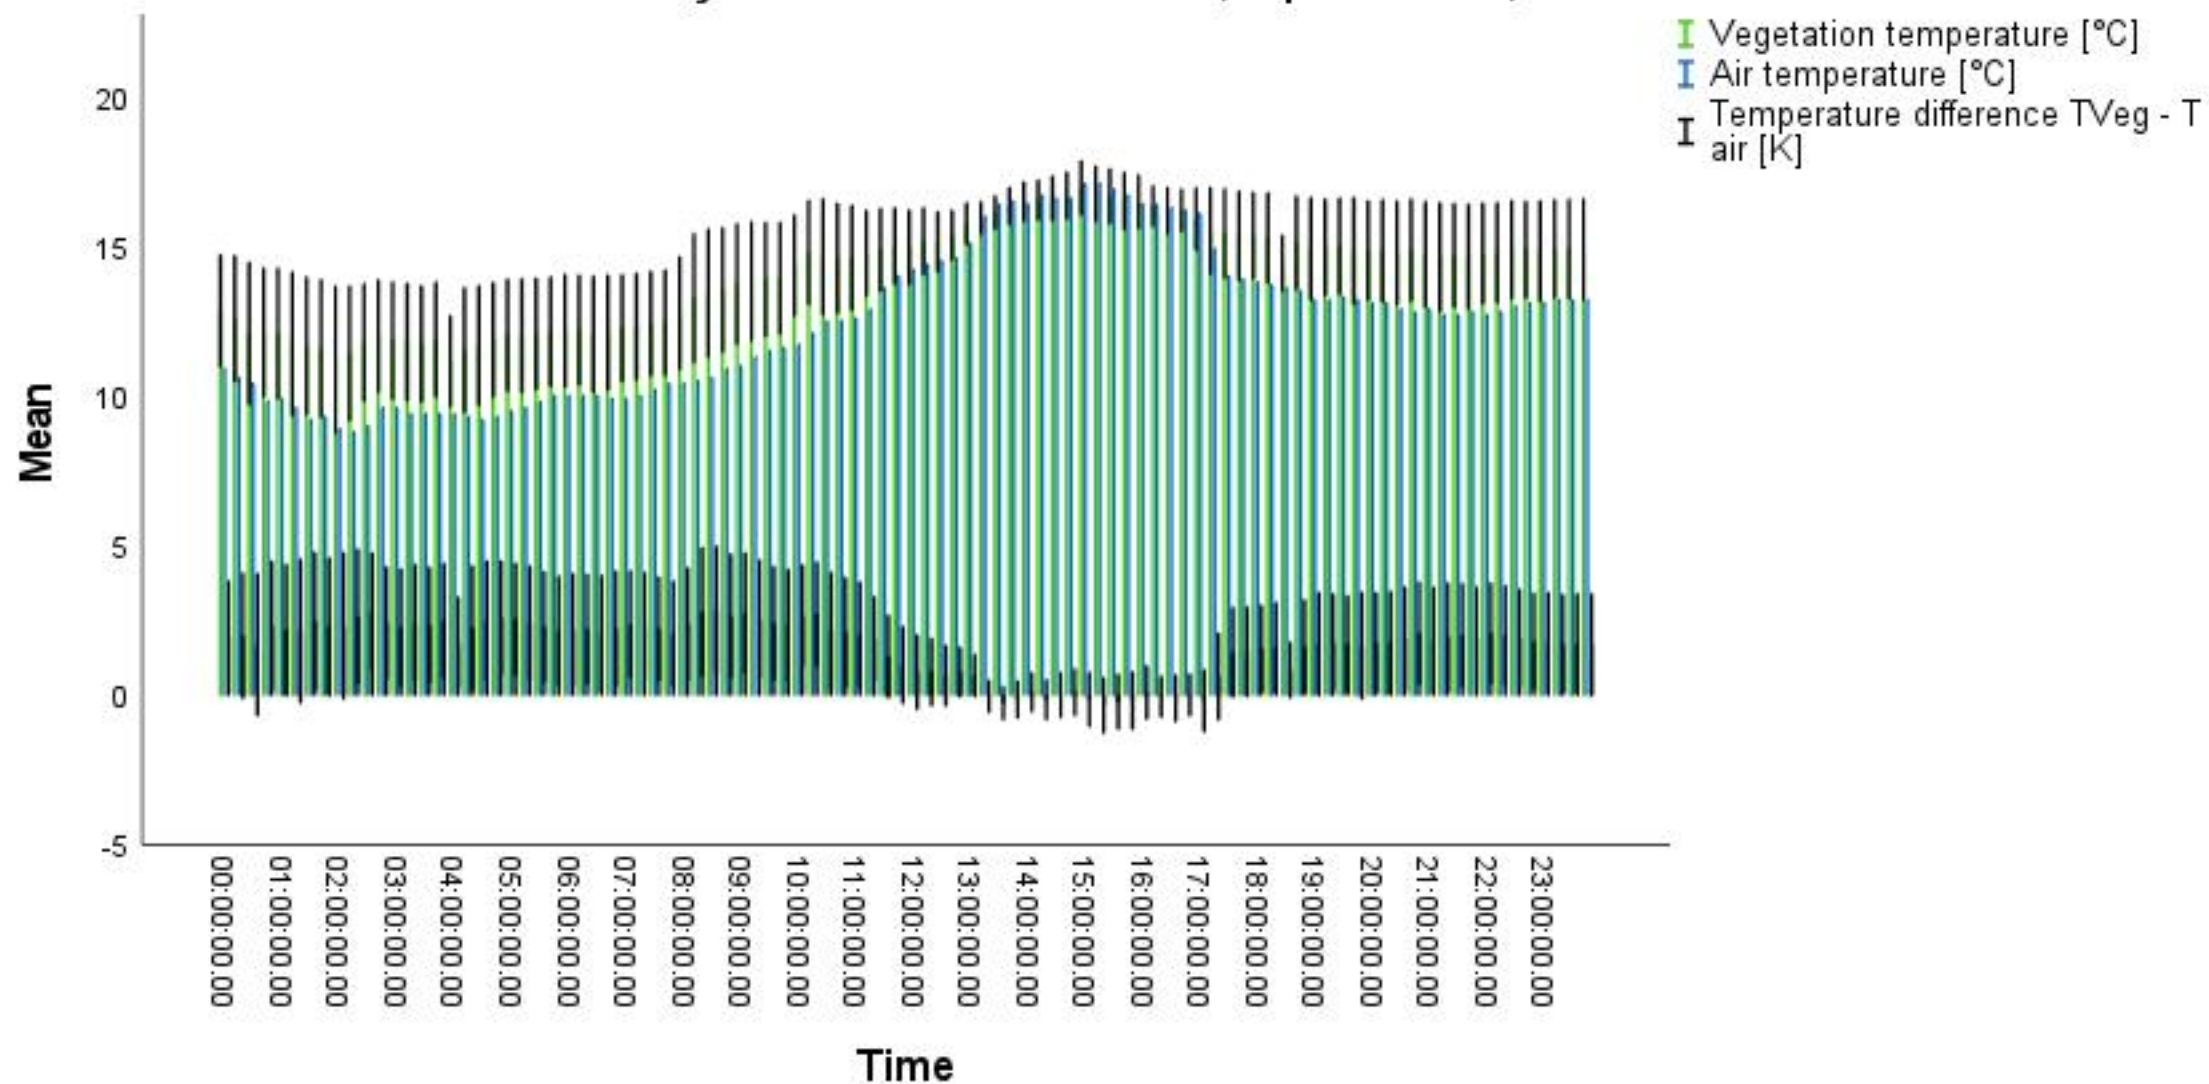

Fehlerbalken: +/- 1 SD

Plant: *Polystichum setiferum* 'Proliferum', Exposition: East, DOY: 317

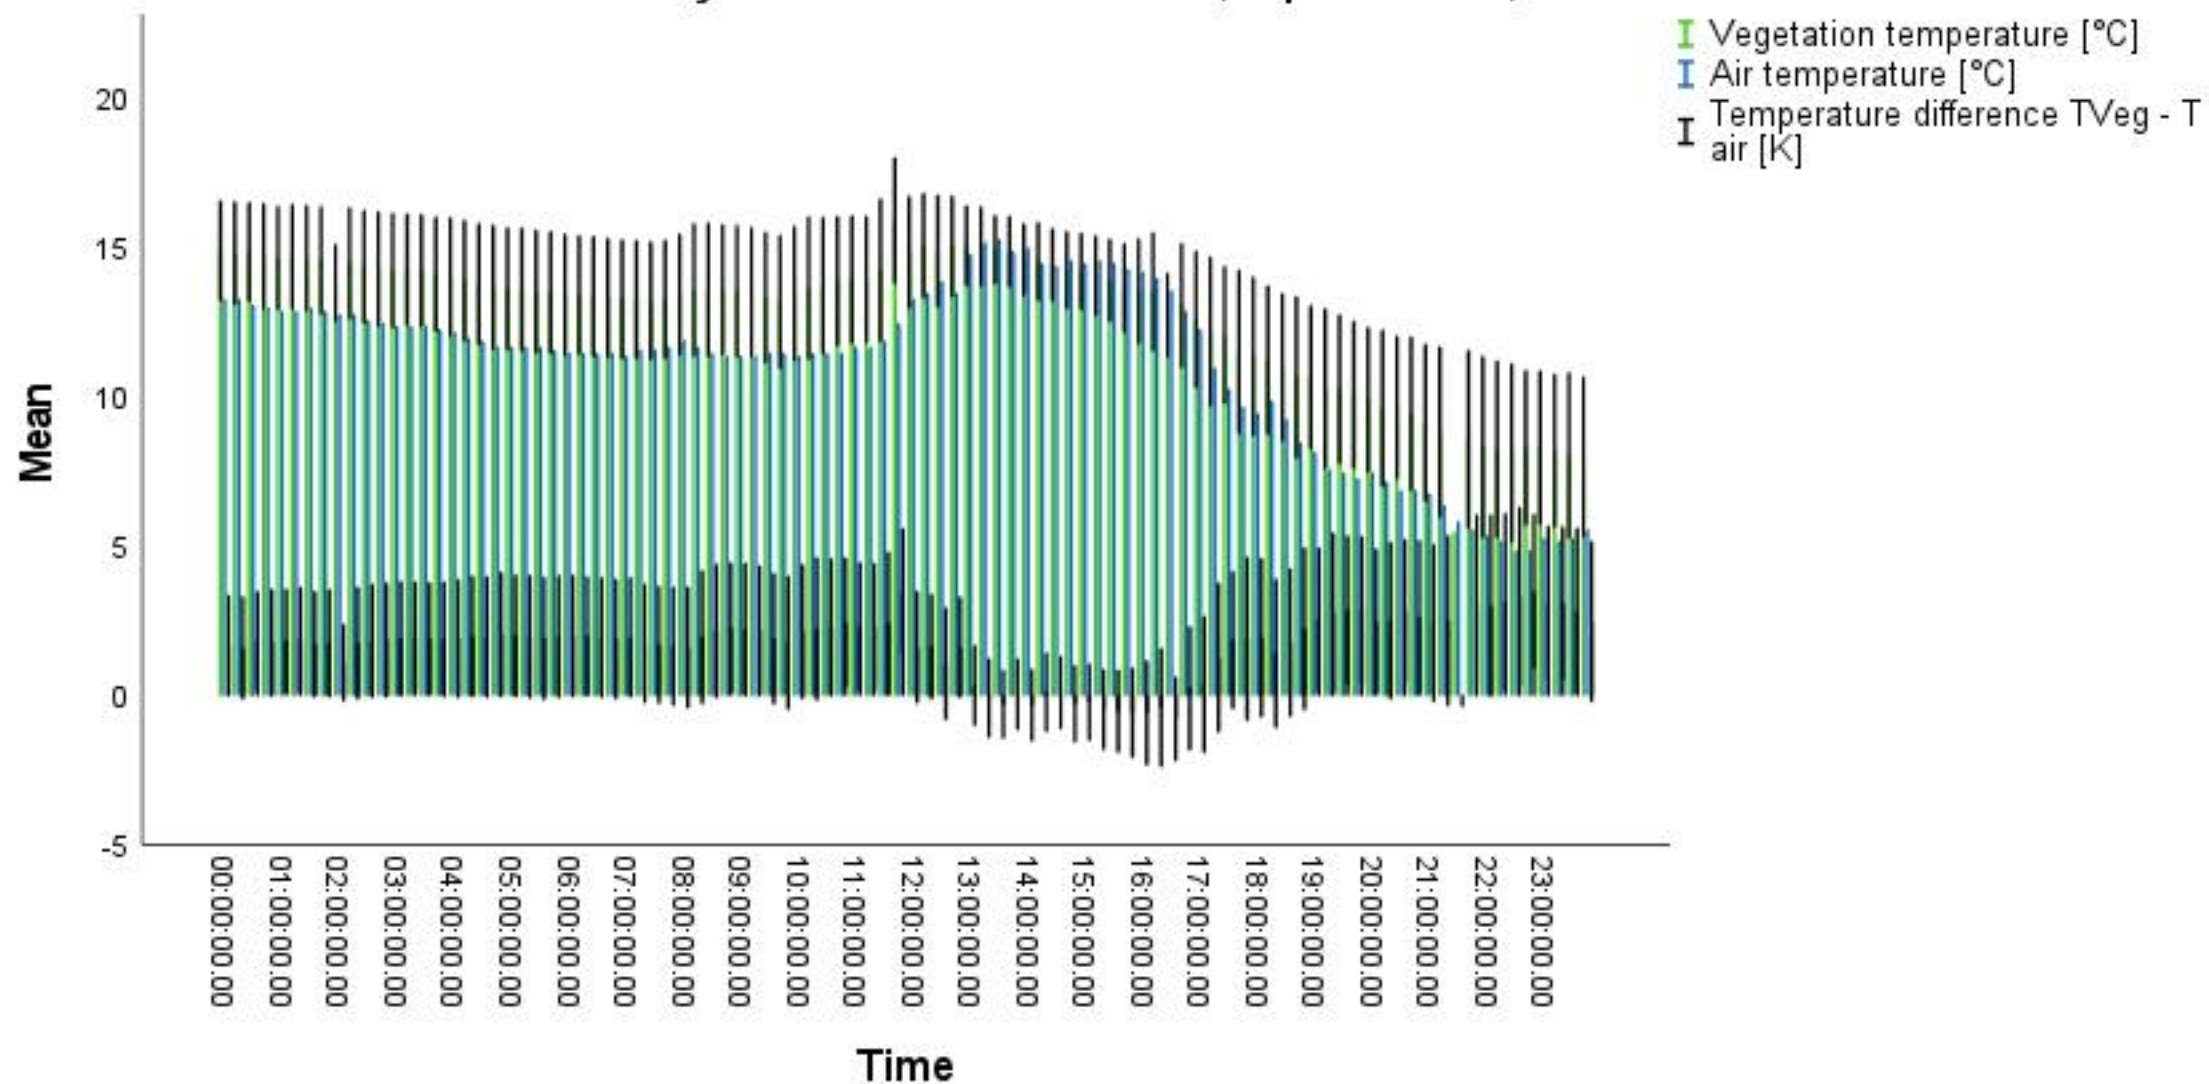

Fehlerbalken: +/- 1 SD

Plant: *Polypodium vulgare*, Exposition: East, DOY: 318

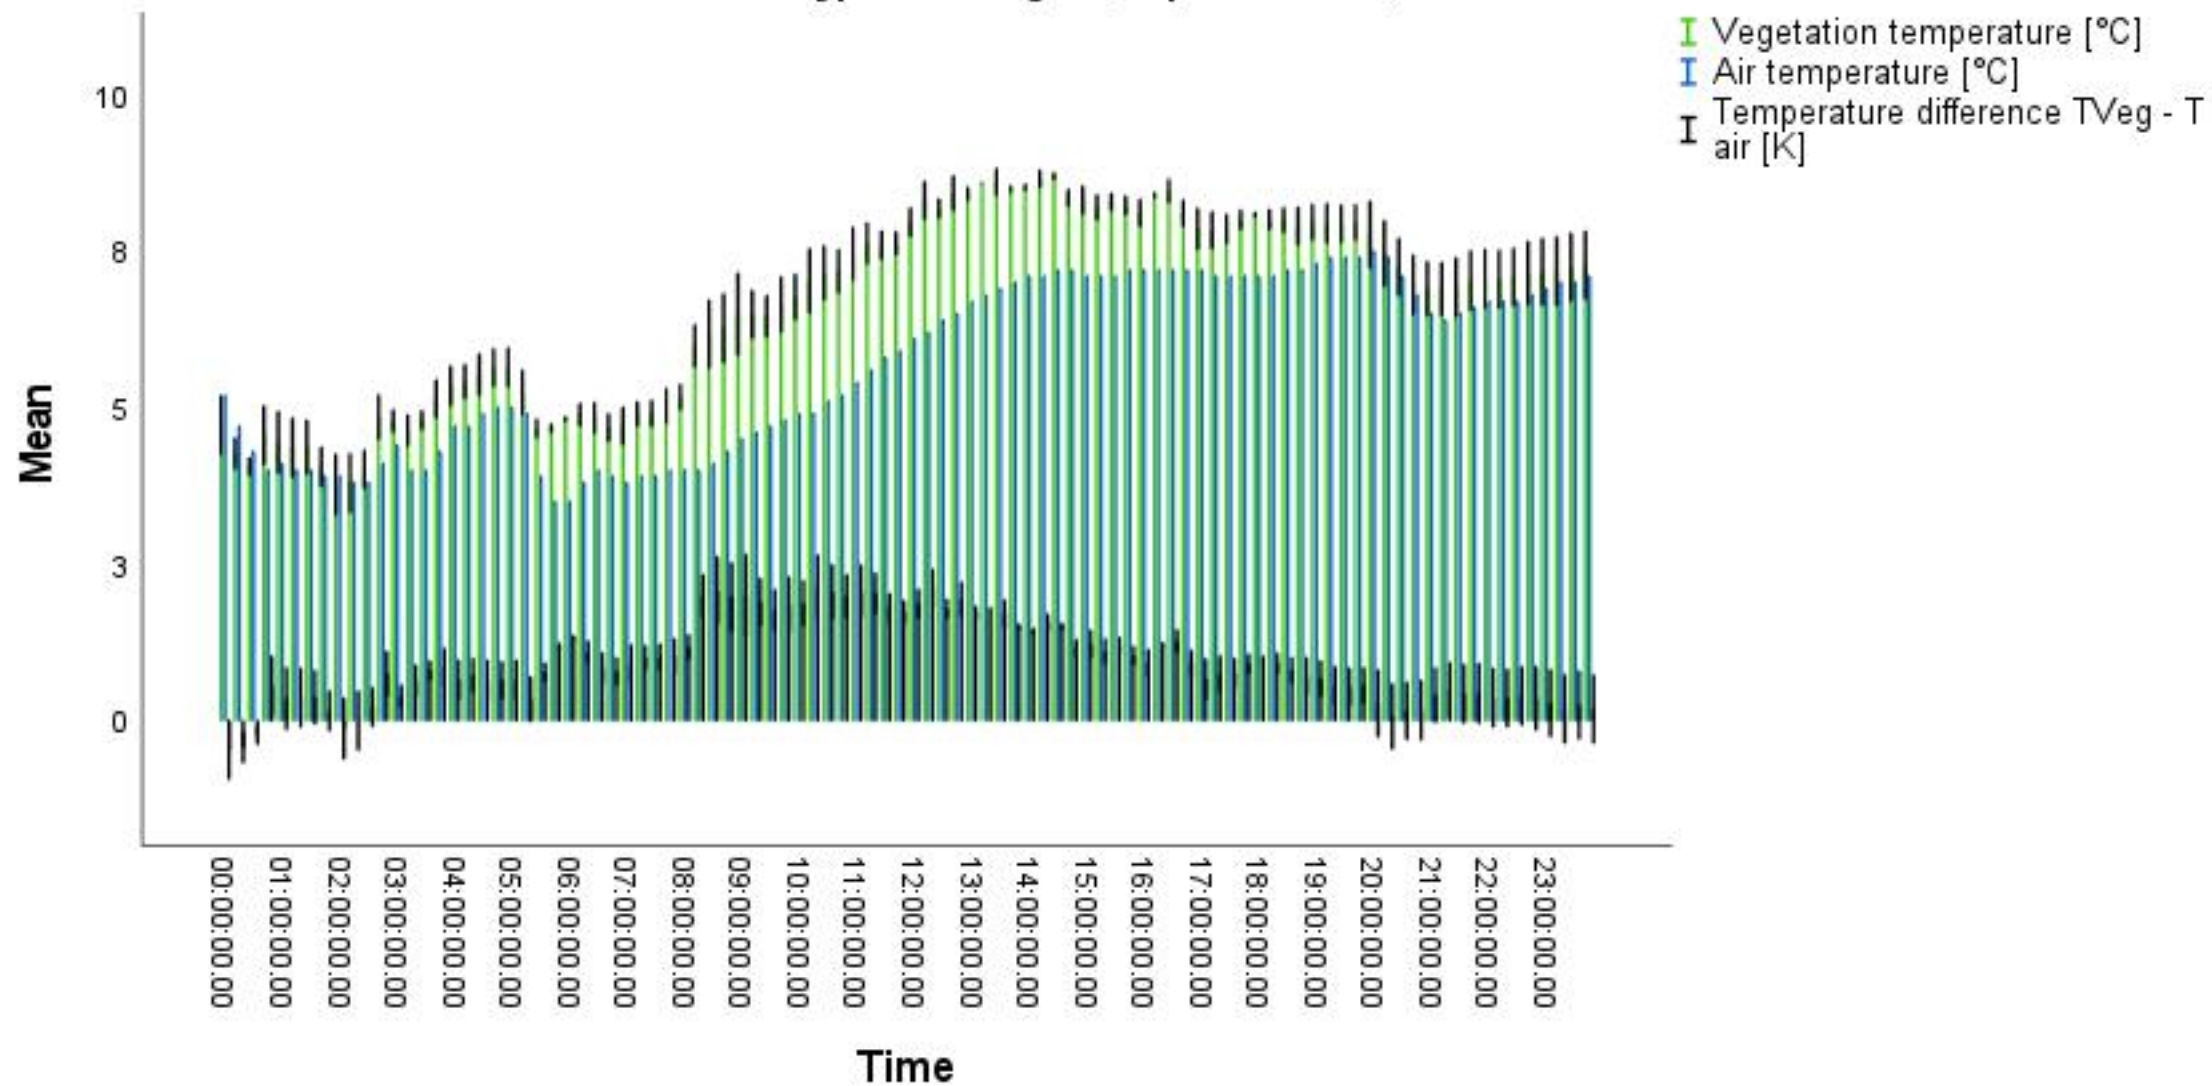

Fehlerbalken: +/- 1 SD

Plant: *Polypodium vulgare*, Exposition: East, DOY: 319

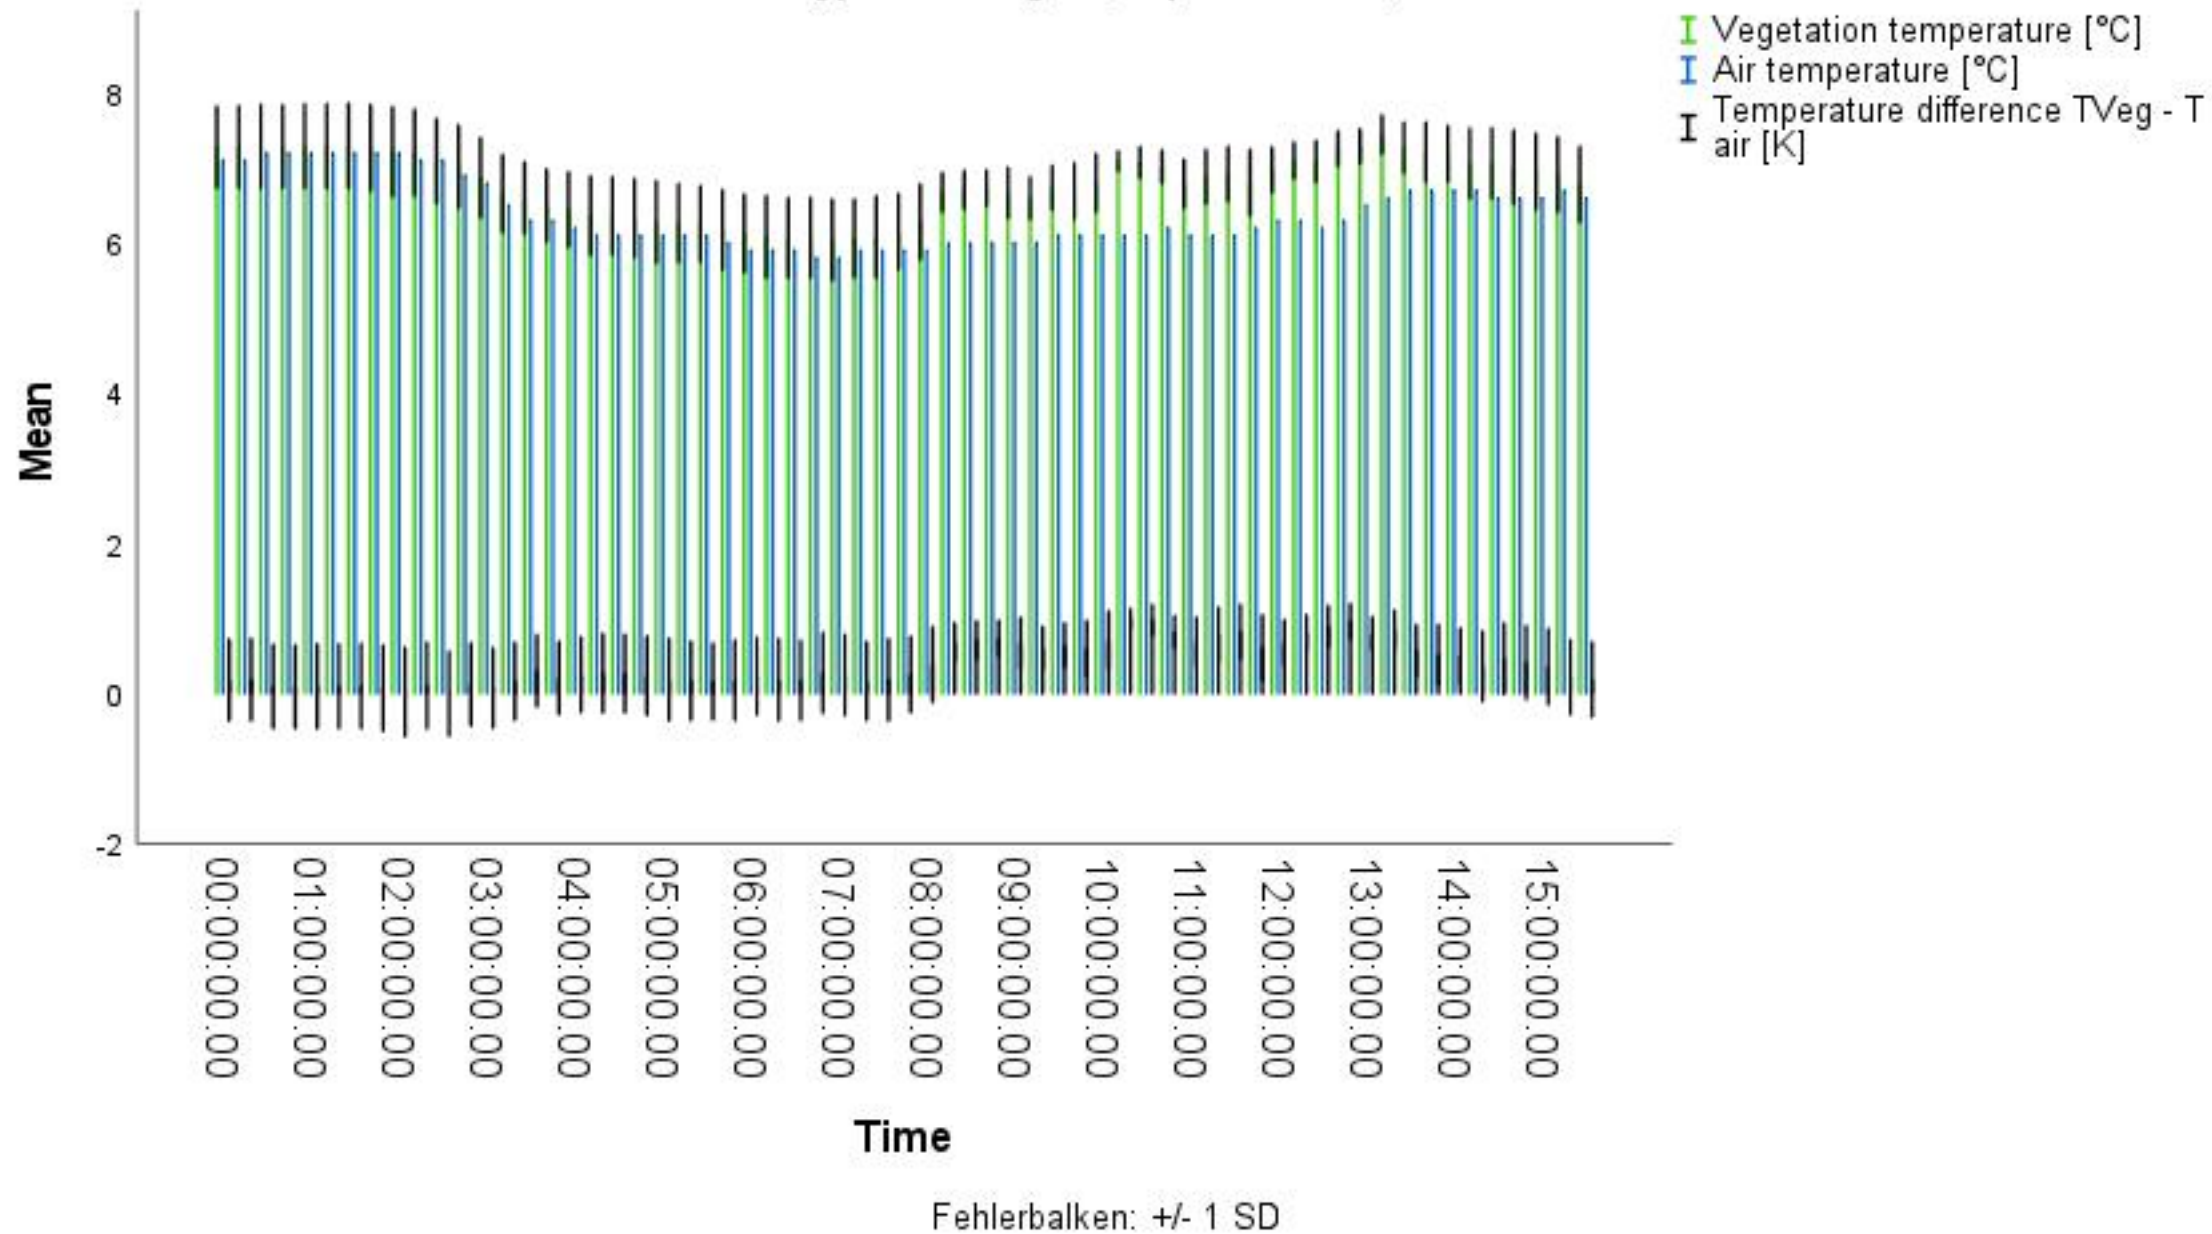



Plant: *Polypodium vulgare*, Exposition: West, DOY: 318

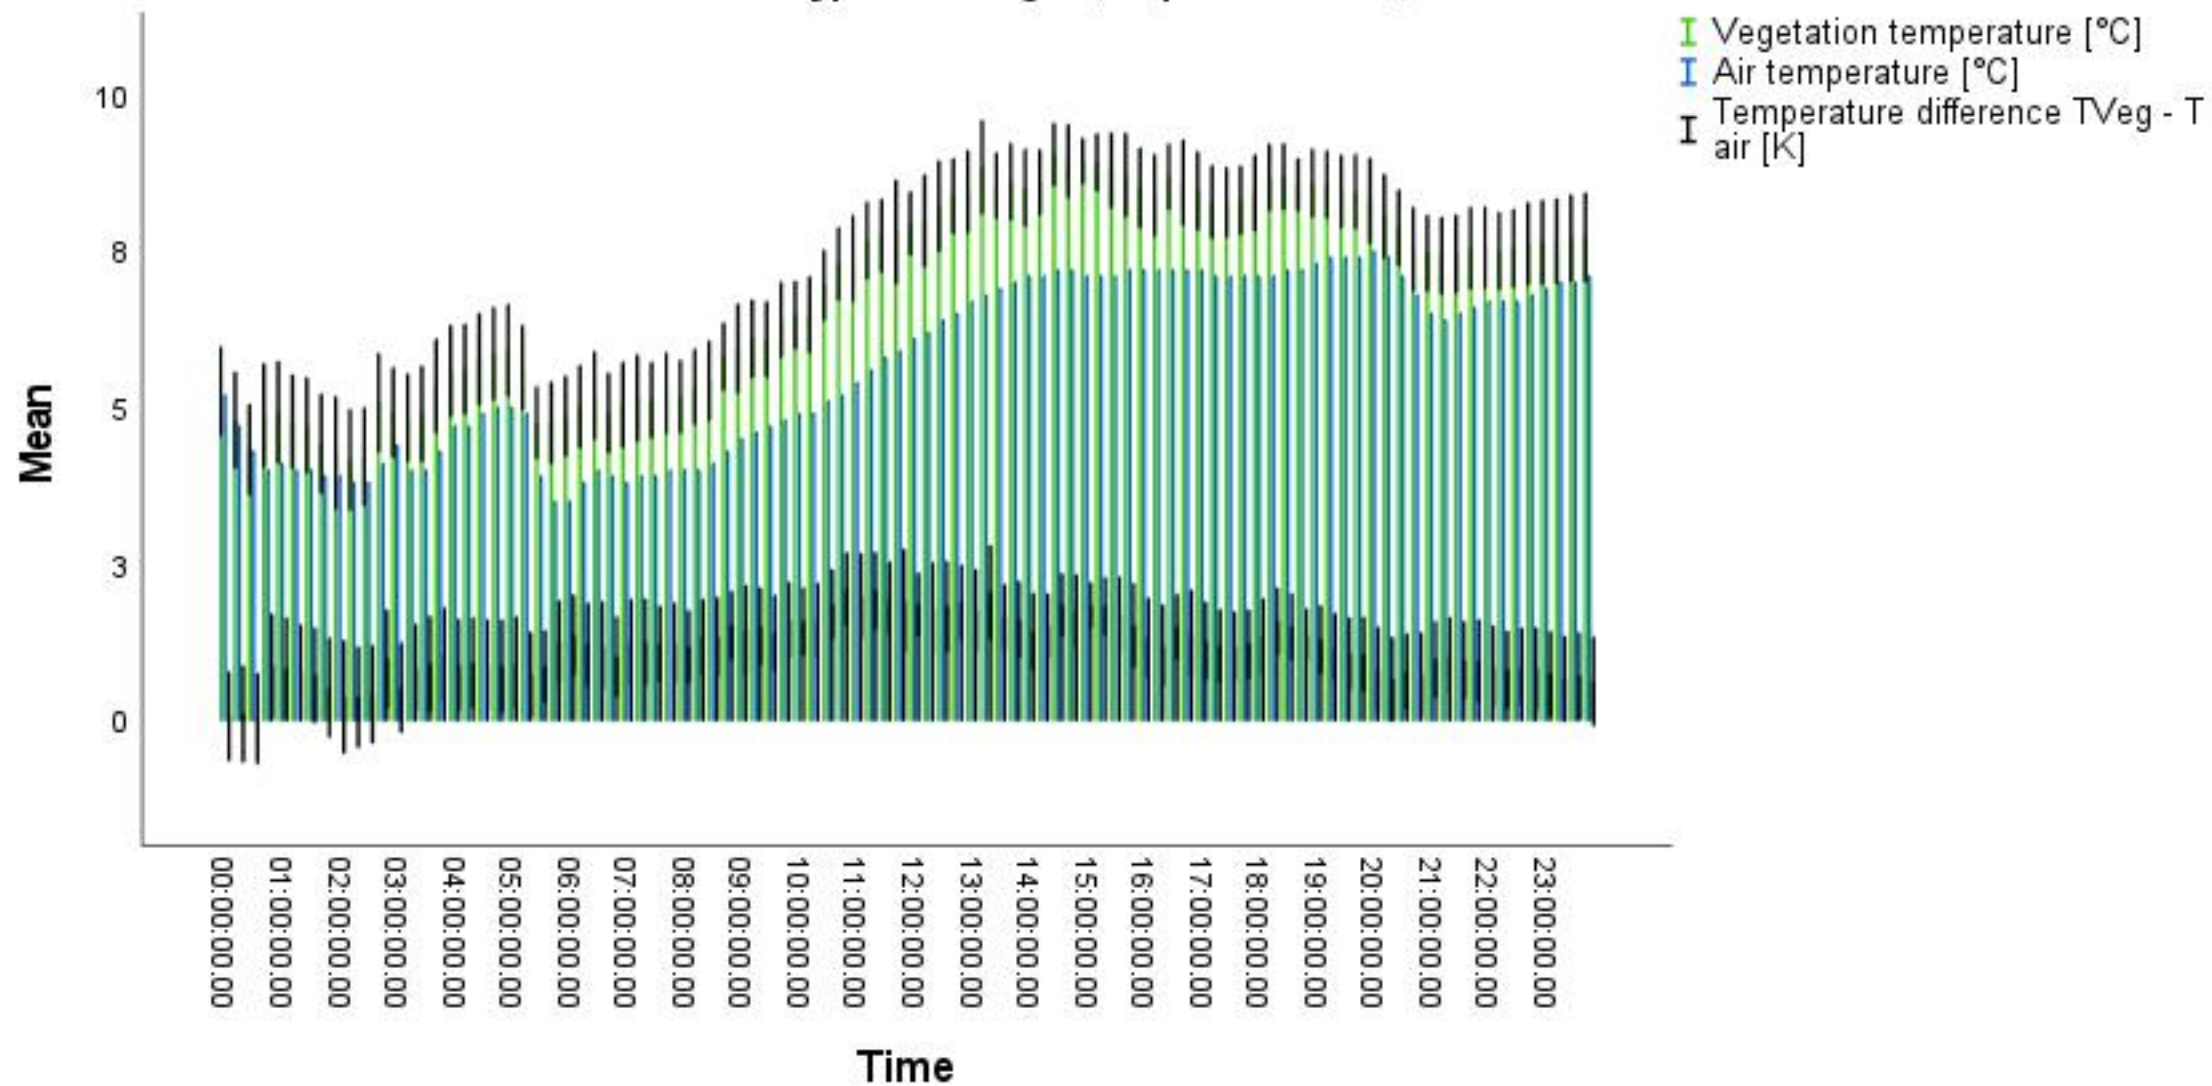

Fehlerbalken:  $\pm 1$  SD

Plant: *Polypodium vulgare*, Exposition: West, DOY: 319

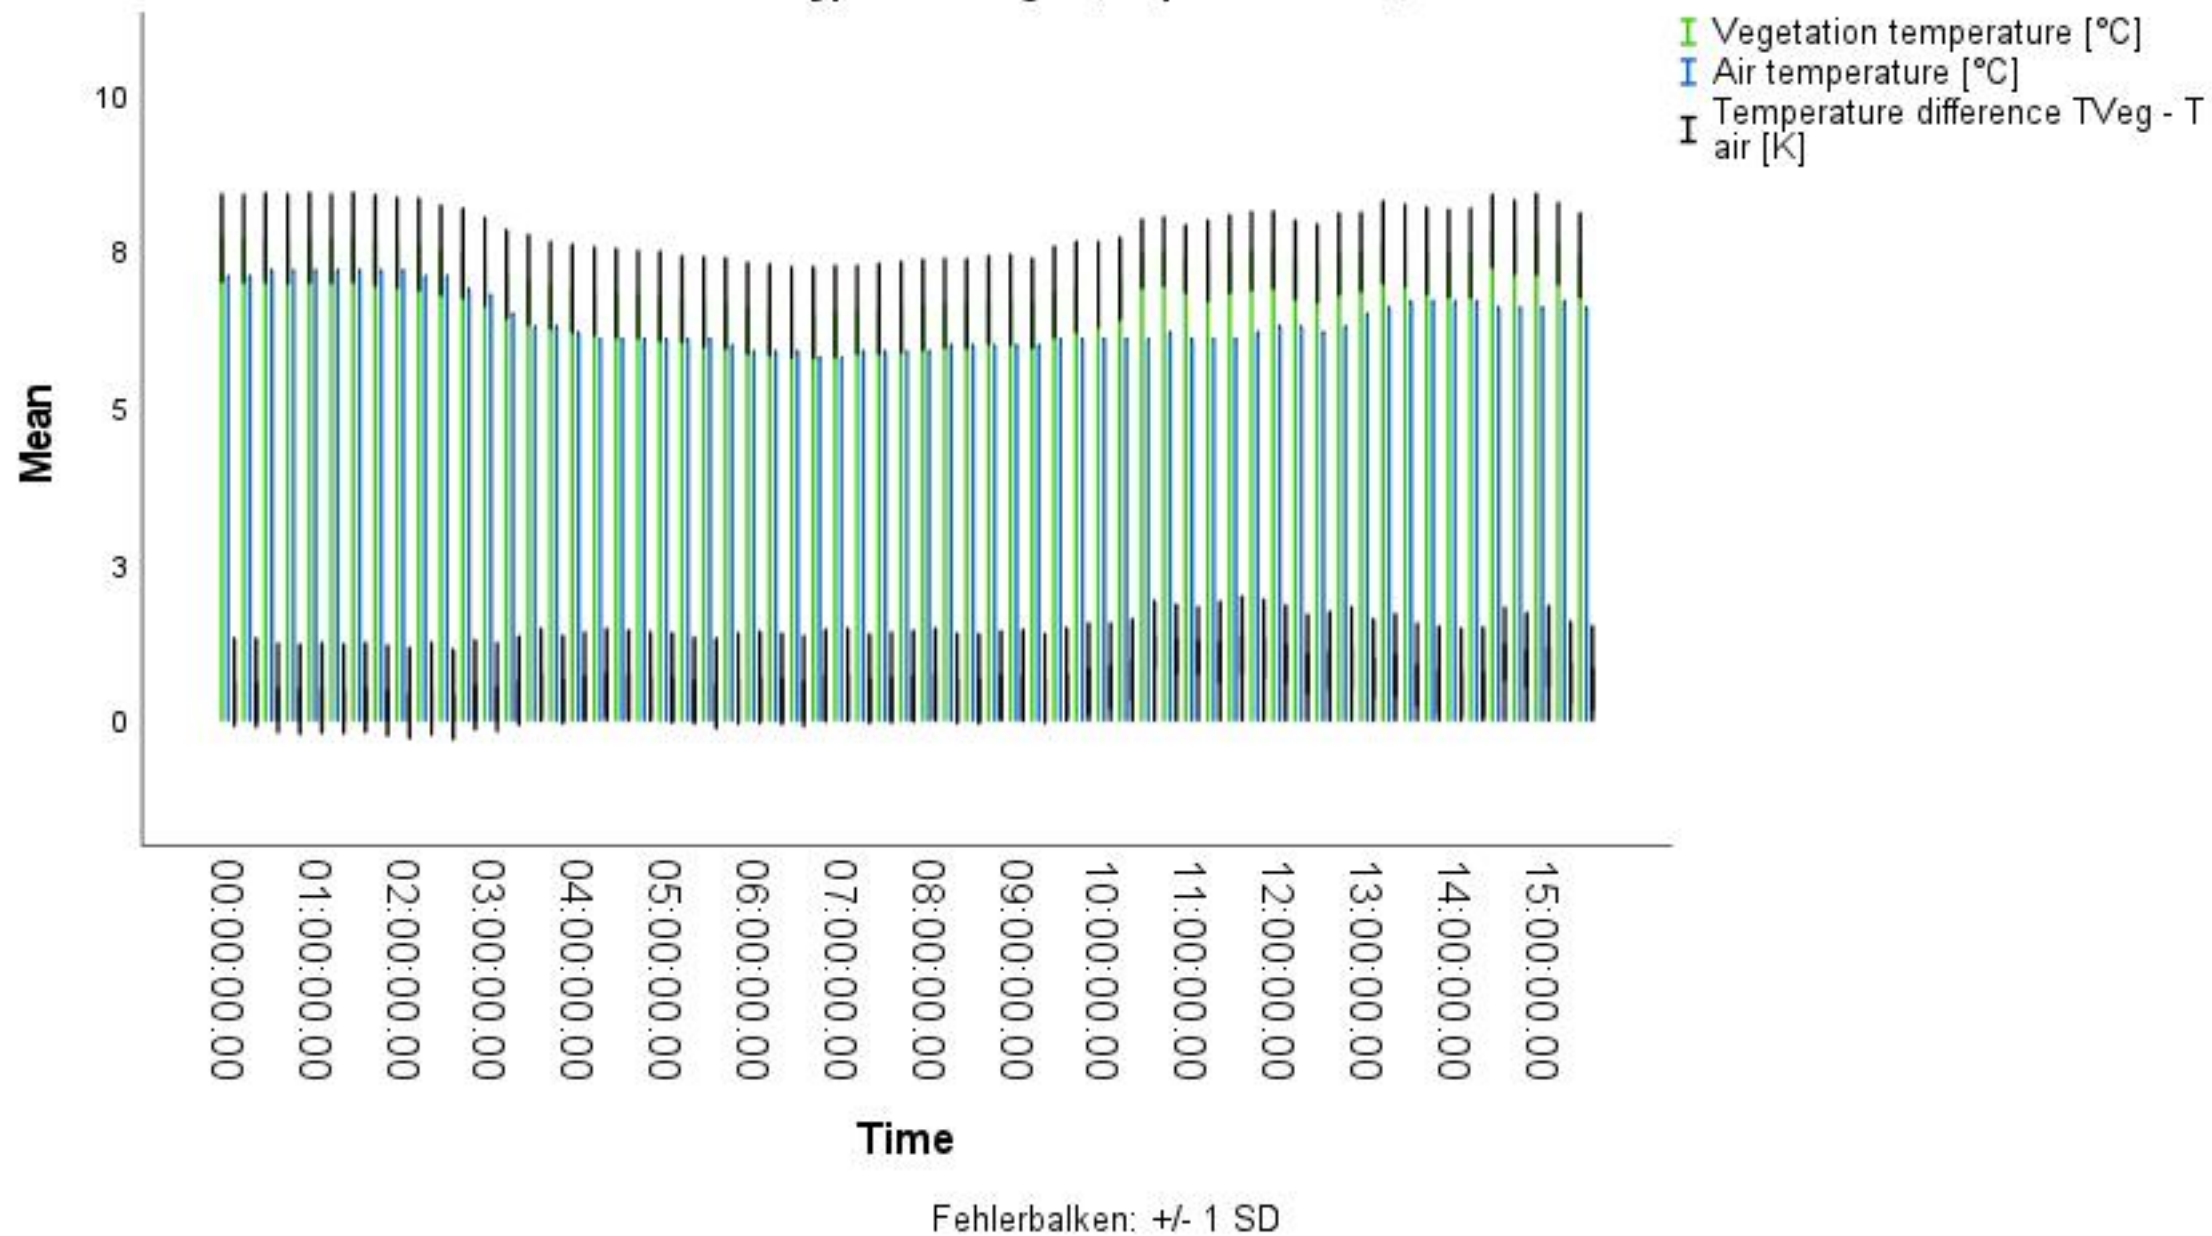

Plant: *Tellima grandiflora* 'Rubra', Exposition: North, DOY: 342

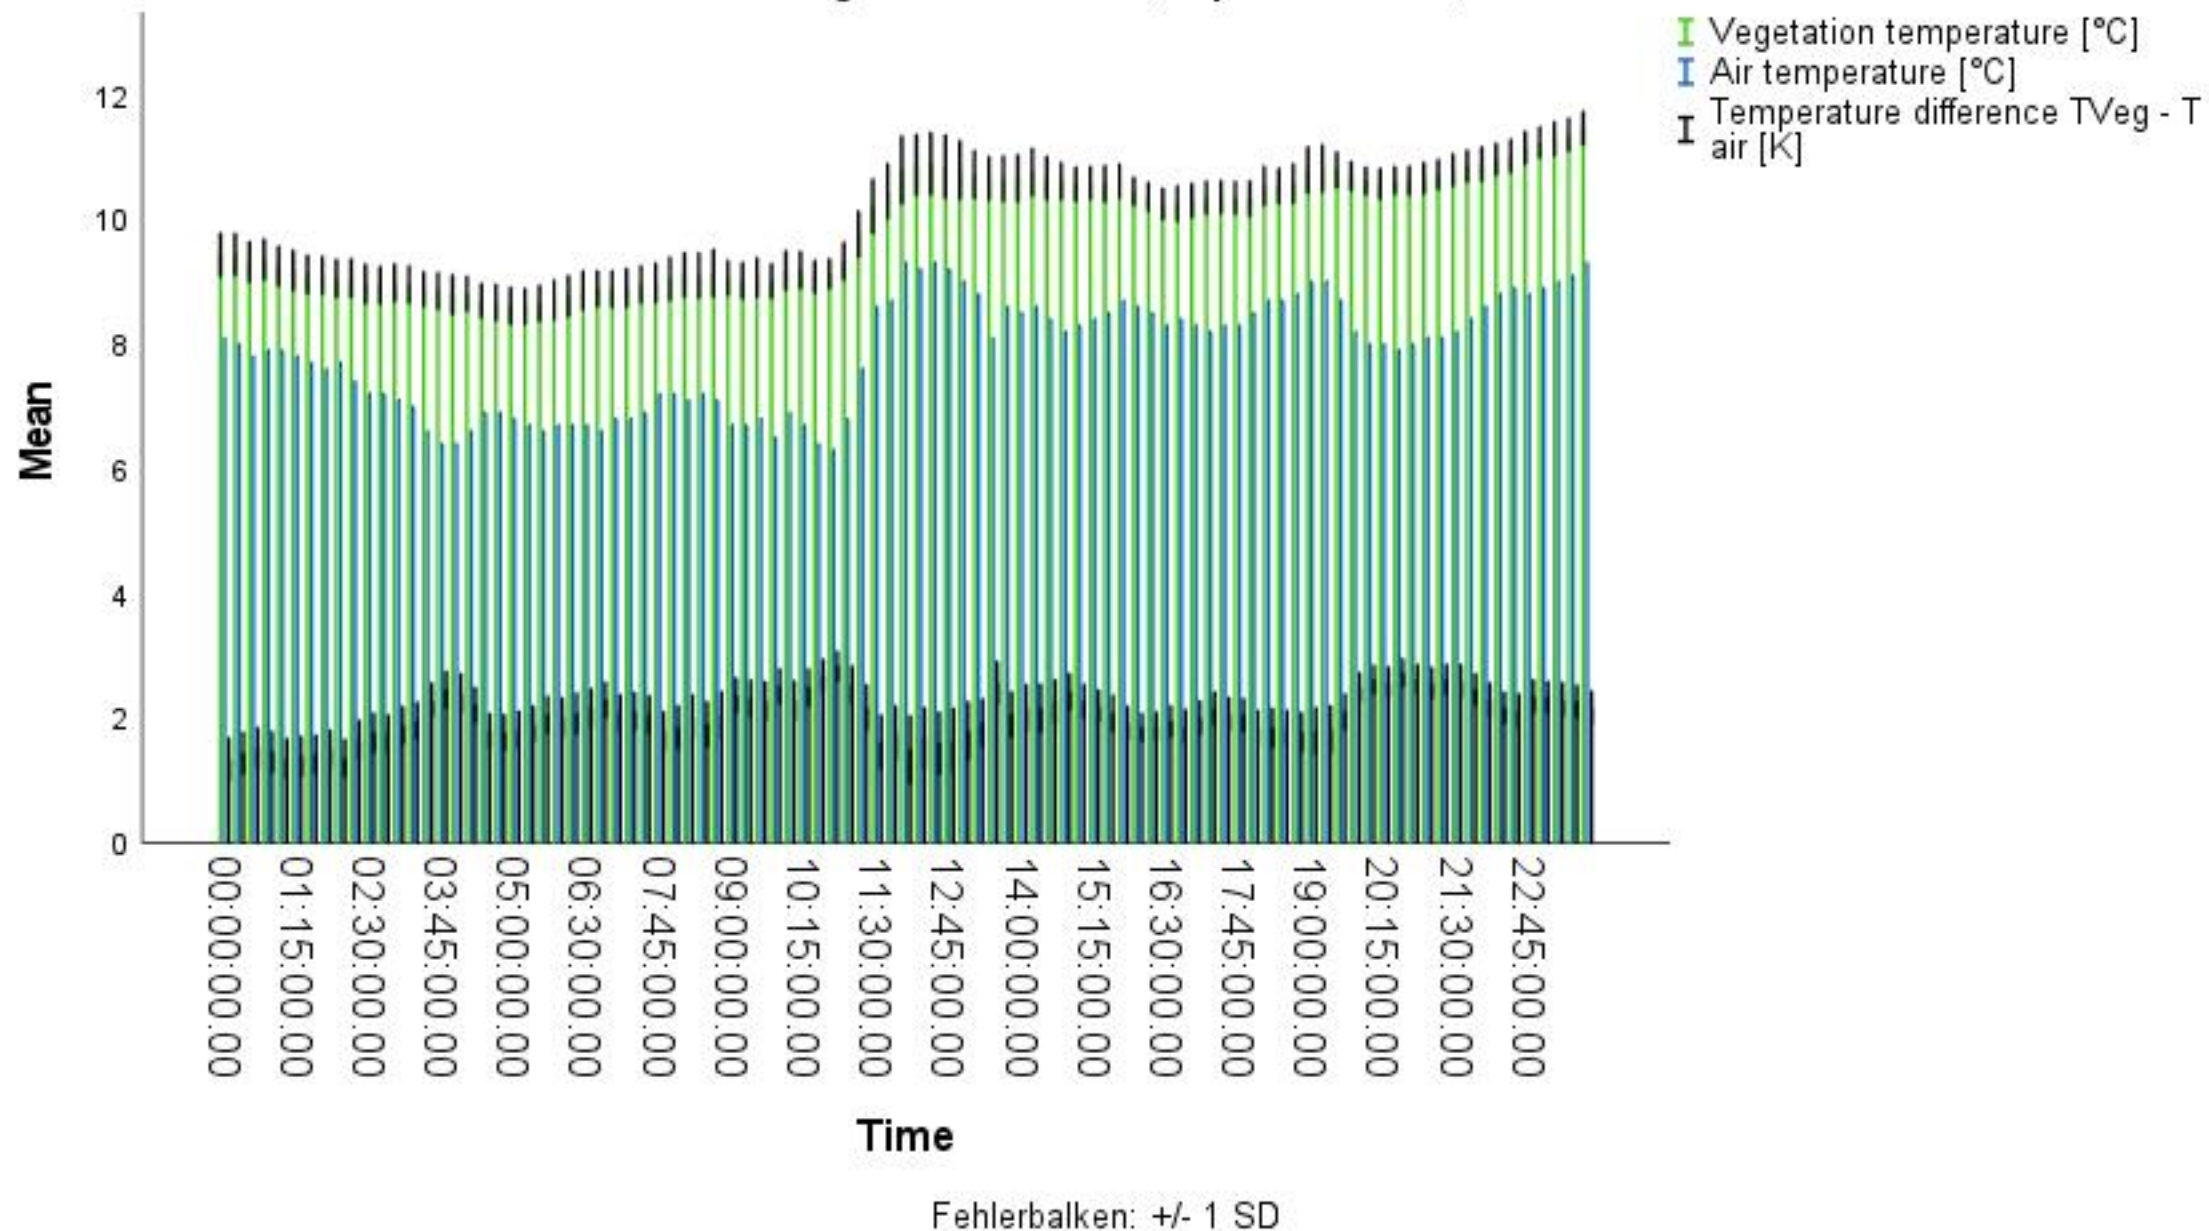

Plant: *Tellima grandiflora* 'Rubra', Exposition: North, DOY: 343

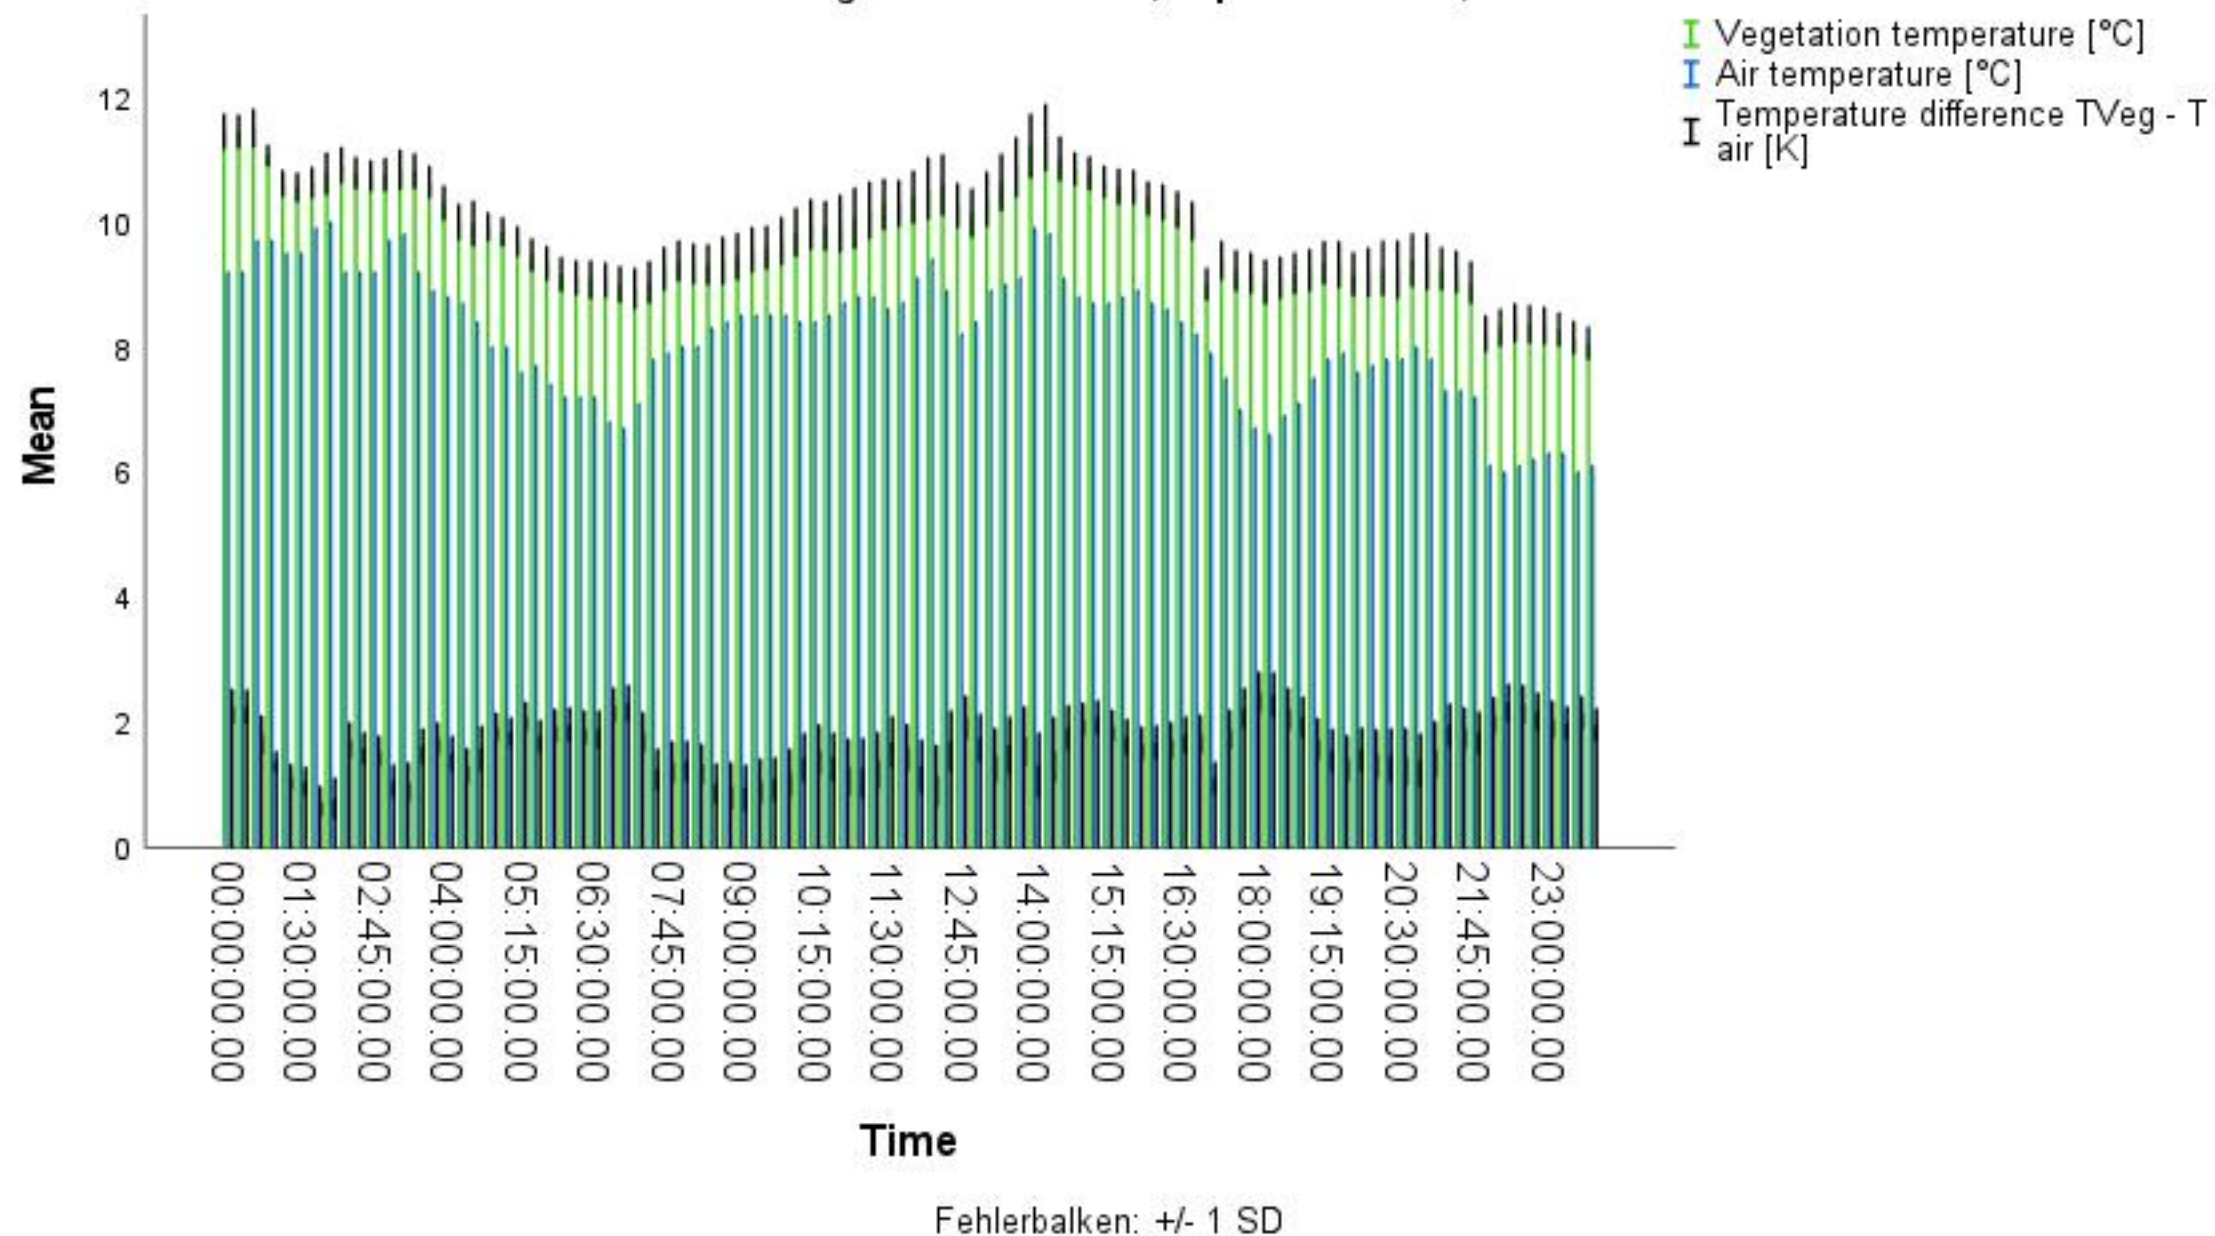

Plant: *Waldsteinia ternata*, Exposition: East, DOY: 265

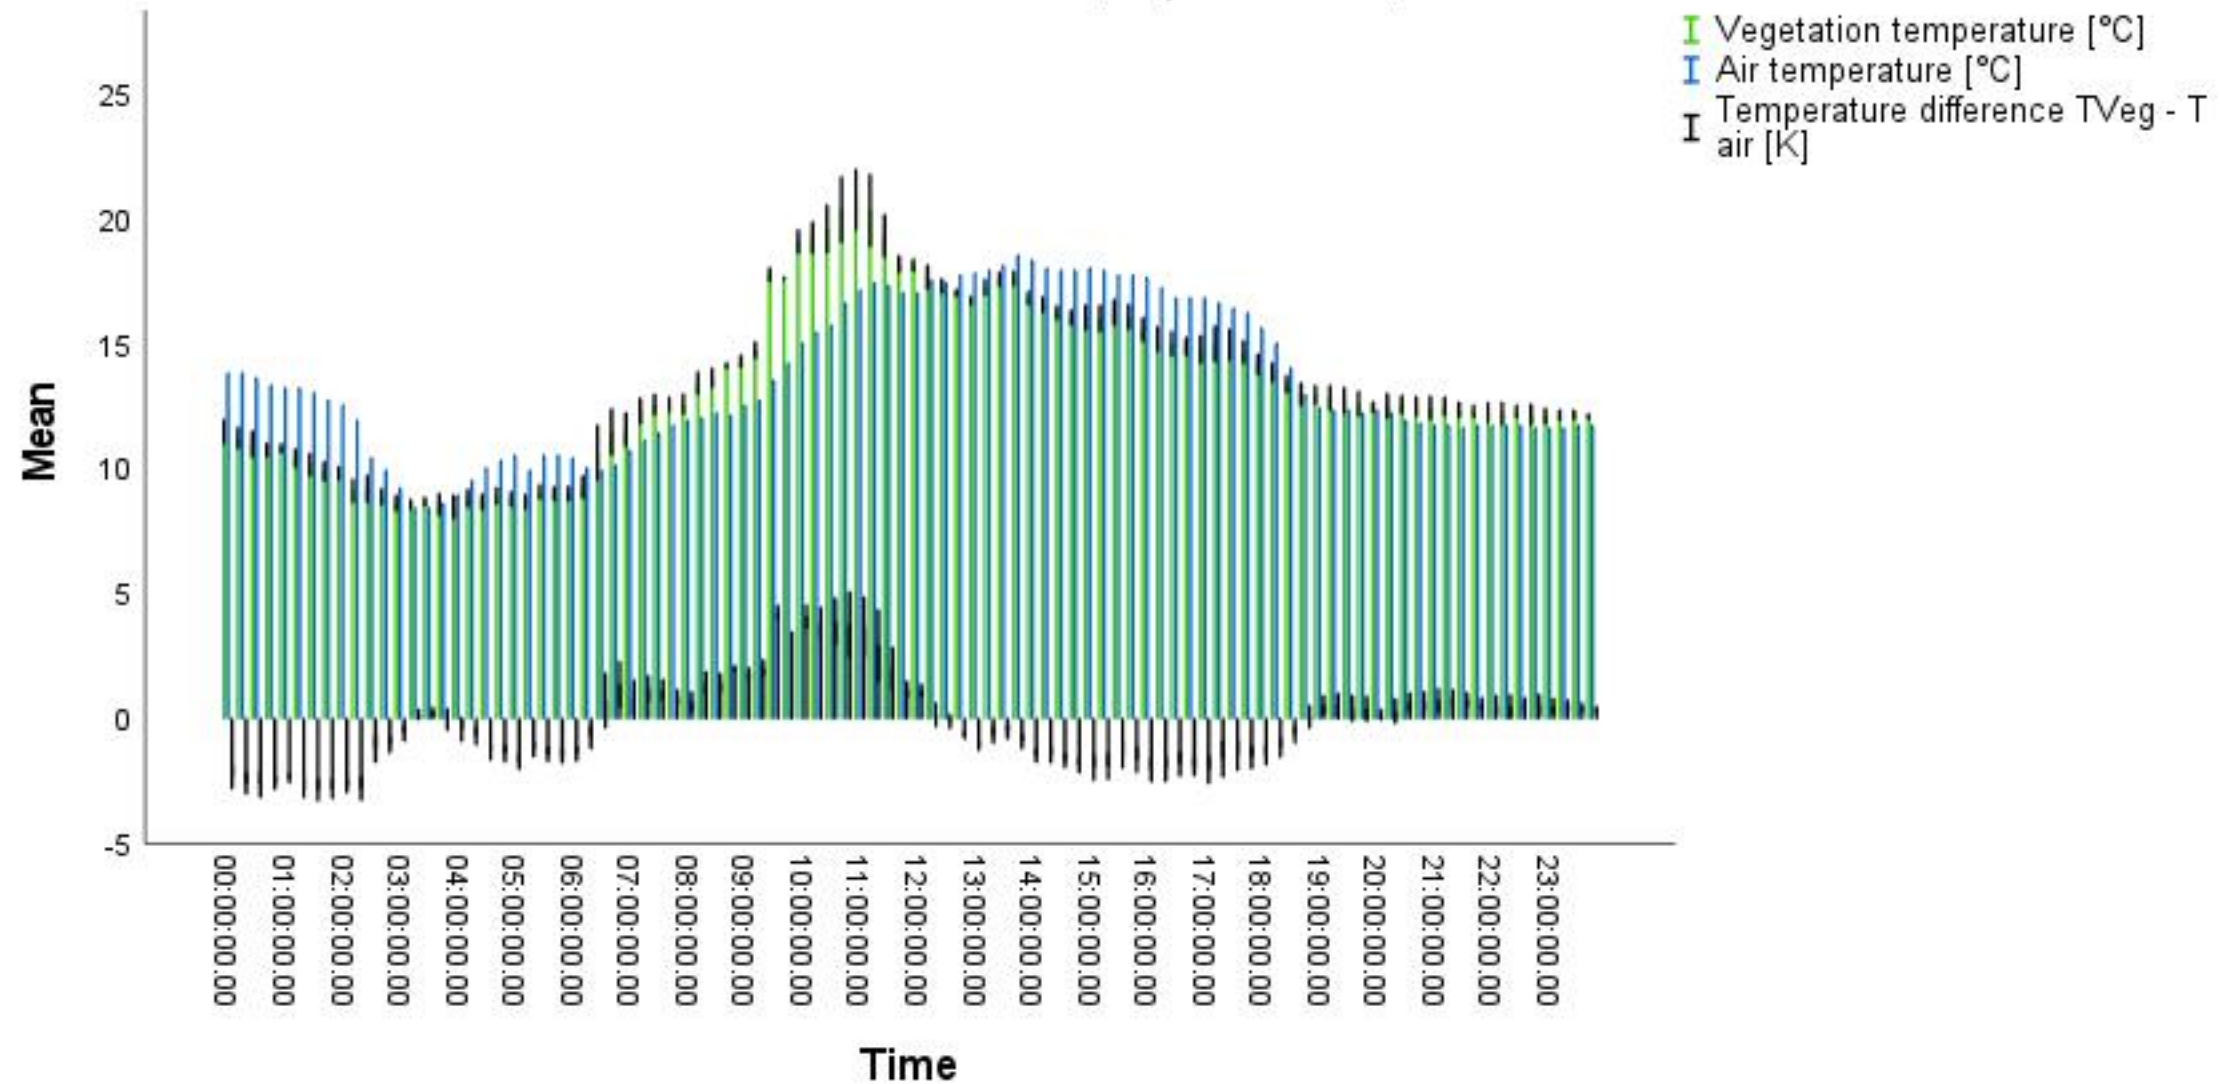

Fehlerbalken: +/- 1 SD



Plant: *Waldsteinia ternata*, Exposition: East, DOY: 266

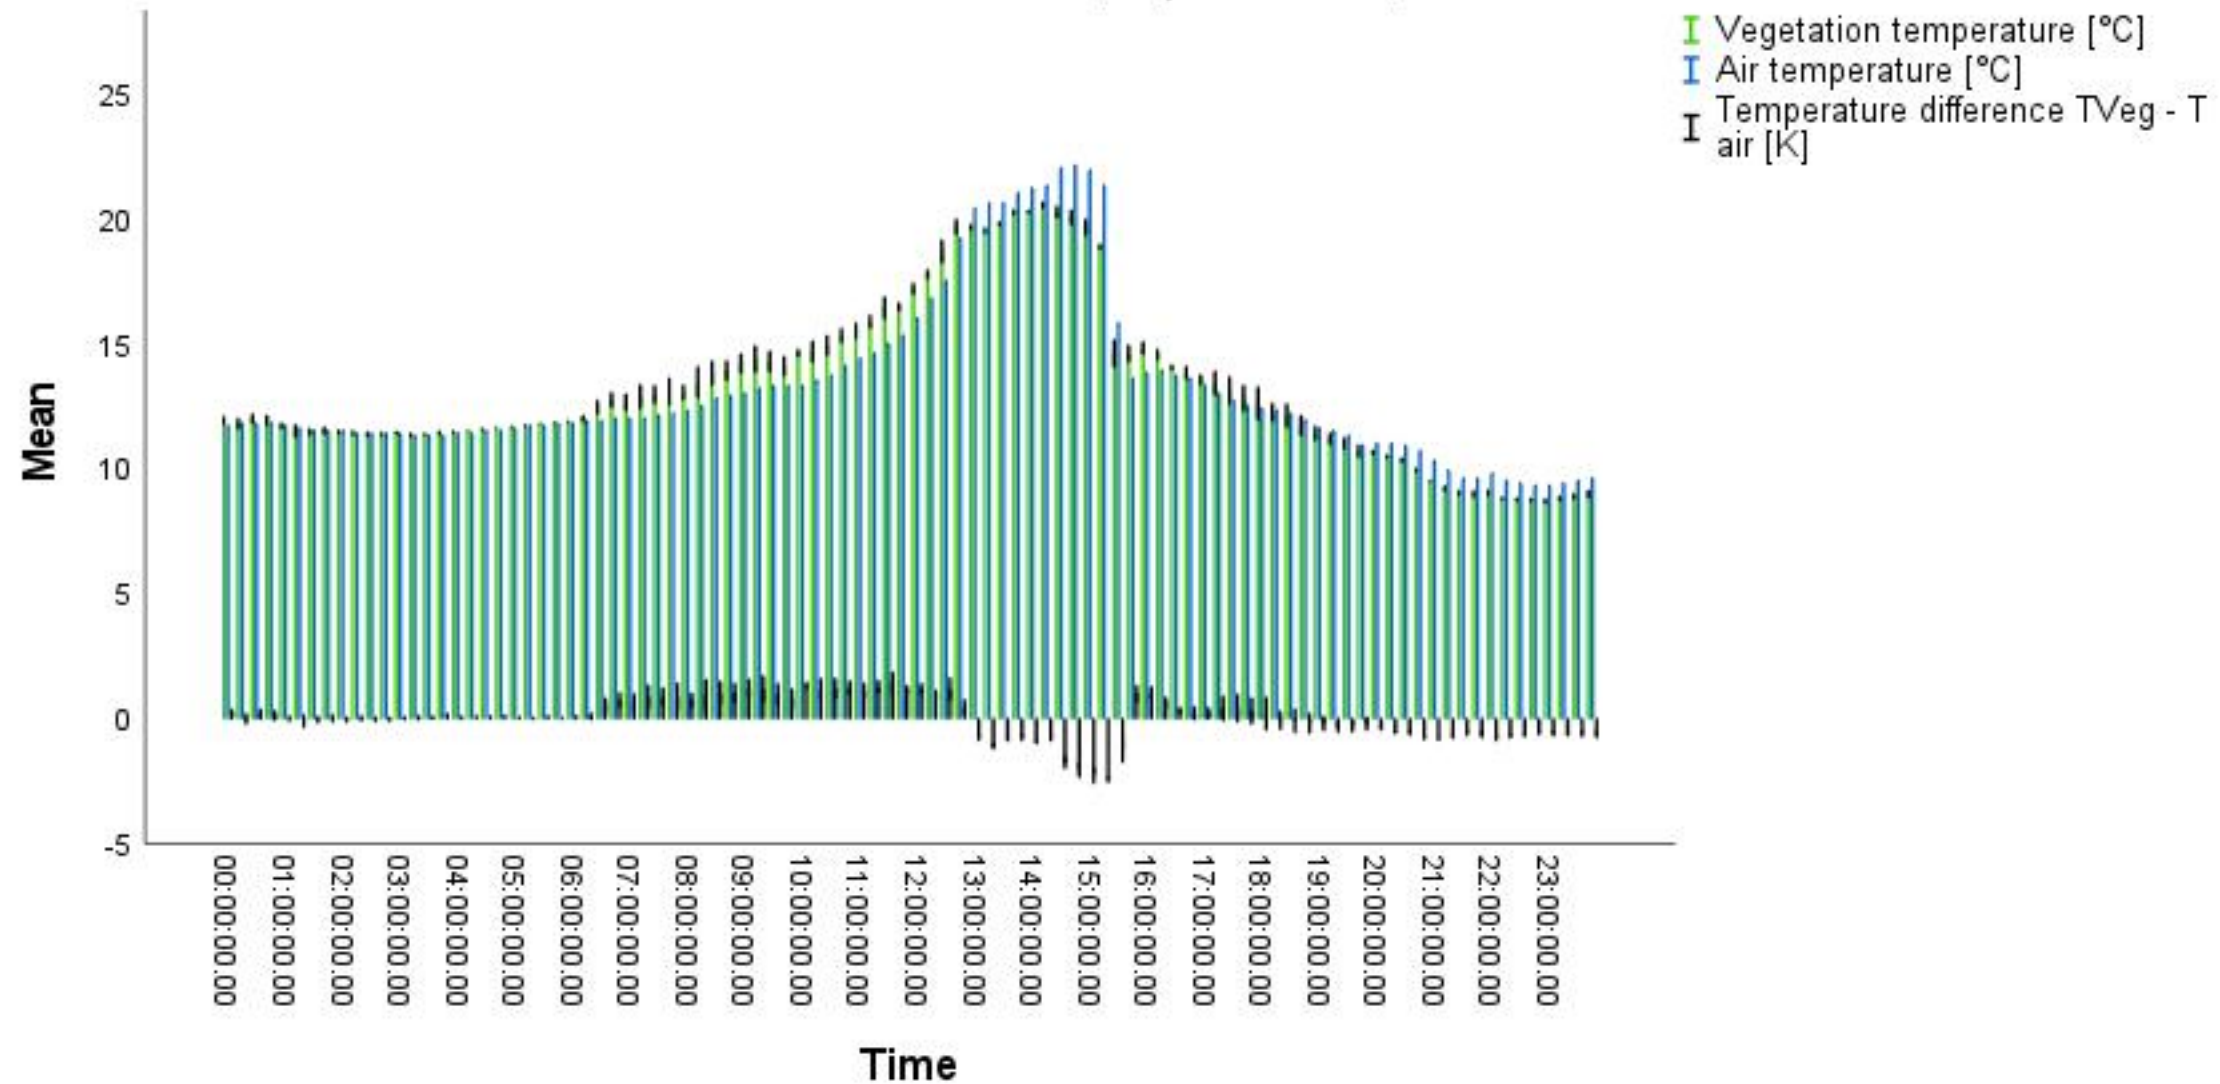

Fehlerbalken: +/- 1 SD

Plant: *Waldsteinia ternata*, Exposition: North, DOY: 311

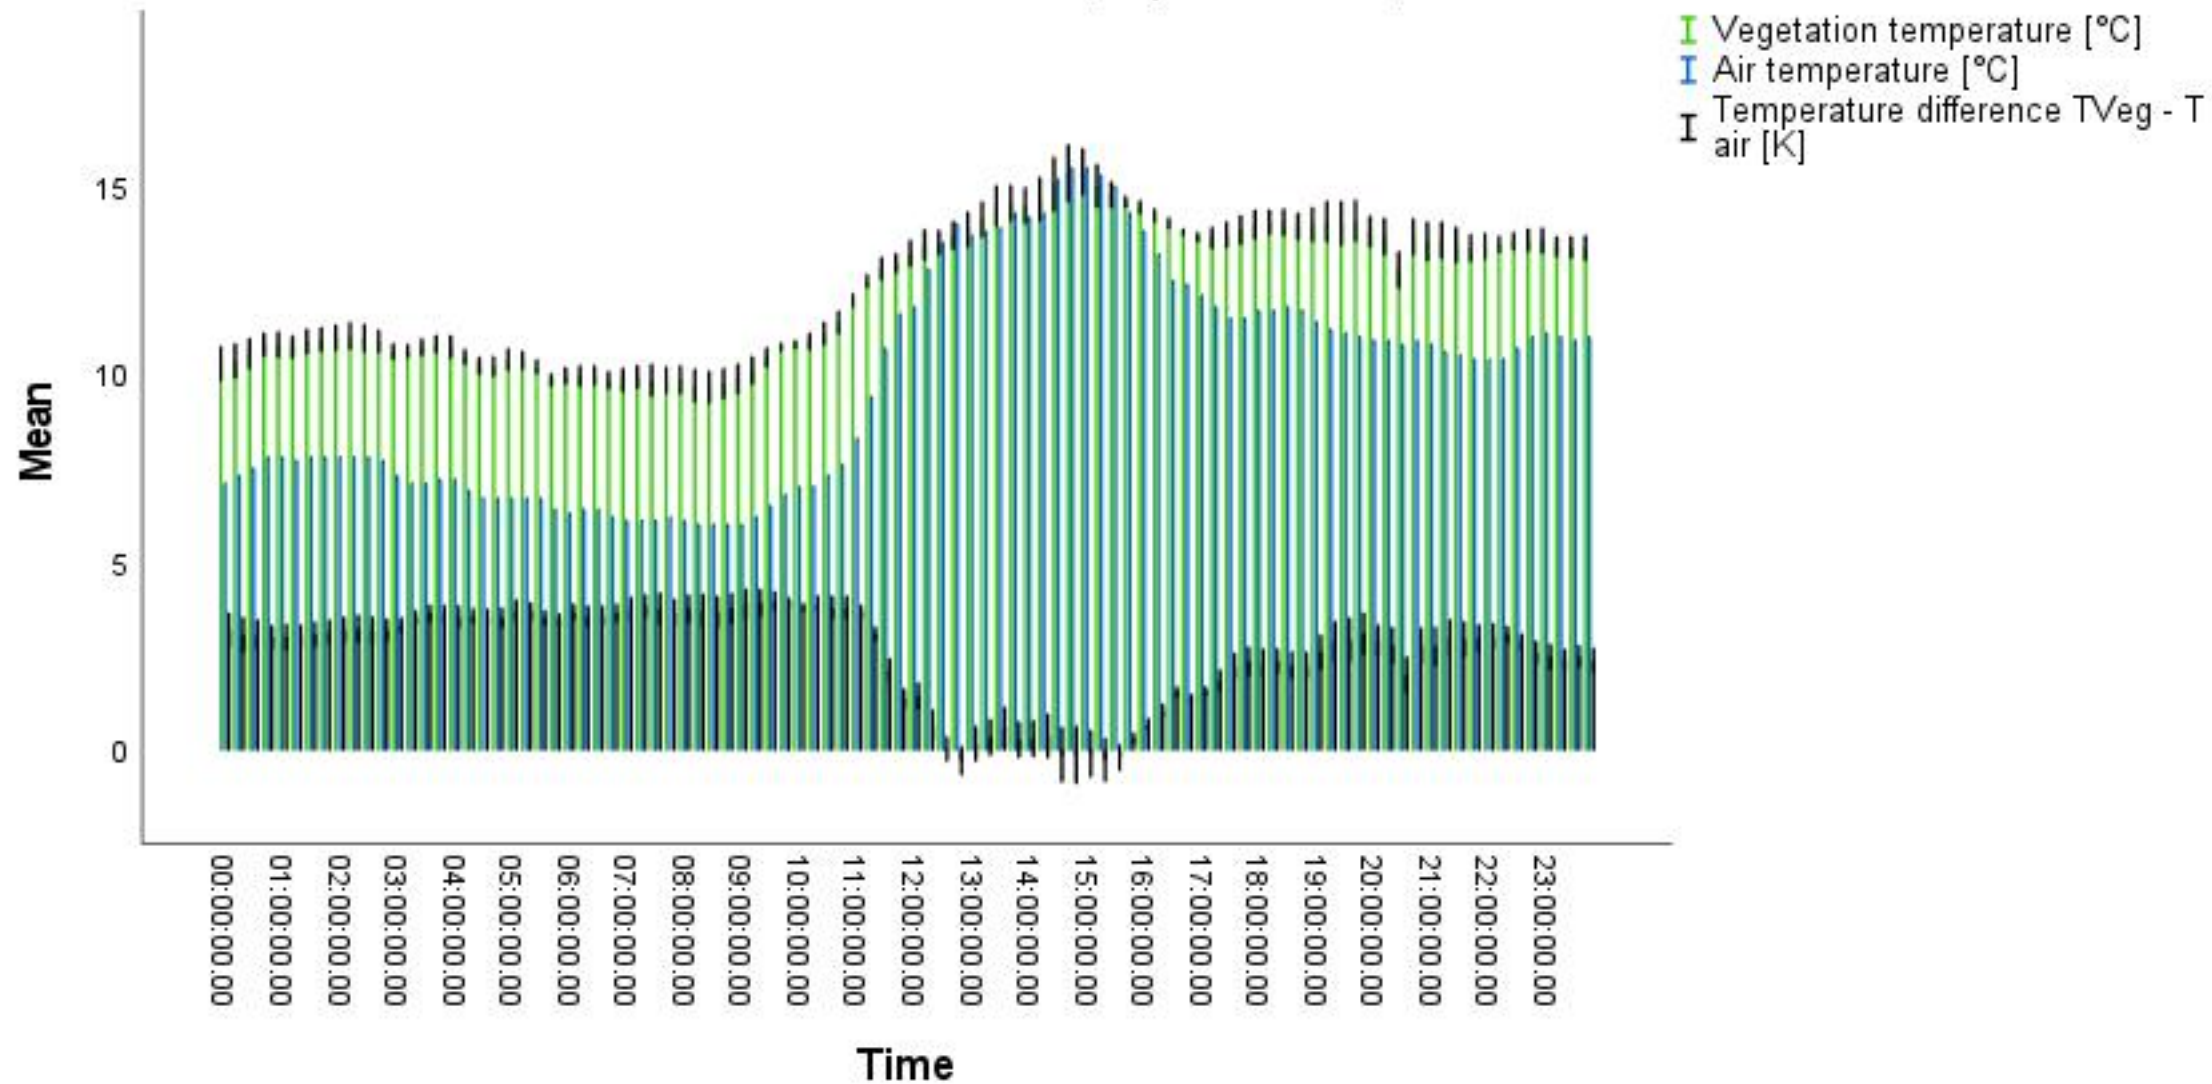

Fehlerbalken: +/- 1 SD

Plant: *Waldsteinia ternata*, Exposition: North, DOY: 312

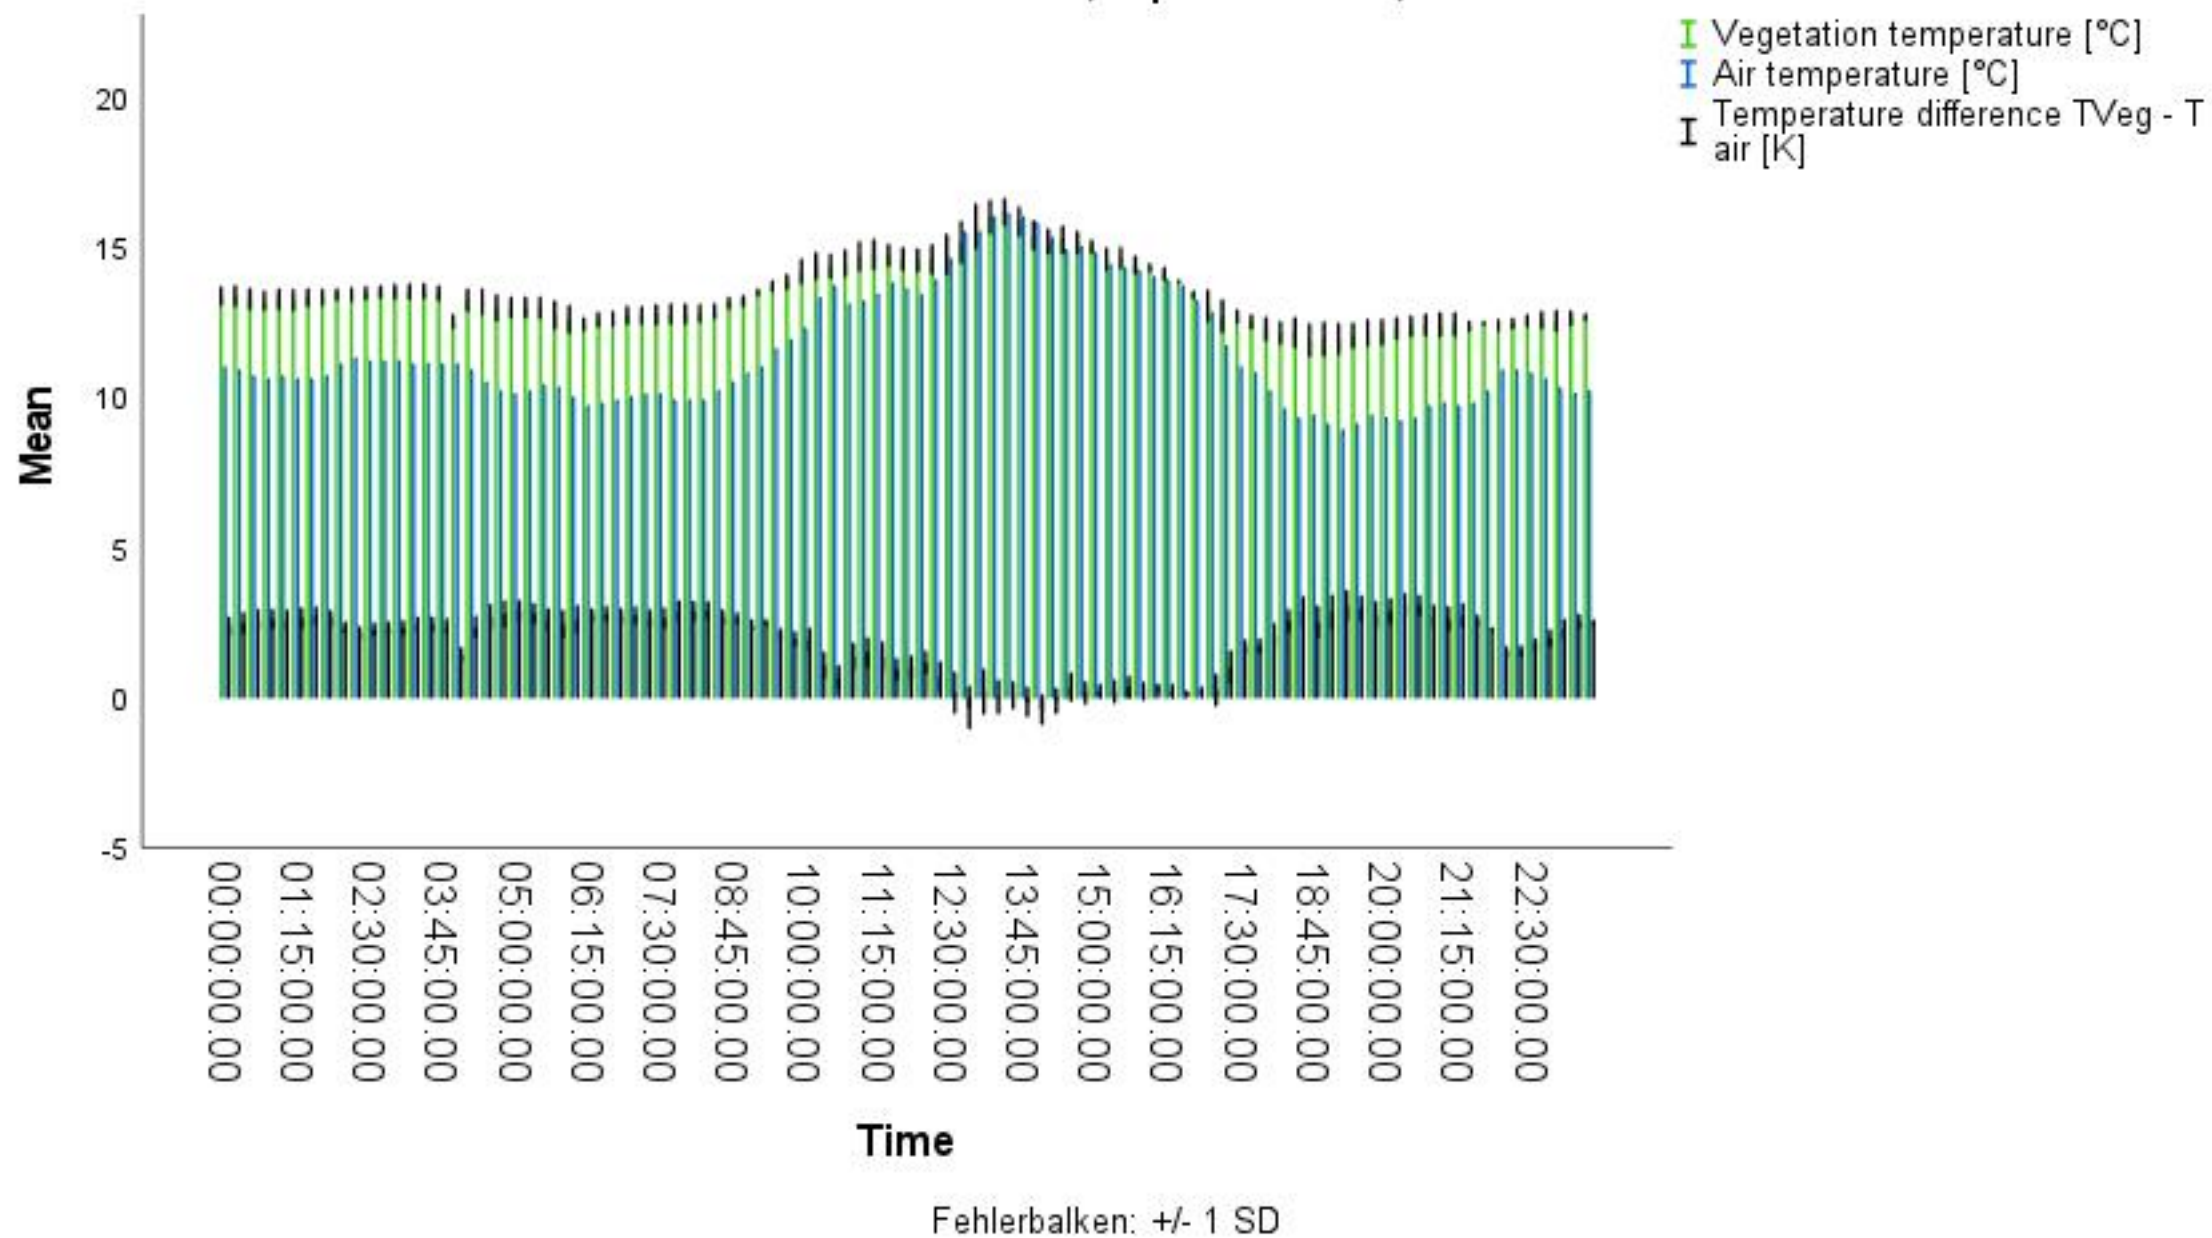

Plant: *Waldsteinia ternata*, Exposition: West, DOY: 265

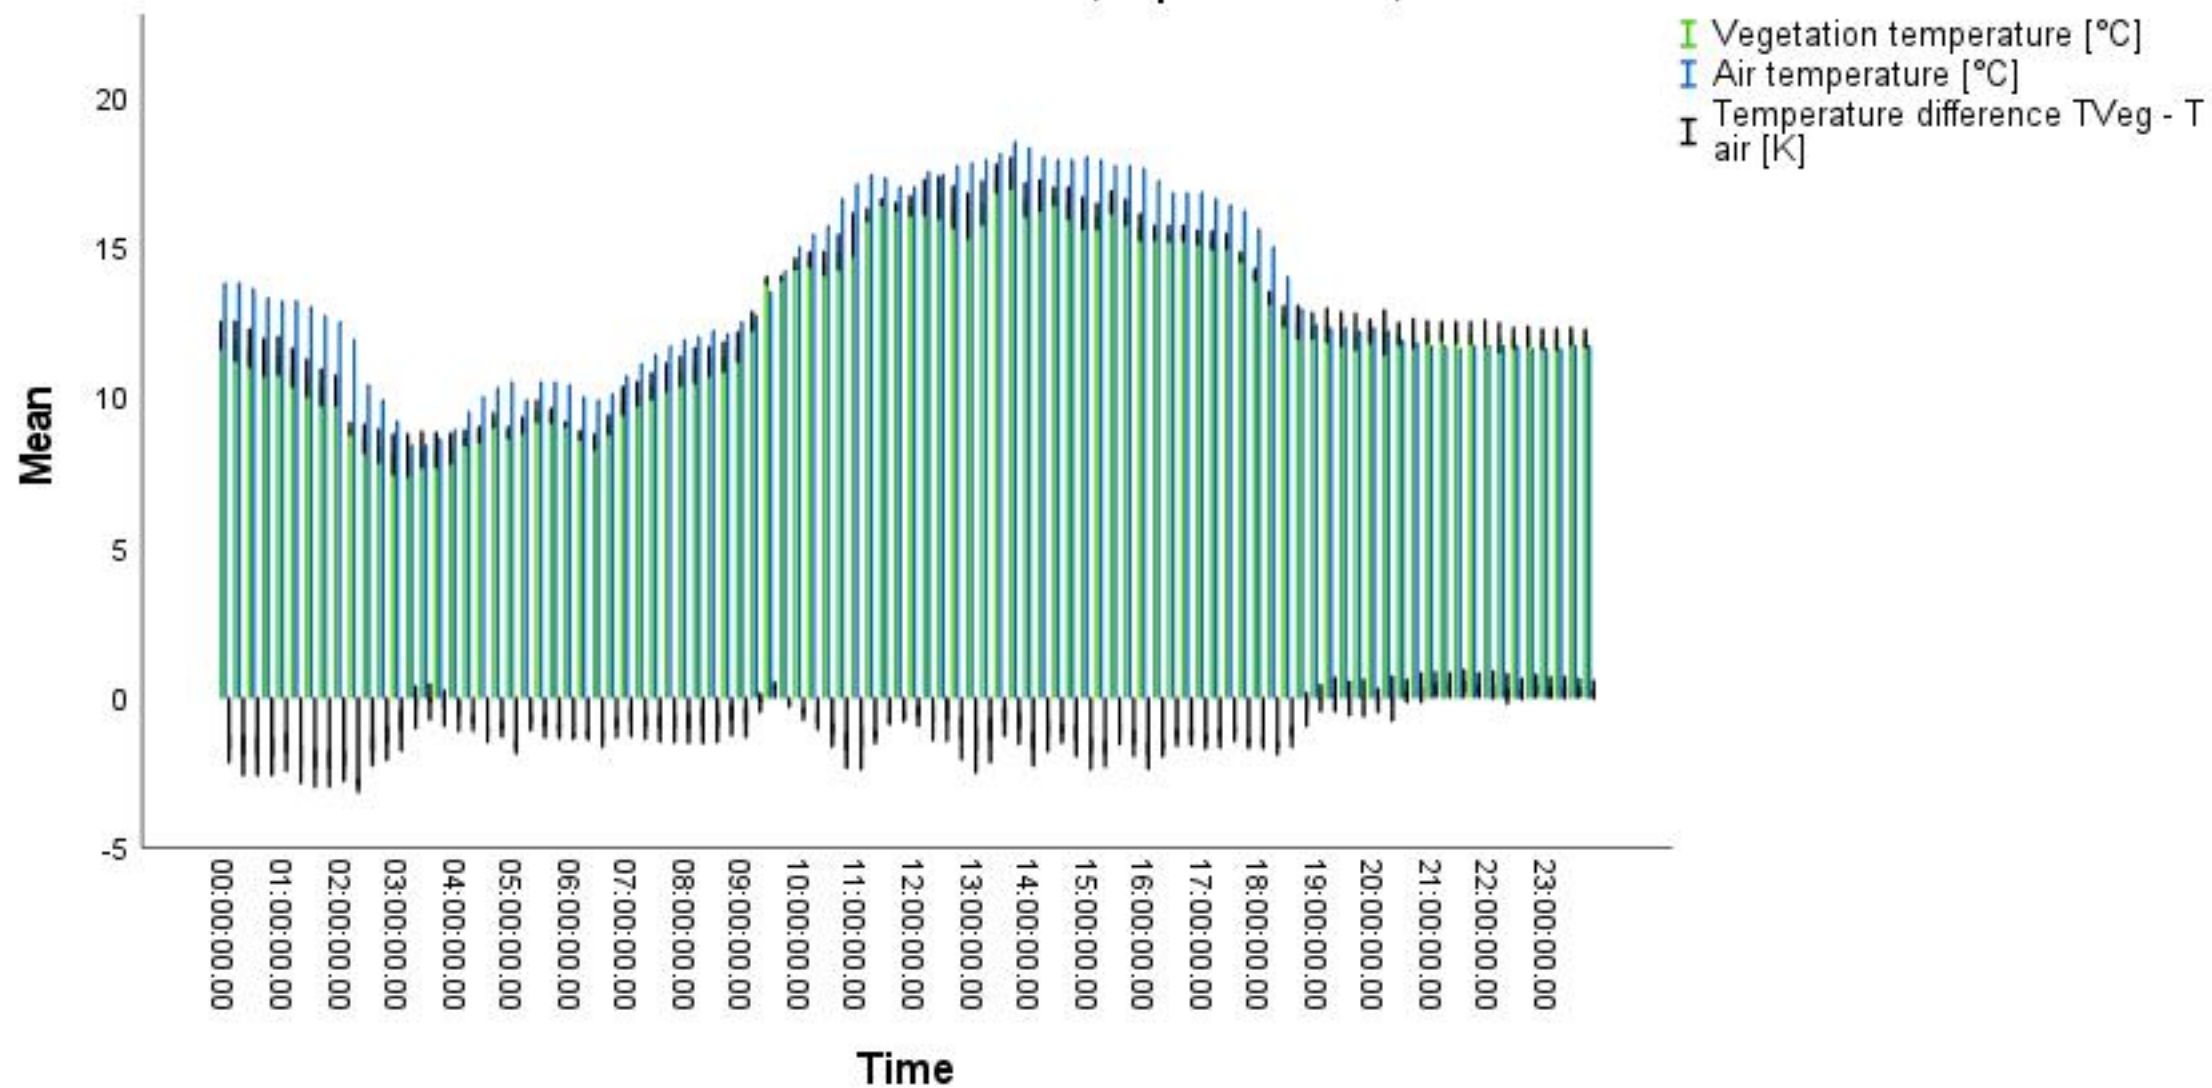

Plant: *Waldsteinia ternata*, Exposition: West, DOY: 266

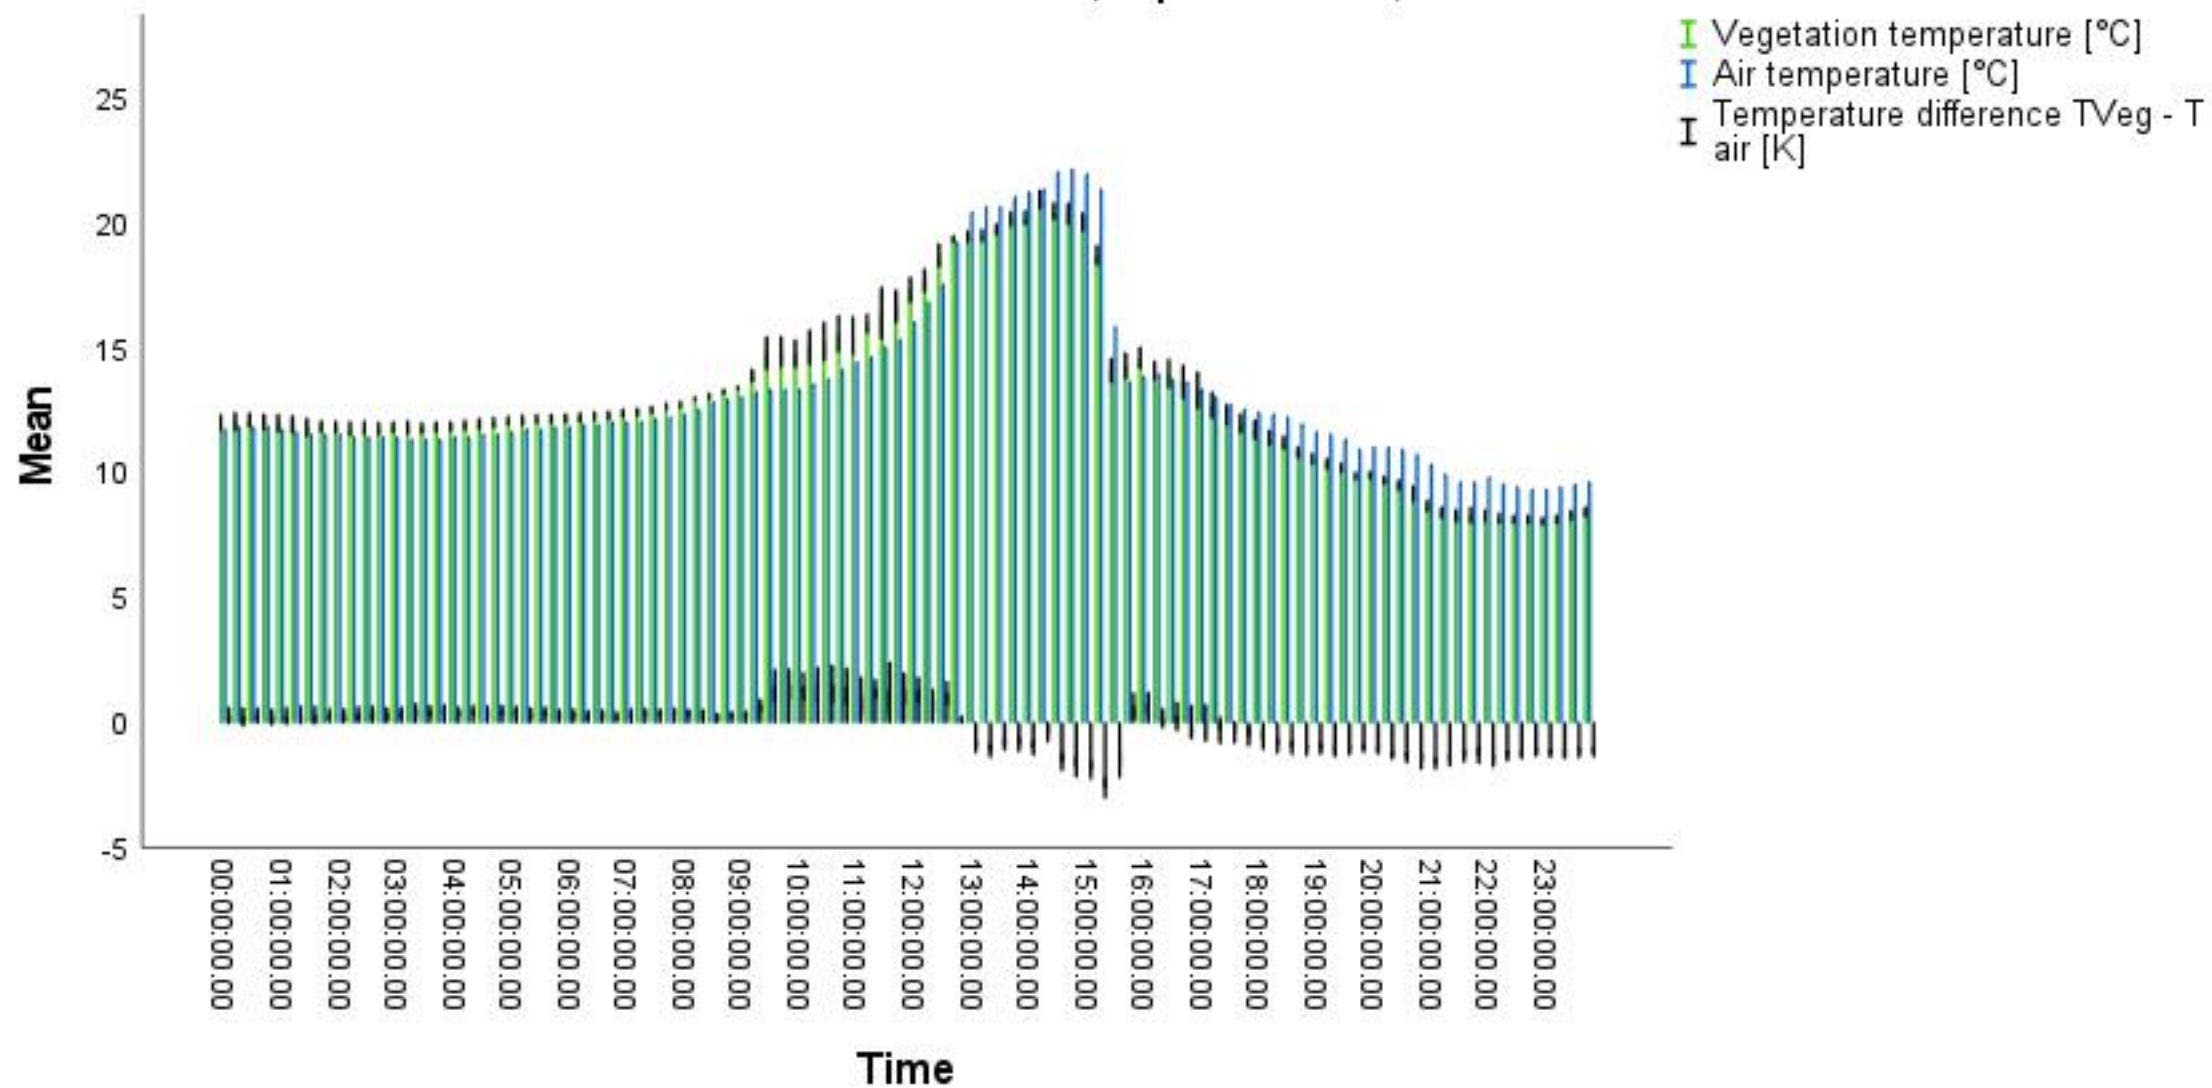

Fehlerbalken: +/- 1 SD
