# Supplementary material for: Living Wall Plants Are Affected by and Affect Temperature: How to (Not) Measure Plants’ Temperature in an Living Wall Experiment
Source: Preprints.org preprint supplement (doi:10.20944/preprints202306.0856.v1), 2023-06-12
Supplement: Supplementary file 3 [file supplementary]

| Date      | DOY    | Air temperature [°C] |     |     |         |         |
|-----------|--------|----------------------|-----|-----|---------|---------|
|           |        | Mean                 |     |     | Minimum | Maximum |
| 05-SEP-18 | 248.00 | 24.4                 | +/- | 4.8 | 17.4    | 29.8    |
| 06-SEP-18 | 249.00 | 19.6                 | +/- | 3.1 | 14.5    | 26.1    |
| 07-SEP-18 | 250.00 | 17.5                 | +/- | 2.9 | 11.4    | 22.3    |
| 08-SEP-18 | 251.00 | 15.0                 | +/- | 5.5 | 6.6     | 23.0    |
| 09-SEP-18 | 252.00 | 17.3                 | +/- | 5.9 | 9.2     | 27.3    |
| 10-SEP-18 | 253.00 | 18.3                 | +/- | 6.4 | 9.4     | 29.3    |
| 11-SEP-18 | 254.00 | 19.5                 | +/- | 6.4 | 10.4    | 29.0    |
| 12-SEP-18 | 255.00 | 20.9                 | +/- | 7.2 | 10.2    | 31.2    |
| 13-SEP-18 | 256.00 | 17.5                 | +/- | 1.2 | 15.9    | 20.3    |
| 14-SEP-18 | 257.00 | 18.1                 | +/- | 2.7 | 13.2    | 23.5    |
| 15-SEP-18 | 258.00 | 15.4                 | +/- | 4.6 | 8.2     | 22.3    |
| 16-SEP-18 | 259.00 | 16.1                 | +/- | 6.3 | 6.8     | 25.6    |
| 17-SEP-18 | 260.00 | 17.3                 | +/- | 6.9 | 7.9     | 28.1    |
| 18-SEP-18 | 261.00 | 19.9                 | +/- | 7.4 | 8.9     | 31.7    |
| 19-SEP-18 | 262.00 | 22.0                 | +/- | 5.4 | 14.0    | 29.9    |
| 20-SEP-18 | 263.00 | 20.4                 | +/- | 5.7 | 13.1    | 29.2    |
| 21-SEP-18 | 264.00 | 16.0                 | +/- | 3.2 | 10.9    | 23.6    |
| 22-SEP-18 | 265.00 | 13.5                 | +/- | 2.9 | 8.4     | 18.5    |
| 23-SEP-18 | 266.00 | 13.1                 | +/- | 3.3 | 9.3     | 22.1    |
| 24-SEP-18 | 267.00 | 11.1                 | +/- | 3.1 | 6.5     | 17.0    |
| 25-SEP-18 | 268.00 | 9.5                  | +/- | 4.3 | 4.1     | 16.2    |
| 26-SEP-18 | 269.00 | 9.6                  | +/- | 5.3 | 2.9     | 19.1    |
| 27-SEP-18 | 270.00 | 12.4                 | +/- | 6.5 | 3.9     | 23.2    |
| 28-SEP-18 | 271.00 | 12.6                 | +/- | 4.6 | 6.2     | 20.5    |
| 29-SEP-18 | 272.00 | 10.0                 | +/- | 4.6 | 3.6     | 17.0    |
| 30-SEP-18 | 273.00 | 10.2                 | +/- | 6.2 | 1.1     | 20.0    |
| 01-OCT-18 | 274.00 | 10.9                 | +/- | 2.6 | 6.5     | 16.0    |
| 02-OCT-18 | 275.00 | 8.5                  | +/- | 2.0 | 4.5     | 11.3    |
| 03-OCT-18 | 276.00 | 13.0                 | +/- | 3.4 | 5.9     | 18.2    |
| 04-OCT-18 | 277.00 | 10.6                 | +/- | 5.4 | 3.3     | 19.2    |
| 05-OCT-18 | 278.00 | 11.7                 | +/- | 6.2 | 3.3     | 21.4    |
| 06-OCT-18 | 279.00 | 13.4                 | +/- | 5.7 | 6.0     | 23.4    |
| 07-OCT-18 | 280.00 | 13.6                 | +/- | 3.5 | 8.9     | 19.2    |
| 08-OCT-18 | 281.00 | 13.3                 | +/- | 4.5 | 7.3     | 21.8    |
| 09-OCT-18 | 282.00 | 13.2                 | +/- | 4.9 | 7.5     | 22.1    |
| 10-OCT-18 | 283.00 | 14.8                 | +/- | 5.5 | 7.2     | 23.7    |
| 11-OCT-18 | 284.00 | 14.8                 | +/- | 4.5 | 7.5     | 21.5    |
| 12-OCT-18 | 285.00 | 16.3                 | +/- | 5.3 | 9.6     | 26.9    |
| 13-OCT-18 | 286.00 | 16.2                 | +/- | 5.9 | 9.0     | 26.2    |
| 14-OCT-18 | 287.00 | 15.0                 | +/- | 5.7 | 7.3     | 24.7    |
| 15-OCT-18 | 288.00 | 15.1                 | +/- | 5.8 | 8.5     | 25.8    |
| 16-OCT-18 | 289.00 | 14.7                 | +/- | 6.8 | 6.2     | 26.7    |
| 17-OCT-18 | 290.00 | 13.9                 | +/- | 5.6 | 6.5     | 24.3    |
| 18-OCT-18 | 291.00 | 14.4                 | +/- | 3.9 | 8.9     | 21.8    |
| 19-OCT-18 | 292.00 | 13.3                 | +/- | 3.5 | 8.5     | 19.2    |
| 20-OCT-18 | 293.00 | 12.6                 | +/- | 2.9 | 6.3     | 18.6    |
| 21-OCT-18 | 294.00 | 9.2                  | +/- | 4.8 | 2.3     | 17.2    |
| 22-OCT-18 | 295.00 | 8.7                  | +/- | 4.2 | 1.9     | 15.1    |

| Date      | DOY    | Air temperature [°C] |     |     |         |         |
|-----------|--------|----------------------|-----|-----|---------|---------|
|           |        | Mean                 |     |     | Minimum | Maximum |
| 23-OCT-18 | 296.00 | 8.9                  | +/- | 4.3 | 2.9     | 15.0    |
| 24-OCT-18 | 297.00 | 14.2                 | +/- | 1.2 | 12.4    | 16.9    |
| 25-OCT-18 | 298.00 | 13.6                 | +/- | 1.5 | 11.2    | 17.1    |
| 26-OCT-18 | 299.00 | 10.7                 | +/- | 1.0 | 7.1     | 12.6    |
| 27-OCT-18 | 300.00 | 7.1                  | +/- | 2.0 | 3.3     | 11.1    |
| 28-OCT-18 | 301.00 | 6.6                  | +/- | 0.5 | 4.8     | 7.6     |
| 29-OCT-18 | 302.00 | 6.6                  | +/- | 0.5 | 5.5     | 7.8     |
| 30-OCT-18 | 303.00 | 6.2                  | +/- | 0.9 | 4.3     | 7.7     |
| 31-OCT-18 | 304.00 | 5.8                  | +/- | 3.0 | 0.1     | 9.6     |
| 01-NOV-18 | 305.00 | 6.1                  | +/- | 1.9 | 3.3     | 9.7     |
| 02-NOV-18 | 306.00 | 9.5                  | +/- | 2.7 | 4.7     | 14.7    |
| 03-NOV-18 | 307.00 | 8.1                  | +/- | 2.9 | 3.6     | 14.2    |
| 04-NOV-18 | 308.00 | 9.5                  | +/- | 2.3 | 6.1     | 12.0    |
| 05-NOV-18 | 309.00 | 10.3                 | +/- | 2.5 | 4.9     | 14.1    |
| 06-NOV-18 | 310.00 | 8.3                  | +/- | 3.6 | 4.1     | 16.0    |
| 07-NOV-18 | 311.00 | 9.3                  | +/- | 2.9 | 6.0     | 15.5    |
| 08-NOV-18 | 312.00 | 11.5                 | +/- | 2.0 | 8.9     | 16.1    |
| 09-NOV-18 | 313.00 | 10.5                 | +/- | 1.9 | 6.4     | 13.3    |
| 10-NOV-18 | 314.00 | 10.4                 | +/- | 1.5 | 8.4     | 12.7    |
| 11-NOV-18 | 315.00 | 12.9                 | +/- | 1.9 | 10.6    | 17.6    |
| 12-NOV-18 | 316.00 | 12.4                 | +/- | 2.5 | 8.8     | 17.1    |
| 13-NOV-18 | 317.00 | 11.0                 | +/- | 2.9 | 4.8     | 15.2    |
| 14-NOV-18 | 318.00 | 5.7                  | +/- | 1.4 | 3.5     | 7.5     |
| 15-NOV-18 | 319.00 | 6.3                  | +/- | 0.4 | 5.7     | 7.2     |
| 16-NOV-18 | 320.00 | 7.0                  | +/- | 1.7 | 4.4     | 10.6    |
| 17-NOV-18 | 321.00 | 6.3                  | +/- | 3.1 | -0.3    | 11.5    |
| 18-NOV-18 | 322.00 | 4.5                  | +/- | 3.5 | -0.5    | 10.6    |
| 19-NOV-18 | 323.00 | 4.4                  | +/- | 1.4 | 1.4     | 6.1     |
| 20-NOV-18 | 324.00 | 3.9                  | +/- | 0.6 | 2.9     | 4.9     |
| 21-NOV-18 | 325.00 | 2.7                  | +/- | 1.5 | -1.1    | 4.0     |
| 22-NOV-18 | 326.00 | 2.6                  | +/- | 2.1 | -2.1    | 5.5     |
| 23-NOV-18 | 327.00 | 1.8                  | +/- | 3.8 | -4.2    | 7.3     |
| 24-NOV-18 | 328.00 | 4.2                  | +/- | 0.9 | 2.9     | 5.8     |
| 25-NOV-18 | 329.00 | 6.0                  | +/- | 1.3 | 4.6     | 9.4     |
| 26-NOV-18 | 330.00 | 6.9                  | +/- | 0.7 | 5.4     | 8.2     |
| 27-NOV-18 | 331.00 | 4.2                  | +/- | 0.6 | 3.1     | 5.6     |
| 28-NOV-18 | 332.00 | 4.0                  | +/- | 1.0 | 2.3     | 5.7     |
| 29-NOV-18 | 333.00 | 4.0                  | +/- | 0.9 | 1.8     | 5.3     |
| 30-NOV-18 | 334.00 | 4.5                  | +/- | 1.3 | 1.5     | 5.8     |
| 01-DEC-18 | 335.00 | 6.4                  | +/- | 2.5 | 2.0     | 10.7    |
| 02-DEC-18 | 336.00 | 10.3                 | +/- | 1.8 | 8.3     | 14.3    |
| 03-DEC-18 | 337.00 | 11.1                 | +/- | 0.8 | 9.6     | 13.1    |
| 04-DEC-18 | 338.00 | 7.2                  | +/- | 3.1 | 1.4     | 11.3    |
| 05-DEC-18 | 339.00 | 3.2                  | +/- | 1.8 | 0.9     | 6.0     |
| 06-DEC-18 | 340.00 | 7.5                  | +/- | 2.1 | 5.2     | 11.2    |
| 07-DEC-18 | 341.00 | 10.9                 | +/- | 1.2 | 8.1     | 12.1    |
| 08-DEC-18 | 342.00 | 7.8                  | +/- | 0.9 | 6.3     | 9.3     |
| 09-DEC-18 | 343.00 | 8.2                  | +/- | 1.0 | 6.0     | 10.0    |

| Date      | DOY    | Air temperature [°C] |     |     |         |         |
|-----------|--------|----------------------|-----|-----|---------|---------|
|           |        | Mean                 |     |     | Minimum | Maximum |
| 10-DEC-18 | 344.00 | 5.6                  | +/- | 1.0 | 4.1     | 8.2     |
| 11-DEC-18 | 345.00 | 3.9                  | +/- | 1.0 | 1.5     | 6.9     |
| 12-DEC-18 | 346.00 | 3.7                  | +/- | 1.2 | 1.3     | 6.2     |
| 13-DEC-18 | 347.00 | 1.9                  | +/- | 0.5 | 0.9     | 2.9     |
| 14-DEC-18 | 348.00 | 1.0                  | +/- | 0.3 | 0.3     | 1.4     |
| 15-DEC-18 | 349.00 | 0.7                  | +/- | 0.4 | -0.4    | 1.3     |
| 16-DEC-18 | 350.00 | -0.8                 | +/- | 0.8 | -2.4    | 0.4     |
| 17-DEC-18 | 351.00 | 1.6                  | +/- | 1.0 | 0.4     | 3.8     |
| 18-DEC-18 | 352.00 | 2.7                  | +/- | 1.6 | 0.2     | 6.4     |
| 19-DEC-18 | 353.00 | 3.5                  | +/- | 0.8 | 2.3     | 4.8     |
| 20-DEC-18 | 354.00 | 5.5                  | +/- | 1.4 | 4.0     | 8.5     |
| 21-DEC-18 | 355.00 | 9.9                  | +/- | 2.5 | 6.7     | 13.6    |
| 22-DEC-18 | 356.00 | 11.5                 | +/- | 1.3 | 6.8     | 13.6    |
| 23-DEC-18 | 357.00 | 8.2                  | +/- | 1.8 | 5.7     | 13.7    |
| 24-DEC-18 | 358.00 | 5.8                  | +/- | 3.1 | 0.2     | 13.5    |
| 25-DEC-18 | 359.00 | 0.1                  | +/- | 2.4 | -2.5    | 6.2     |
| 26-DEC-18 | 360.00 | -2.6                 | +/- | 0.7 | -4.2    | -1.7    |
| 27-DEC-18 | 361.00 | -1.5                 | +/- | 0.6 | -2.2    | -0.4    |
| 28-DEC-18 | 362.00 | -0.2                 | +/- | 0.7 | -1.0    | 2.0     |
| 29-DEC-18 | 363.00 | 1.8                  | +/- | 2.0 | -0.9    | 5.8     |
| 30-DEC-18 | 364.00 | 7.4                  | +/- | 0.8 | 5.6     | 8.4     |
| 31-DEC-18 | 365.00 | 7.7                  | +/- | 1.4 | 5.6     | 10.2    |
| 01-JAN-19 | 1.00   | 7.1                  | +/- | 0.7 | 4.8     | 8.4     |
| 02-JAN-19 | 2.00   | 3.4                  | +/- | 1.9 | -1.2    | 6.0     |
| 03-JAN-19 | 3.00   | 1.3                  | +/- | 2.5 | -3.0    | 4.1     |
| 04-JAN-19 | 4.00   | 3.2                  | +/- | 1.5 | -0.2    | 5.4     |
| 05-JAN-19 | 5.00   | 5.8                  | +/- | 1.5 | 3.6     | 7.5     |
| 06-JAN-19 | 6.00   | 6.0                  | +/- | 0.4 | 4.9     | 6.6     |
| 07-JAN-19 | 7.00   | 5.5                  | +/- | 0.8 | 4.7     | 8.3     |
| 08-JAN-19 | 8.00   | 6.2                  | +/- | 0.6 | 4.8     | 7.5     |
| 09-JAN-19 | 9.00   | 3.7                  | +/- | 0.7 | 2.5     | 5.5     |
| 10-JAN-19 | 10.00  | 1.5                  | +/- | 1.0 | -0.4    | 2.6     |
