# Supplementary material for: Living Wall Plants Are Affected by and Affect Temperature: How to (Not) Measure Plants’ Temperature in an Living Wall Experiment
Source: Preprints.org preprint supplement (doi:10.20944/preprints202306.0856.v1), 2023-06-12
Supplement: Supplementary file 4 [file supplementary]

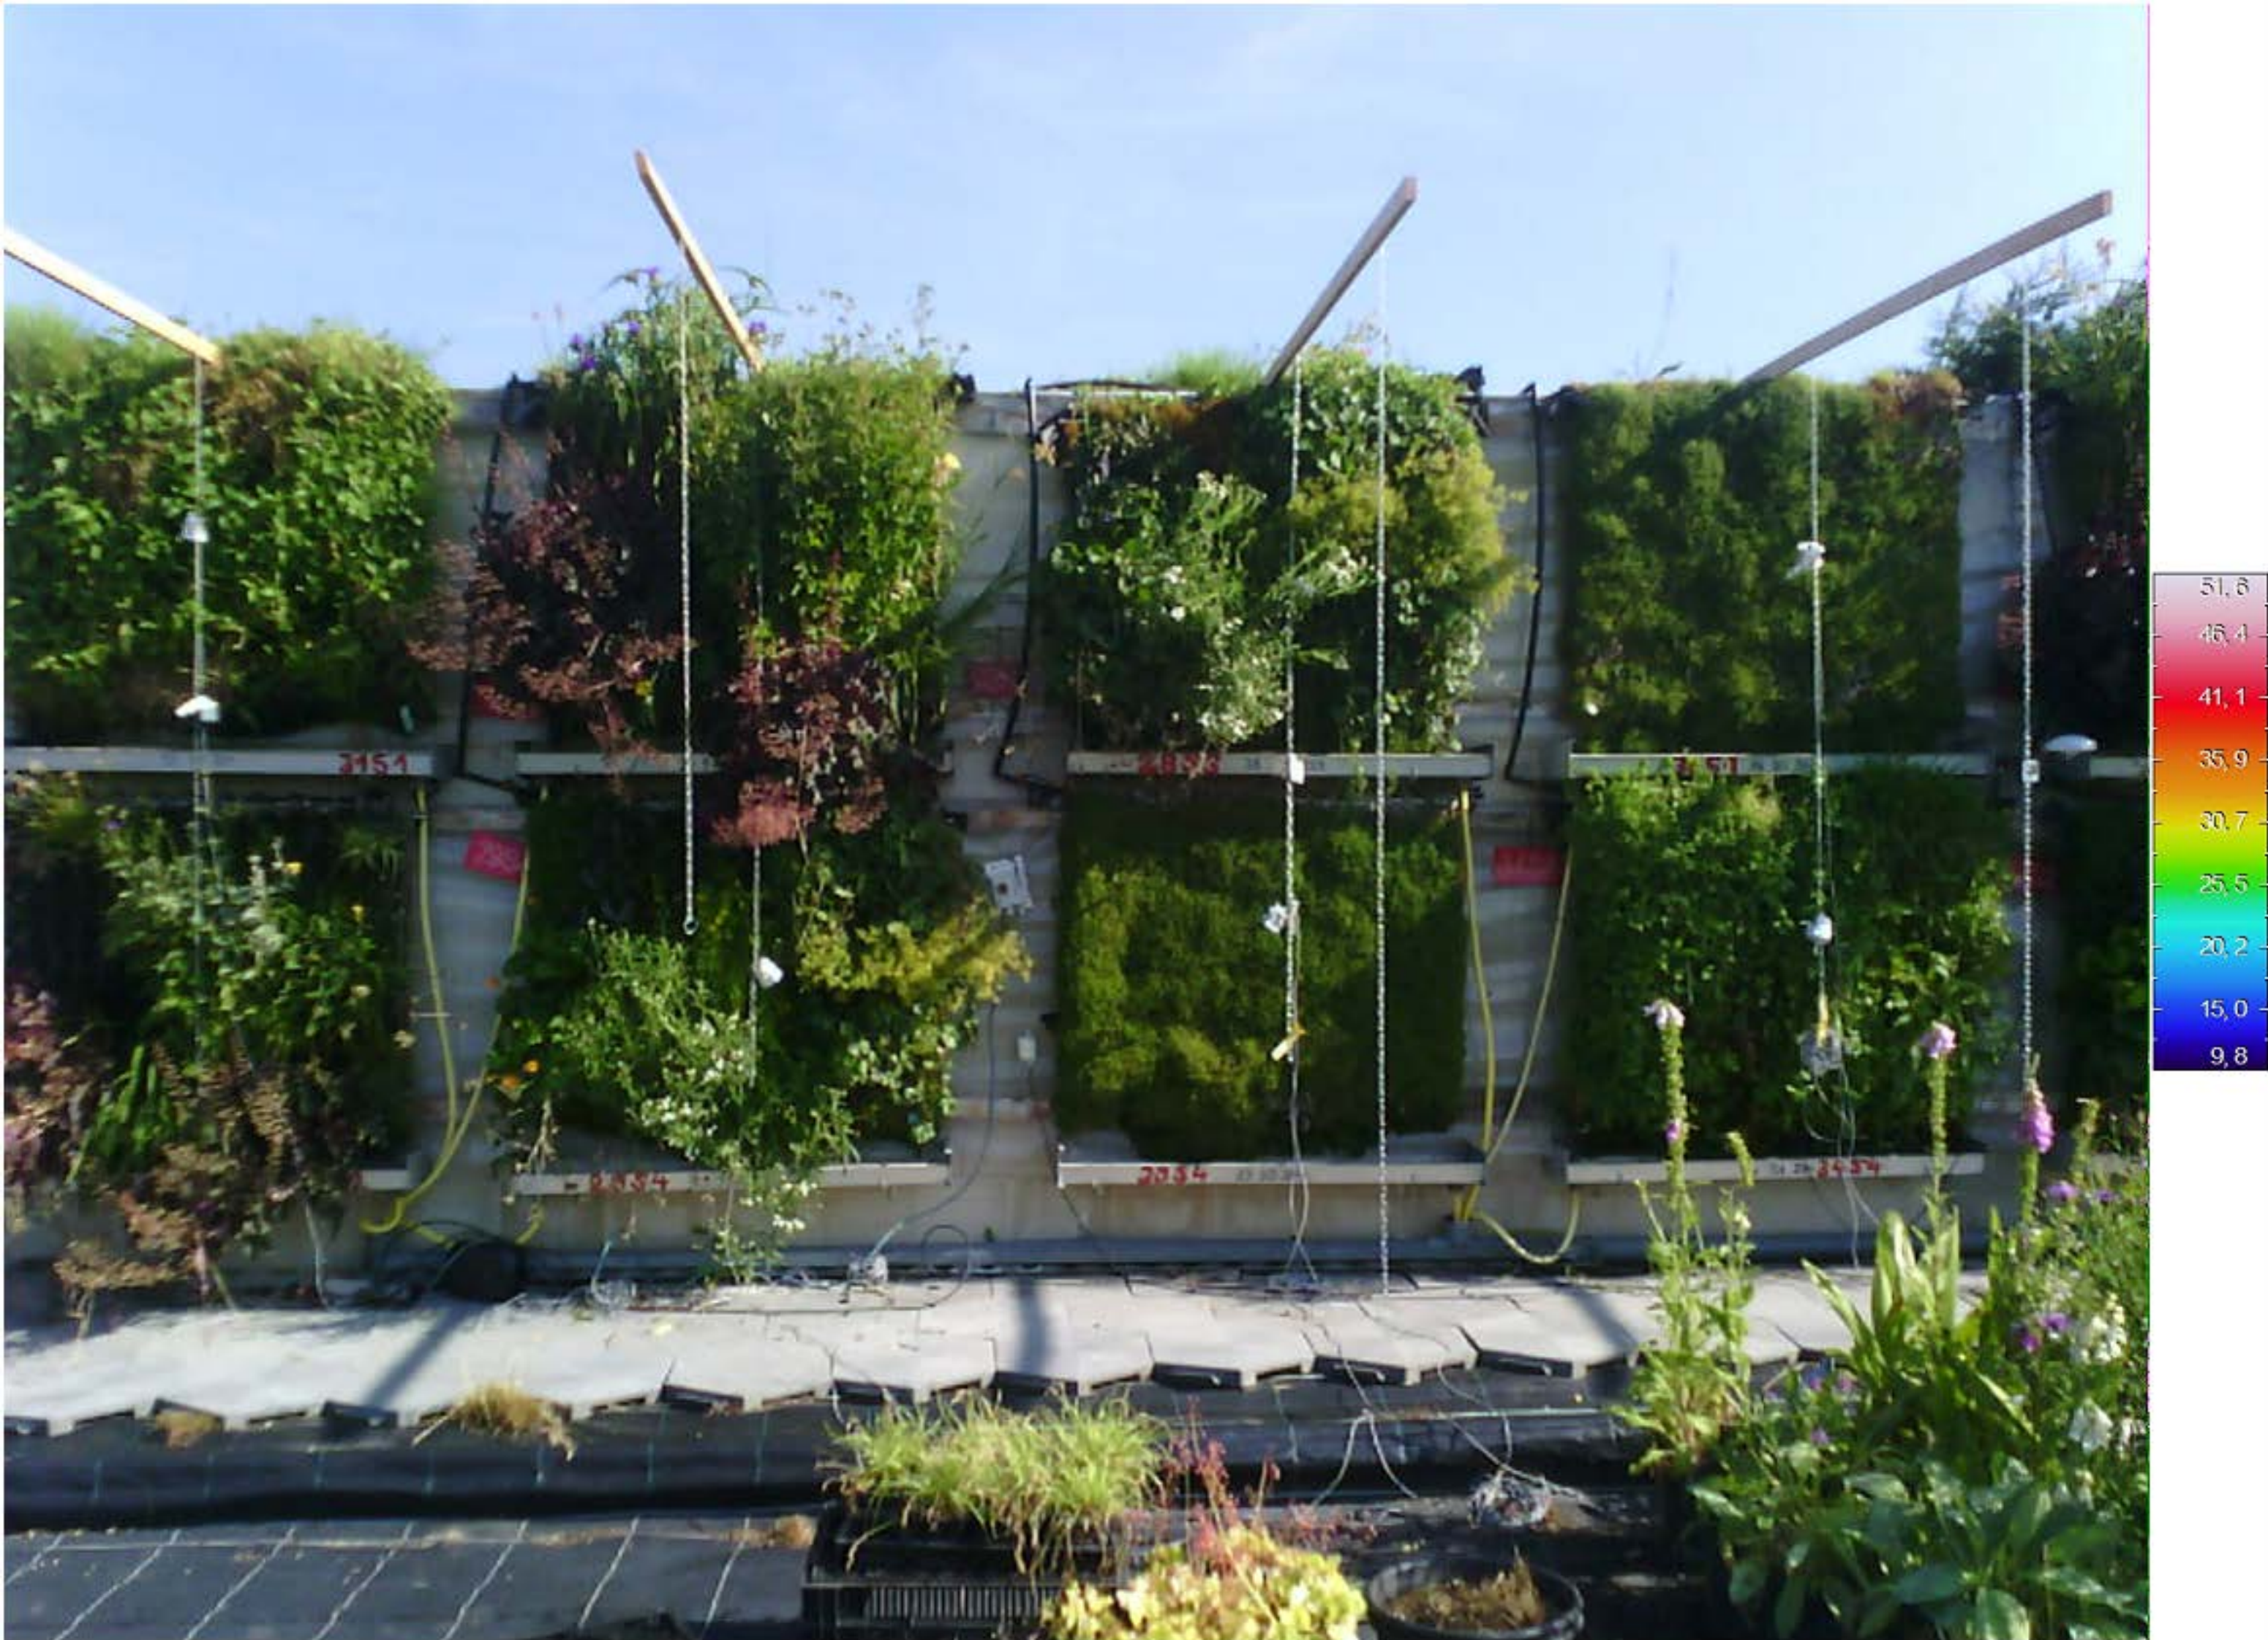

DateinameT01977VB.JPG

Messtag:2023/05/19

Messzeit:17:58:15



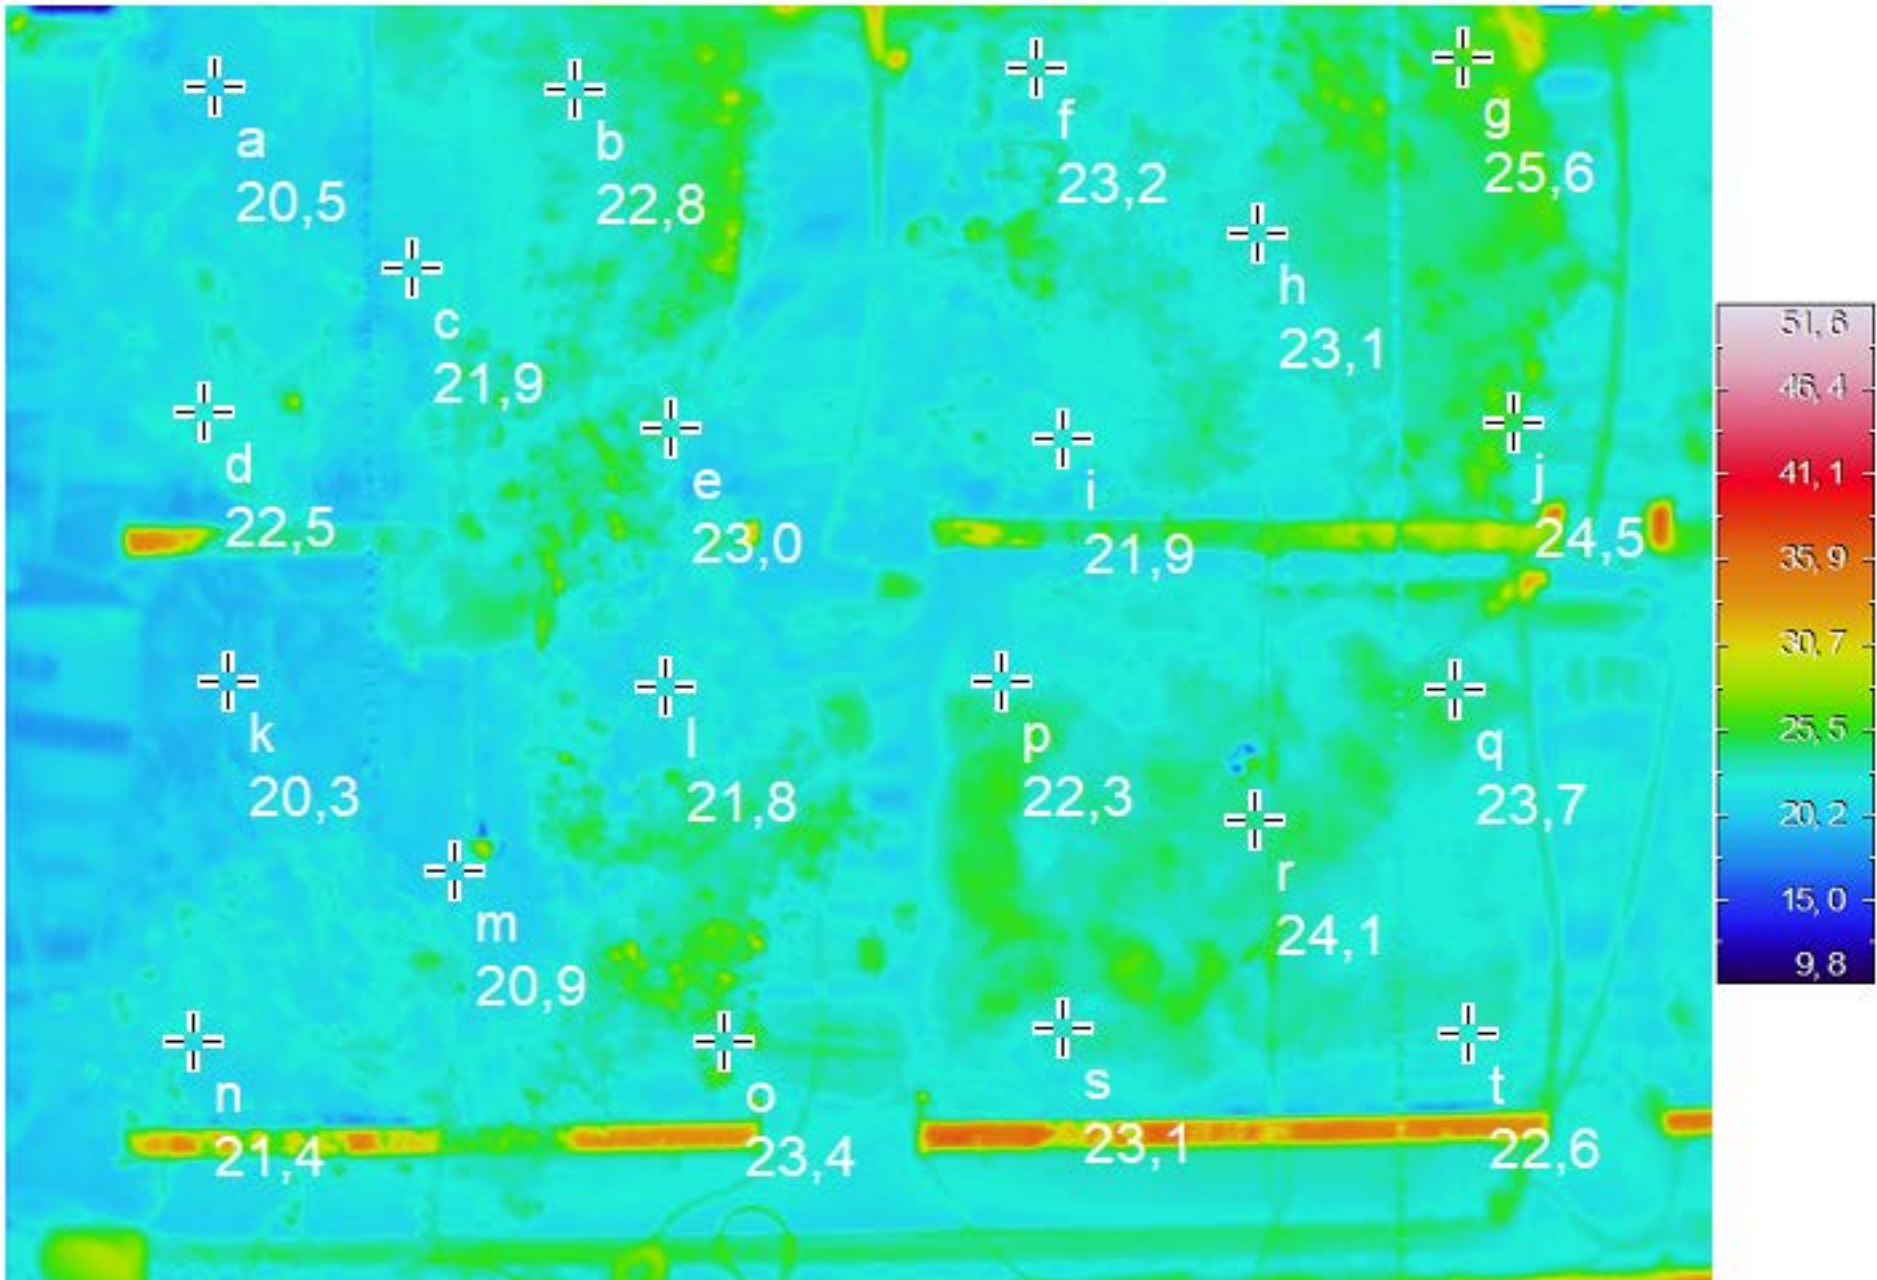

DateinameT01977IR.JPG  
Messtag:2019/06/18  
Messzeit:09:13:53  
Kommentar:  
Kameramodell:R500P  
Range:1[-20,0C-60,0C]  
BildmodusMEDx1,00  
Externes Objektiv:Standard  
Emissionsgrad:1.00  
Ambient Temp: 24,9IC  
IR Bildx1,00



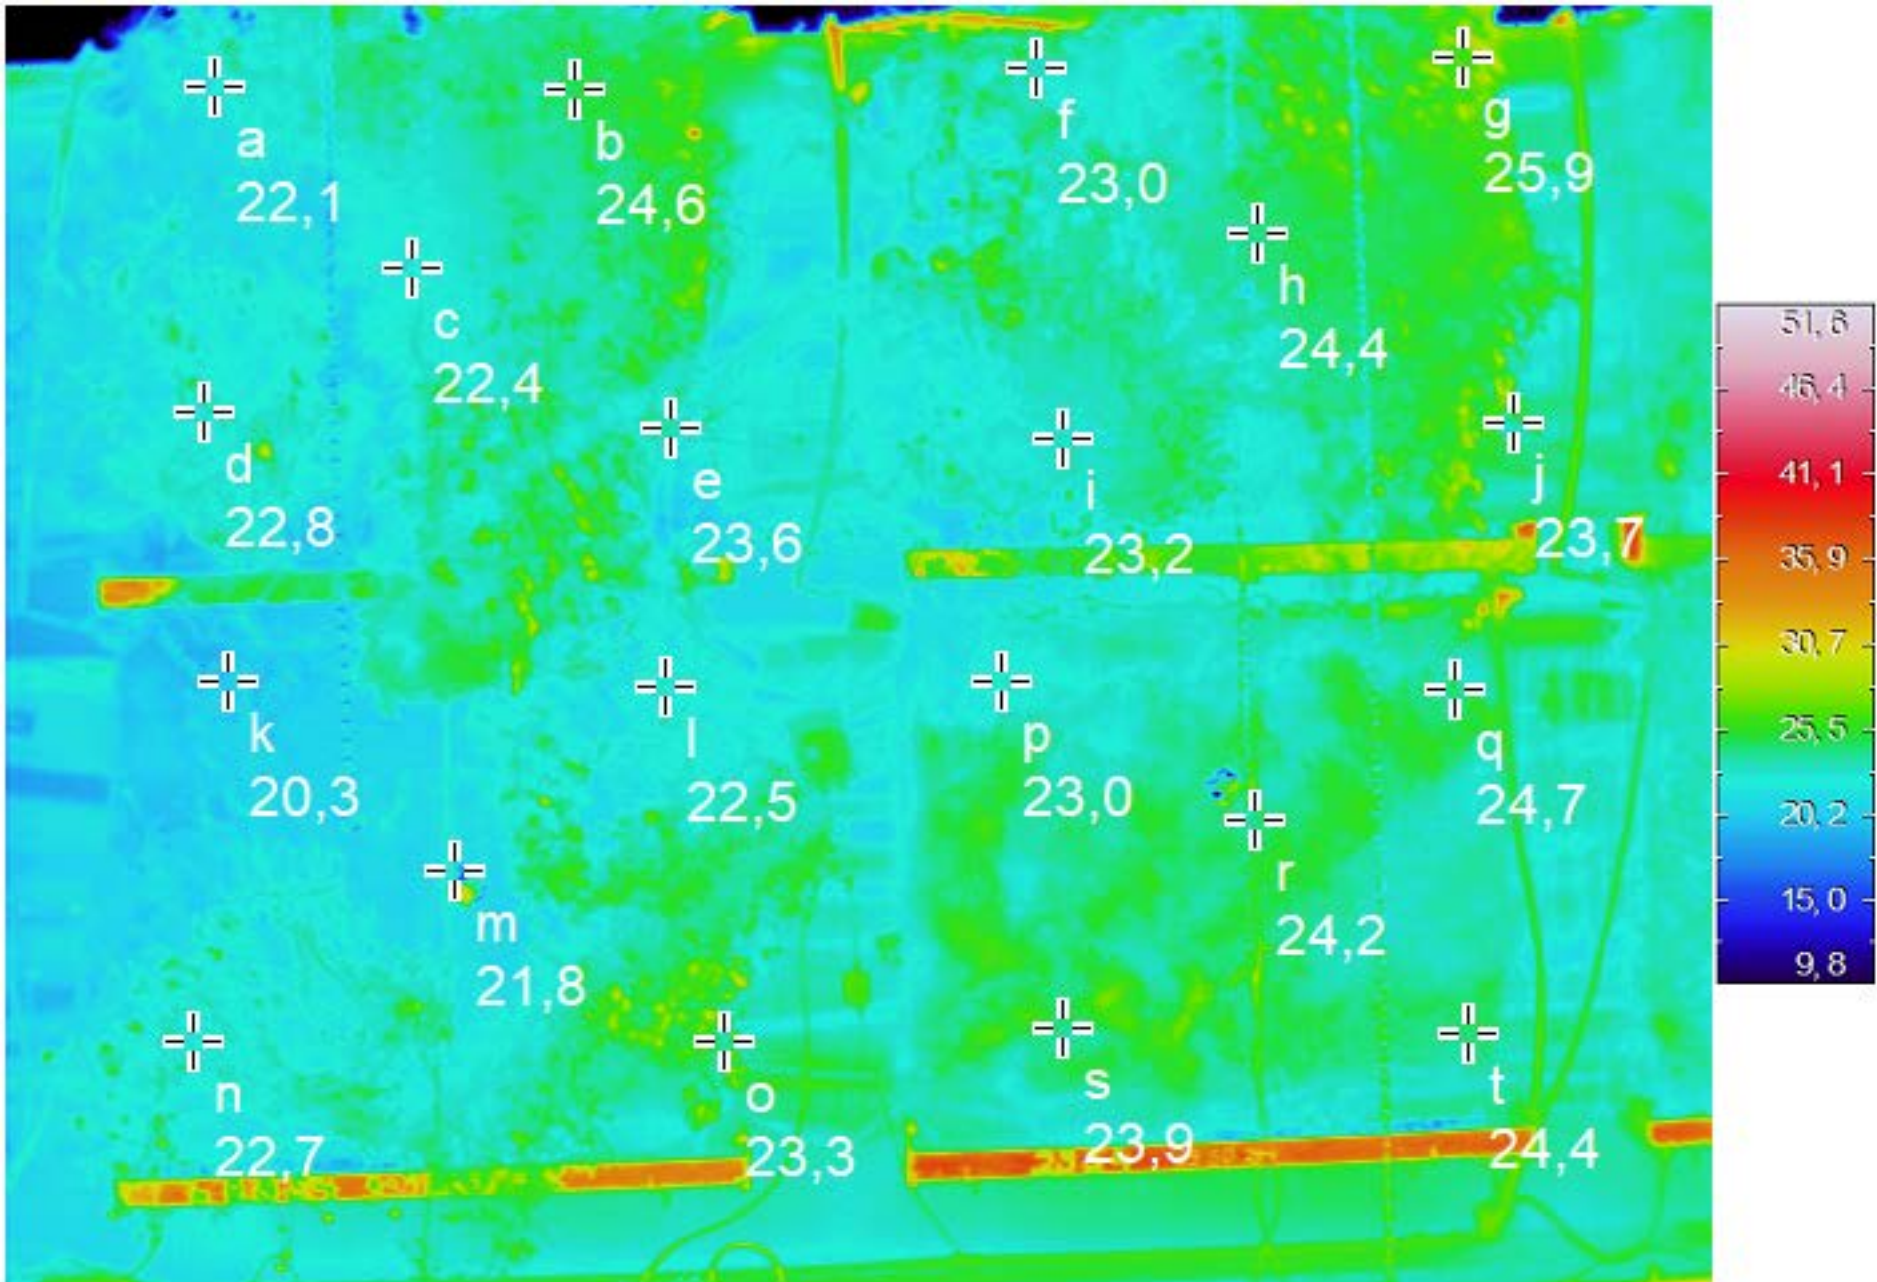

DateinameT01978IR.JPG  
Messtag:2019/06/18  
Messzeit:09:15:35  
Kommentar:  
Kameramodell:R500P  
Range:1[-20,0C-60,0C]  
BildmodusMEDx1,00  
Externes Objektiv:Standard  
Emissionsgrad:1.00  
Ambient Temp: 24,9IC  
IR Bildx1,00



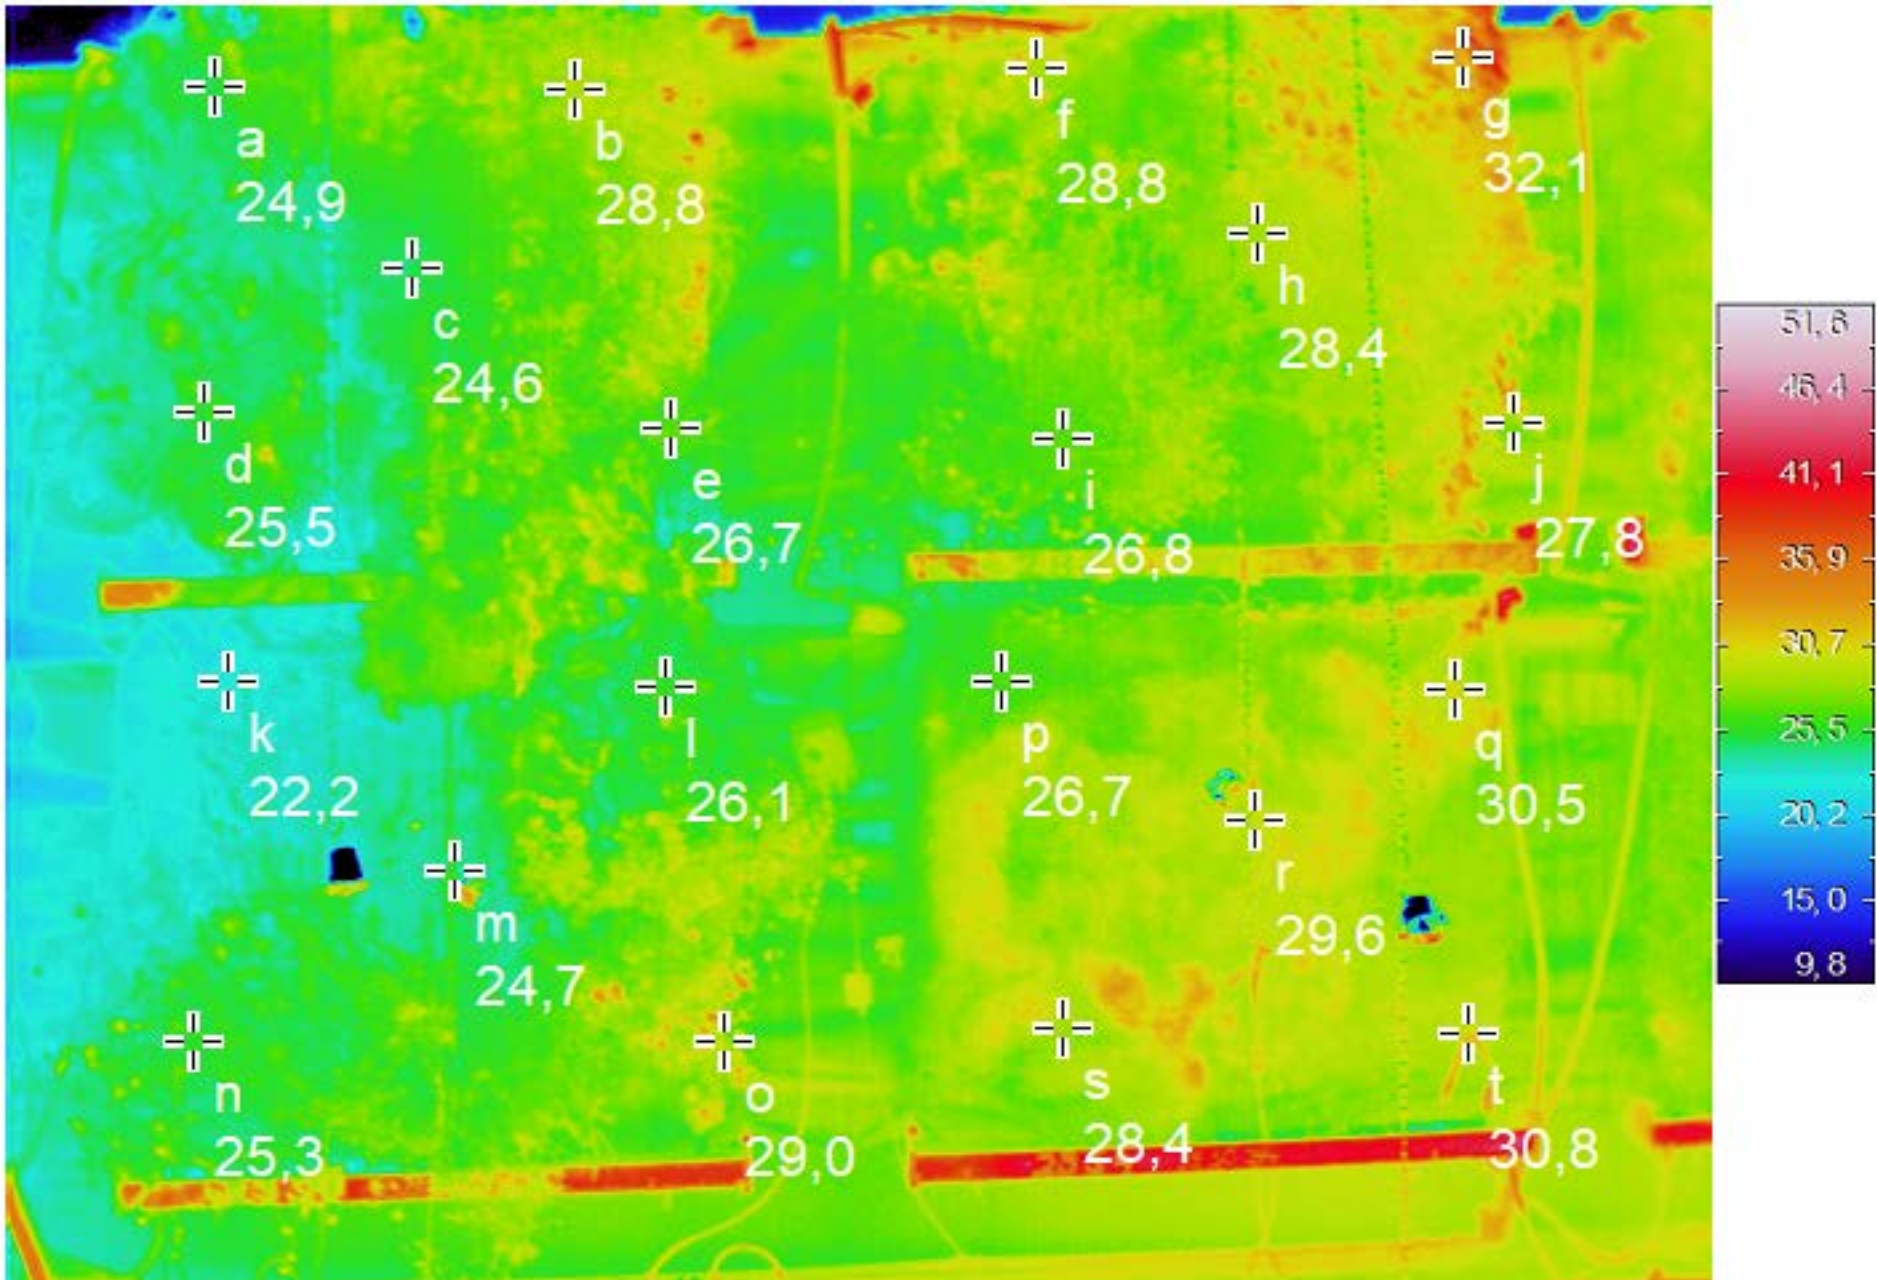

DateinameT01980IR.JPG  
Messtag:2019/06/18  
Messzeit:09:23:34  
Kommentar:  
Kameramodell:R500P  
Range:1[-20,0C-60,0C]  
BildmodusMEDx1,00  
Externes Objektiv:Standard  
Emissionsgrad:1.00  
Ambient Temp: 24,9IC  
IR Bildx1,00



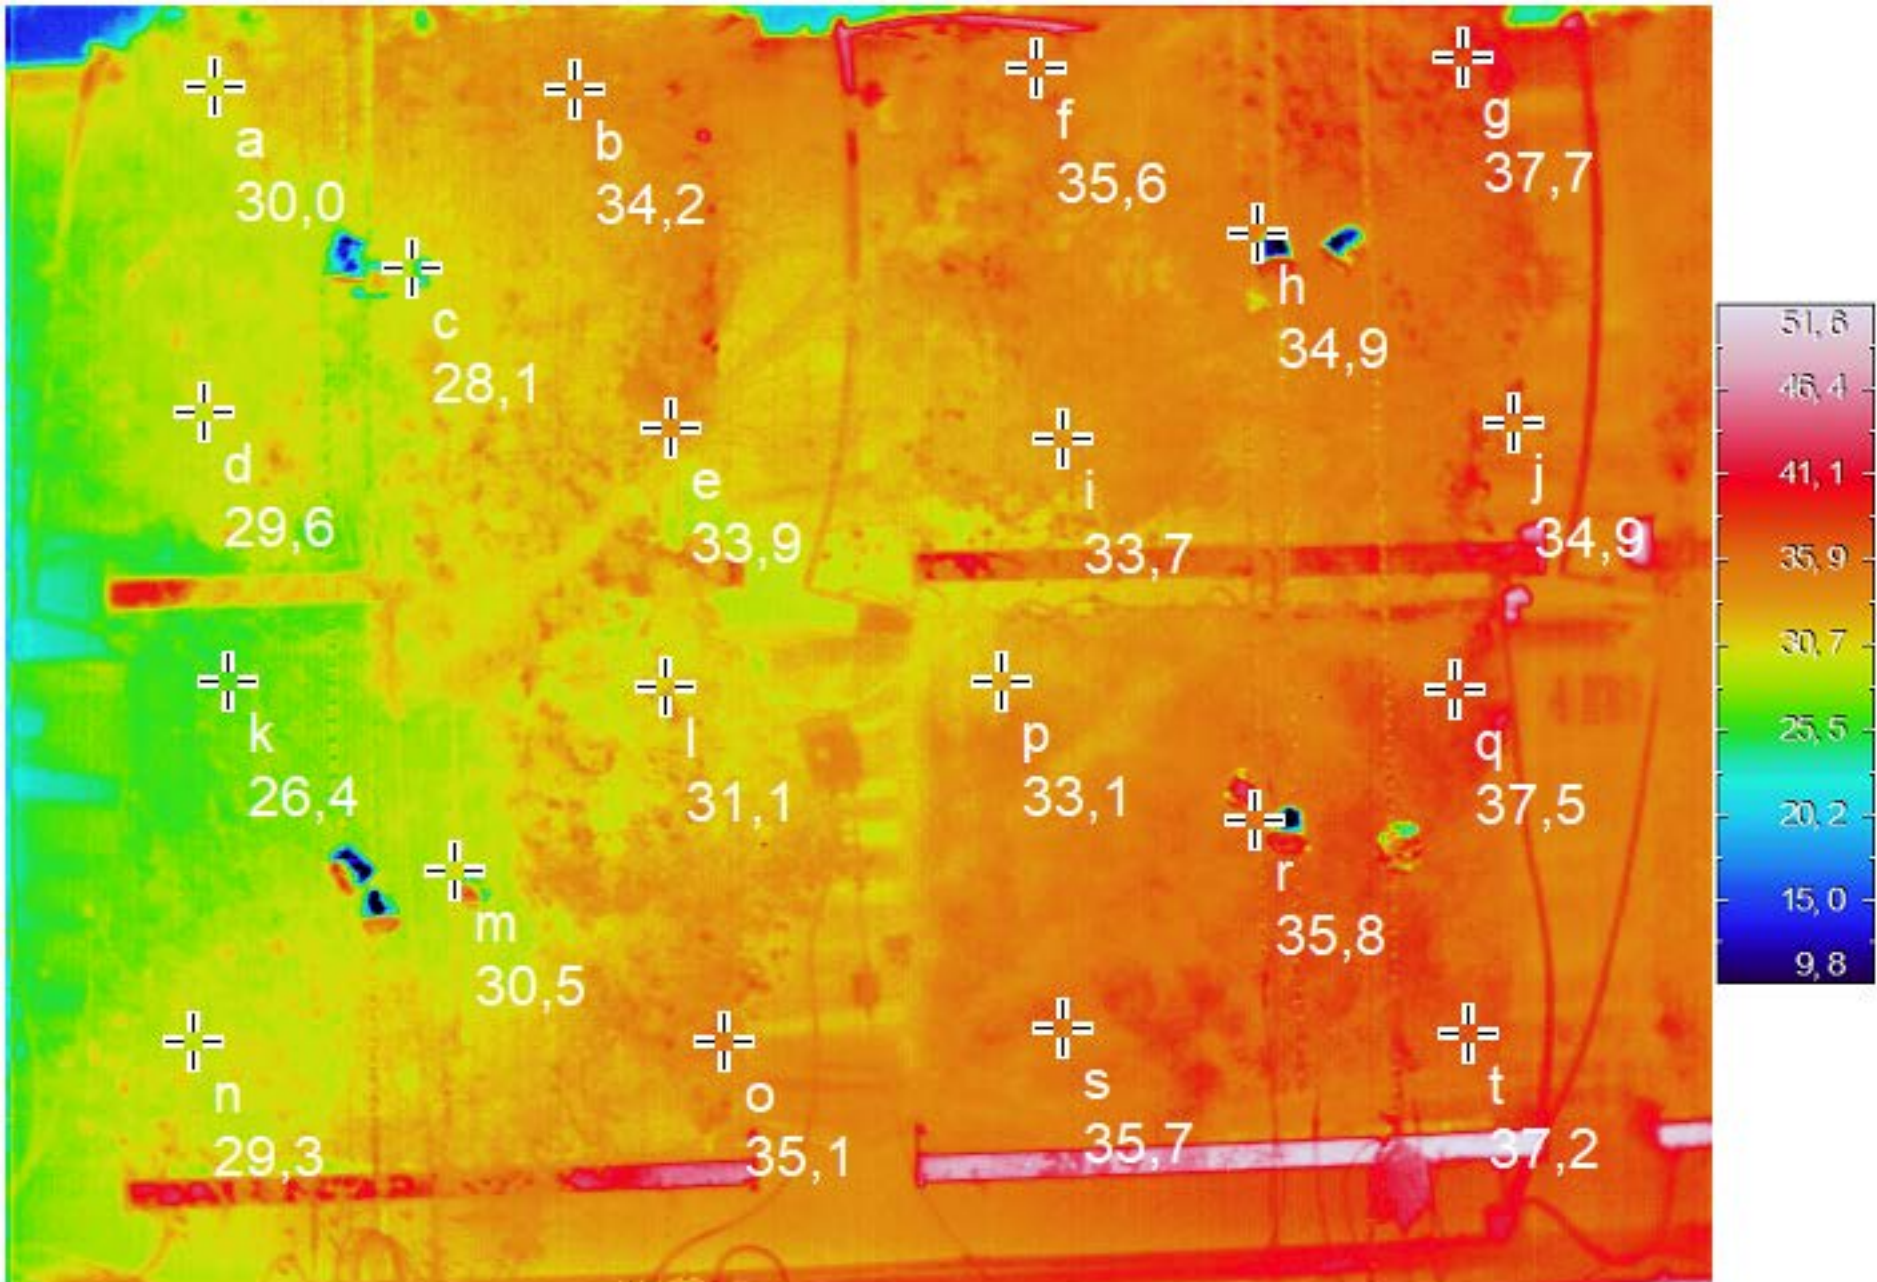

DateinameT01985IR.JPG  
Messtag:2019/06/18  
Messzeit:09:43:34  
Kommentar:  
Kameramodell:R500P  
Range:1[-20,0C-60,0C]  
BildmodusMEDx1,00  
Externes Objektiv:Standard  
Emissionsgrad:1.00  
Ambient Temp: 24,9IC  
IR Bildx1,00



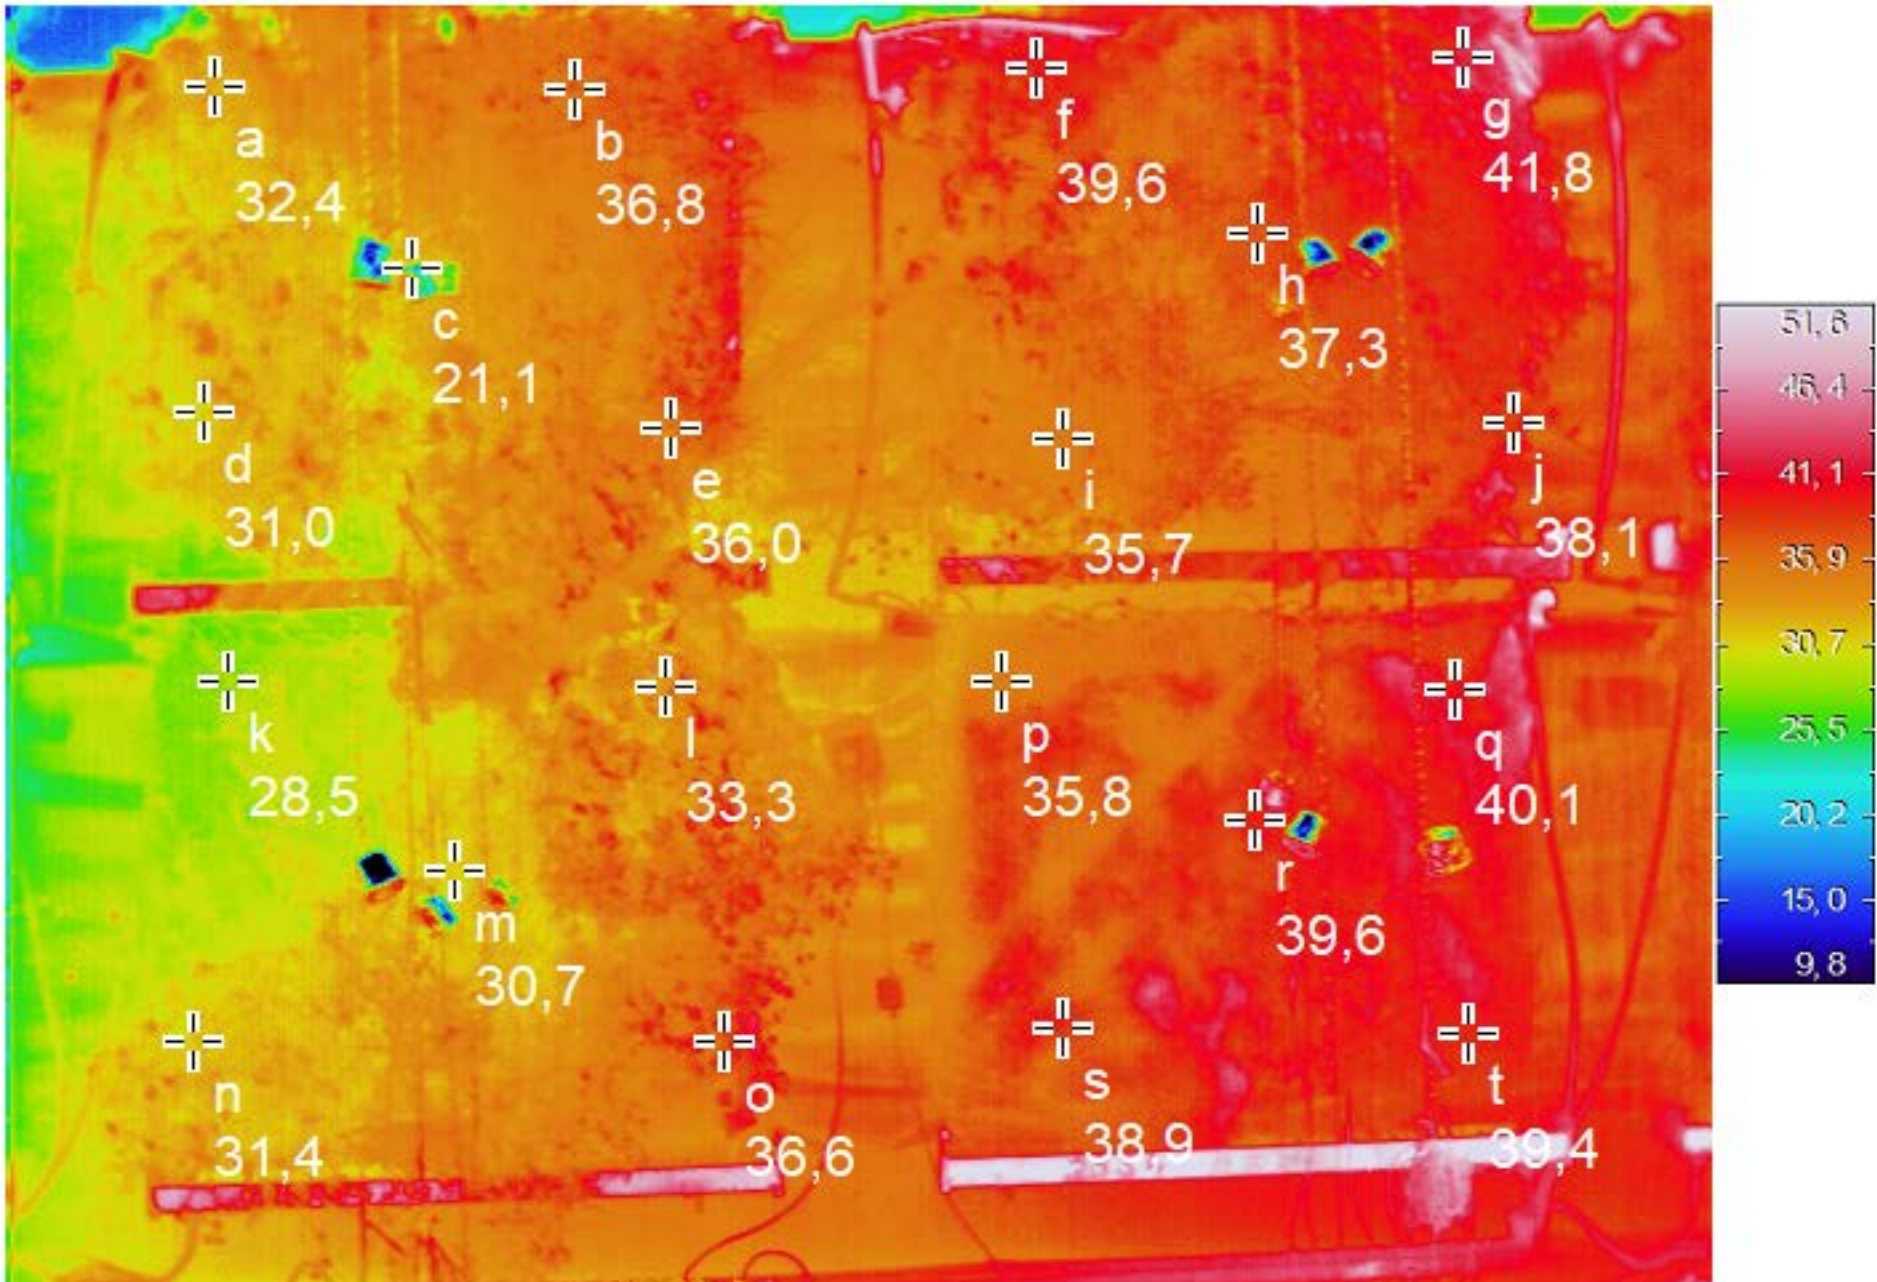

DateinameT01988IR.JPG  
Messtag:2019/06/18  
Messzeit:09:55:34  
Kommentar:  
Kameramodell:R500P  
Range:1[-20,0C-60,0C]  
BildmodusMEDx1,00  
Externes Objektiv:Standard  
Emissionsgrad:1.00  
Ambient Temp: 24,9IC  
IR Bildx1,00



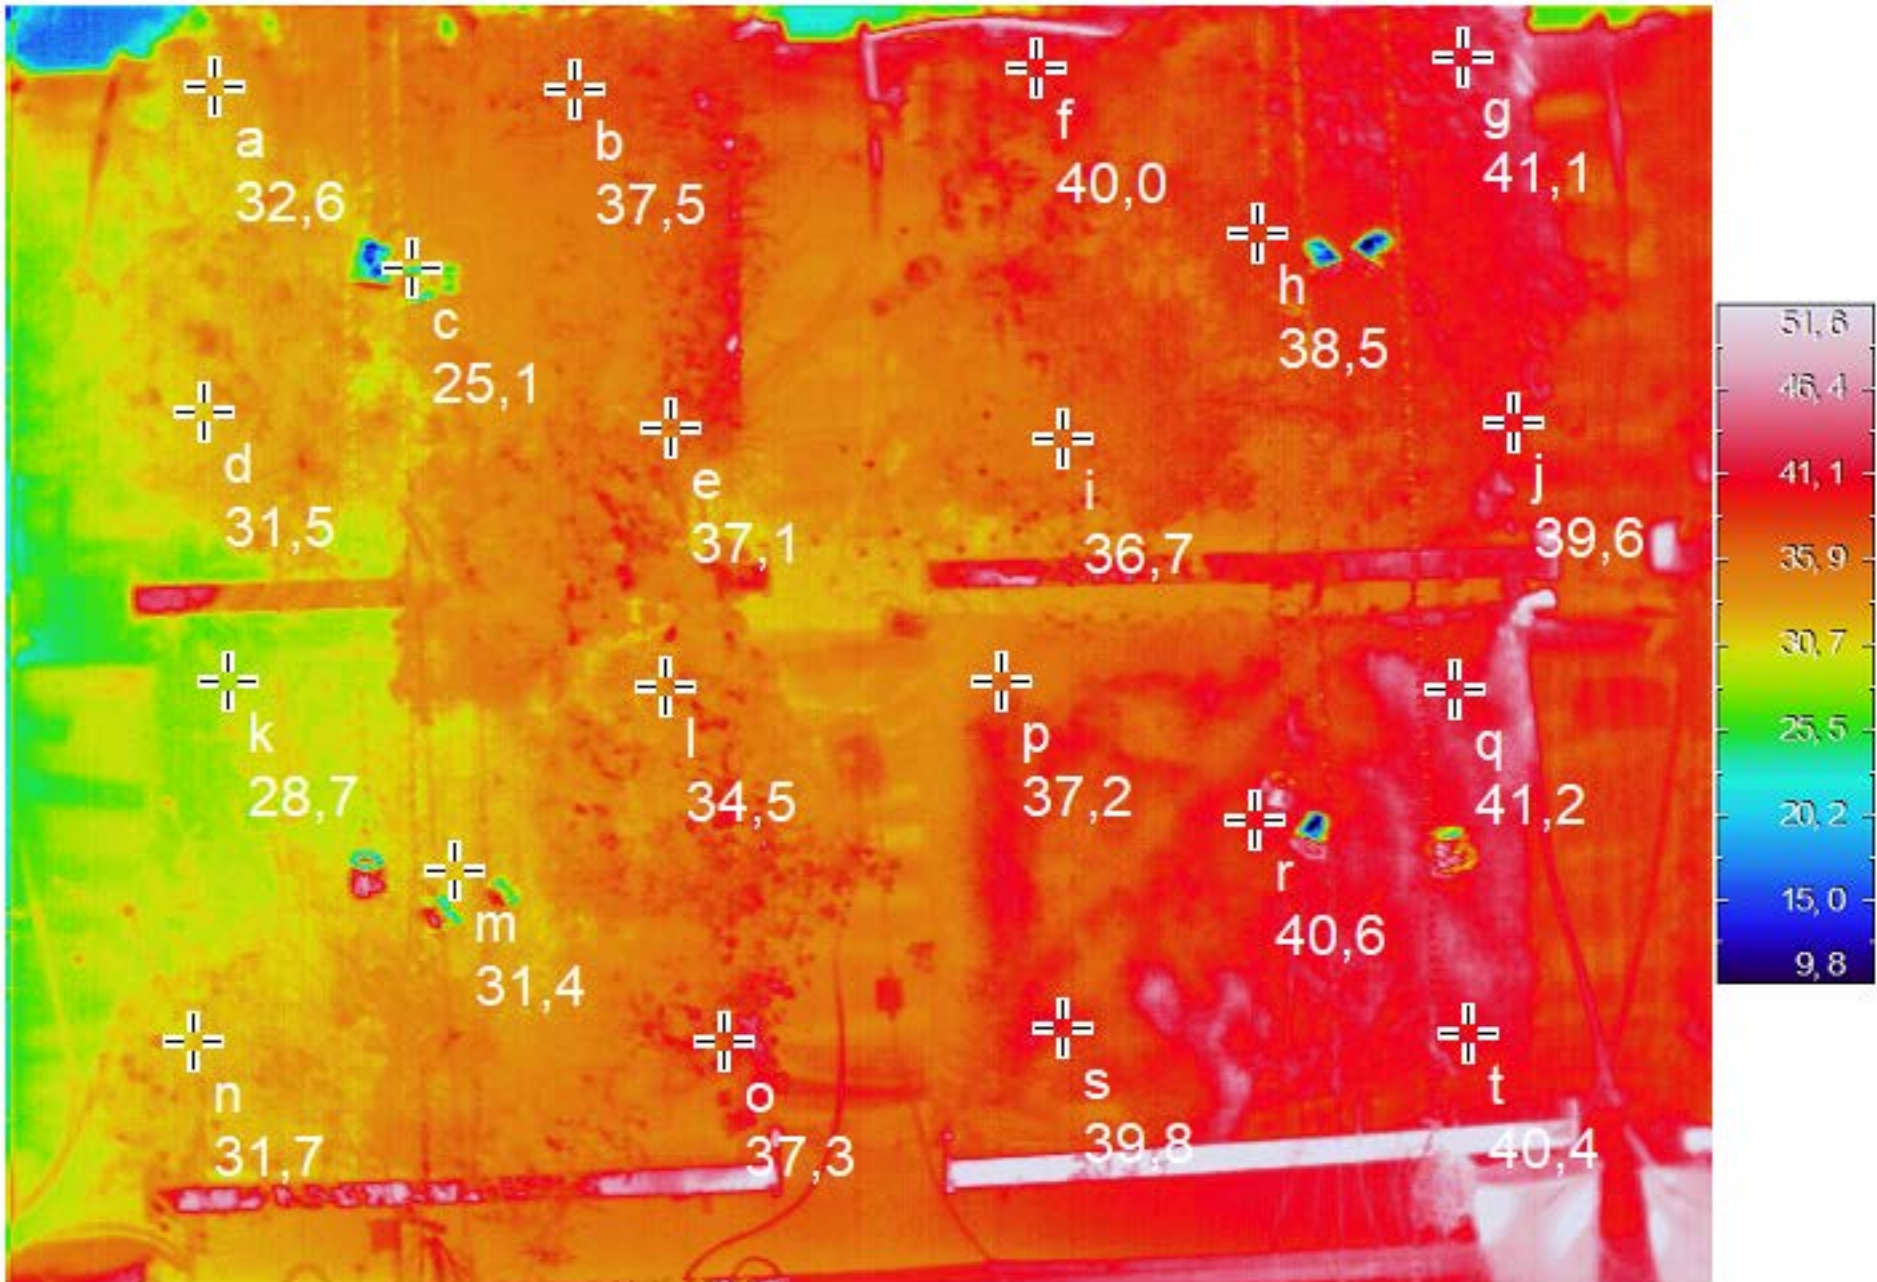

DateinameT01990IR.JPG  
Messtag:2019/06/18  
Messzeit:10:03:34  
Kommentar:  
Kameramodell:R500P  
Range:1[-20,0C-60,0C]  
BildmodusMEDx1,00  
Externes Objektiv:Standard  
Emissionsgrad:1.00  
Ambient Temp: 24,9IC  
IR Bildx1,00



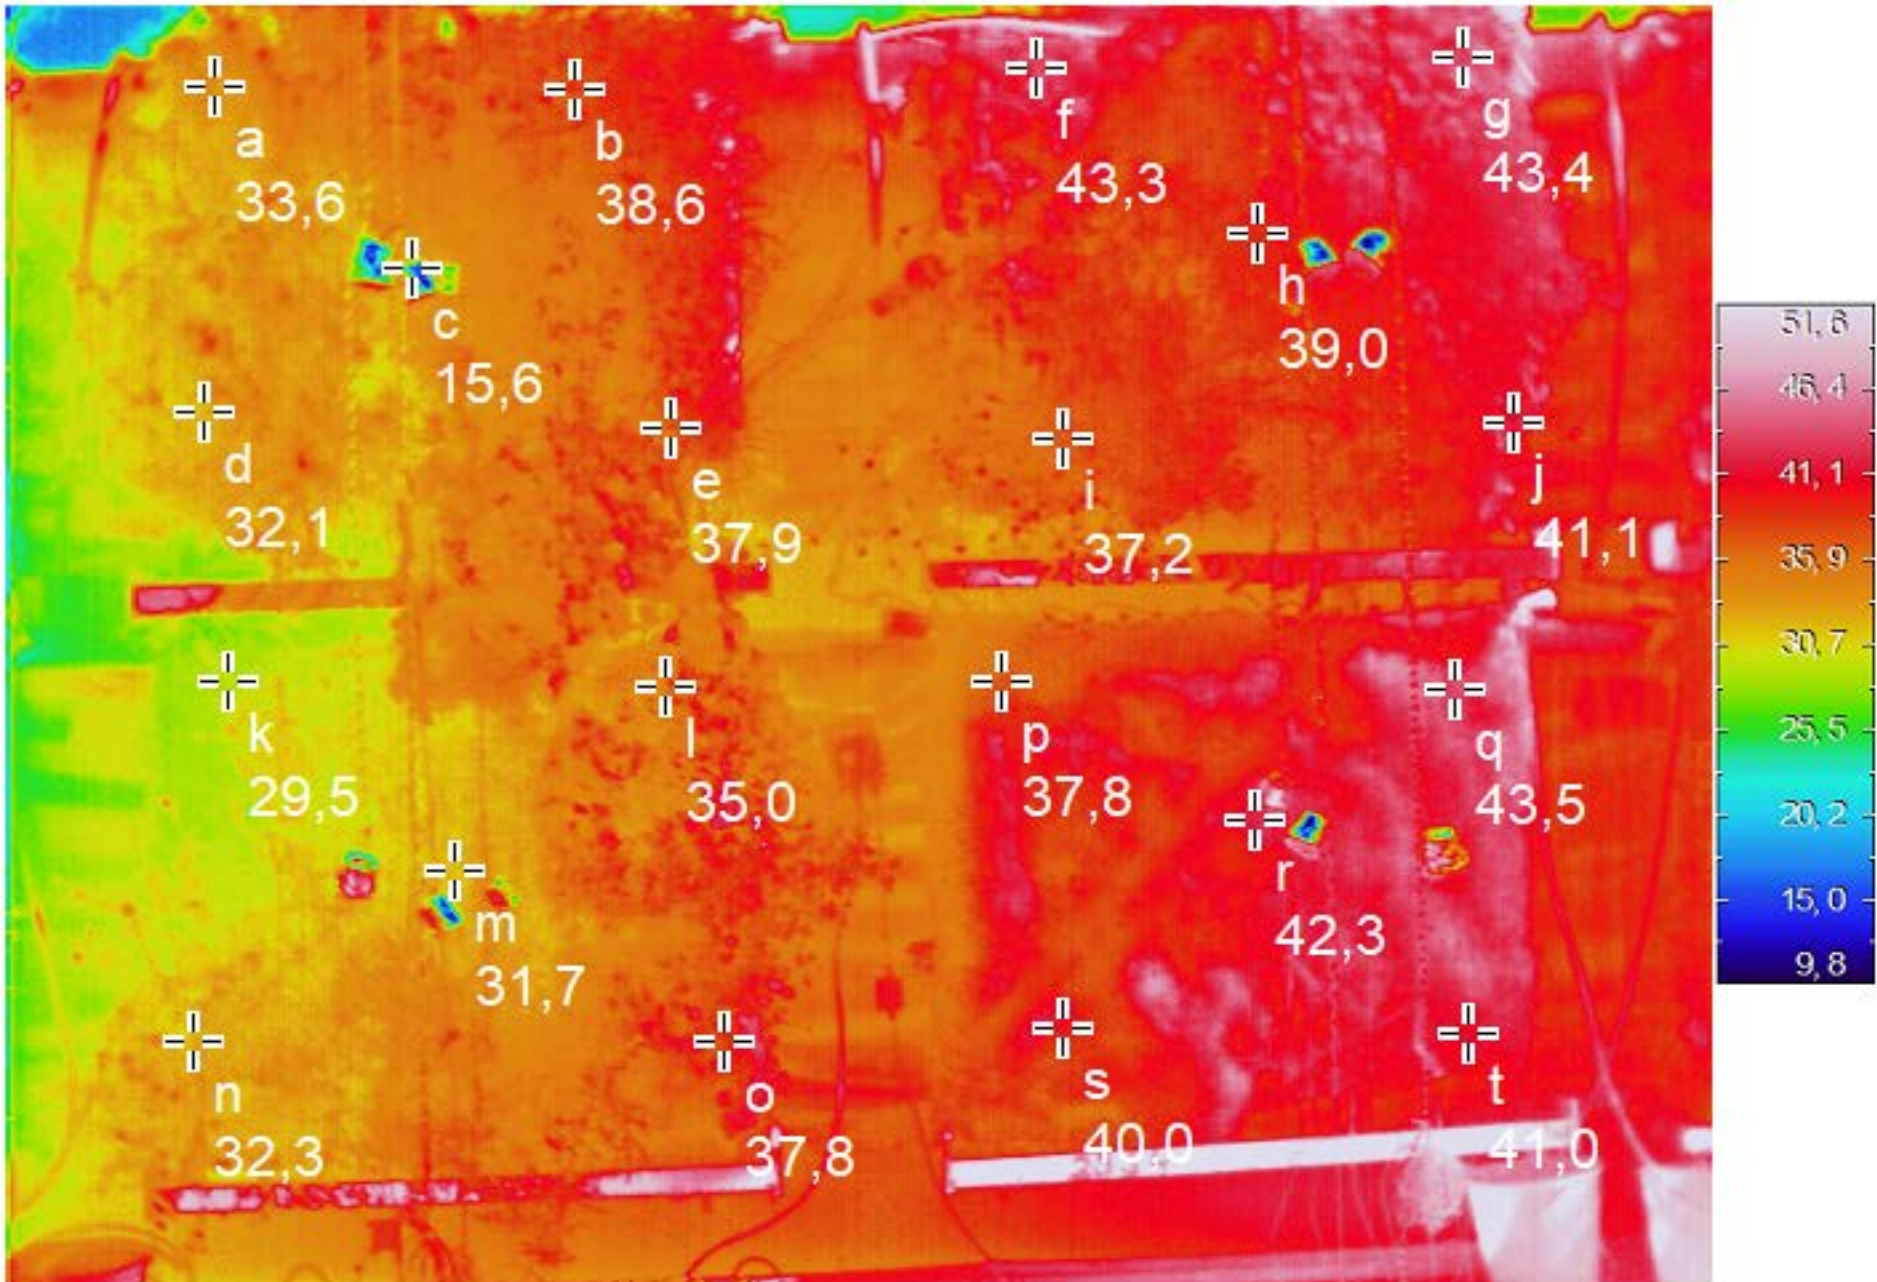

DateinameT01991IR.JPG  
Messtag:2019/06/18  
Messzeit:10:07:34  
Kommentar:  
Kameramodell:R500P  
Range:1[-20,0C-60,0C]  
BildmodusMEDx1,00  
Externes Objektiv:Standard  
Emissionsgrad:1.00  
Ambient Temp: 24,9IC  
IR Bildx1,00



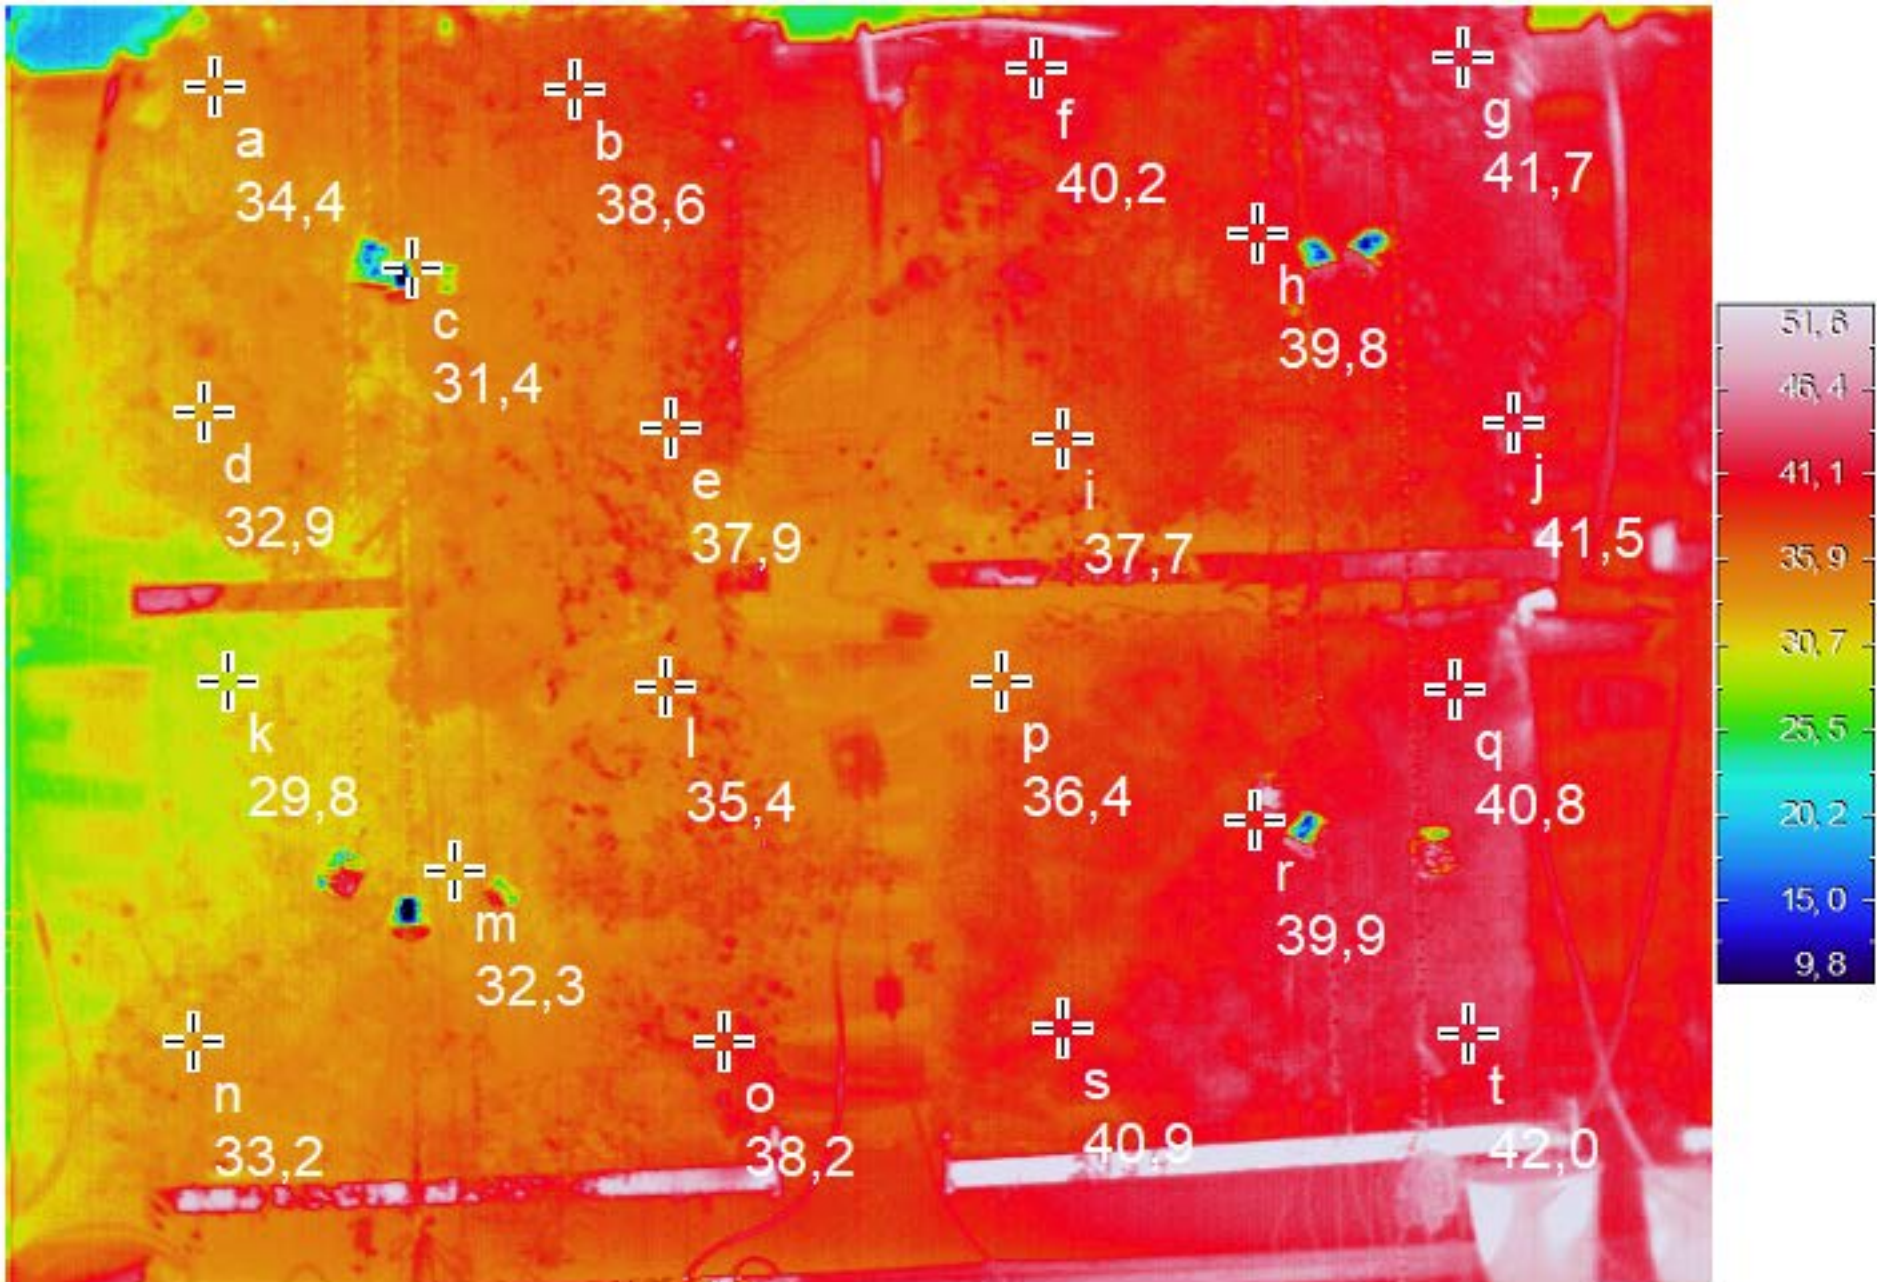

DateinameT01992IR.JPG  
Messtag:2019/06/18  
Messzeit:10:11:35  
Kommentar:  
Kameramodell:R500P  
Range:1[-20,0C-60,0C]  
BildmodusMEDx1,00  
Externes Objektiv:Standard  
Emissionsgrad:1.00  
Ambient Temp: 24,9IC  
IR Bildx1,00



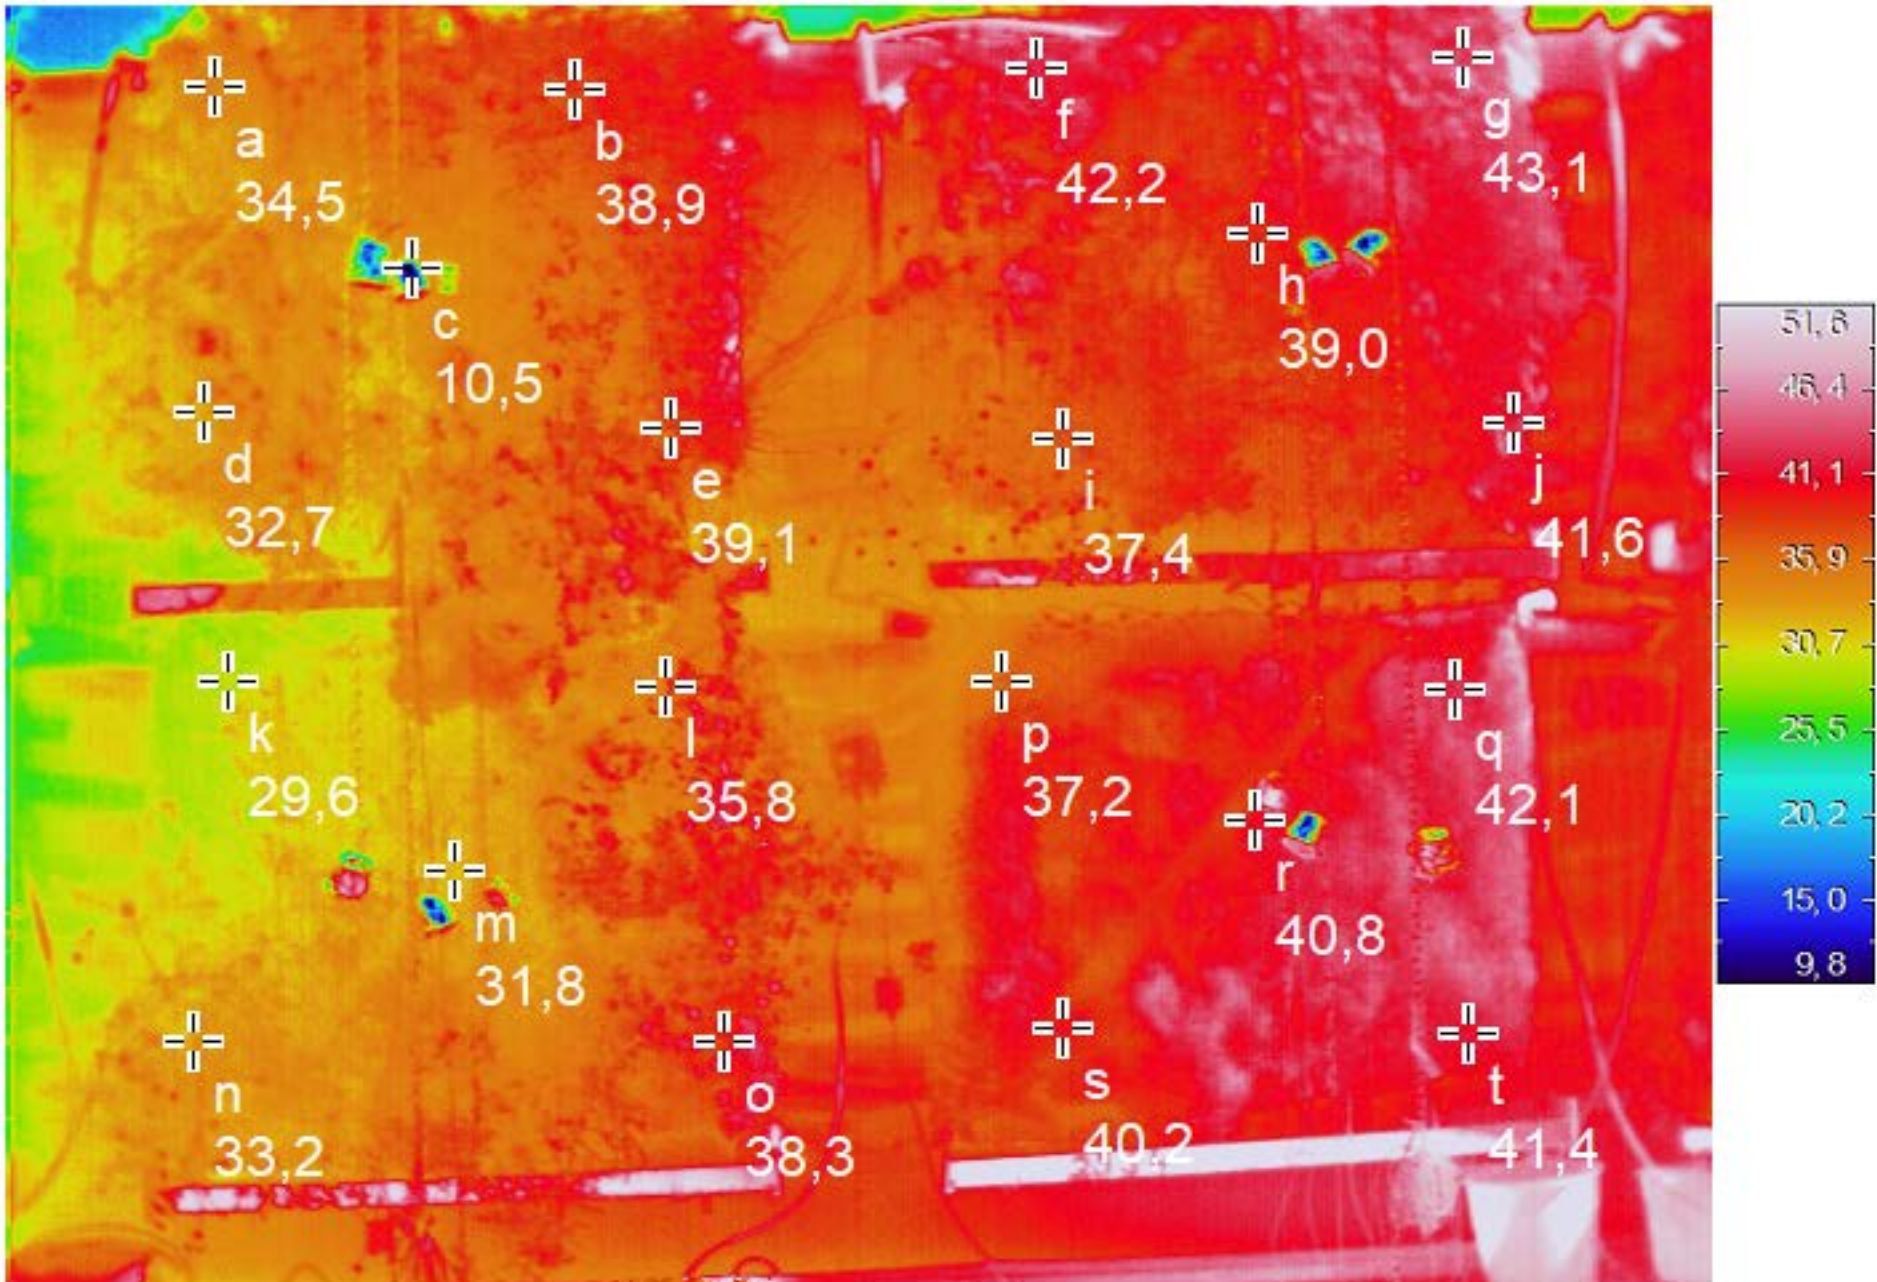

DateinameT01993IR.JPG  
Messtag:2019/06/18  
Messzeit:10:15:35  
Kommentar:  
Kameramodell:R500P  
Range:1[-20,0C-60,0C]  
BildmodusMEDx1,00  
Externes Objektiv:Standard  
Emissionsgrad:1.00  
Ambient Temp: 24,9IC  
IR Bildx1,00



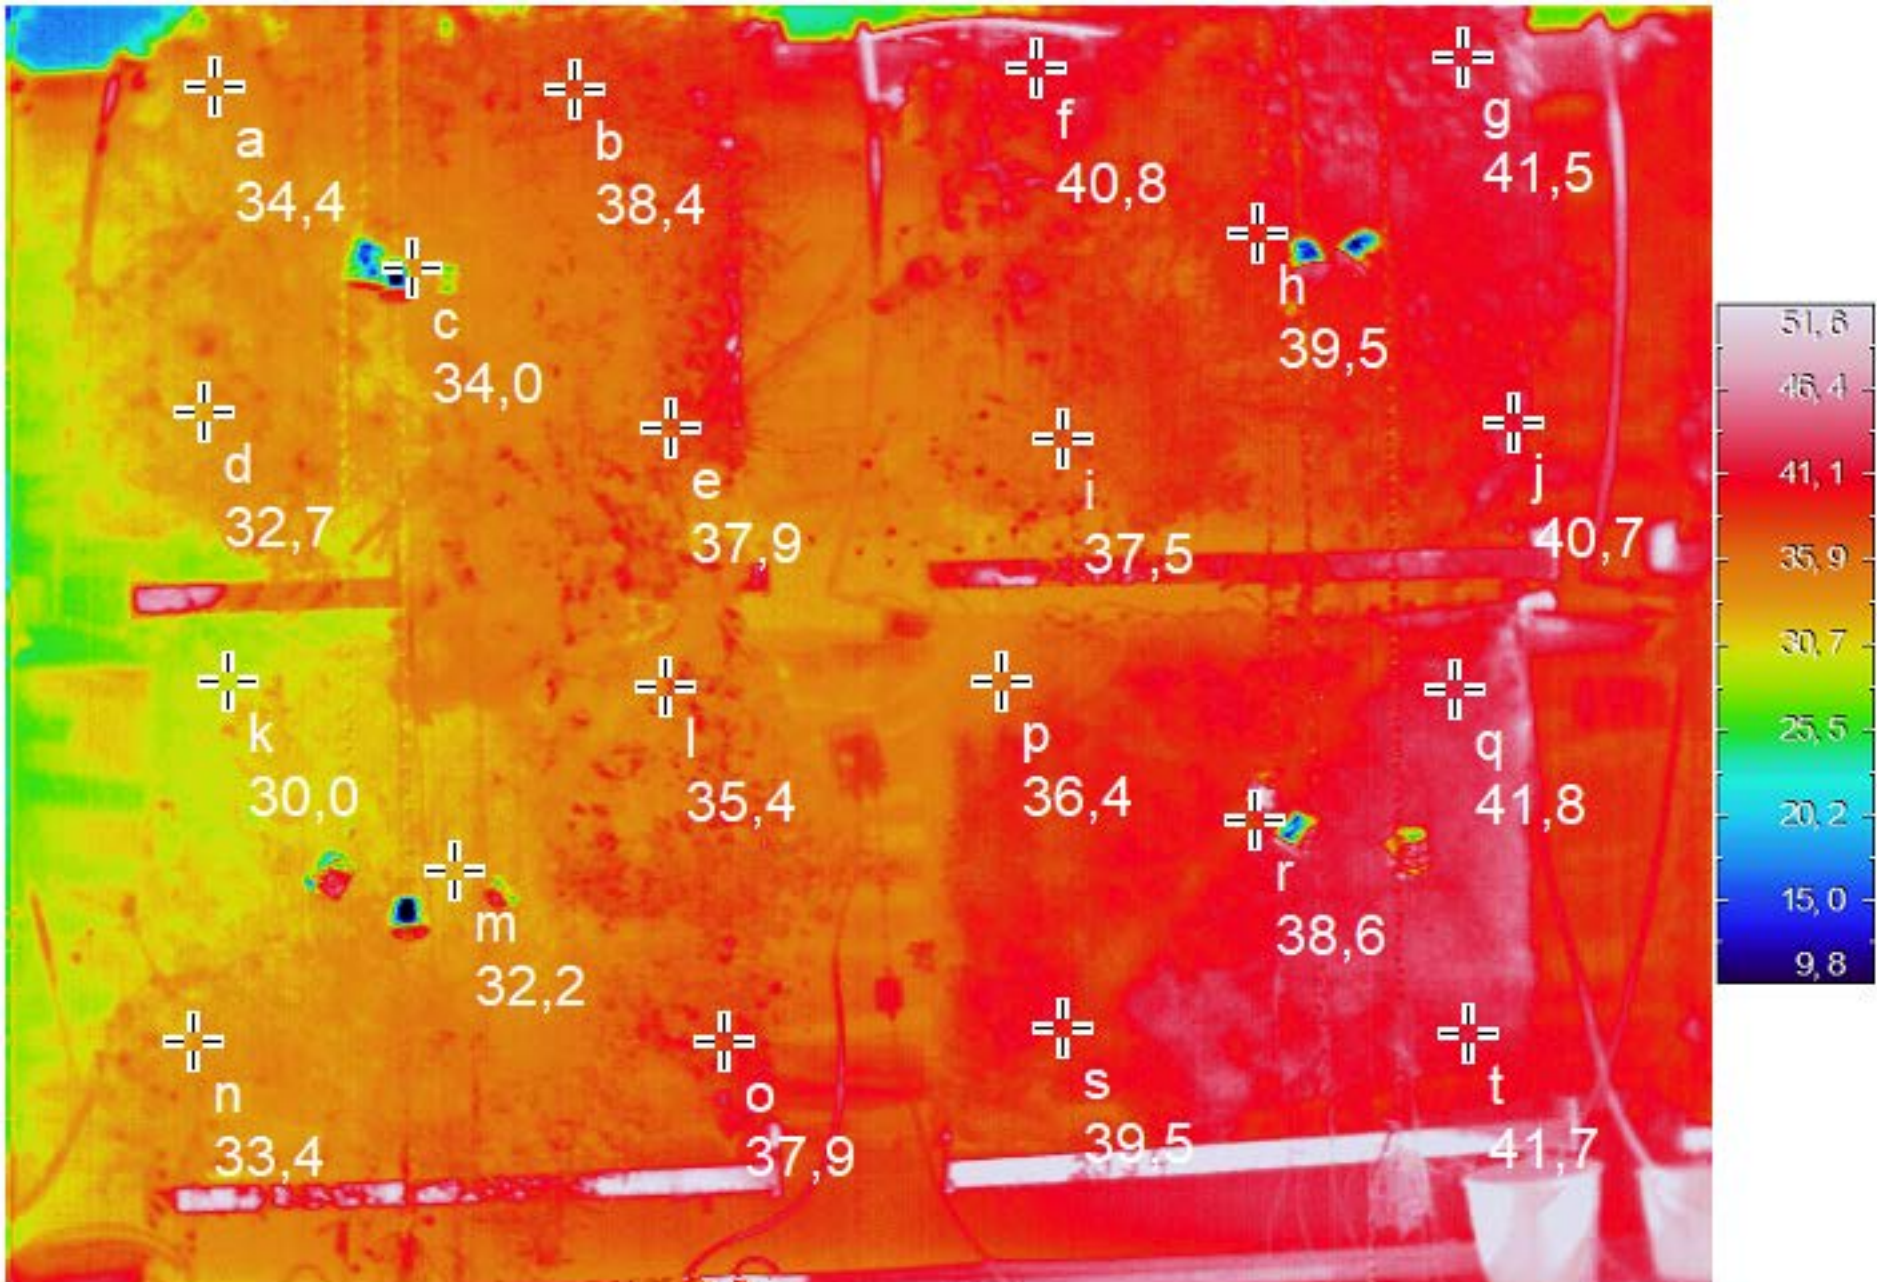

DateinameT01994IR.JPG  
Messtag:2019/06/18  
Messzeit:10:19:34  
Kommentar:  
Kameramodell:R500P  
Range:1[-20,0C-60,0C]  
BildmodusMEDx1,00  
Externes Objektiv:Standard  
Emissionsgrad:1.00  
Ambient Temp: 24,9IC  
IR Bildx1,00



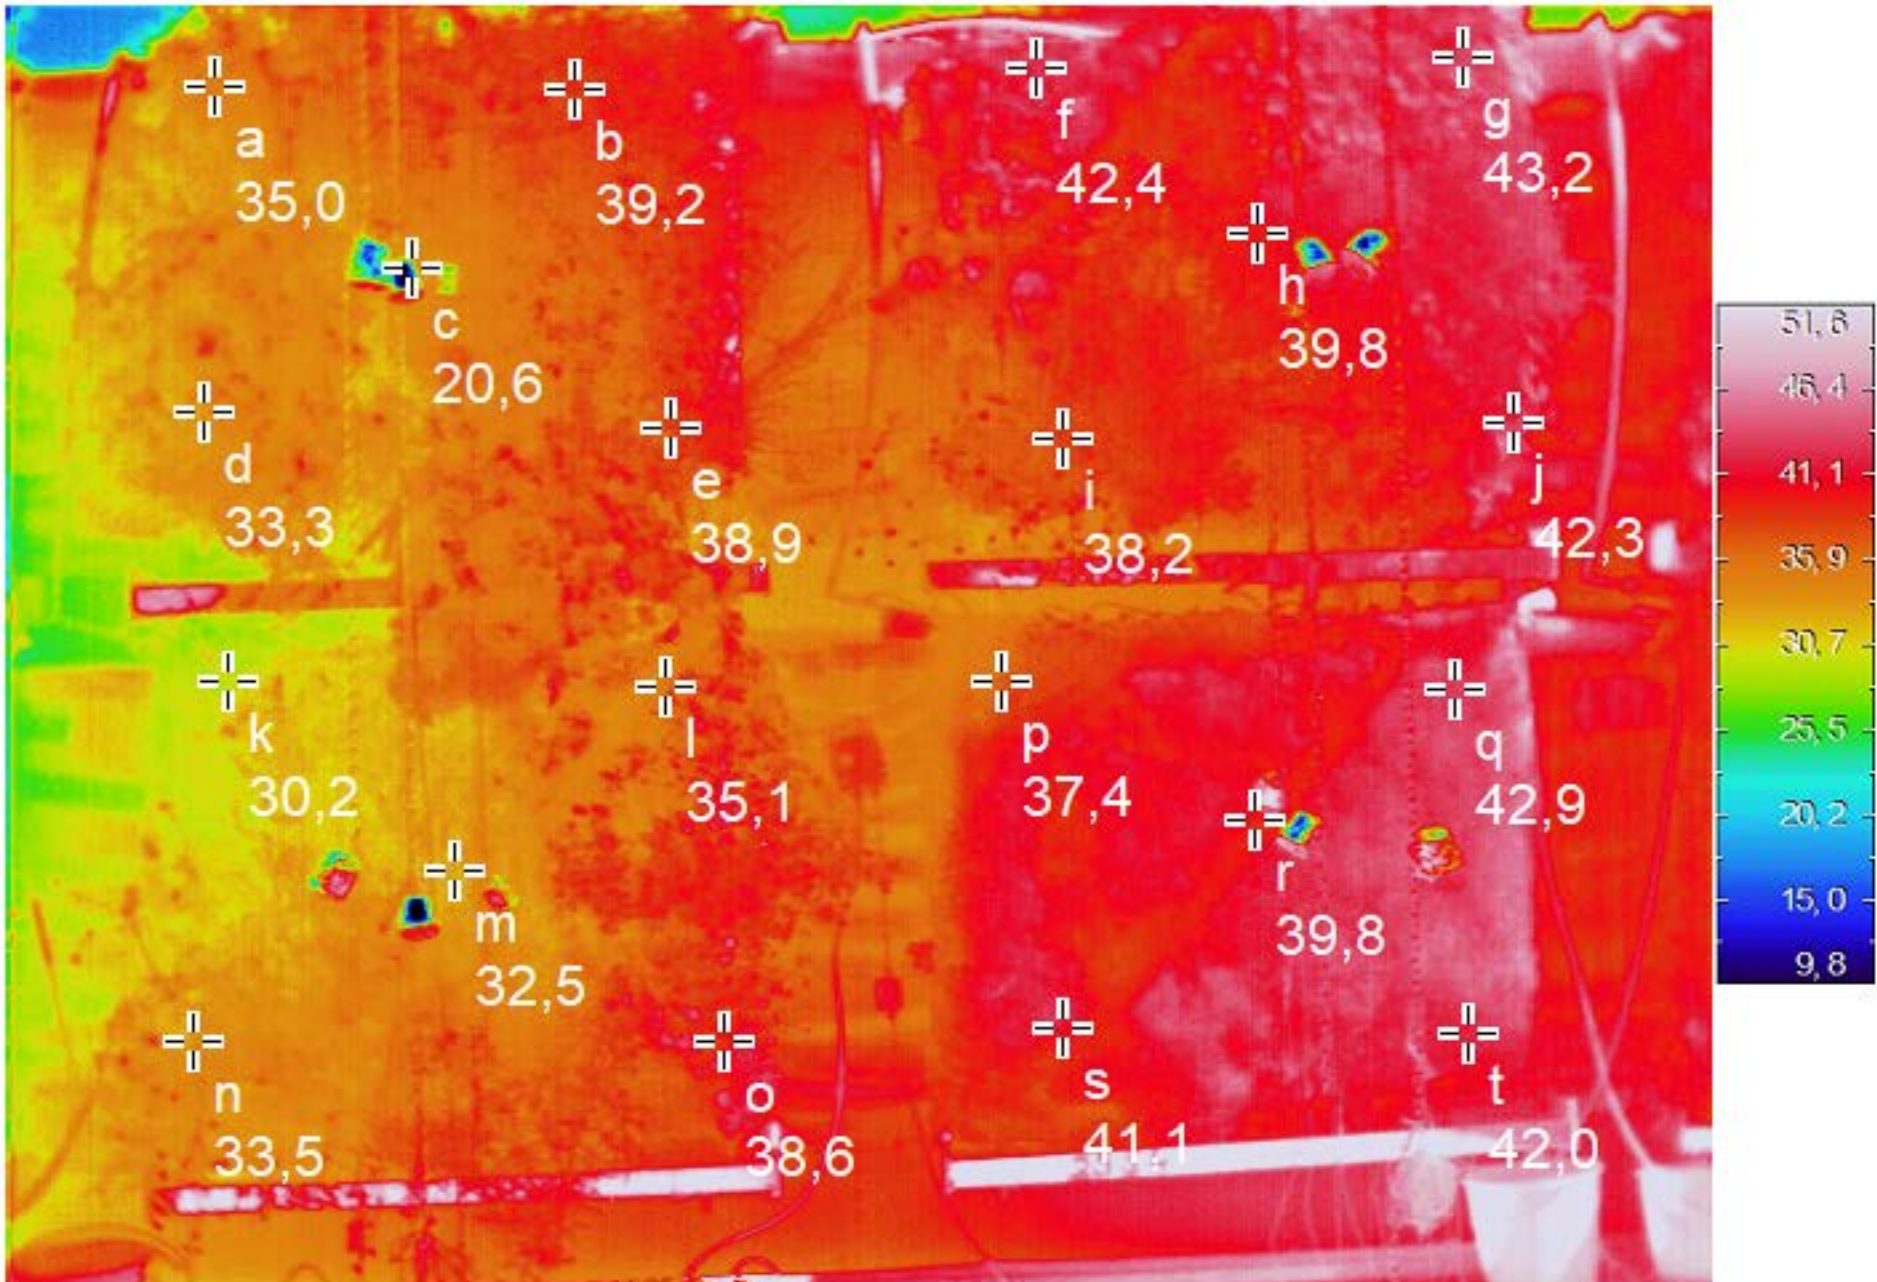

DateinameT01995IR.JPG  
Messtag:2019/06/18  
Messzeit:10:23:34  
Kommentar:  
Kameramodell:R500P  
Range:1[-20,0C-60,0C]  
BildmodusMEDx1,00  
Externes Objektiv:Standard  
Emissionsgrad:1.00  
Ambient Temp: 24,9IC  
IR Bildx1,00



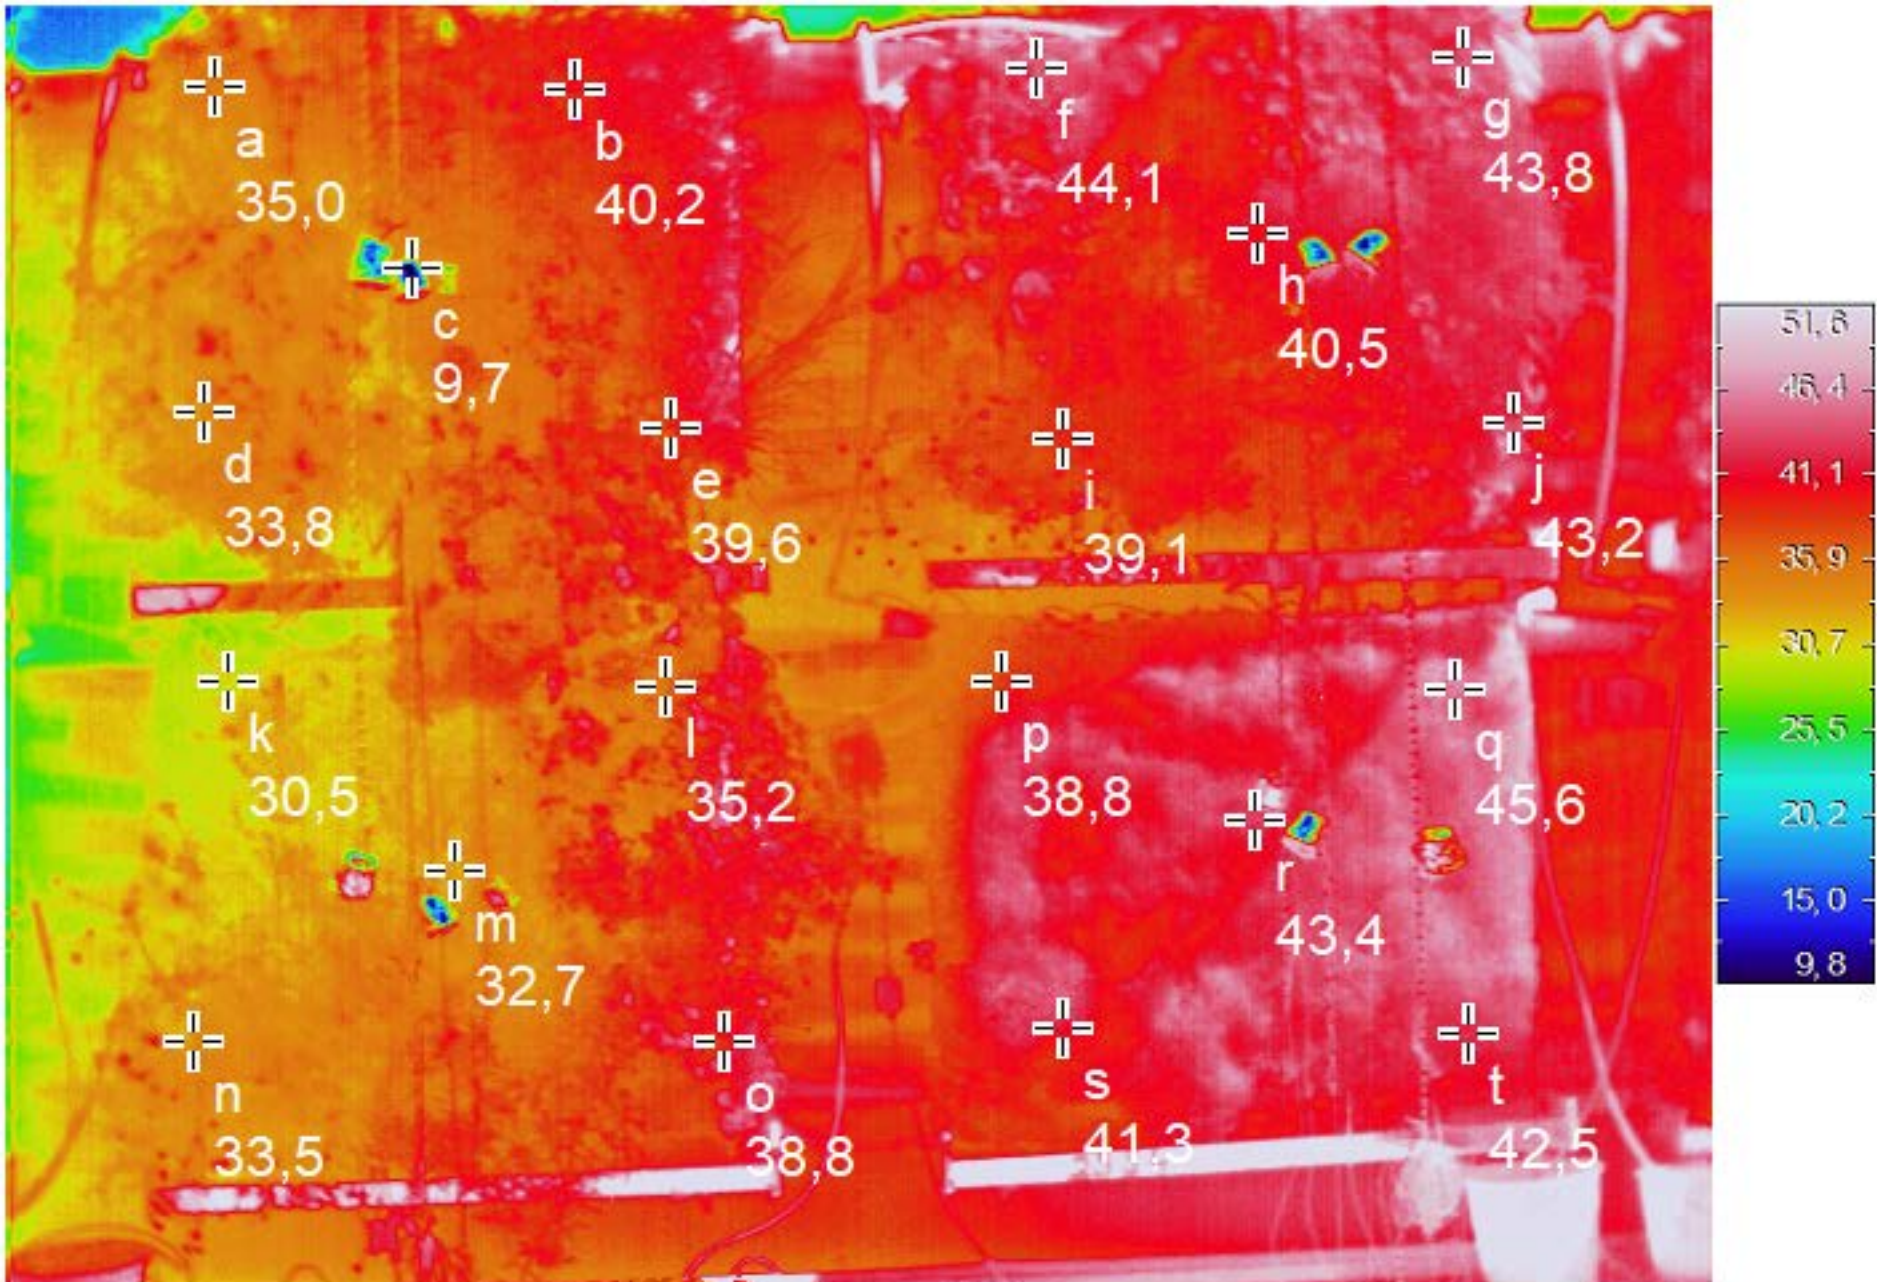

DateinameT01996IR.JPG  
Messtag:2019/06/18  
Messzeit:10:27:34  
Kommentar:  
Kameramodell:R500P  
Range:1[-20,0C-60,0C]  
BildmodusMEDx1,00  
Externes Objektiv:Standard  
Emissionsgrad:1.00  
Ambient Temp: 24,9IC  
IR Bildx1,00



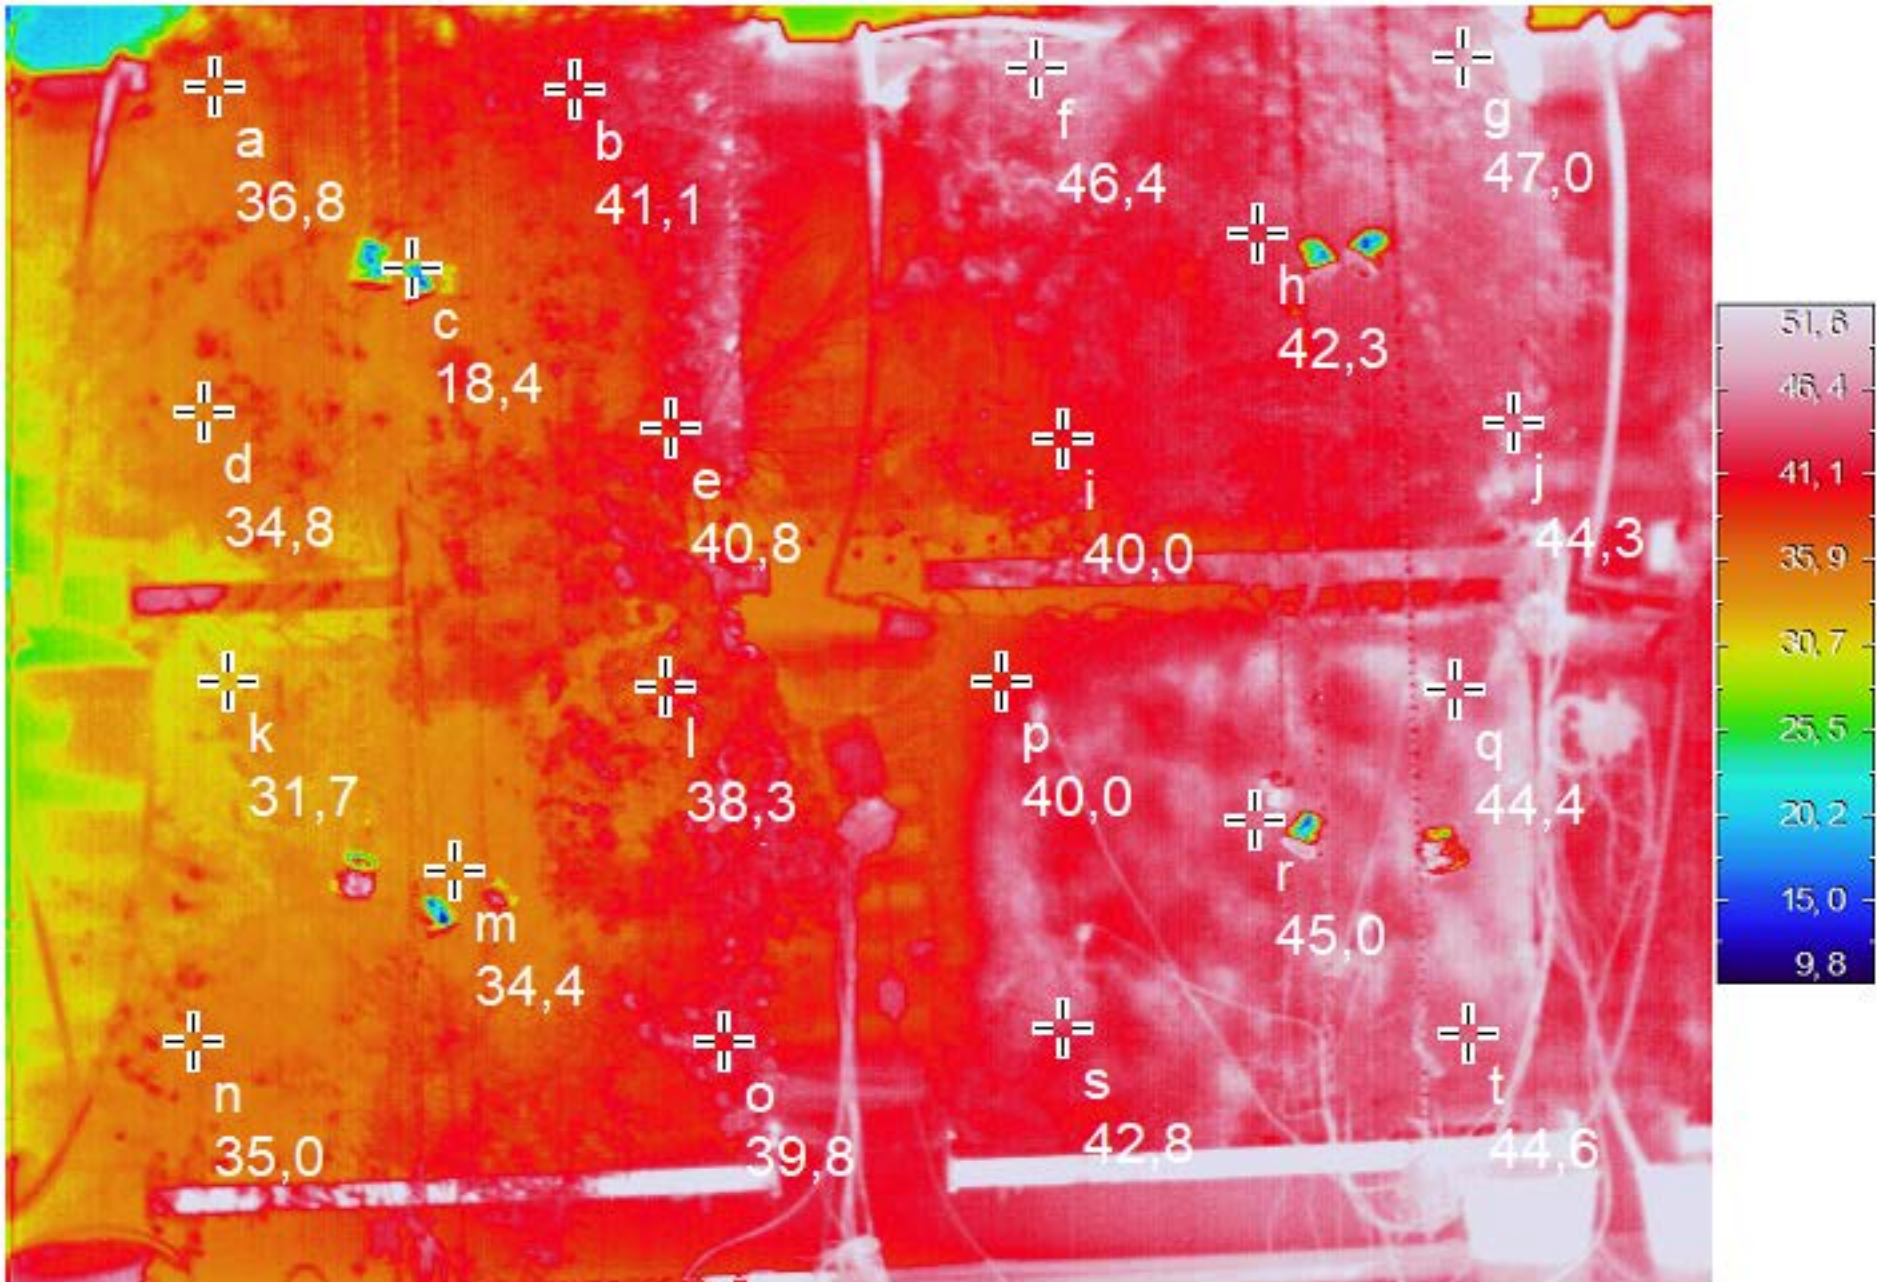

DateinameT02000IR.JPG  
Messtag:2019/06/18  
Messzeit:10:43:34  
Kommentar:  
Kameramodell:R500P  
Range:1[-20,0C-60,0C]  
BildmodusMEDx1,00  
Externes Objektiv:Standard  
Emissionsgrad:1.00  
Ambient Temp: 24,9IC  
IR Bildx1,00



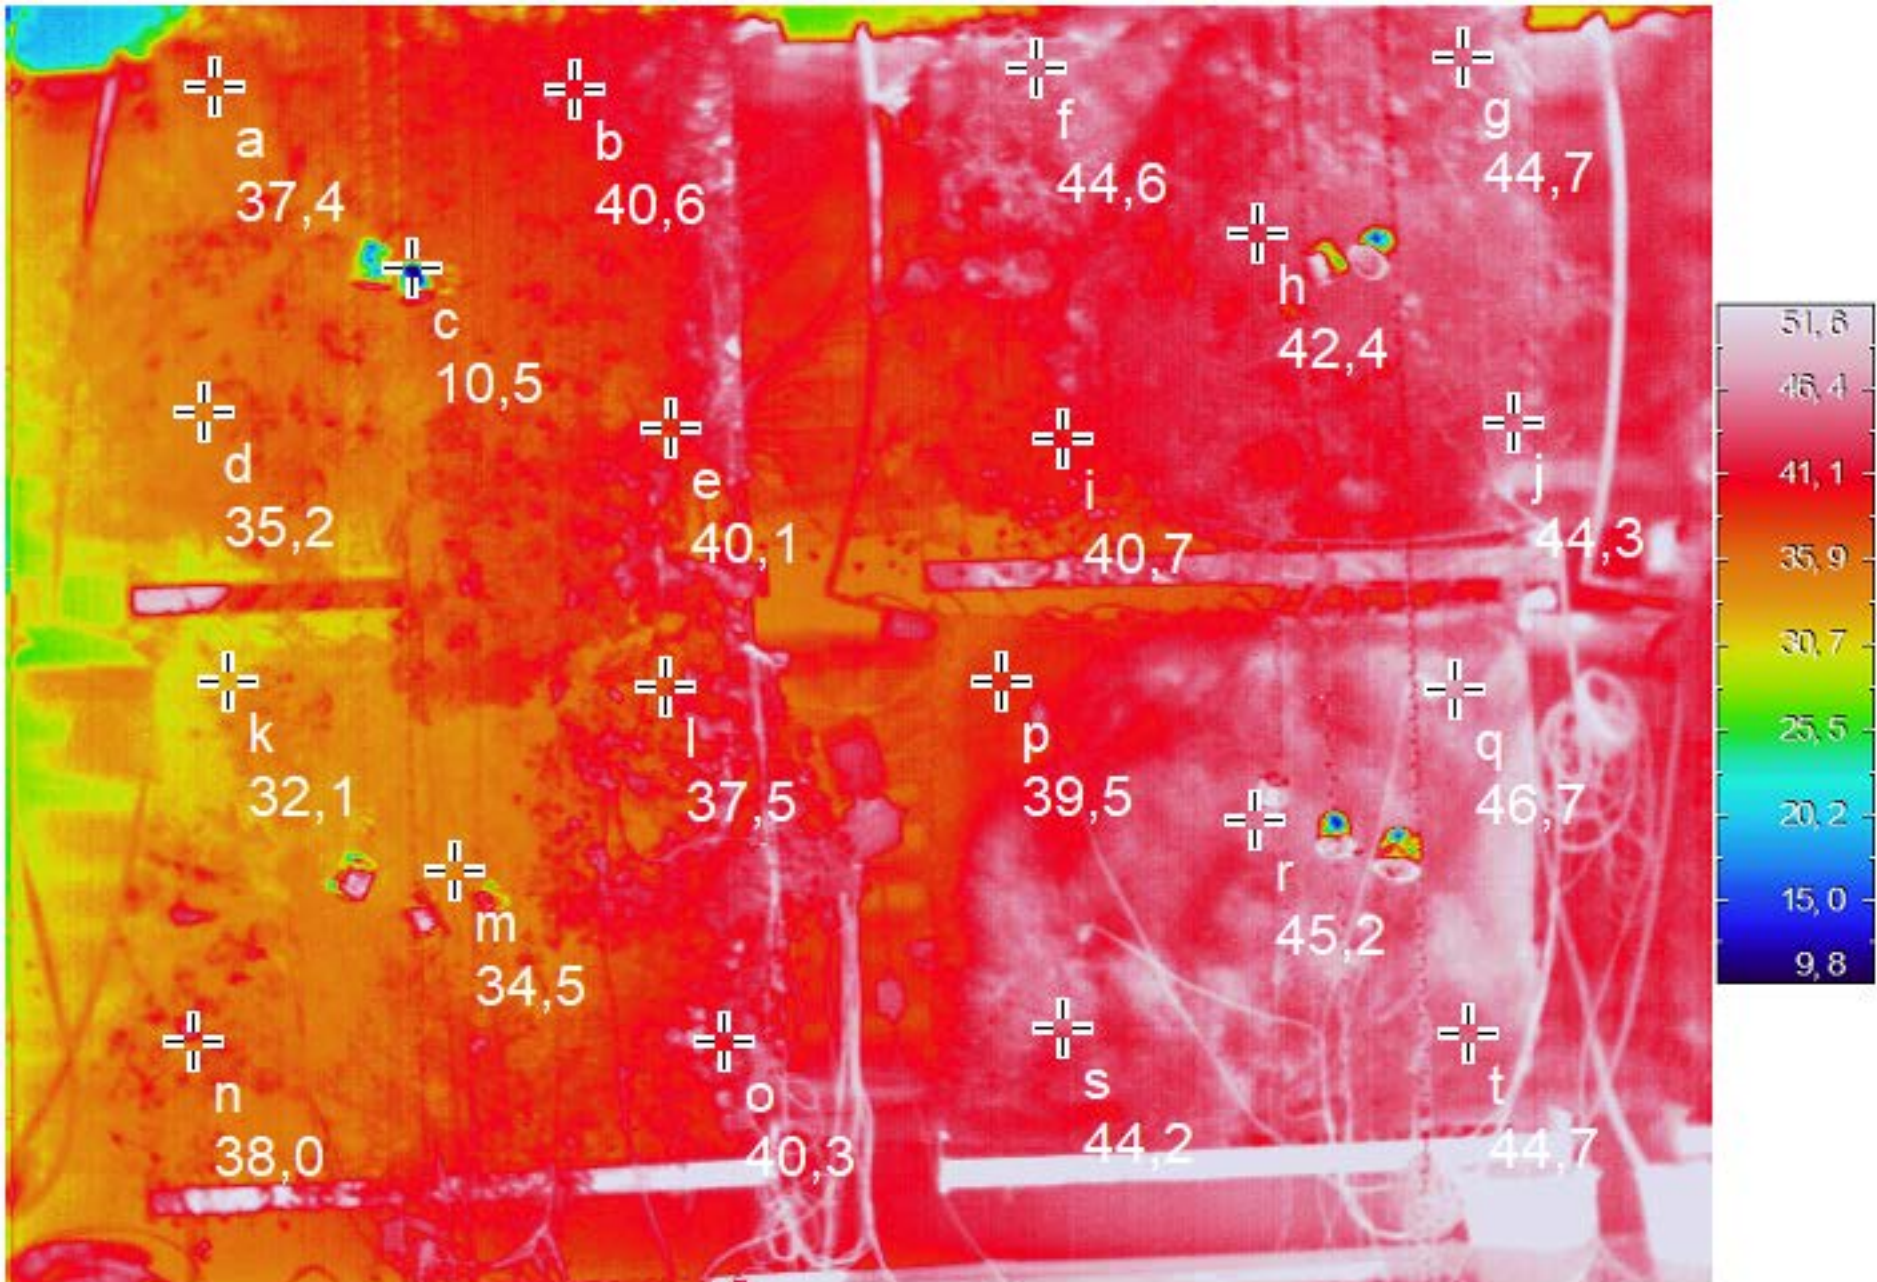

DateinameT02005IR.JPG  
Messtag:2019/06/18  
Messzeit:11:03:34  
Kommentar:  
Kameramodell:R500P  
Range:1[-20,0C-60,0C]  
BildmodusMEDx1,00  
Externes Objektiv:Standard  
Emissionsgrad:1.00  
Ambient Temp: 24,9IC  
IR Bildx1,00



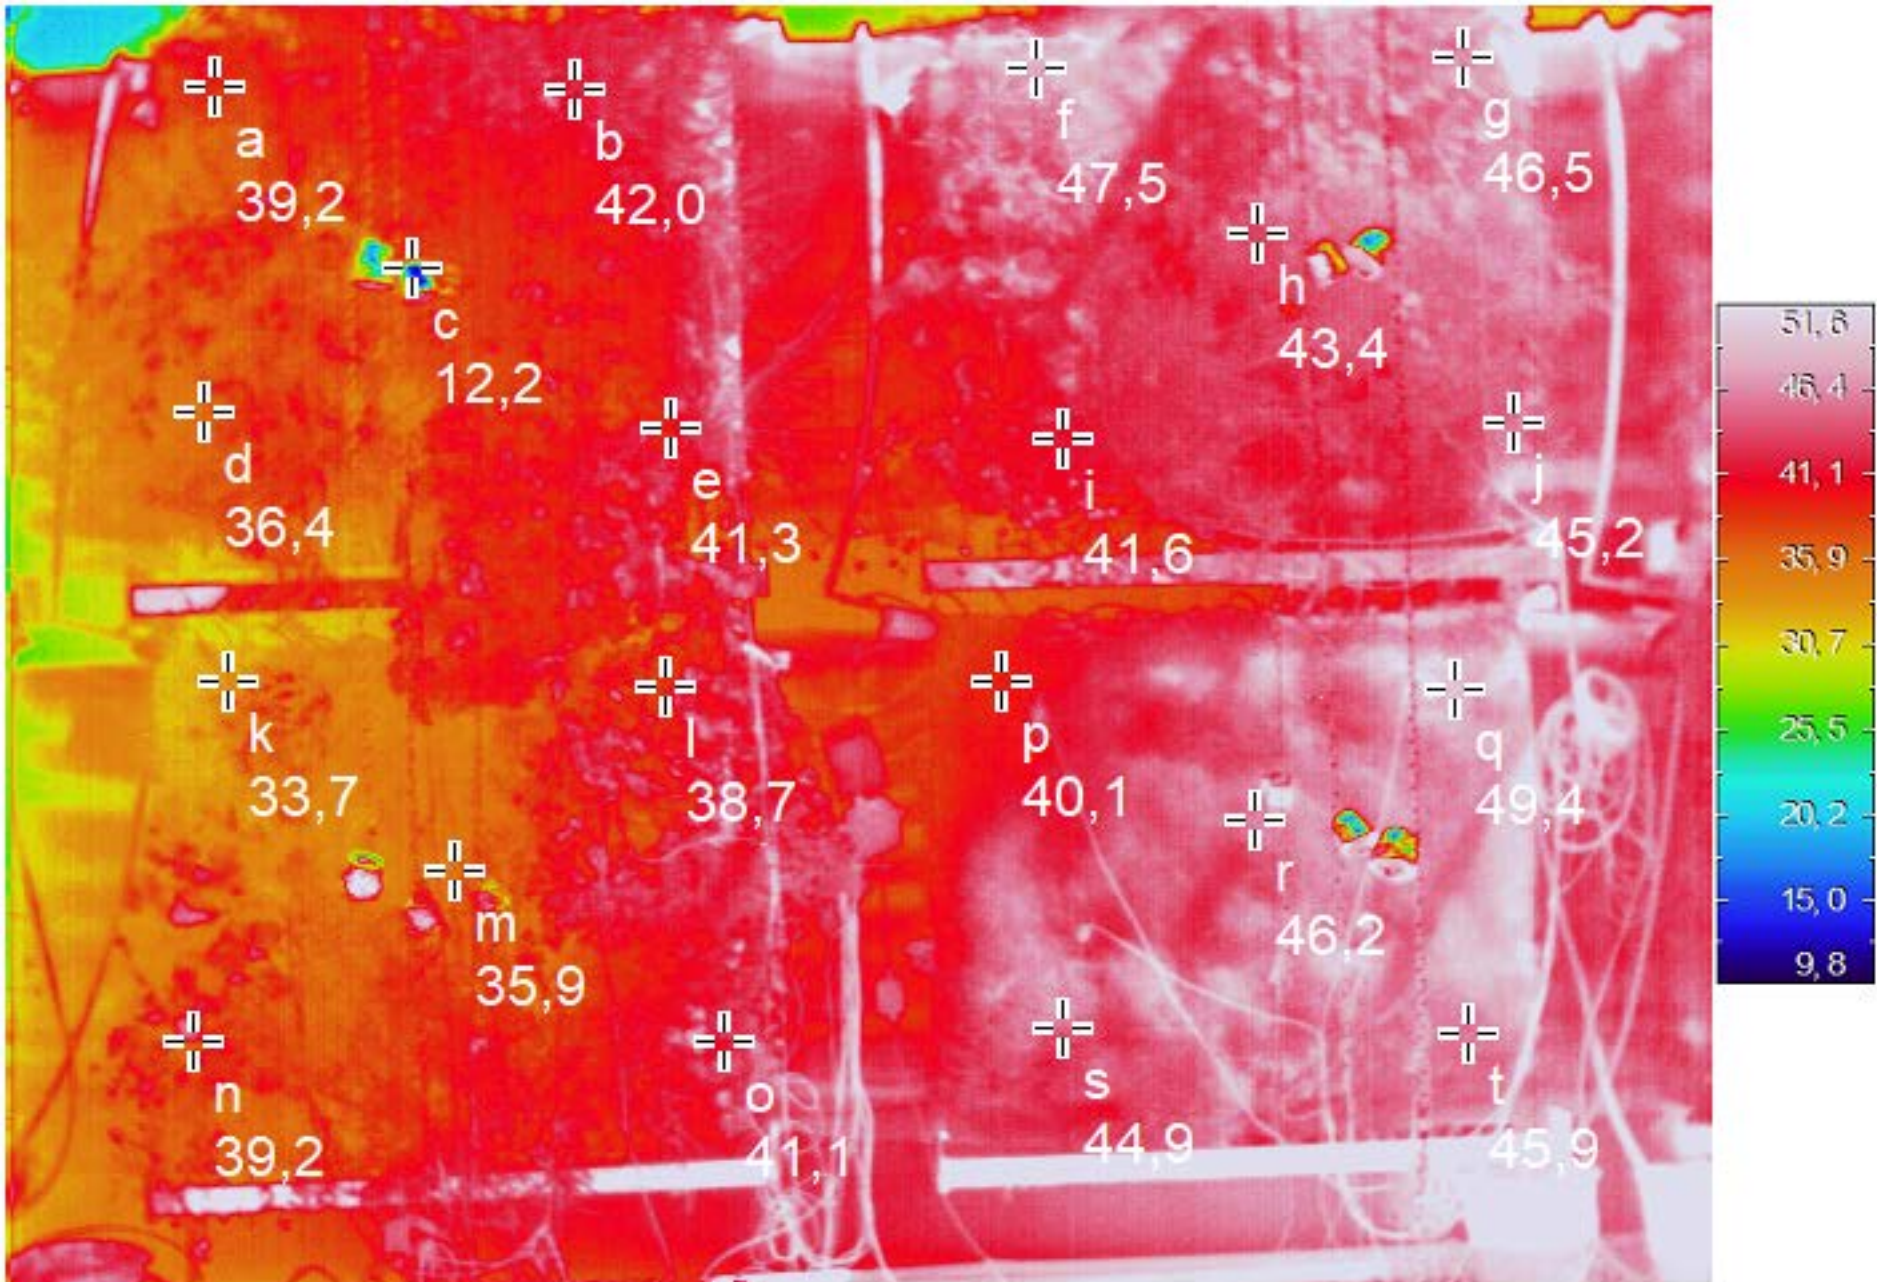

DateinameT02006IR.JPG  
Messtag:2019/06/18  
Messzeit:11:07:34  
Kommentar:  
Kameramodell:R500P  
Range:1[-20,0C-60,0C]  
BildmodusMEDx1,00  
Externes Objektiv:Standard  
Emissionsgrad:1.00  
Ambient Temp: 24,9IC  
IR Bildx1,00



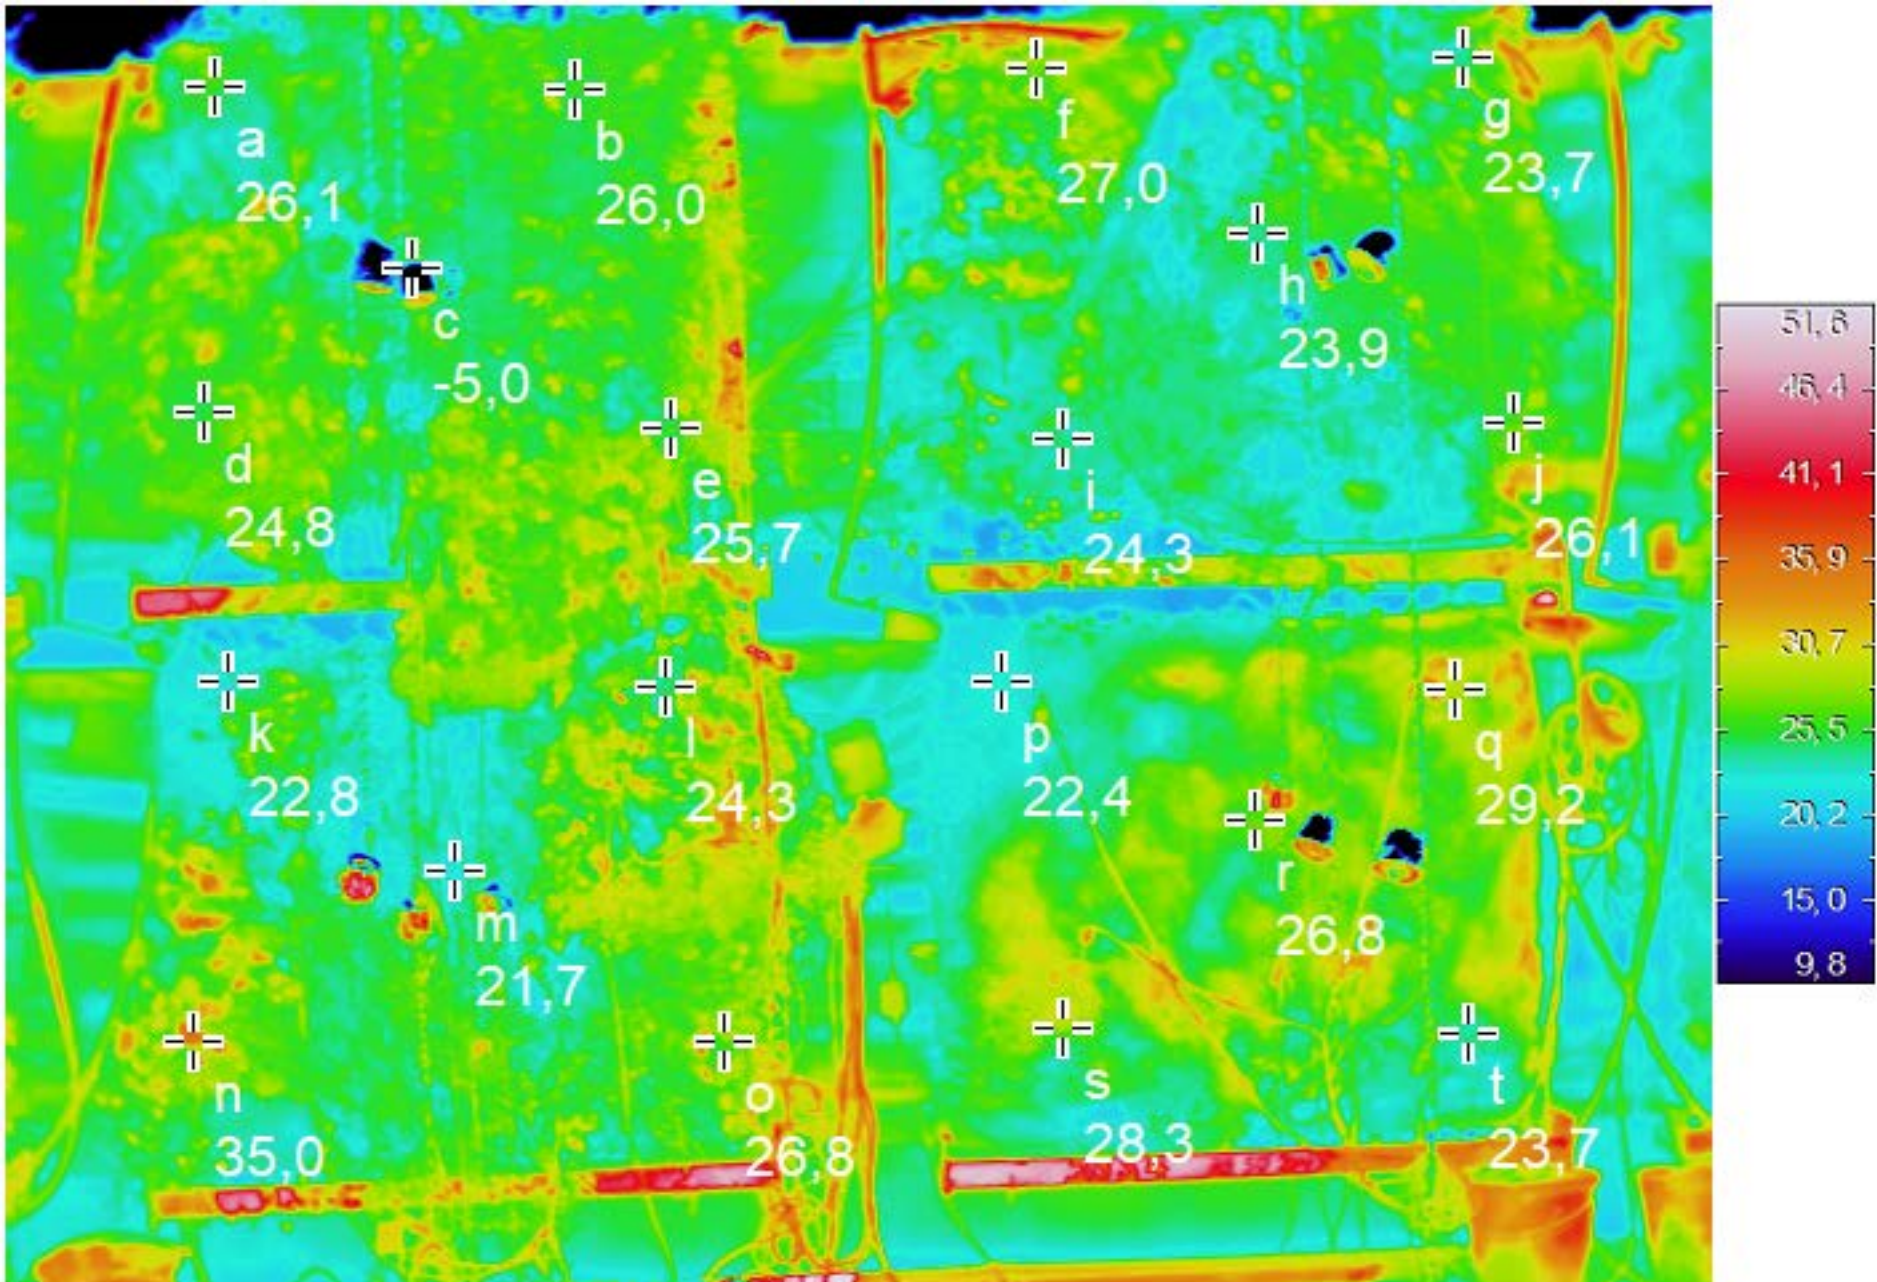

DateinameT02008IR.JPG  
Messtag:2019/06/18  
Messzeit:11:15:06  
Kommentar:  
Kameramodell:R500P  
Range:1[-20,0C-60,0C]  
BildmodusMEDx1,00  
Externes Objektiv:Standard  
Emissionsgrad:1.00  
Ambient Temp: 24,9IC  
IR Bildx1,00



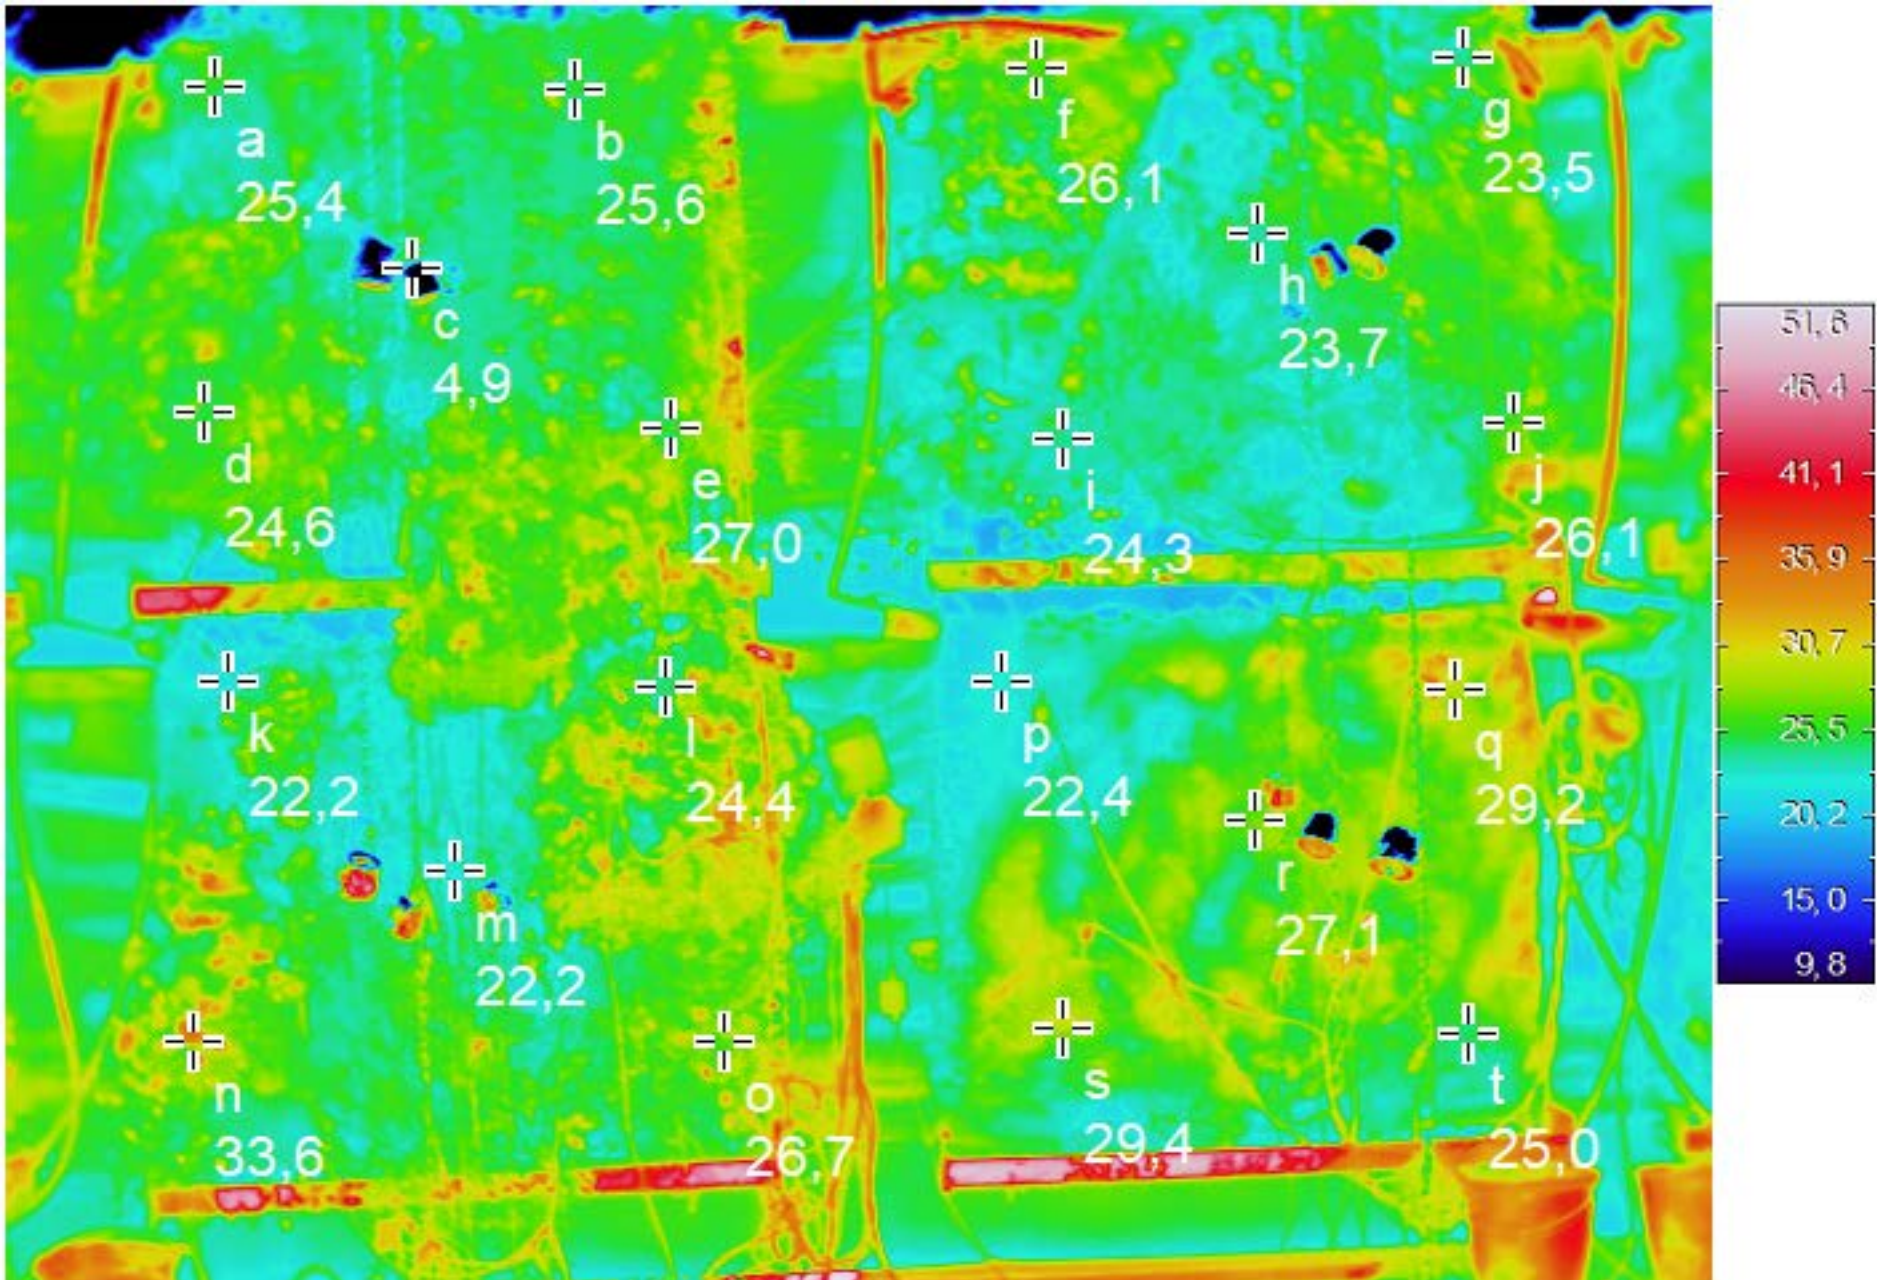

DateinameT02009IR.JPG  
Messtag:2019/06/18  
Messzeit:11:19:05  
Kommentar:  
Kameramodell:R500P  
Range:1[-20,0C-60,0C]  
BildmodusMEDx1,00  
Externes Objektiv:Standard  
Emissionsgrad:1.00  
Ambient Temp: 24,9IC  
IR Bildx1,00



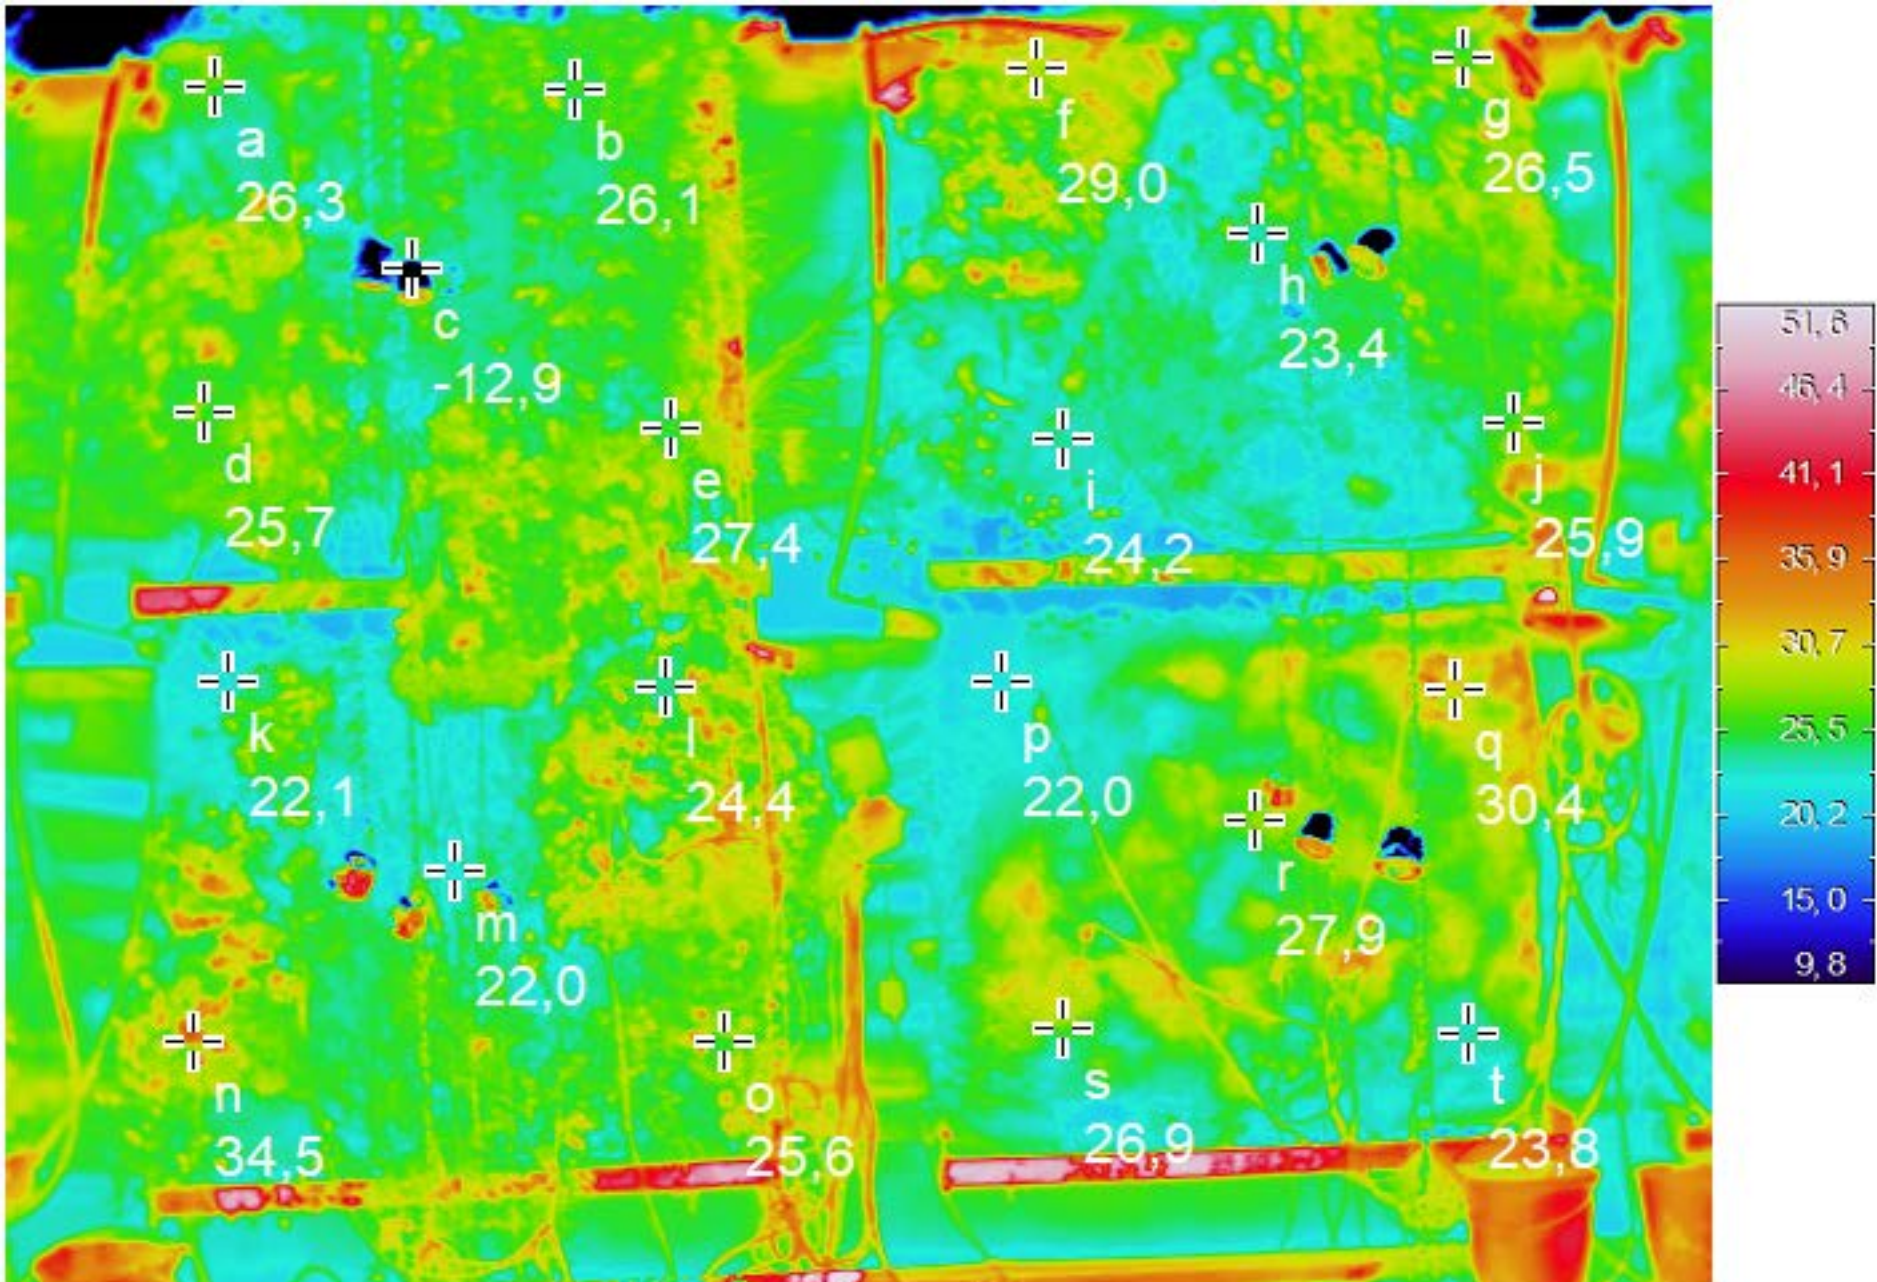

DateinameT02010IR.JPG  
Messtag:2019/06/18  
Messzeit:11:23:05  
Kommentar:  
Kameramodell:R500P  
Range:1[-20,0C-60,0C]  
BildmodusMEDx1,00  
Externes Objektiv:Standard  
Emissionsgrad:1.00  
Ambient Temp: 24,9IC  
IR Bildx1,00



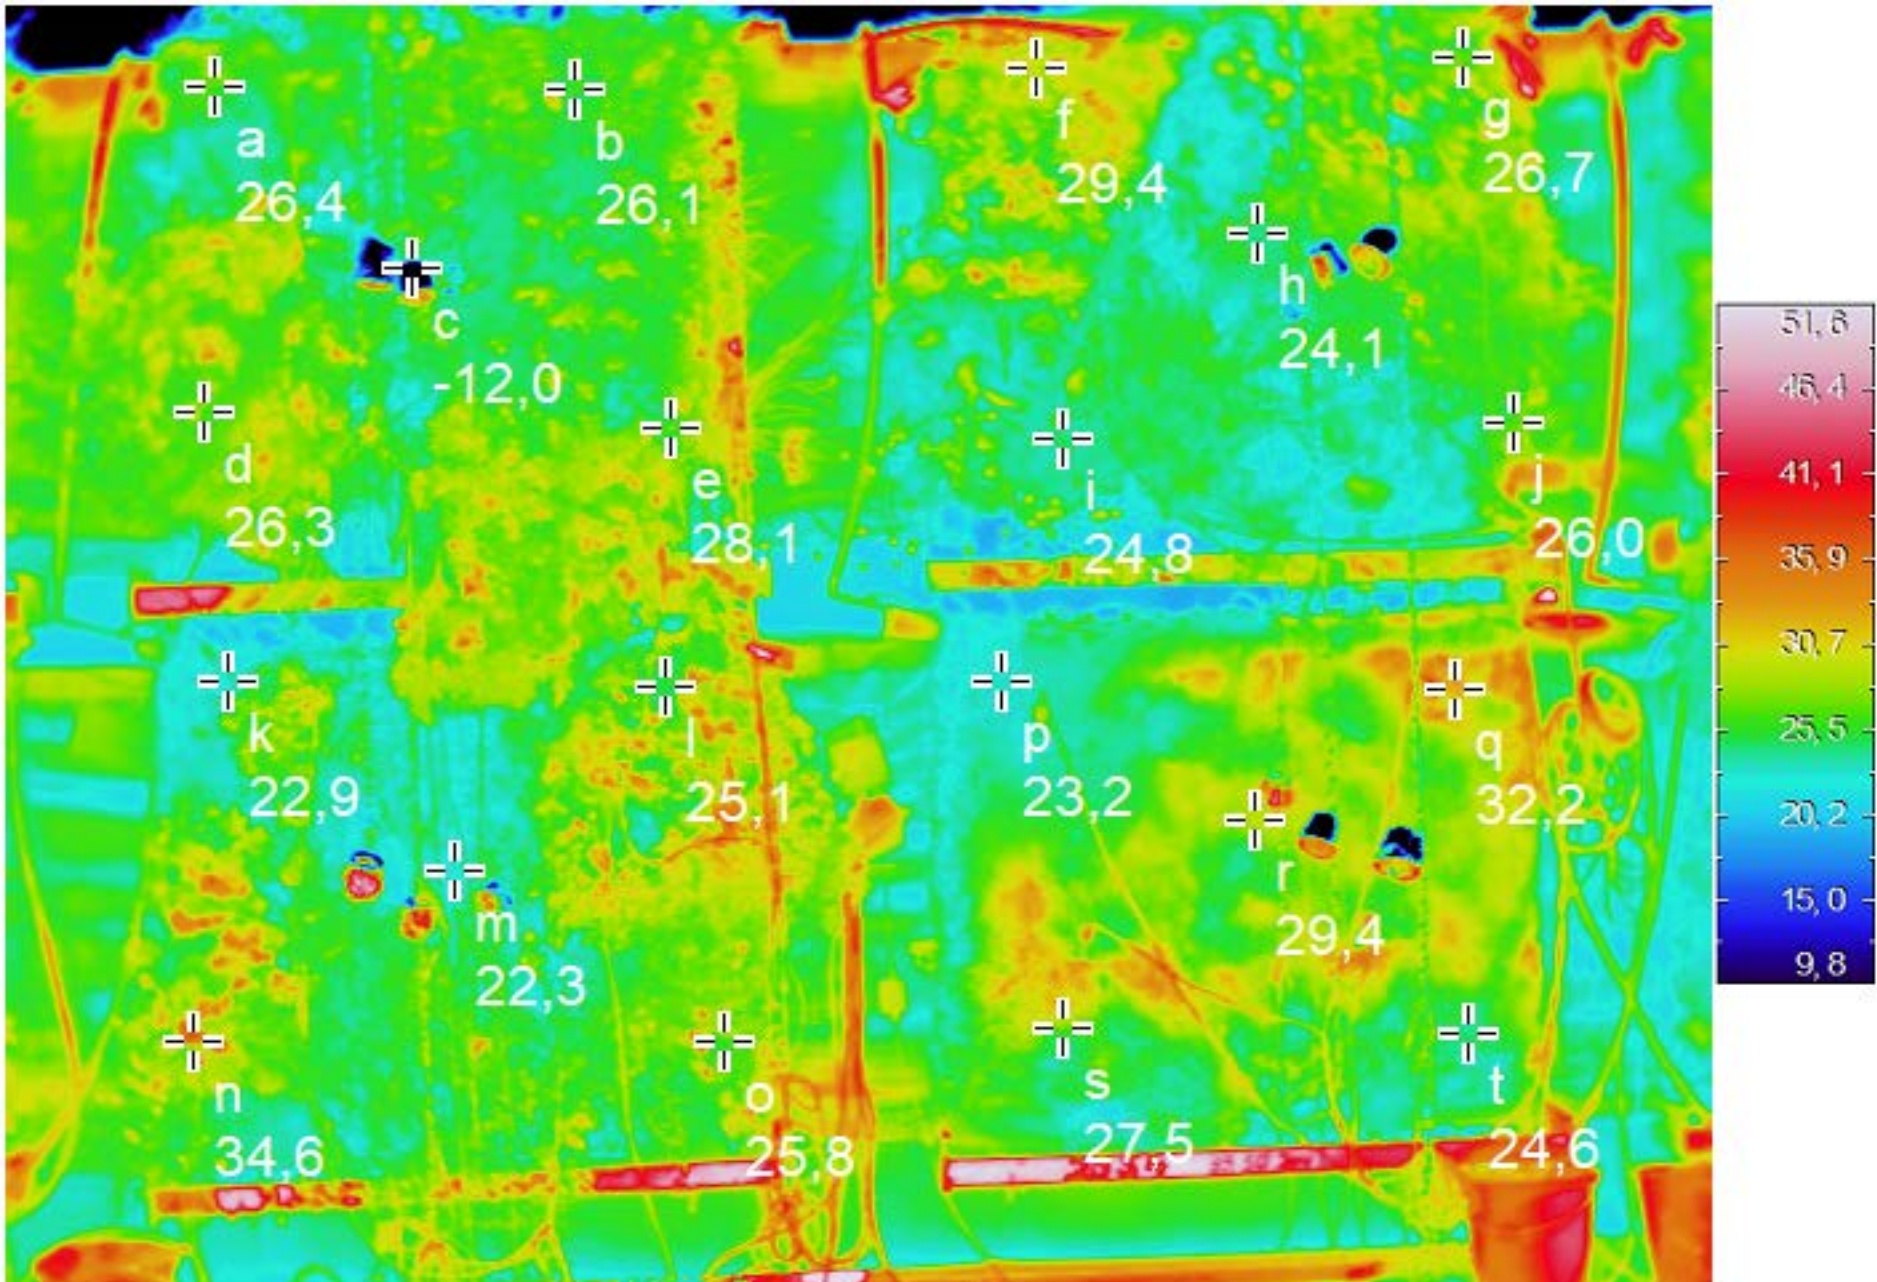

DateinameT02011IR.JPG  
Messtag:2019/06/18  
Messzeit:11:27:05  
Kommentar:  
Kameramodell:R500P  
Range:1[-20,0C-60,0C]  
BildmodusMEDx1,00  
Externes Objektiv:Standard  
Emissionsgrad:1.00  
Ambient Temp: 24,9IC  
IR Bildx1,00



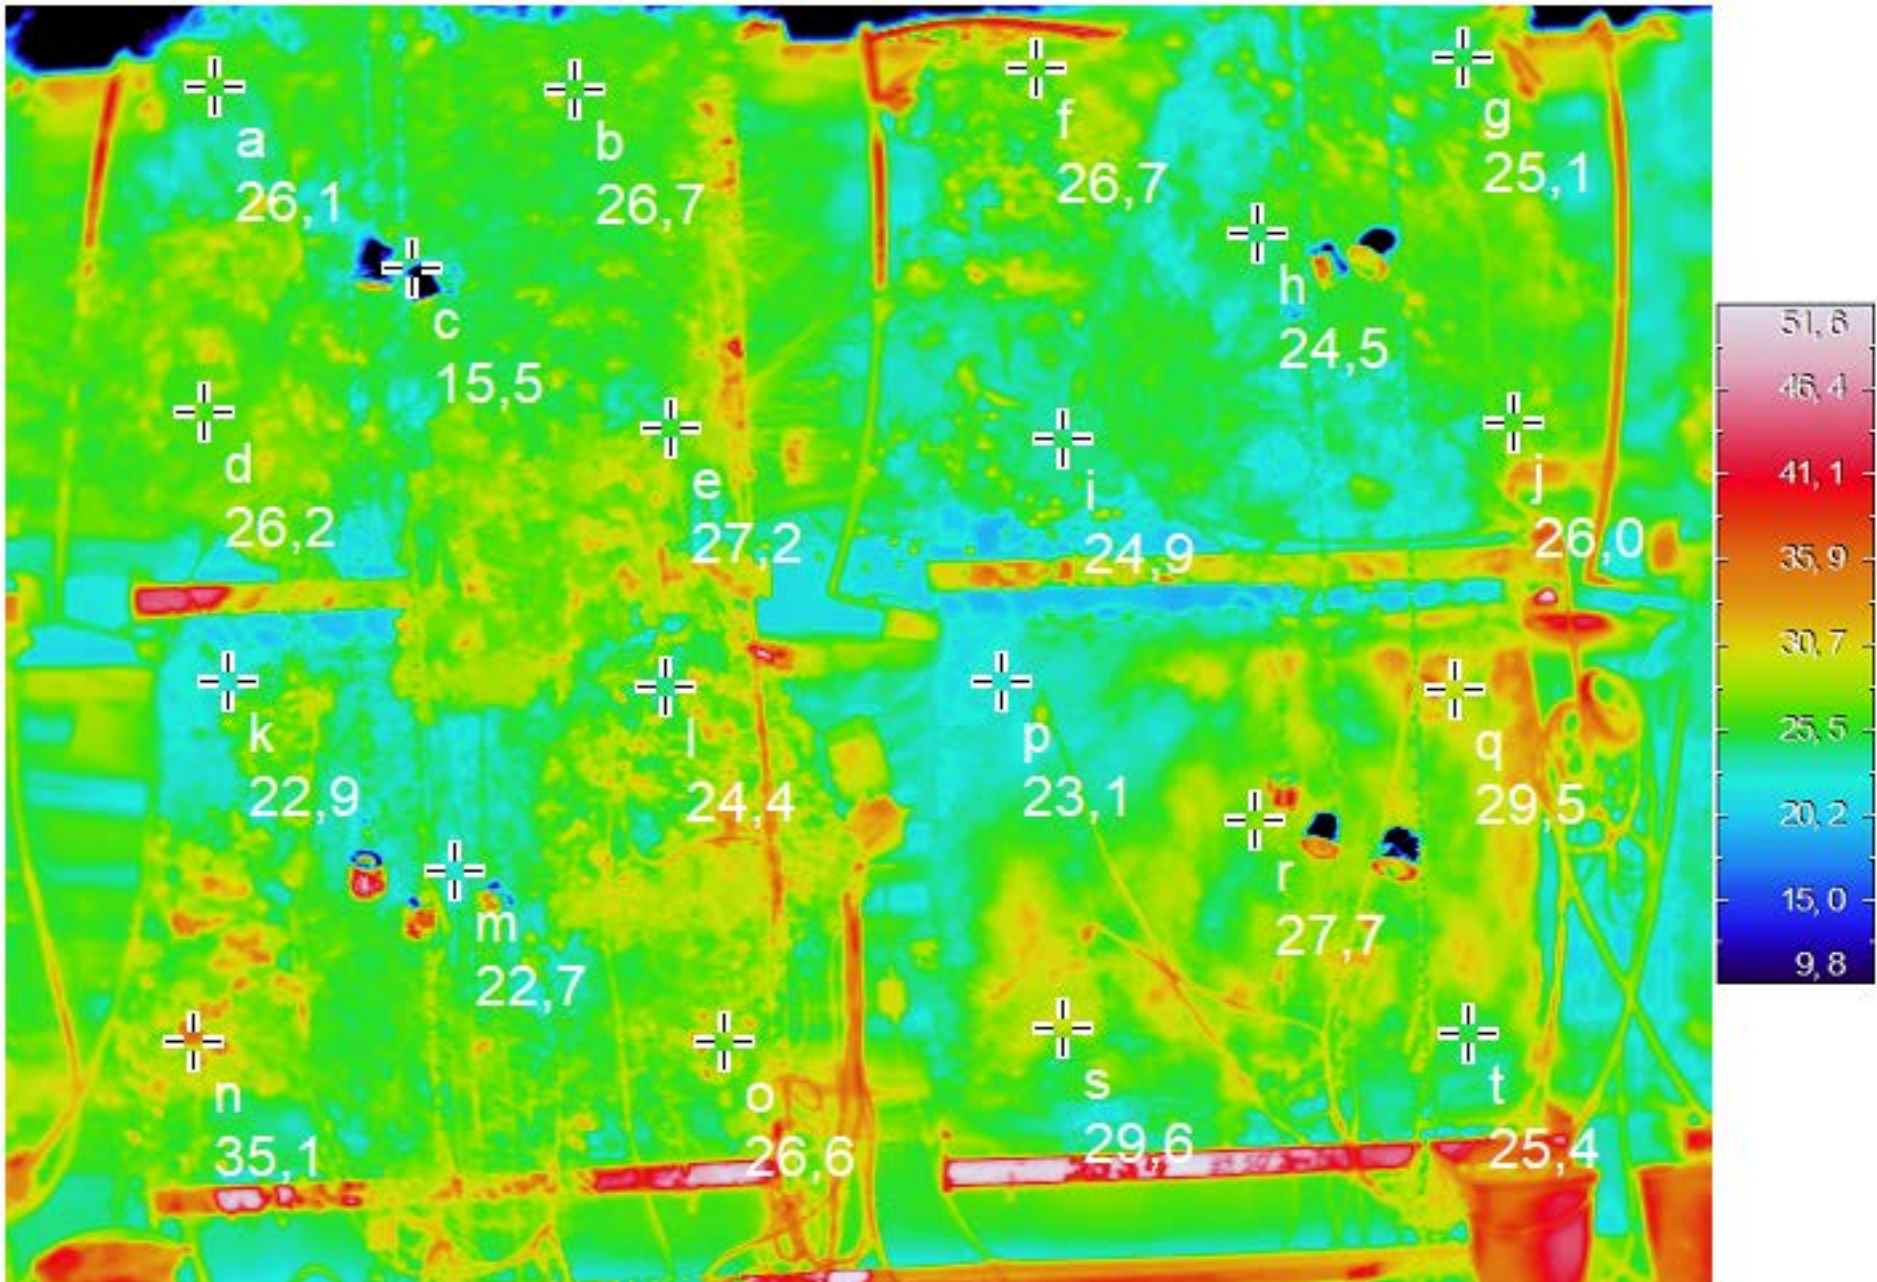

DateinameT02012IR.JPG  
Messtag:2019/06/18  
Messzeit:11:31:05  
Kommentar:  
Kameramodell:R500P  
Range:1[-20,0C-60,0C]  
BildmodusMEDx1,00  
Externes Objektiv:Standard  
Emissionsgrad:1.00  
Ambient Temp: 24,9IC  
IR Bildx1,00



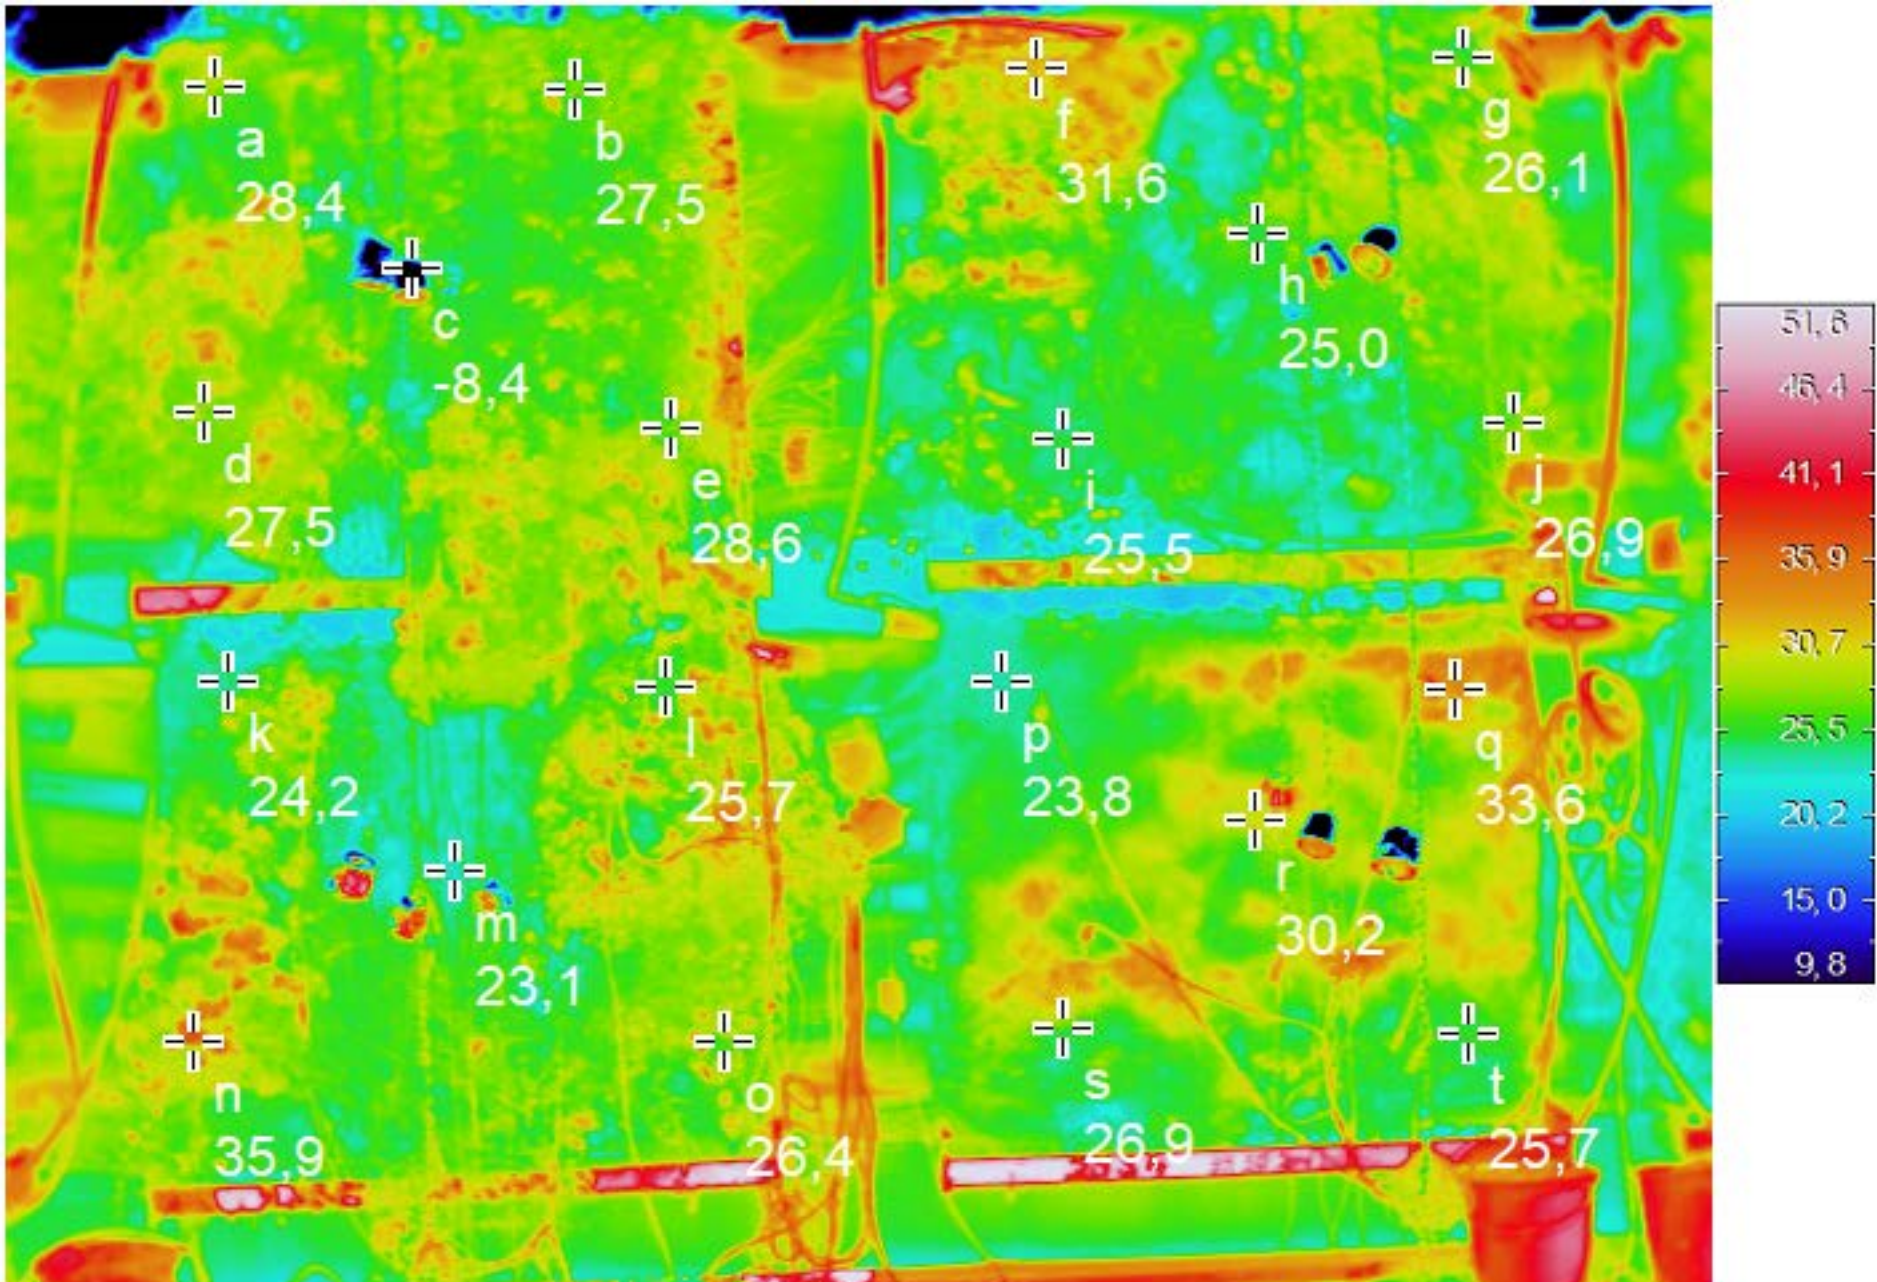

DateinameT02013IR.JPG  
Messtag:2019/06/18  
Messzeit:11:35:05  
Kommentar:  
Kameramodell:R500P  
Range:1[-20,0C-60,0C]  
BildmodusMEDx1,00  
Externes Objektiv:Standard  
Emissionsgrad:1.00  
Ambient Temp: 24,9IC  
IR Bildx1,00



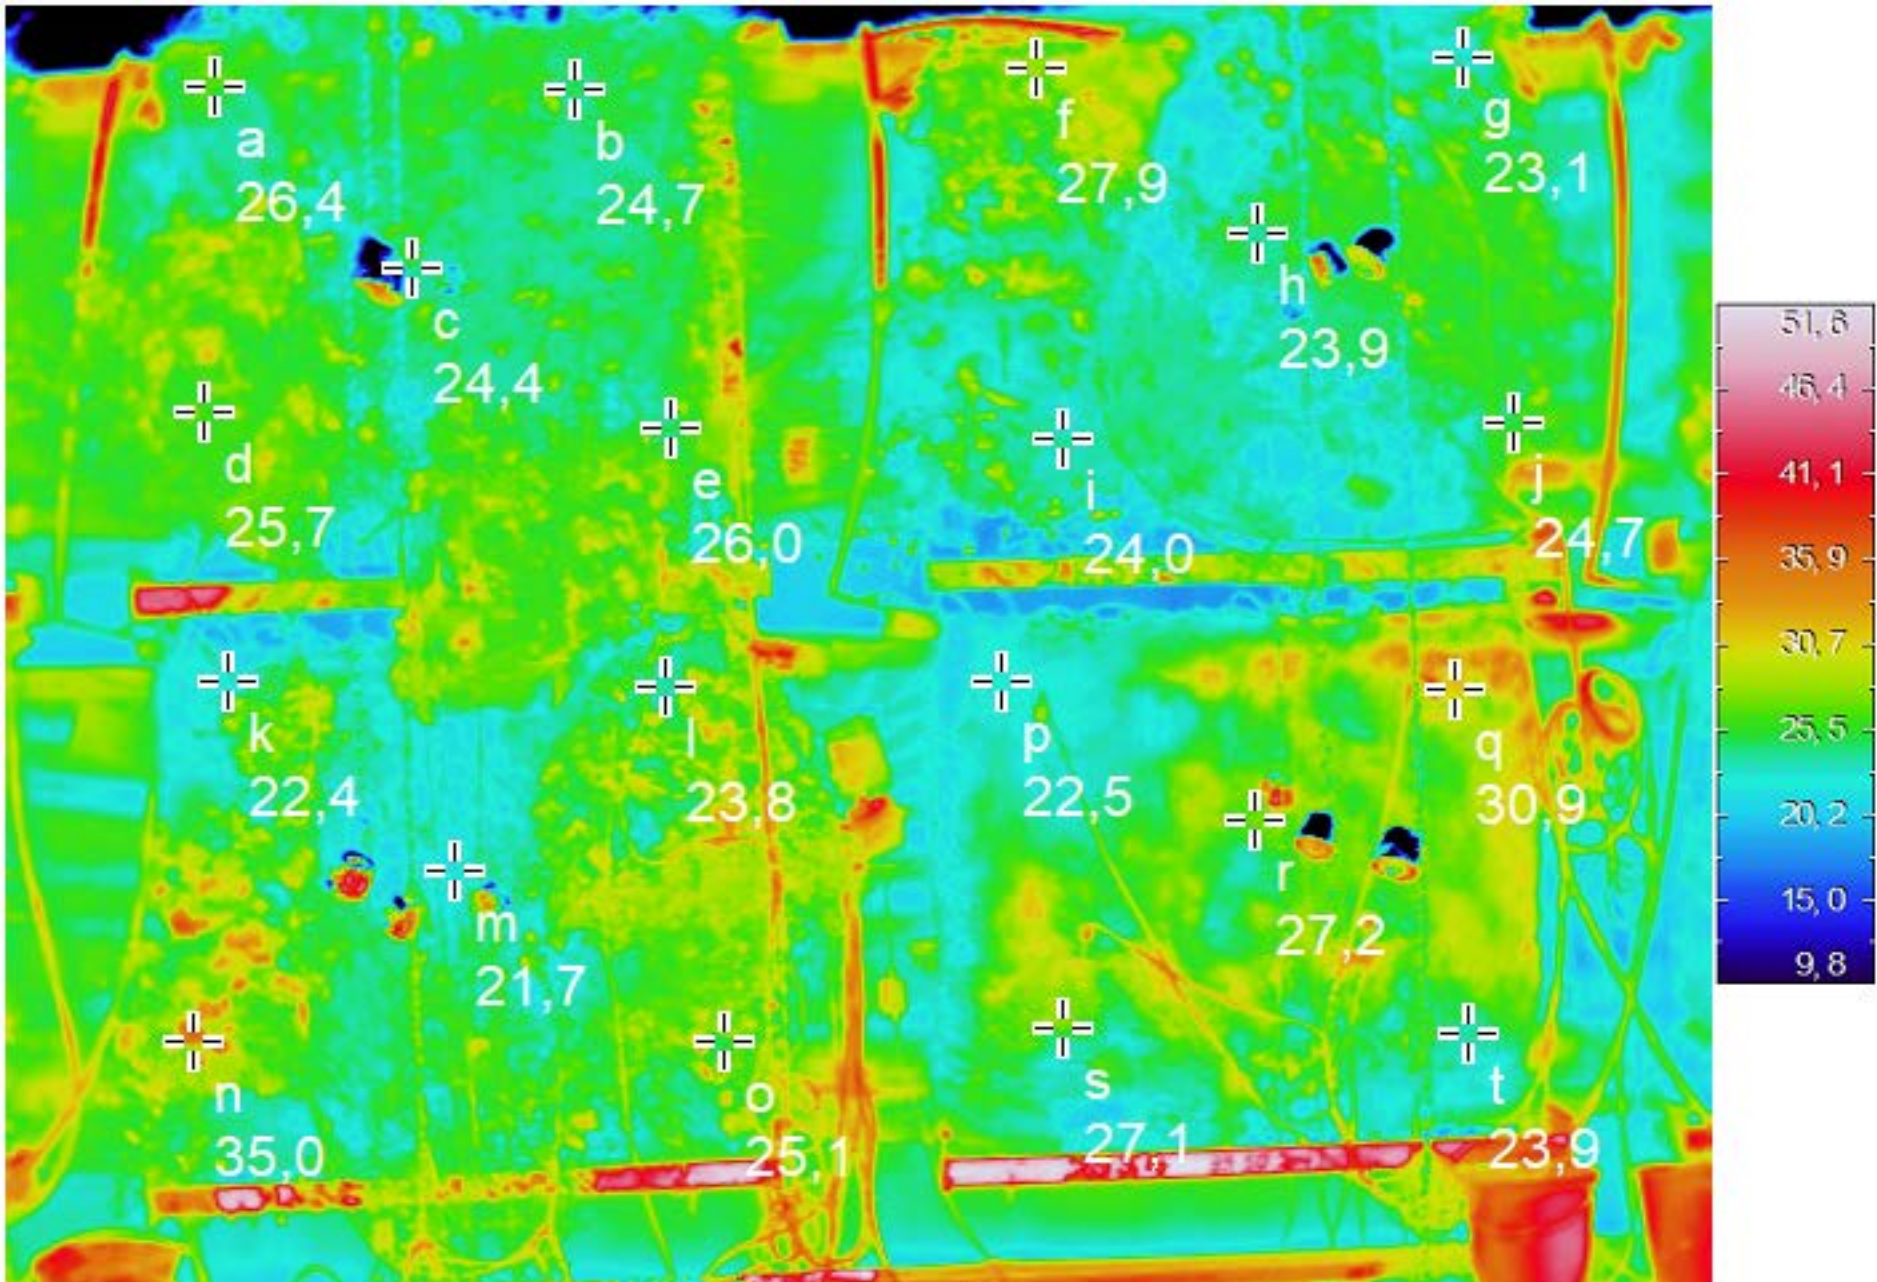

DateinameT02014IR.JPG  
Messtag:2019/06/18  
Messzeit:11:39:05  
Kommentar:  
Kameramodell:R500P  
Range:1[-20,0C-60,0C]  
BildmodusMEDx1,00  
Externes Objektiv:Standard  
Emissionsgrad:1.00  
Ambient Temp: 24,9IC  
IR Bildx1,00



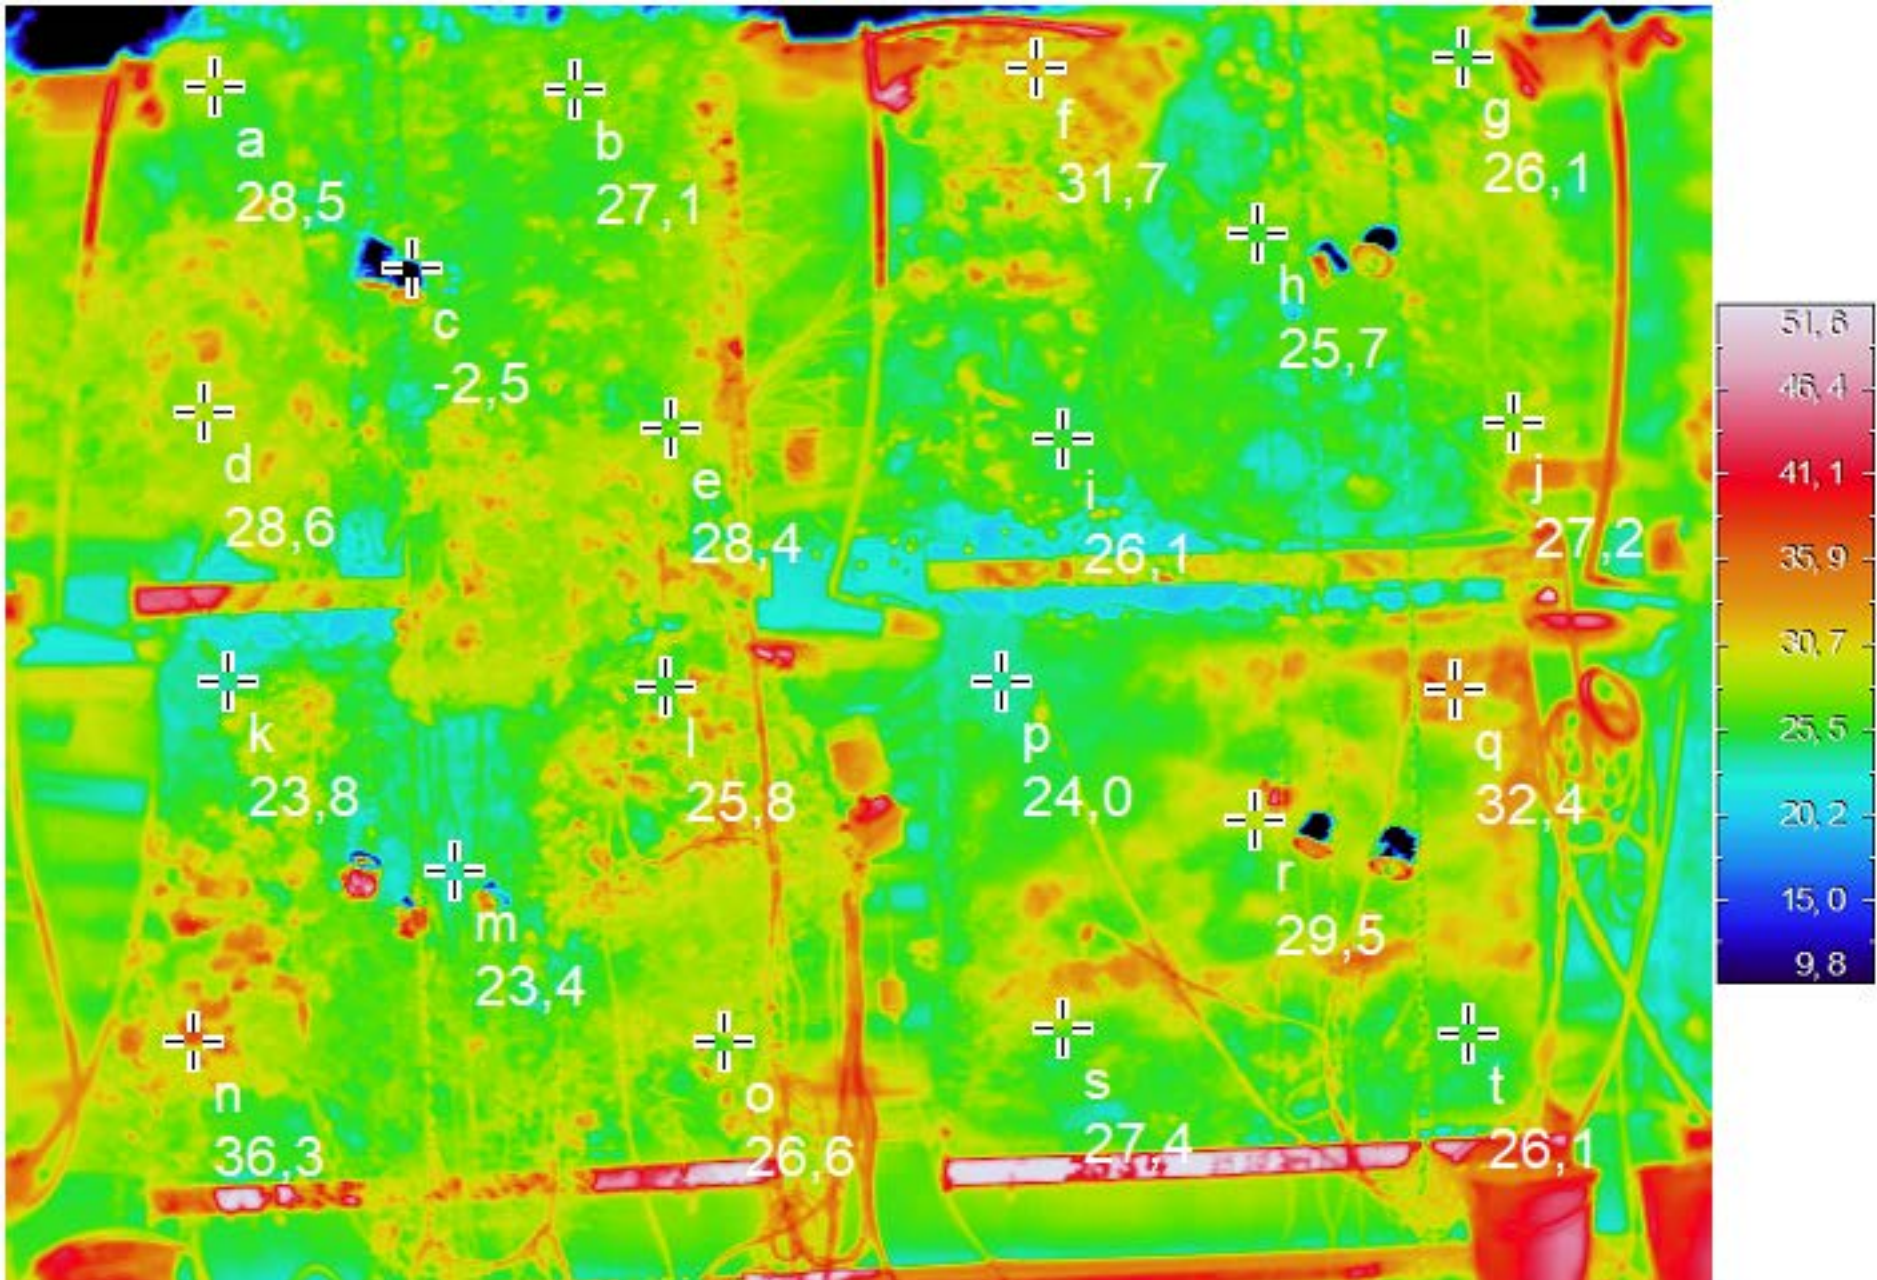

DateinameT02015IR.JPG  
Messtag:2019/06/18  
Messzeit:11:43:05  
Kommentar:  
Kameramodell:R500P  
Range:1[-20,0C-60,0C]  
BildmodusMEDx1,00  
Externes Objektiv:Standard  
Emissionsgrad:1.00  
Ambient Temp: 24,9IC  
IR Bildx1,00



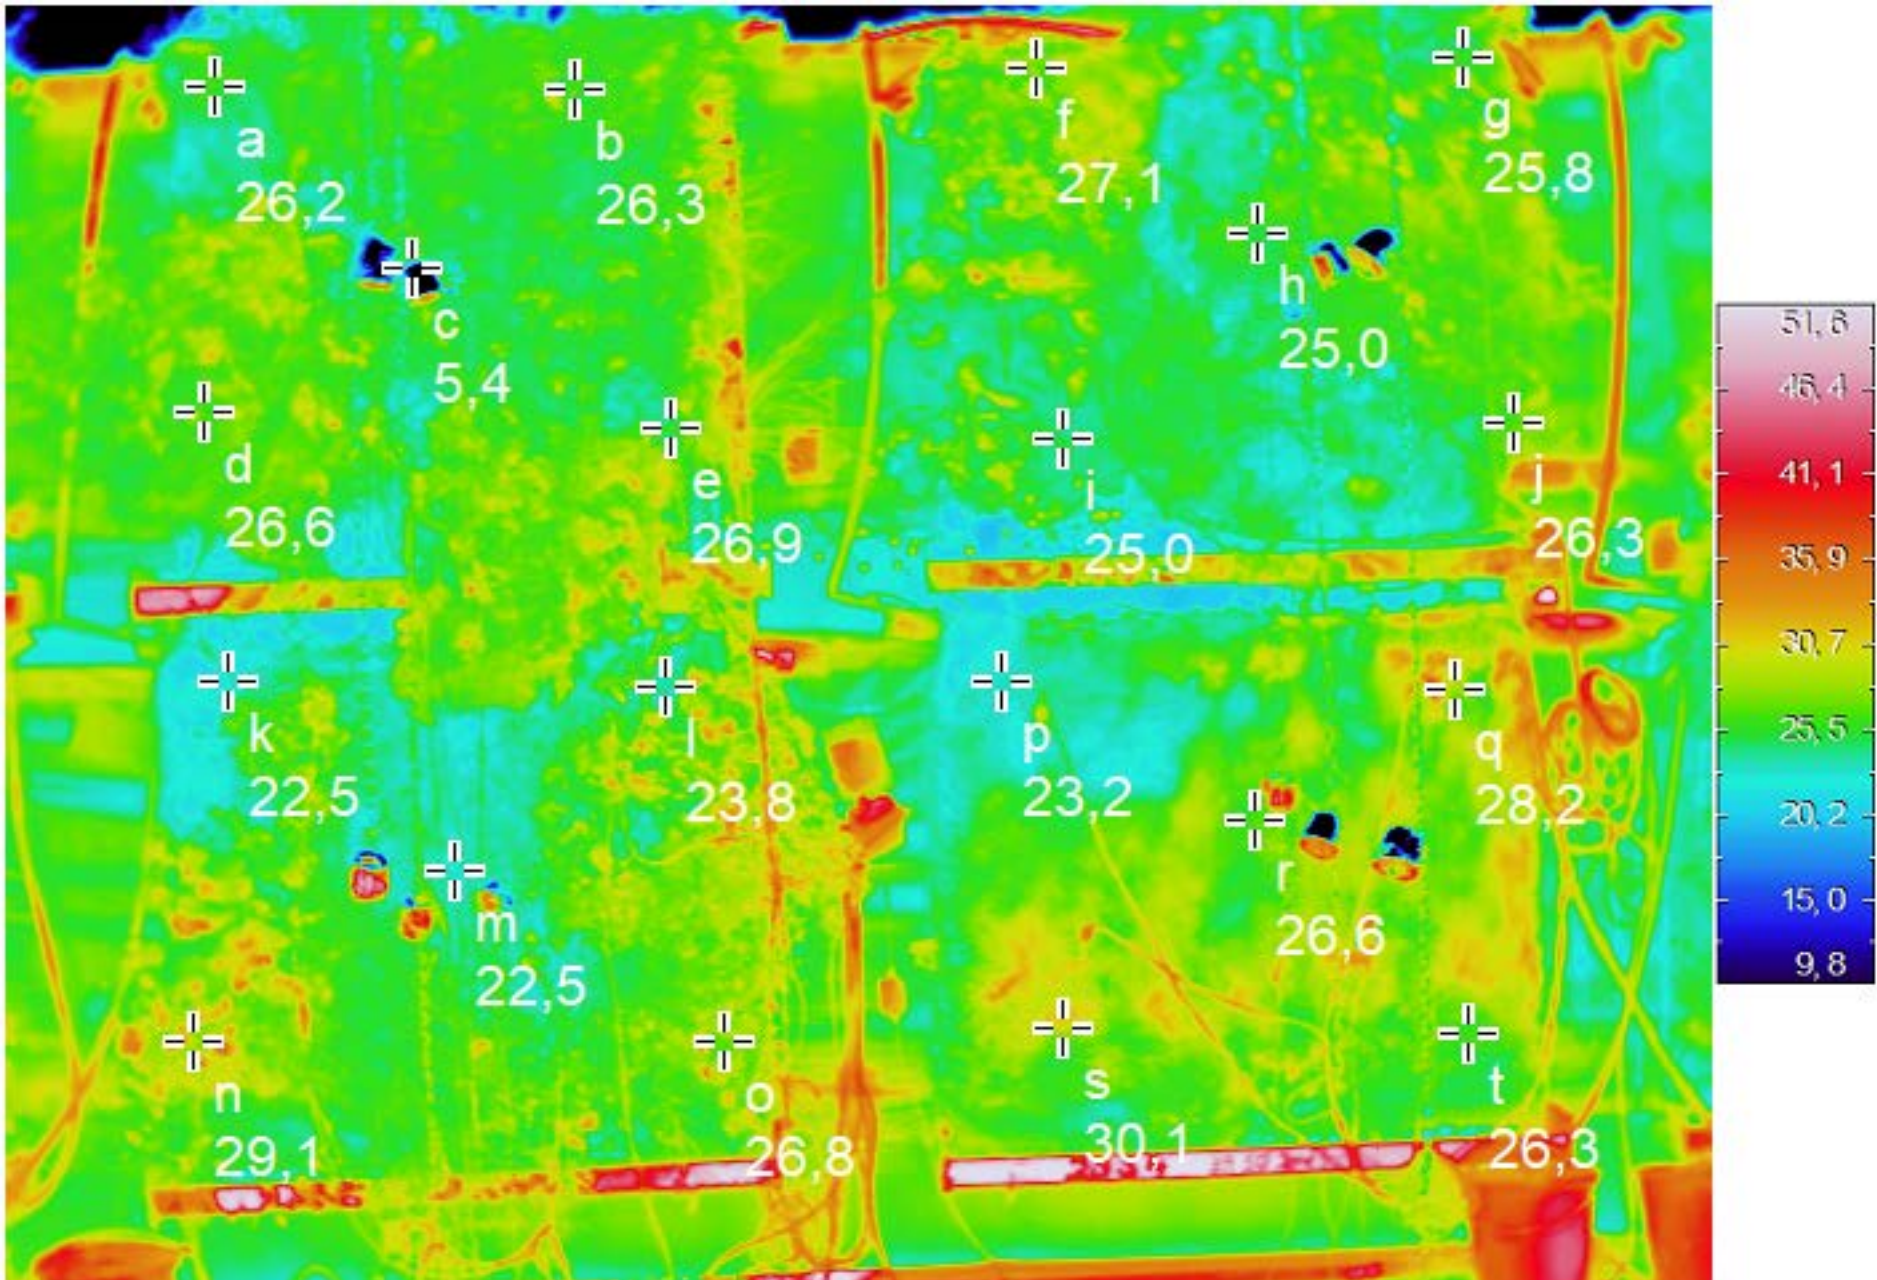

DateinameT02016IR.JPG  
Messtag:2019/06/18  
Messzeit:11:47:05  
Kommentar:  
Kameramodell:R500P  
Range:1[-20,0C-60,0C]  
BildmodusMEDx1,00  
Externes Objektiv:Standard  
Emissionsgrad:1.00  
Ambient Temp: 24,9IC  
IR Bildx1,00



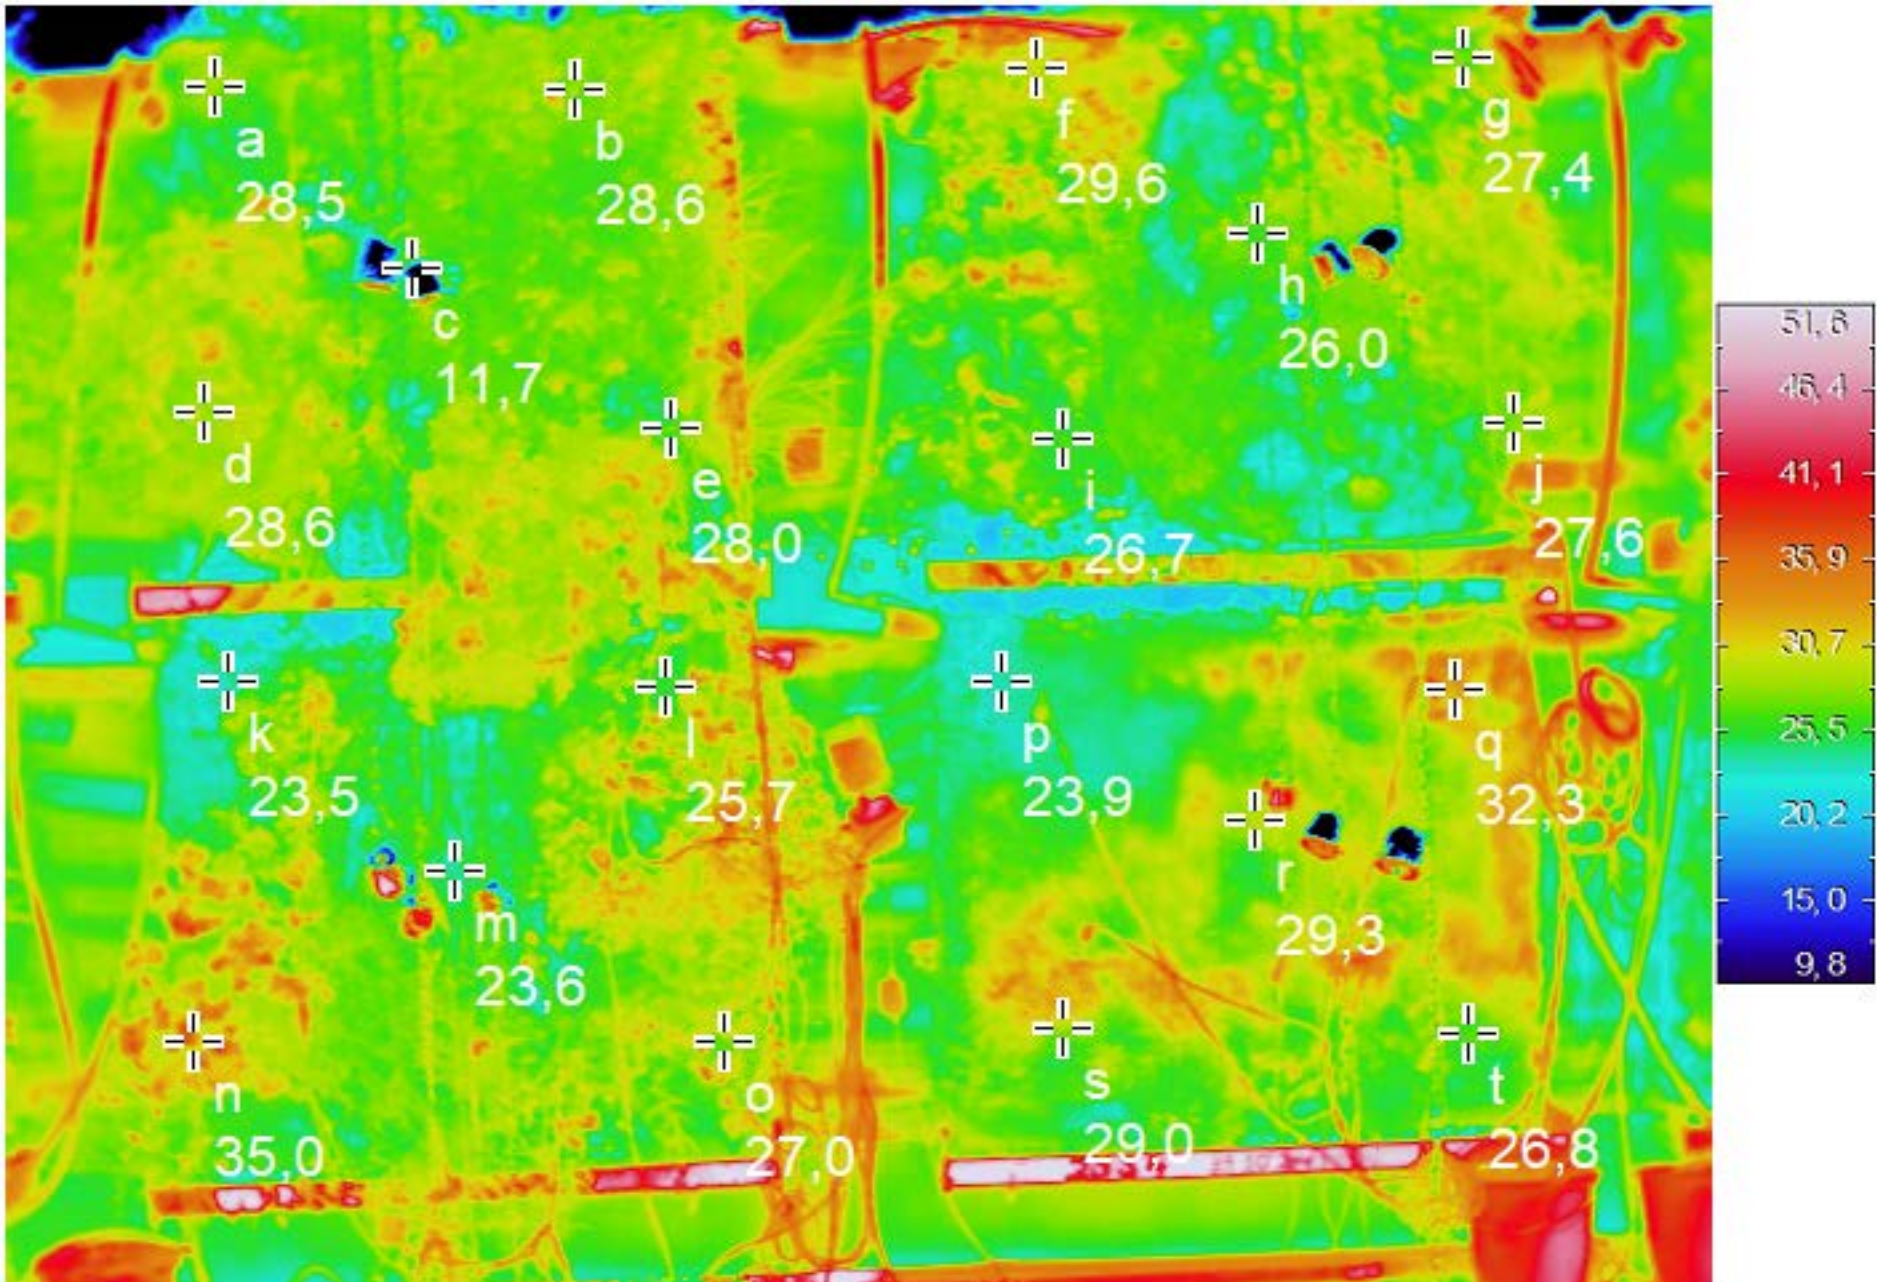

DateinameT02017IR.JPG  
Messtag:2019/06/18  
Messzeit:11:51:05  
Kommentar:  
Kameramodell:R500P  
Range:1[-20,0C-60,0C]  
BildmodusMEDx1,00  
Externes Objektiv:Standard  
Emissionsgrad:1.00  
Ambient Temp: 24,9IC  
IR Bildx1,00



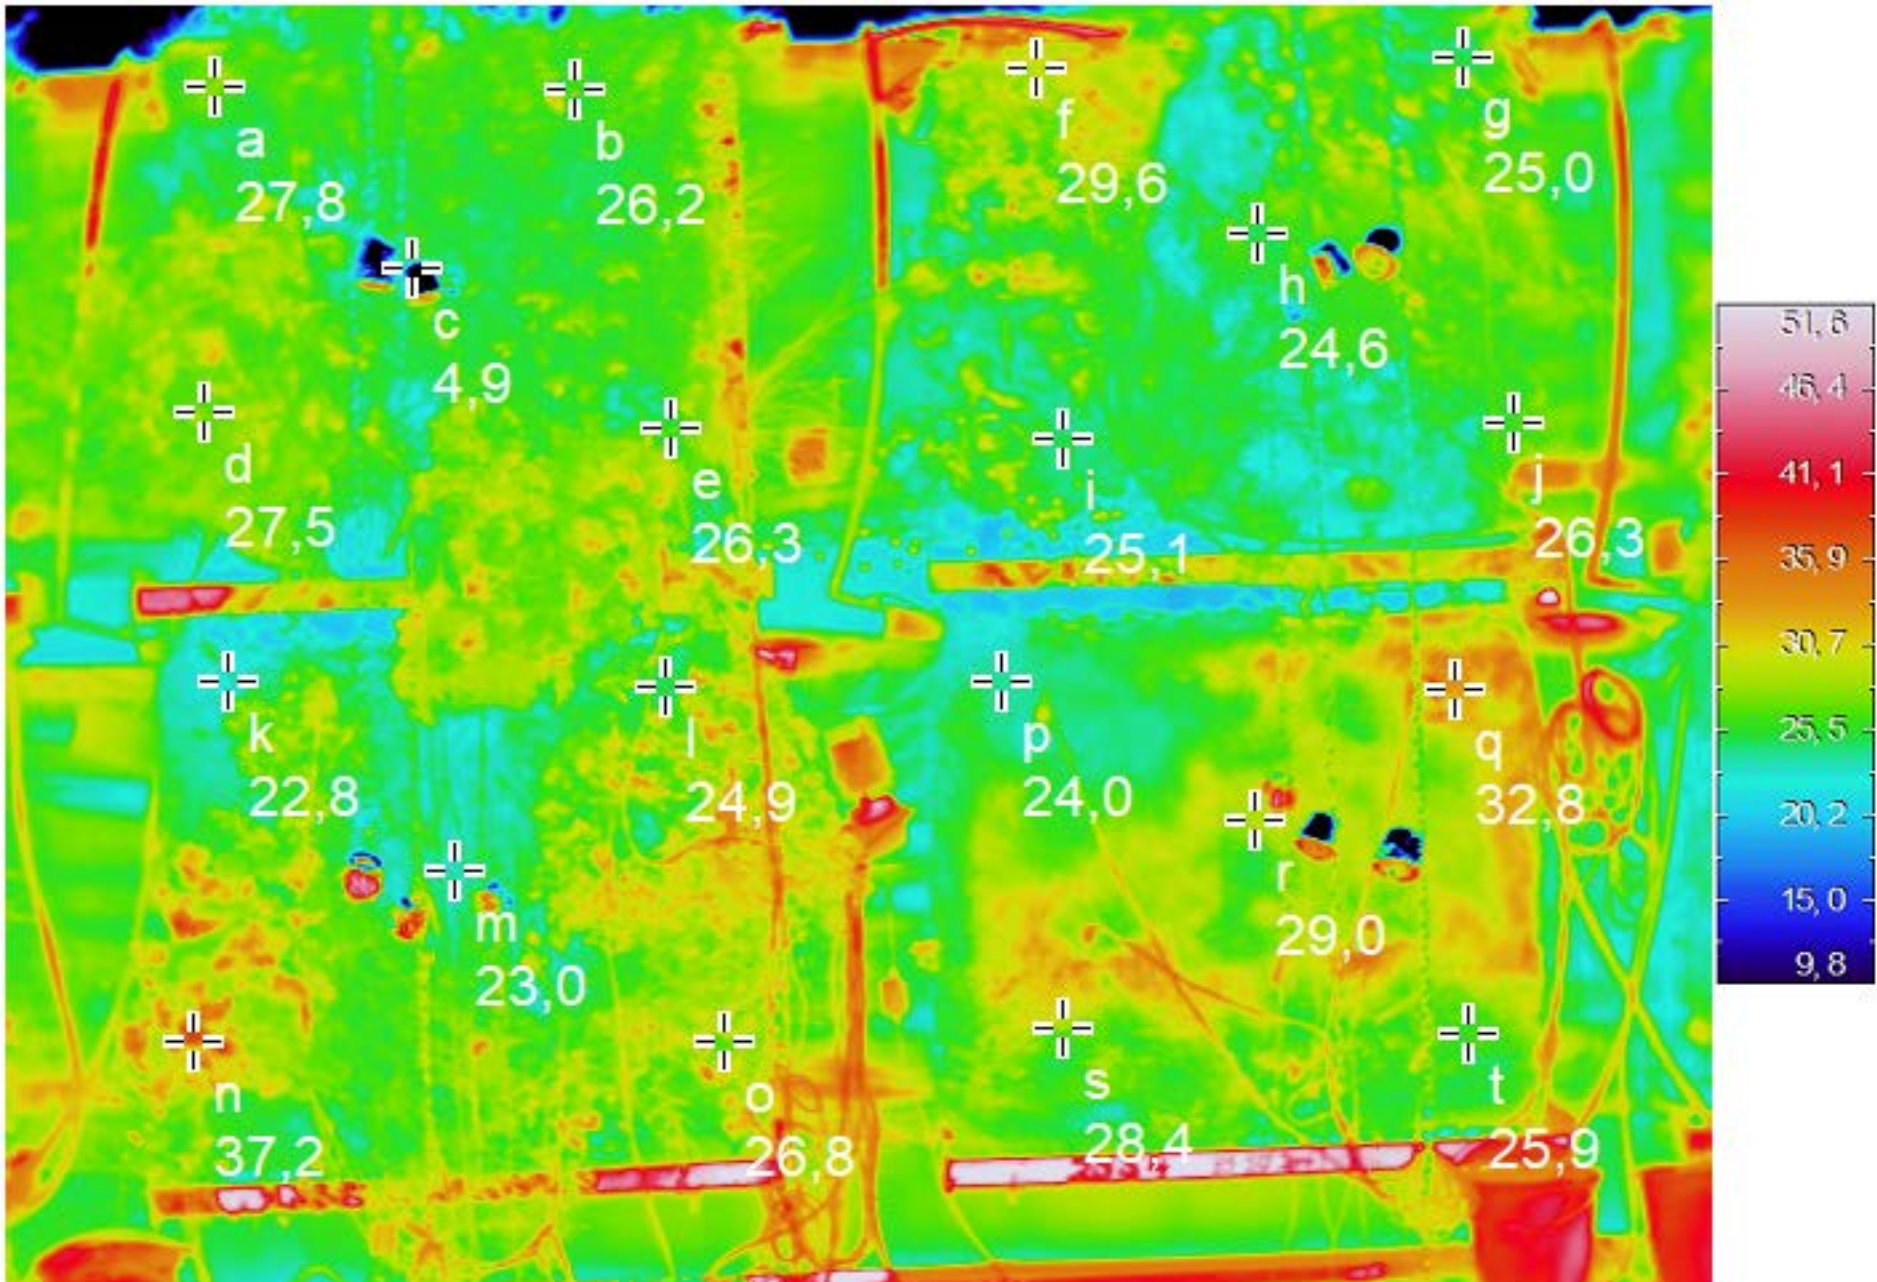

DateinameT02018IR.JPG  
Messtag:2019/06/18  
Messzeit:11:55:13  
Kommentar:  
Kameramodell:R500P  
Range:1[-20,0C-60,0C]  
BildmodusMEDx1,00  
Externes Objektiv:Standard  
Emissionsgrad:1.00  
Ambient Temp: 24,9IC  
IR Bildx1,00



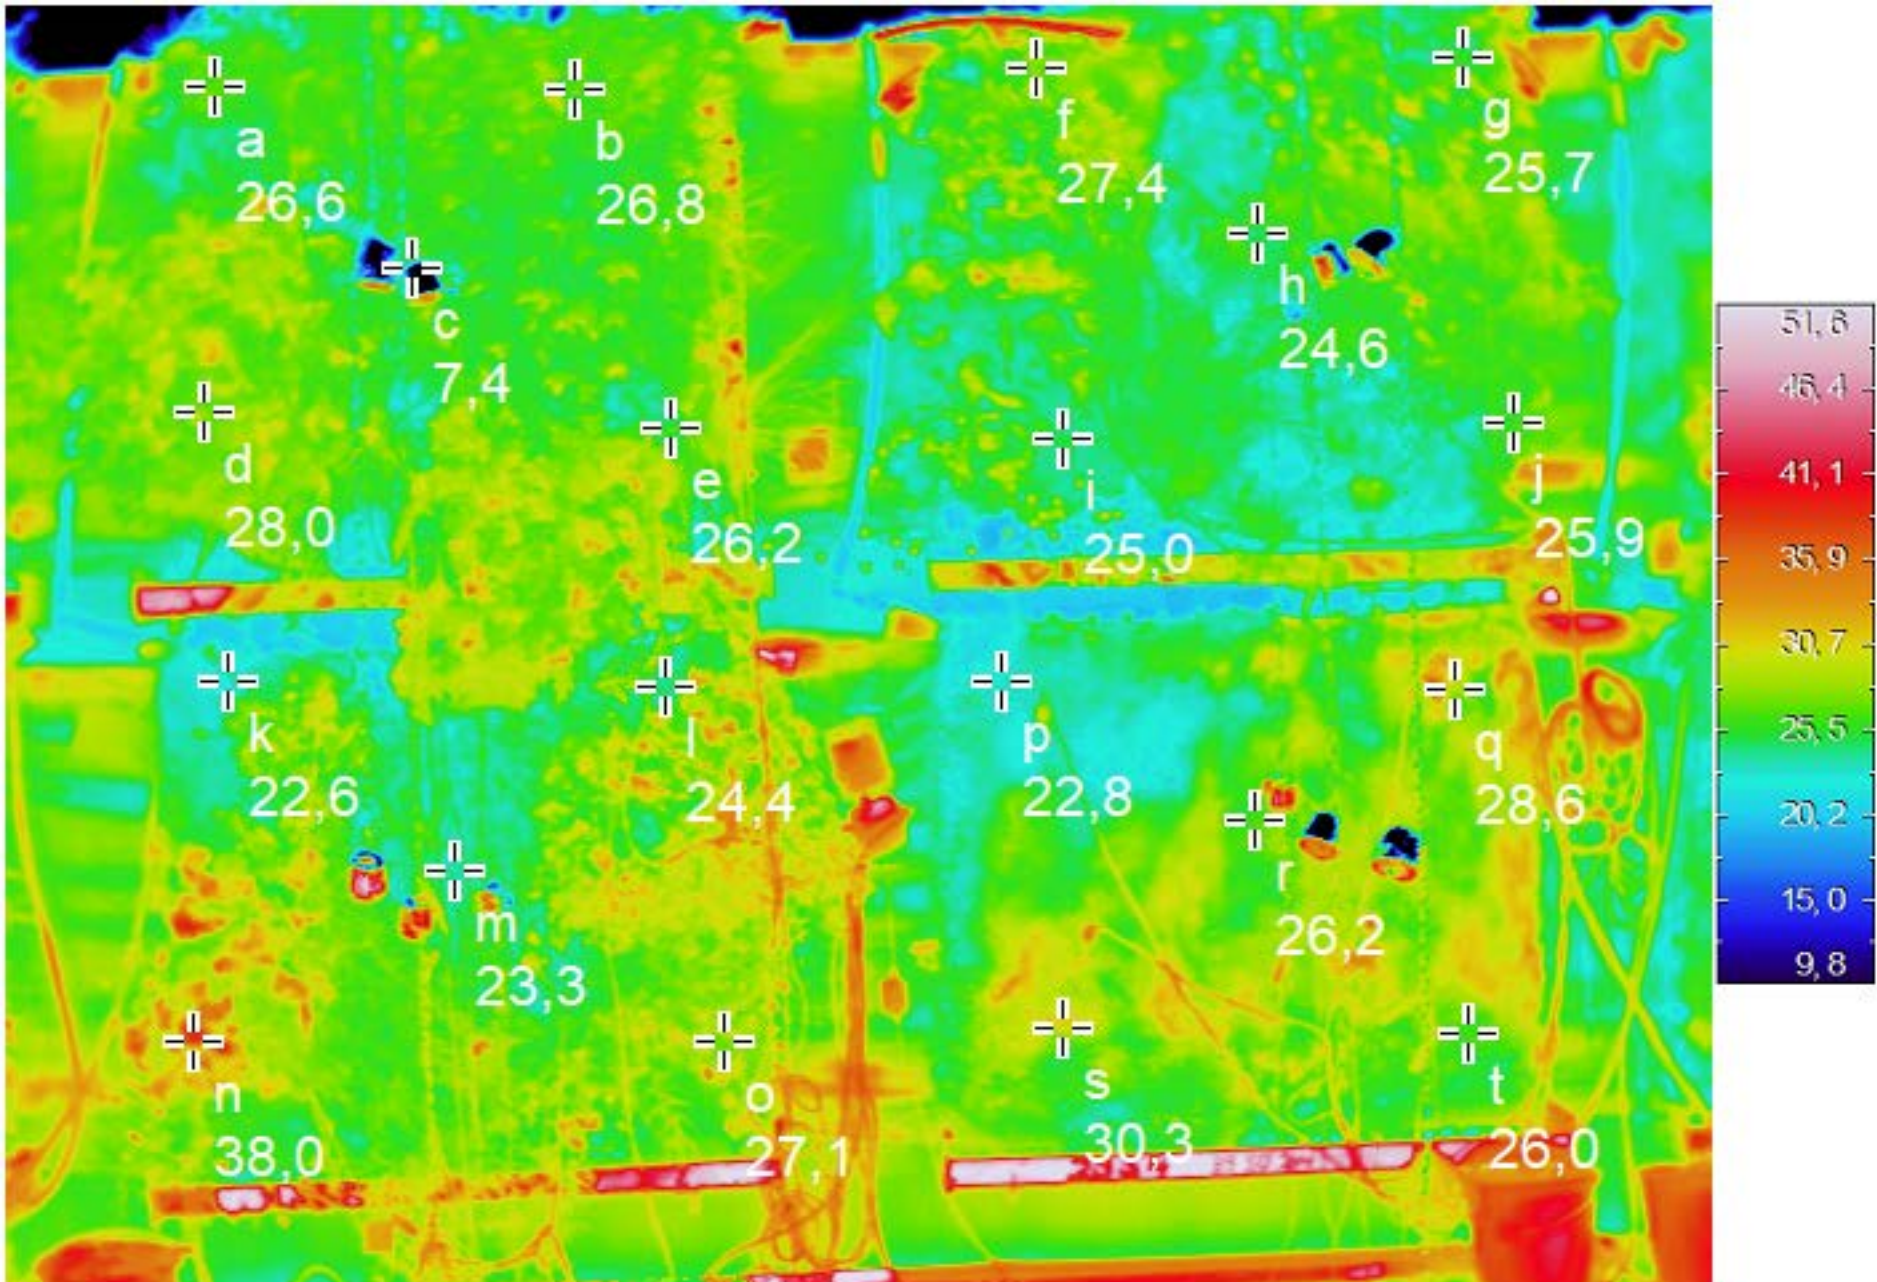

DateinameT02019IR.JPG  
Messtag:2019/06/18  
Messzeit:11:59:12  
Kommentar:  
Kameramodell:R500P  
Range:1[-20,0C-60,0C]  
BildmodusMEDx1,00  
Externes Objektiv:Standard  
Emissionsgrad:1.00  
Ambient Temp: 24,9IC  
IR Bildx1,00



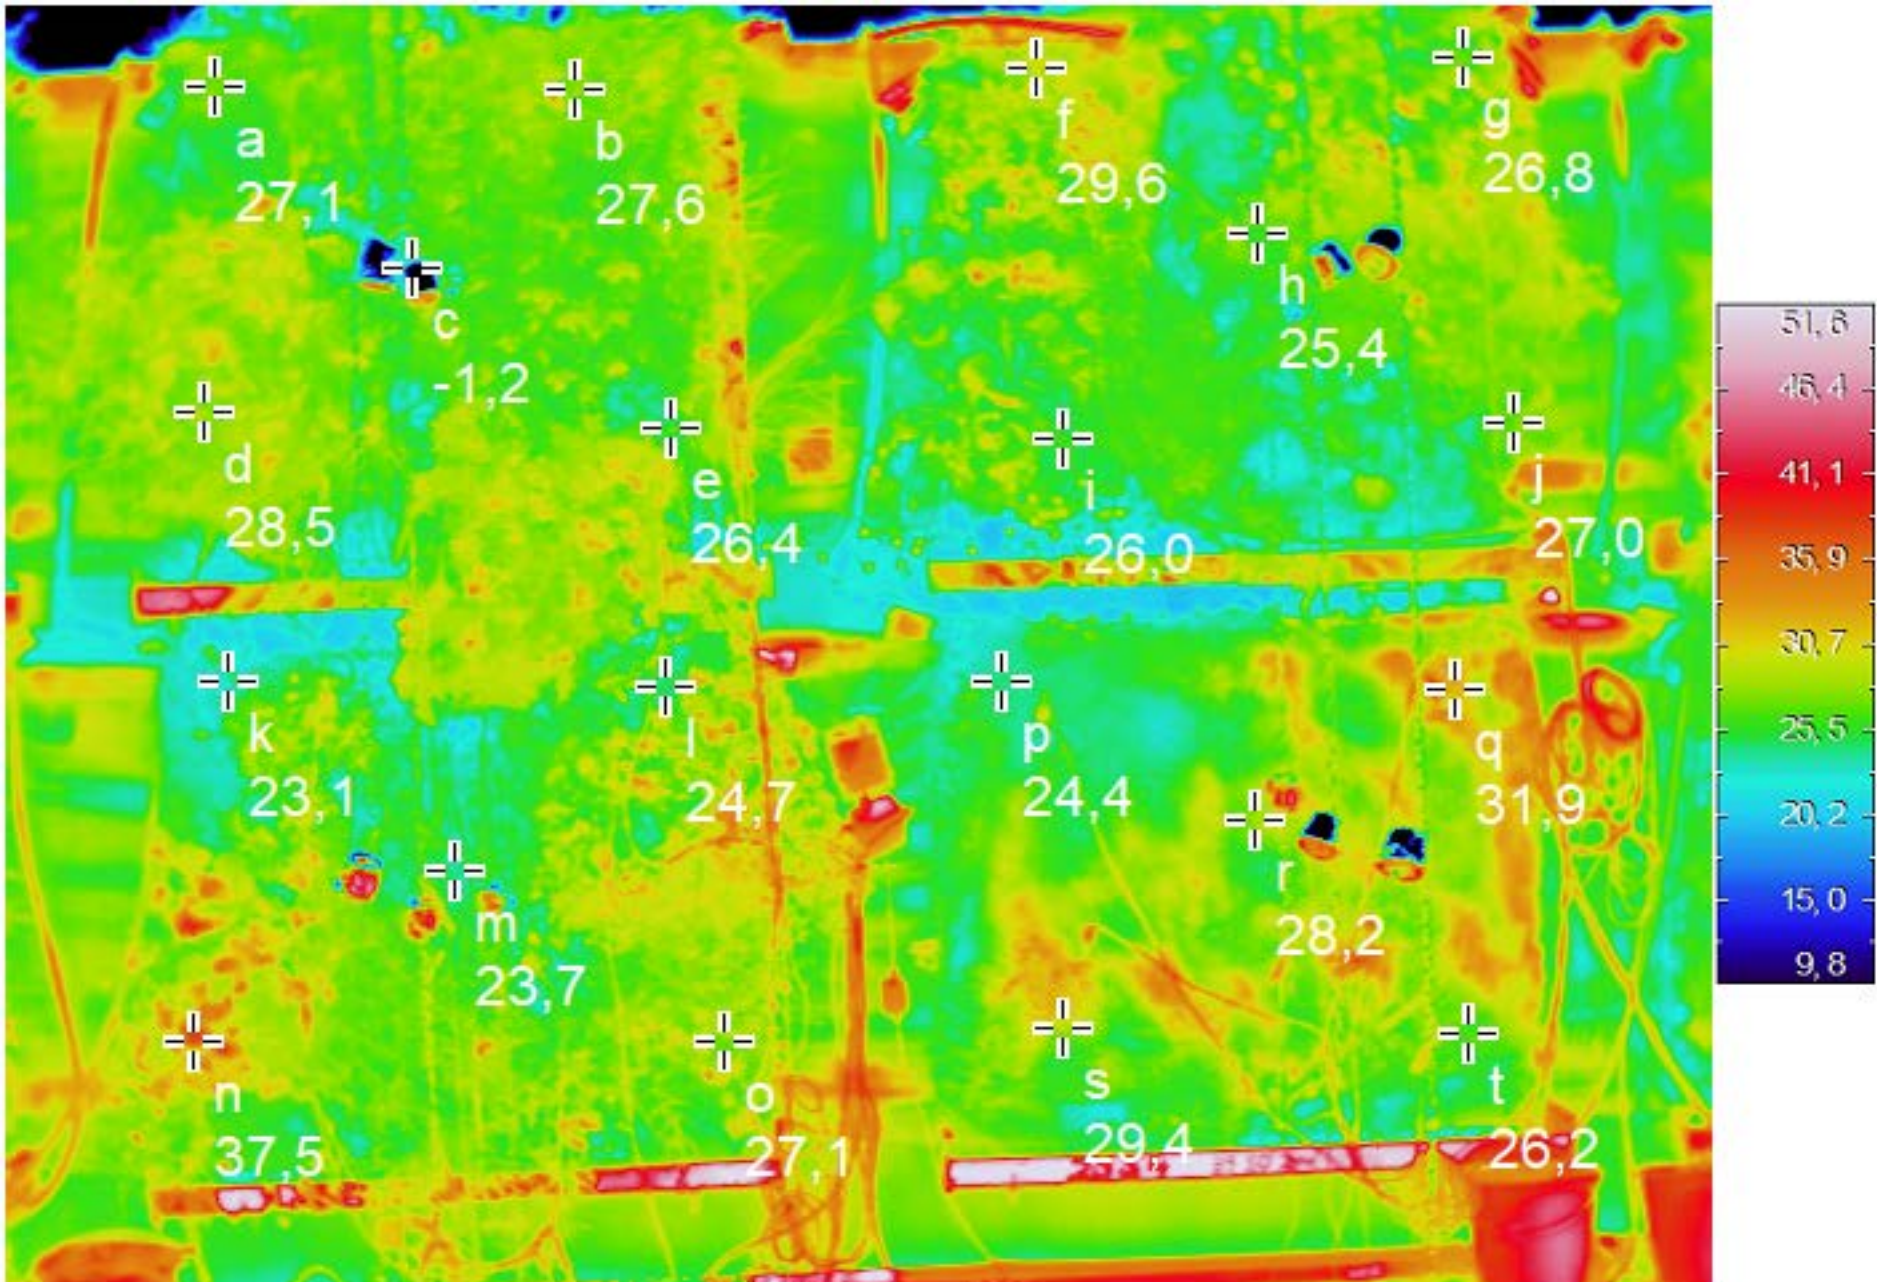

DateinameT02020IR.JPG  
Messtag:2019/06/18  
Messzeit:12:03:12  
Kommentar:  
Kameramodell:R500P  
Range:1(-20,0C-60,0C)  
BildmodusMEDx1,00  
Externes Objektiv:Standard  
Emissionsgrad:1.00  
Ambient Temp: 24,9IC  
IR Bildx1,00



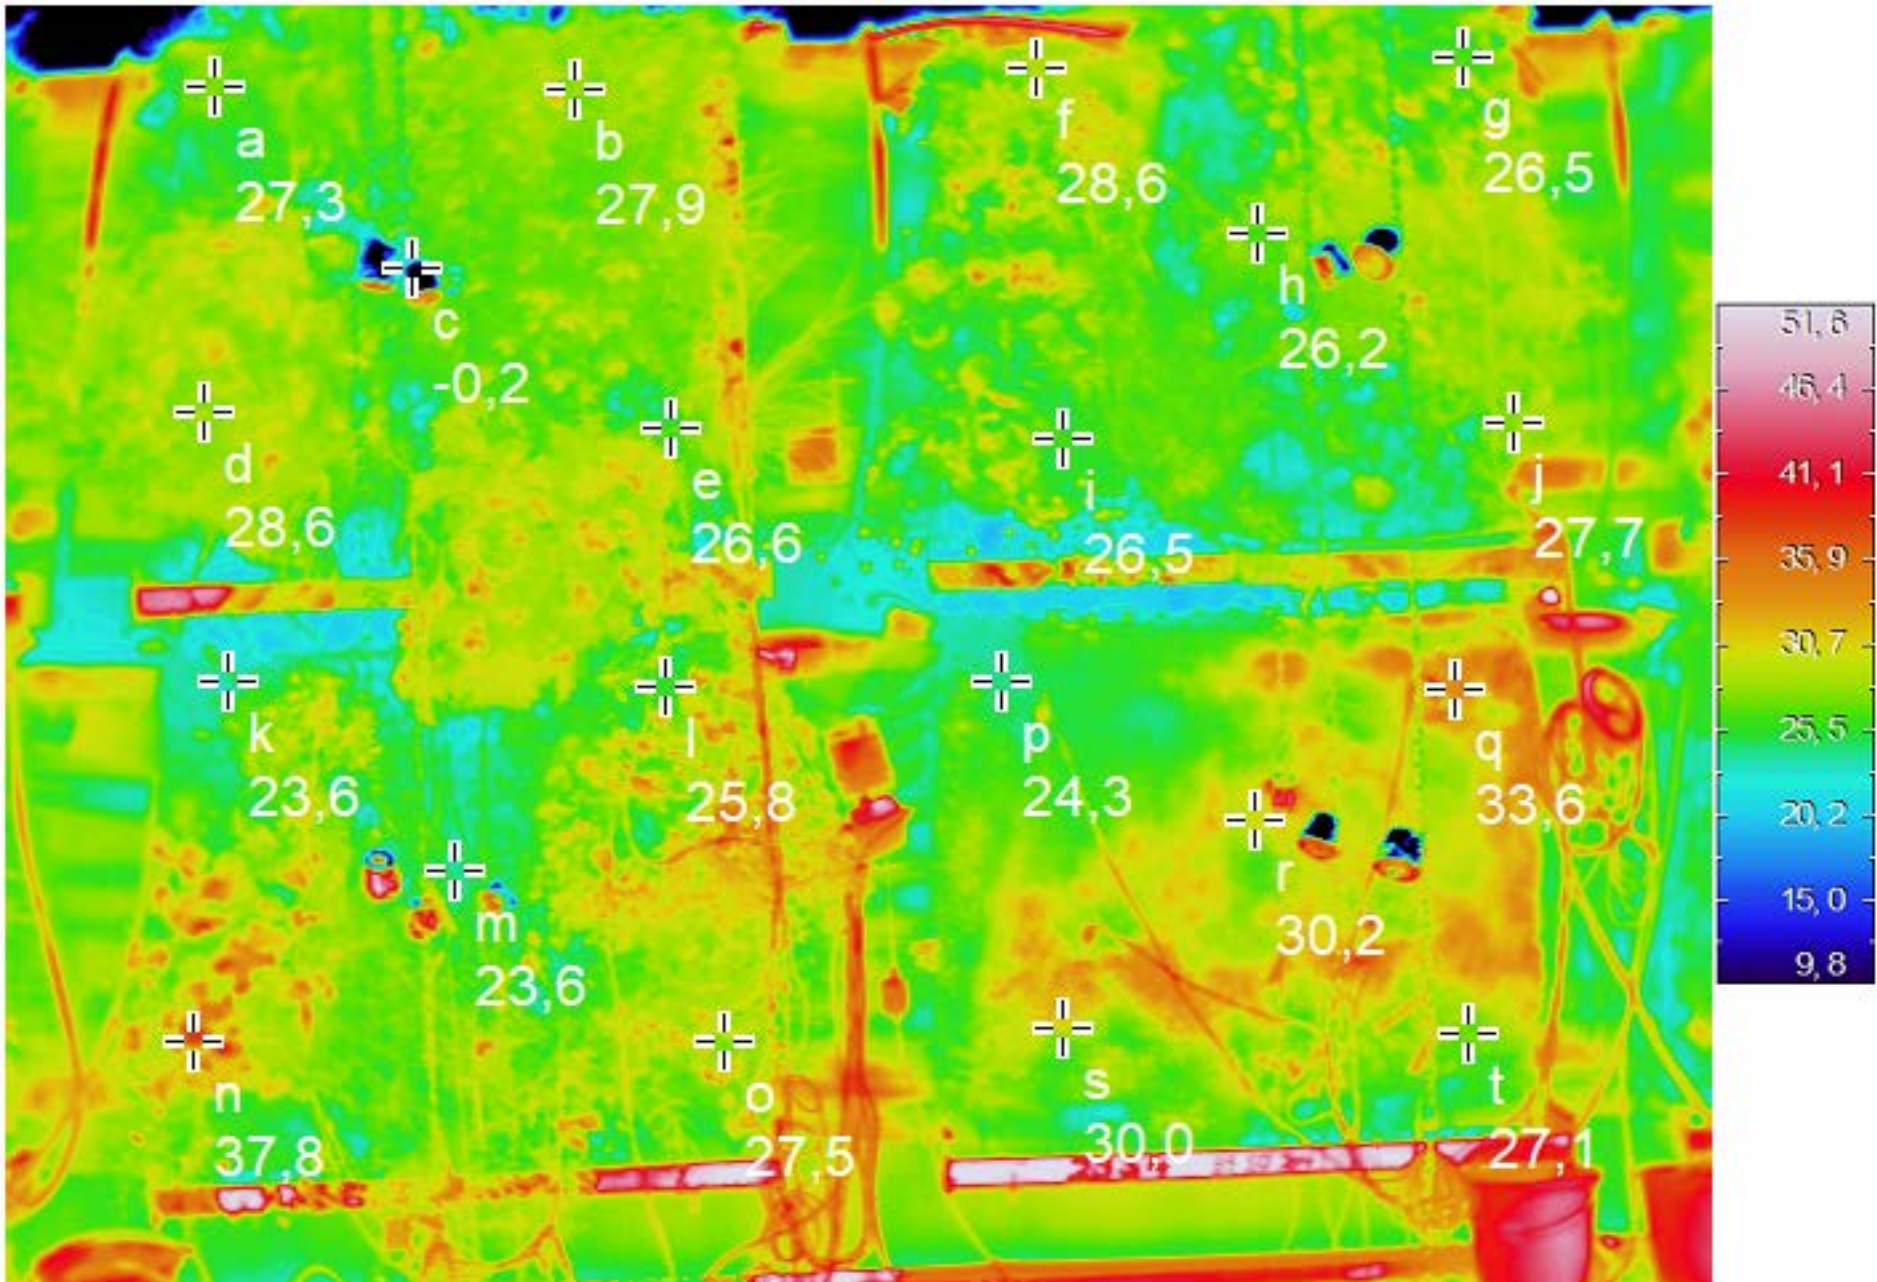

DateinameT02021IR.JPG  
Messtag:2019/06/18  
Messzeit:12:07:12  
Kommentar:  
Kameramodell:R500P  
Range:1[-20,0C-60,0C]  
BildmodusMEDx1,00  
Externes Objektiv:Standard  
Emissionsgrad:1.00  
Ambient Temp: 24,9IC  
IR Bildx1,00



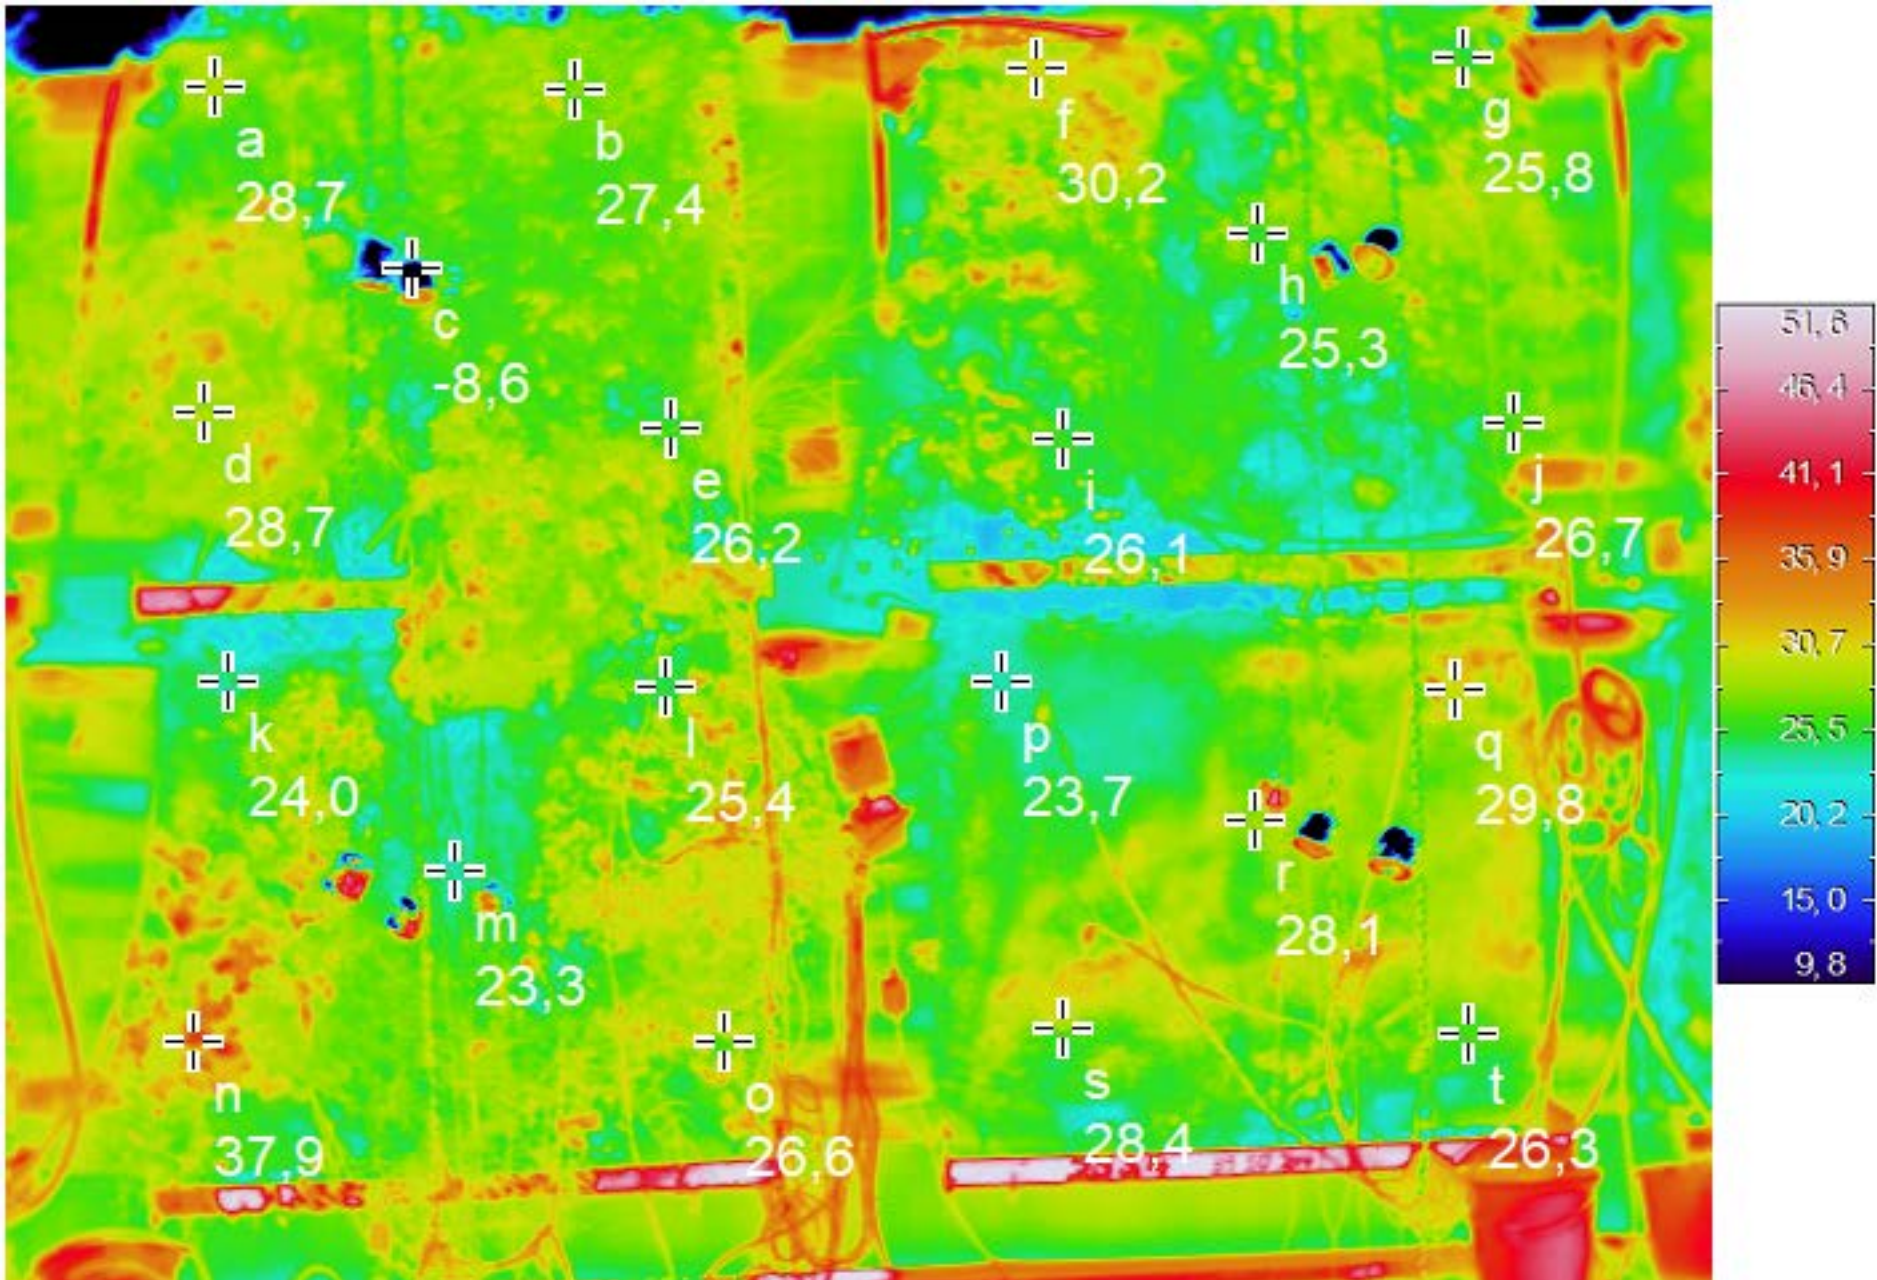

DateinameT02022IR.JPG  
Messtag:2019/06/18  
Messzeit:12:11:12  
Kommentar:  
Kameramodell:R500P  
Range:1[-20,0C-60,0C]  
BildmodusMEDx1,00  
Externes Objektiv:Standard  
Emissionsgrad:1.00  
Ambient Temp: 24,9IC  
IR Bildx1,00



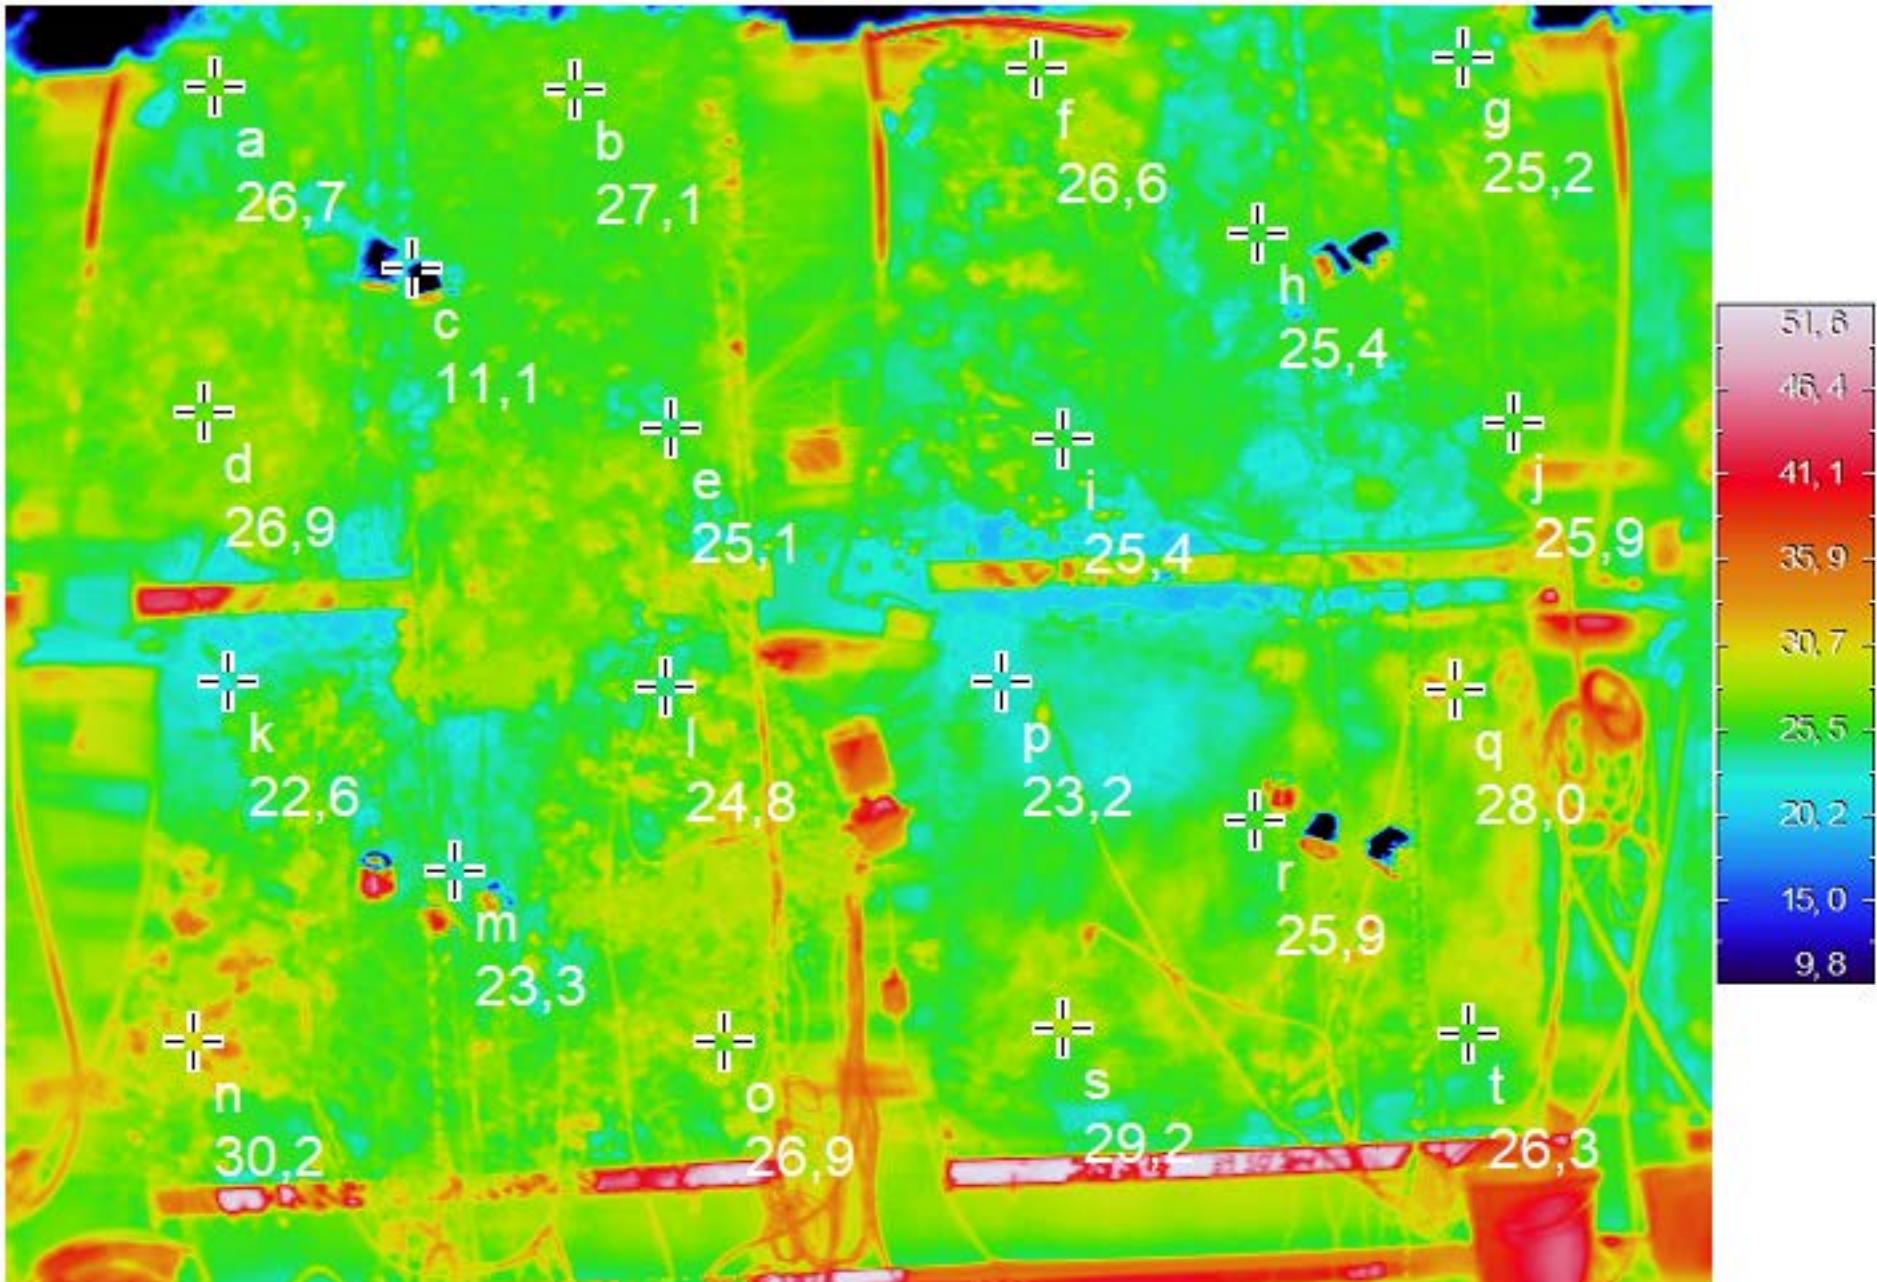

DateinameT02023IR.JPG  
Messtag:2019/06/18  
Messzeit:12:15:12  
Kommentar:  
Kameramodell:R500P  
Range:1[-20,0C-60,0C]  
BildmodusMEDx1,00  
Externes Objektiv:Standard  
Emissionsgrad:1.00  
Ambient Temp: 24,9IC  
IR Bildx1,00



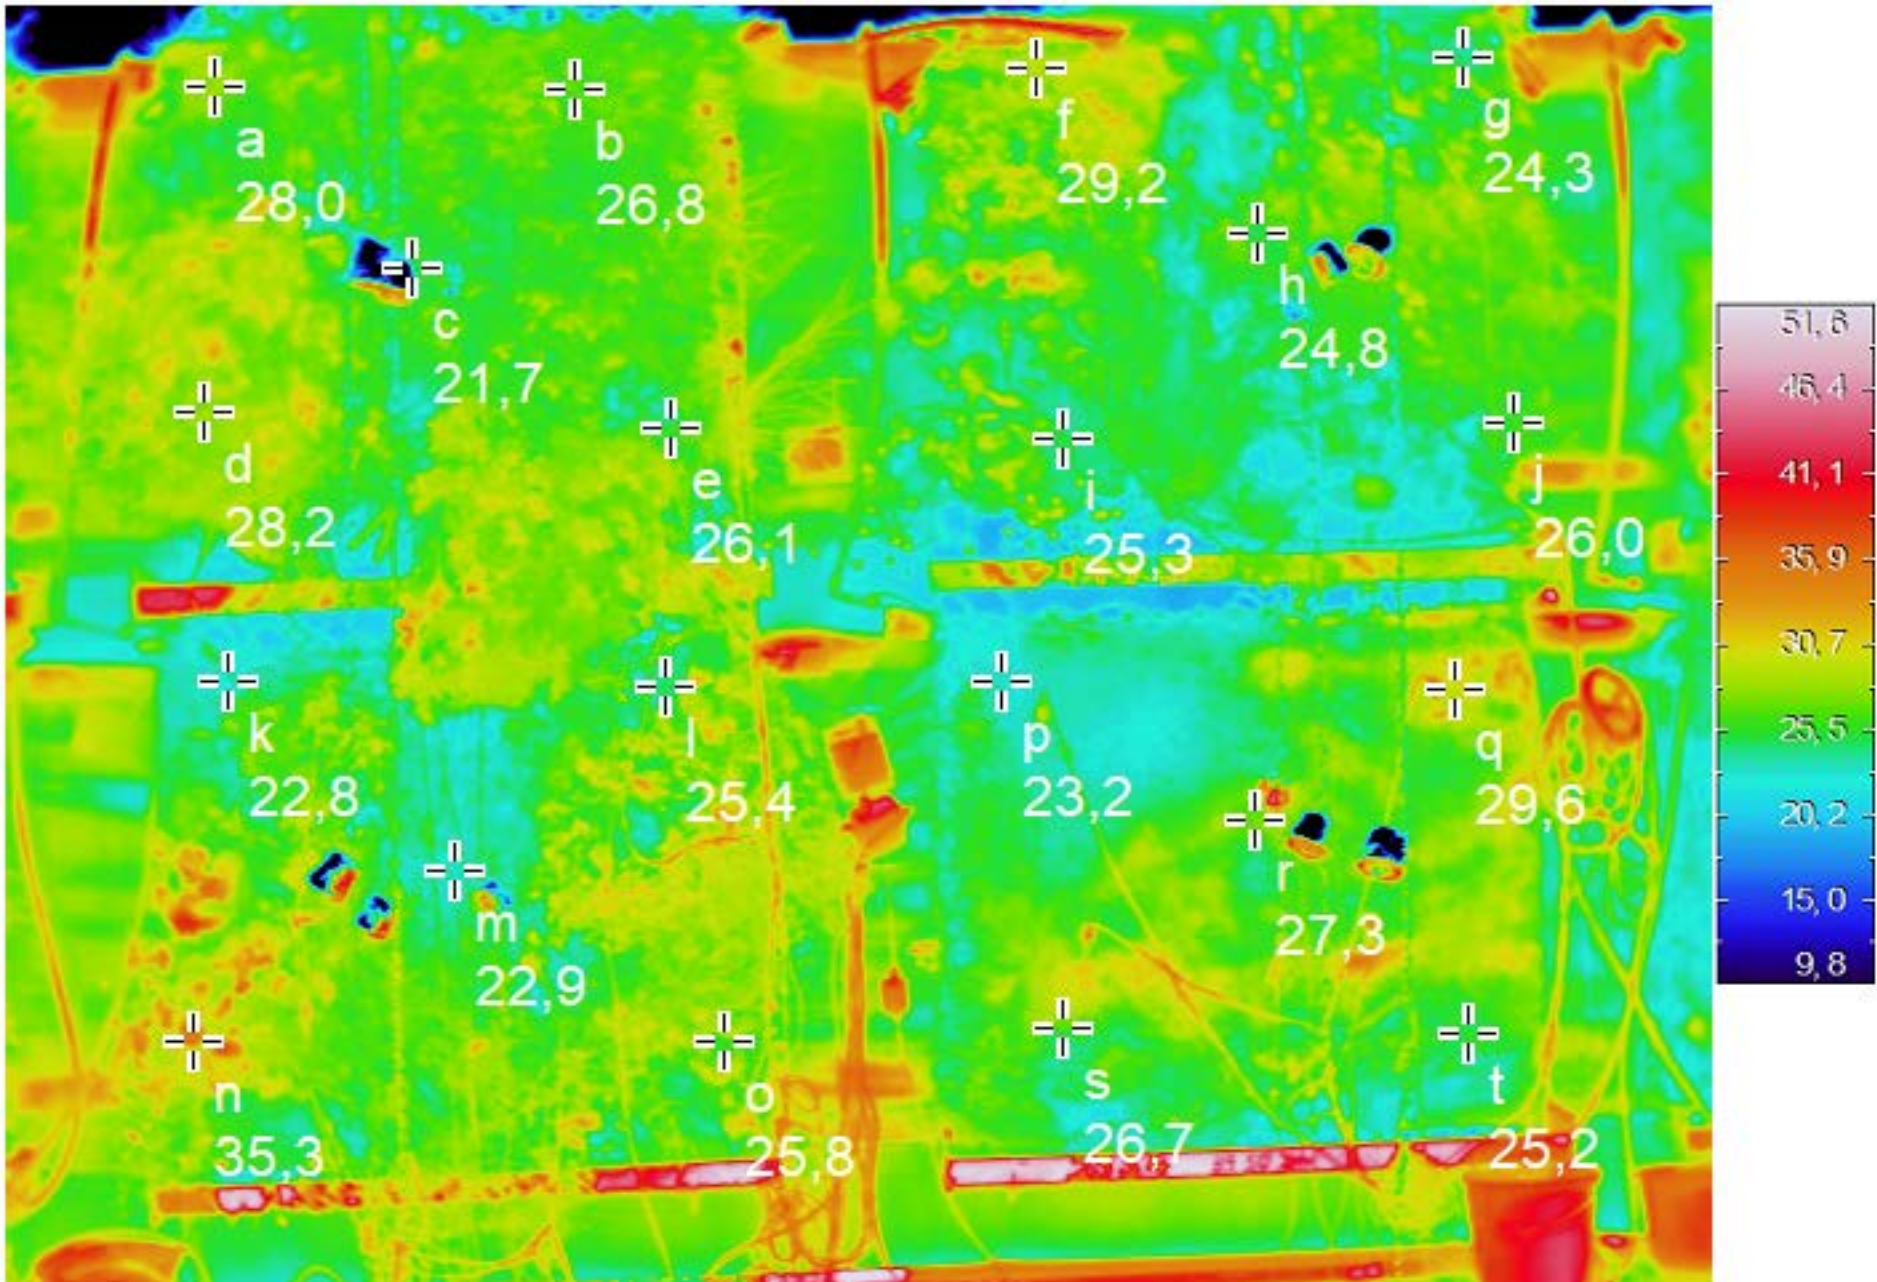

DateinameT02024IR.JPG  
Messtag:2019/06/18  
Messzeit:12:19:13  
Kommentar:  
Kameramodell:R500P  
Range:1[-20,0C-60,0C]  
BildmodusMEDx1,00  
Externes Objektiv:Standard  
Emissionsgrad:1.00  
Ambient Temp: 24,9IC  
IR Bildx1,00



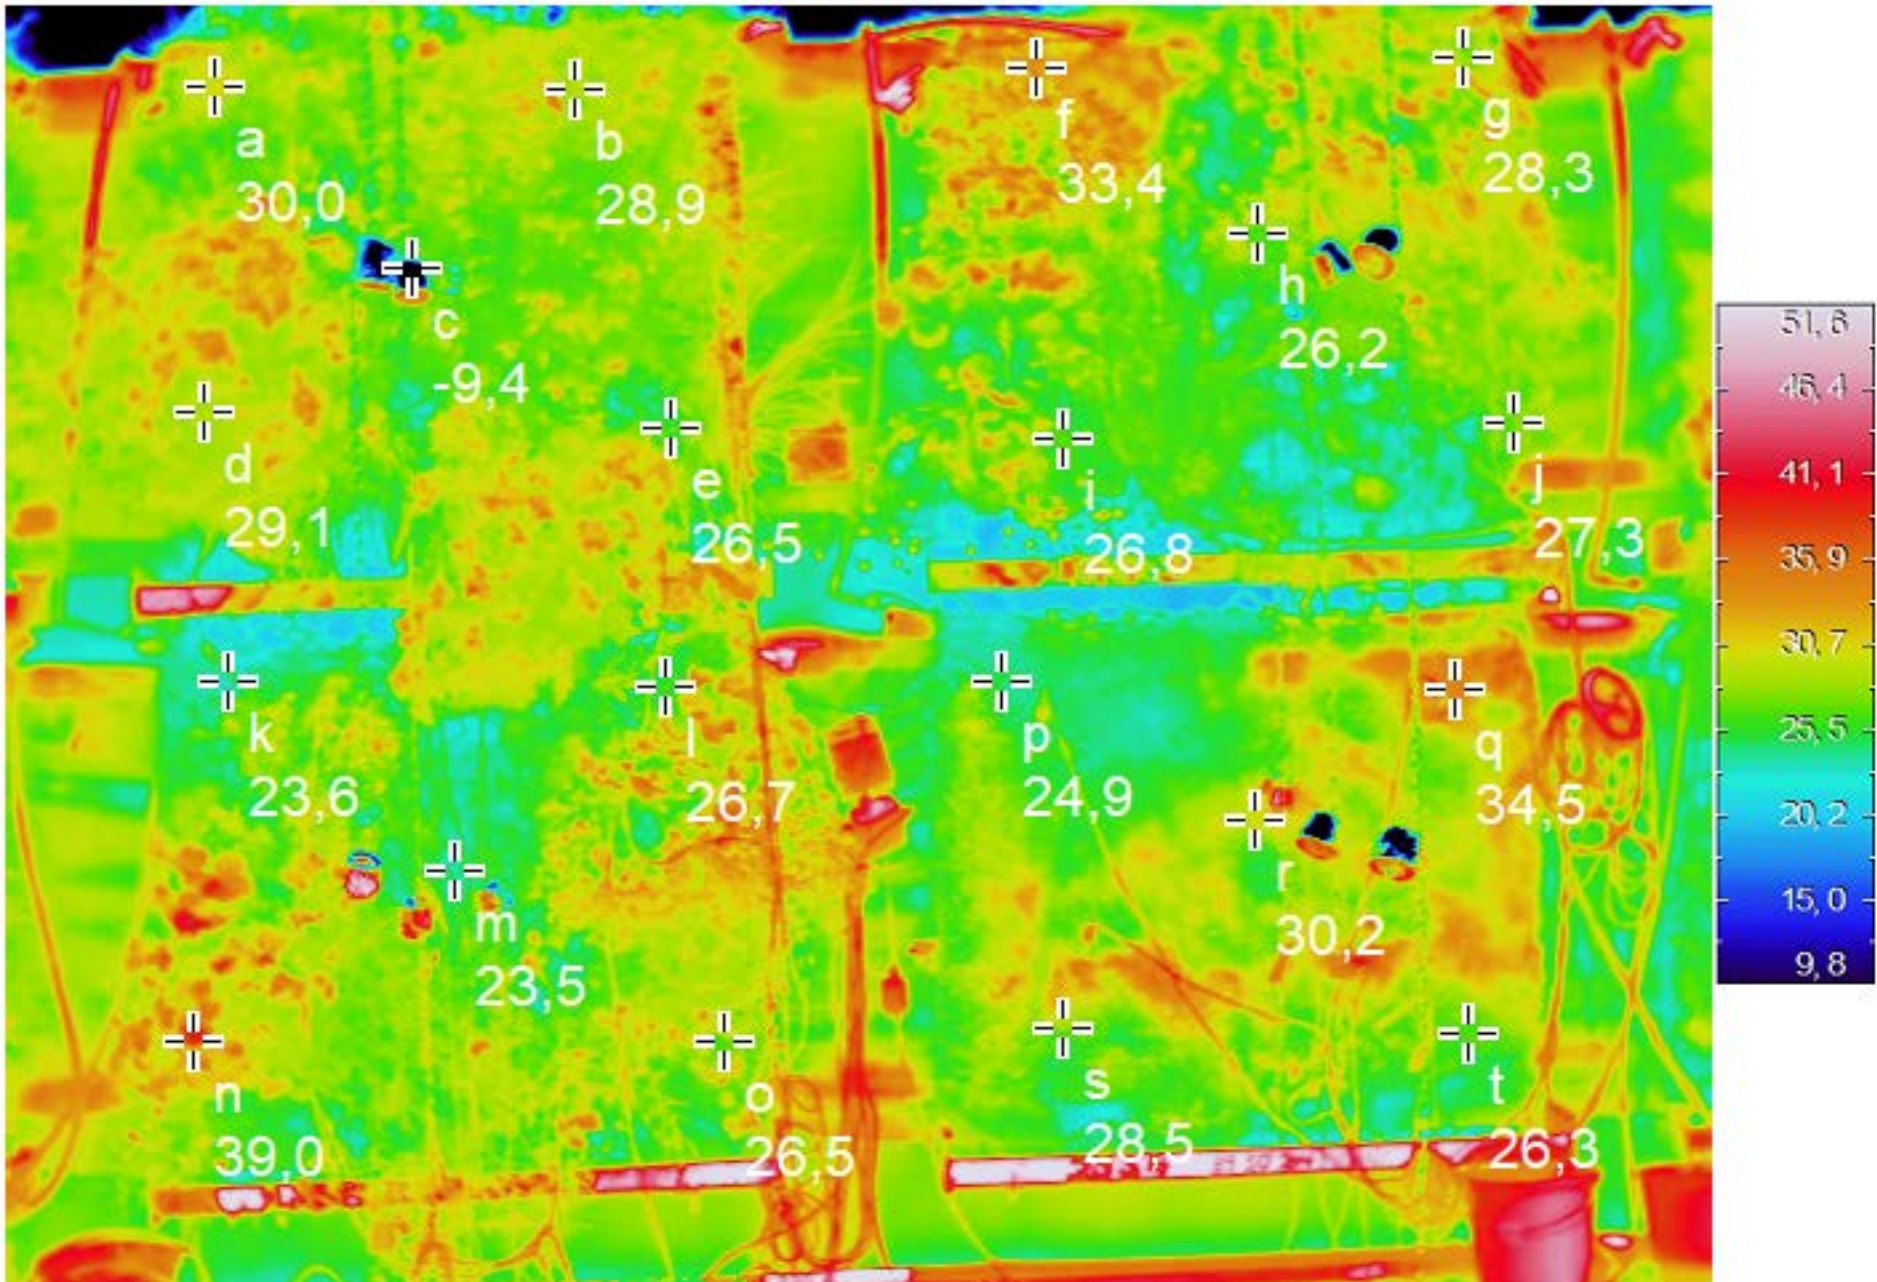

DateinameT02025IR.JPG  
Messtag:2019/06/18  
Messzeit:12:23:12  
Kommentar:  
Kameramodell:R500P  
Range:1[-20,0C-60,0C]  
BildmodusMEDx1,00  
Externes Objektiv:Standard  
Emissionsgrad:1.00  
Ambient Temp: 24,9IC  
IR Bildx1,00



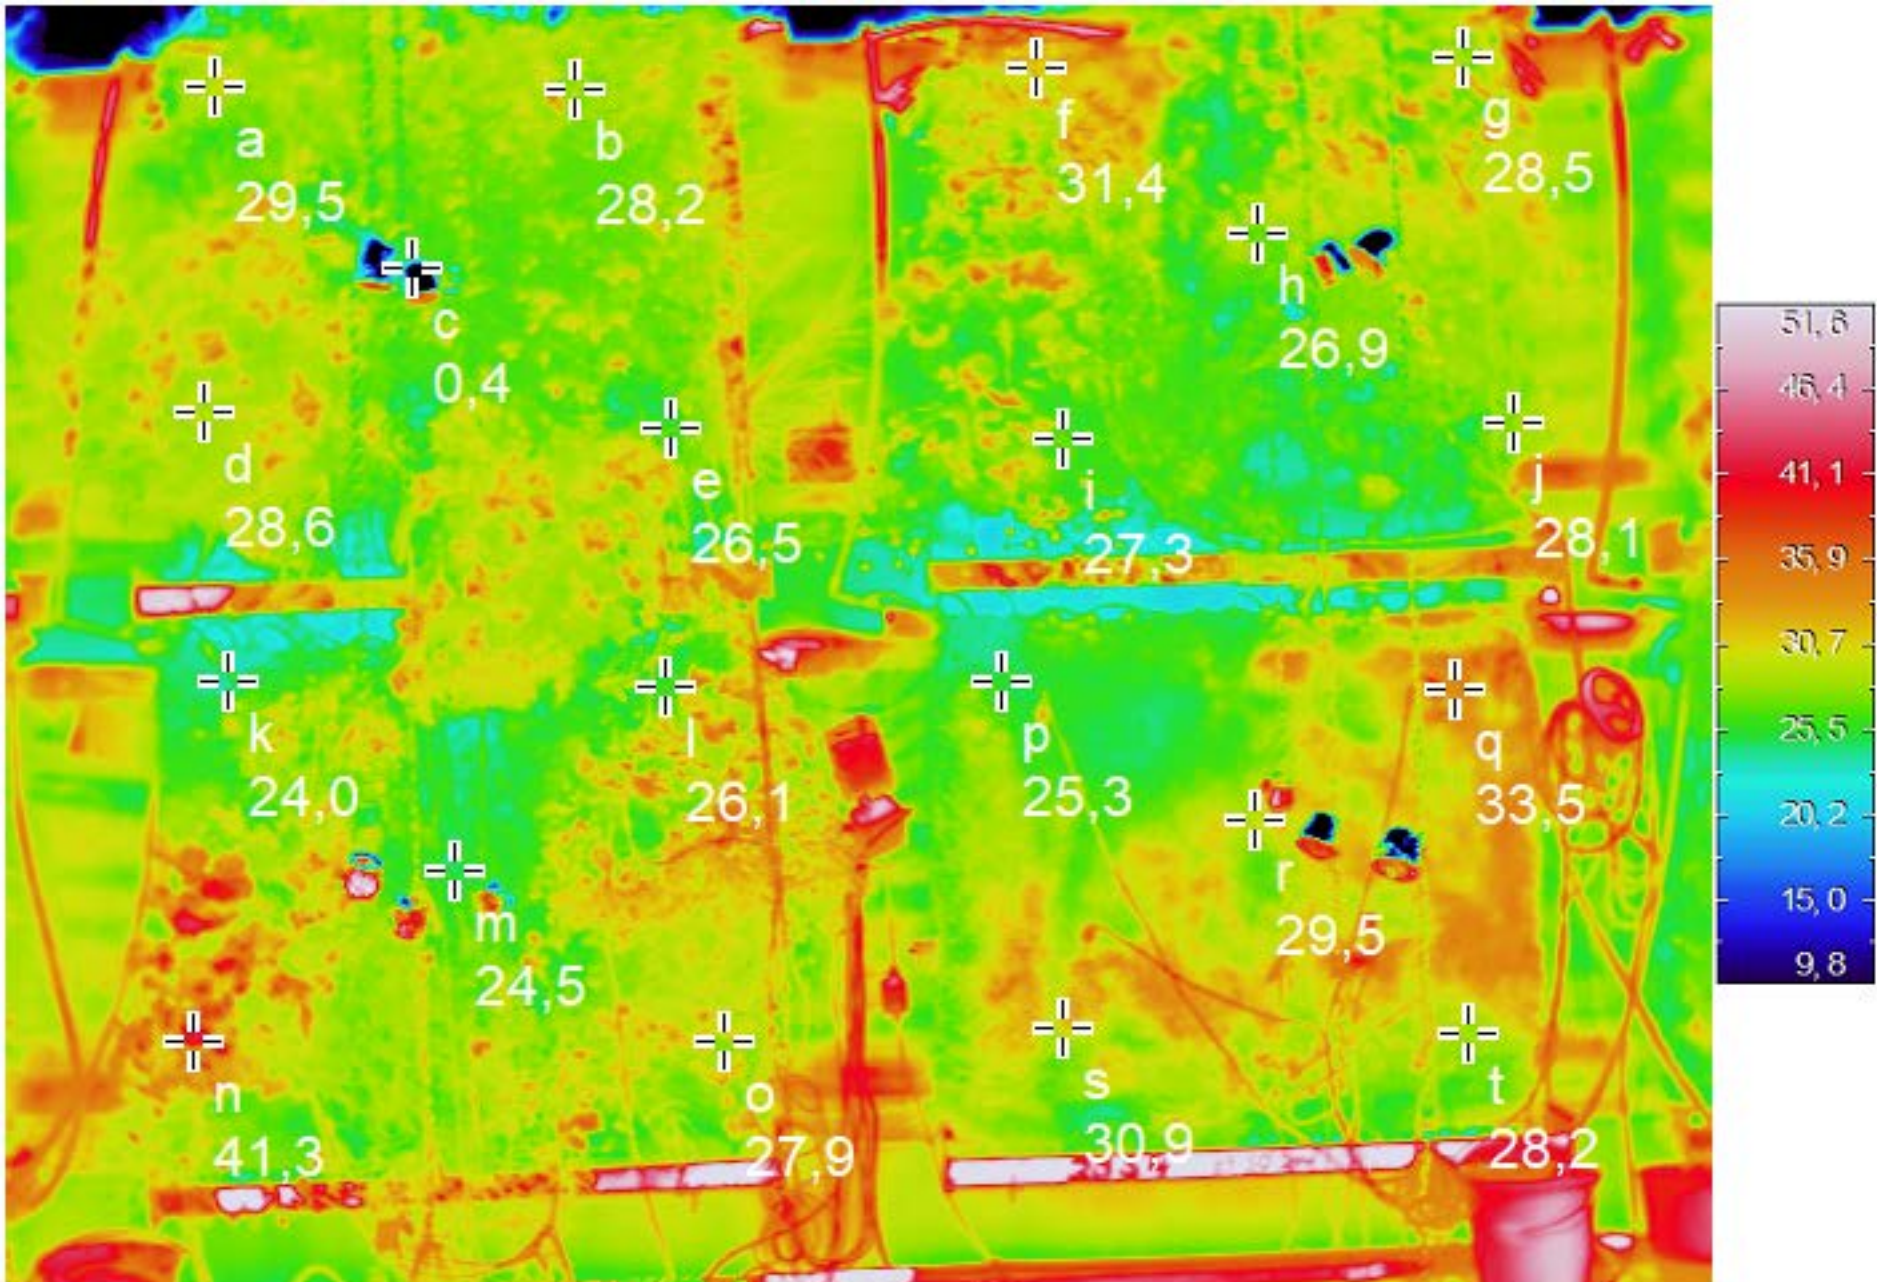

DateinameT02026IR.JPG  
Messtag:2019/06/18  
Messzeit:12:27:12  
Kommentar:  
Kameramodell:R500P  
Range:1[-20,0C-60,0C]  
BildmodusMEDx1,00  
Externes Objektiv:Standard  
Emissionsgrad:1.00  
Ambient Temp: 24,9IC  
IR Bildx1,00



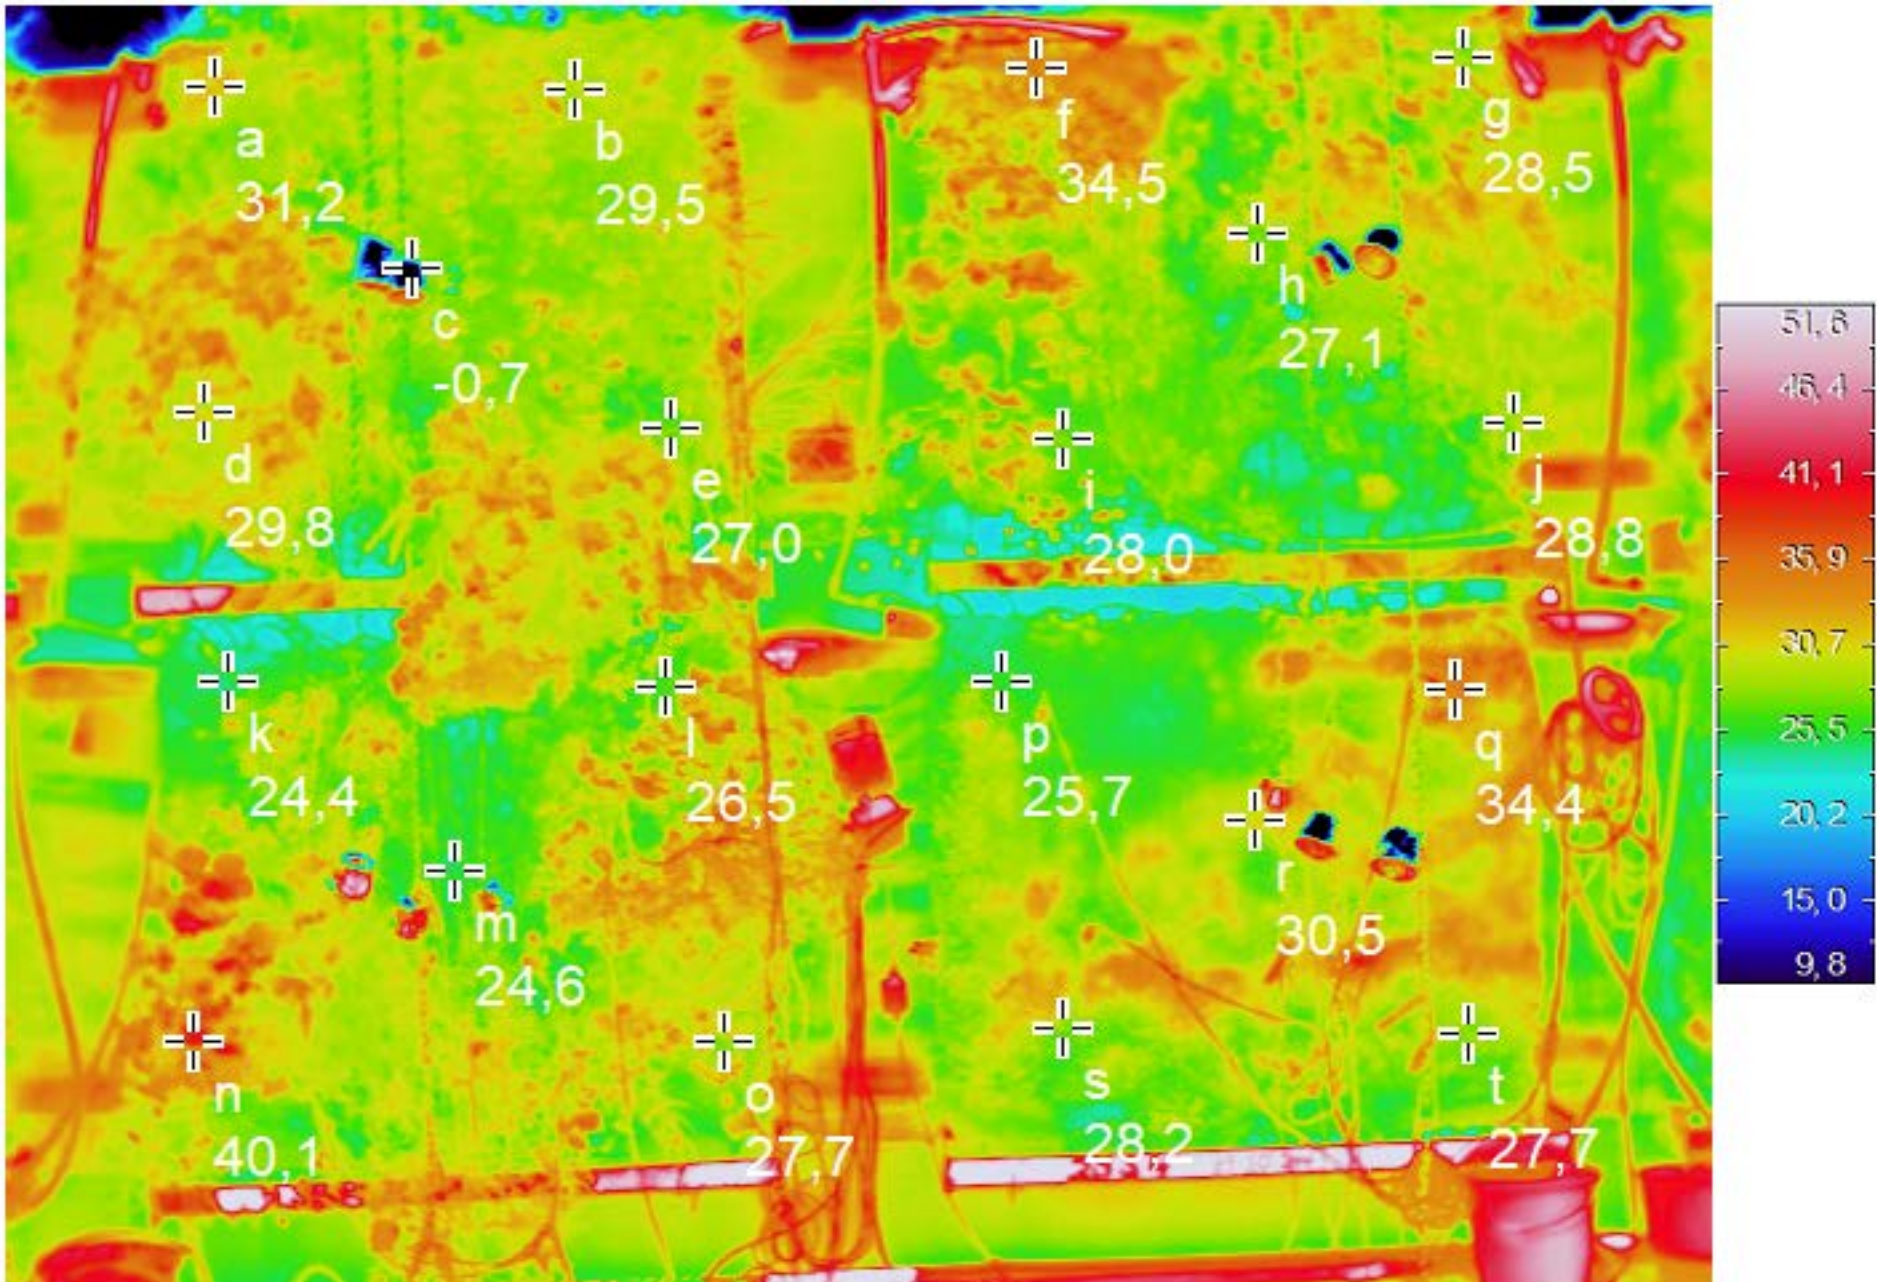

DateinameT02027IR.JPG  
Messtag:2019/06/18  
Messzeit:12:31:12  
Kommentar:  
Kameramodell:R500P  
Range:1[-20,0C-60,0C]  
BildmodusMEDx1,00  
Externes Objektiv:Standard  
Emissionsgrad:1.00  
Ambient Temp: 24,9IC  
IR Bildx1,00



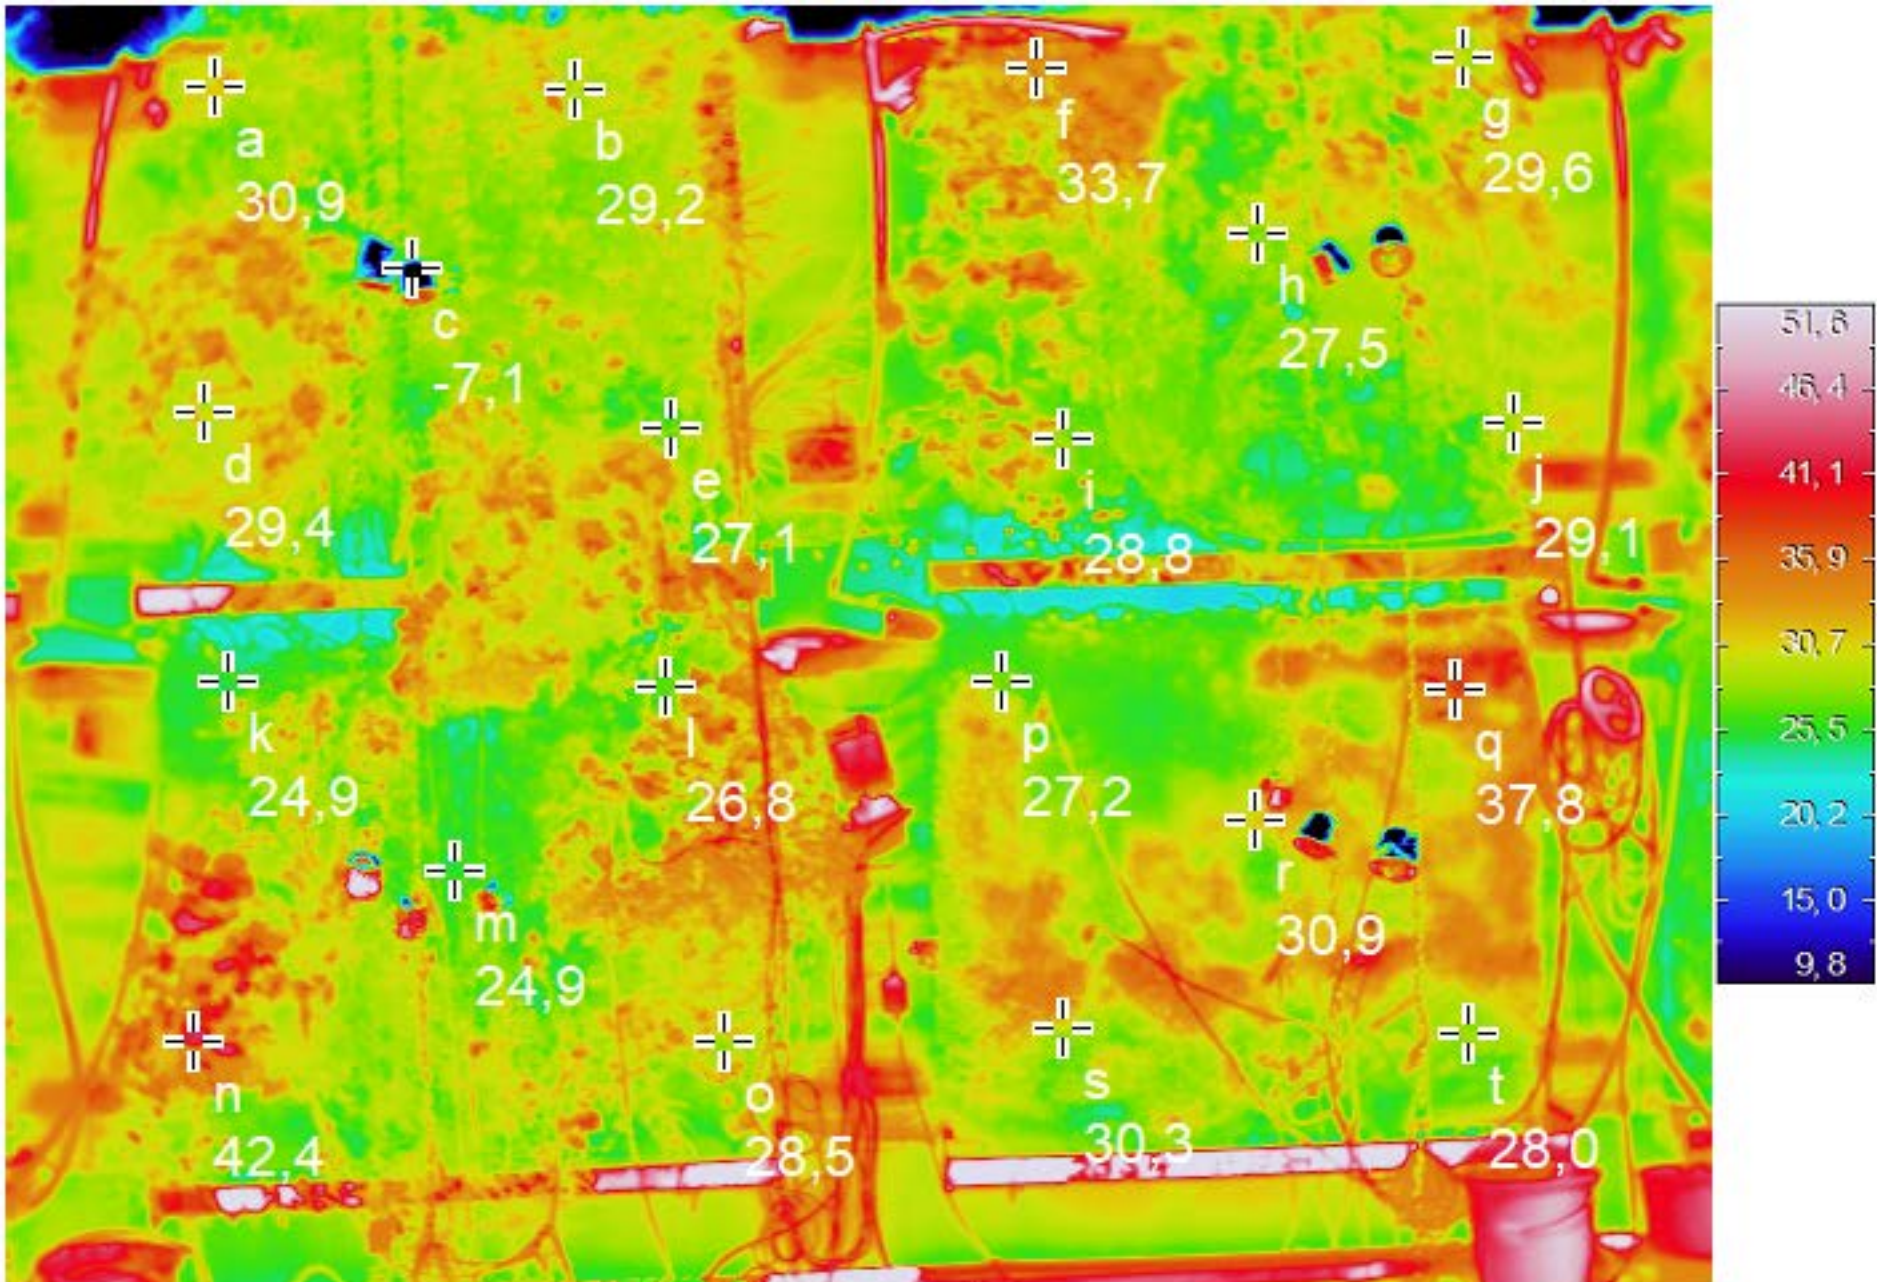

DateinameT02028IR.JPG  
Messtag:2019/06/18  
Messzeit:12:35:12  
Kommentar:  
Kameramodell:R500P  
Range:1[-20,0C-60,0C]  
BildmodusMEDx1,00  
Externes Objektiv:Standard  
Emissionsgrad:1.00  
Ambient Temp: 24,9IC  
IR Bildx1,00



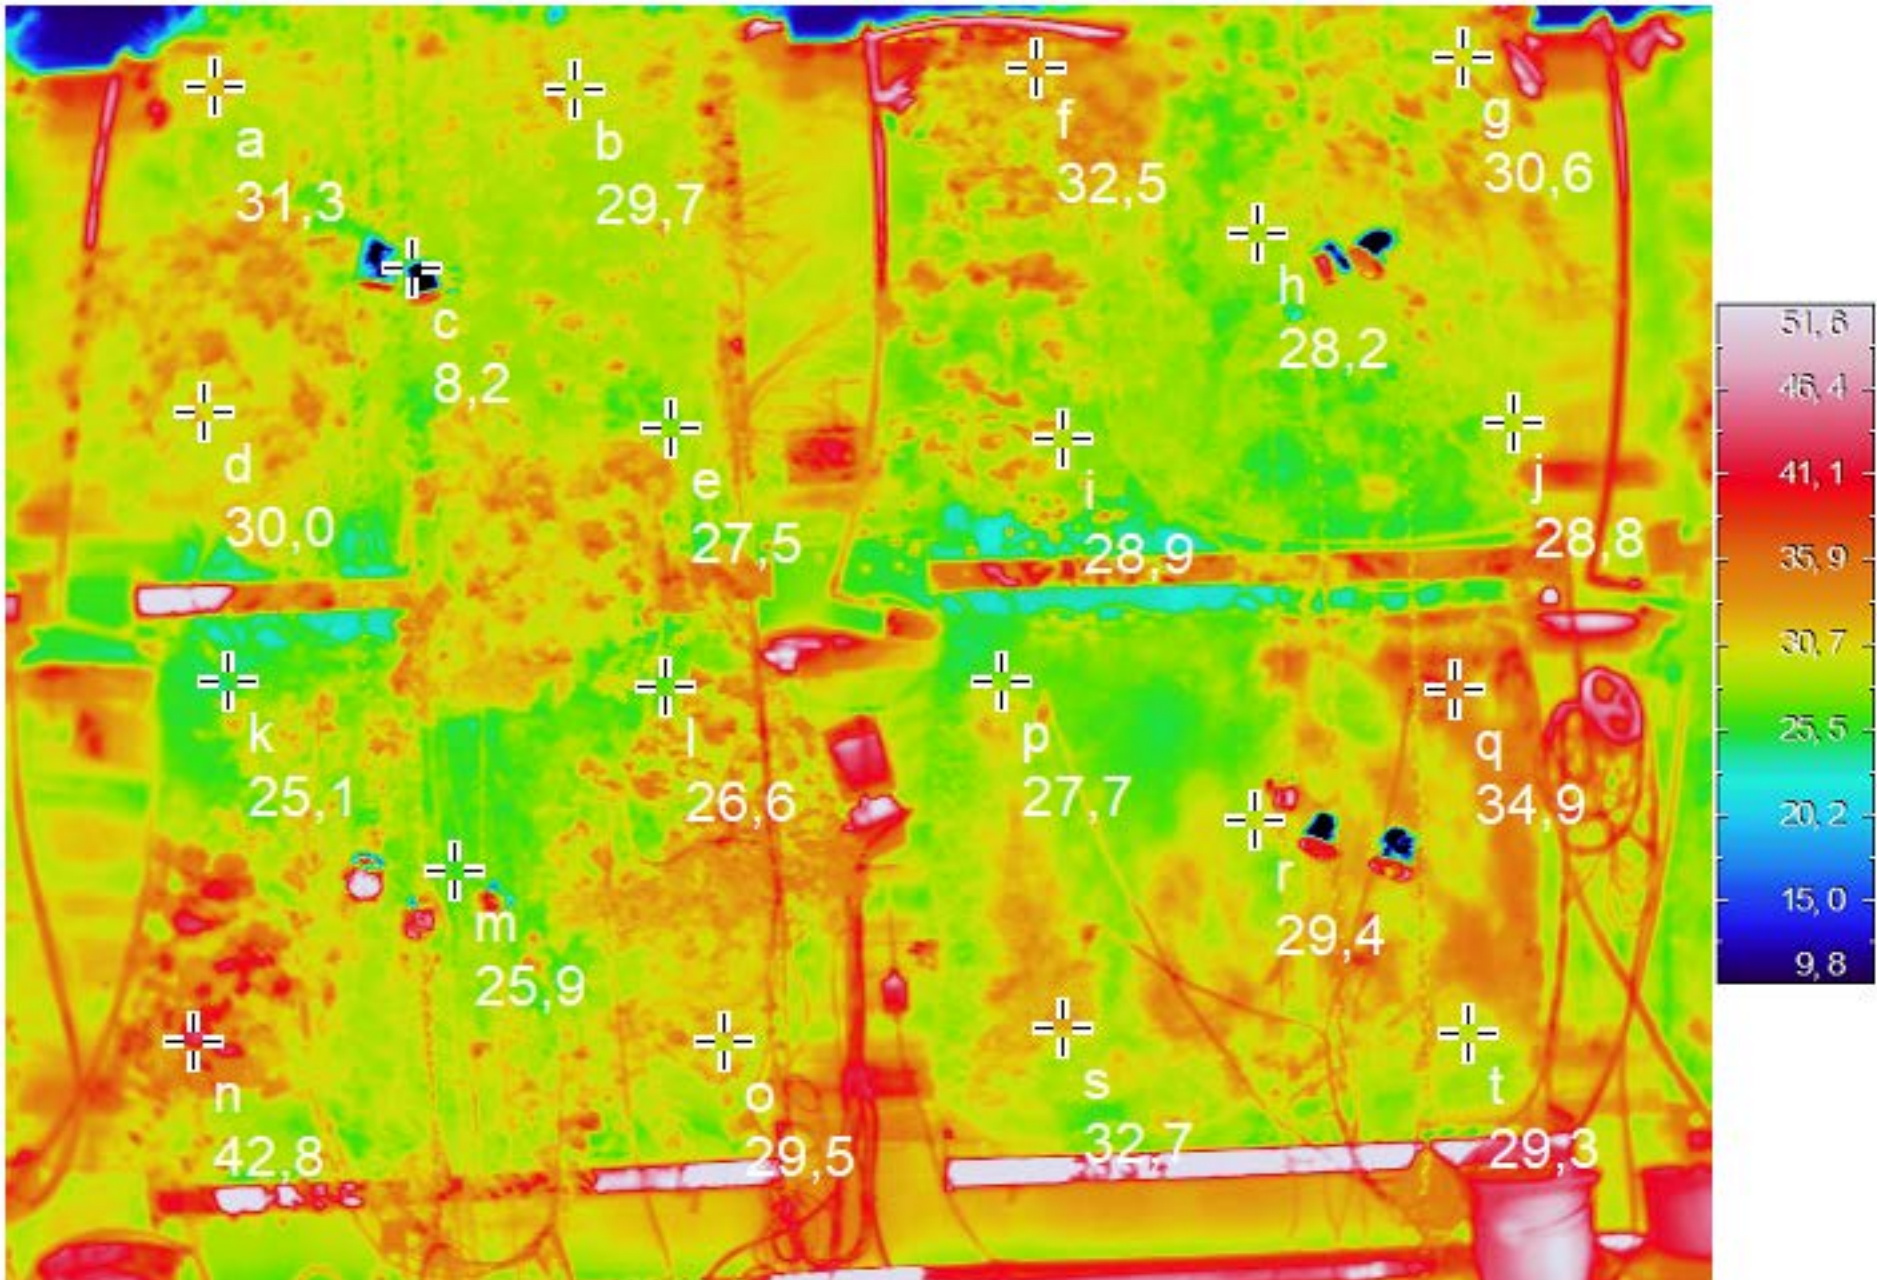

DateinameT02029IR.JPG  
Messtag:2019/06/18  
Messzeit:12:39:12  
Kommentar:  
Kameramodell:R500P  
Range:1[-20,0C-60,0C]  
BildmodusMEDx1,00  
Externes Objektiv:Standard  
Emissionsgrad:1.00  
Ambient Temp: 24,9IC  
IR Bildx1,00



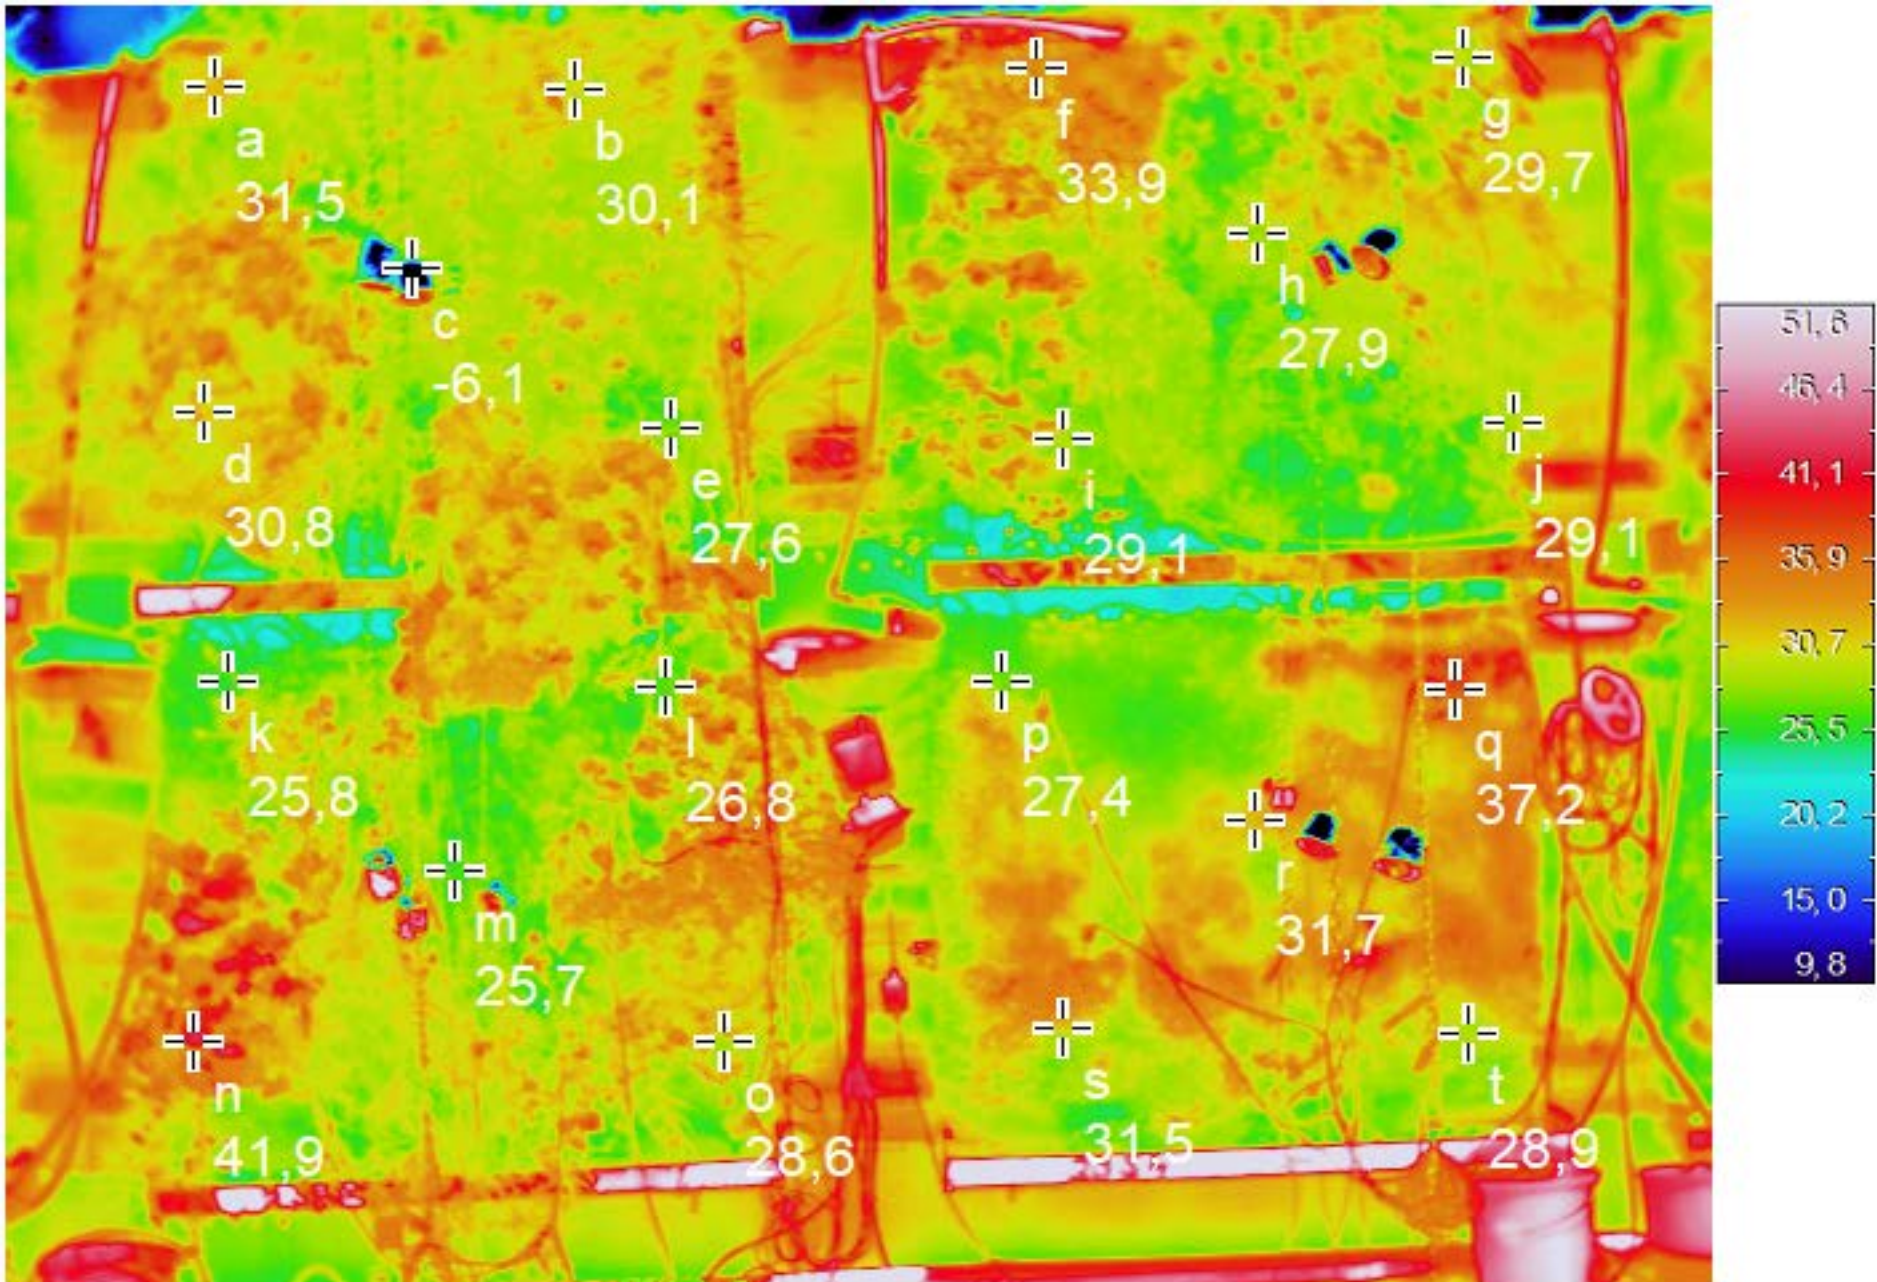

DateinameT02030IR.JPG  
Messtag:2019/06/18  
Messzeit:12:43:12  
Kommentar:  
Kameramodell:R500P  
Range:1[-20,0C-60,0C]  
BildmodusMEDx1,00  
Externes Objektiv:Standard  
Emissionsgrad:1.00  
Ambient Temp: 24,9IC  
IR Bildx1,00



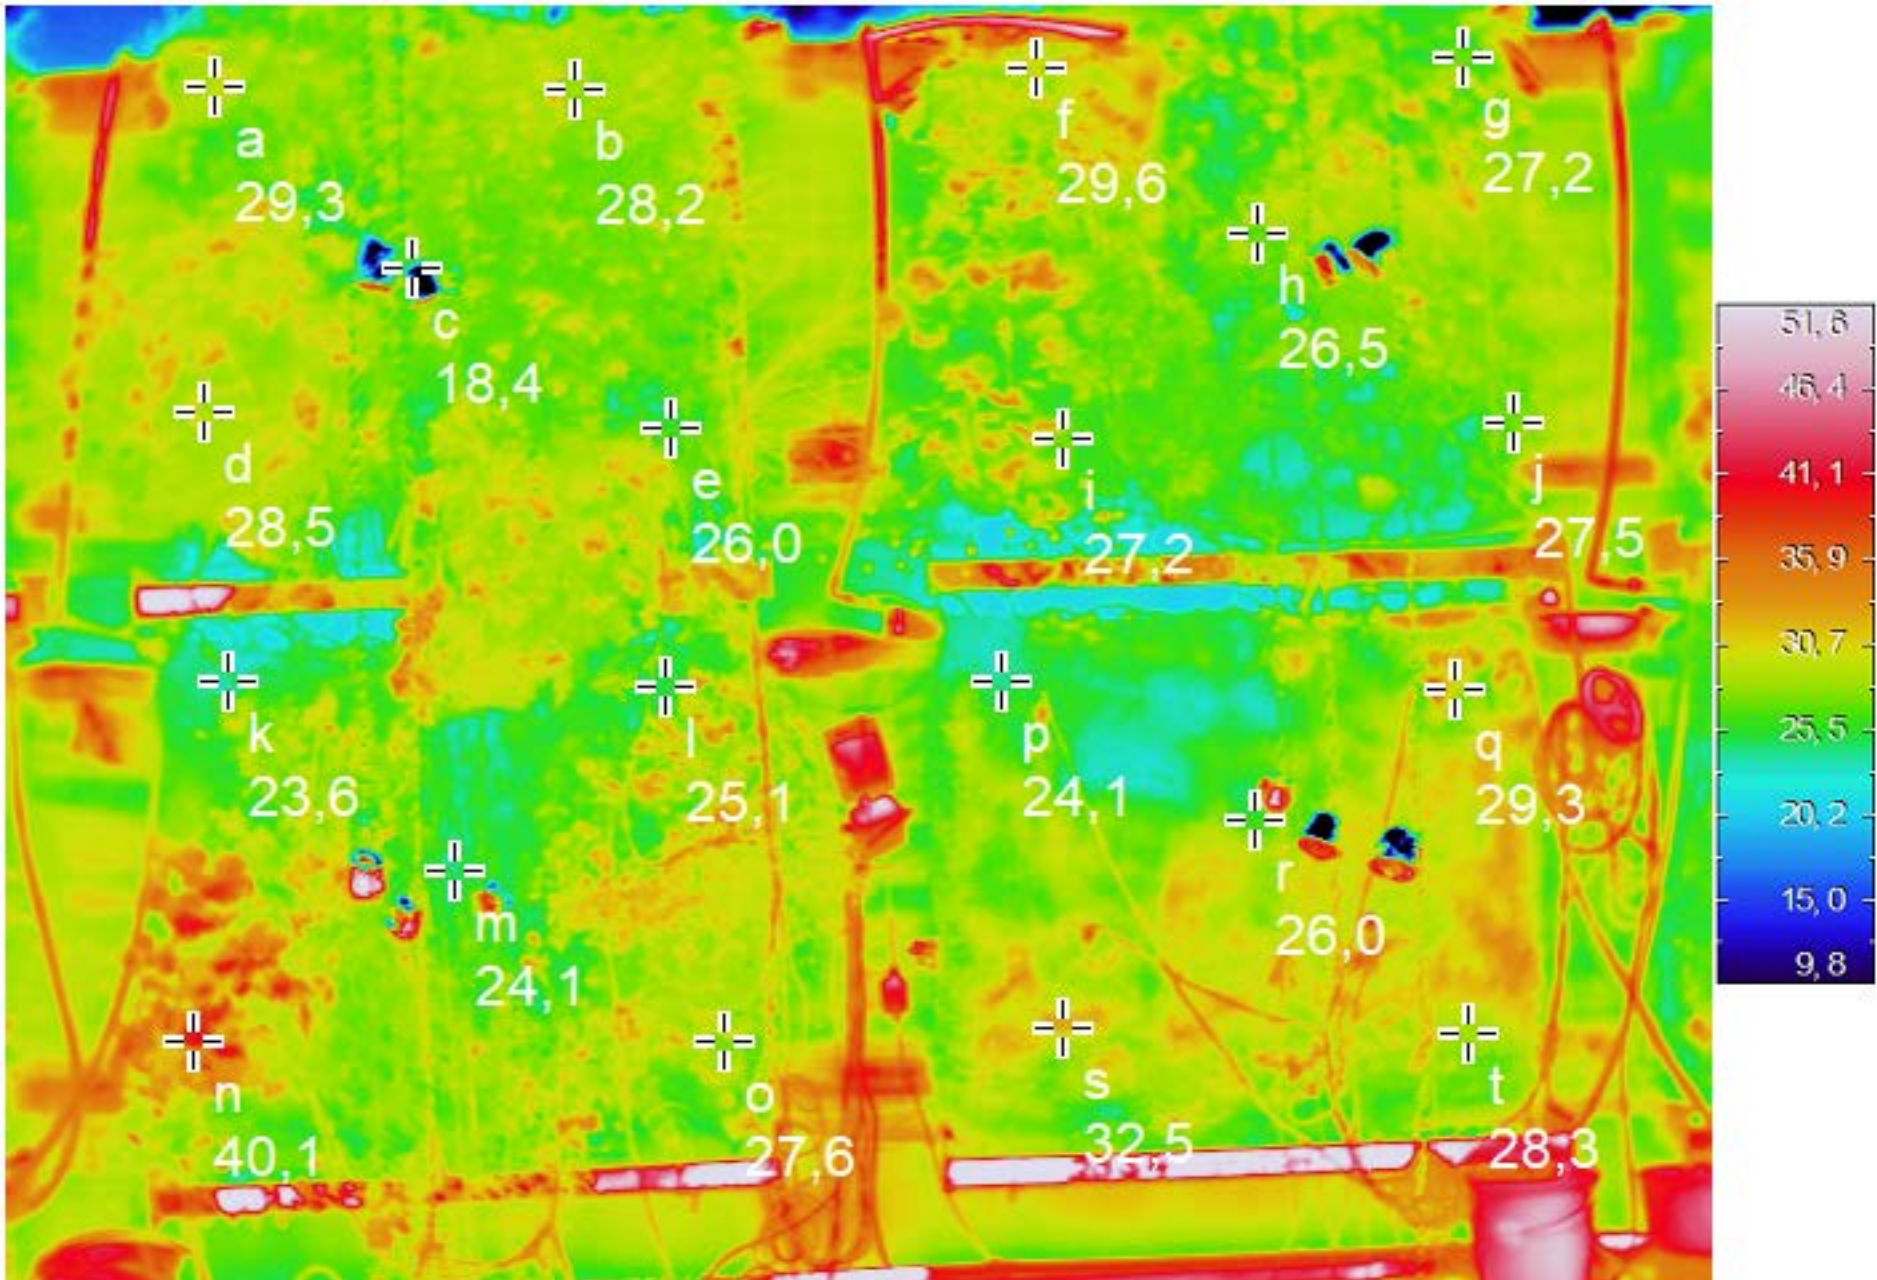

DateinameT02031IR.JPG  
Messtag:2019/06/18  
Messzeit:12:47:12  
Kommentar:  
Kameramodell:R500P  
Range:1[-20,0C-60,0C]  
BildmodusMEDx1,00  
Externes Objektiv:Standard  
Emissionsgrad:1.00  
Ambient Temp: 24,9IC  
IR Bildx1,00



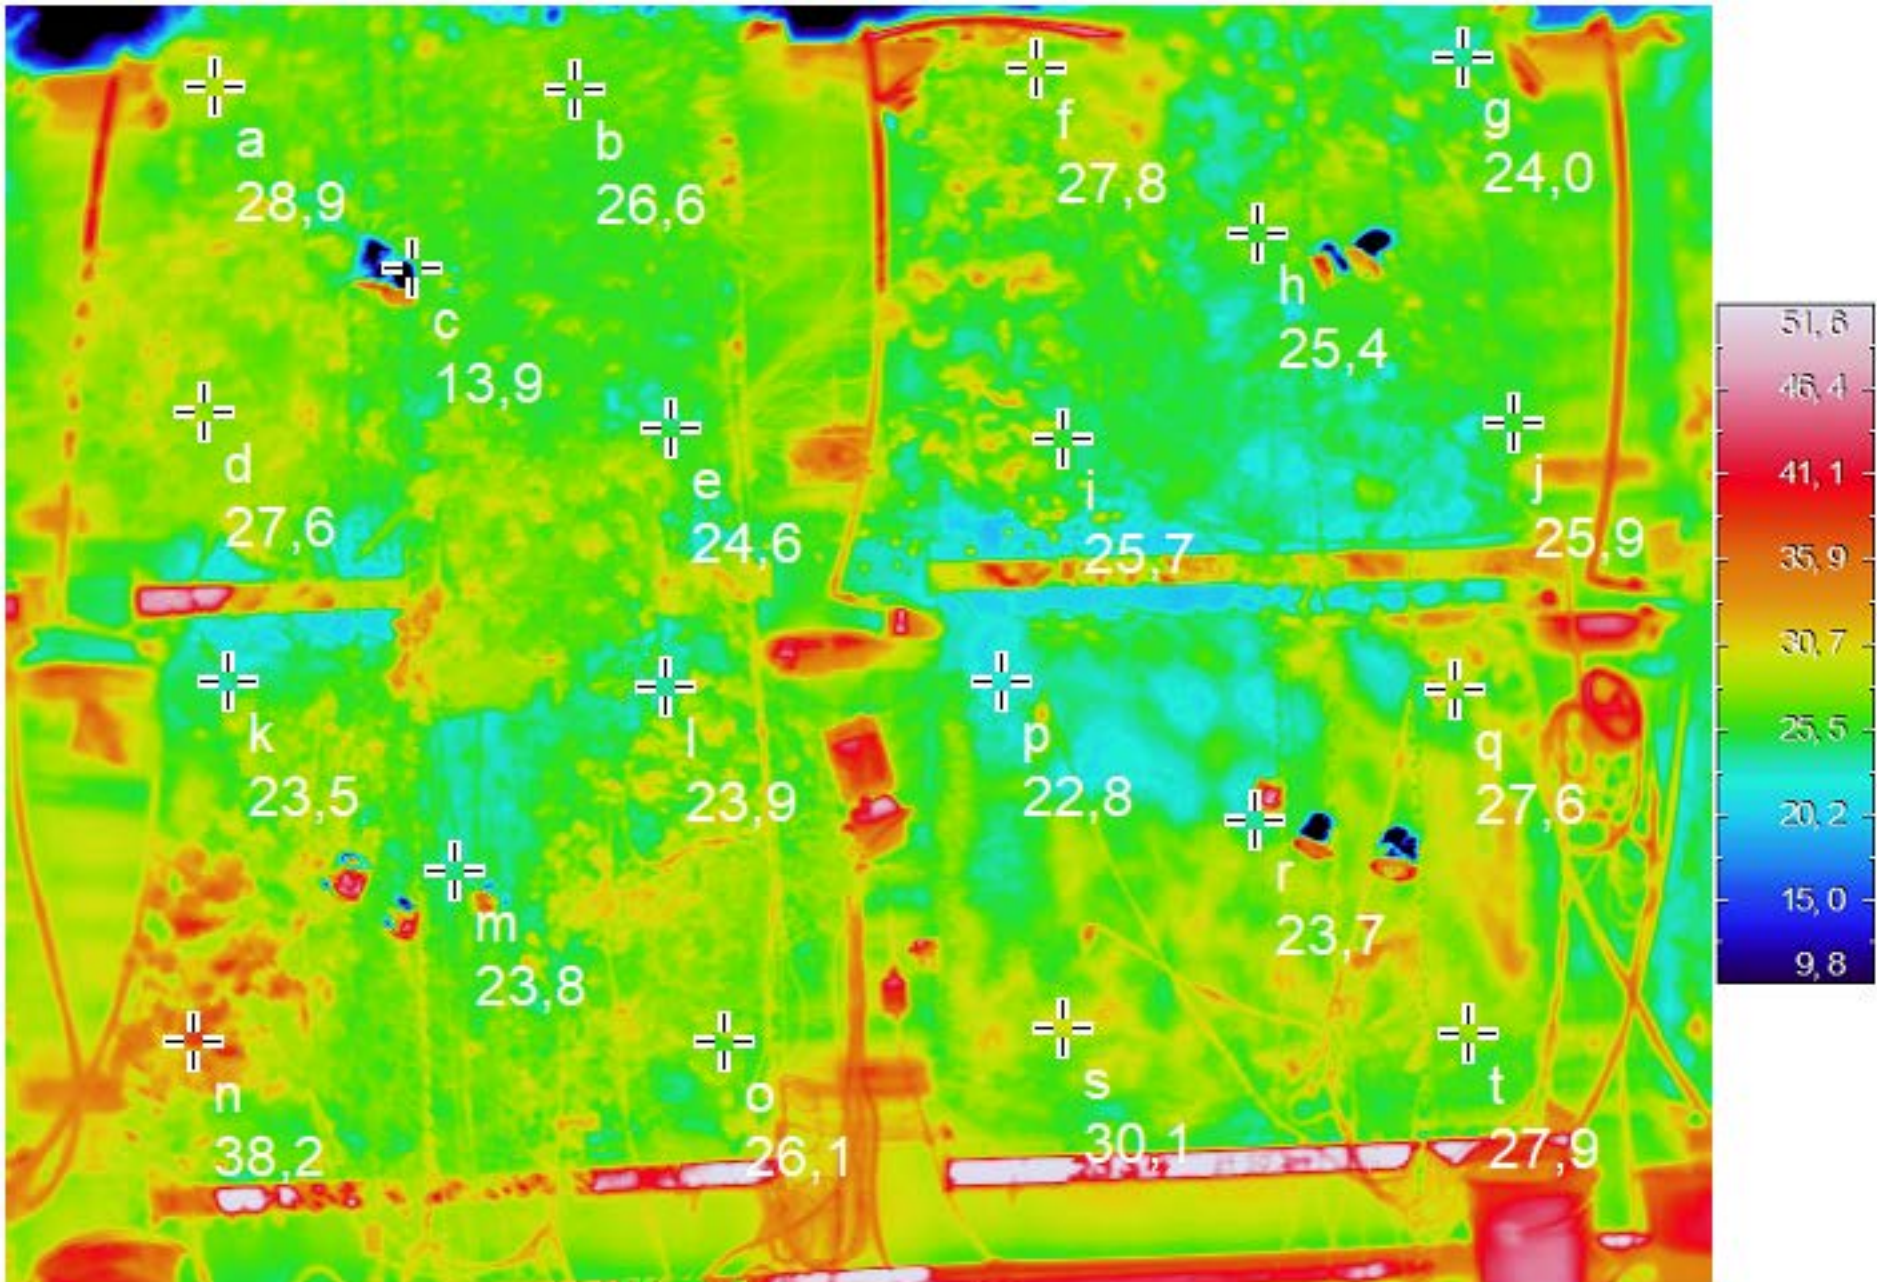

DateinameT02032IR.JPG  
Messtag:2019/06/18  
Messzeit:12:51:12  
Kommentar:  
Kameramodell:R500P  
Range:1[-20,0C-60,0C]  
BildmodusMEDx1,00  
Externes Objektiv:Standard  
Emissionsgrad:1.00  
Ambient Temp: 24,9IC  
IR Bildx1,00



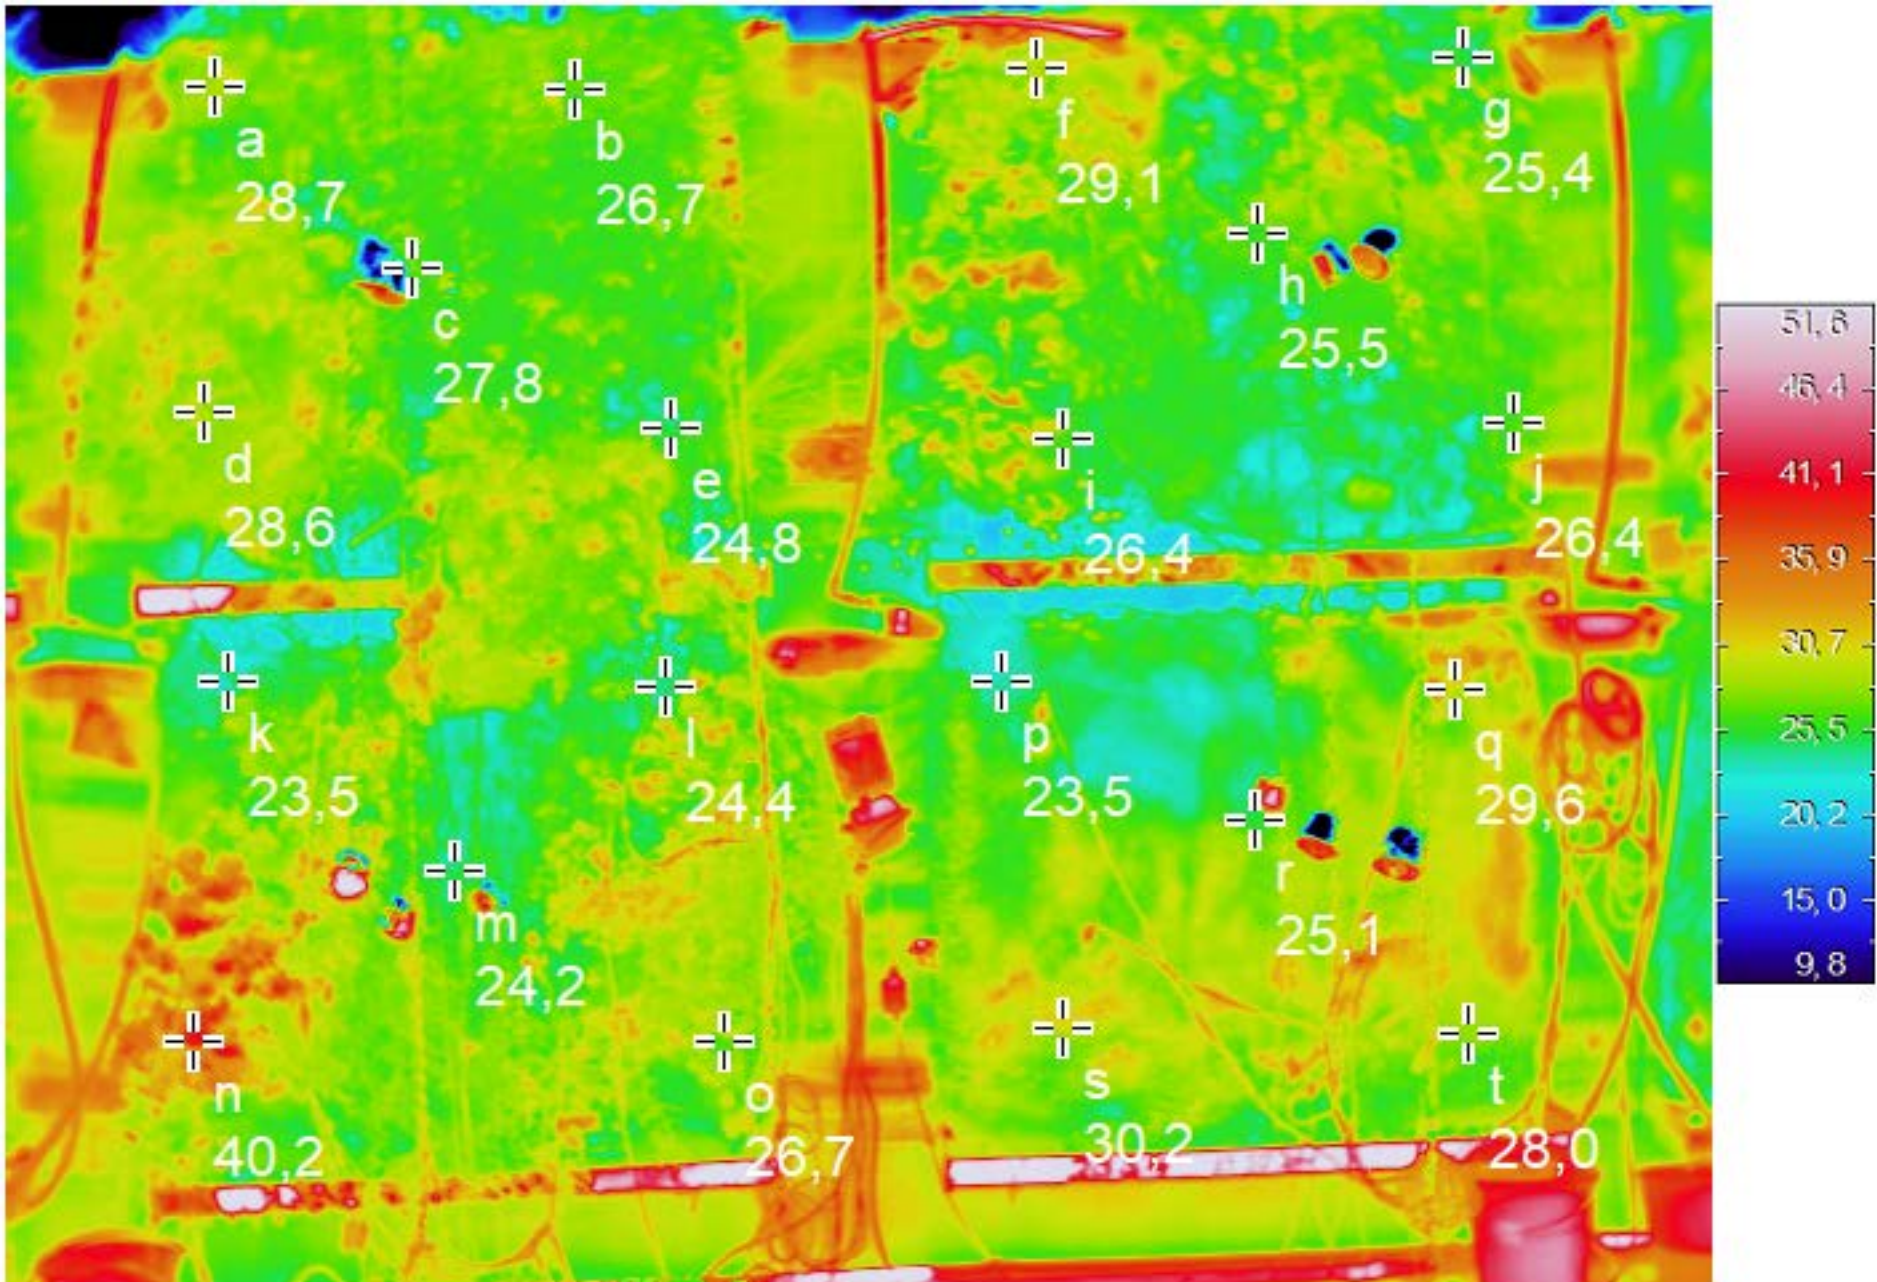

DateinameT02033IR.JPG  
Messtag:2019/06/18  
Messzeit:12:55:13  
Kommentar:  
Kameramodell:R500P  
Range:1[-20,0C-60,0C]  
BildmodusMEDx1,00  
Externes Objektiv:Standard  
Emissionsgrad:1.00  
Ambient Temp: 24,9IC  
IR Bildx1,00



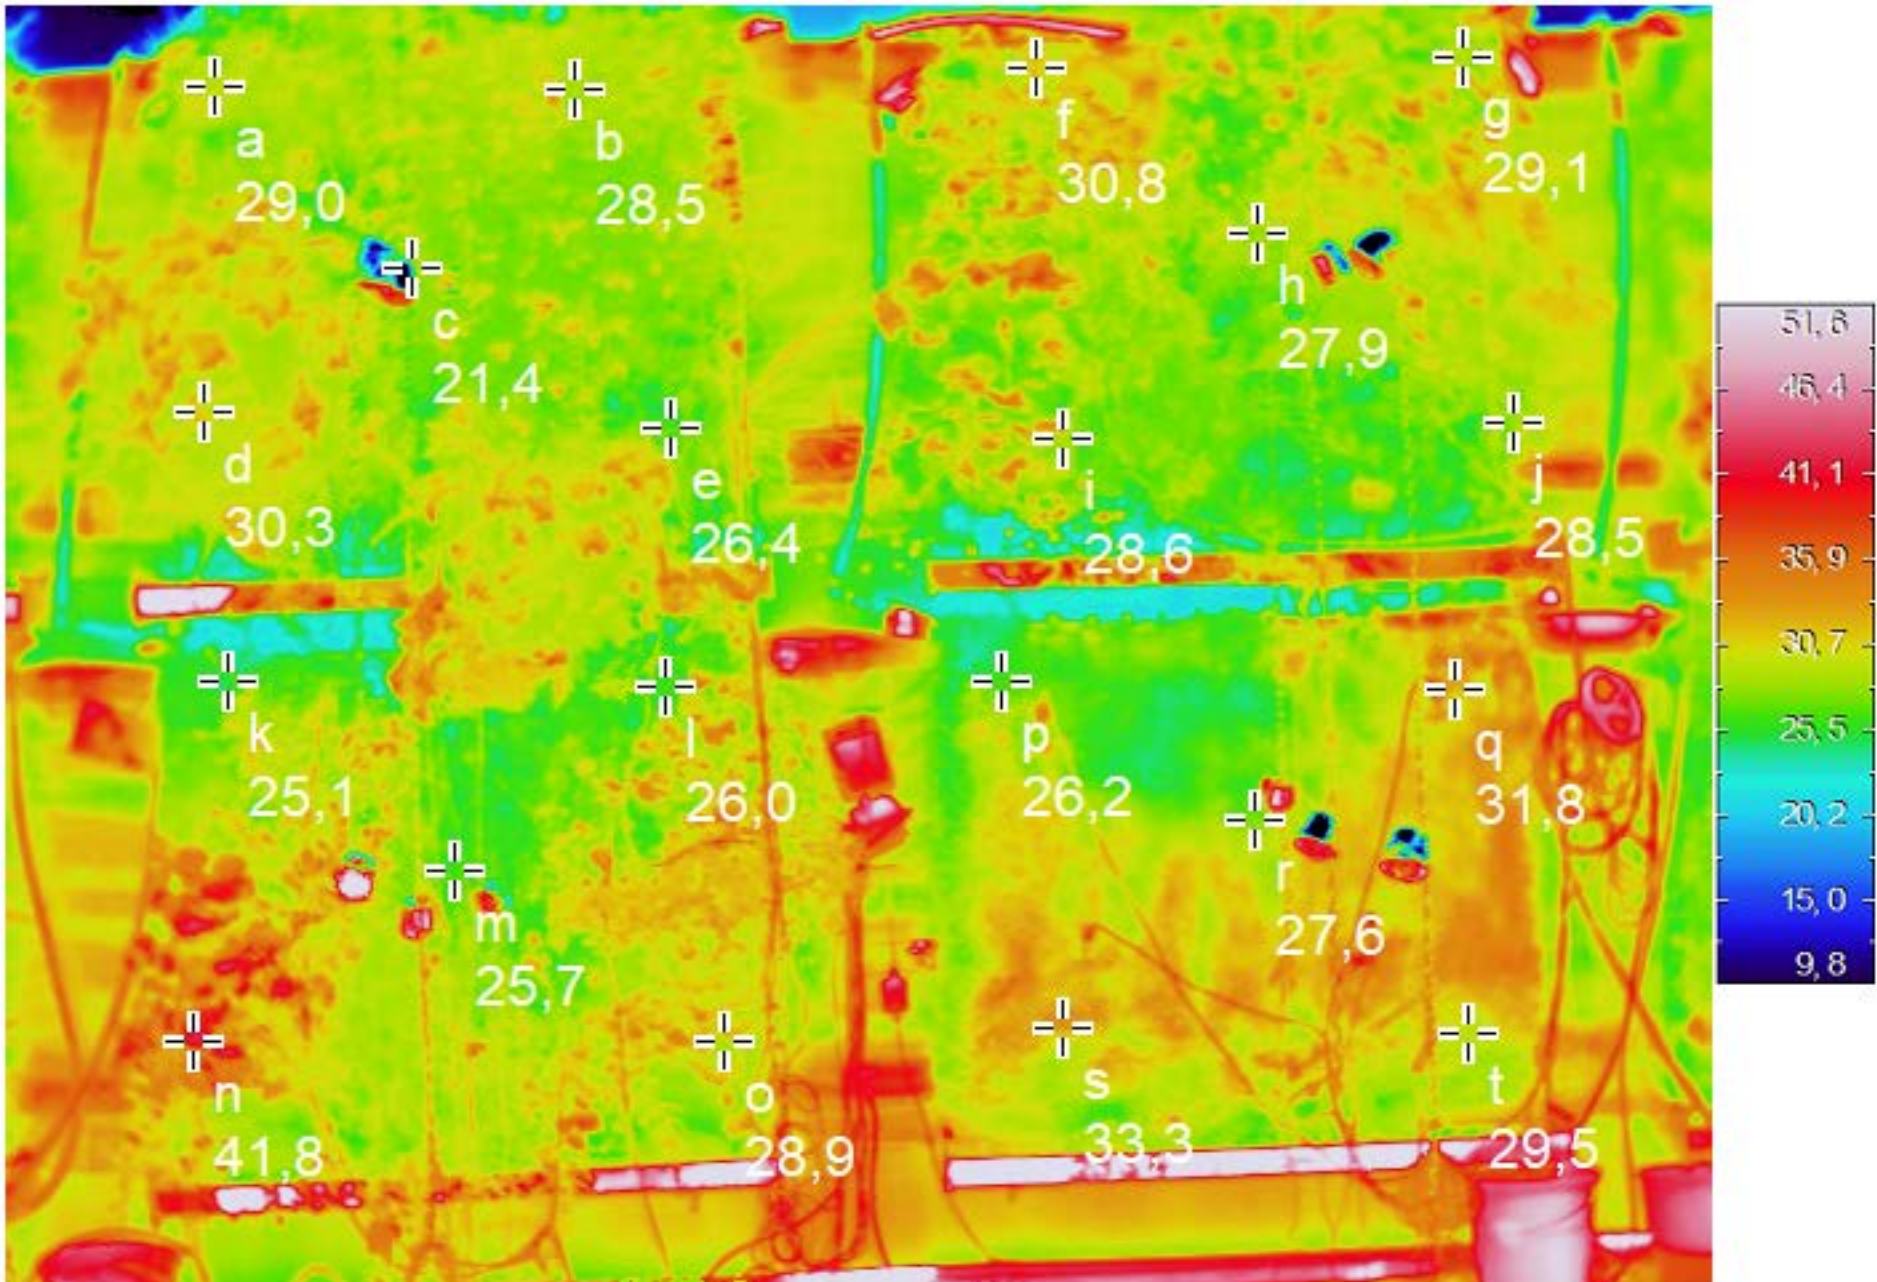

DateinameT02034IR.JPG  
Messtag:2019/06/18  
Messzeit:12:59:12  
Kommentar:  
Kameramodell:R500P  
Range:1[-20,0C-60,0C]  
BildmodusMEDx1,00  
Externes Objektiv:Standard  
Emissionsgrad:1.00  
Ambient Temp: 24,9IC  
IR Bildx1,00



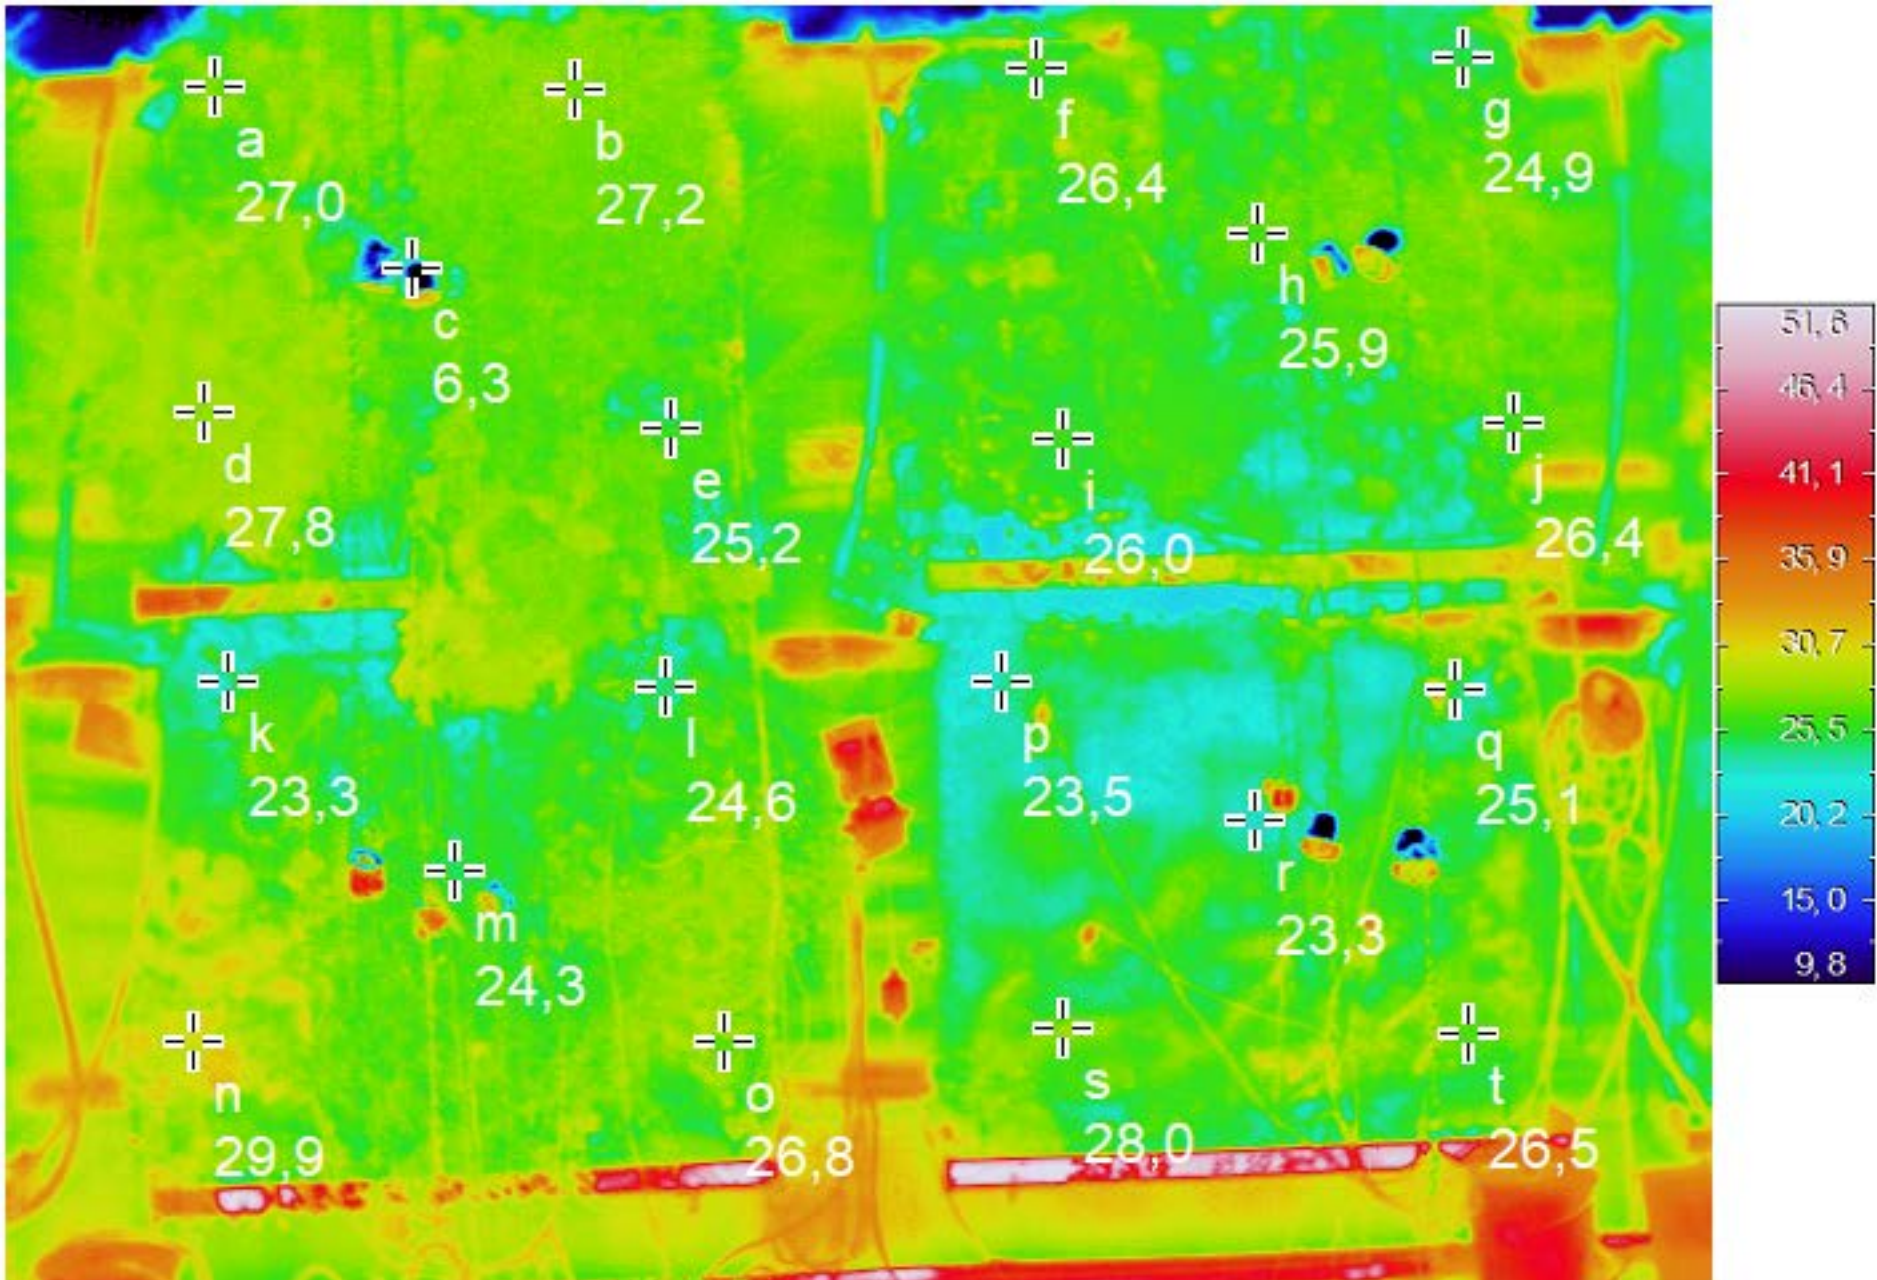

DateinameT02035IR.JPG  
Messtag:2019/06/18  
Messzeit:13:03:12  
Kommentar:  
Kameramodell:R500P  
Range:1[-20,0C-60,0C]  
BildmodusMEDx1,00  
Externes Objektiv:Standard  
Emissionsgrad:1.00  
Ambient Temp: 24,9IC  
IR Bildx1,00



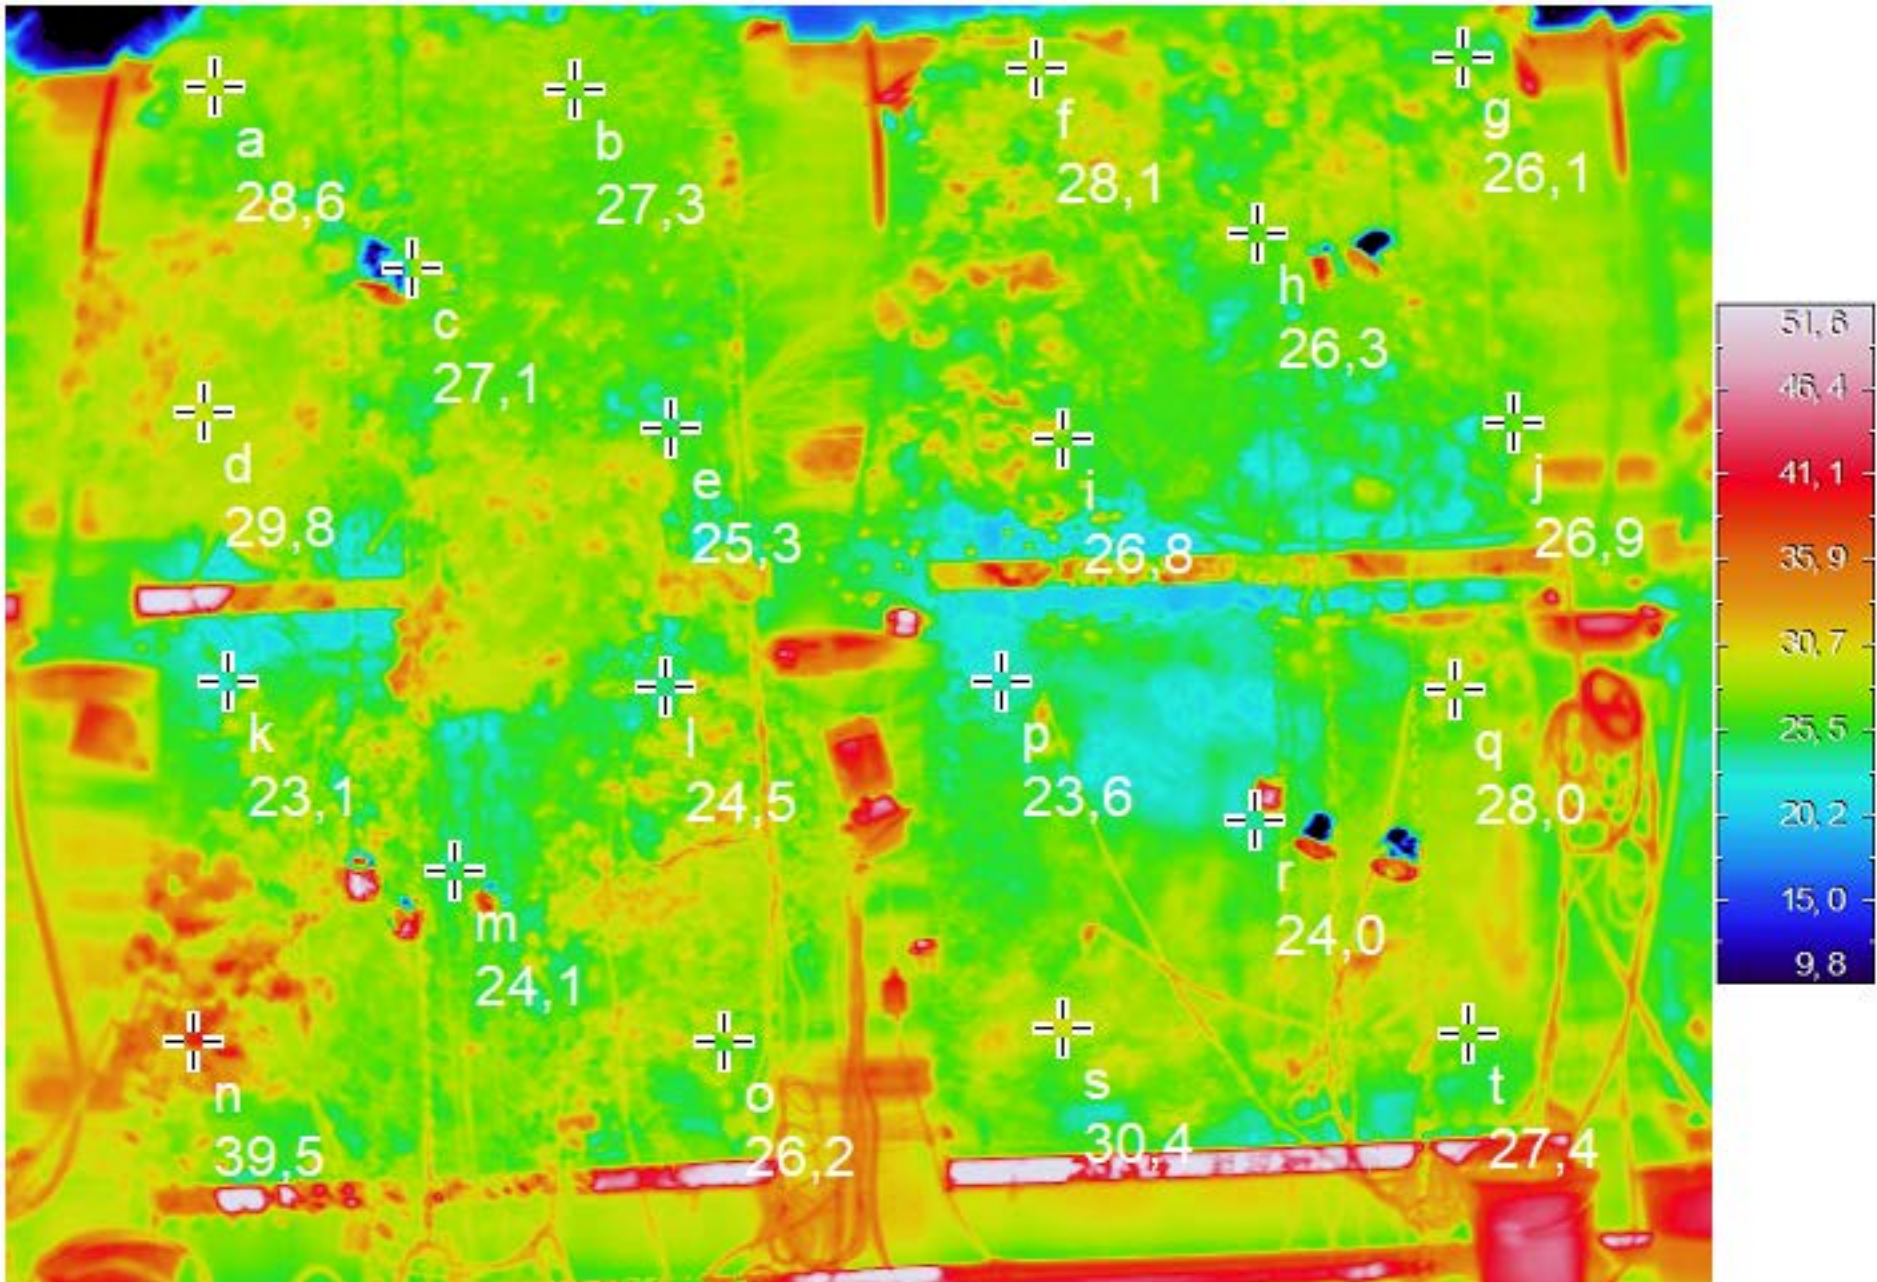

DateinameT02036IR.JPG  
Messtag:2019/06/18  
Messzeit:13:07:13  
Kommentar:  
Kameramodell:R500P  
Range:1[-20,0C-60,0C]  
BildmodusMEDx1,00  
Externes Objektiv:Standard  
Emissionsgrad:1.00  
Ambient Temp: 24,9IC  
IR Bildx1,00



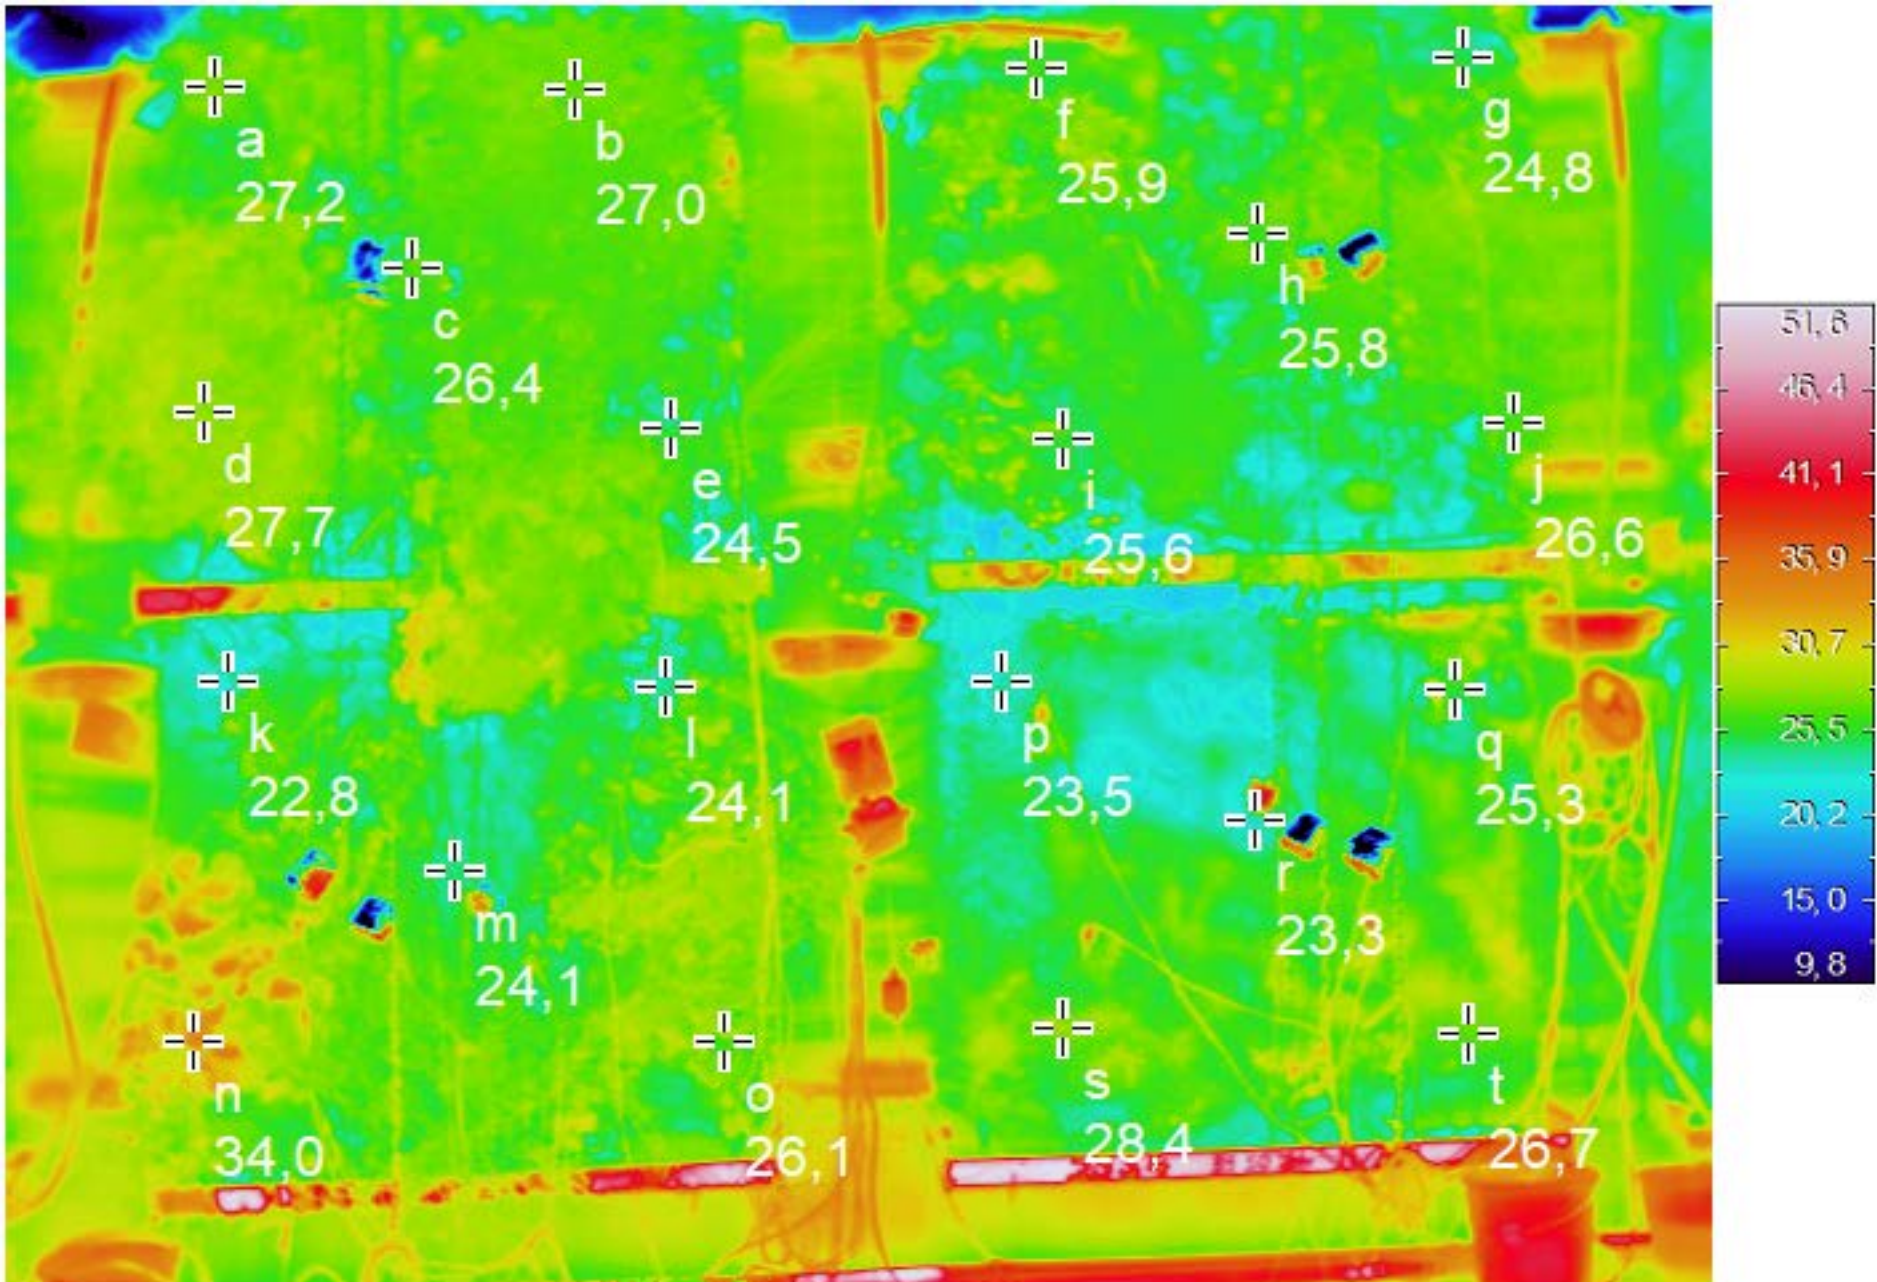

DateinameT02037IR.JPG  
Messtag:2019/06/18  
Messzeit:13:11:12  
Kommentar:  
Kameramodell:R500P  
Range:1[-20,0C-60,0C]  
BildmodusMEDx1,00  
Externes Objektiv:Standard  
Emissionsgrad:1.00  
Ambient Temp: 24,9IC  
IR Bildx1,00



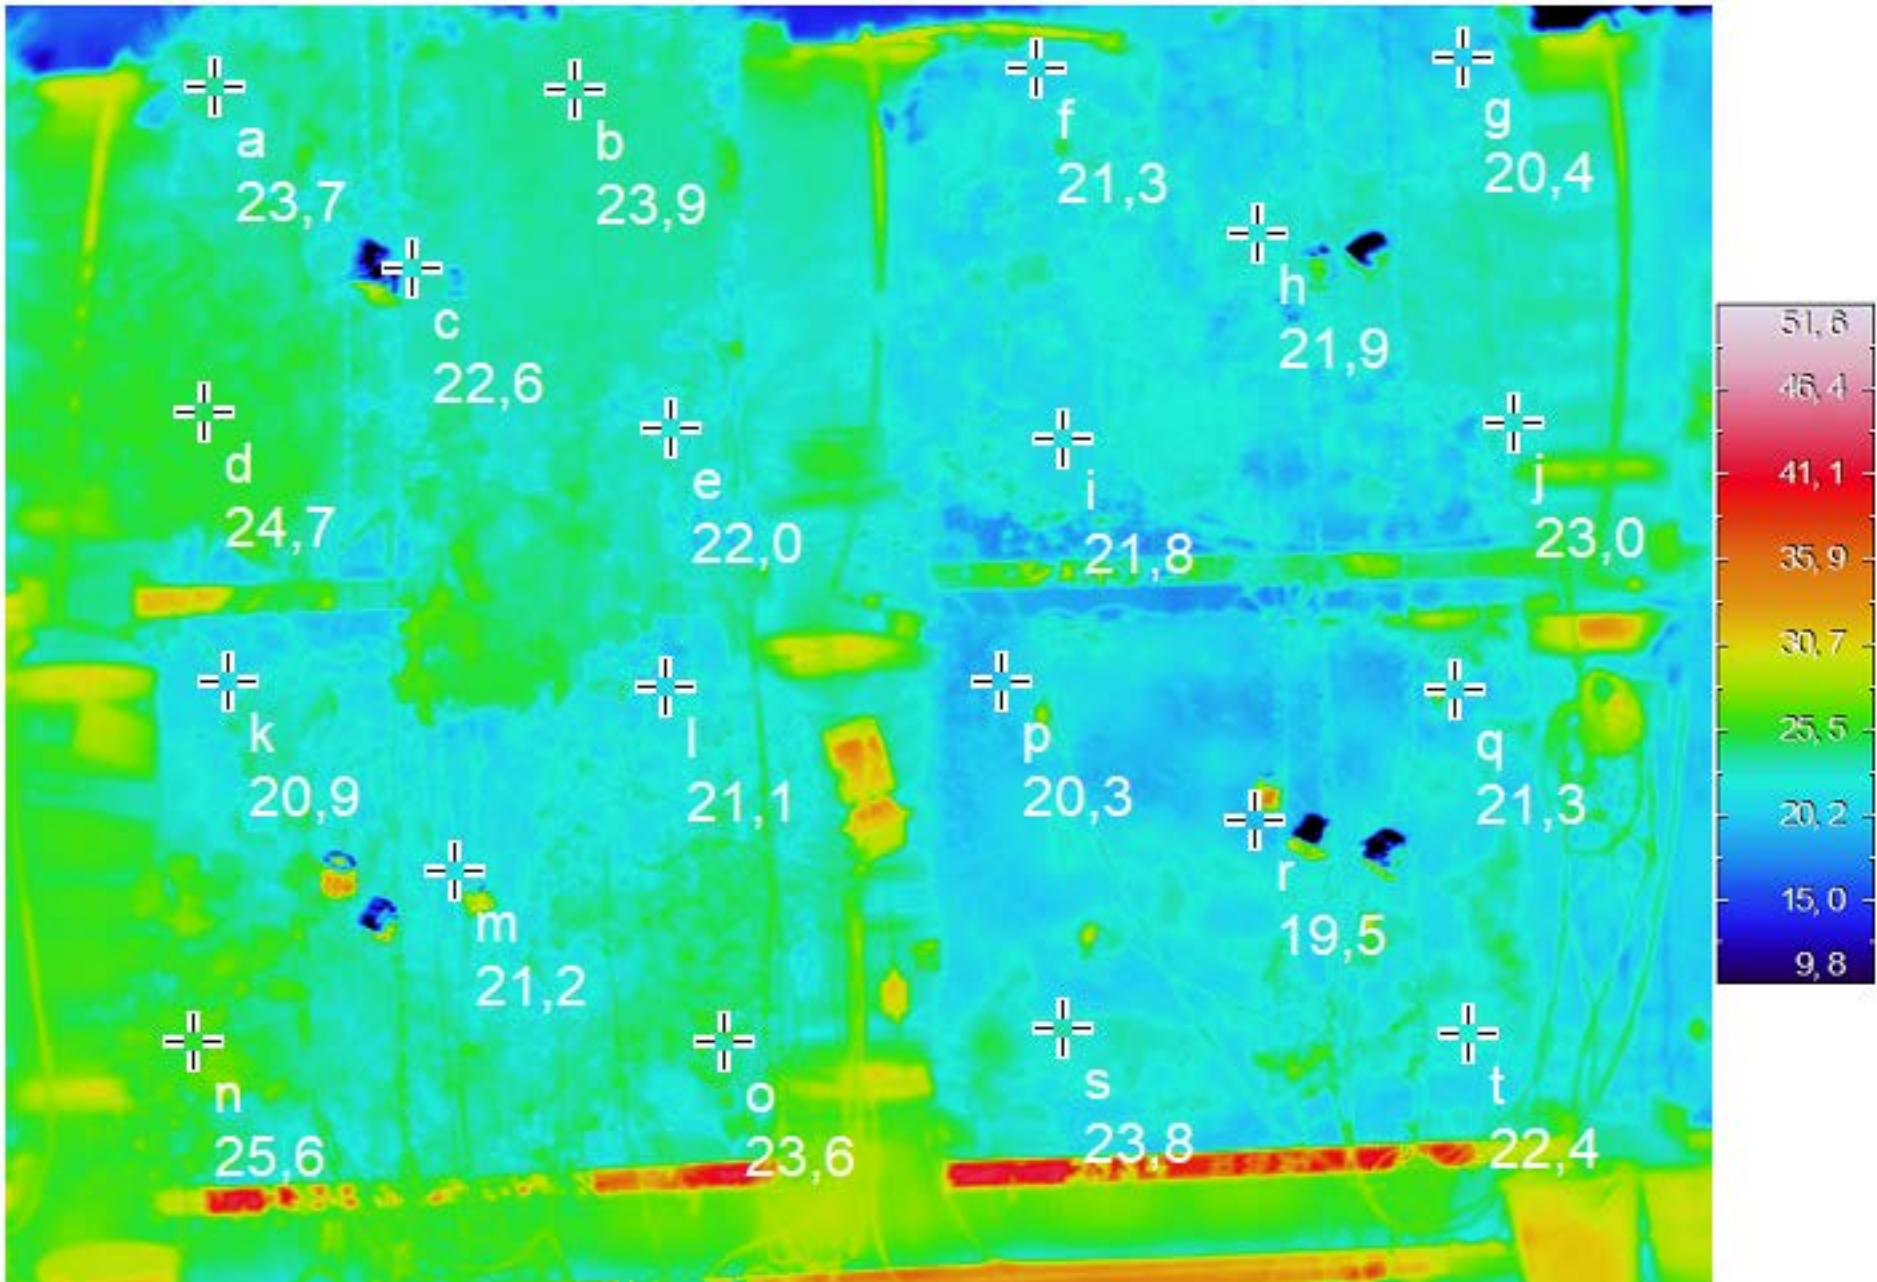

DateinameT02038IR.JPG  
Messtag:2019/06/18  
Messzeit:13:15:12  
Kommentar:  
Kameramodell:R500P  
Range:1(-20,0C-60,0C)  
BildmodusMEDx1,00  
Externes Objektiv:Standard  
Emissionsgrad:1.00  
Ambient Temp: 24,9IC  
IR Bildx1,00



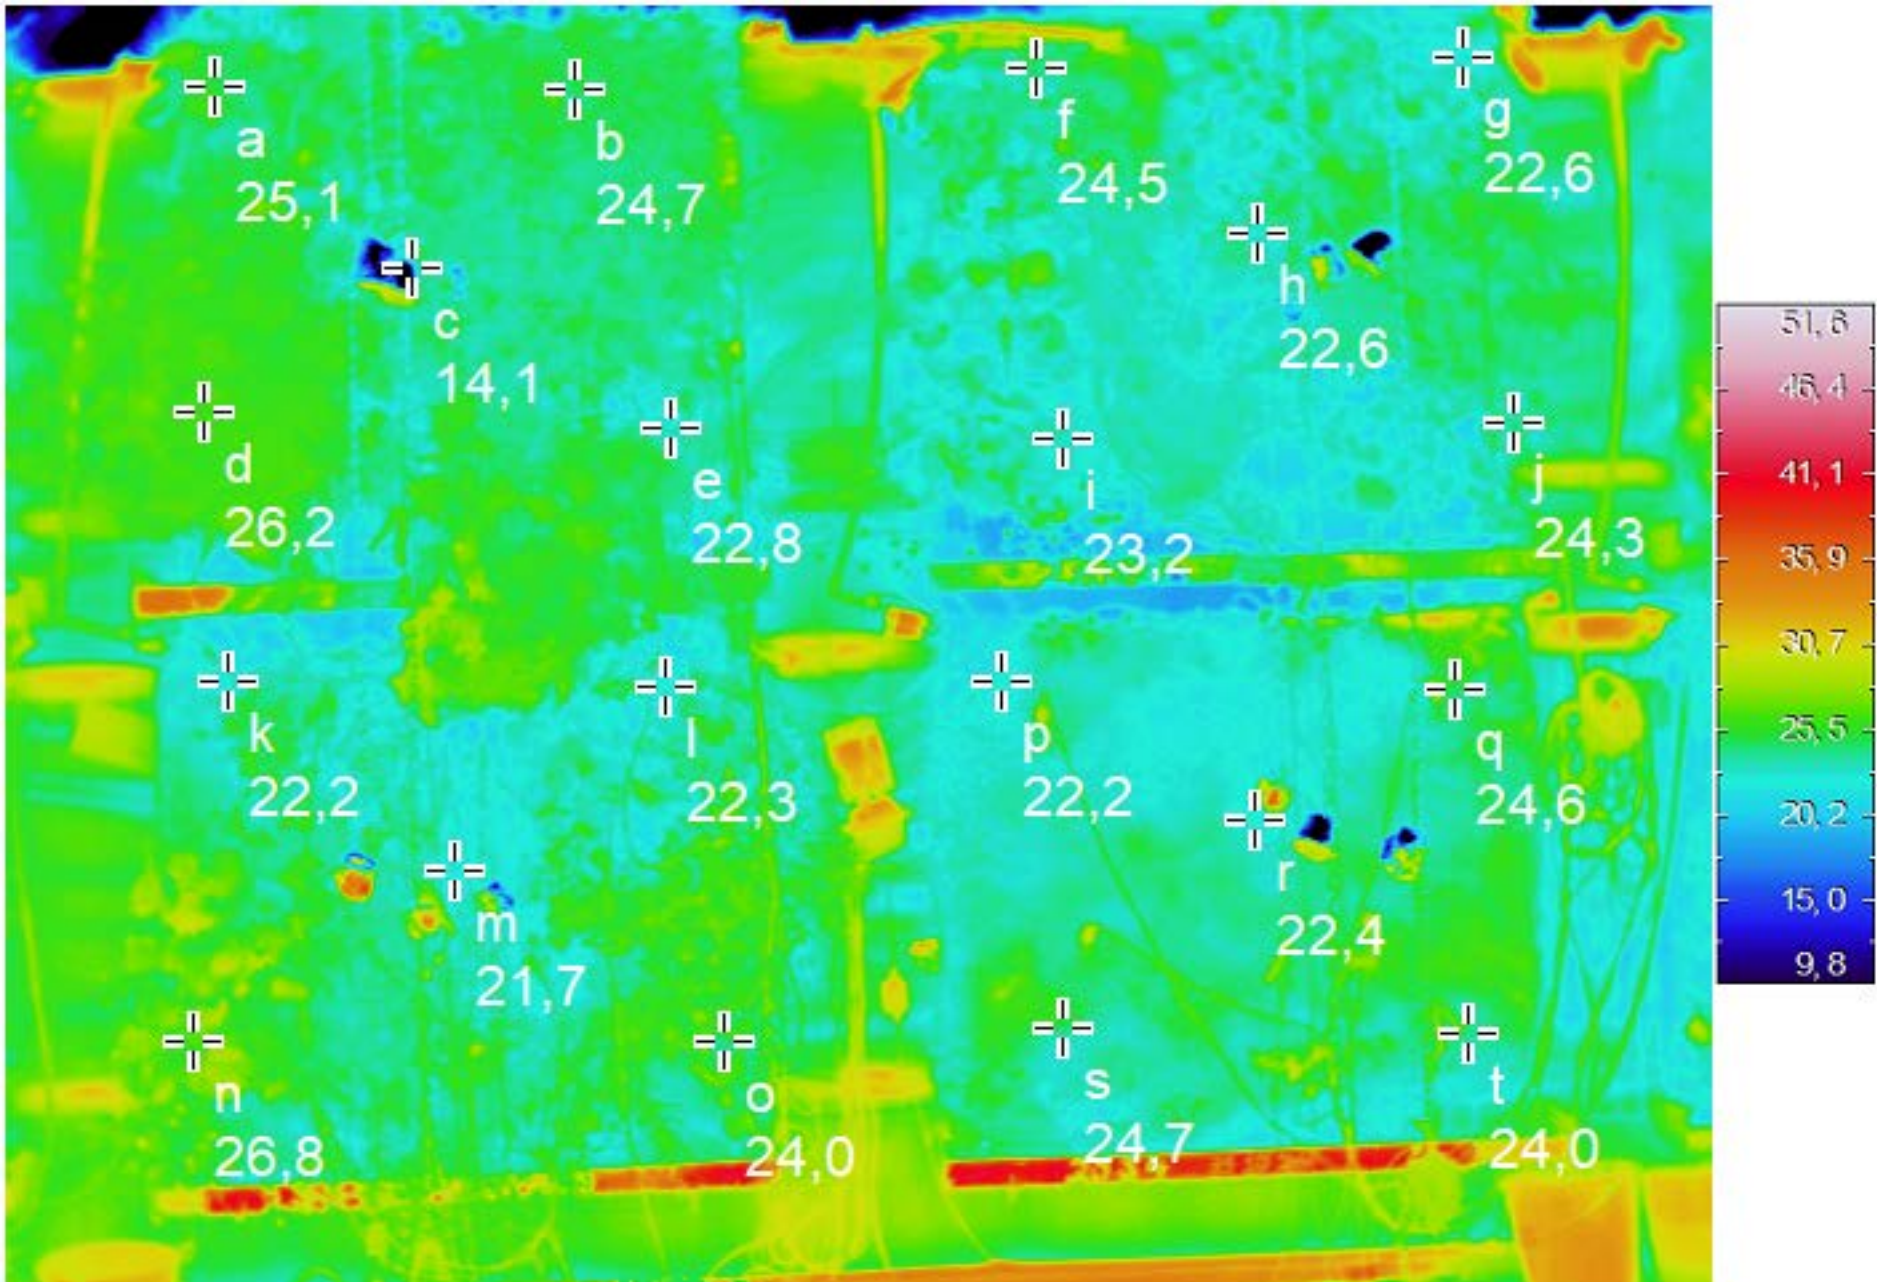

DateinameT02039IR.JPG  
Messtag:2019/06/18  
Messzeit:13:19:12  
Kommentar:  
Kameramodell:R500P  
Range:1[-20,0C-60,0C]  
BildmodusMEDx1,00  
Externes Objektiv:Standard  
Emissionsgrad:1.00  
Ambient Temp: 24,9IC  
IR Bildx1,00



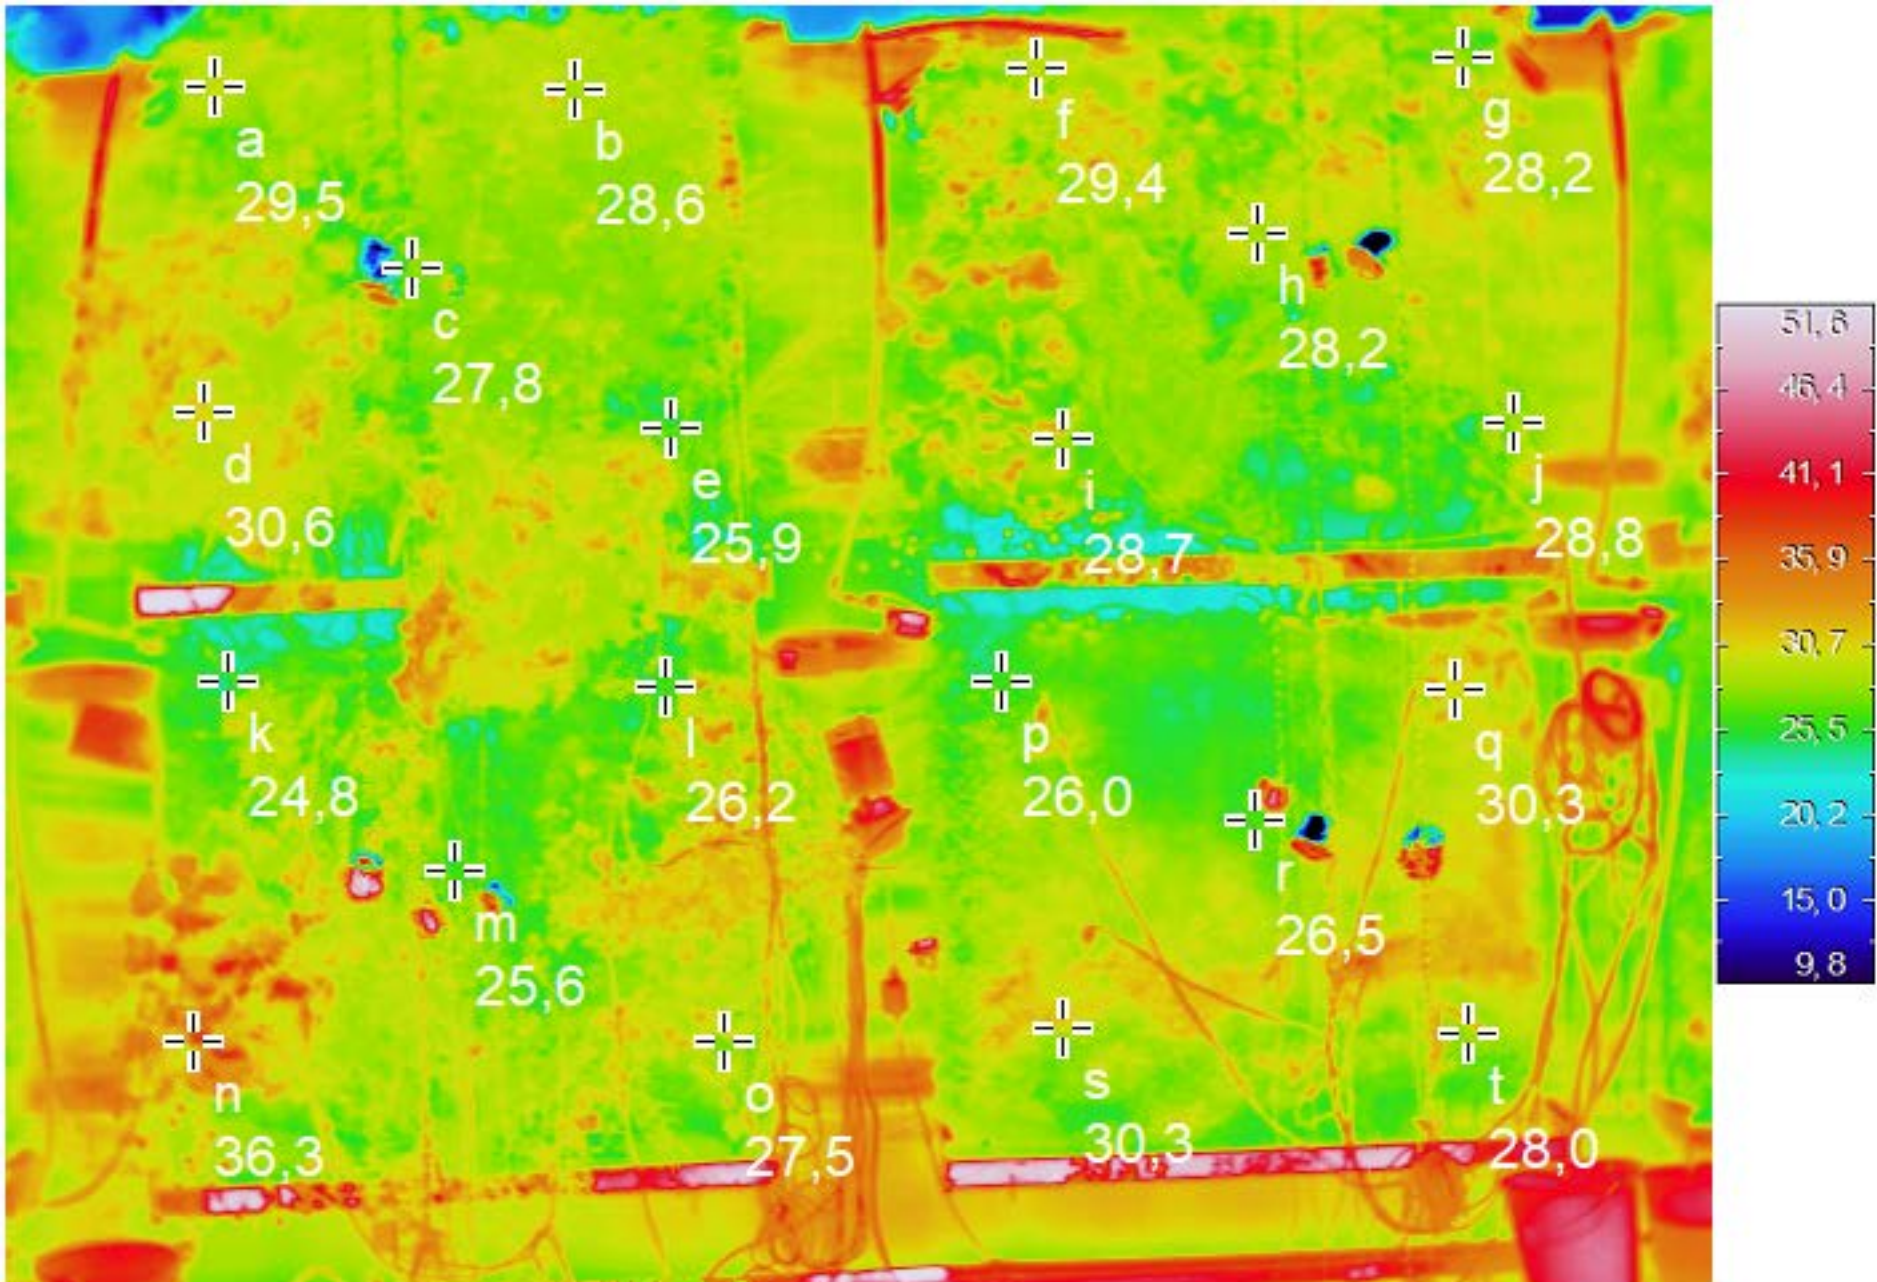

DateinameT02040IR.JPG  
Messtag:2019/06/18  
Messzeit:13:23:12  
Kommentar:  
Kameramodell:R500P  
Range:1[-20,0C-60,0C]  
BildmodusMEDx1,00  
Externes Objektiv:Standard  
Emissionsgrad:1.00  
Ambient Temp: 24,9IC  
IR Bildx1,00



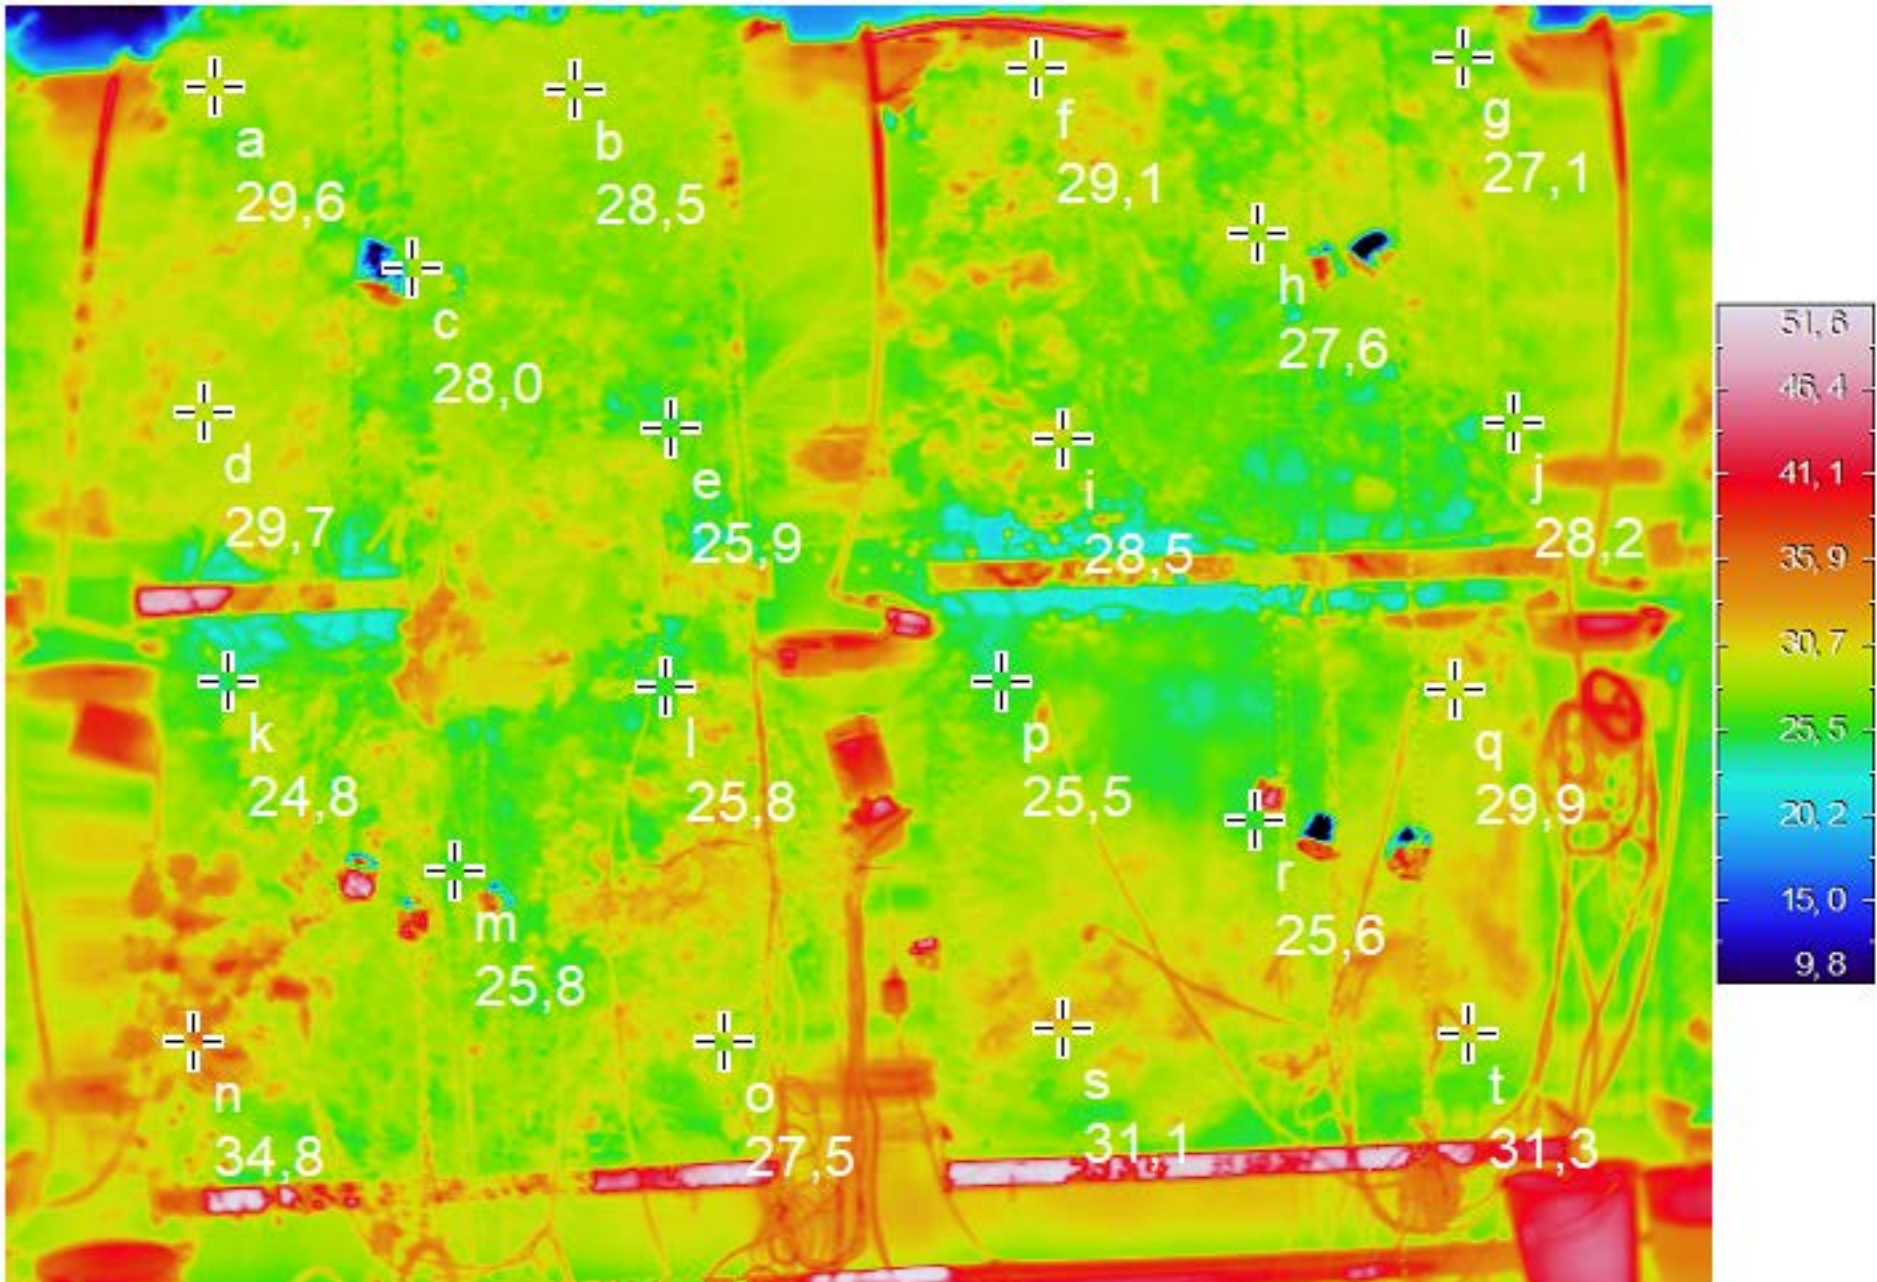

DateinameT02041IR.JPG  
Messtag:2019/06/18  
Messzeit:13:27:13  
Kommentar:  
Kameramodell:R500P  
Range:1[-20,0C-60,0C]  
BildmodusMEDx1,00  
Externes Objektiv:Standard  
Emissionsgrad:1.00  
Ambient Temp: 24,9IC  
IR Bildx1,00



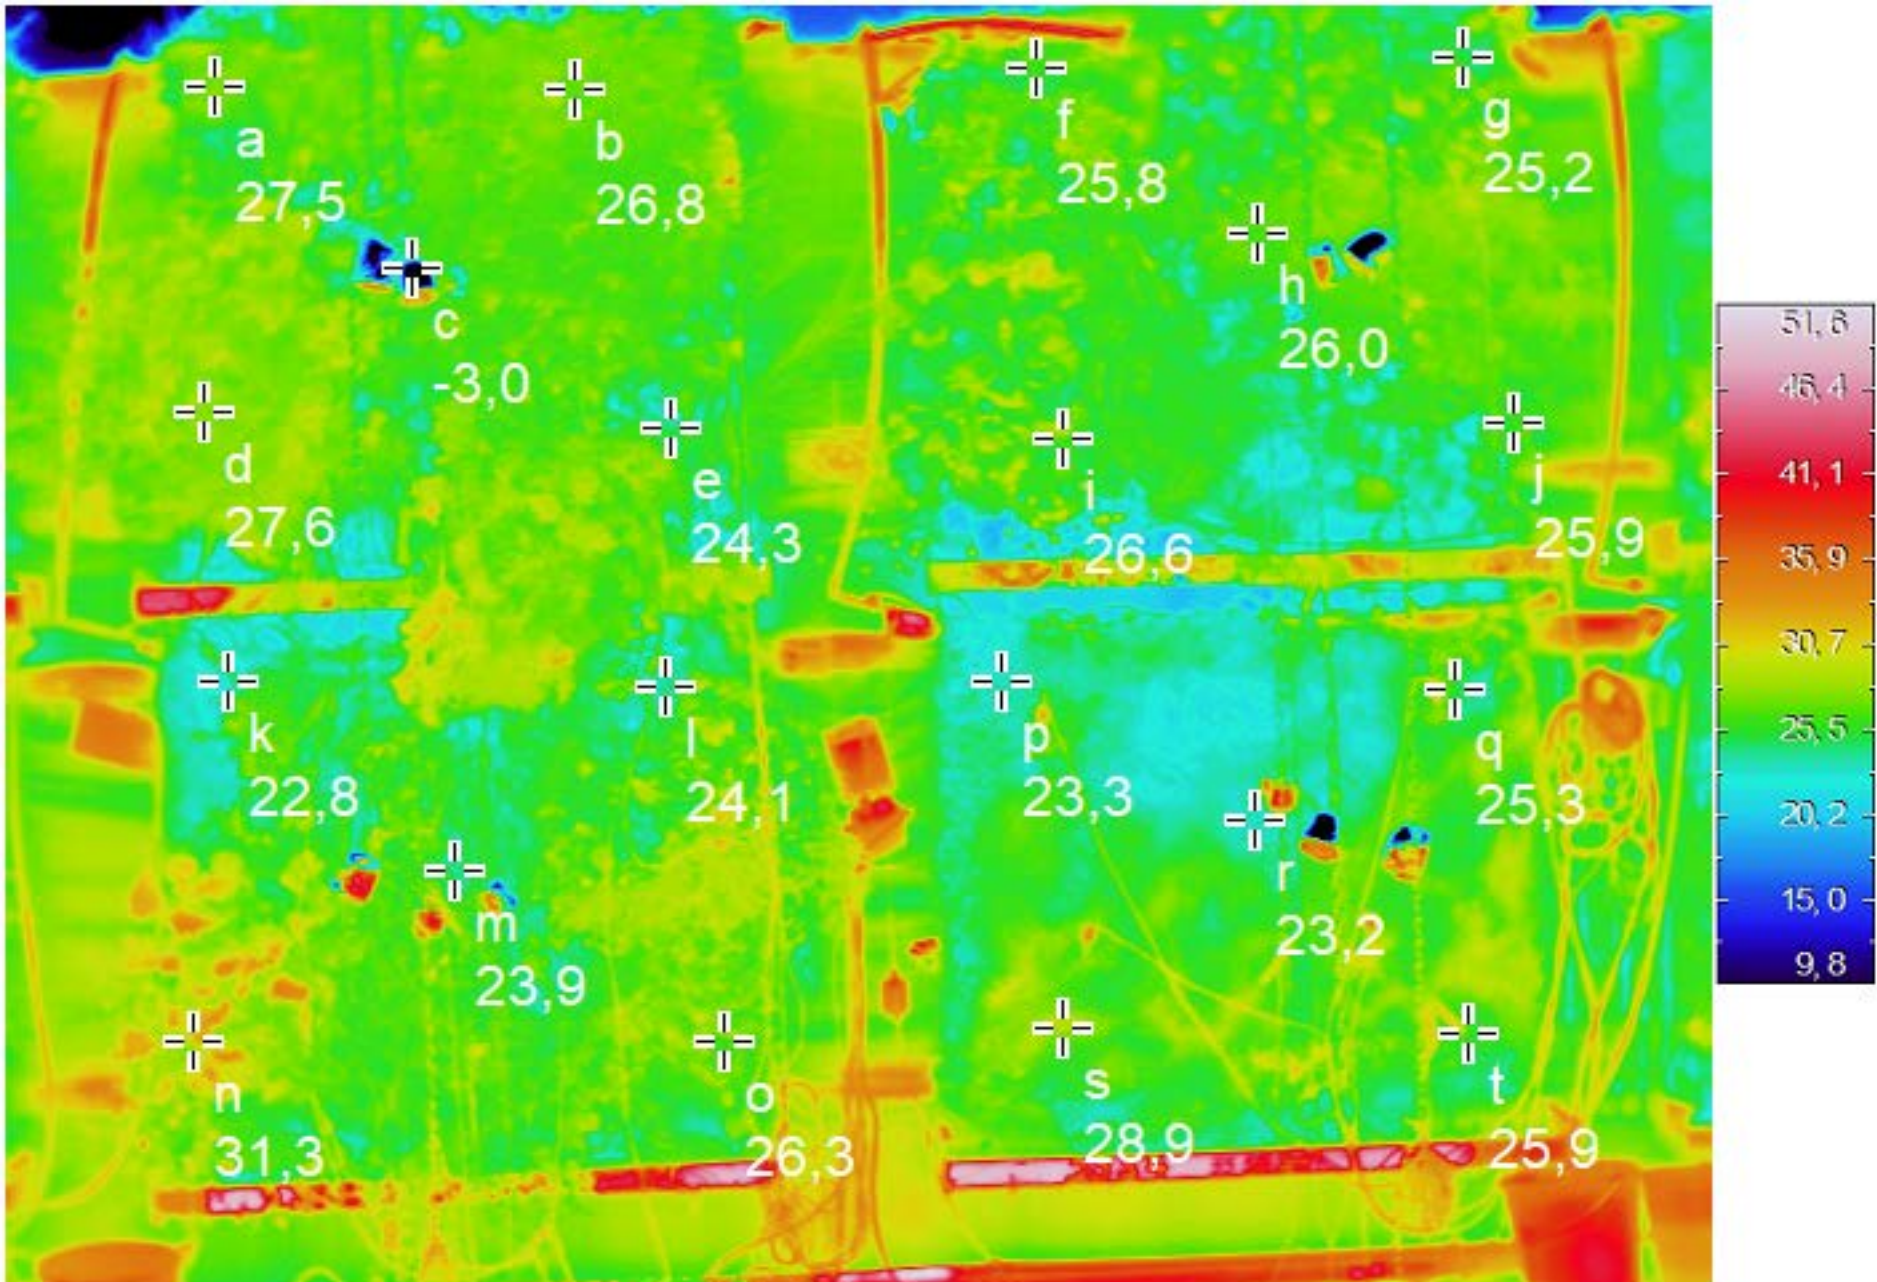

DateinameT02042IR.JPG  
Messtag:2019/06/18  
Messzeit:13:31:13  
Kommentar:  
Kameramodell:R500P  
Range:1[-20,0C-60,0C]  
BildmodusMEDx1,00  
Externes Objektiv:Standard  
Emissionsgrad:1.00  
Ambient Temp: 24,9IC  
IR Bildx1,00



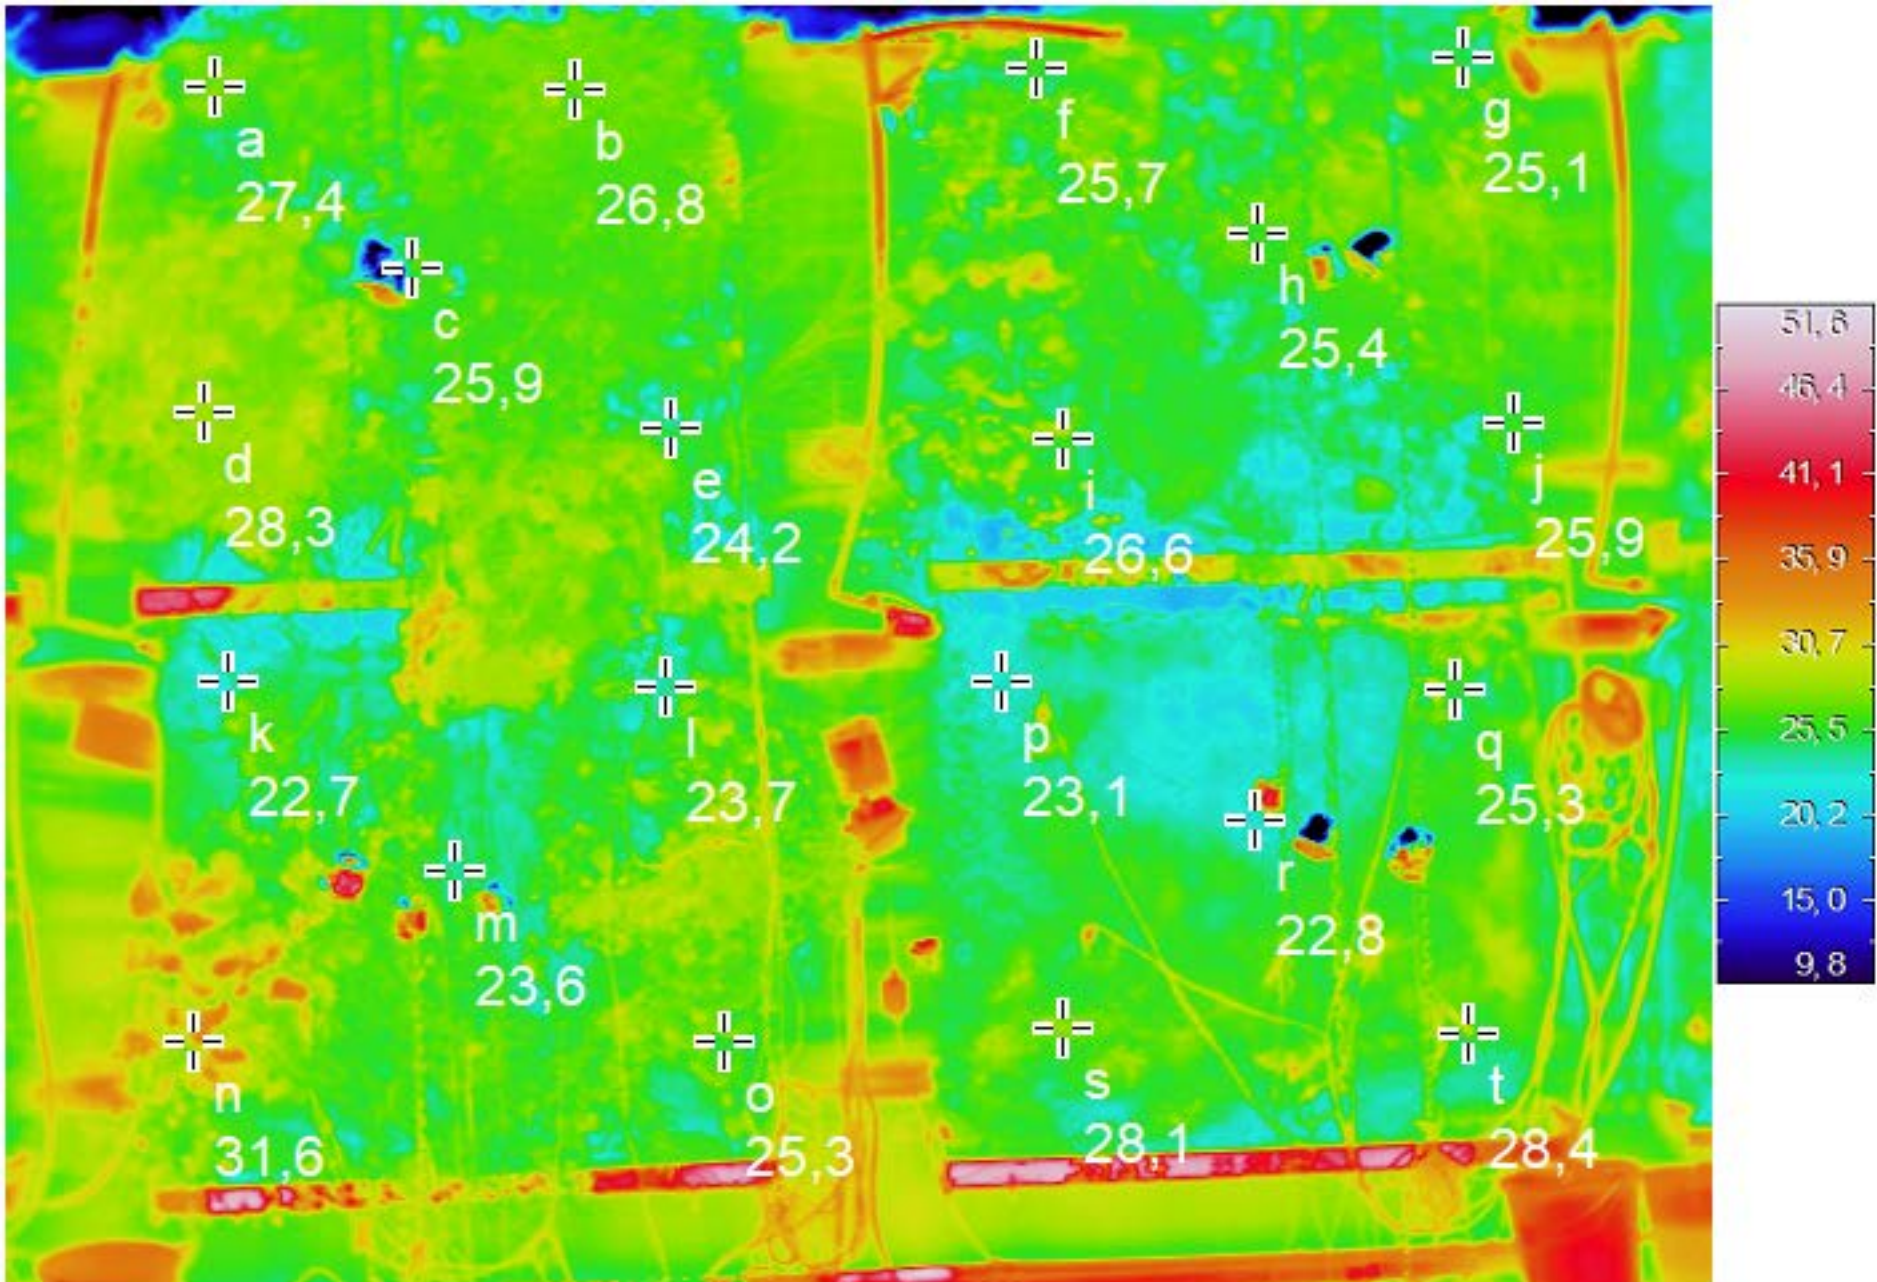

DateinameT02043IR.JPG  
Messtag:2019/06/18  
Messzeit:13:35:12  
Kommentar:  
Kameramodell:R500P  
Range:1[-20,0C-60,0C]  
BildmodusMEDx1,00  
Externes Objektiv:Standard  
Emissionsgrad:1.00  
Ambient Temp: 24,9IC  
IR Bildx1,00



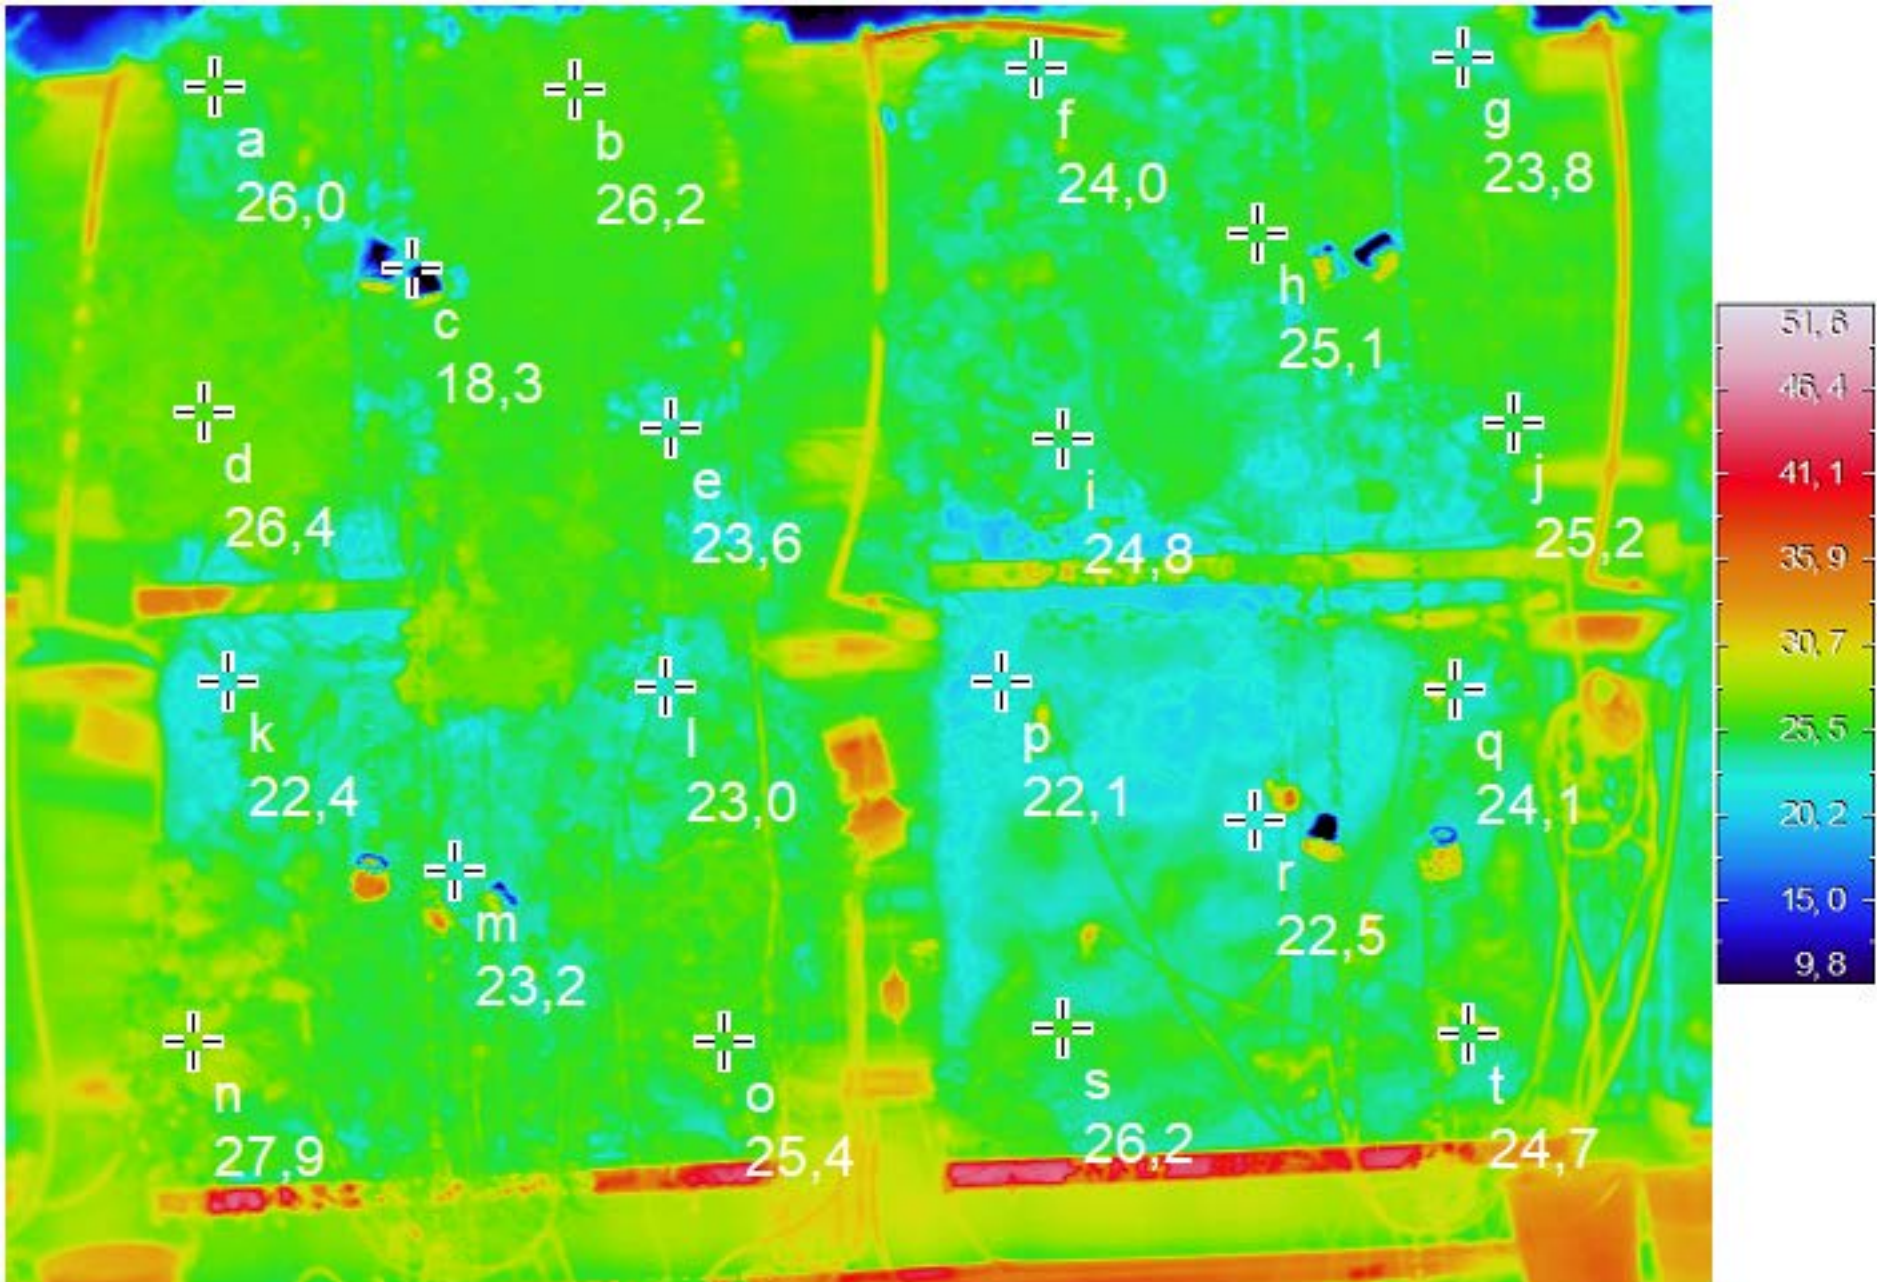

DateinameT02044IR.JPG  
Messtag:2019/06/18  
Messzeit:13:39:12  
Kommentar:  
Kameramodell:R500P  
Range:1[-20,0C-60,0C]  
BildmodusMEDx1,00  
Externes Objektiv:Standard  
Emissionsgrad:1.00  
Ambient Temp: 24,9IC  
IR Bildx1,00



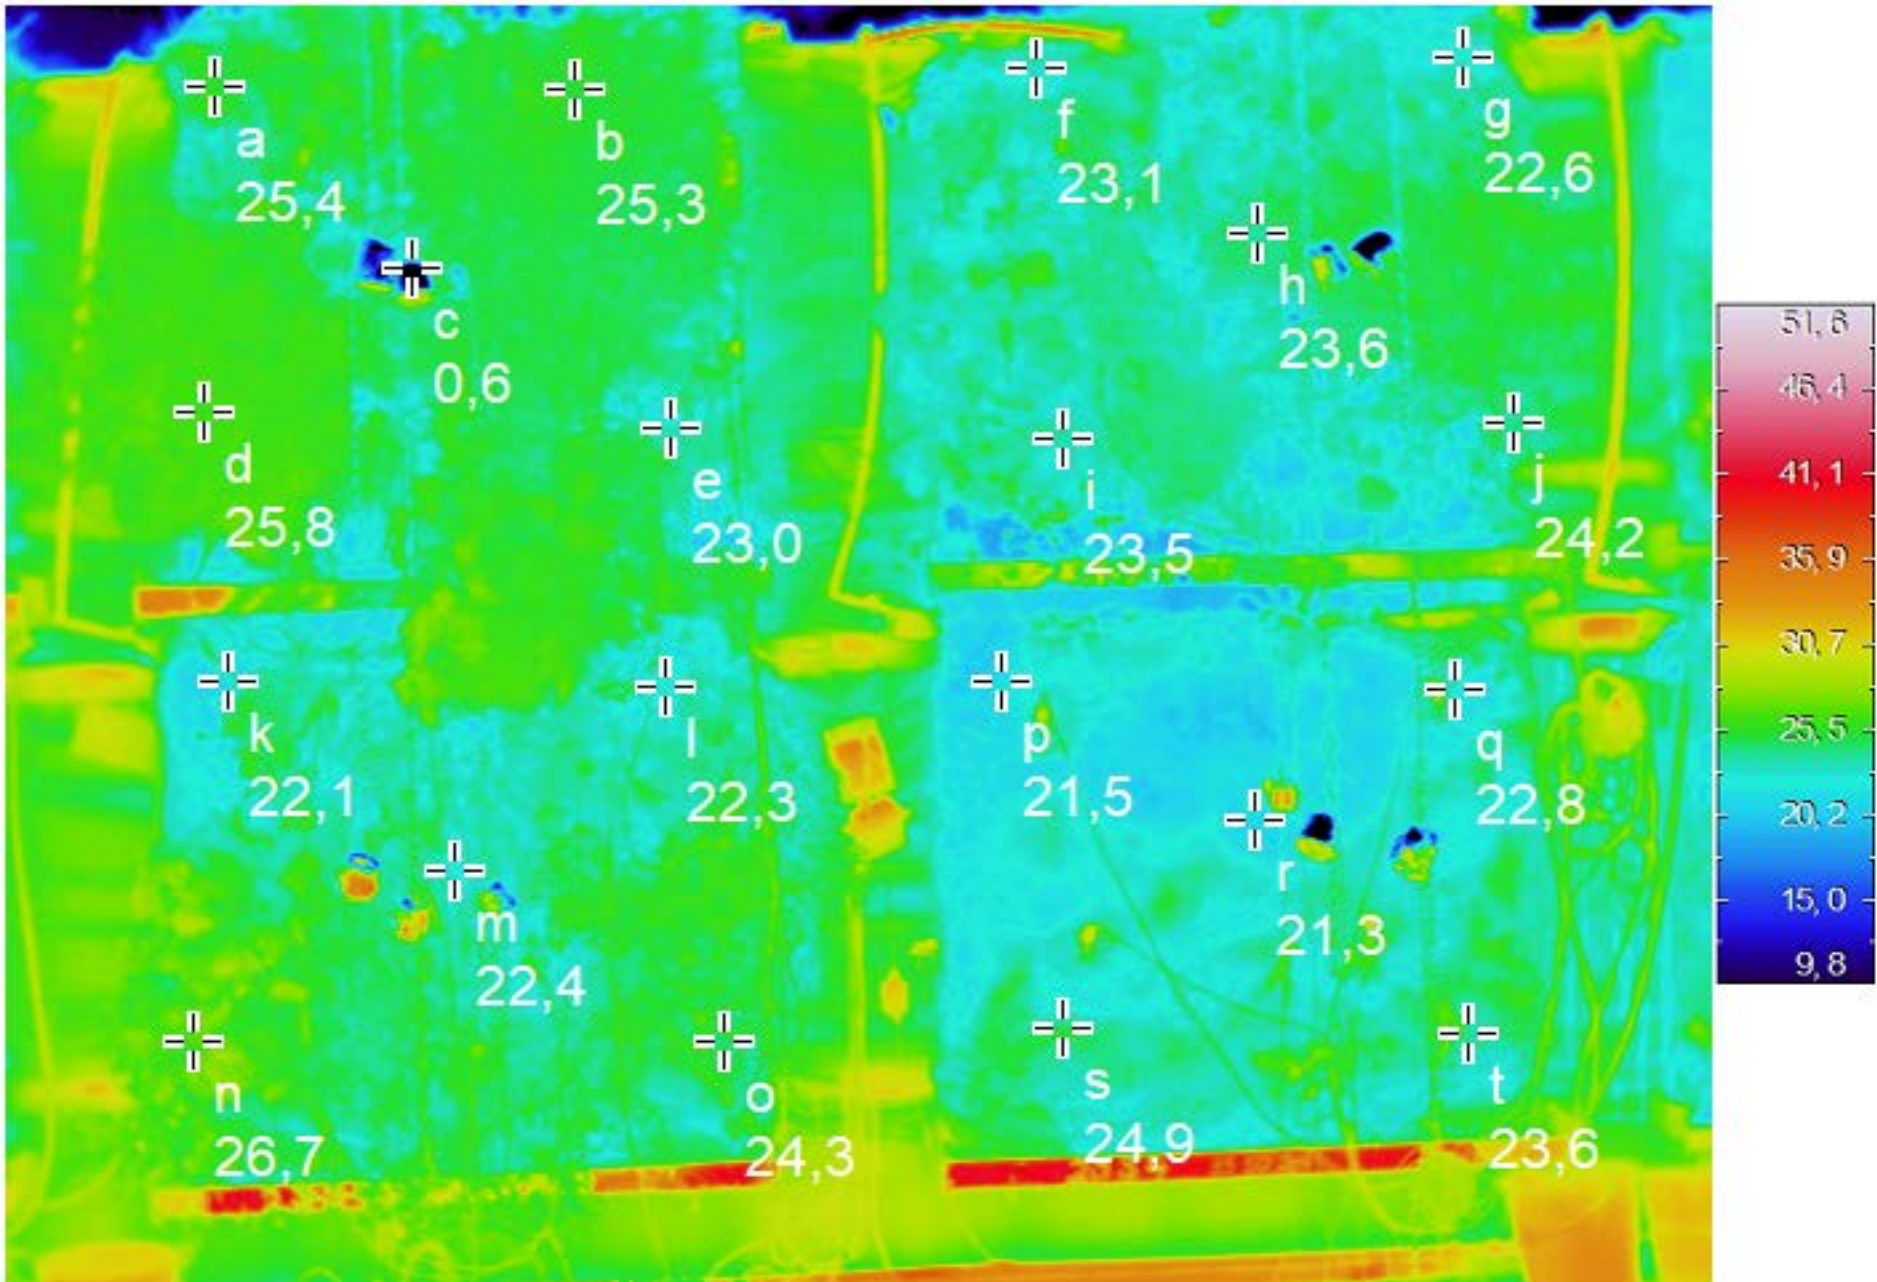

DateinameT02045IR.JPG  
Messtag:2019/06/18  
Messzeit:13:43:12  
Kommentar:  
Kameramodell:R500P  
Range:1[-20,0C-60,0C]  
BildmodusMEDx1,00  
Externes Objektiv:Standard  
Emissionsgrad:1.00  
Ambient Temp: 24,9IC  
IR Bildx1,00



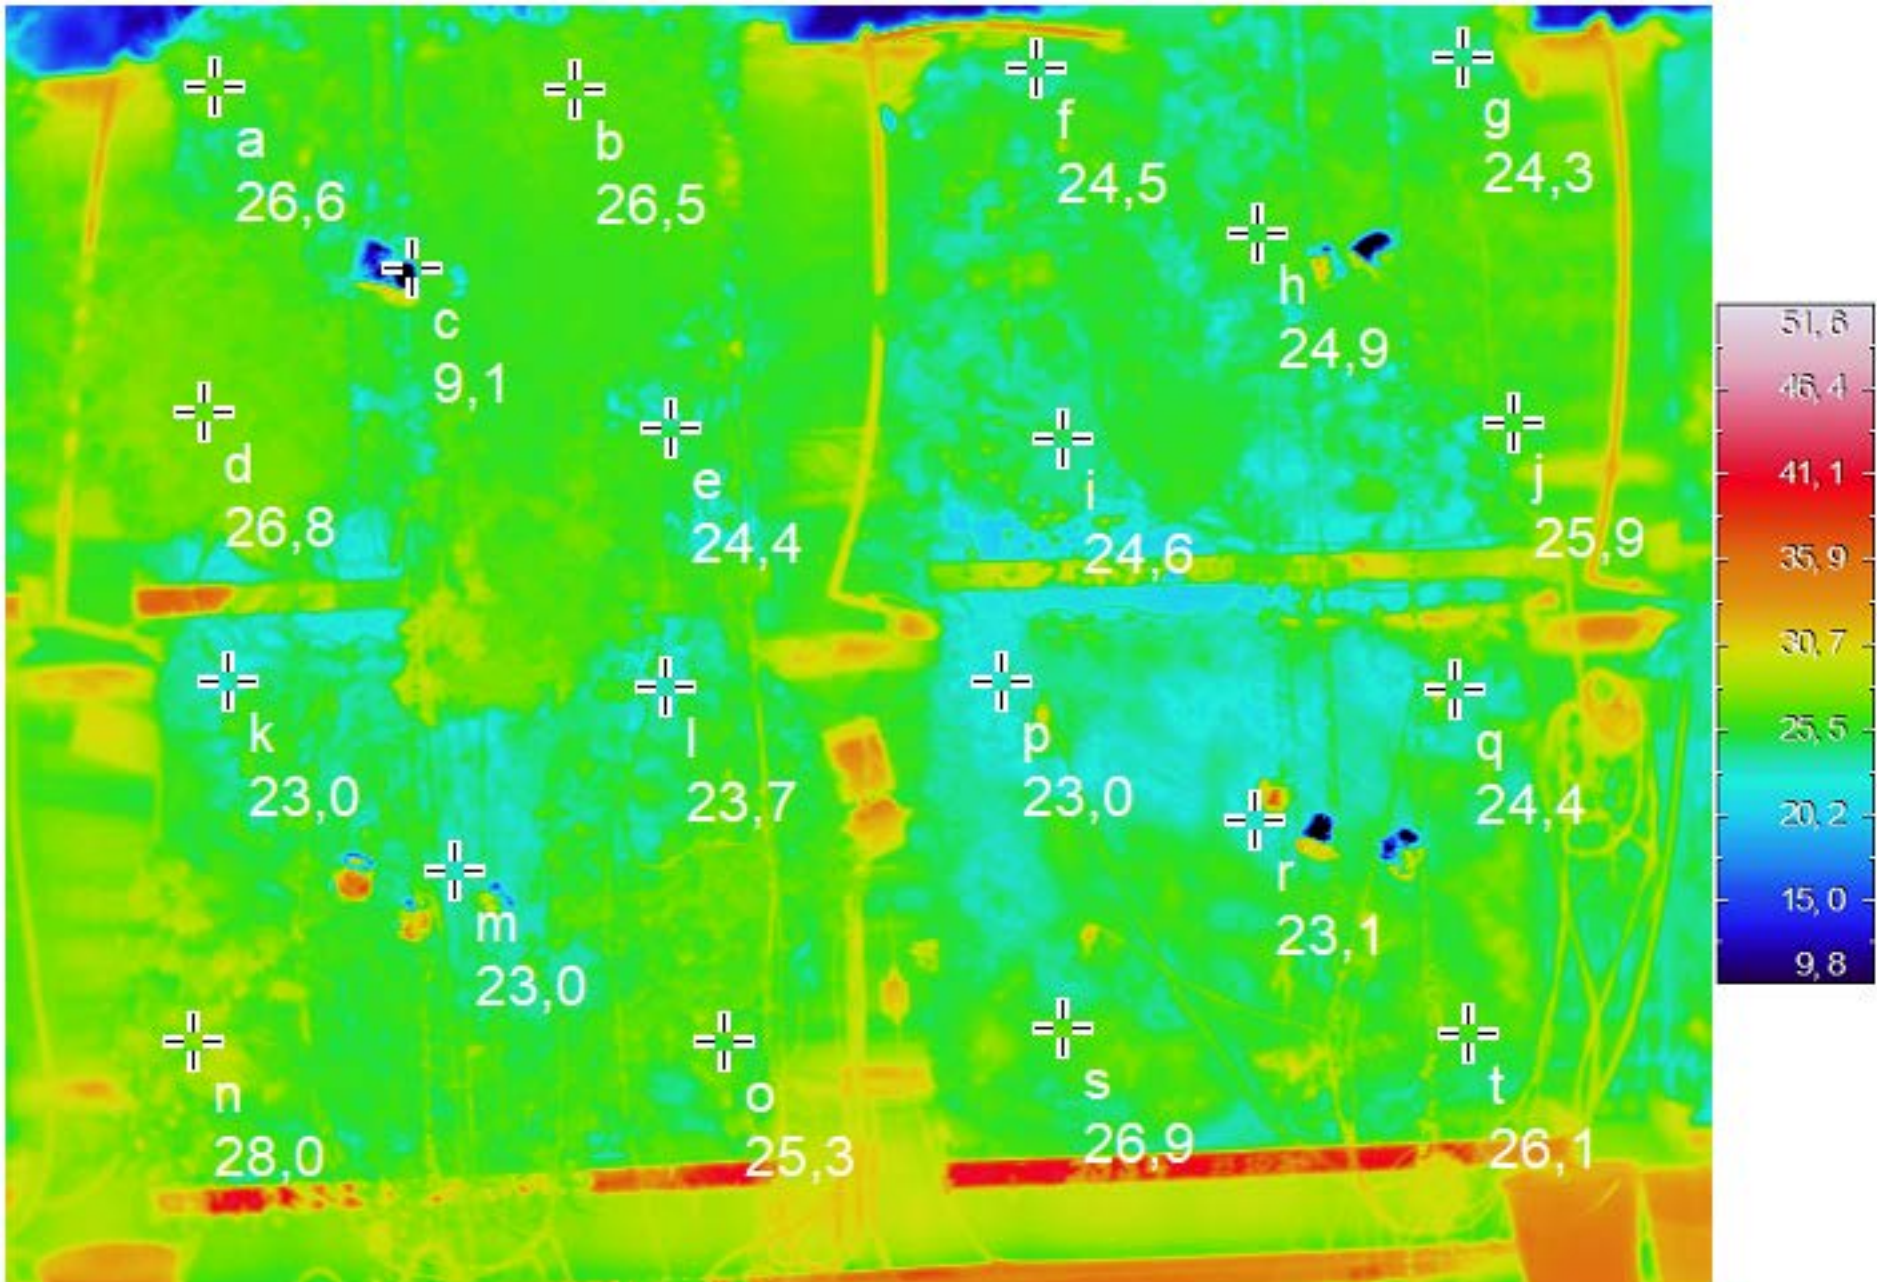

DateinameT02046IR.JPG  
Messtag:2019/06/18  
Messzeit:13:47:12  
Kommentar:  
Kameramodell:R500P  
Range:1[-20,0C-60,0C]  
BildmodusMEDx1,00  
Externes Objektiv:Standard  
Emissionsgrad:1.00  
Ambient Temp: 24,9IC  
IR Bildx1,00



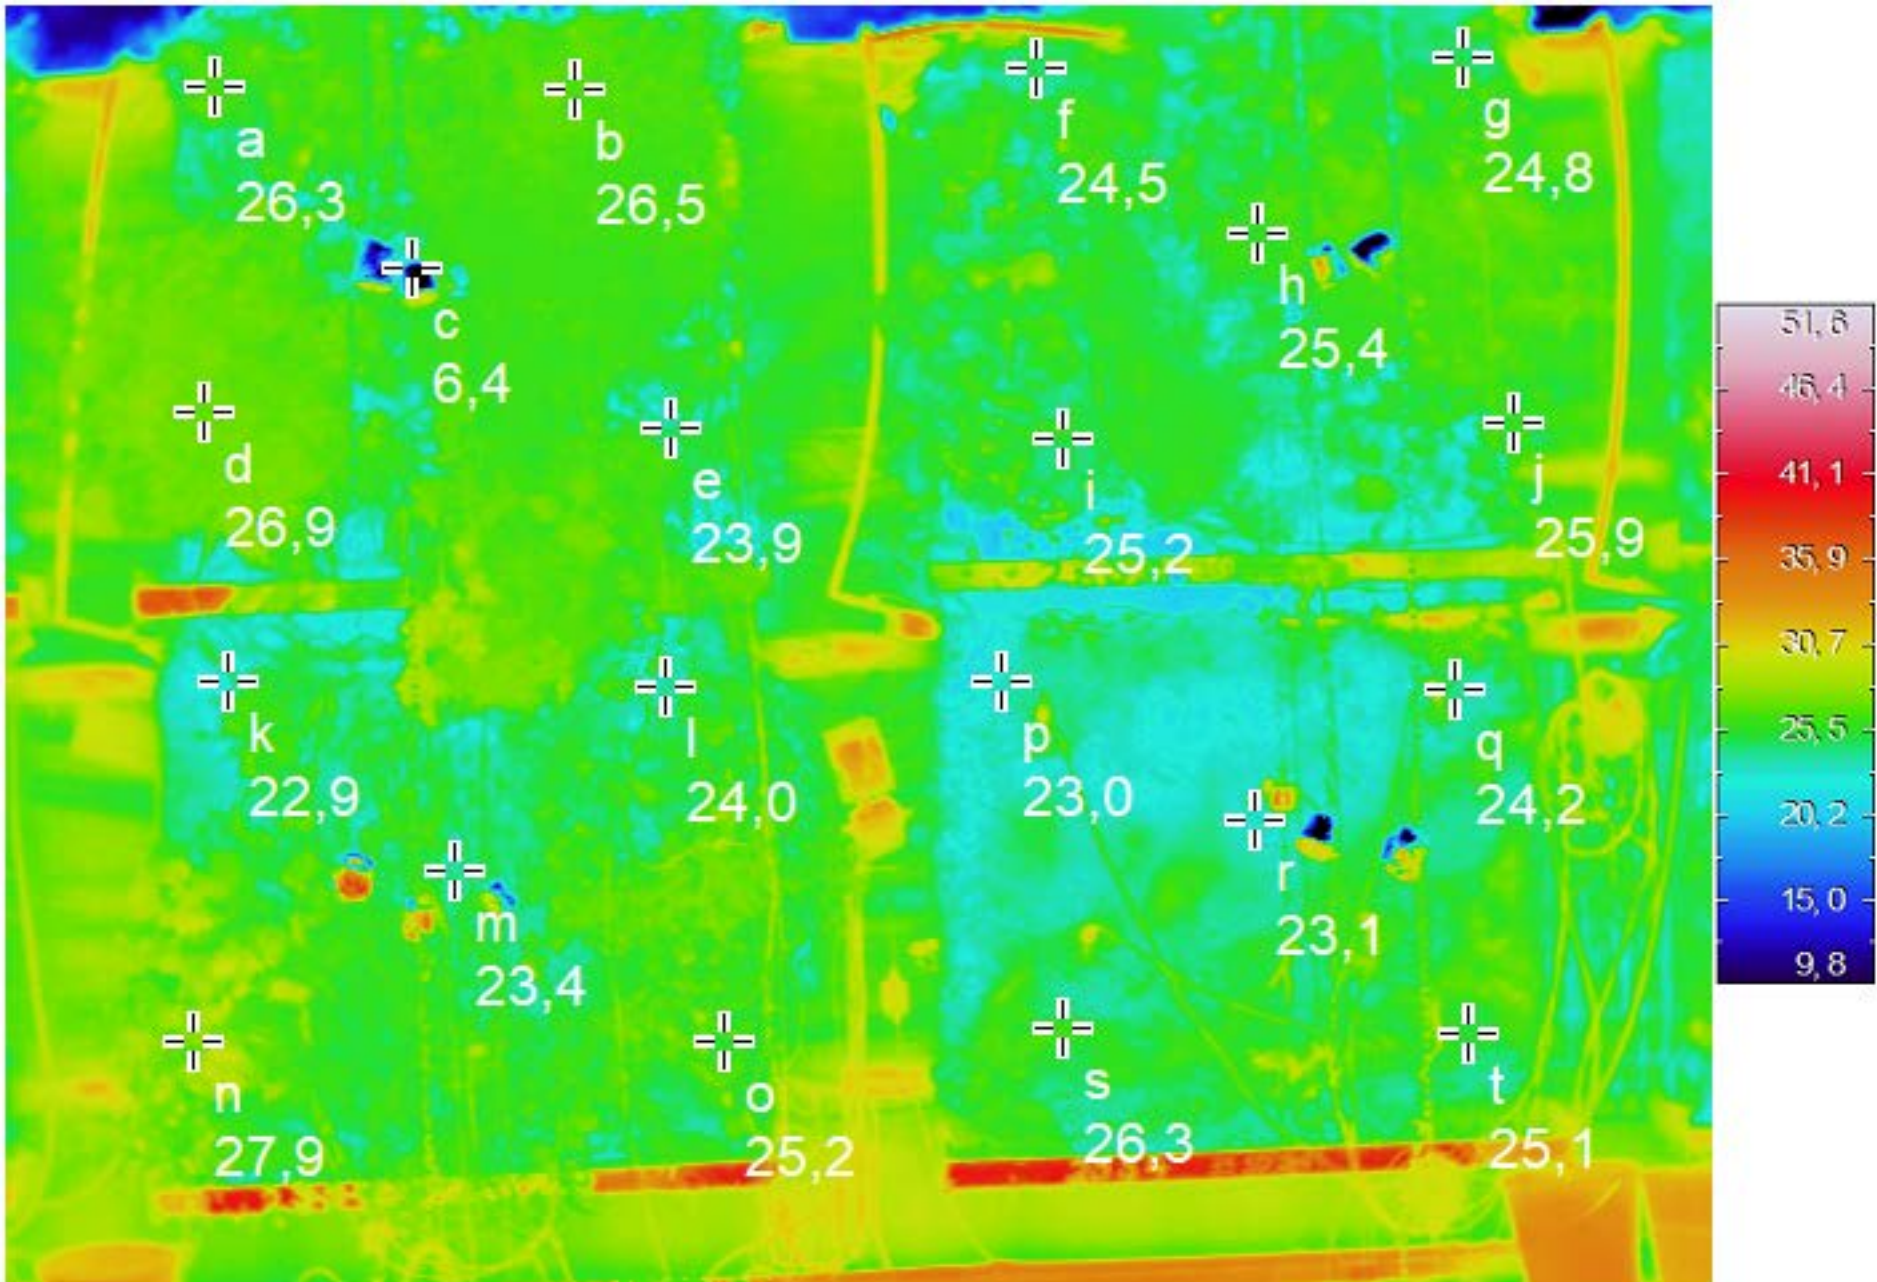

DateinameT02047IR.JPG  
Messtag:2019/06/18  
Messzeit:13:51:12  
Kommentar:  
Kameramodell:R500P  
Range:1[-20,0C-60,0C]  
BildmodusMEDx1,00  
Externes Objektiv:Standard  
Emissionsgrad:1.00  
Ambient Temp: 24,9IC  
IR Bildx1,00



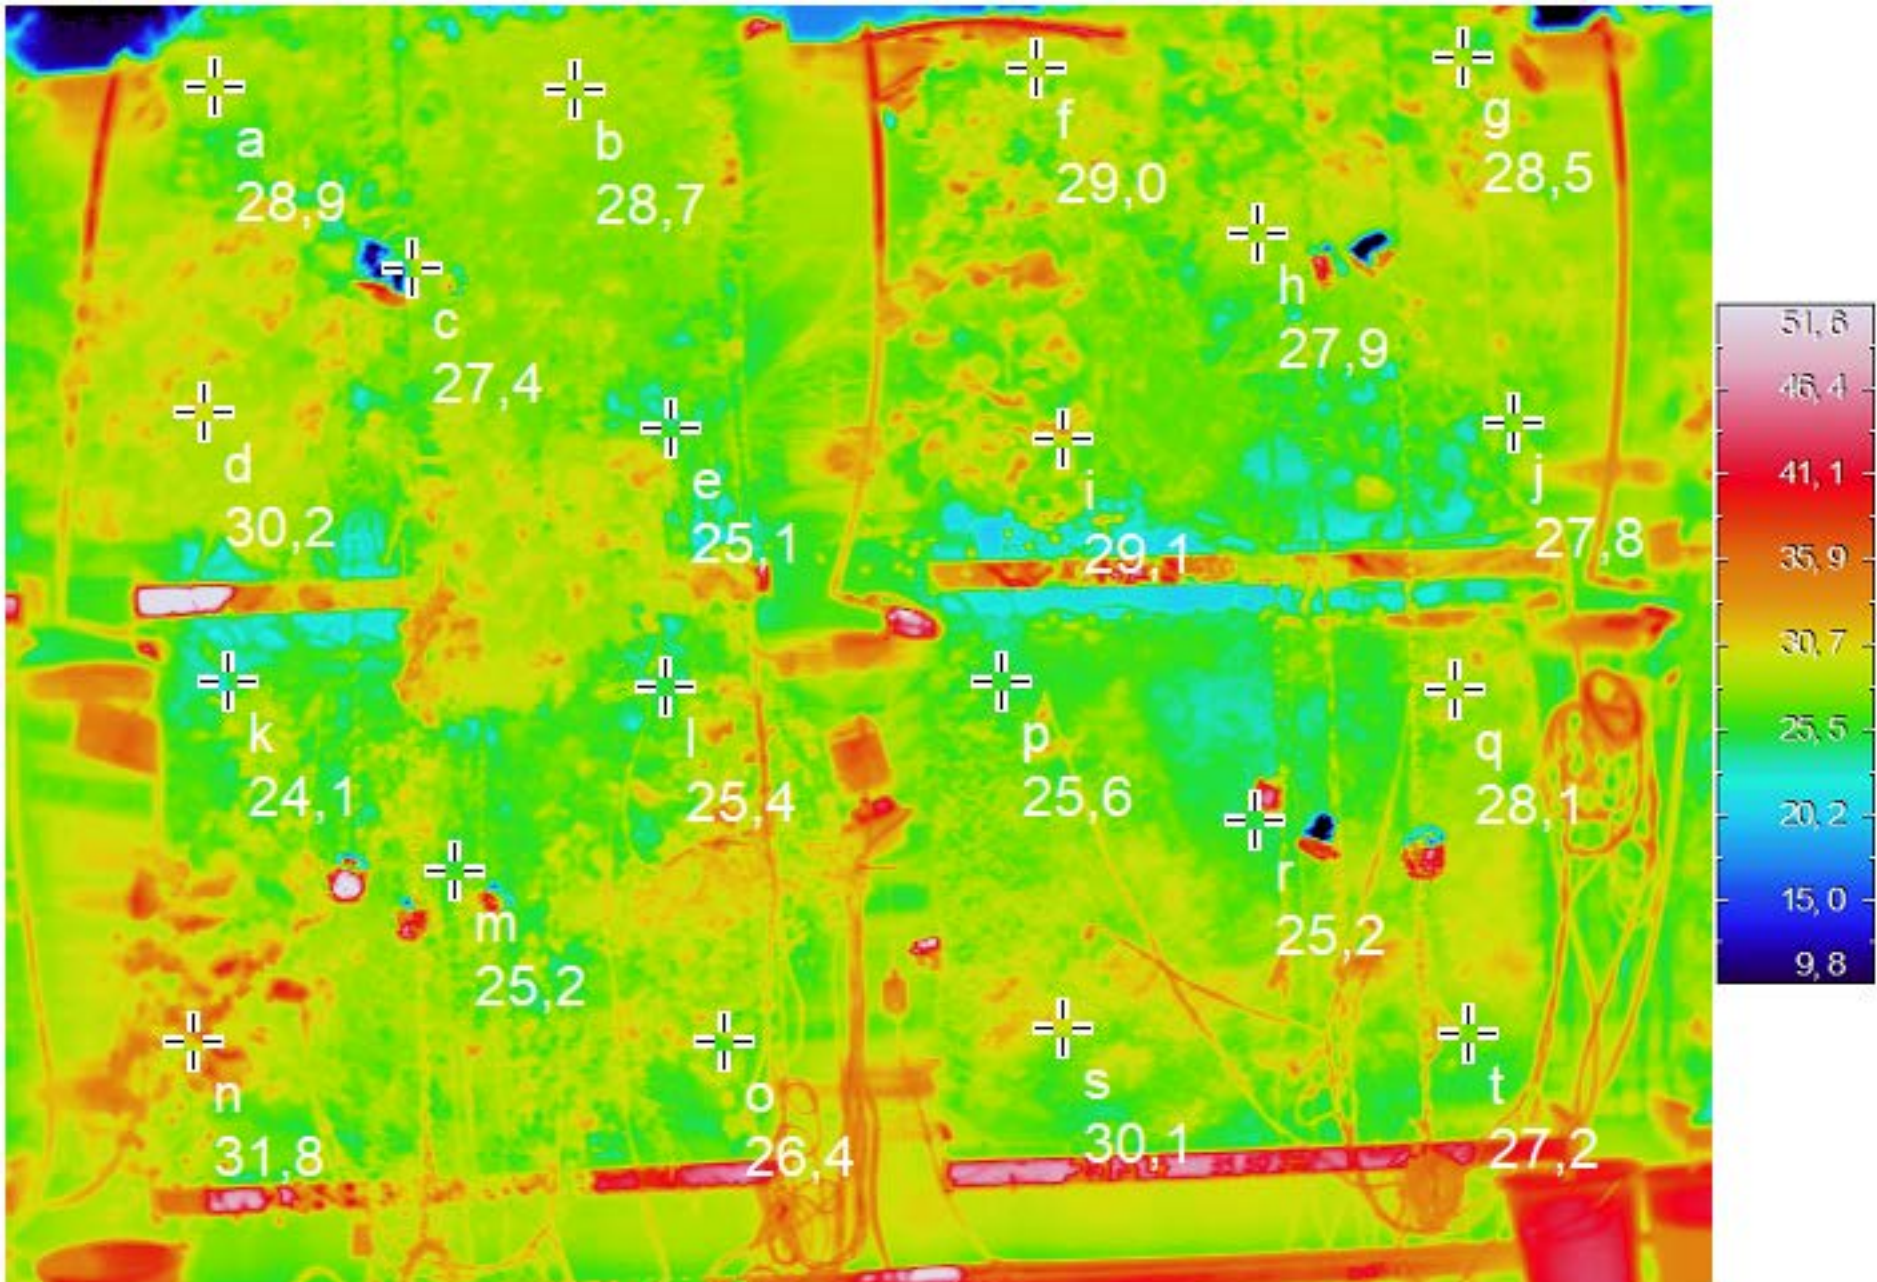

DateinameT02048IR.JPG  
Messtag:2019/06/18  
Messzeit:13:55:12  
Kommentar:  
Kameramodell:R500P  
Range:1[-20,0C-60,0C]  
BildmodusMEDx1,00  
Externes Objektiv:Standard  
Emissionsgrad:1.00  
Ambient Temp: 24,9IC  
IR Bildx1,00



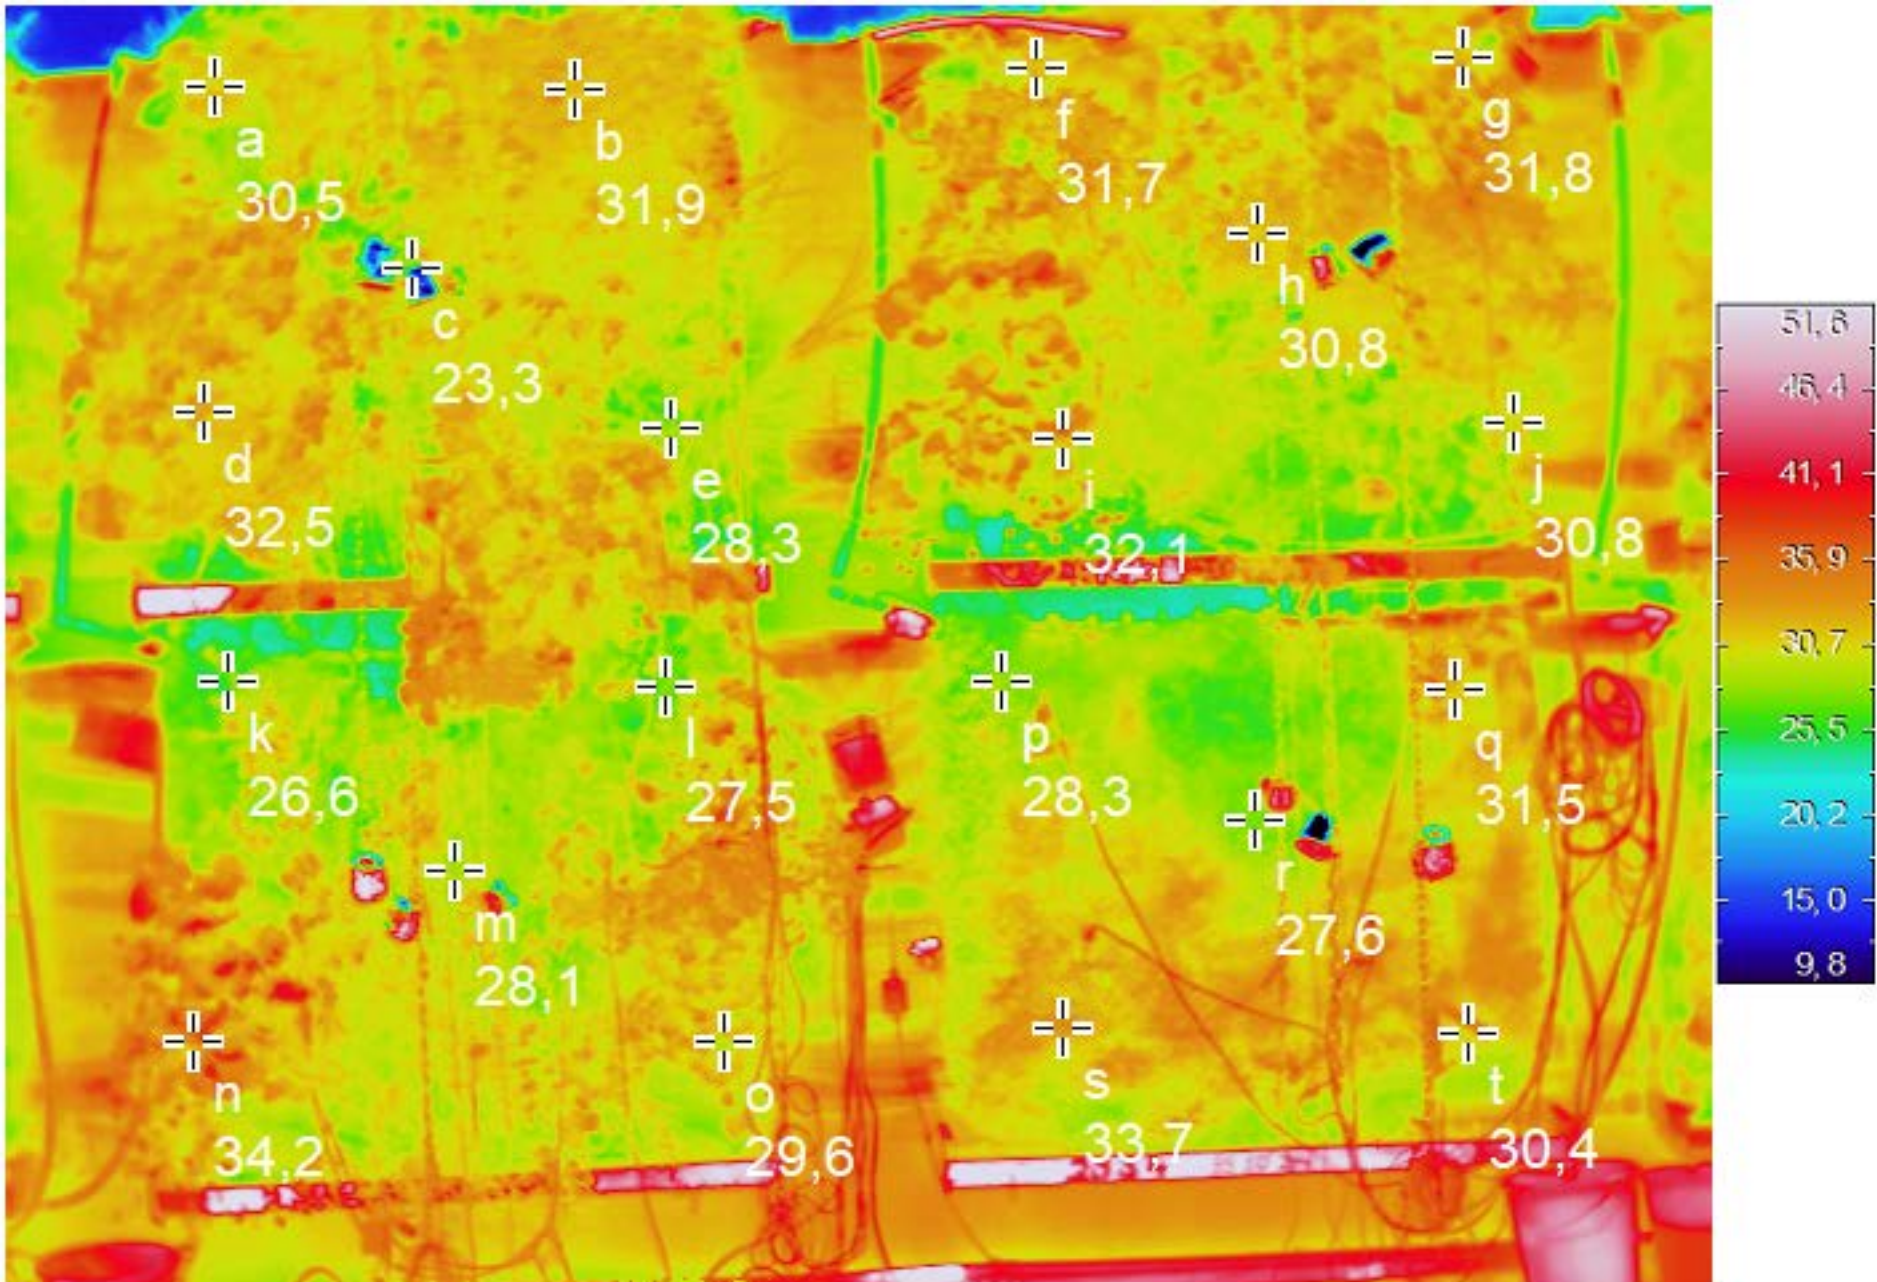

DateinameT02049IR.JPG  
Messtag:2019/06/18  
Messzeit:13:59:12  
Kommentar:  
Kameramodell:R500P  
Range:1[-20,0C-60,0C]  
BildmodusMEDx1,00  
Externes Objektiv:Standard  
Emissionsgrad:1.00  
Ambient Temp: 24,9IC  
IR Bildx1,00



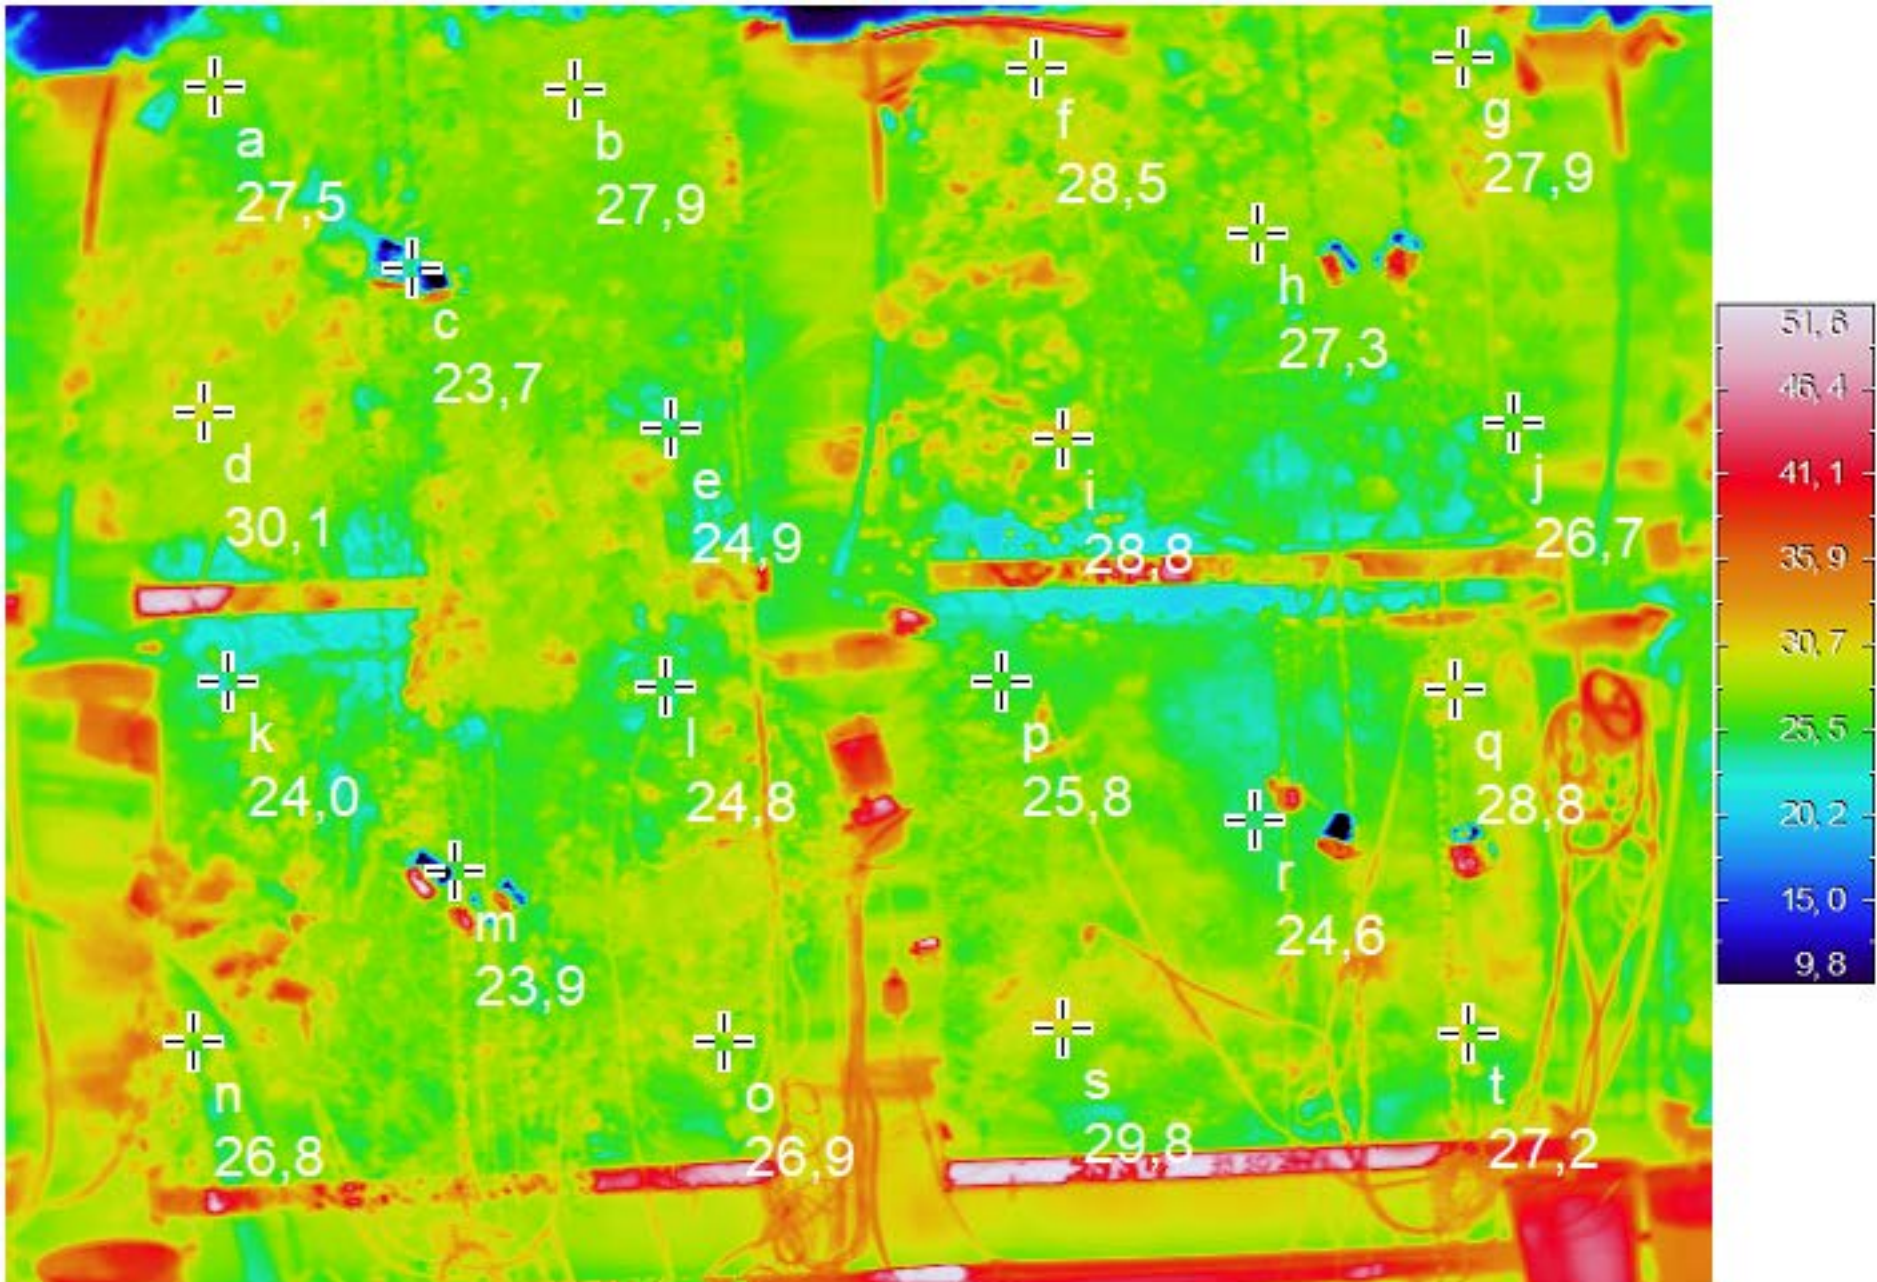

DateinameT02050IR.JPG  
Messtag:2019/06/18  
Messzeit:14:03:12  
Kommentar:  
Kameramodell:R500P  
Range:1[-20,0C-60,0C]  
BildmodusMEDx1,00  
Externes Objektiv:Standard  
Emissionsgrad:1.00  
Ambient Temp: 24,9IC  
IR Bildx1,00



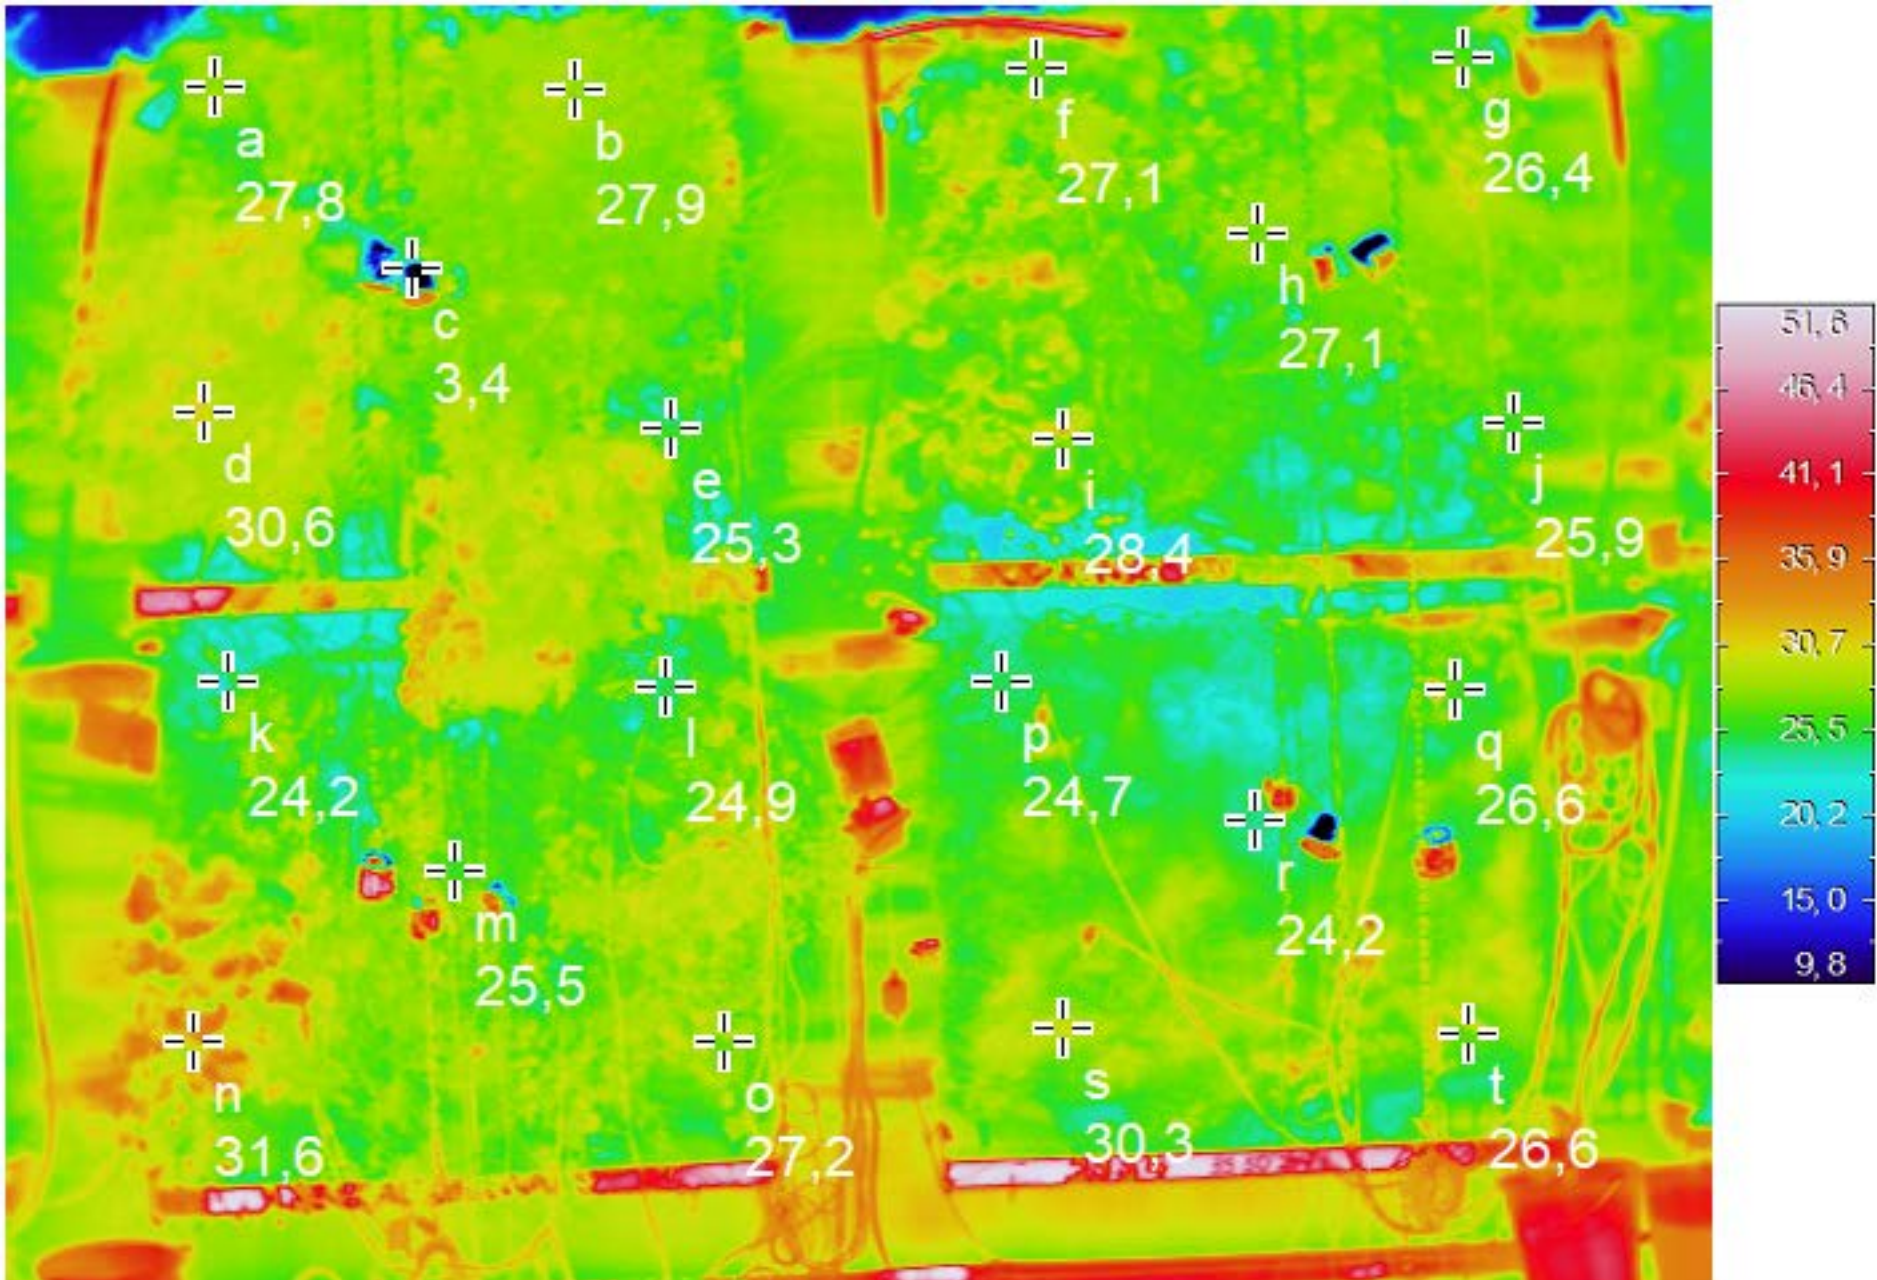

DateinameT02051IR.JPG  
Messtag:2019/06/18  
Messzeit:14:07:12  
Kommentar:  
Kameramodell:R500P  
Range:1[-20,0C-60,0C]  
BildmodusMEDx1,00  
Externes Objektiv:Standard  
Emissionsgrad:1.00  
Ambient Temp: 24,9IC  
IR Bildx1,00



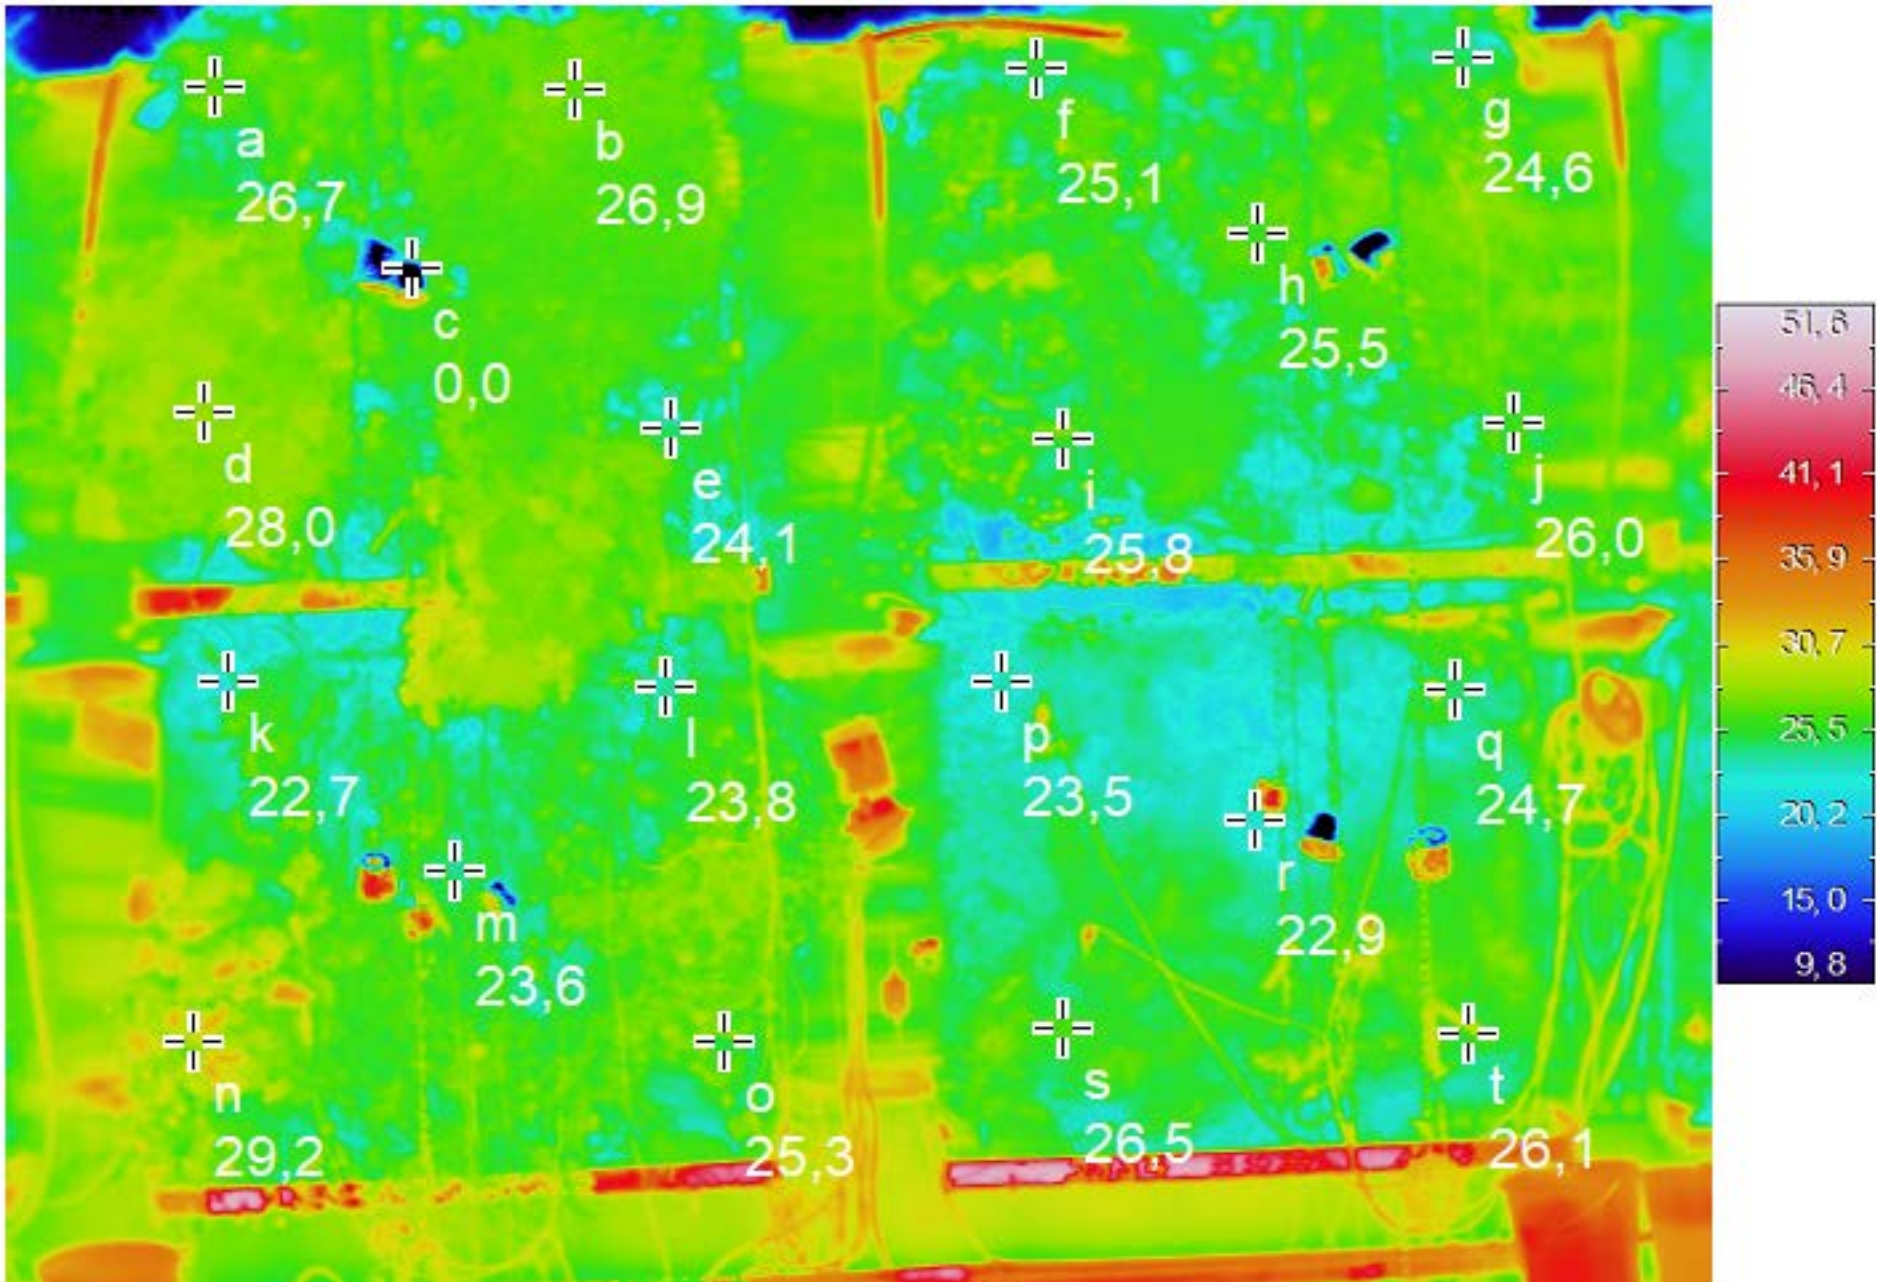

DateinameT02052IR.JPG  
Messtag:2019/06/18  
Messzeit:14:11:12  
Kommentar:  
Kameramodell:R500P  
Range:1[-20,0C-60,0C]  
BildmodusMEDx1,00  
Externes Objektiv:Standard  
Emissionsgrad:1.00  
Ambient Temp: 24,9IC  
IR Bildx1,00



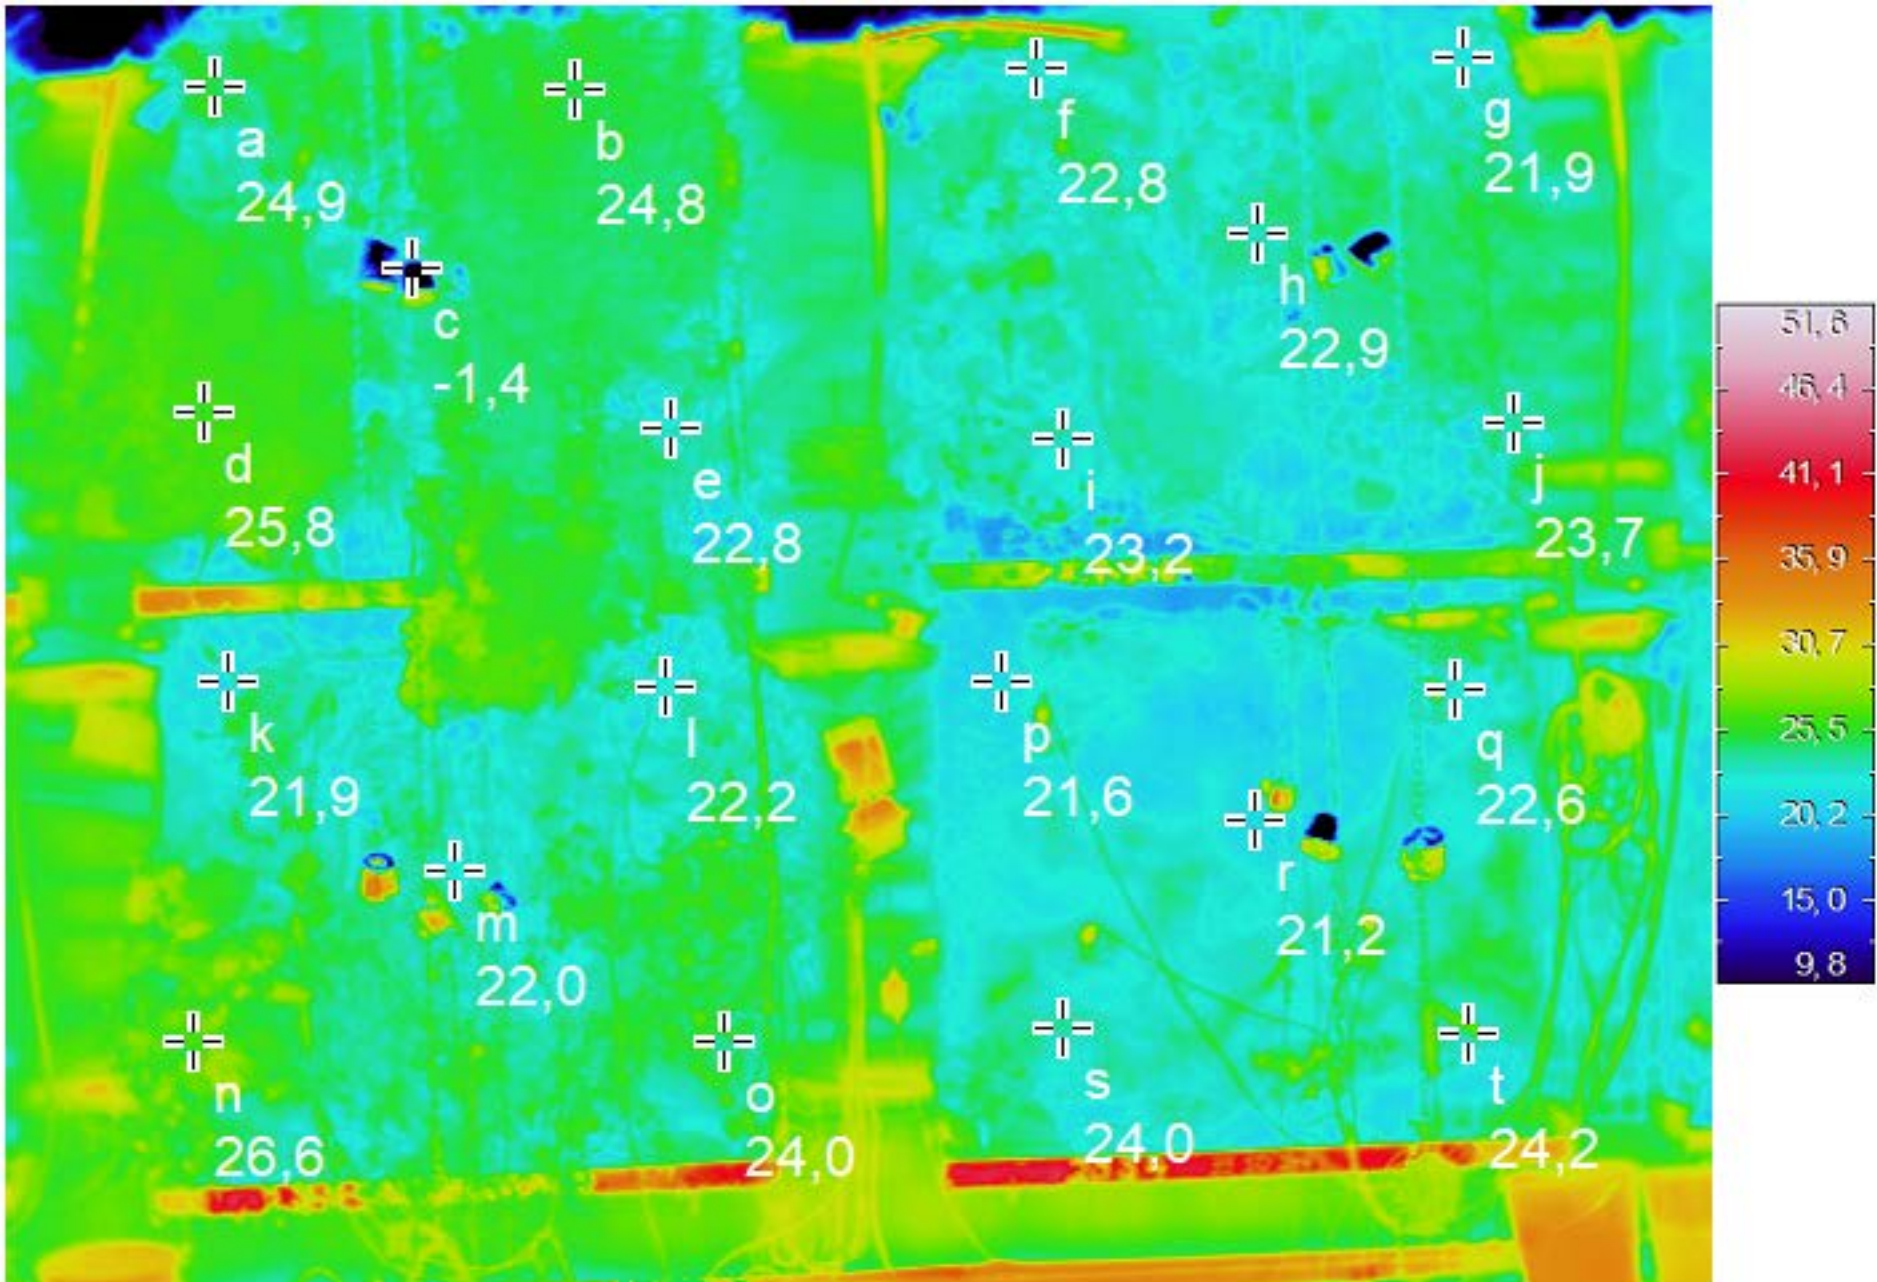

DateinameT02053IR.JPG  
Messtag:2019/06/18  
Messzeit:14:15:12  
Kommentar:  
Kameramodell:R500P  
Range:1[-20,0C-60,0C]  
BildmodusMEDx1,00  
Externes Objektiv:Standard  
Emissionsgrad:1.00  
Ambient Temp: 24,9IC  
IR Bildx1,00



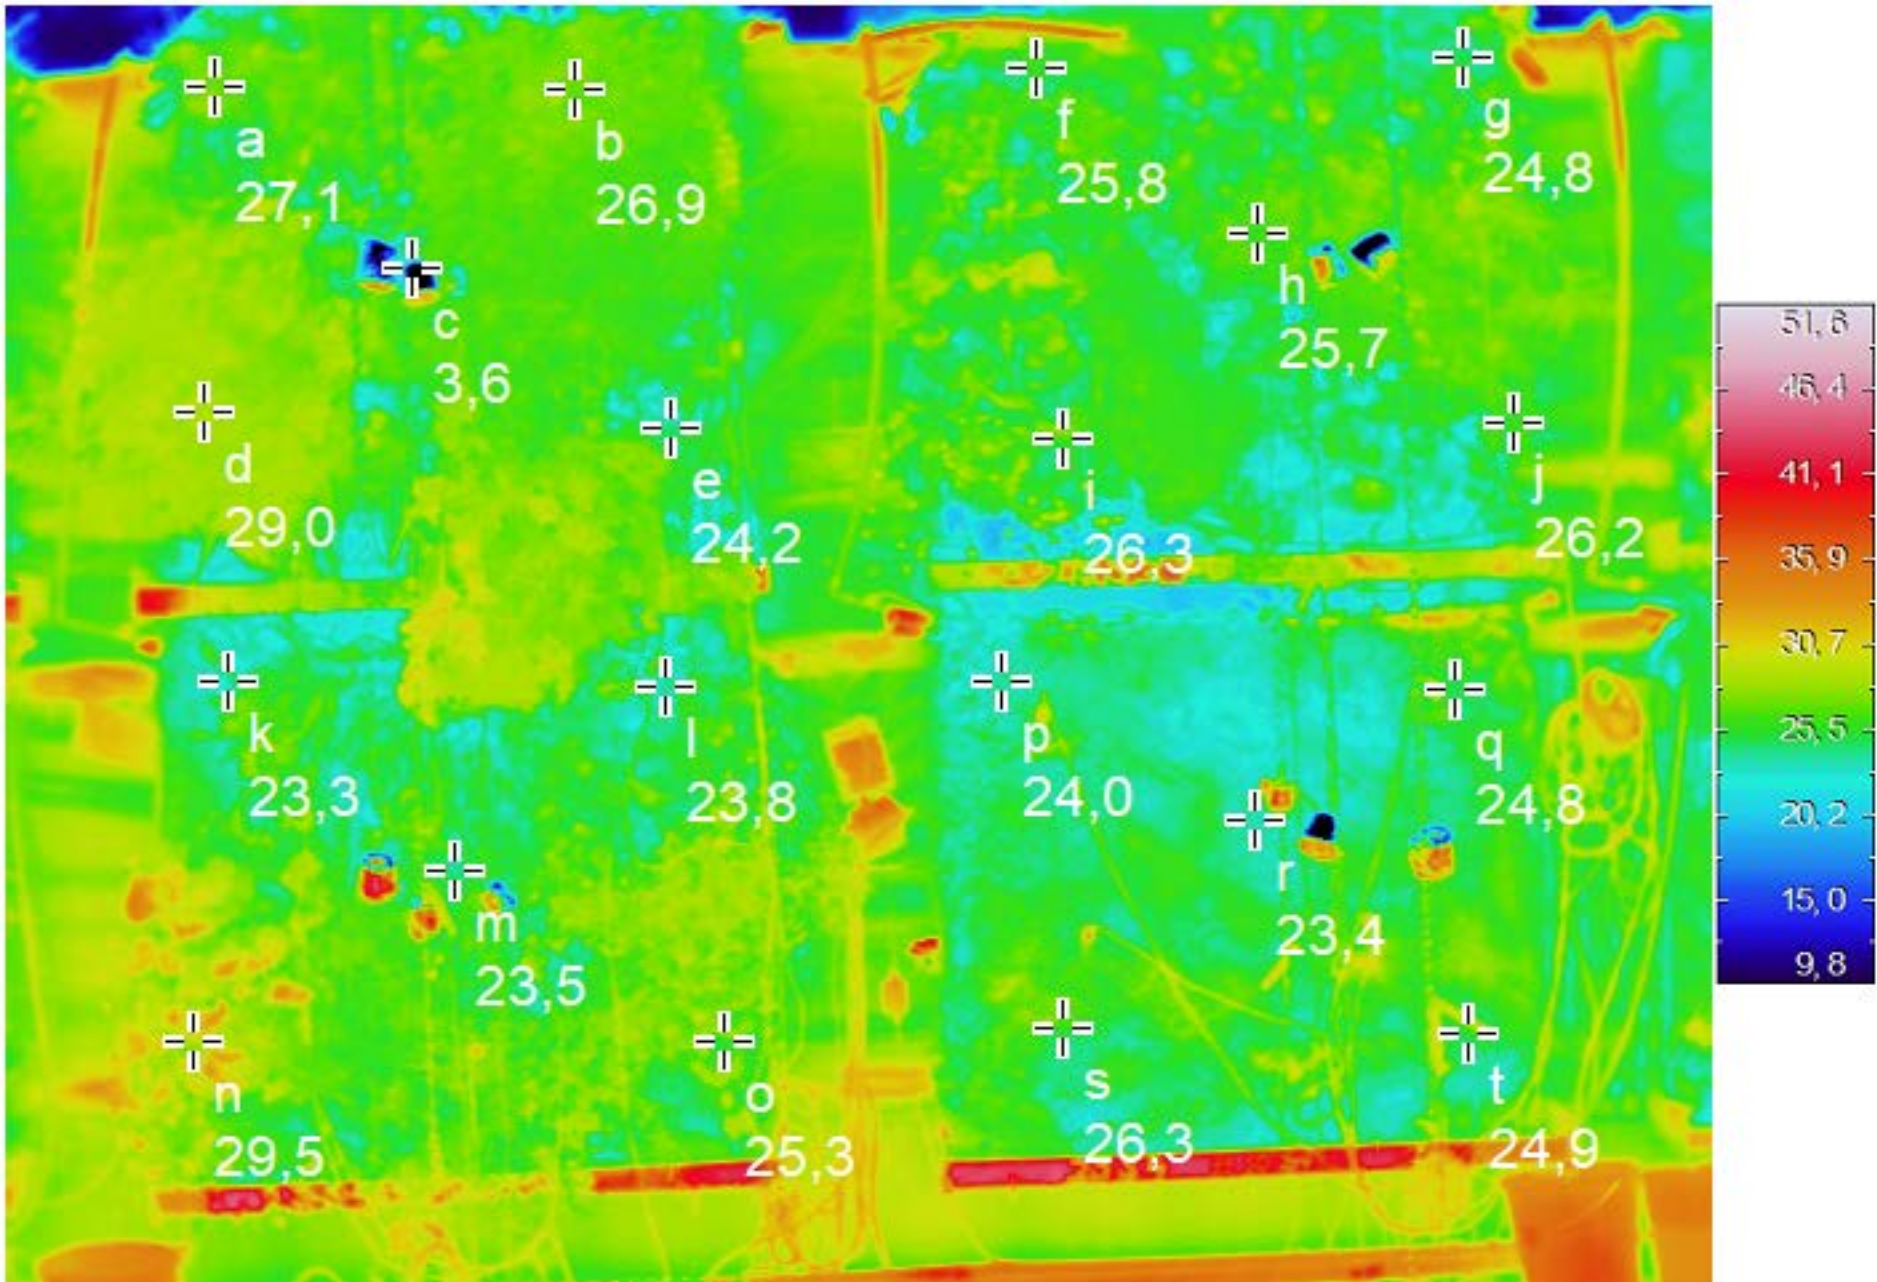

DateinameT02054IR.JPG  
Messtag:2019/06/18  
Messzeit:14:19:12  
Kommentar:  
Kameramodell:R500P  
Range:1[-20,0C-60,0C]  
BildmodusMEDx1,00  
Externes Objektiv:Standard  
Emissionsgrad:1.00  
Ambient Temp: 24,9IC  
IR Bildx1,00



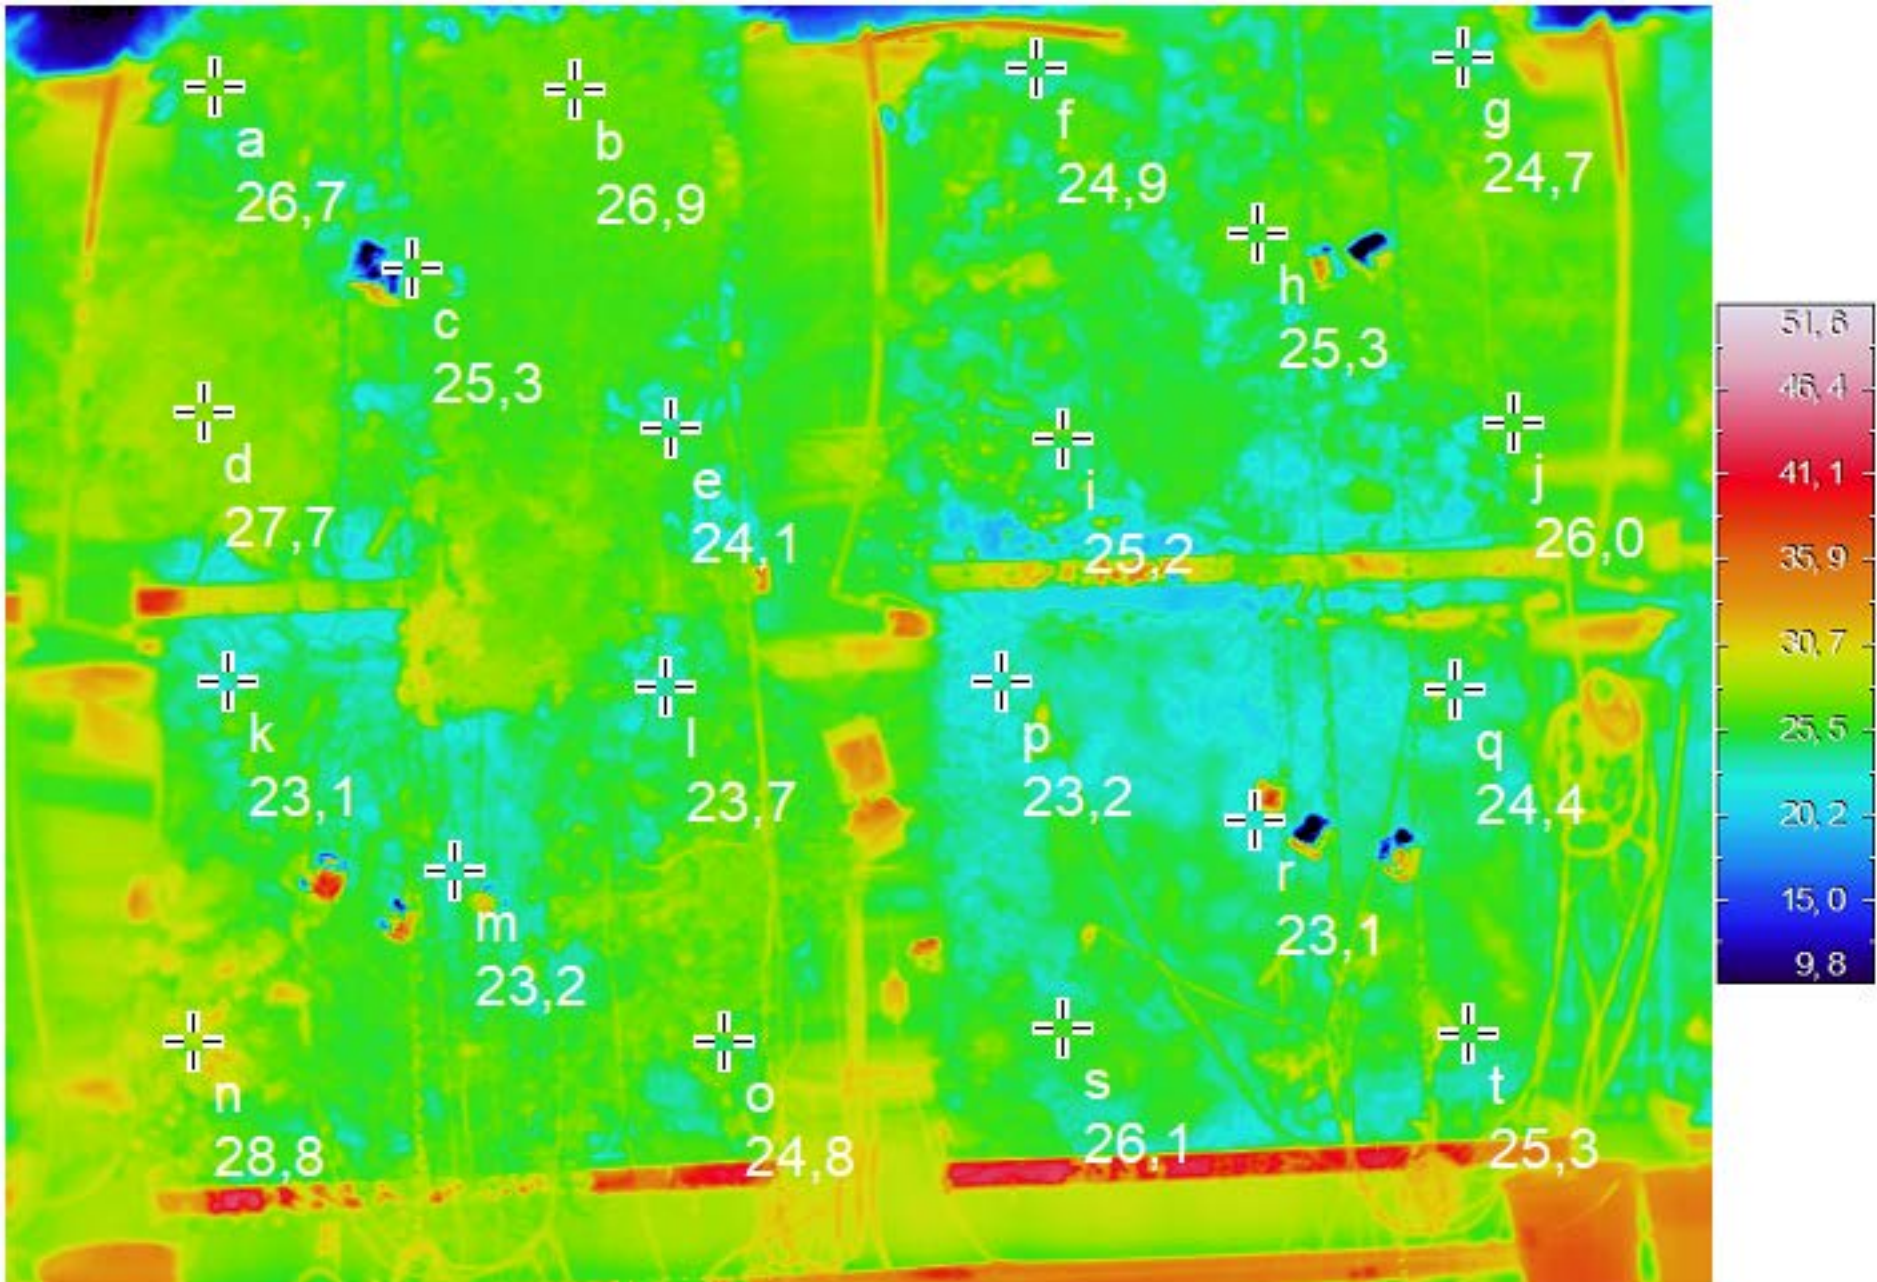

DateinameT02055IR.JPG  
Messtag:2019/06/18  
Messzeit:14:23:12  
Kommentar:  
Kameramodell:R500P  
Range:1[-20,0C-60,0C]  
BildmodusMEDx1,00  
Externes Objektiv:Standard  
Emissionsgrad:1.00  
Ambient Temp: 24,9IC  
IR Bildx1,00



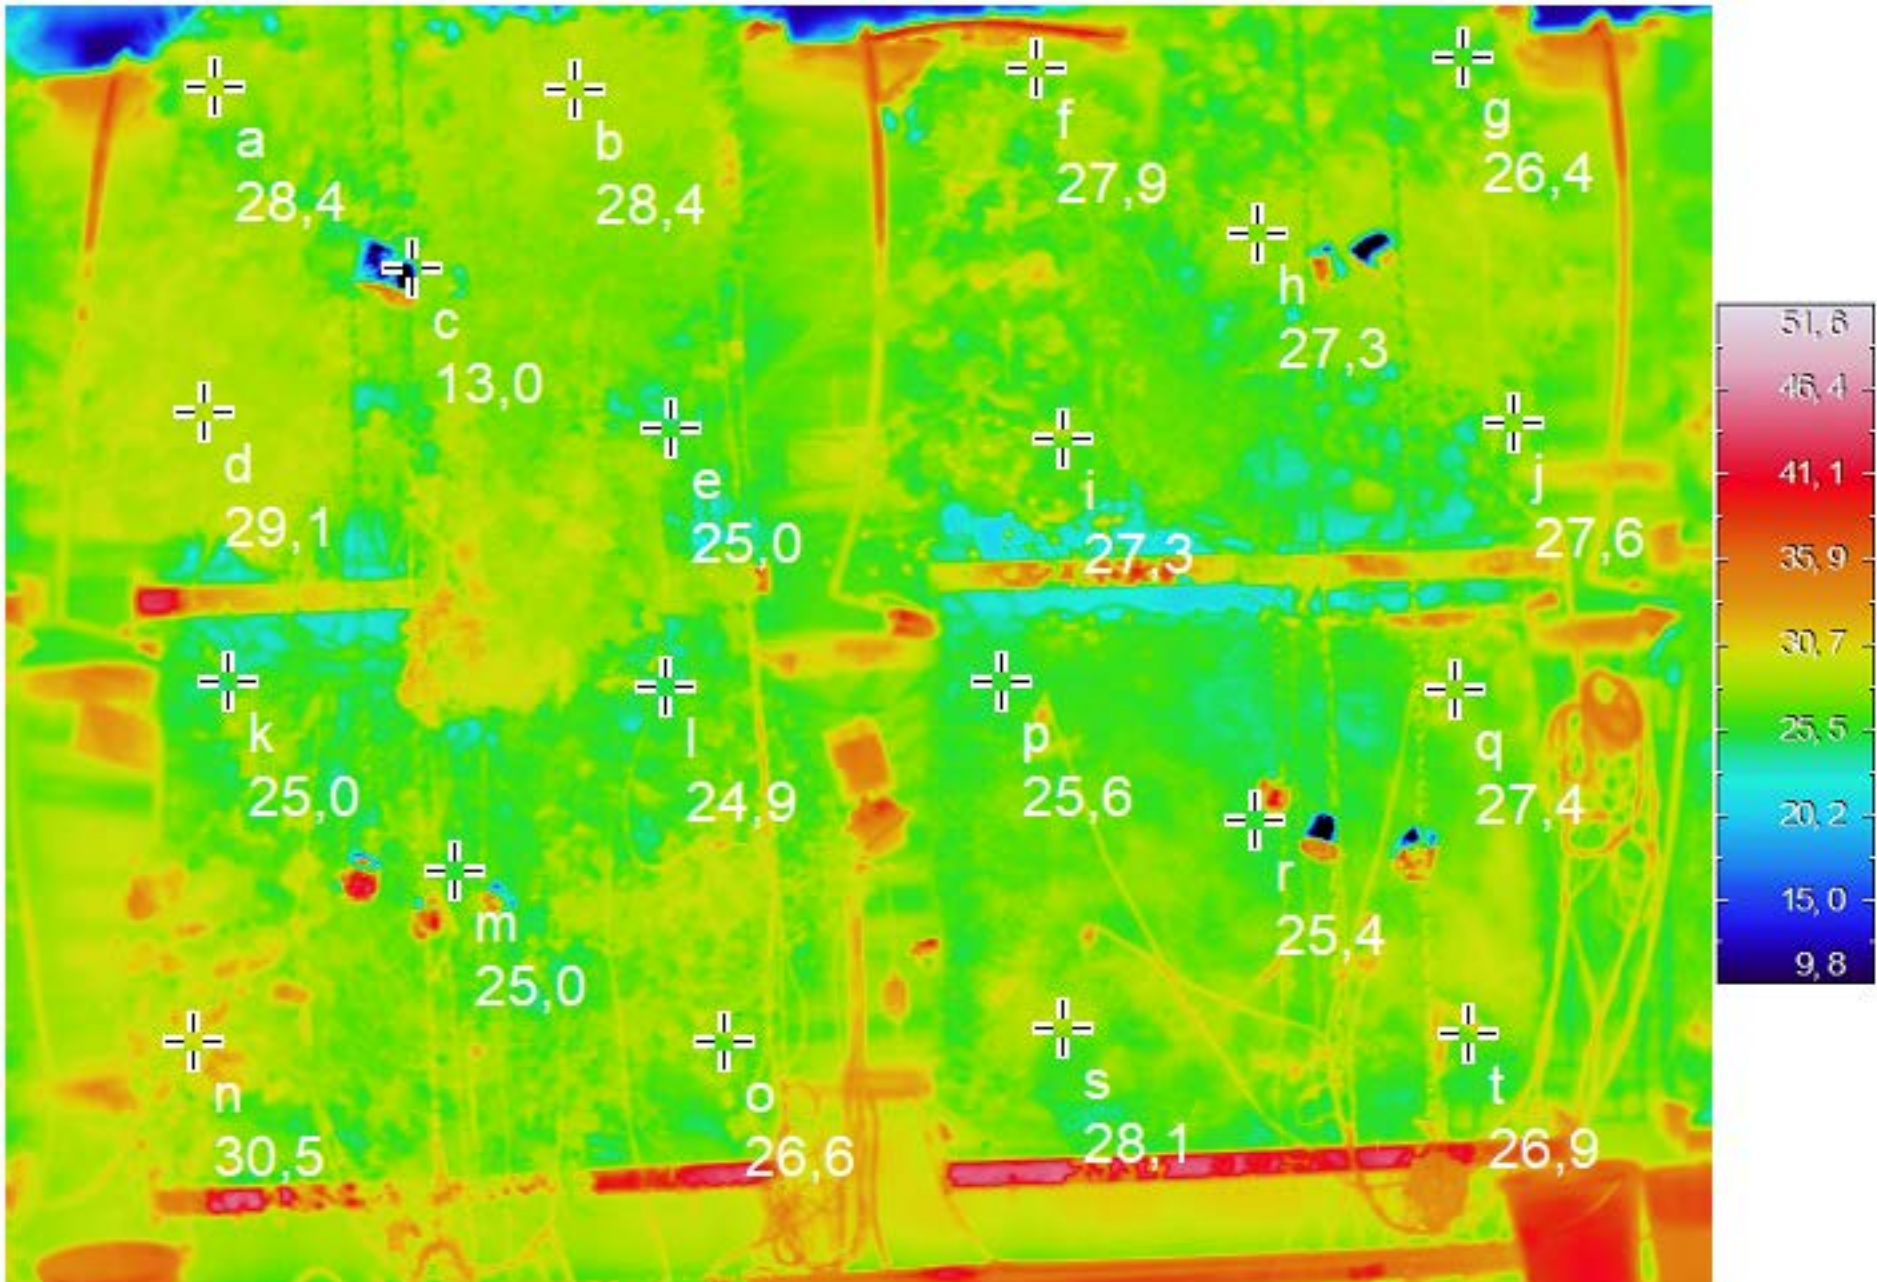

DateinameT02056IR.JPG  
Messtag:2019/06/18  
Messzeit:14:27:12  
Kommentar:  
Kameramodell:R500P  
Range:1[-20,0C-60,0C]  
BildmodusMEDx1,00  
Externes Objektiv:Standard  
Emissionsgrad:1.00  
Ambient Temp: 24,9IC  
IR Bildx1,00



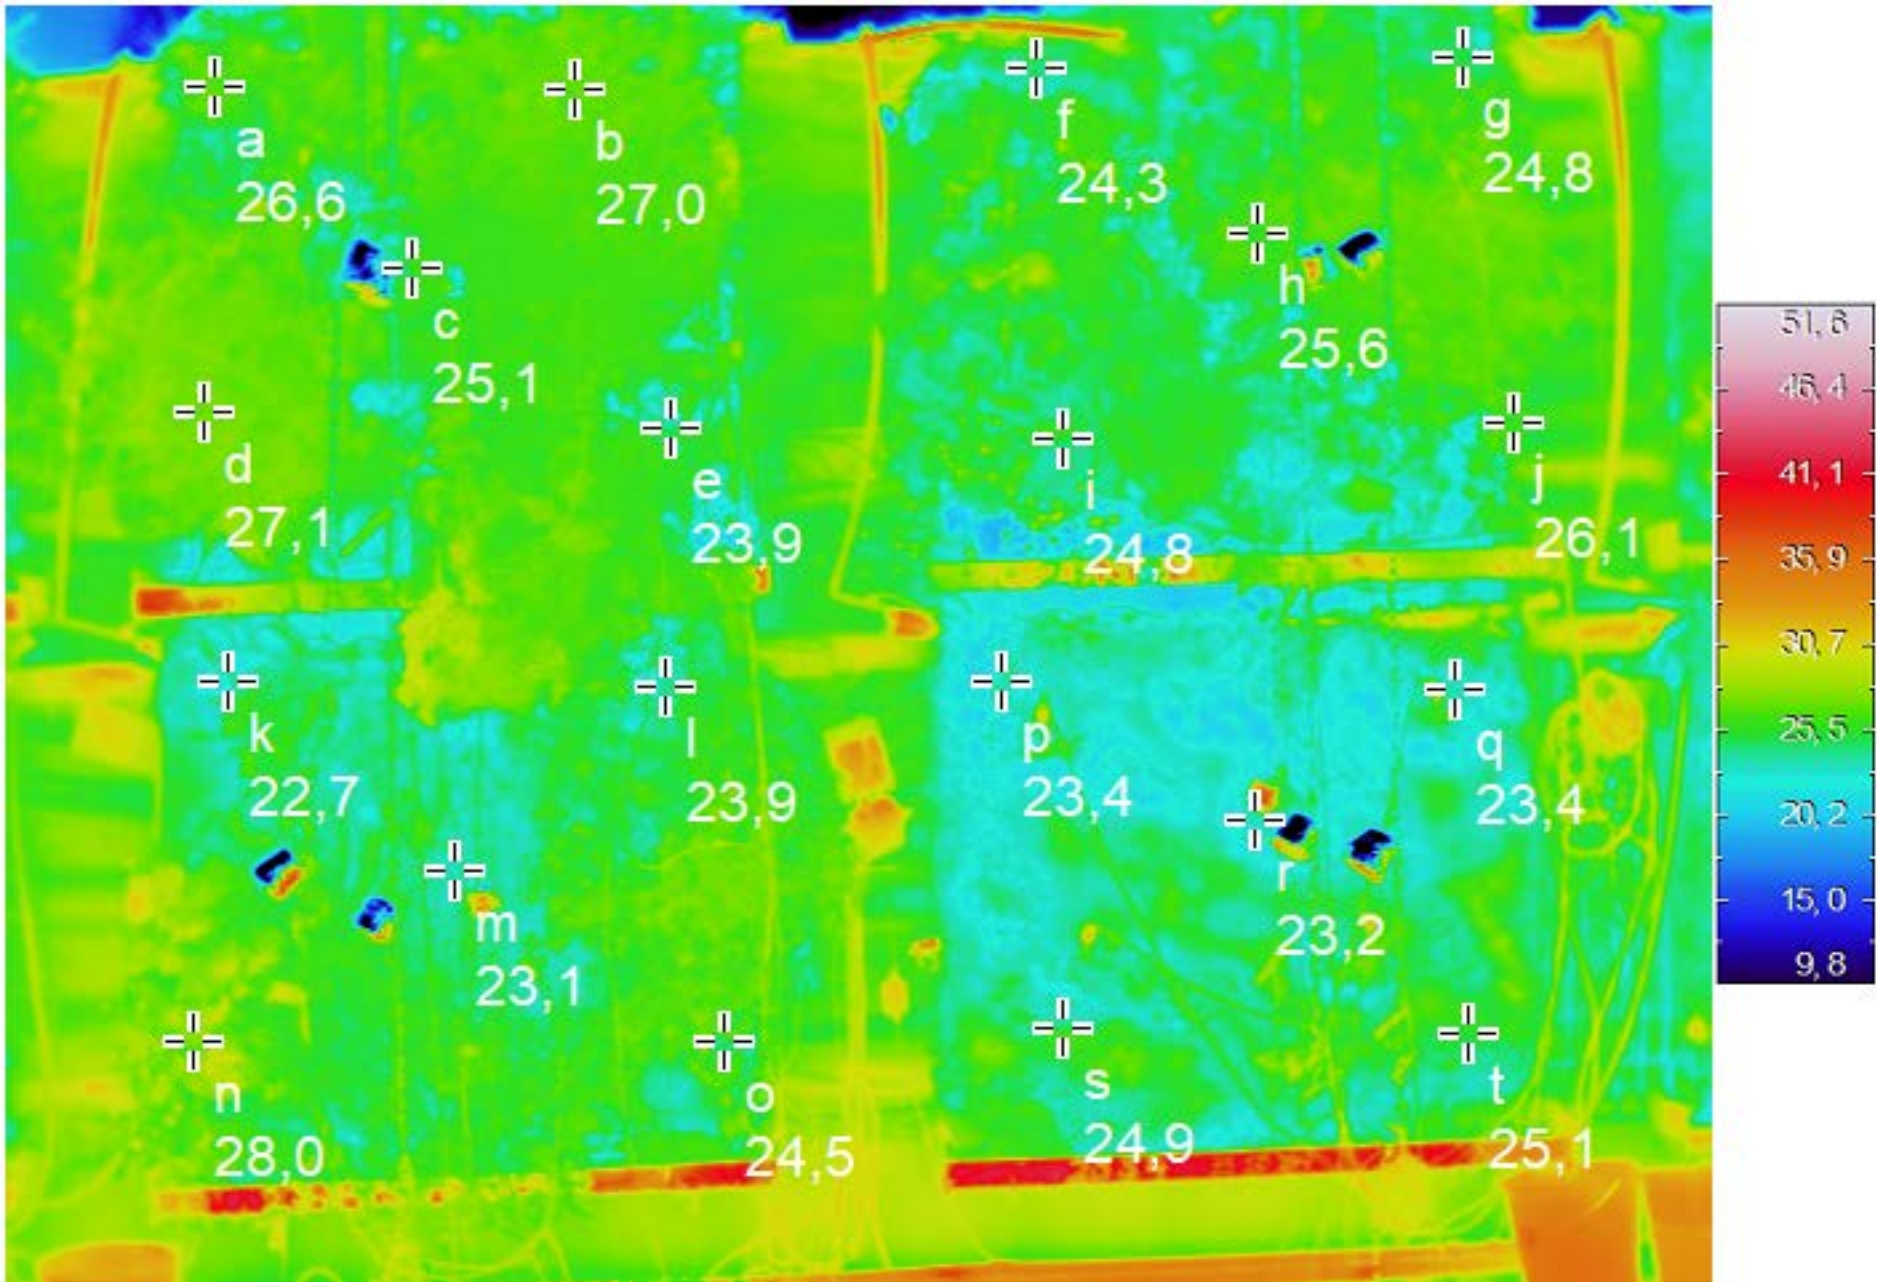

DateinameT02057IR.JPG  
Messtag:2019/06/18  
Messzeit:14:31:12  
Kommentar:  
Kameramodell:R500P  
Range:1[-20,0C-60,0C]  
BildmodusMEDx1,00  
Externes Objektiv:Standard  
Emissionsgrad:1.00  
Ambient Temp: 24,9IC  
IR Bildx1,00



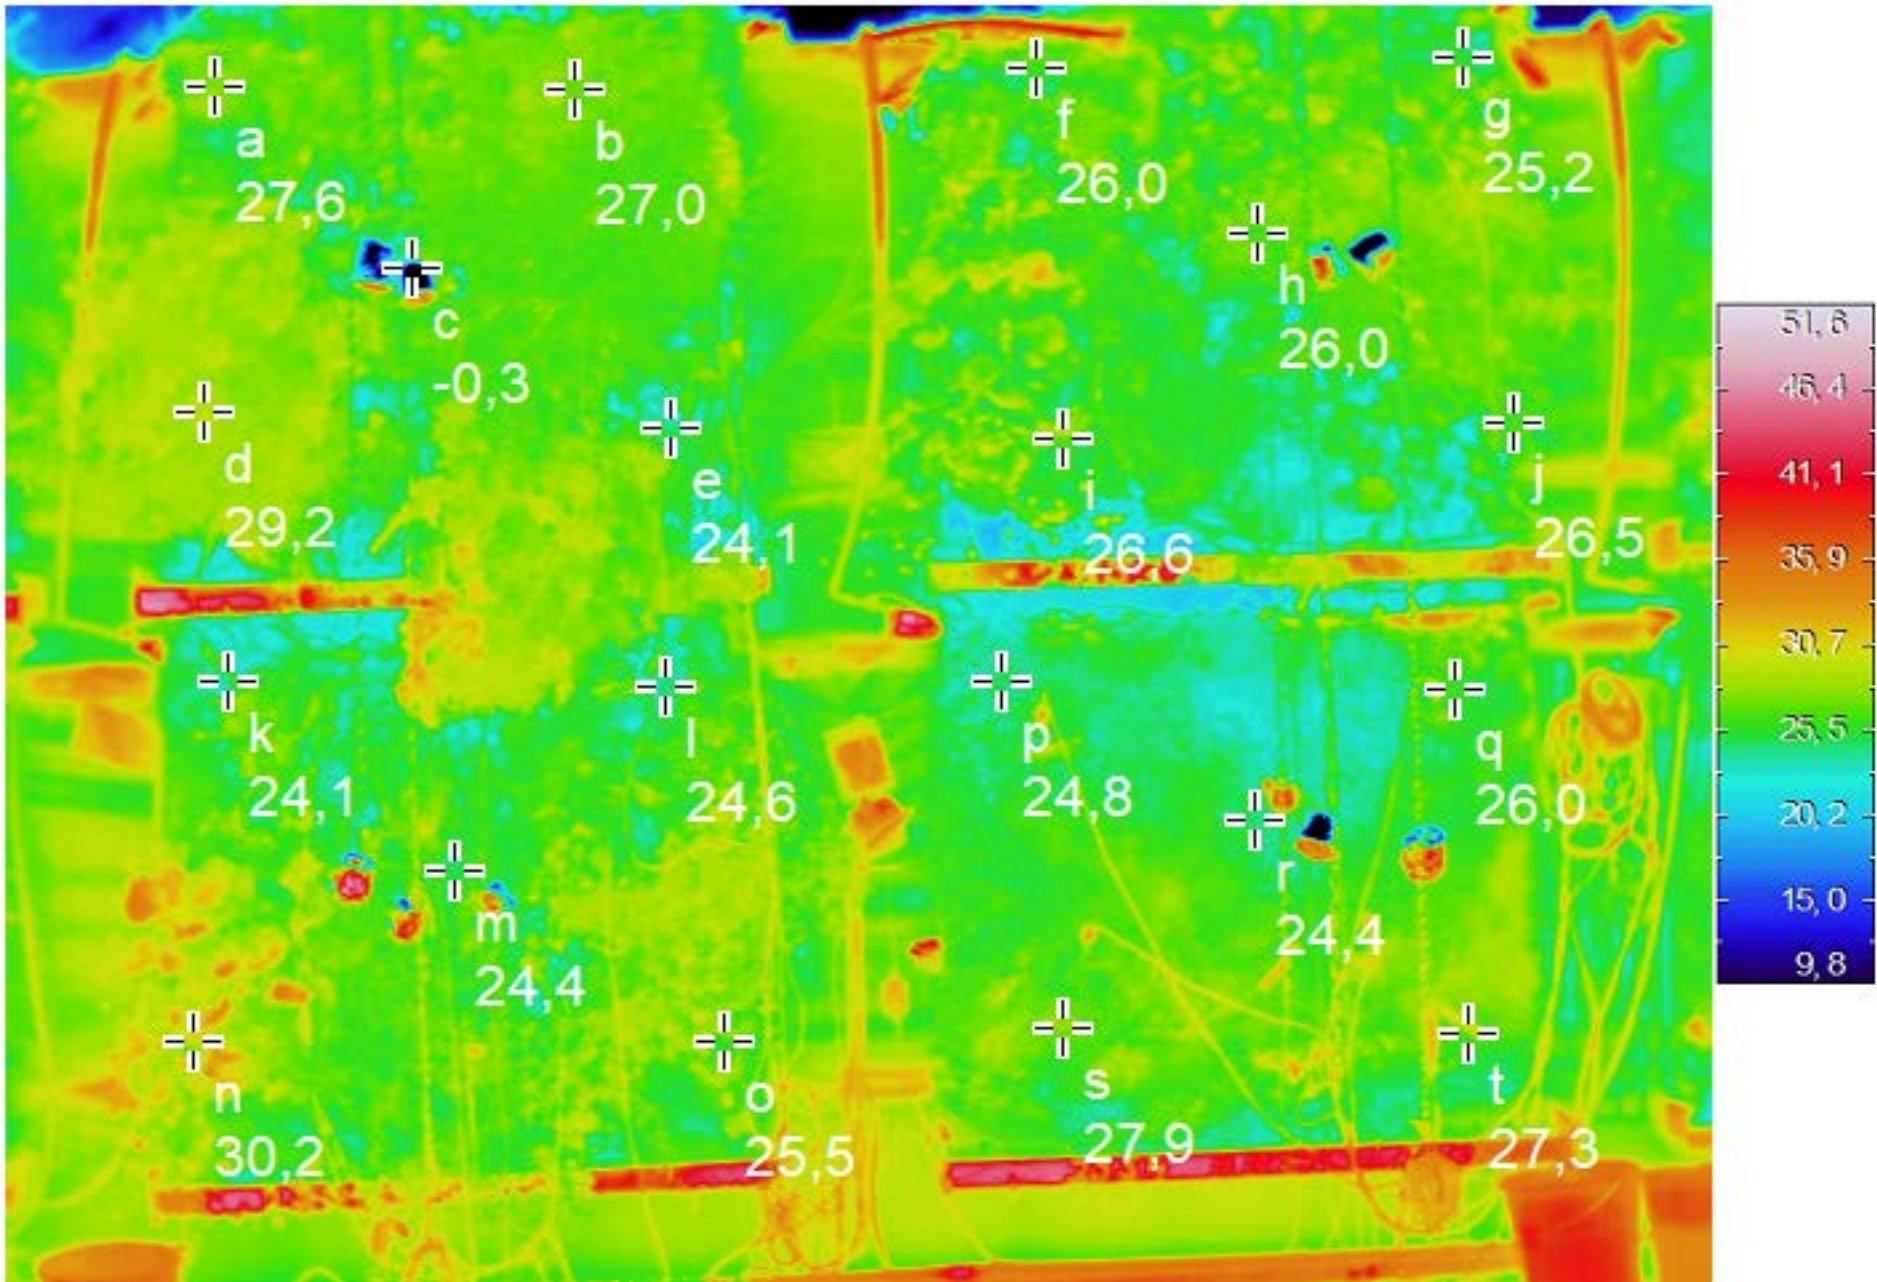

DateinameT02058IR.JPG  
Messtag:2019/06/18  
Messzeit:14:35:12  
Kommentar:  
Kameramodell:R500P  
Range:1[-20,0C-60,0C]  
BildmodusMEDx1,00  
Externes Objektiv:Standard  
Emissionsgrad:1.00  
Ambient Temp: 24,9IC  
IR Bildx1,00



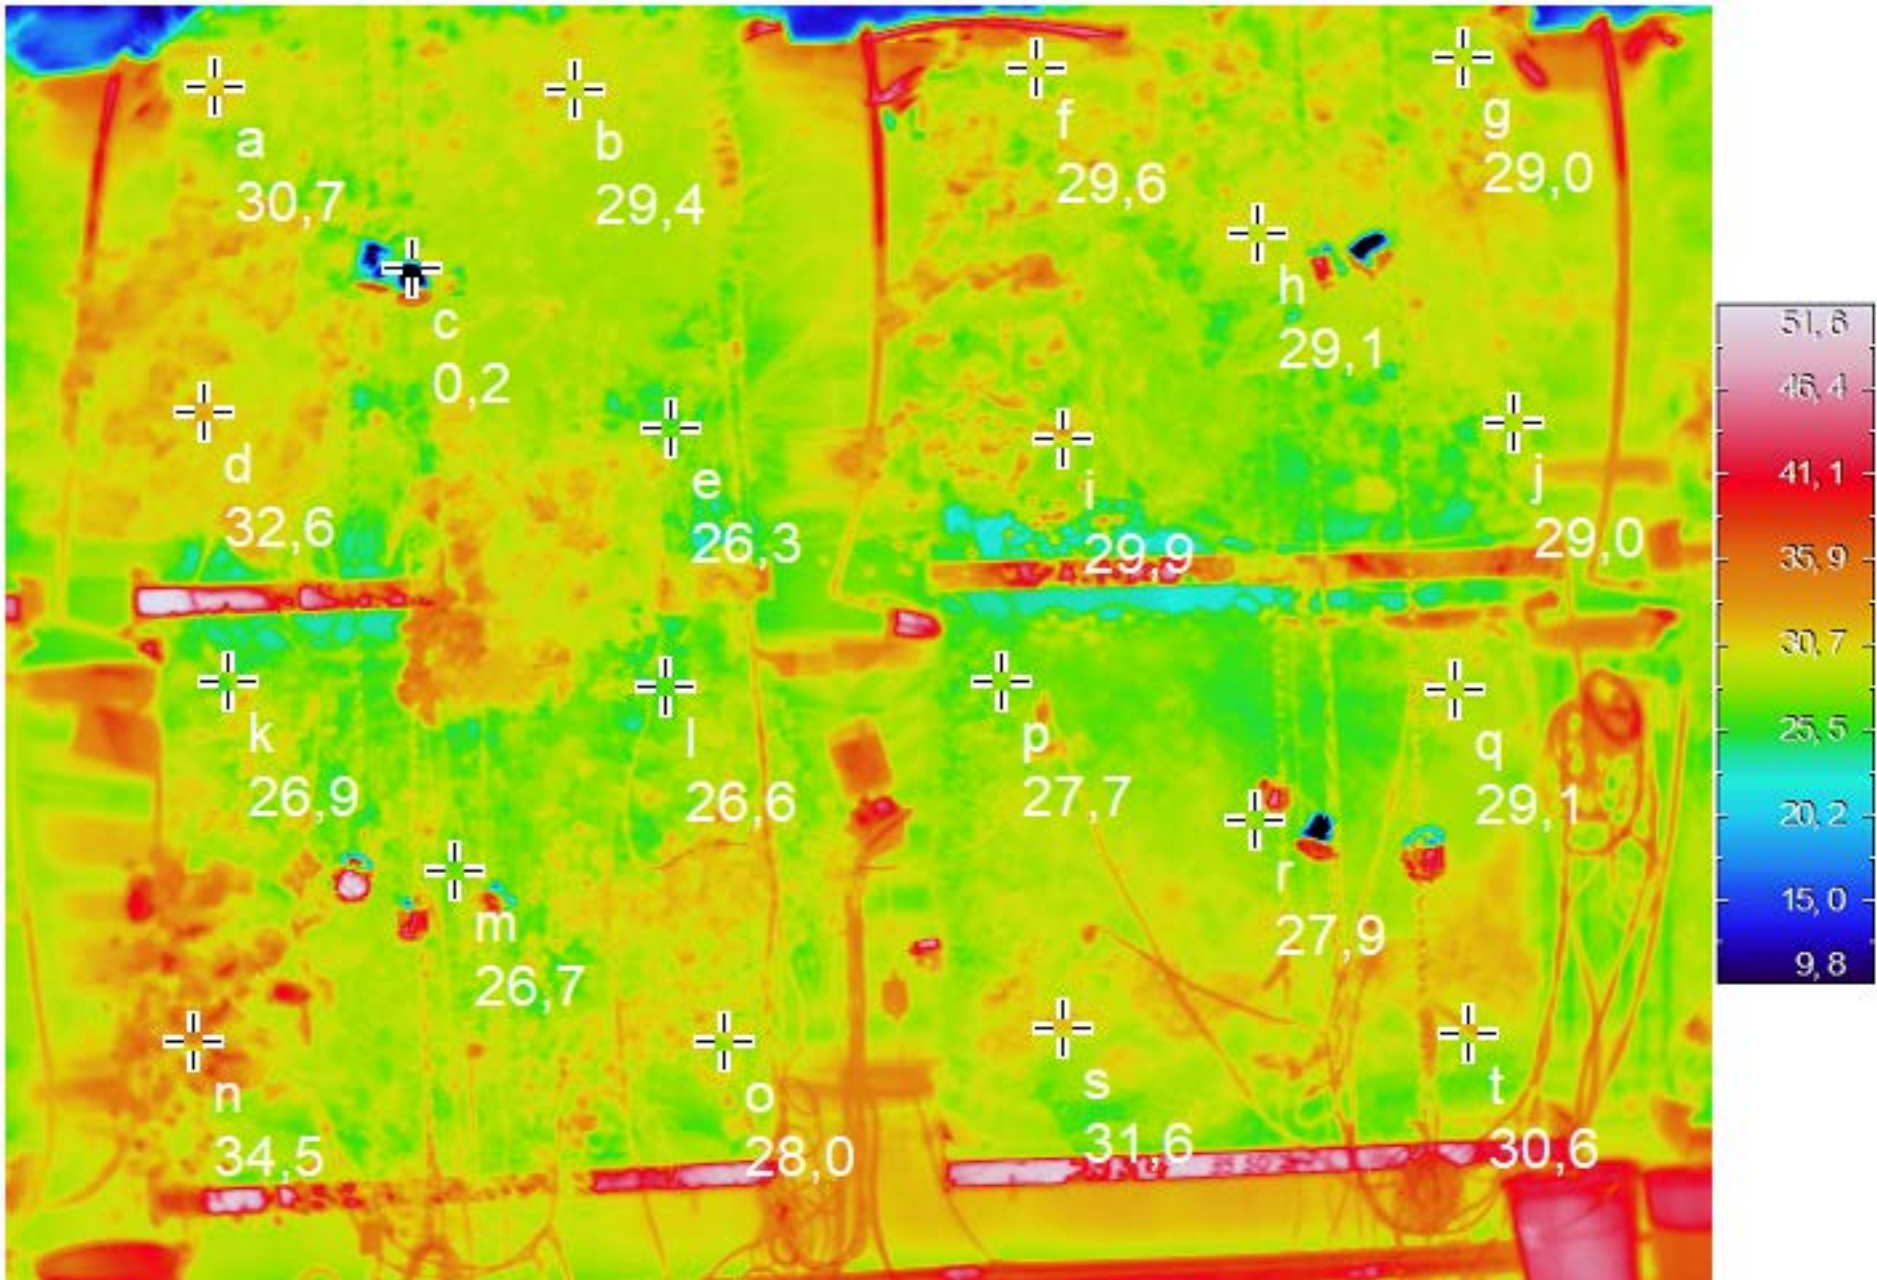

DateinameT02059IR.JPG  
Messtag:2019/06/18  
Messzeit:14:39:12  
Kommentar:  
Kameramodell:R500P  
Range:1[-20,0C-60,0C]  
BildmodusMEDx1,00  
Externes Objektiv:Standard  
Emissionsgrad:1.00  
Ambient Temp: 24,9IC  
IR Bildx1,00



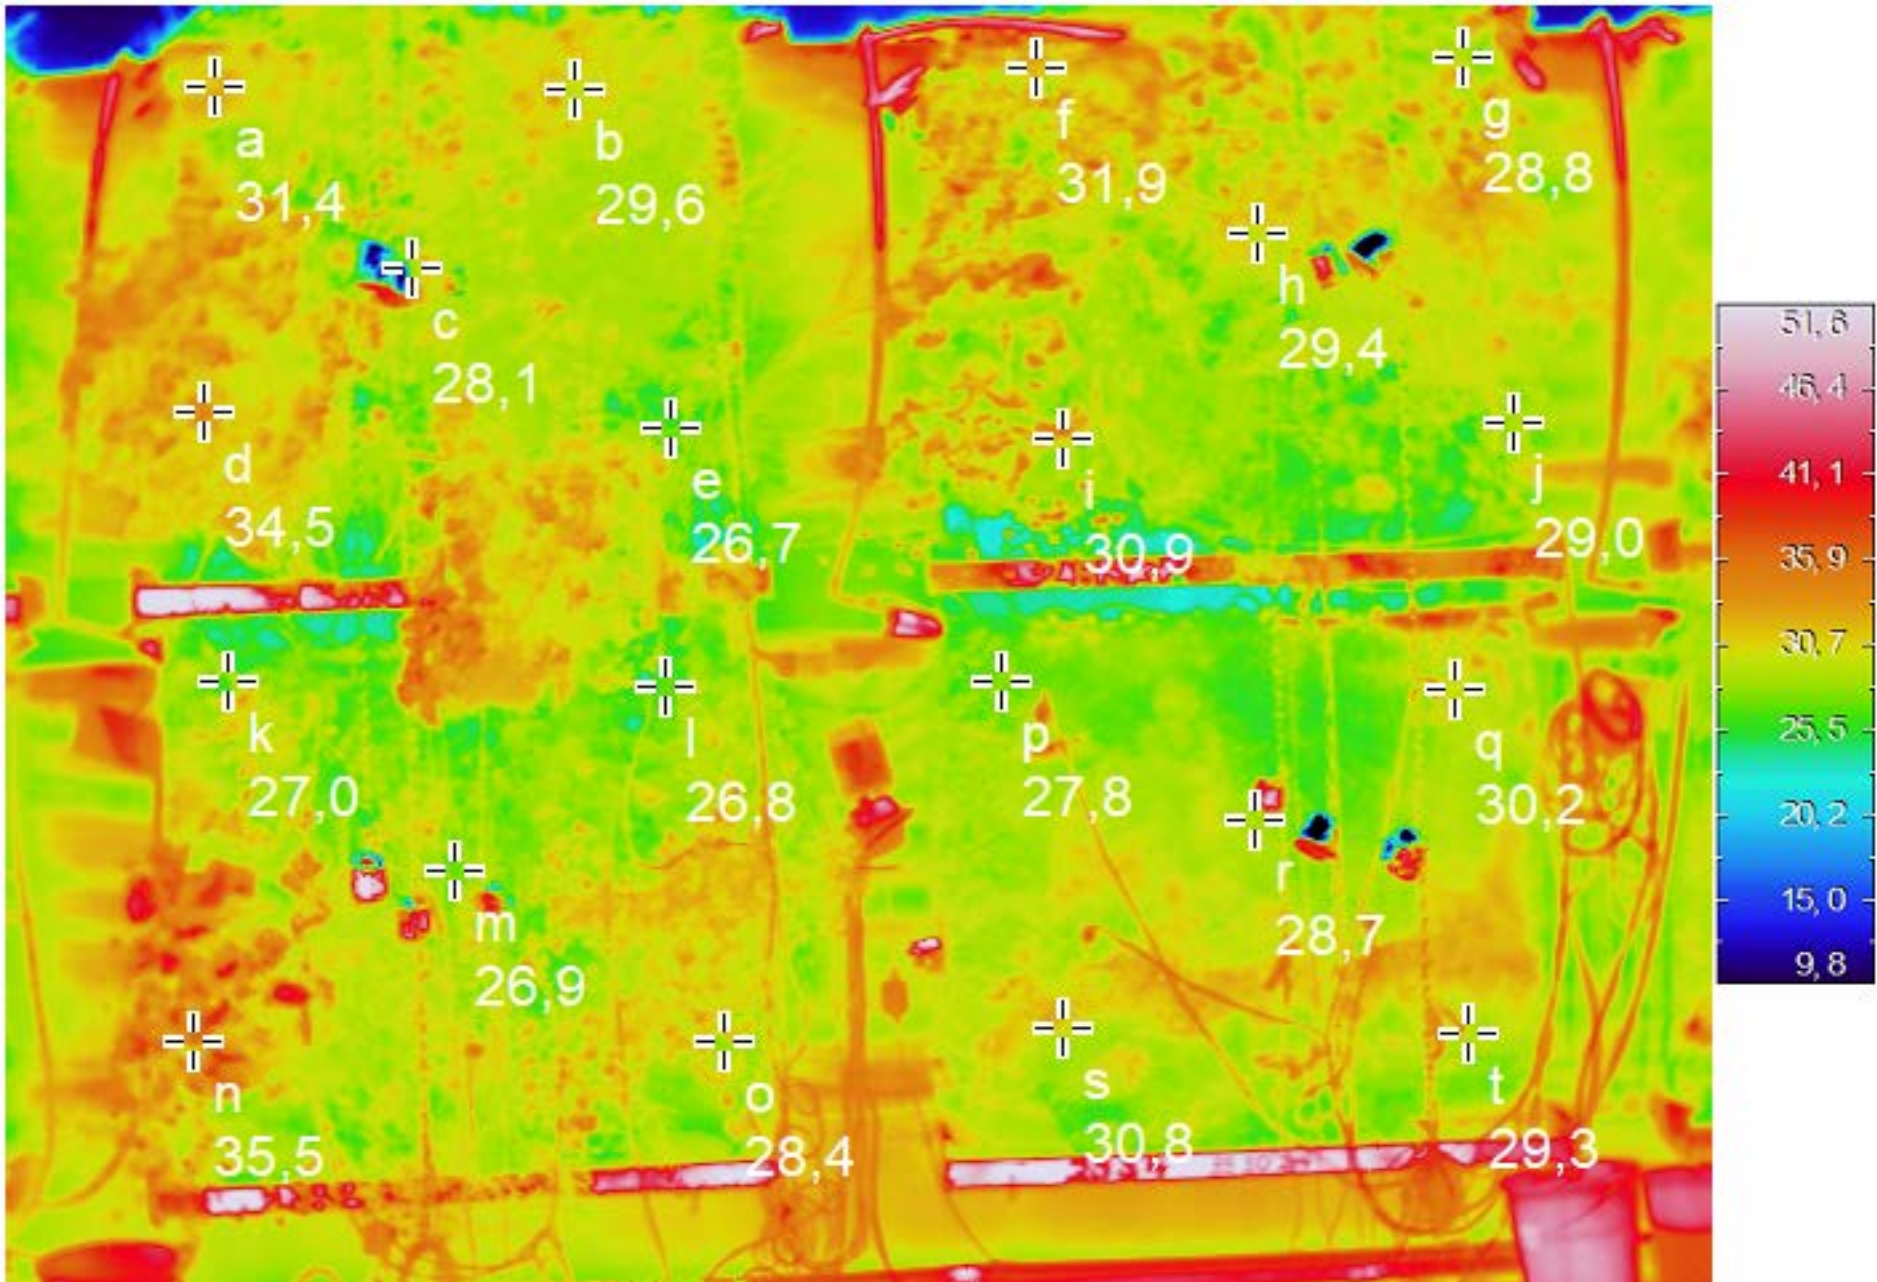

DateinameT02060IR.JPG  
Messtag:2019/06/18  
Messzeit:14:43:12  
Kommentar:  
Kameramodell:R500P  
Range:1[-20,0C-60,0C]  
BildmodusMEDx1,00  
Externes Objektiv:Standard  
Emissionsgrad:1.00  
Ambient Temp: 24,9IC  
IR Bildx1,00



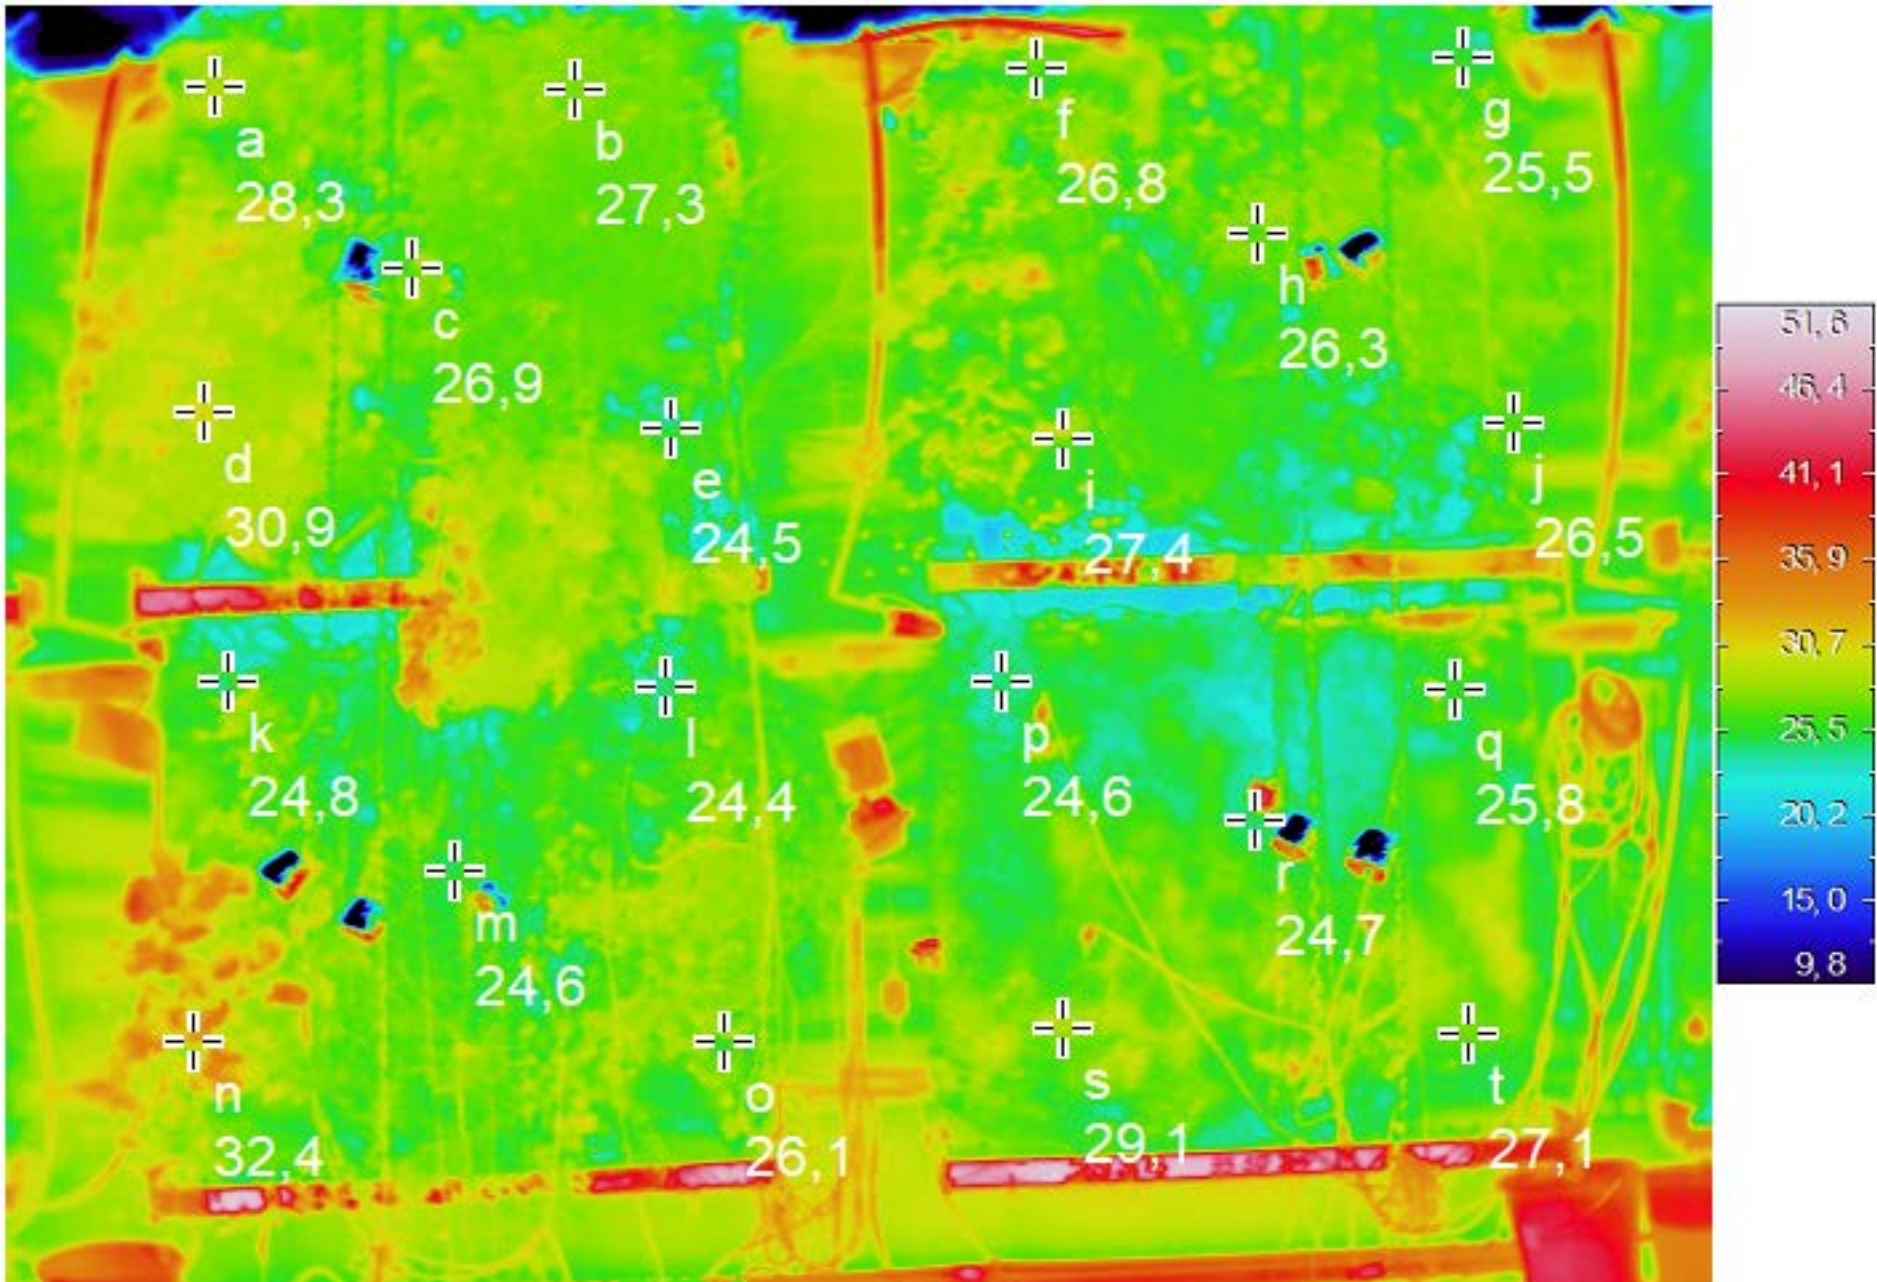

DateinameT02061IR.JPG  
Messtag:2019/06/18  
Messzeit:14:47:12  
Kommentar:  
Kameramodell:R500P  
Range:1[-20,0C-60,0C]  
BildmodusMEDx1,00  
Externes Objektiv:Standard  
Emissionsgrad:1.00  
Ambient Temp: 24,9IC  
IR Bildx1,00



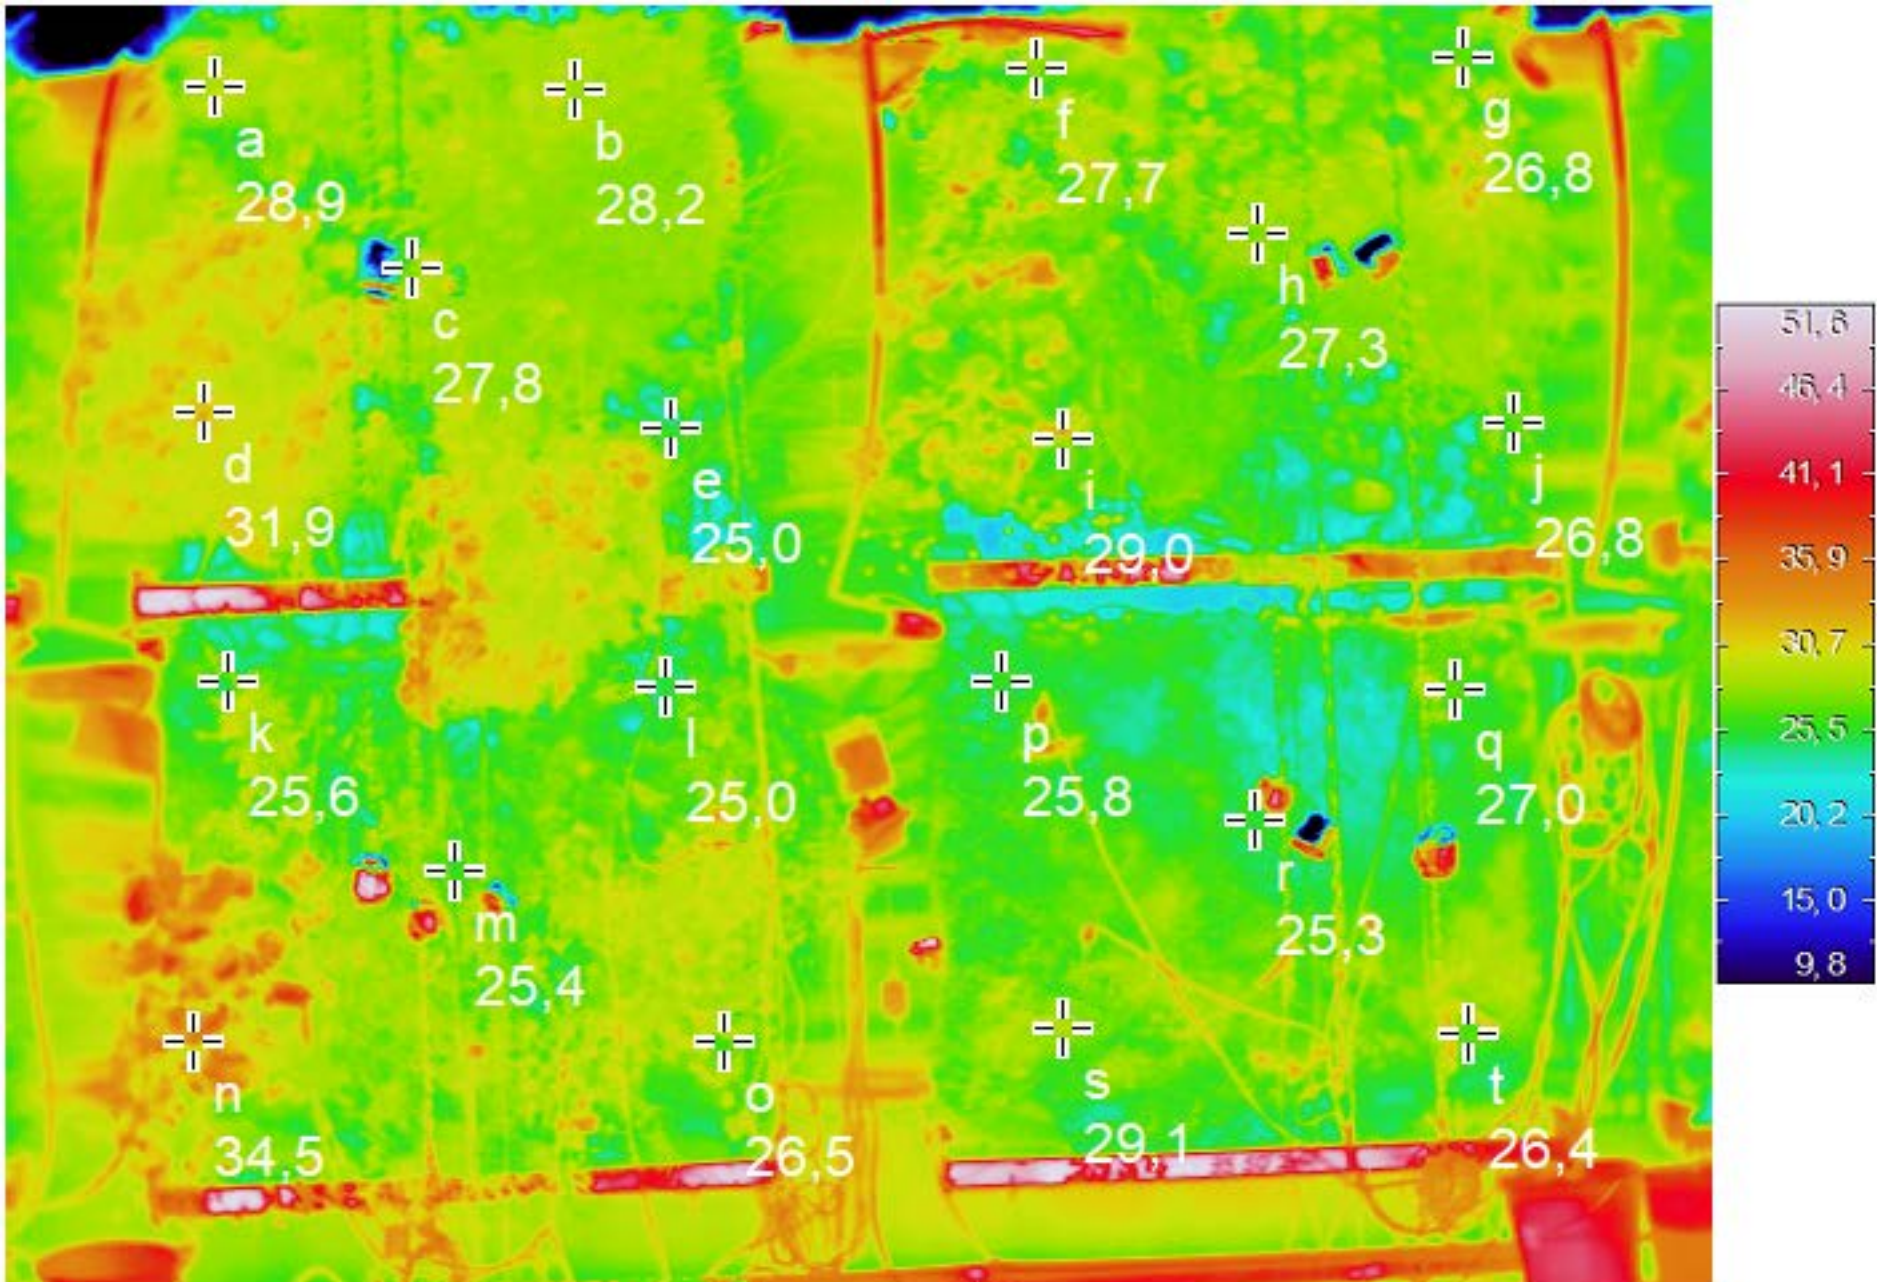

DateinameT02062IR.JPG  
Messtag:2019/06/18  
Messzeit:14:51:12  
Kommentar:  
Kameramodell:R500P  
Range:1[-20,0C-60,0C]  
BildmodusMEDx1,00  
Externes Objektiv:Standard  
Emissionsgrad:1.00  
Ambient Temp: 24,9IC  
IR Bildx1,00



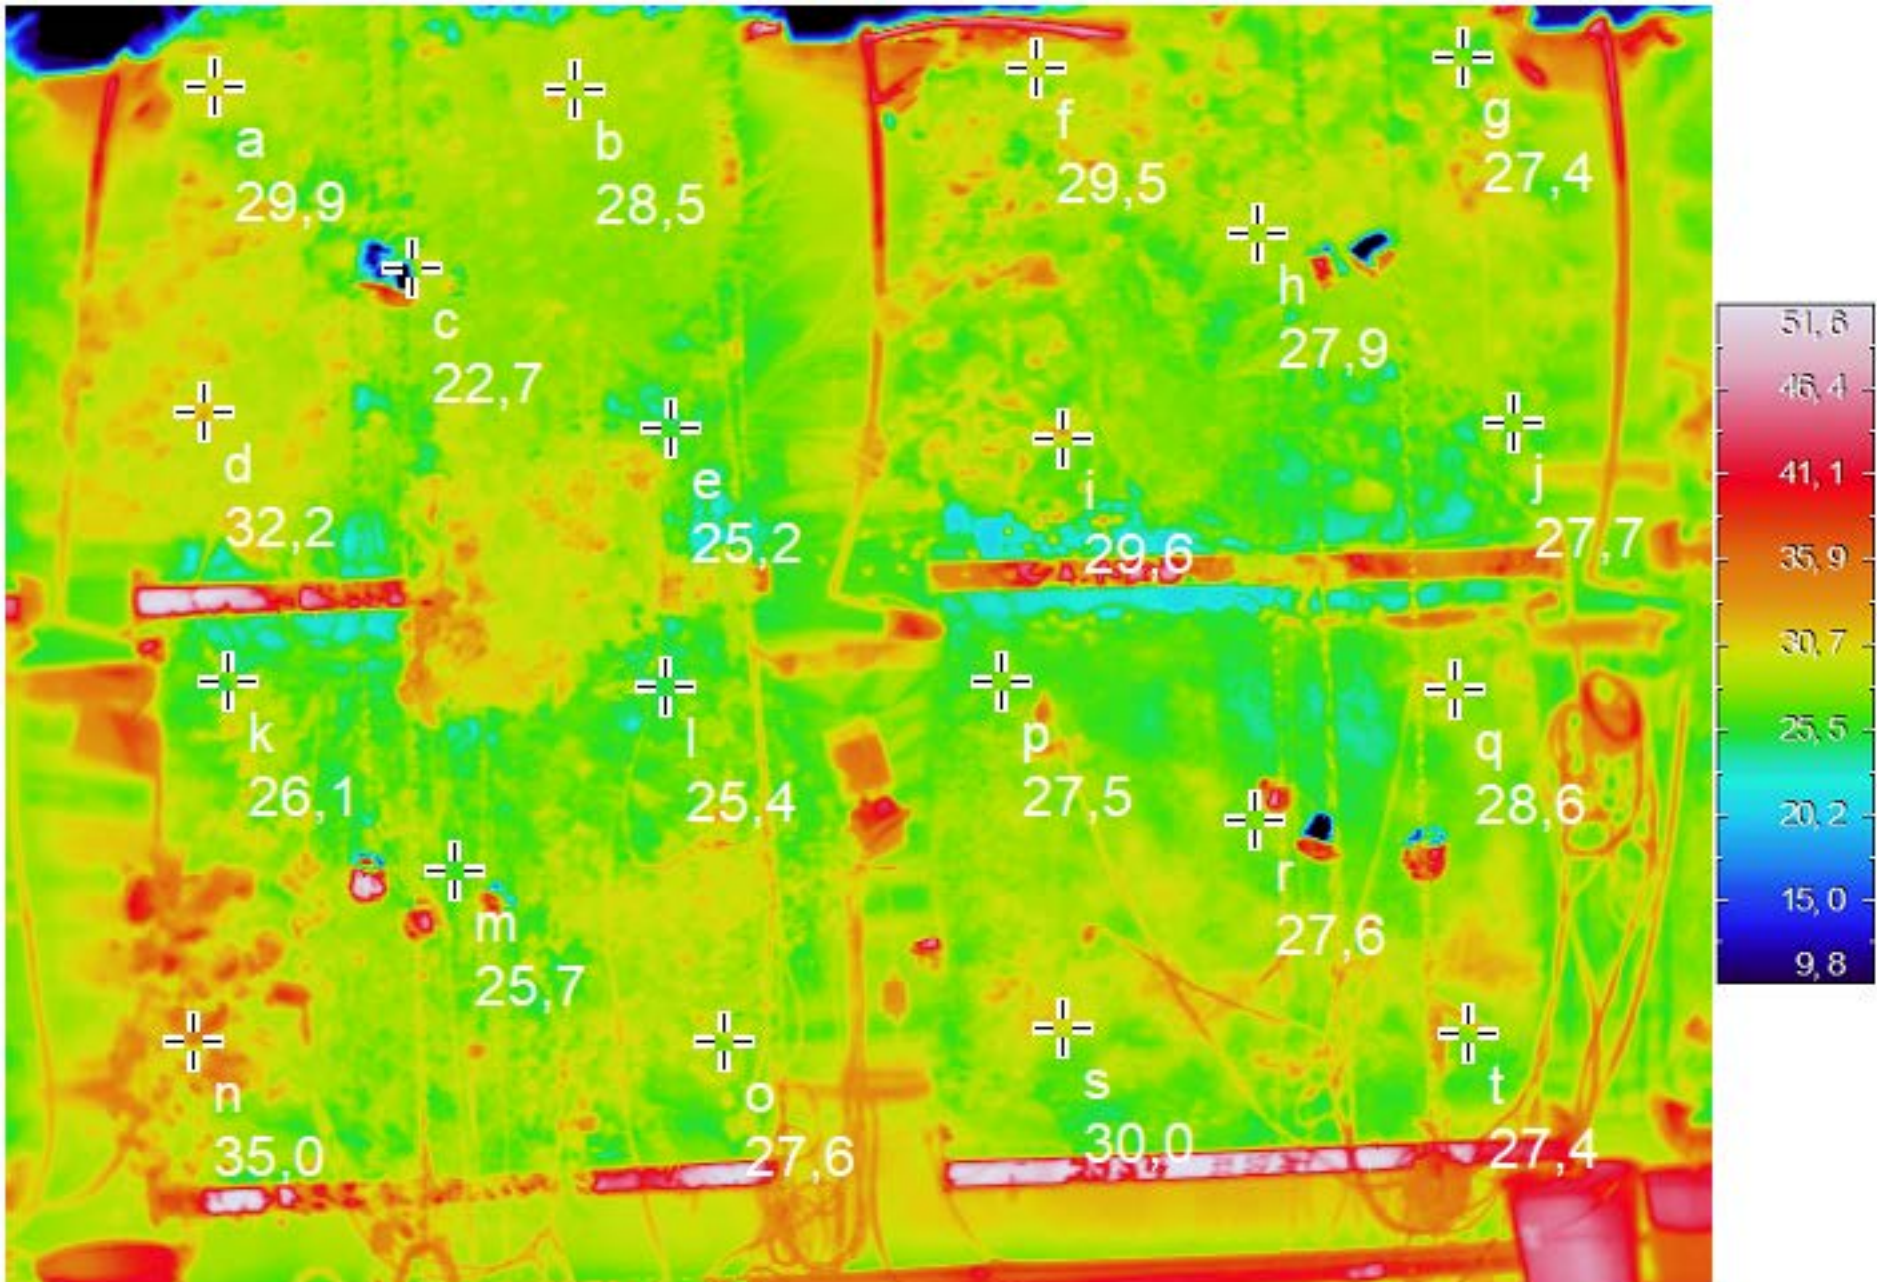

DateinameT02063IR.JPG  
Messtag:2019/06/18  
Messzeit:14:55:12  
Kommentar:  
Kameramodell:R500P  
Range:1[-20,0C-60,0C]  
BildmodusMEDx1,00  
Externes Objektiv:Standard  
Emissionsgrad:1.00  
Ambient Temp: 24,9IC  
IR Bildx1,00



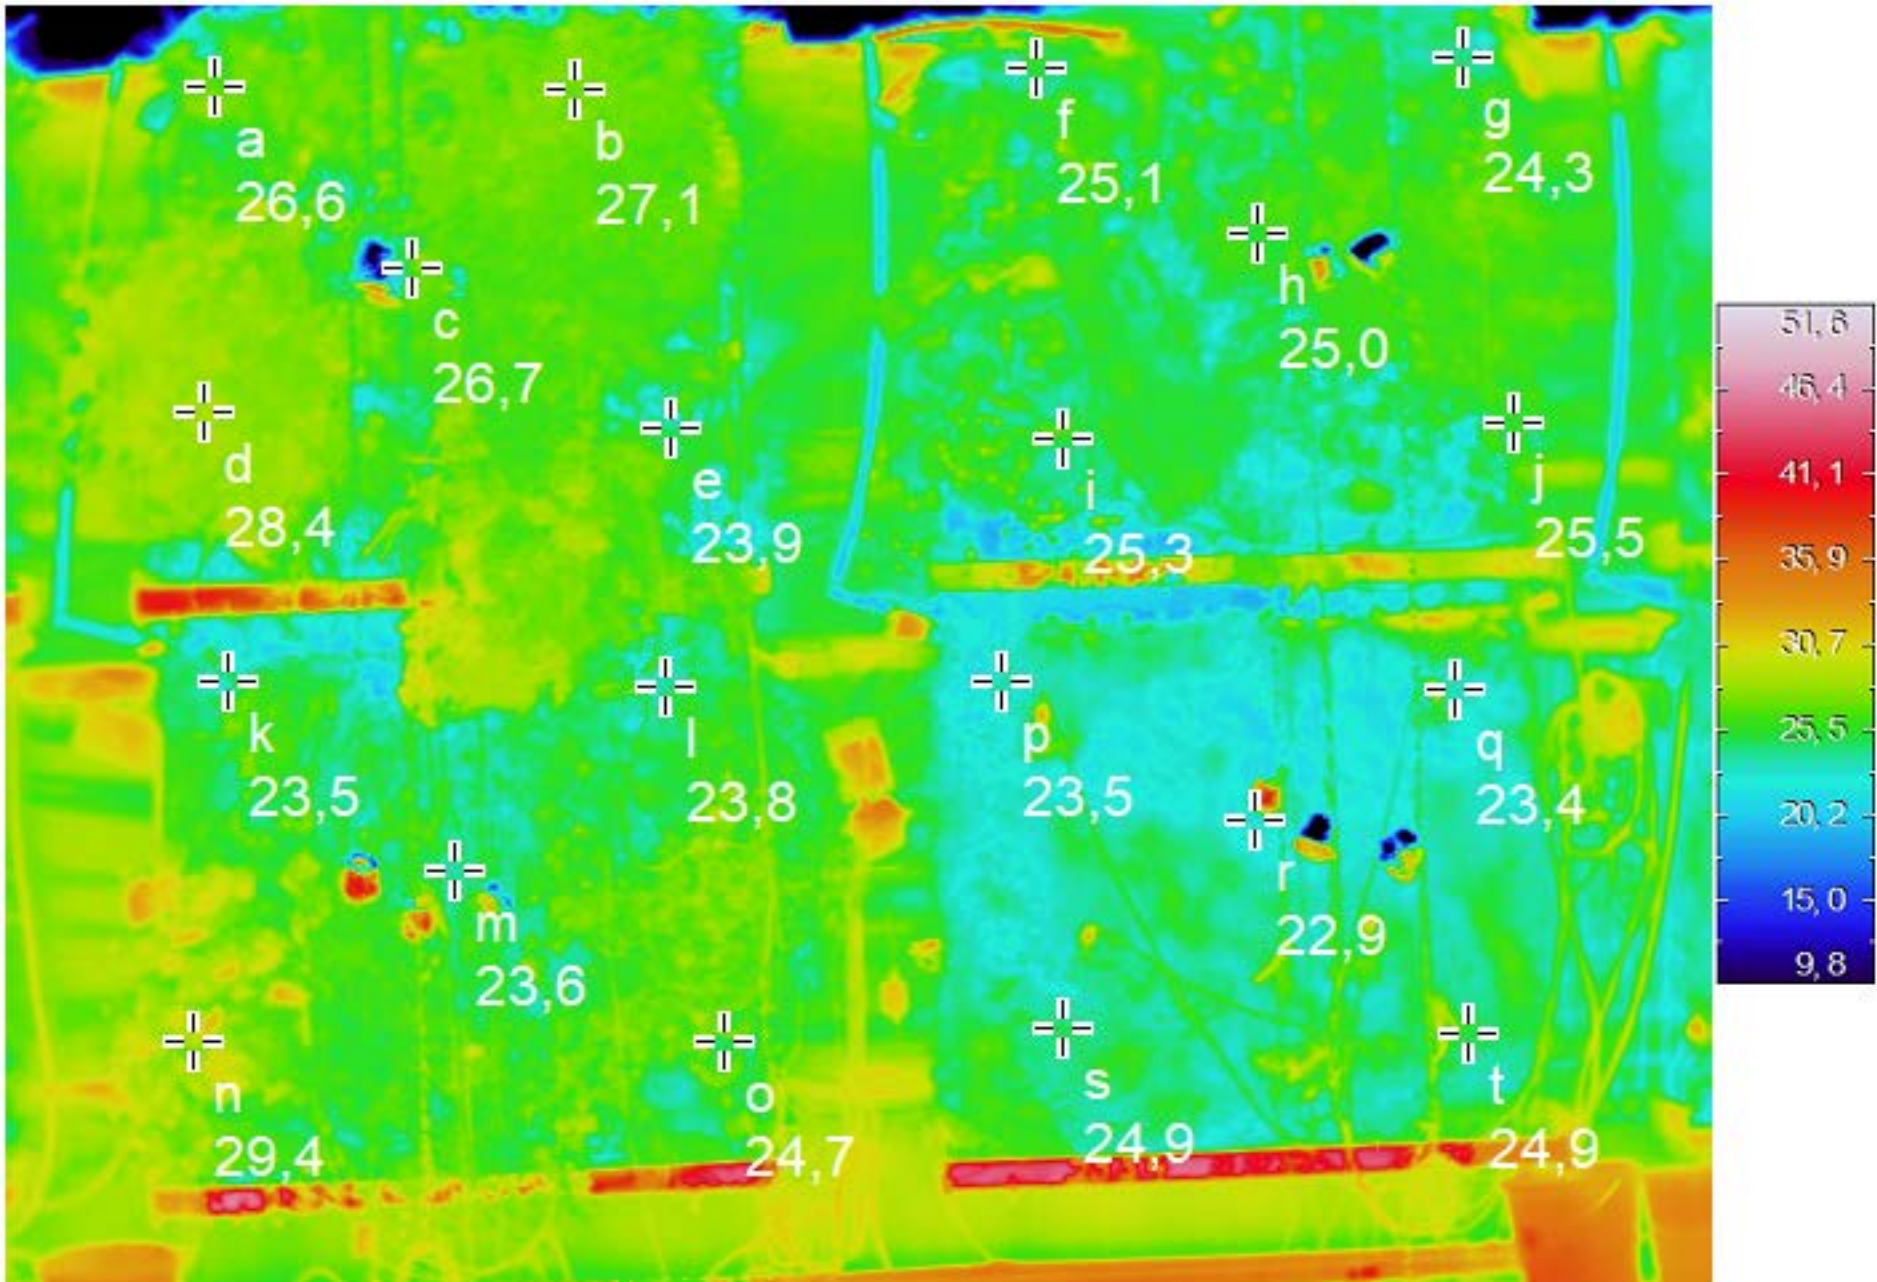

DateinameT02064IR.JPG  
Messtag:2019/06/18  
Messzeit:14:59:12  
Kommentar:  
Kameramodell:R500P  
Range:1[-20,0C-60,0C]  
BildmodusMEDx1,00  
Externes Objektiv:Standard  
Emissionsgrad:1.00  
Ambient Temp: 24,9IC  
IR Bildx1,00



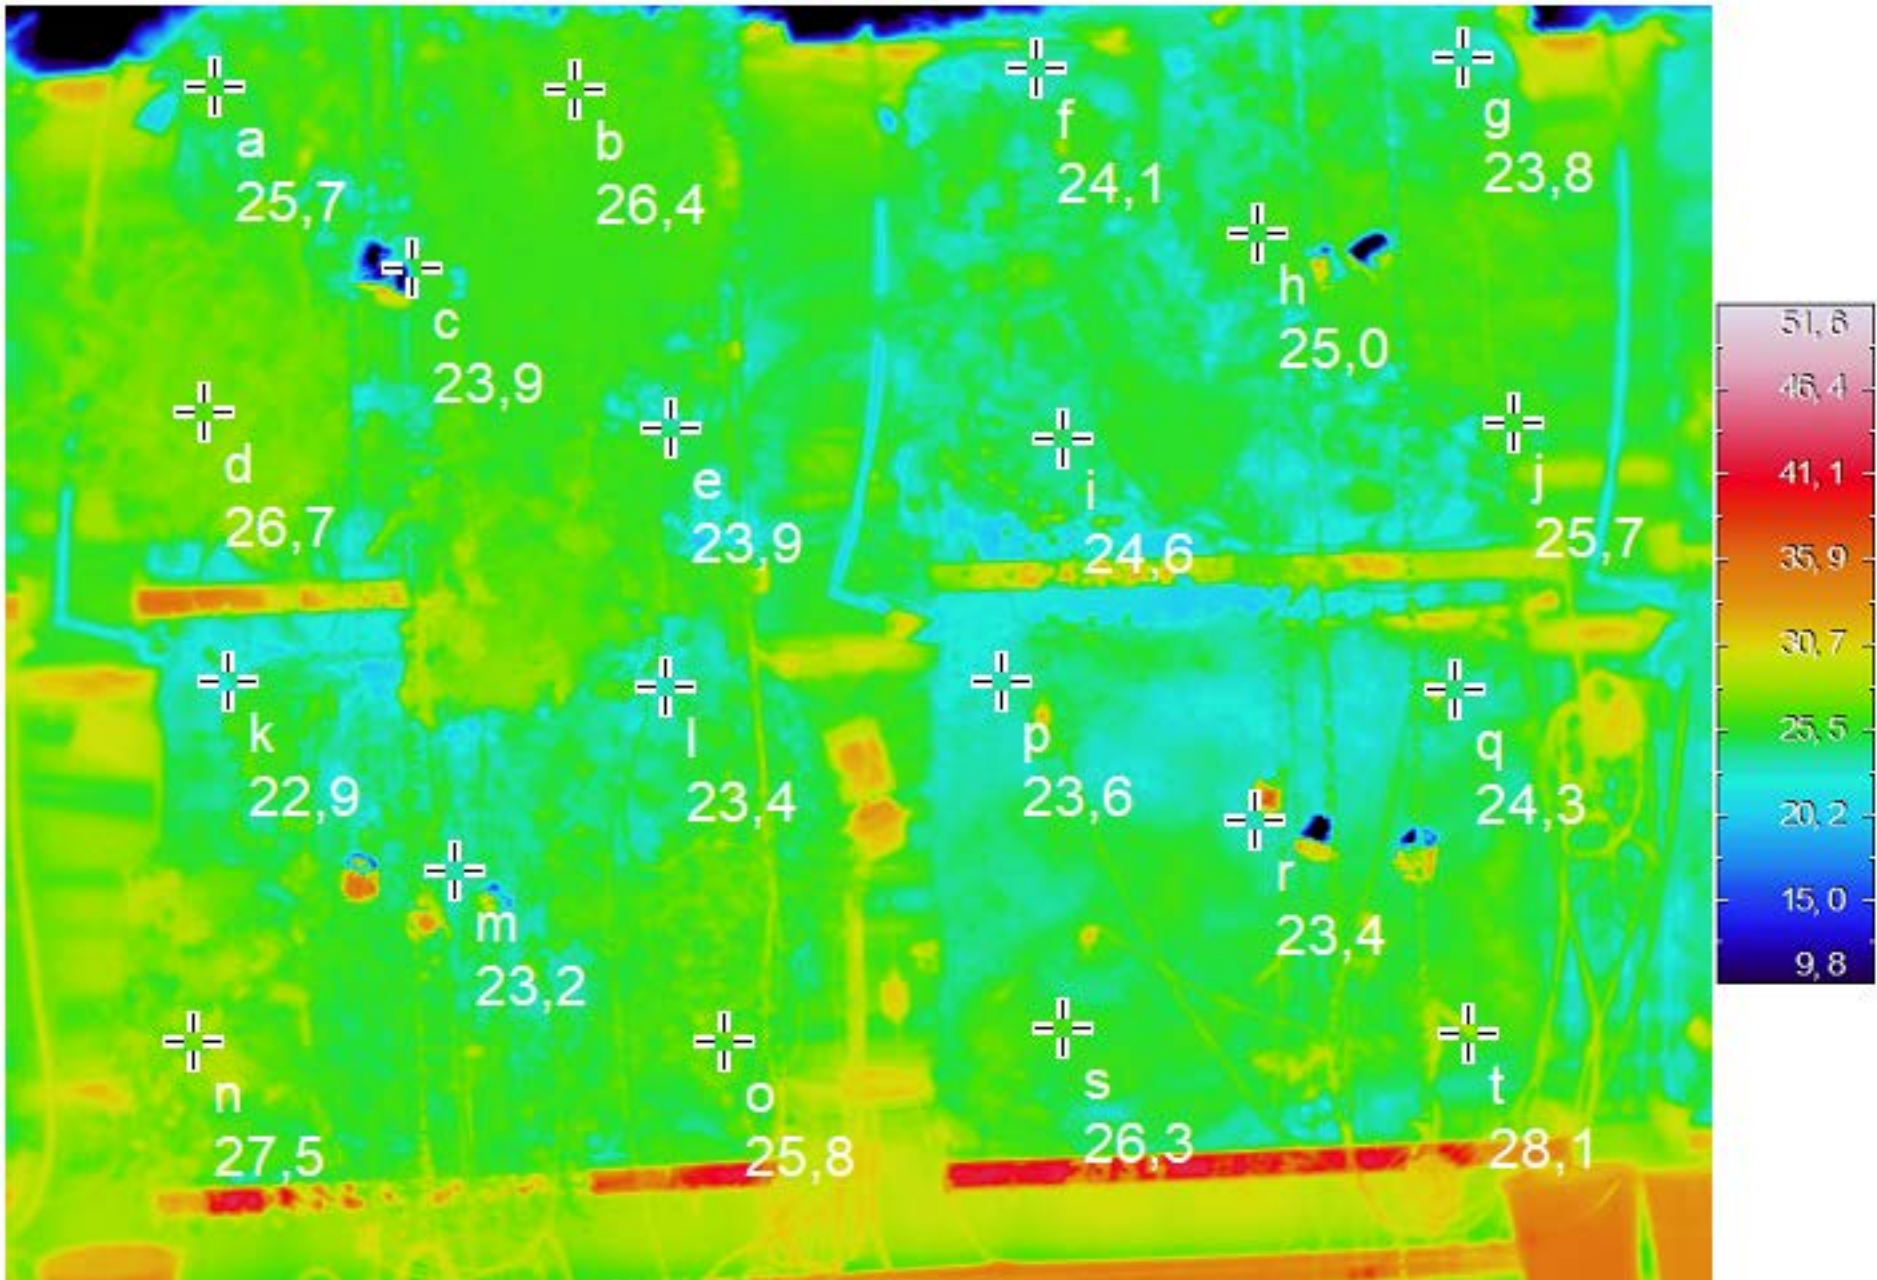

DateinameT02065IR.JPG  
Messtag:2019/06/18  
Messzeit:15:03:12  
Kommentar:  
Kameramodell:R500P  
Range:1[-20,0C-60,0C]  
BildmodusMEDx1,00  
Externes Objektiv:Standard  
Emissionsgrad:1.00  
Ambient Temp: 24,9IC  
IR Bildx1,00



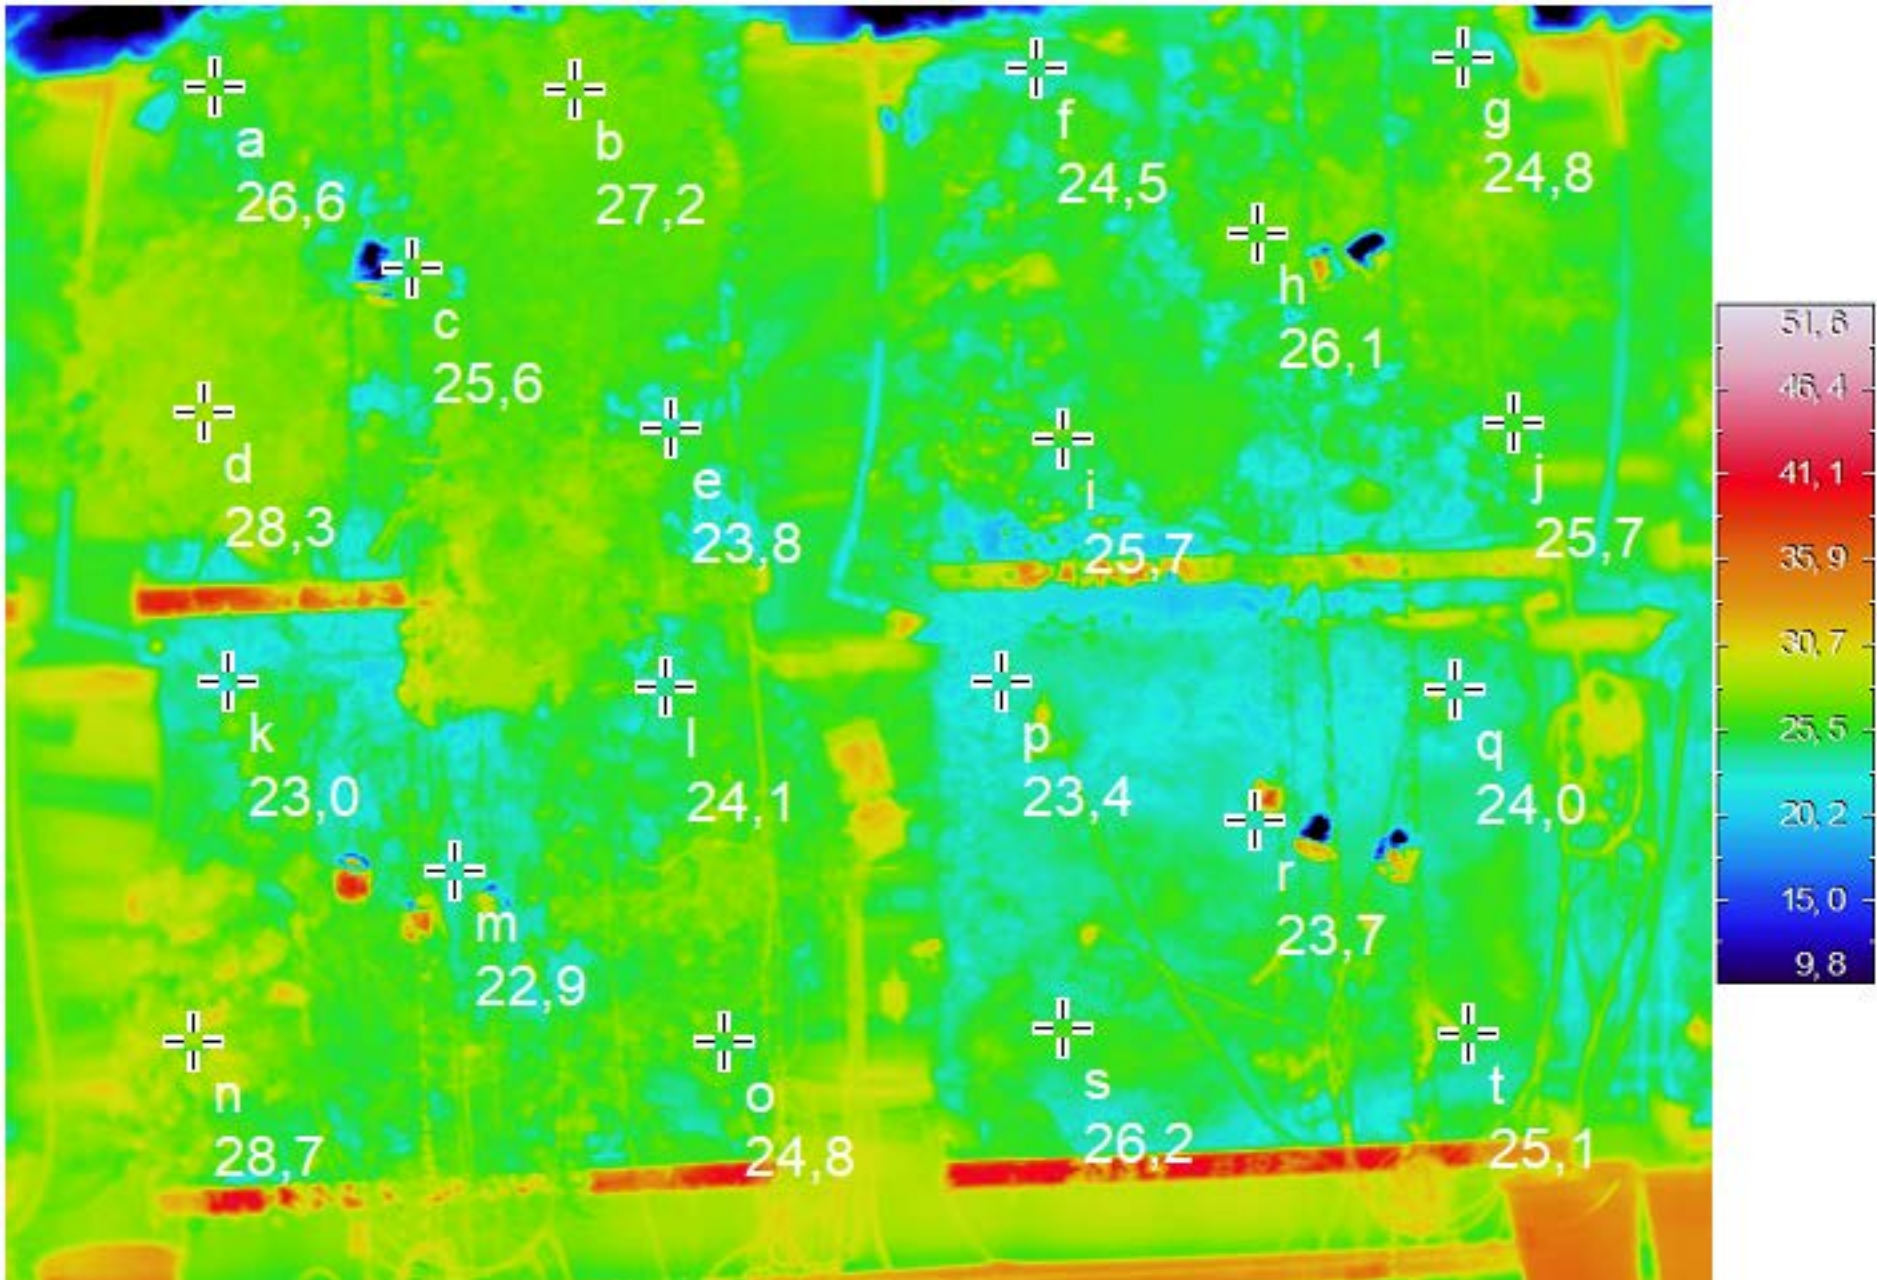

DateinameT02066IR.JPG  
Messtag:2019/06/18  
Messzeit:15:07:12  
Kommentar:  
Kameramodell:R500P  
Range:1[-20,0C-60,0C]  
BildmodusMEDx1,00  
Externes Objektiv:Standard  
Emissionsgrad:1.00  
Ambient Temp: 24,9IC  
IR Bildx1,00



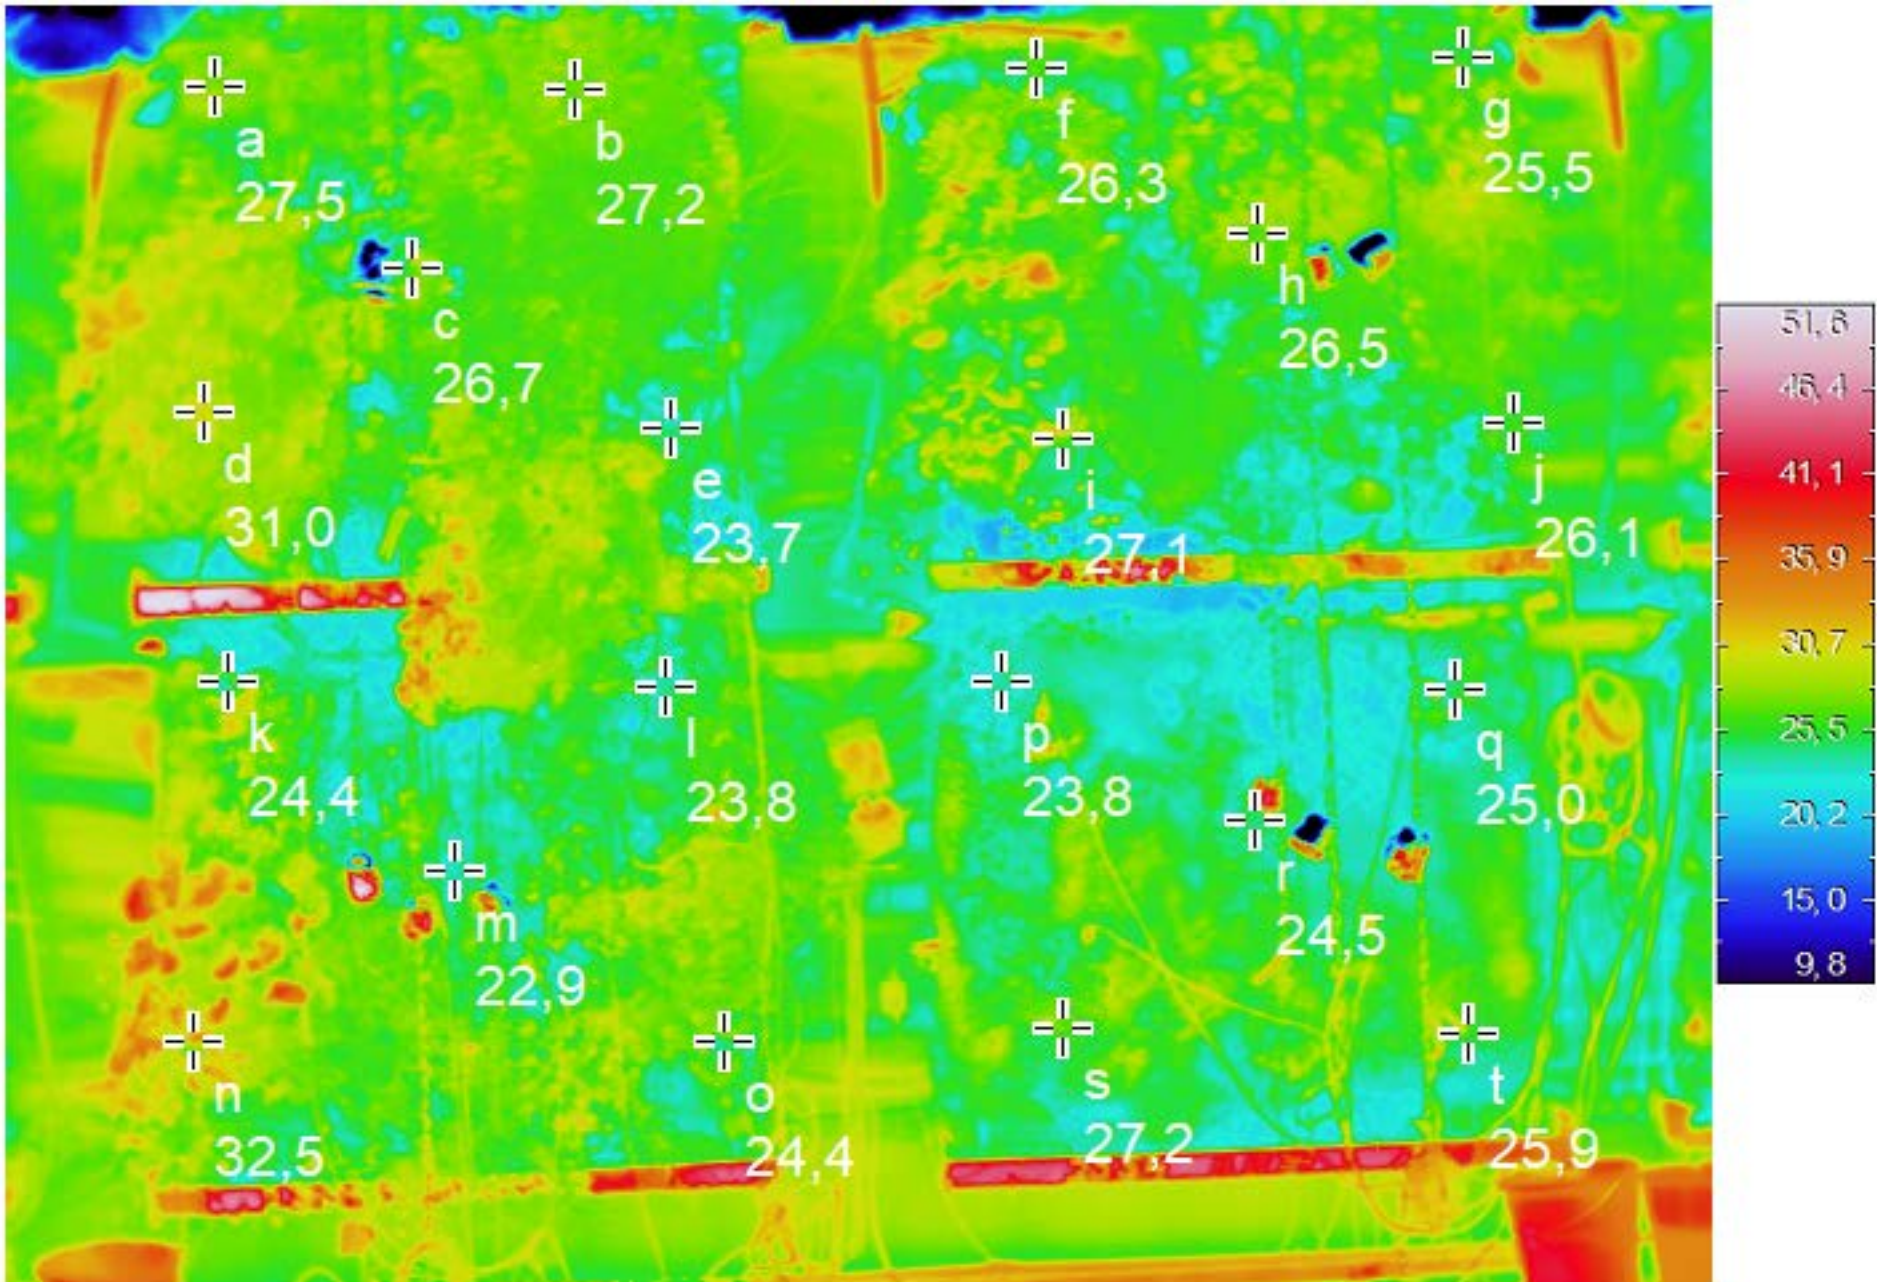

DateinameT02067IR.JPG  
Messtag:2019/06/18  
Messzeit:15:11:12  
Kommentar:  
Kameramodell:R500P  
Range:1[-20,0C-60,0C]  
BildmodusMEDx1,00  
Externes Objektiv:Standard  
Emissionsgrad:1.00  
Ambient Temp: 24,9IC  
IR Bildx1,00



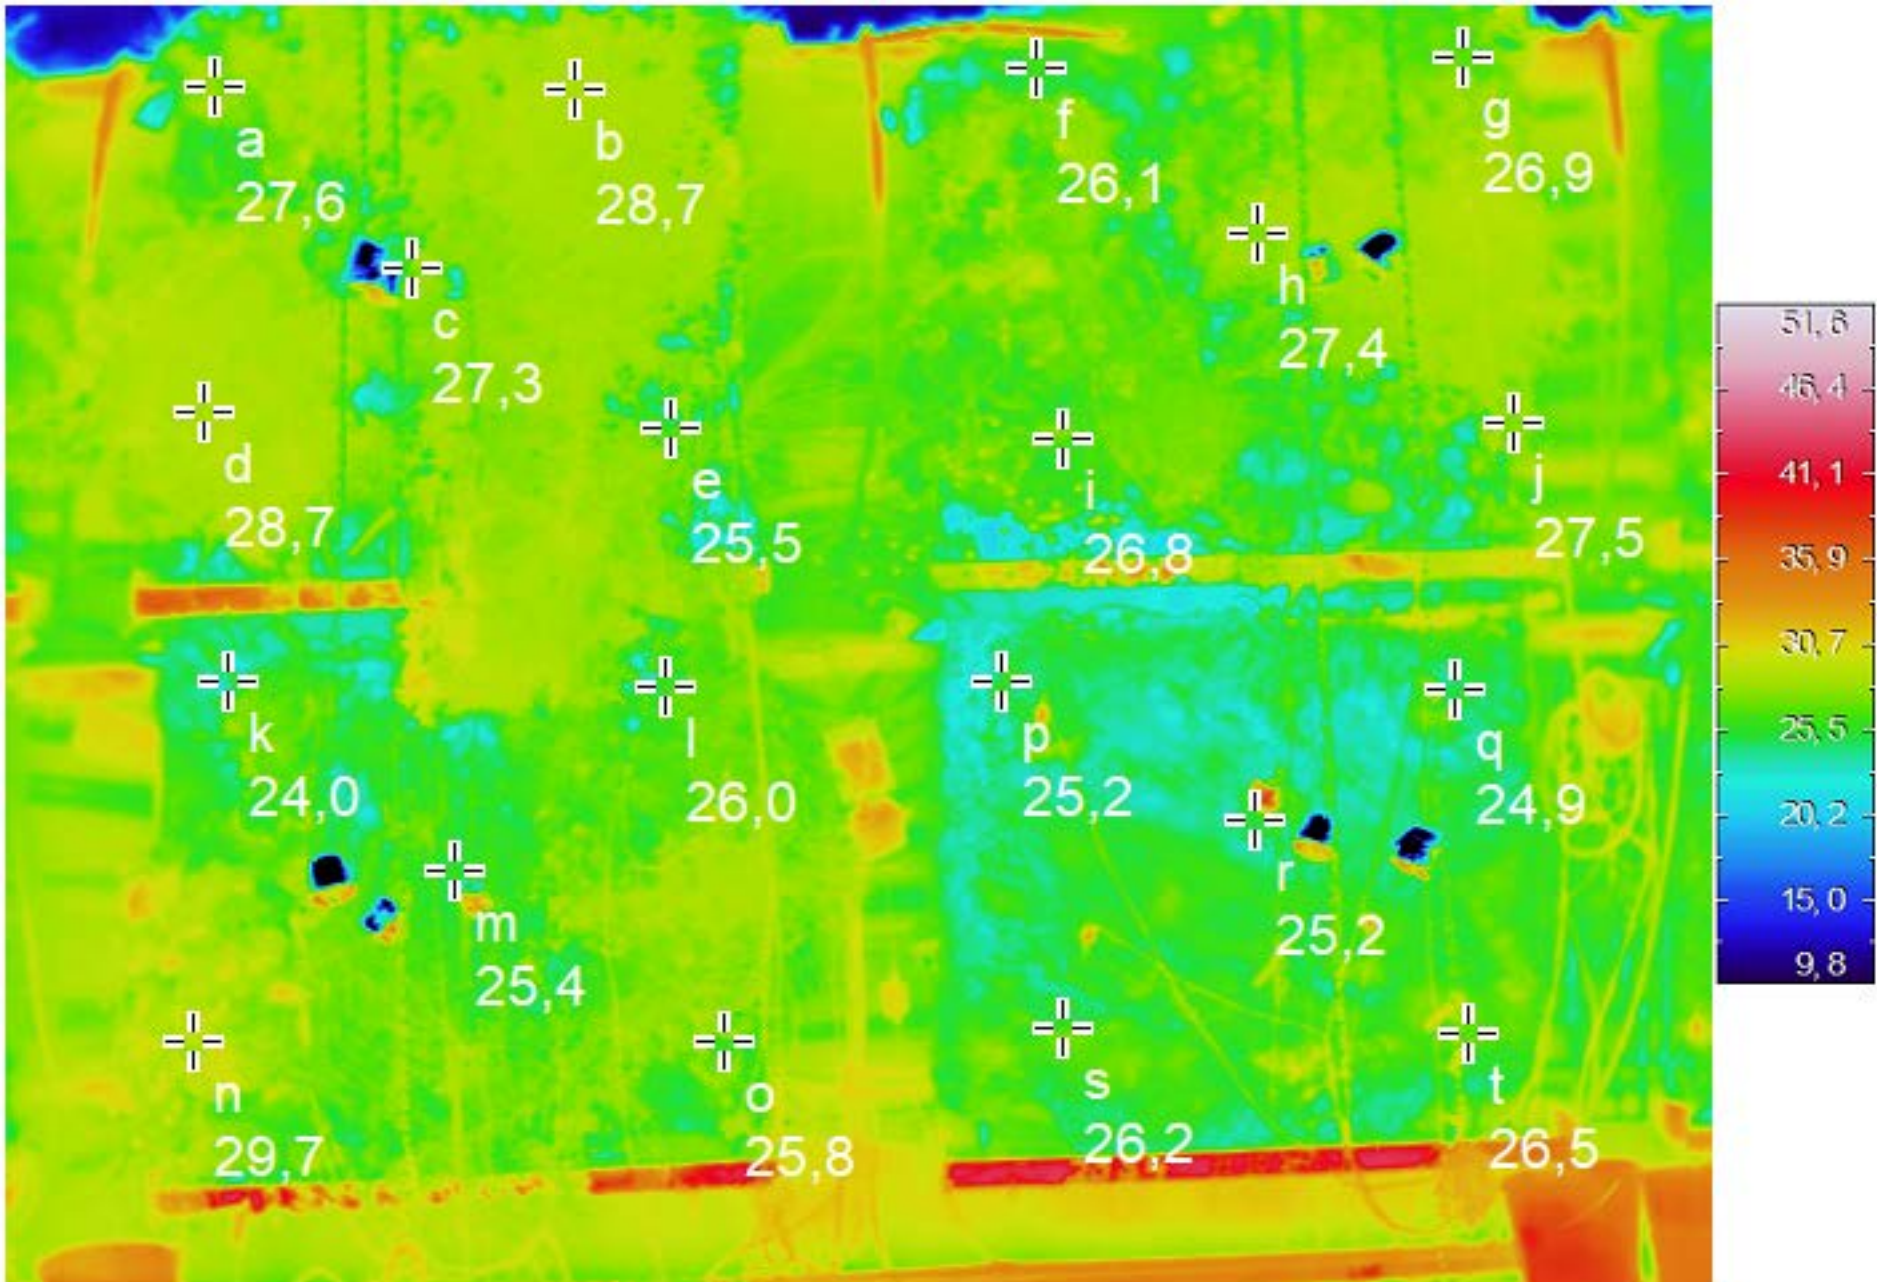

DateinameT02068IR.JPG  
Messtag:2019/06/18  
Messzeit:15:15:13  
Kommentar:  
Kameramodell:R500P  
Range:1[-20,0C-60,0C]  
BildmodusMEDx1,00  
Externes Objektiv:Standard  
Emissionsgrad:1.00  
Ambient Temp: 24,9IC  
IR Bildx1,00



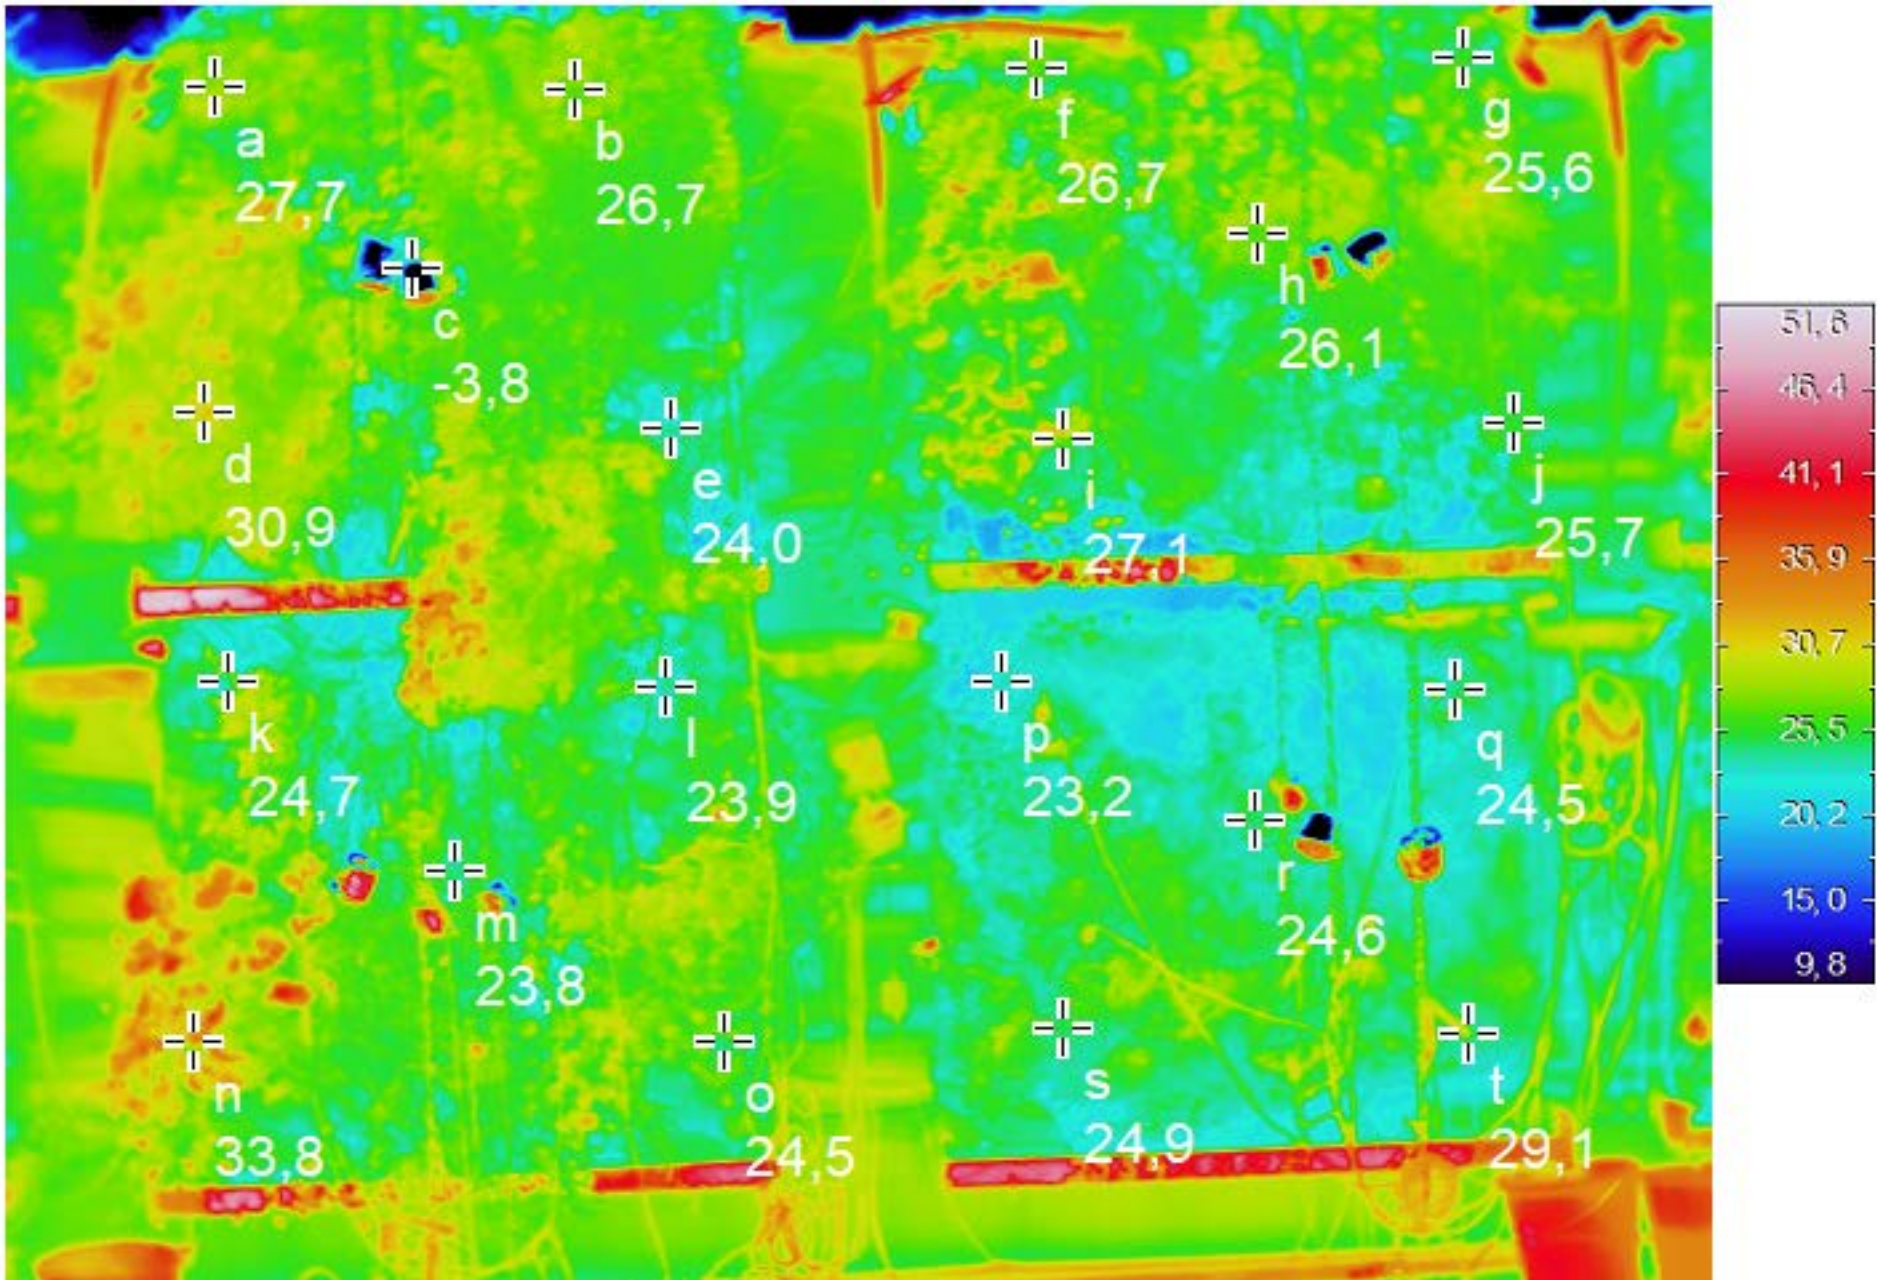

DateinameT02069IR.JPG  
Messtag:2019/06/18  
Messzeit:15:19:12  
Kommentar:  
Kameramodell:R500P  
Range:1[-20,0C-60,0C]  
BildmodusMEDx1,00  
Externes Objektiv:Standard  
Emissionsgrad:1.00  
Ambient Temp: 24,9IC  
IR Bildx1,00



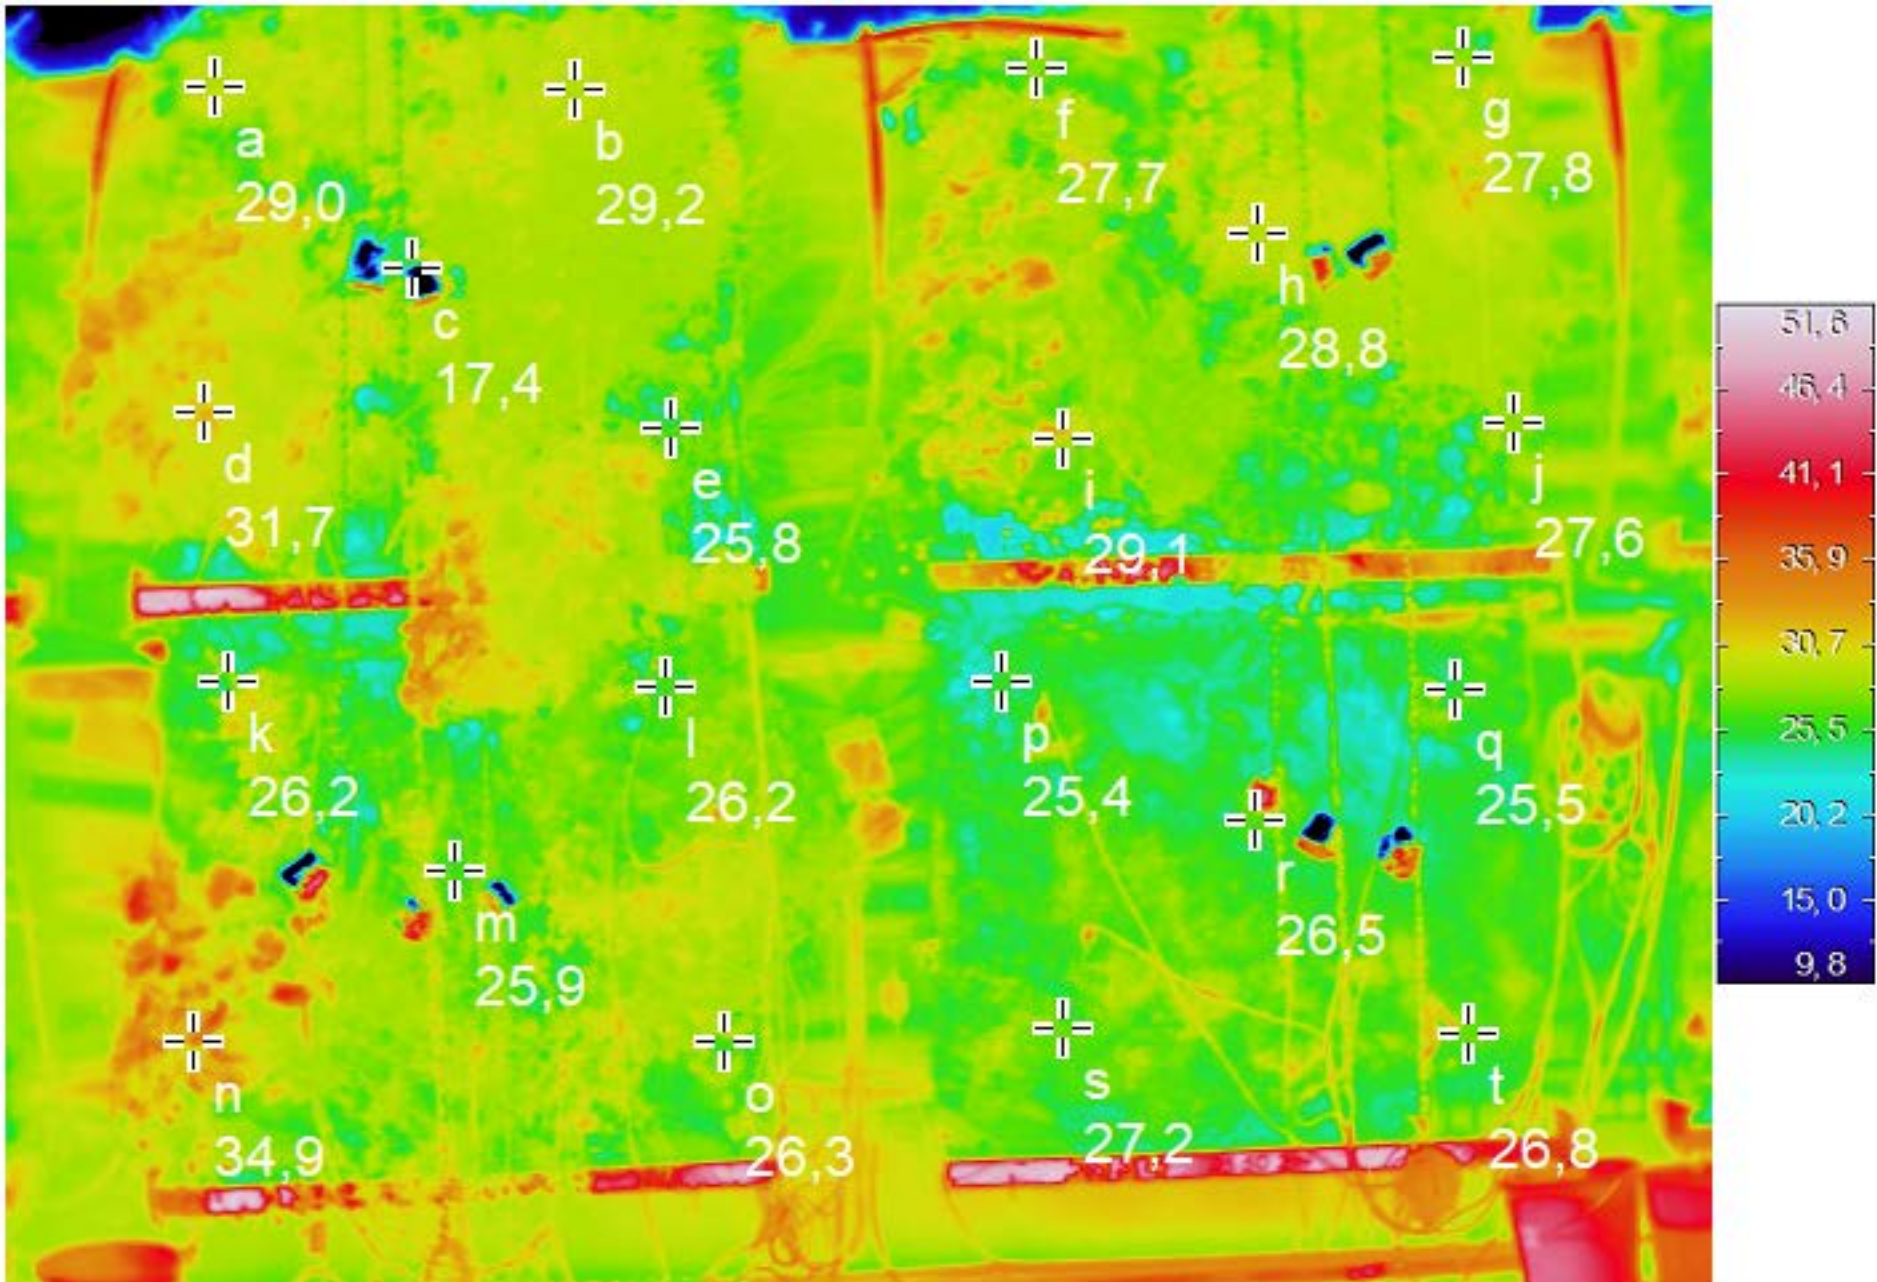

DateinameT02070IR.JPG  
Messtag:2019/06/18  
Messzeit:15:23:12  
Kommentar:  
Kameramodell:R500P  
Range:1[-20,0C-60,0C]  
BildmodusMEDx1,00  
Externes Objektiv:Standard  
Emissionsgrad:1.00  
Ambient Temp: 24,9IC  
IR Bildx1,00



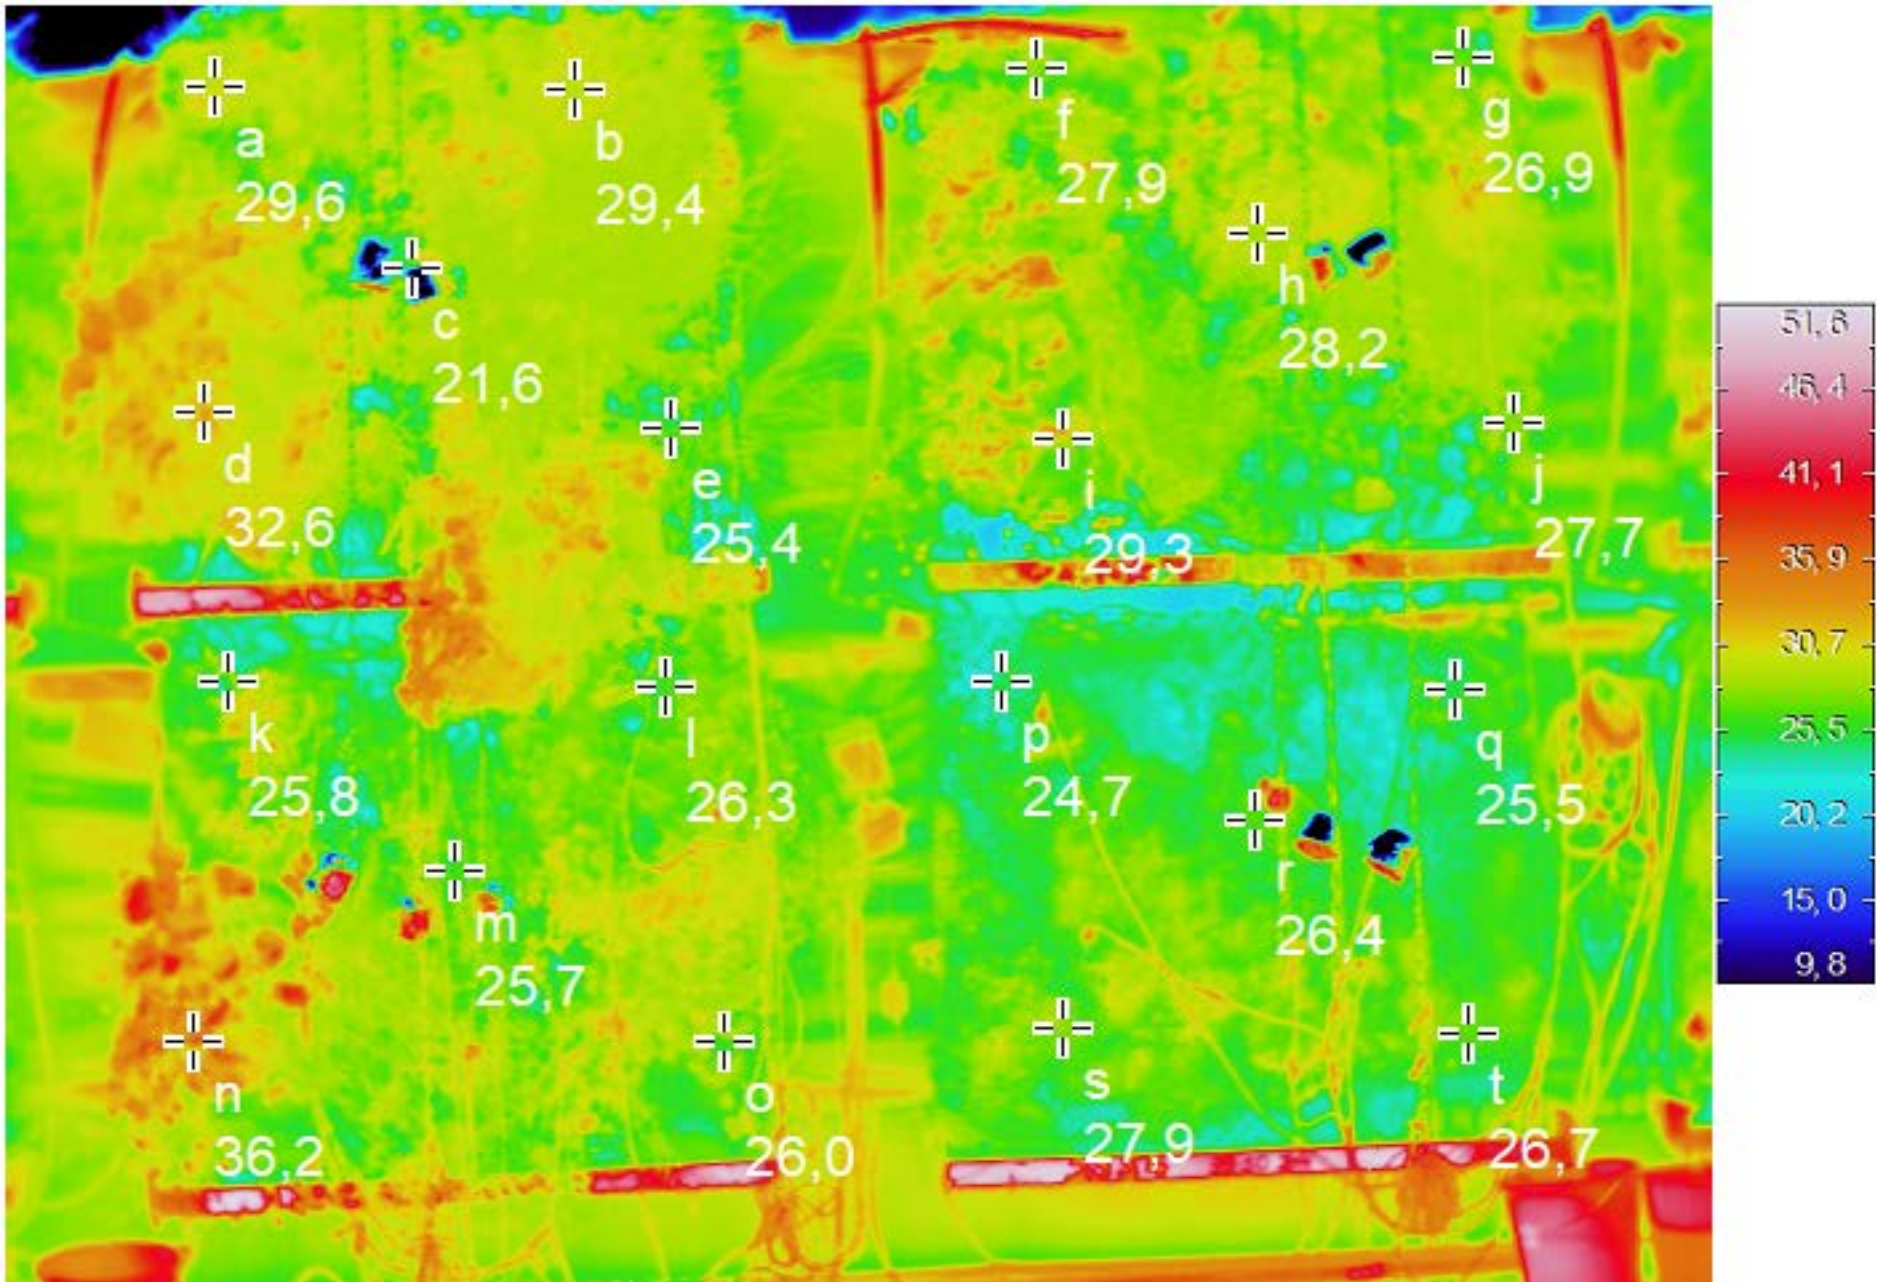

DateinameT02071IR.JPG  
Messtag:2019/06/18  
Messzeit:15:27:12  
Kommentar:  
Kameramodell:R500P  
Range:1[-20,0C-60,0C]  
BildmodusMEDx1,00  
Externes Objektiv:Standard  
Emissionsgrad:1.00  
Ambient Temp: 24,9IC  
IR Bildx1,00



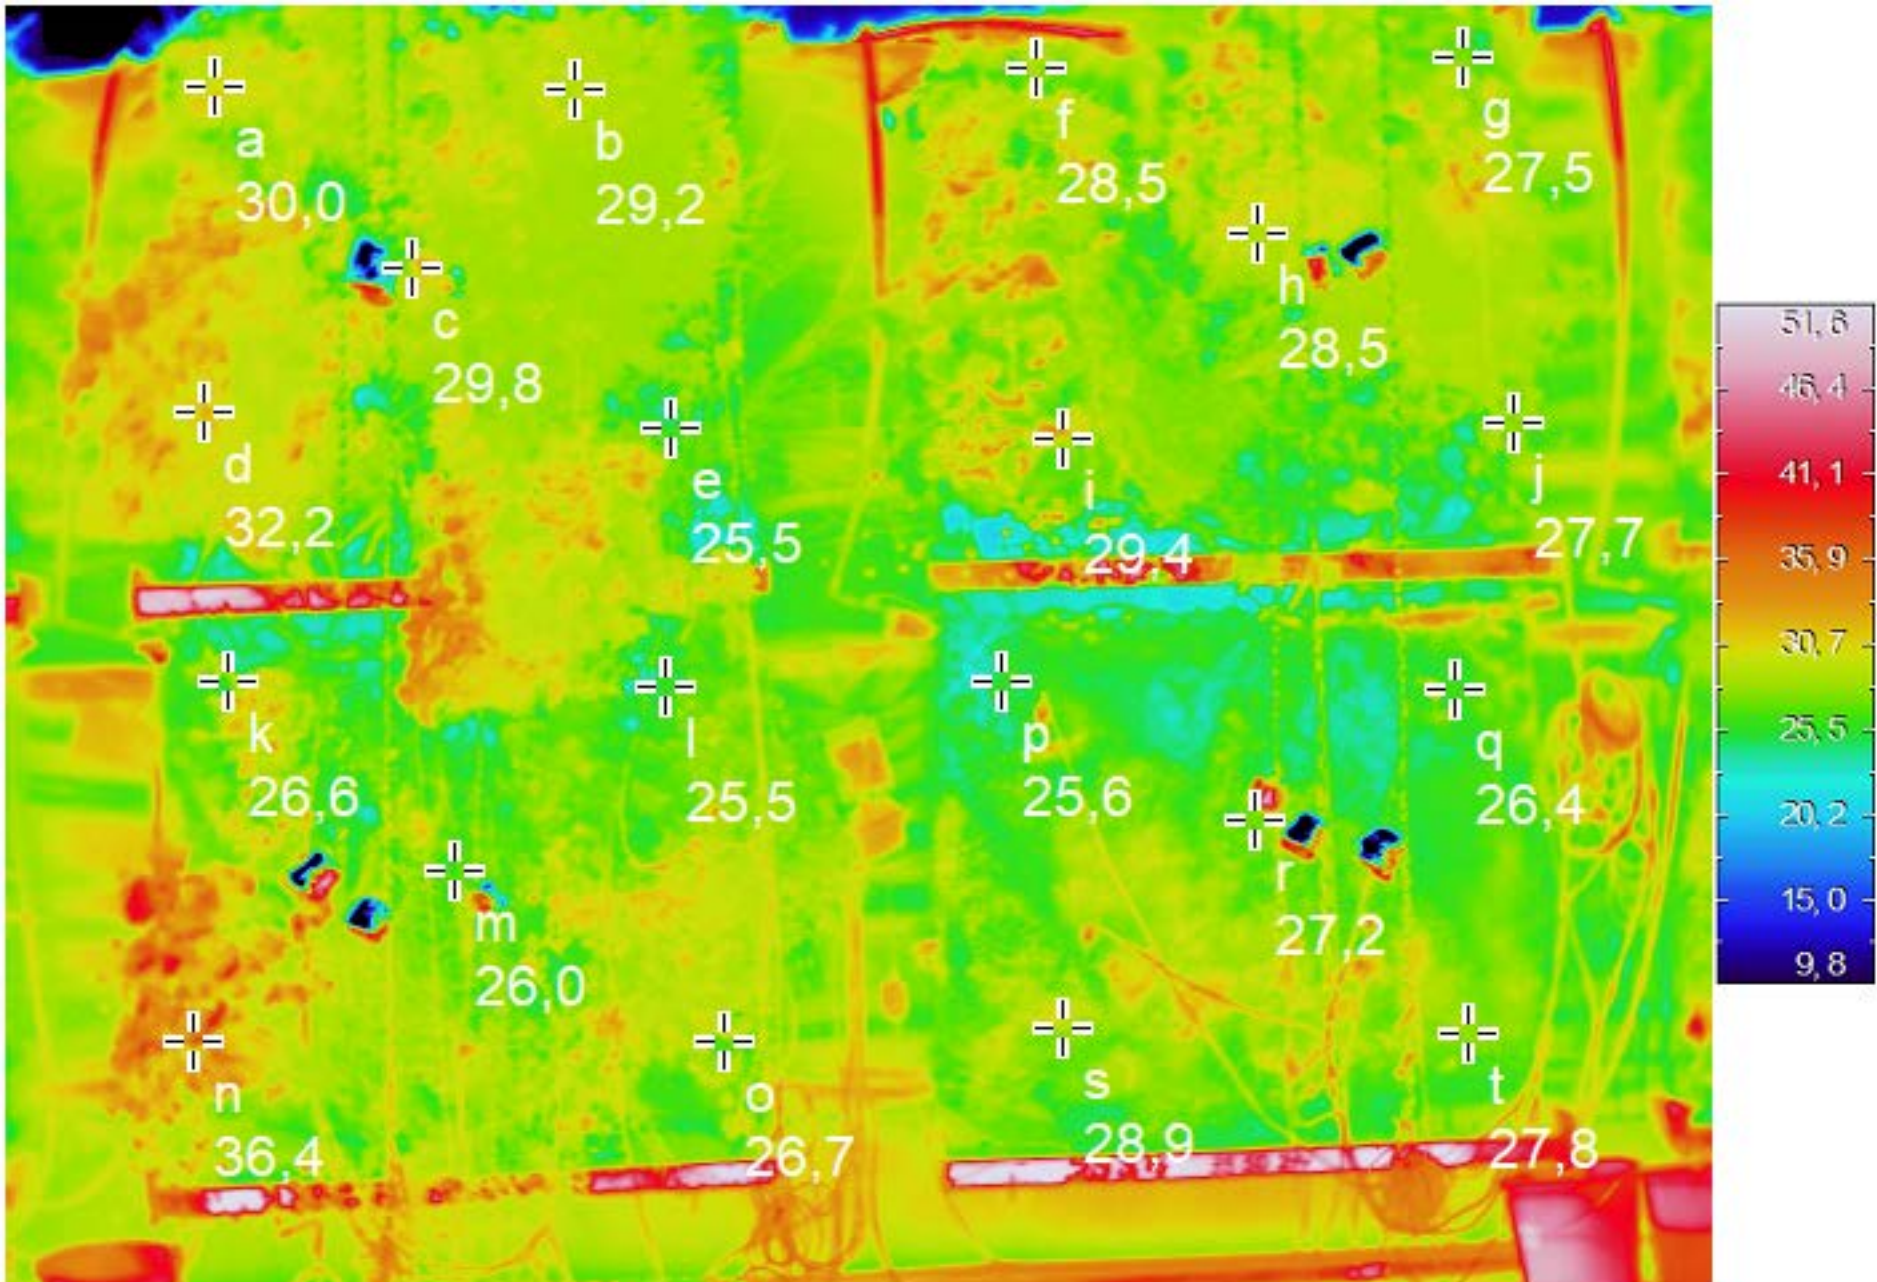

DateinameT02072IR.JPG  
Messtag:2019/06/18  
Messzeit:15:31:12  
Kommentar:  
Kameramodell:R500P  
Range:1[-20,0C-60,0C]  
BildmodusMEDx1,00  
Externes Objektiv:Standard  
Emissionsgrad:1.00  
Ambient Temp: 24,9IC  
IR Bildx1,00



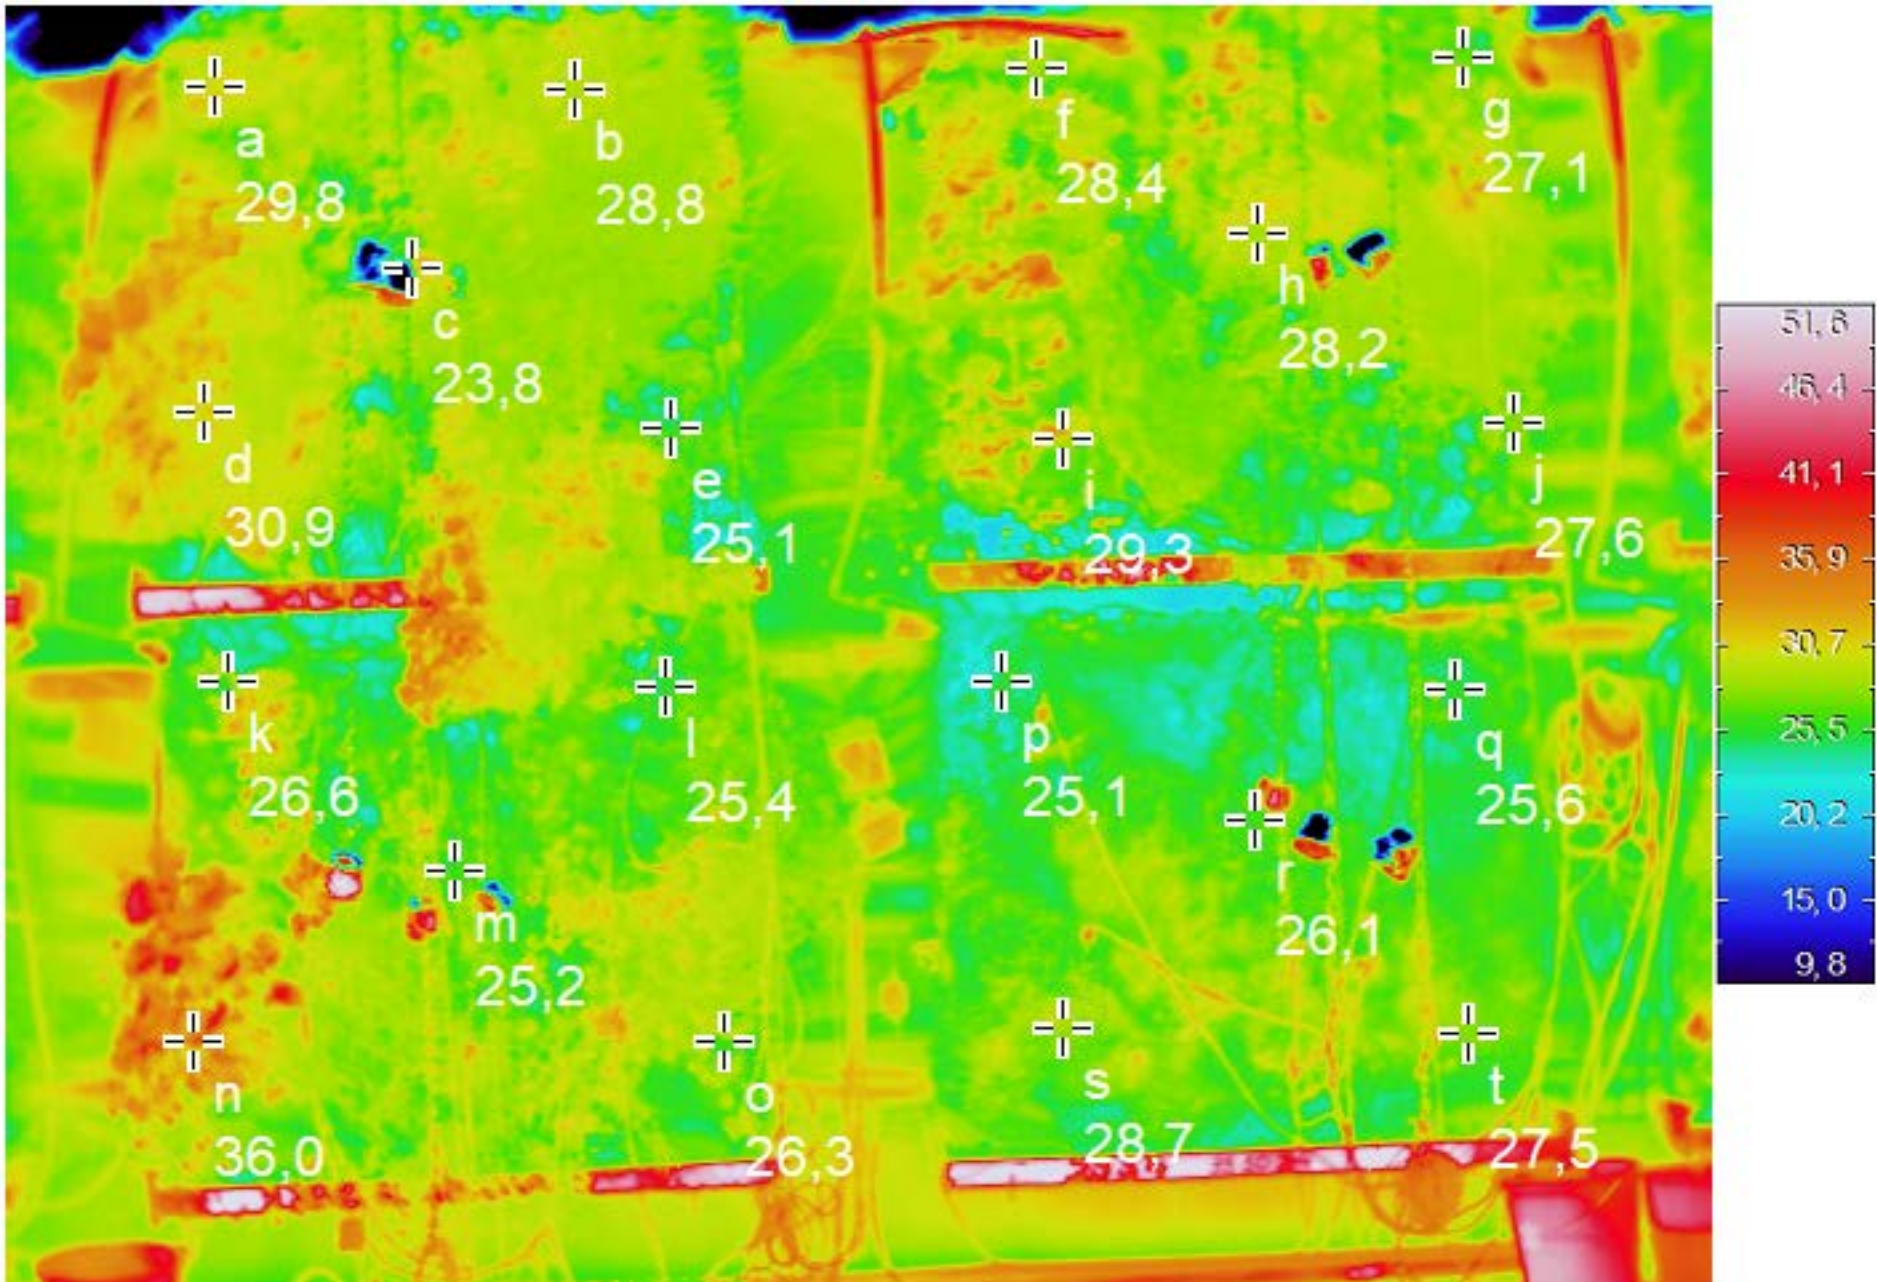

DateinameT02073IR.JPG  
Messtag:2019/06/18  
Messzeit:15:35:12  
Kommentar:  
Kameramodell:R500P  
Range:1[-20,0C-60,0C]  
BildmodusMEDx1,00  
Externes Objektiv:Standard  
Emissionsgrad:1.00  
Ambient Temp: 24,9IC  
IR Bildx1,00



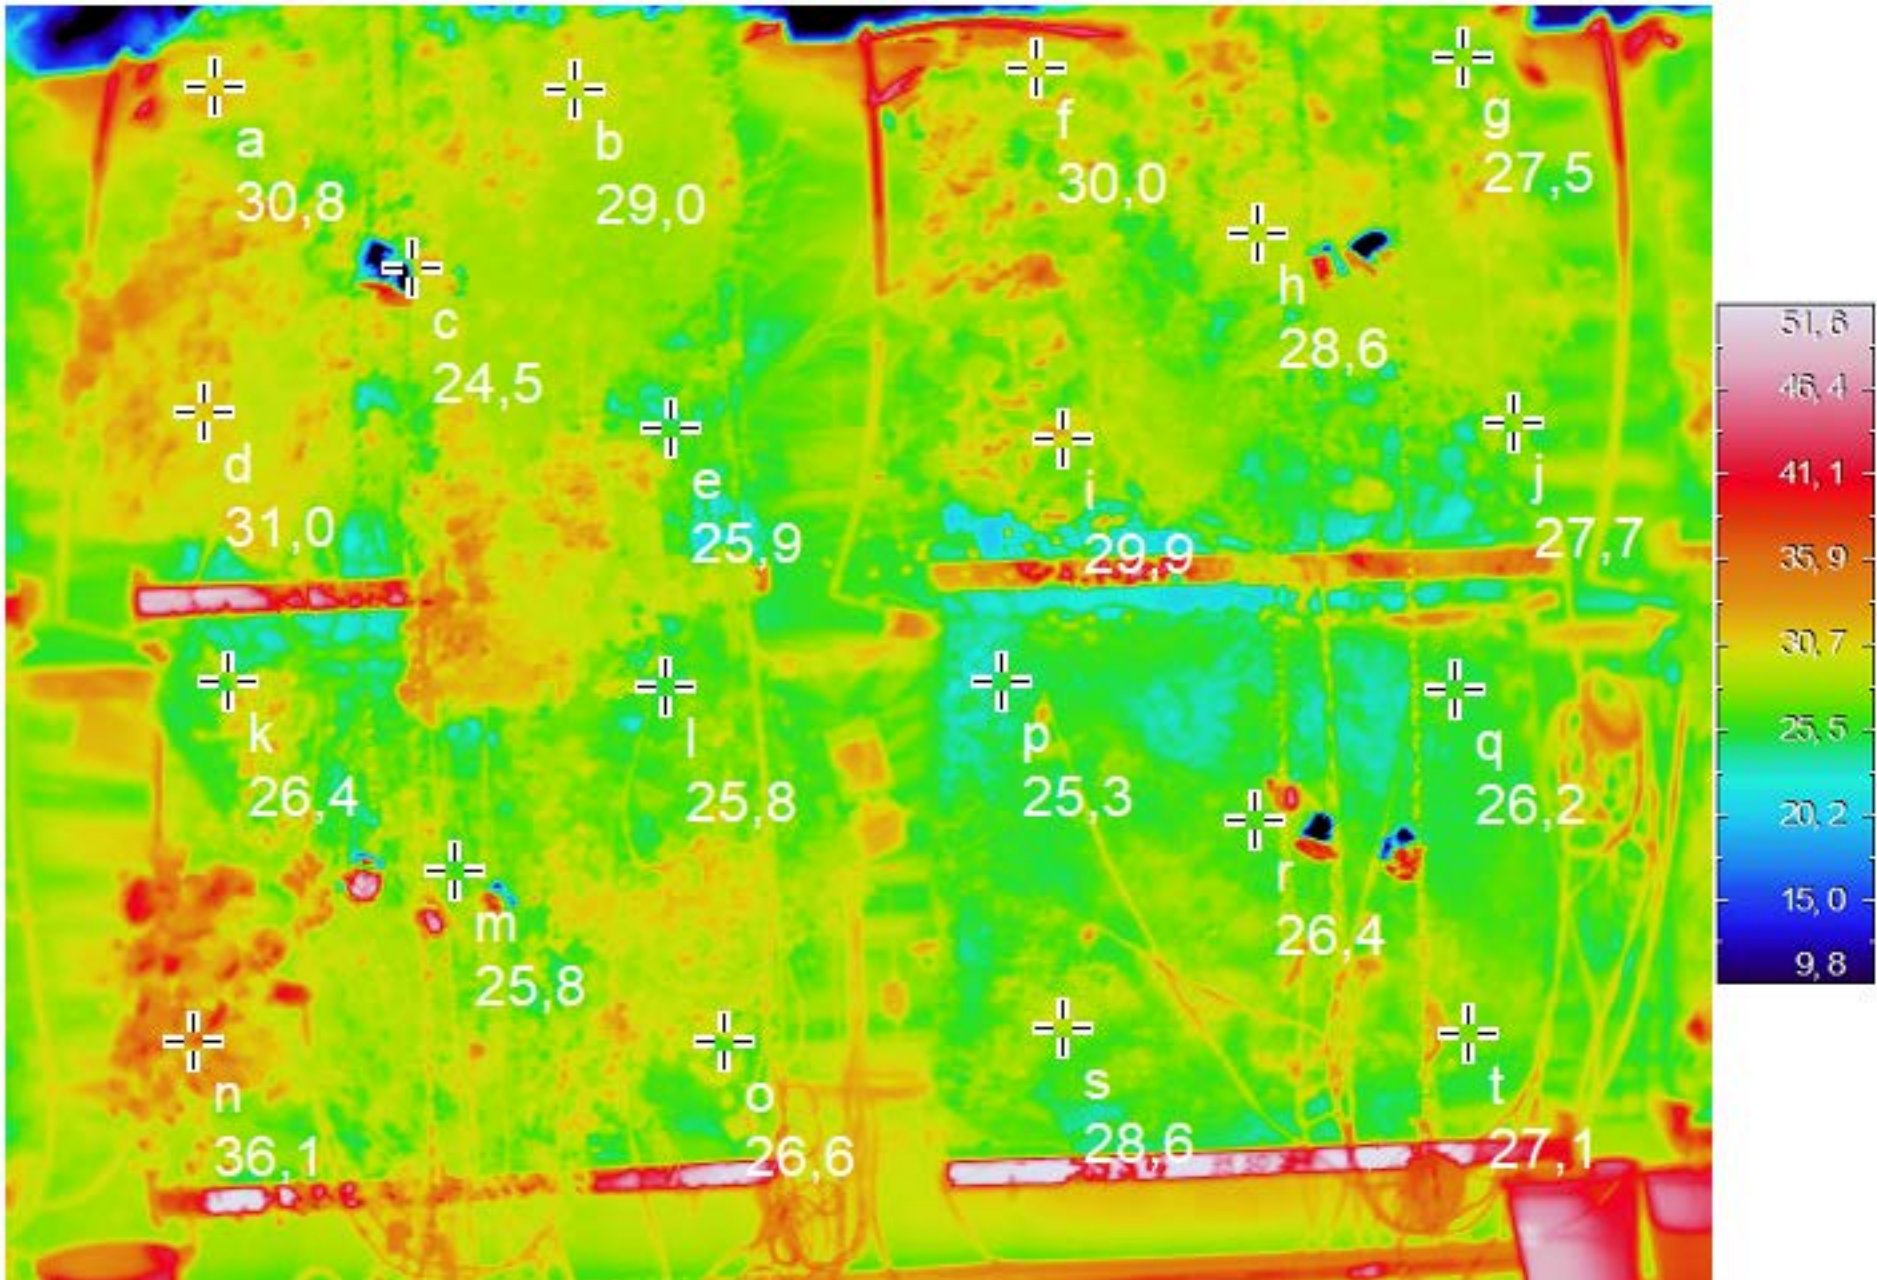

DateinameT02074IR.JPG  
Messtag:2019/06/18  
Messzeit:15:39:12  
Kommentar:  
Kameramodell:R500P  
Range:1[-20,0C-60,0C]  
BildmodusMEDx1,00  
Externes Objektiv:Standard  
Emissionsgrad:1.00  
Ambient Temp: 24,9IC  
IR Bildx1,00



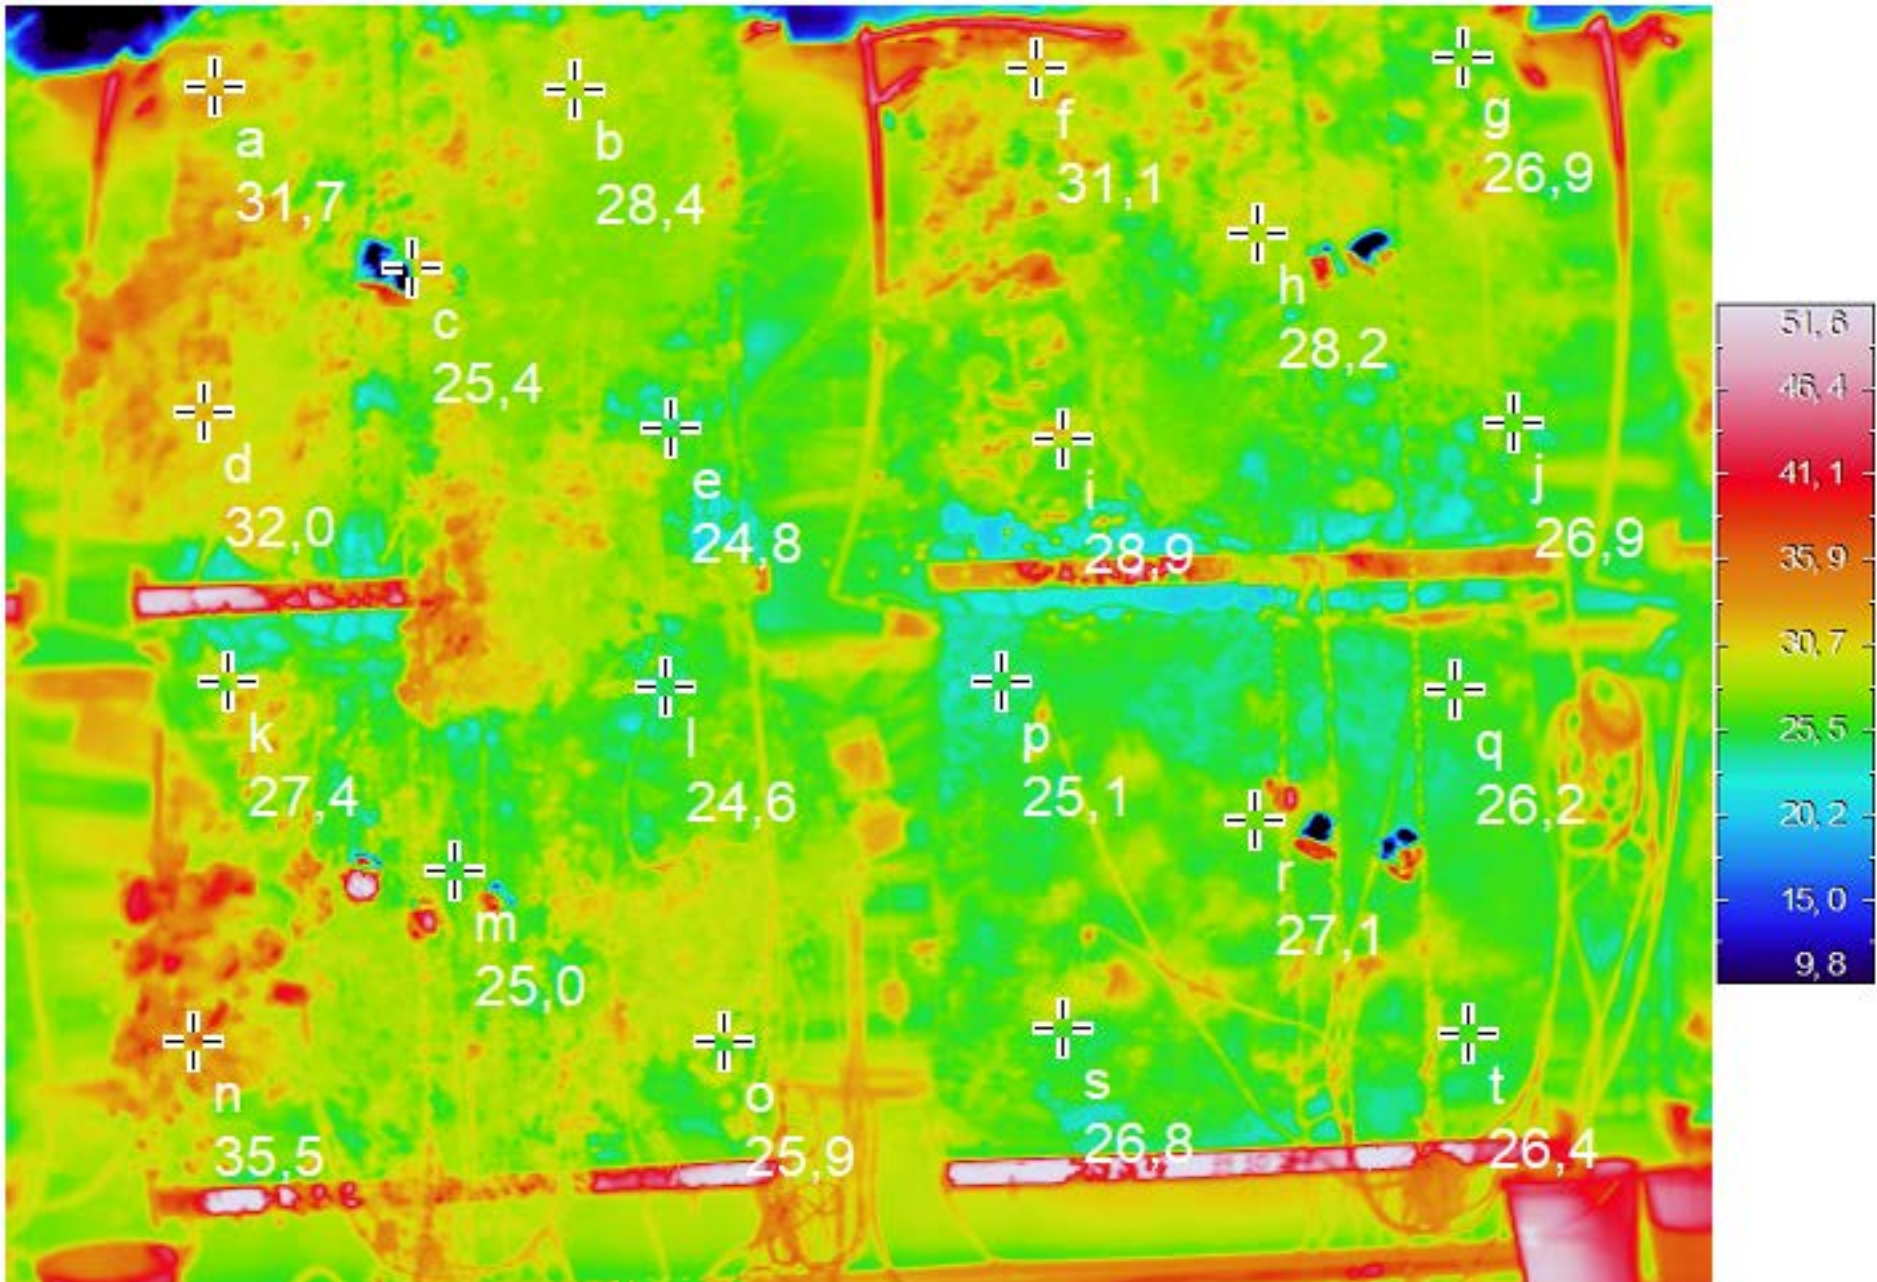

DateinameT02075IR.JPG  
Messtag:2019/06/18  
Messzeit:15:43:12  
Kommentar:  
Kameramodell:R500P  
Range:1[-20,0C-60,0C]  
BildmodusMEDx1,00  
Externes Objektiv:Standard  
Emissionsgrad:1.00  
Ambient Temp: 24,9IC  
IR Bildx1,00



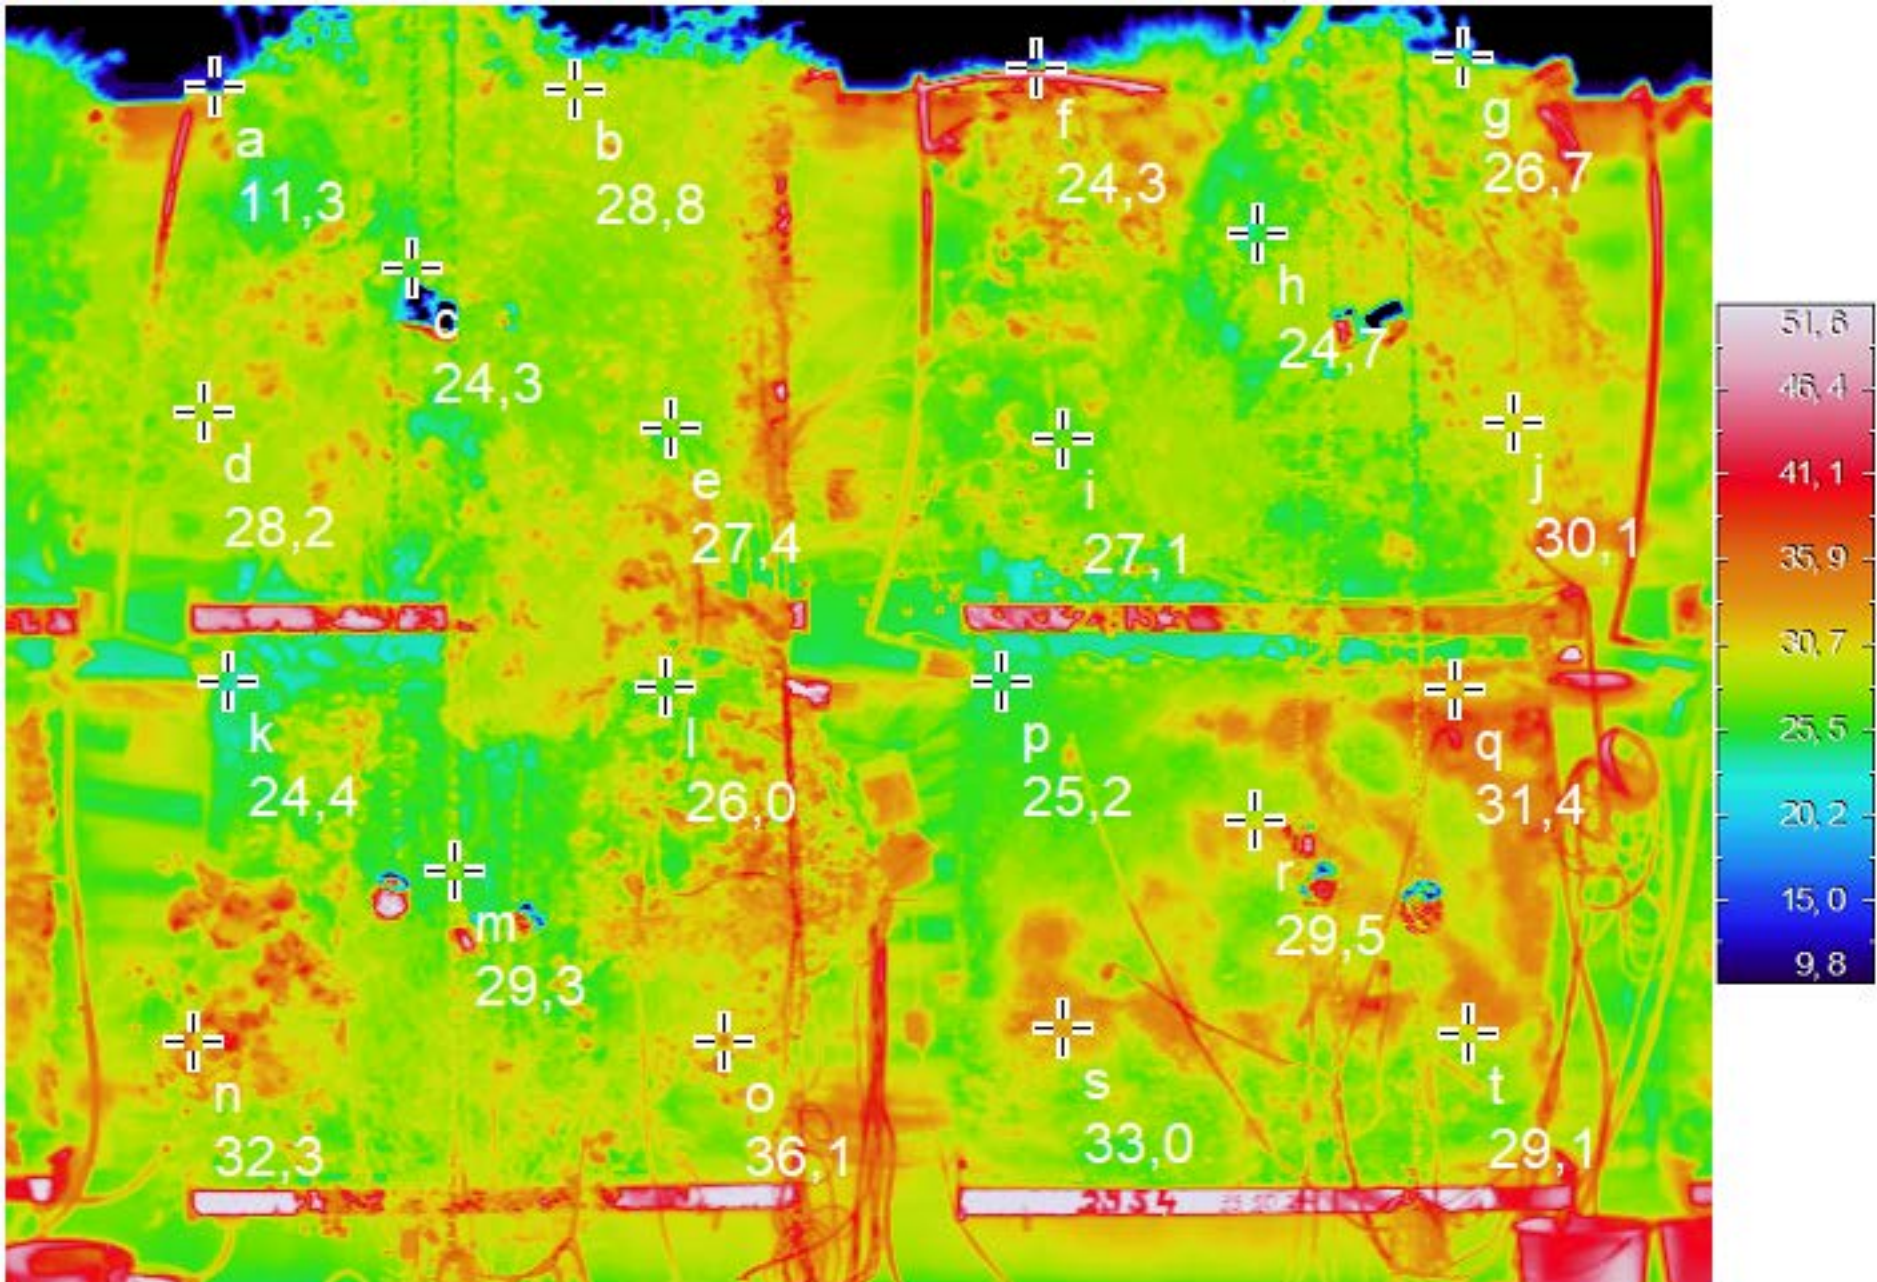

DateinameT02126IR.JPG  
Messtag:2019/06/19  
Messzeit:11:32:16  
Kommentar:  
Kameramodell:R500P  
Range:1[-20,0C-60,0C]  
BildmodusMEDx1,00  
Externes Objektiv:Standard  
Emissionsgrad:1.00  
Ambient Temp: 24,9IC  
IR Bildx1,00



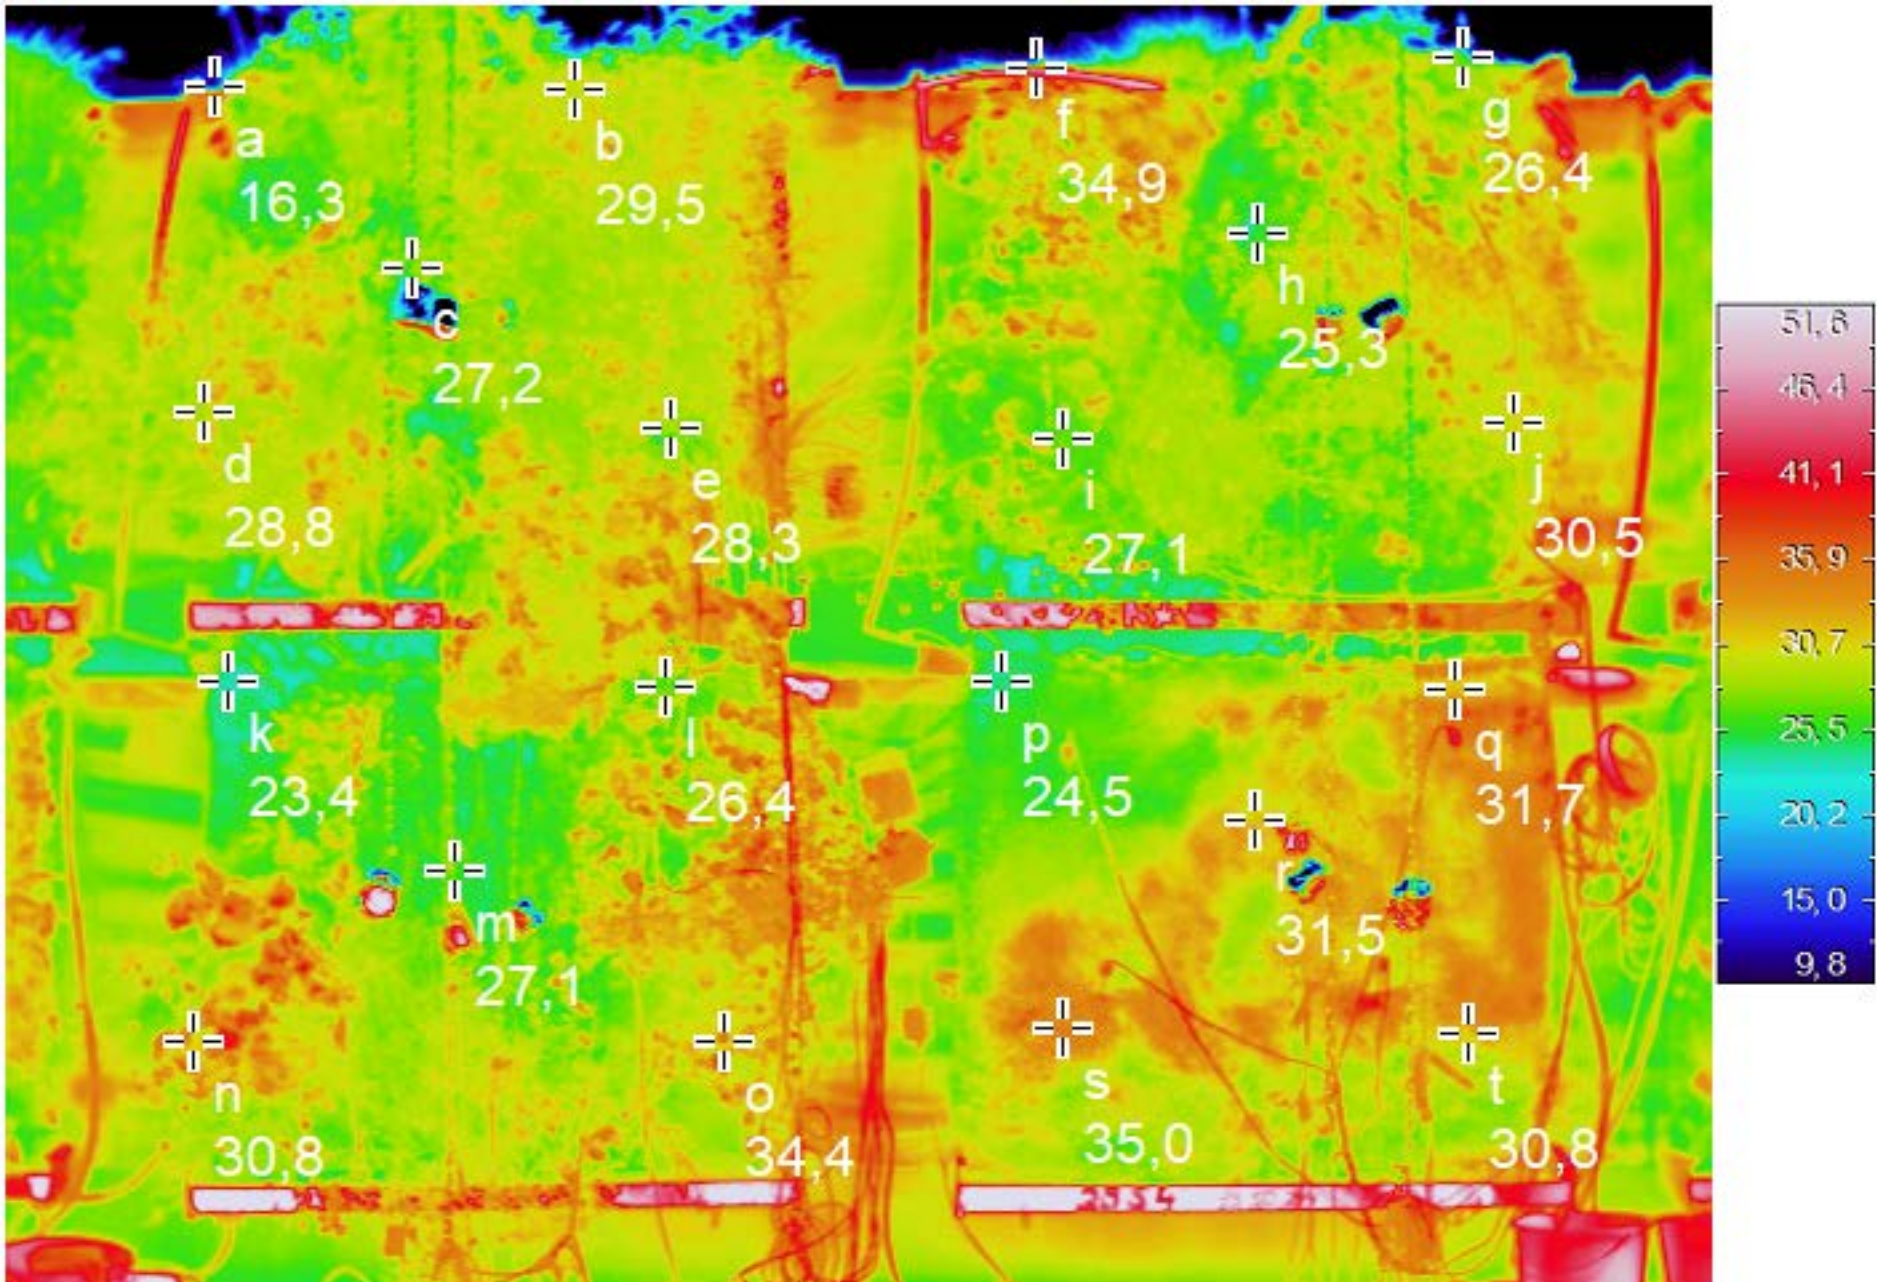

DateinameT02127IR.JPG  
Messtag:2019/06/19  
Messzeit:11:36:16  
Kommentar:  
Kameramodell:R500P  
Range:1[-20,0C-60,0C]  
BildmodusMEDx1,00  
Externes Objektiv:Standard  
Emissionsgrad:1.00  
Ambient Temp: 24,9IC  
IR Bildx1,00



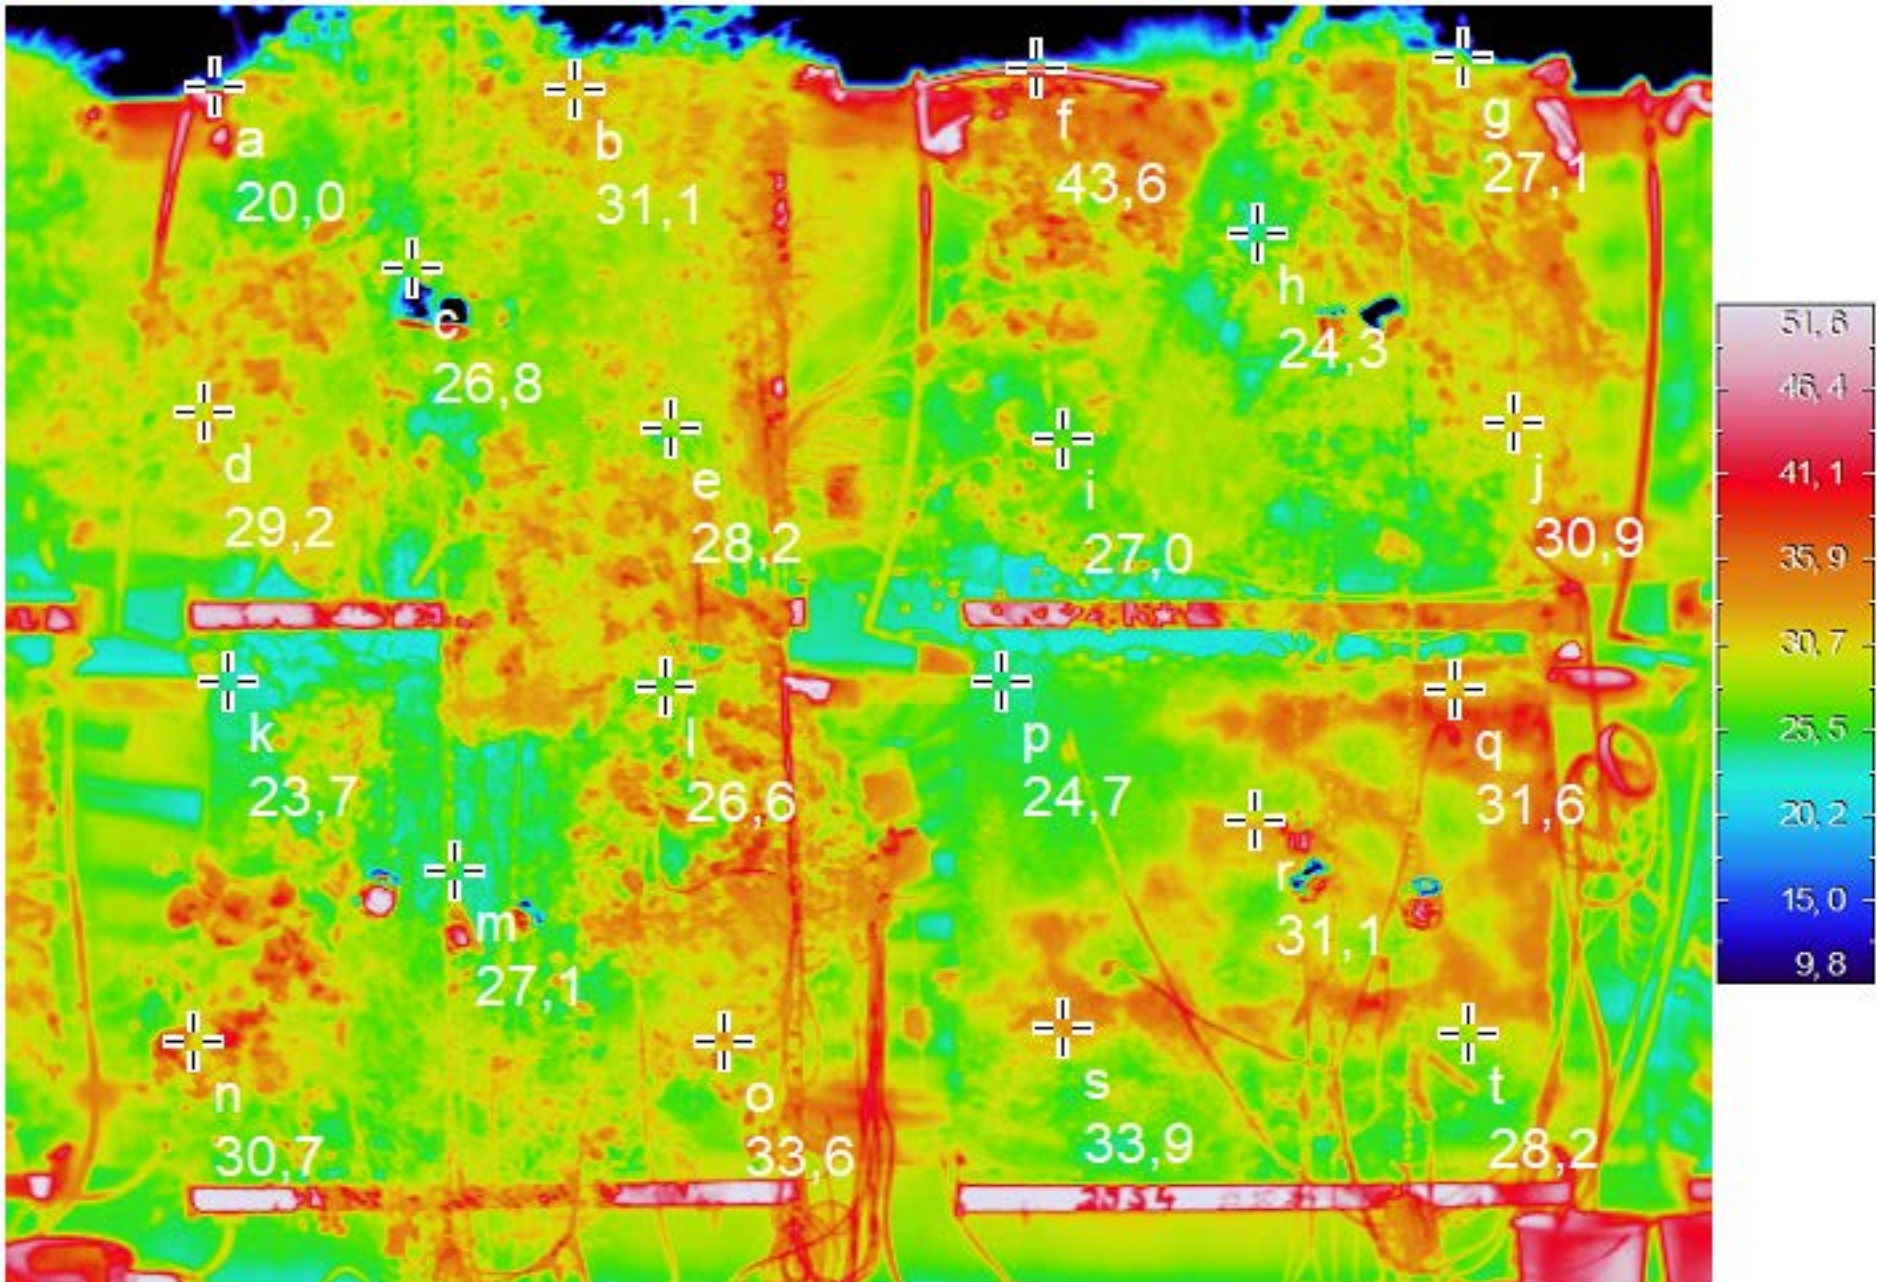

DateinameT02128IR.JPG  
Messtag:2019/06/19  
Messzeit:11:40:16  
Kommentar:  
Kameramodell:R500P  
Range:1[-20,0C-60,0C]  
BildmodusMEDx1,00  
Externes Objektiv:Standard  
Emissionsgrad:1.00  
Ambient Temp: 24,9IC  
IR Bildx1,00



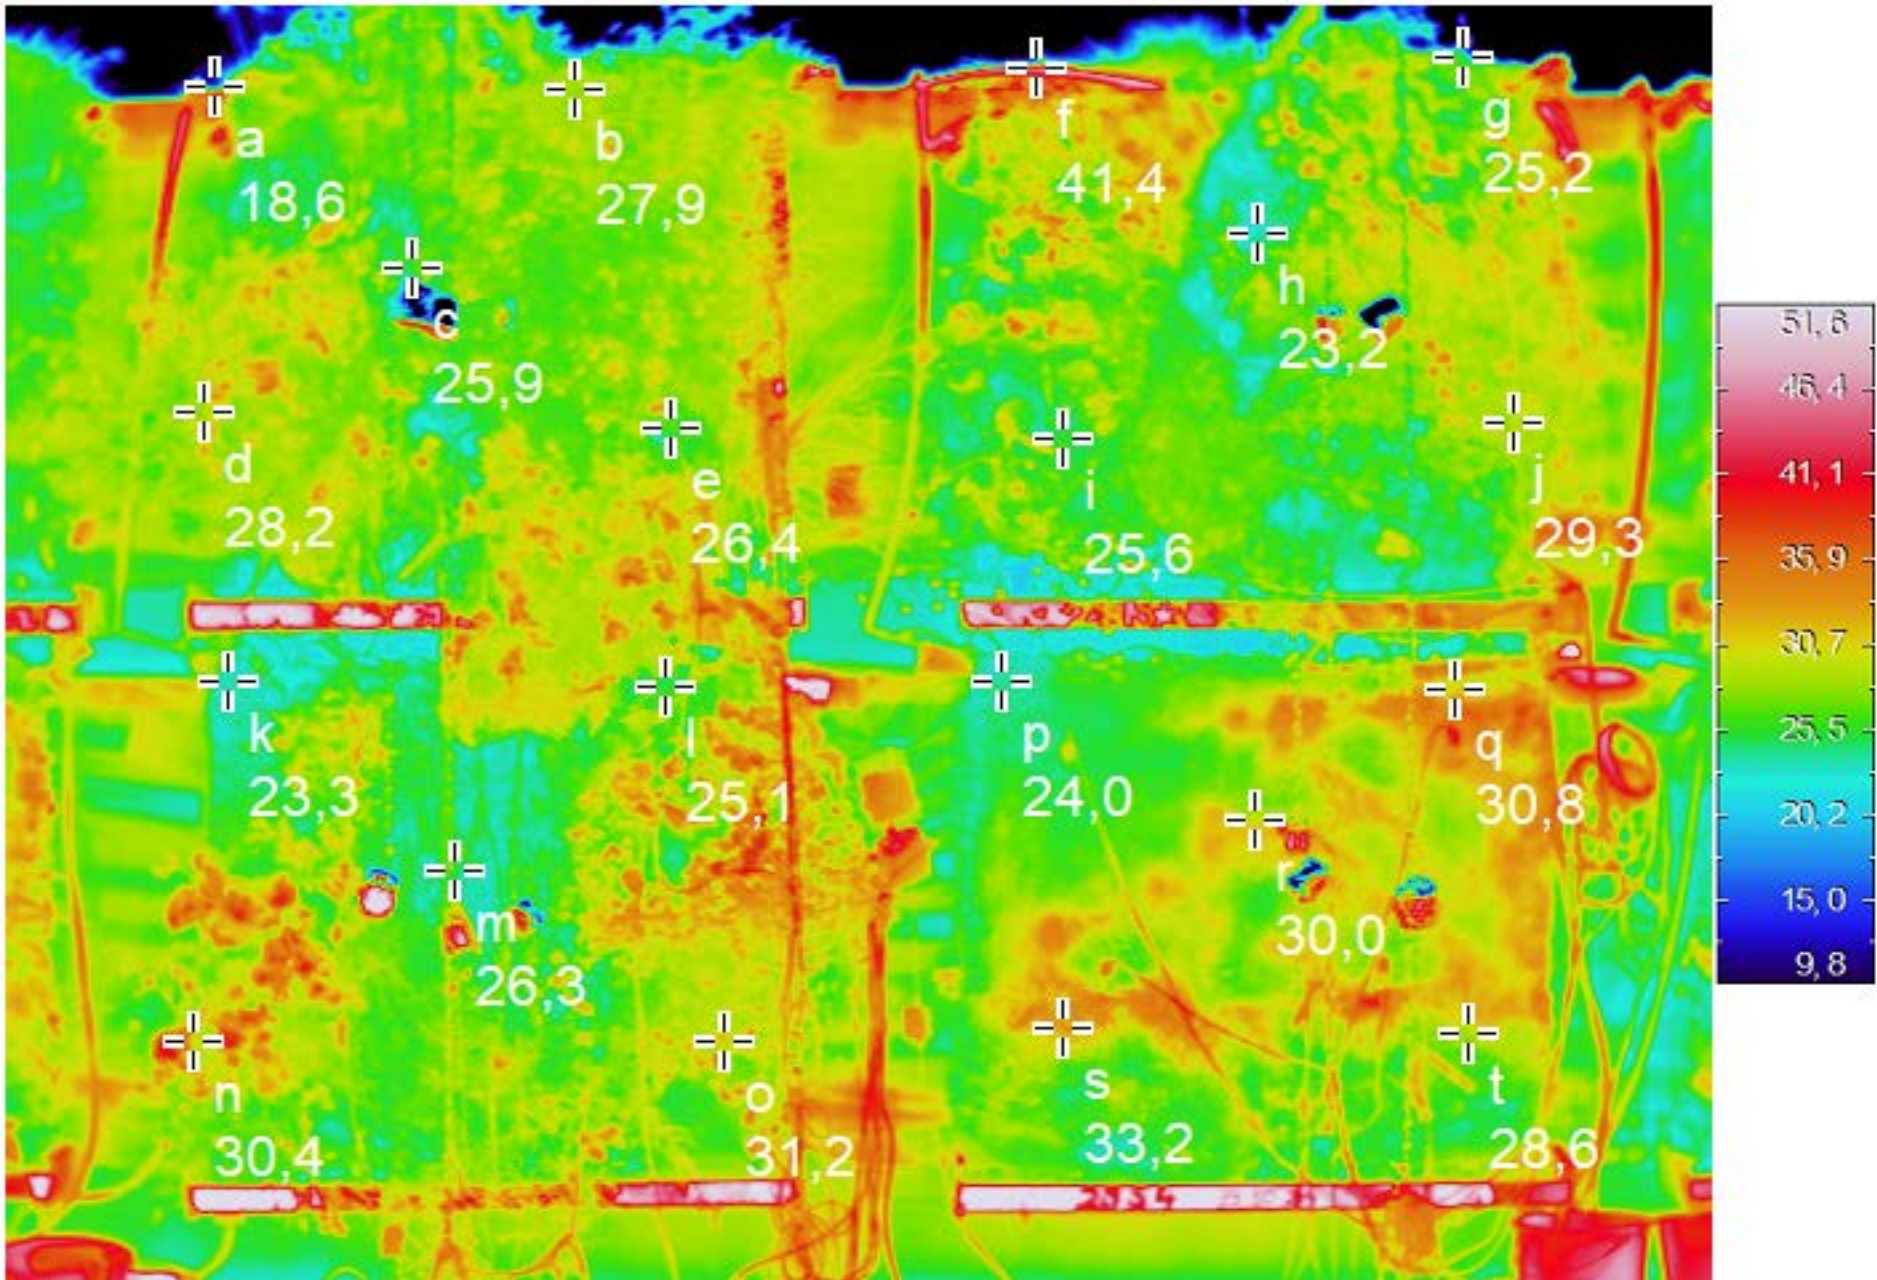

DateinameT02129IR.JPG  
Messtag:2019/06/19  
Messzeit:11:44:16  
Kommentar:  
Kameramodell:R500P  
Range:1[-20,0C-60,0C]  
BildmodusMEDx1,00  
Externes Objektiv:Standard  
Emissionsgrad:1.00  
Ambient Temp: 24,9IC  
IR Bildx1,00



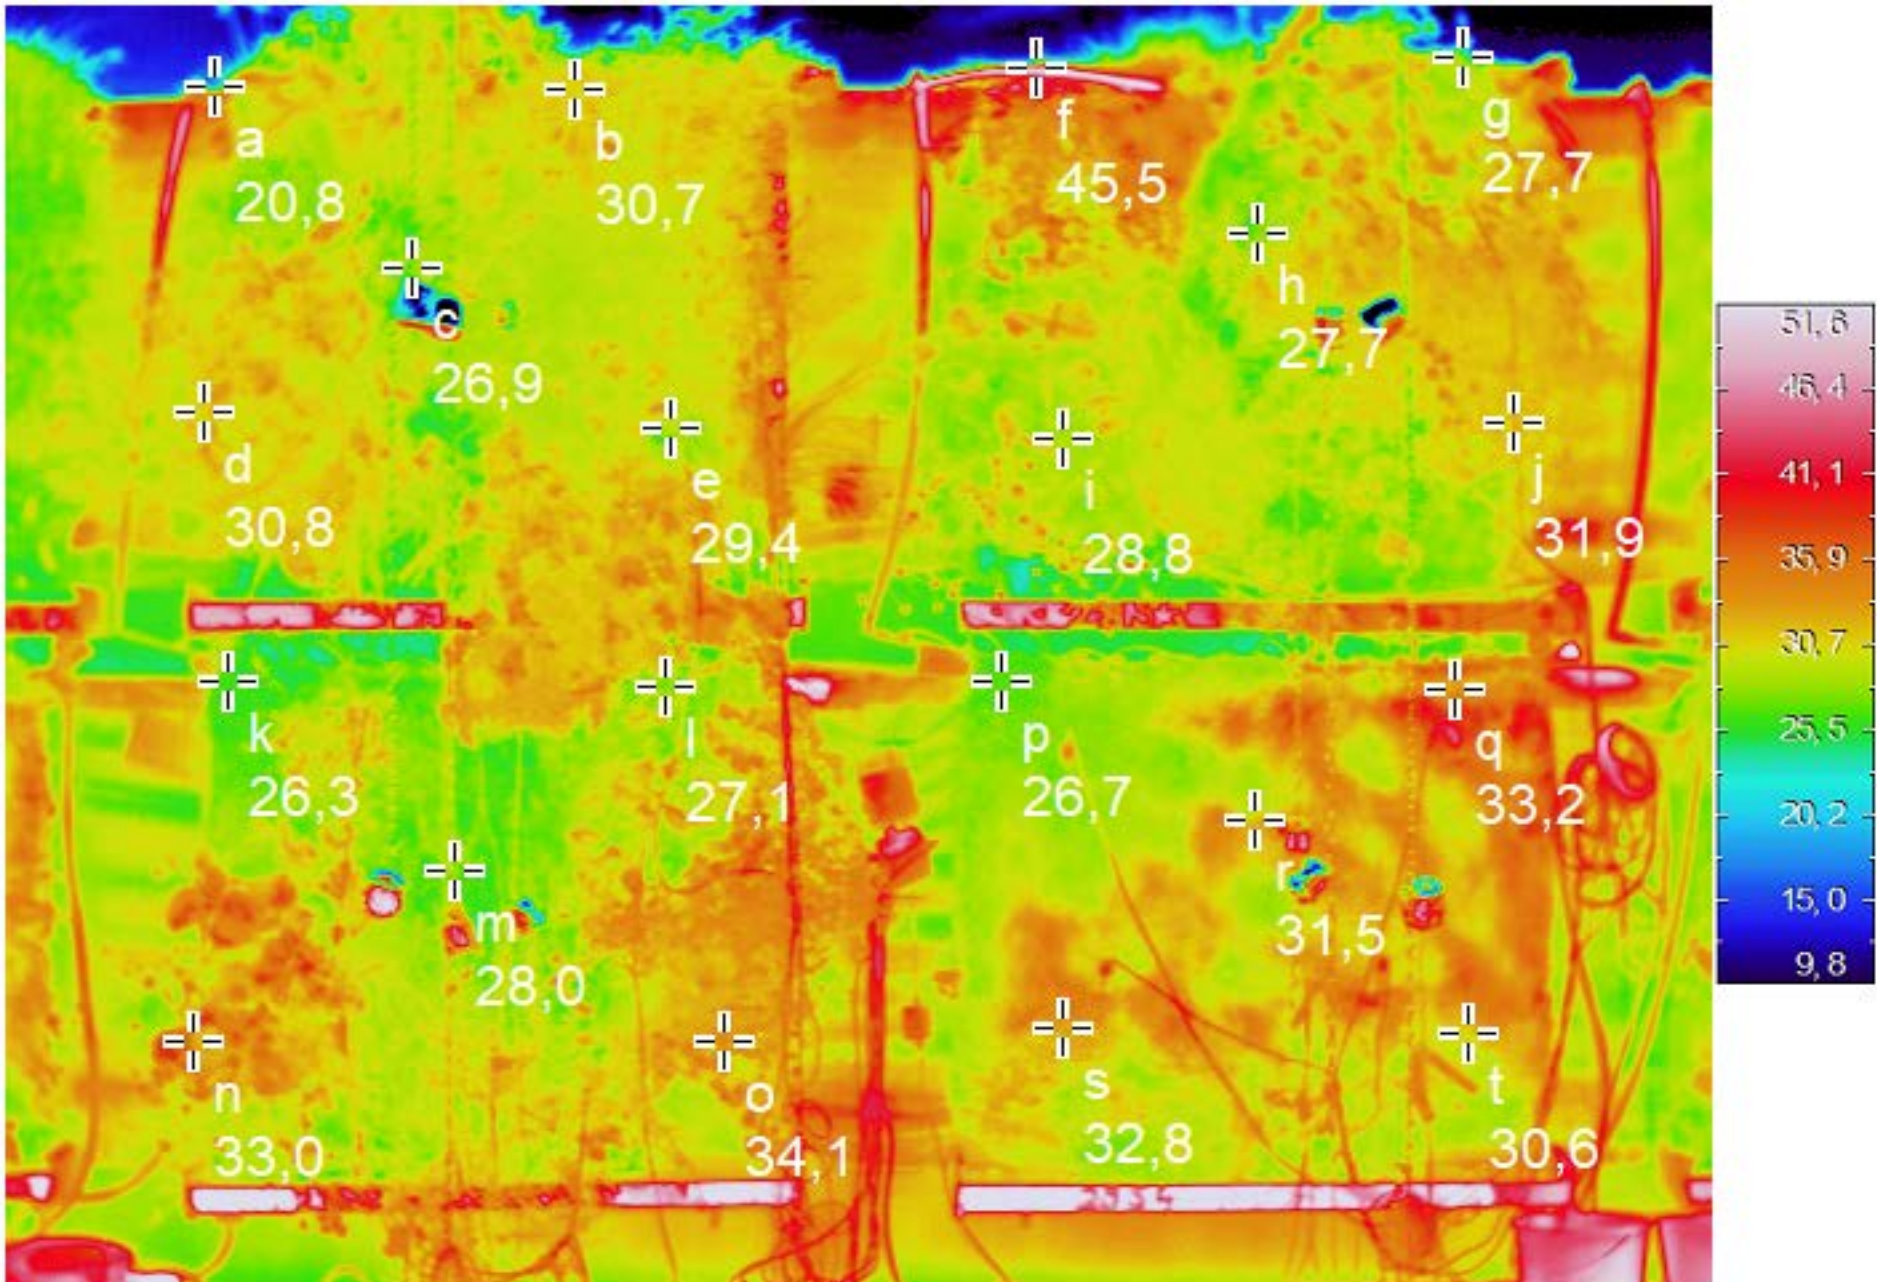

DateinameT02130IR.JPG  
Messtag:2019/06/19  
Messzeit:11:48:16  
Kommentar:  
Kameramodell:R500P  
Range:1[-20,0C-60,0C]  
BildmodusMEDx1,00  
Externes Objektiv:Standard  
Emissionsgrad:1.00  
Ambient Temp: 24,9IC  
IR Bildx1,00



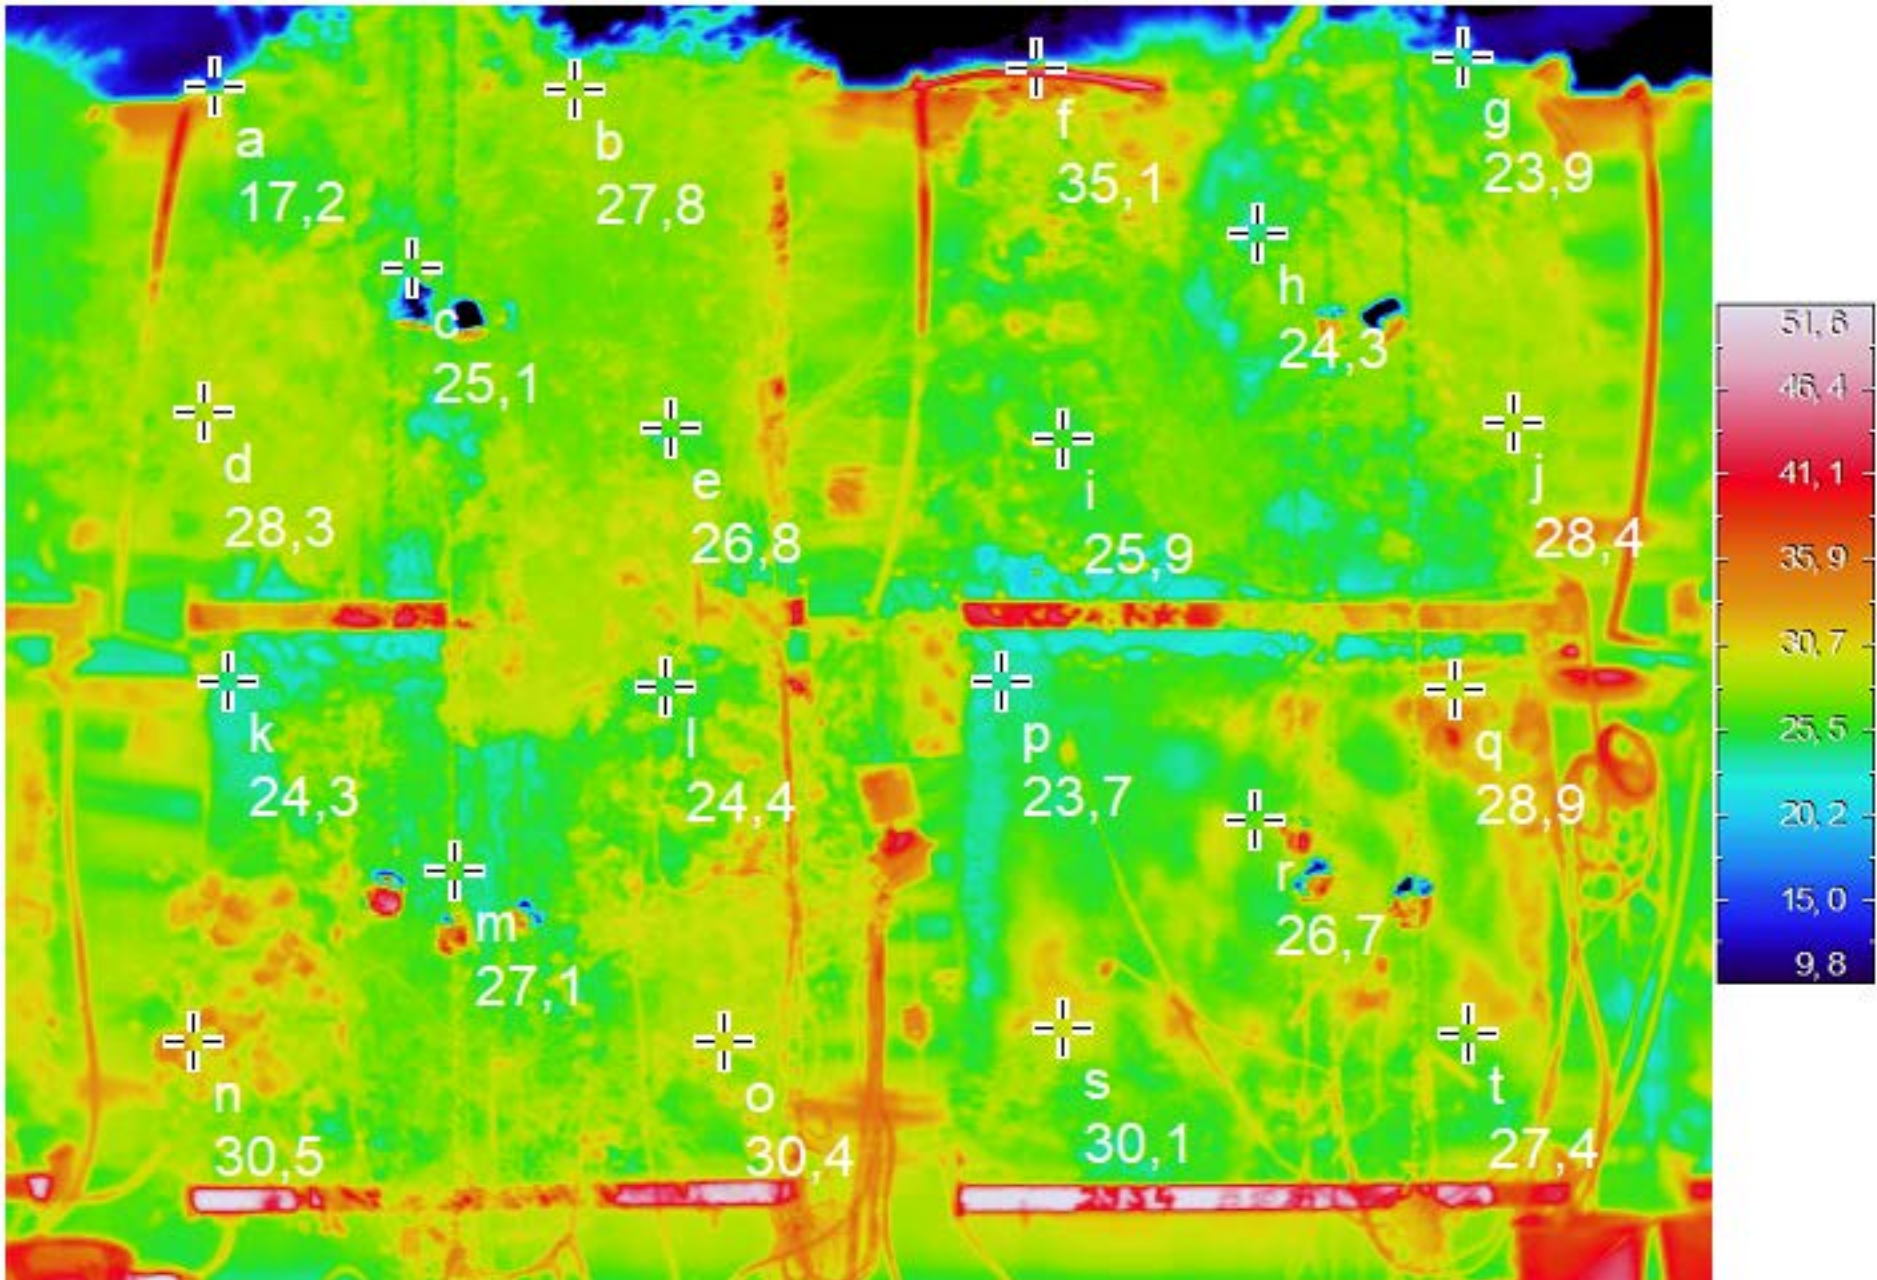

DateinameT02131IR.JPG  
Messtag:2019/06/19  
Messzeit:11:52:16  
Kommentar:  
Kameramodell:R500P  
Range:1[-20,0C-60,0C]  
BildmodusMEDx1,00  
Externes Objektiv:Standard  
Emissionsgrad:1.00  
Ambient Temp: 24,9IC  
IR Bildx1,00



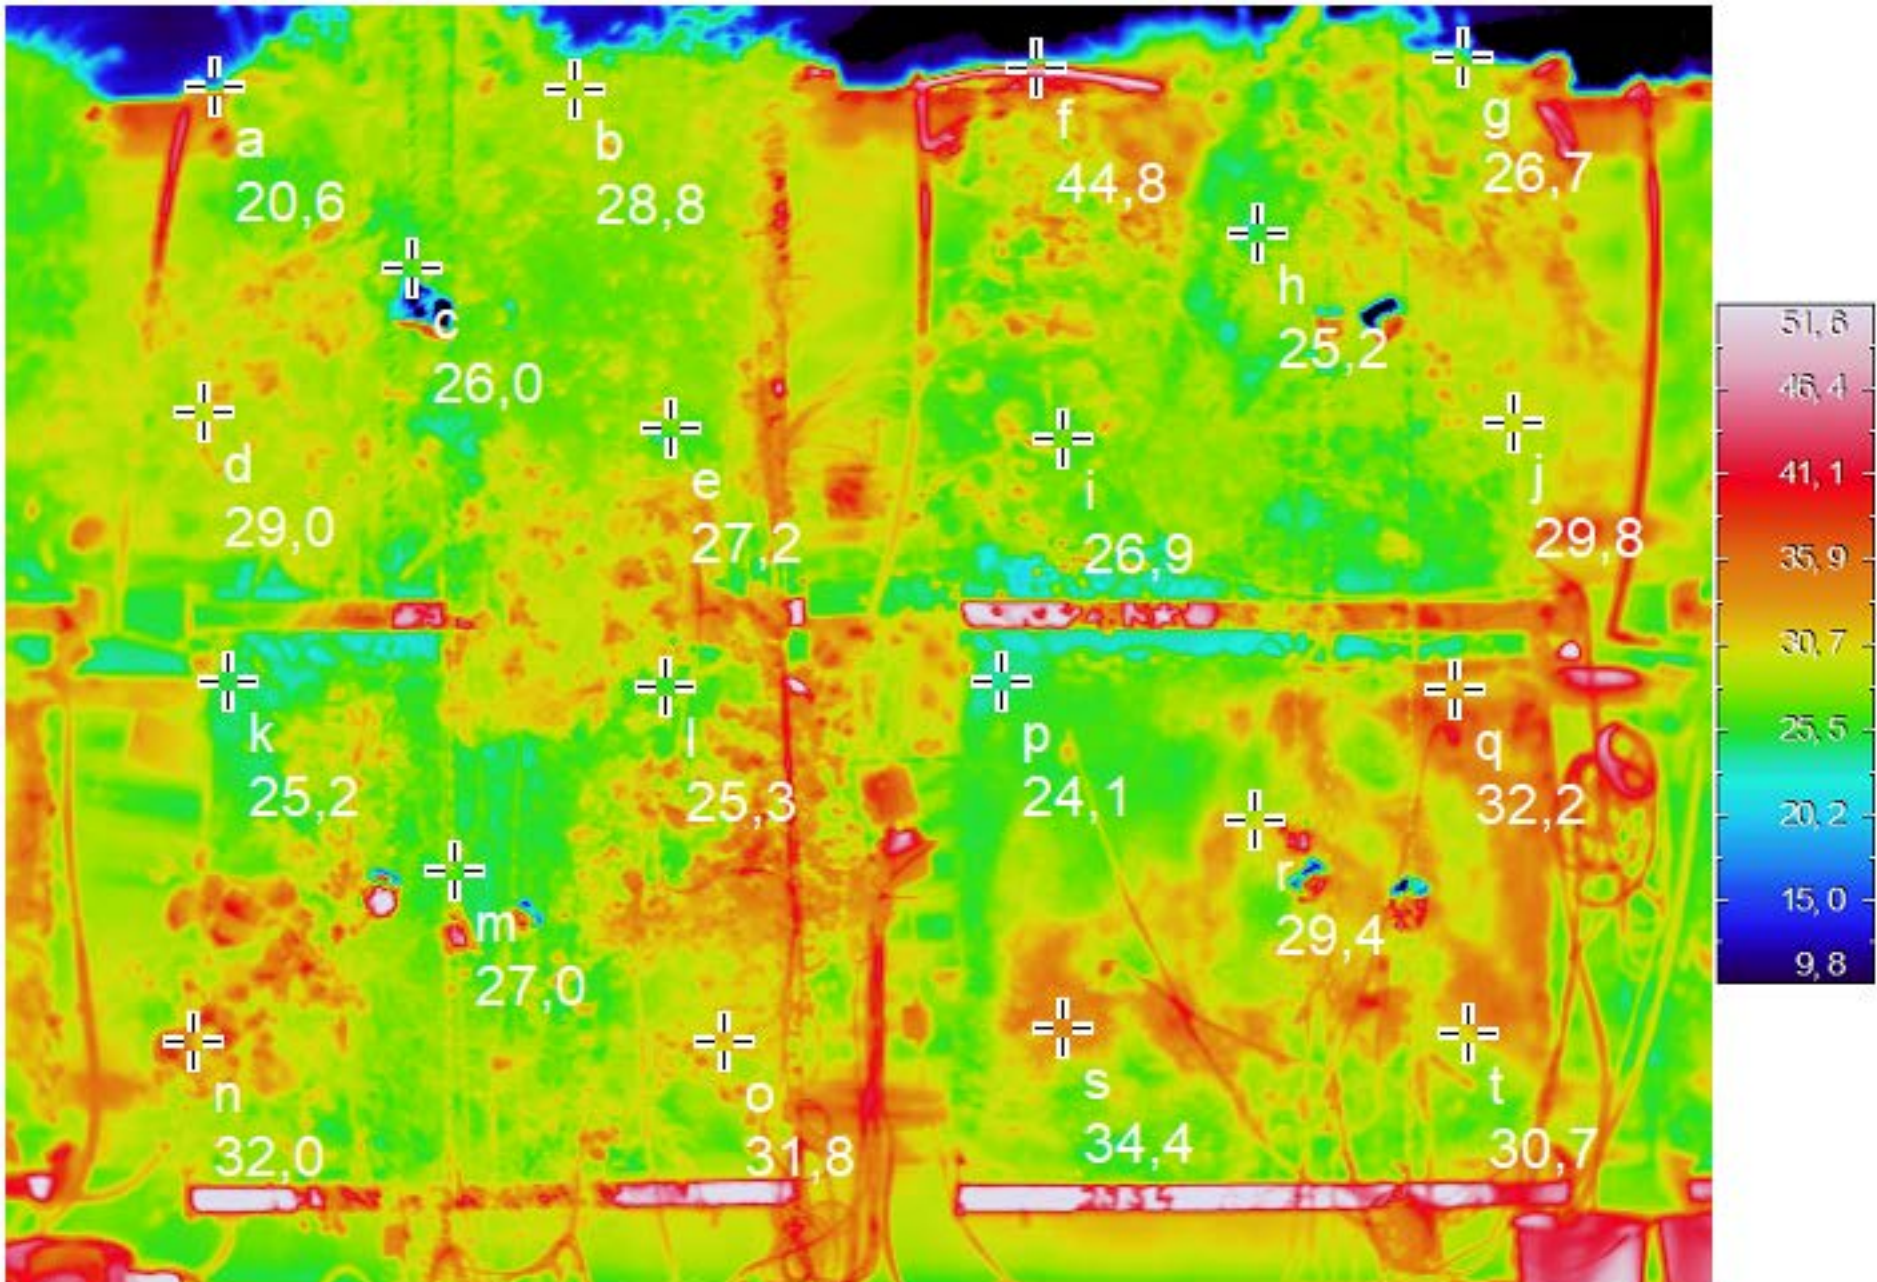

DateinameT02132IR.JPG  
Messtag:2019/06/19  
Messzeit:11:56:16  
Kommentar:  
Kameramodell:R500P  
Range:1[-20,0C-60,0C]  
BildmodusMEDx1,00  
Externes Objektiv:Standard  
Emissionsgrad:1.00  
Ambient Temp: 24,9IC  
IR Bildx1,00



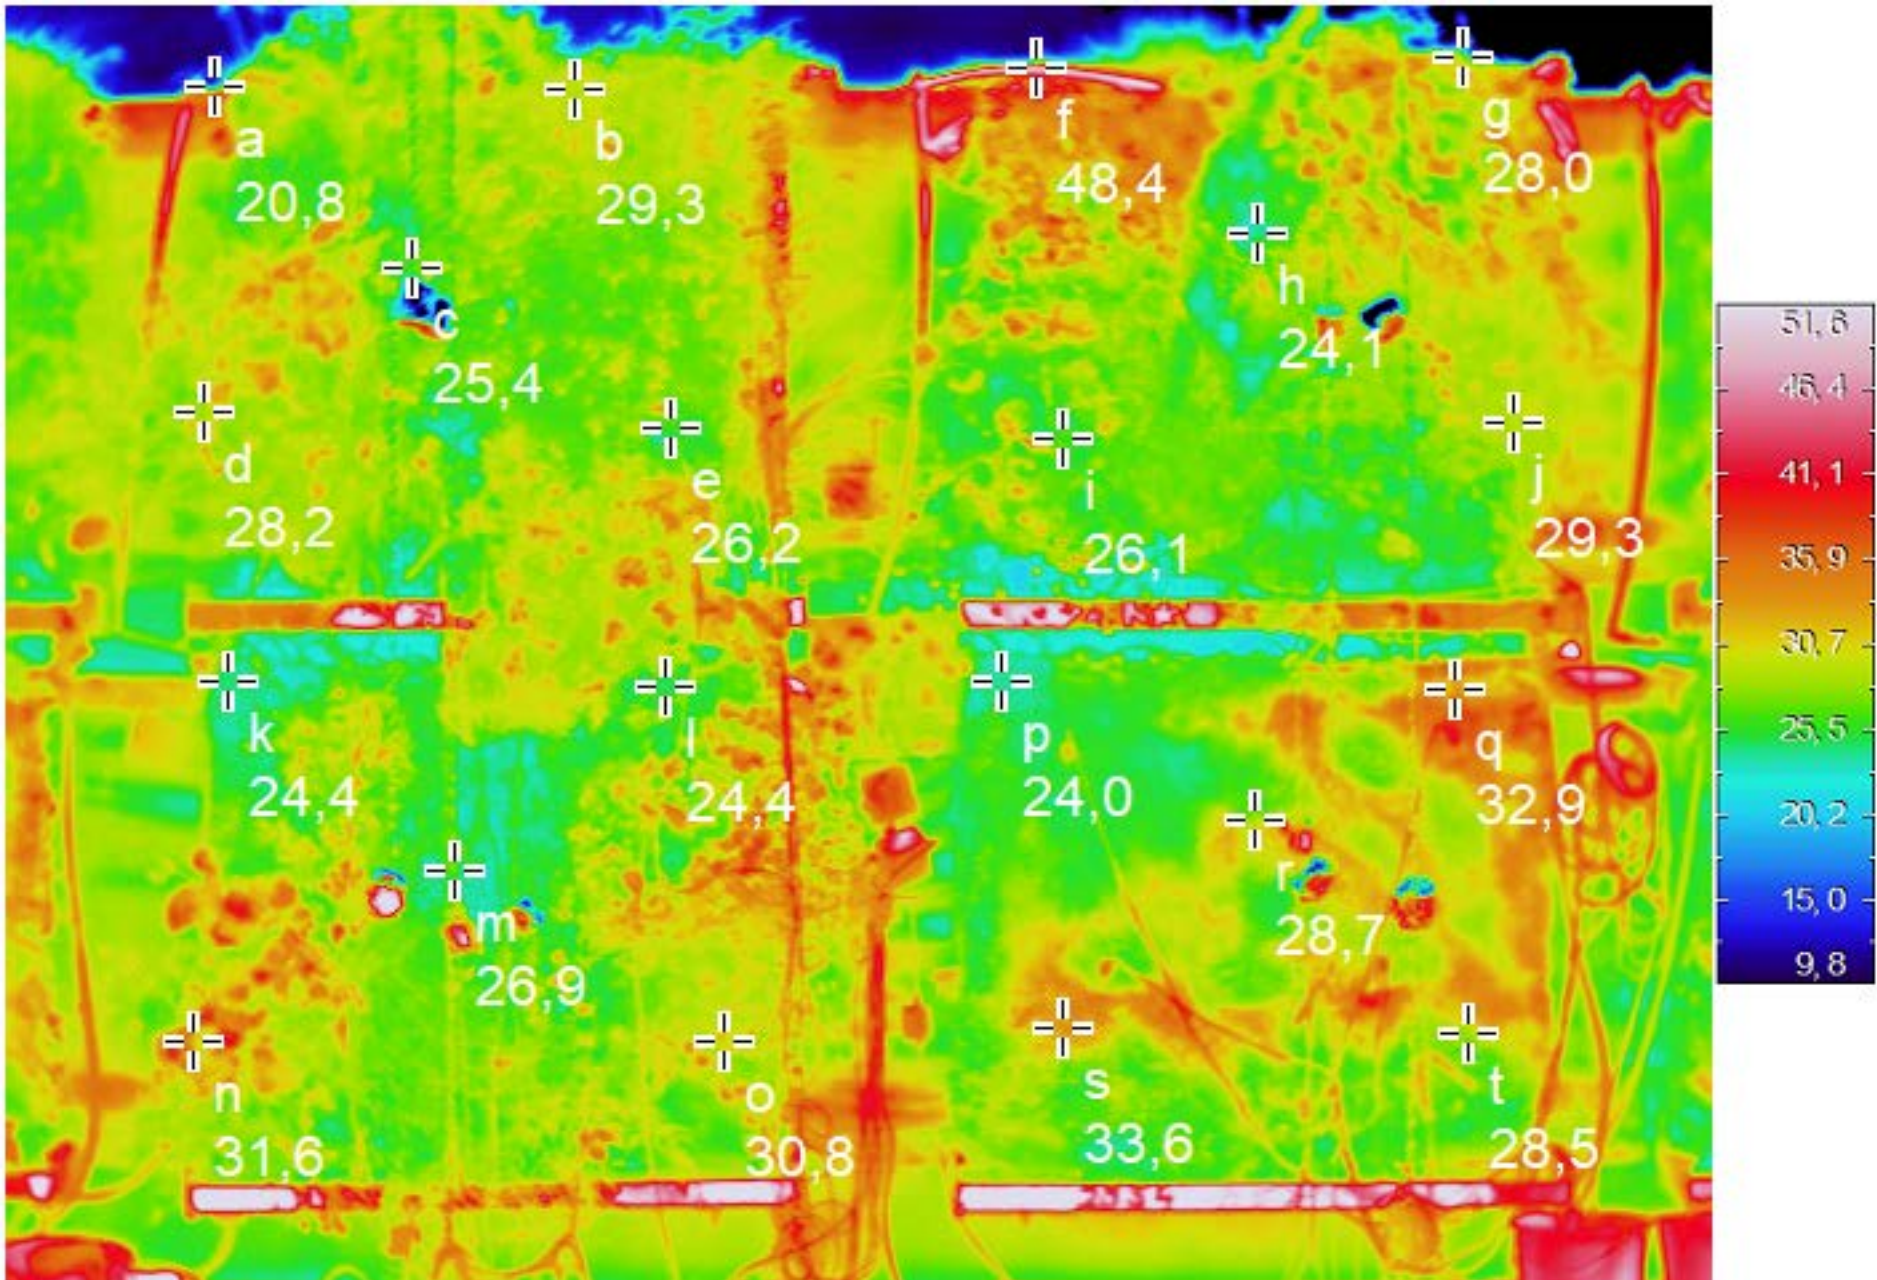

DateinameT02133IR.JPG  
Messtag:2019/06/19  
Messzeit:12:00:16  
Kommentar:  
Kameramodell:R500P  
Range:1[-20,0C-60,0C]  
BildmodusMEDx1,00  
Externes Objektiv:Standard  
Emissionsgrad:1.00  
Ambient Temp: 24,9IC  
IR Bildx1,00



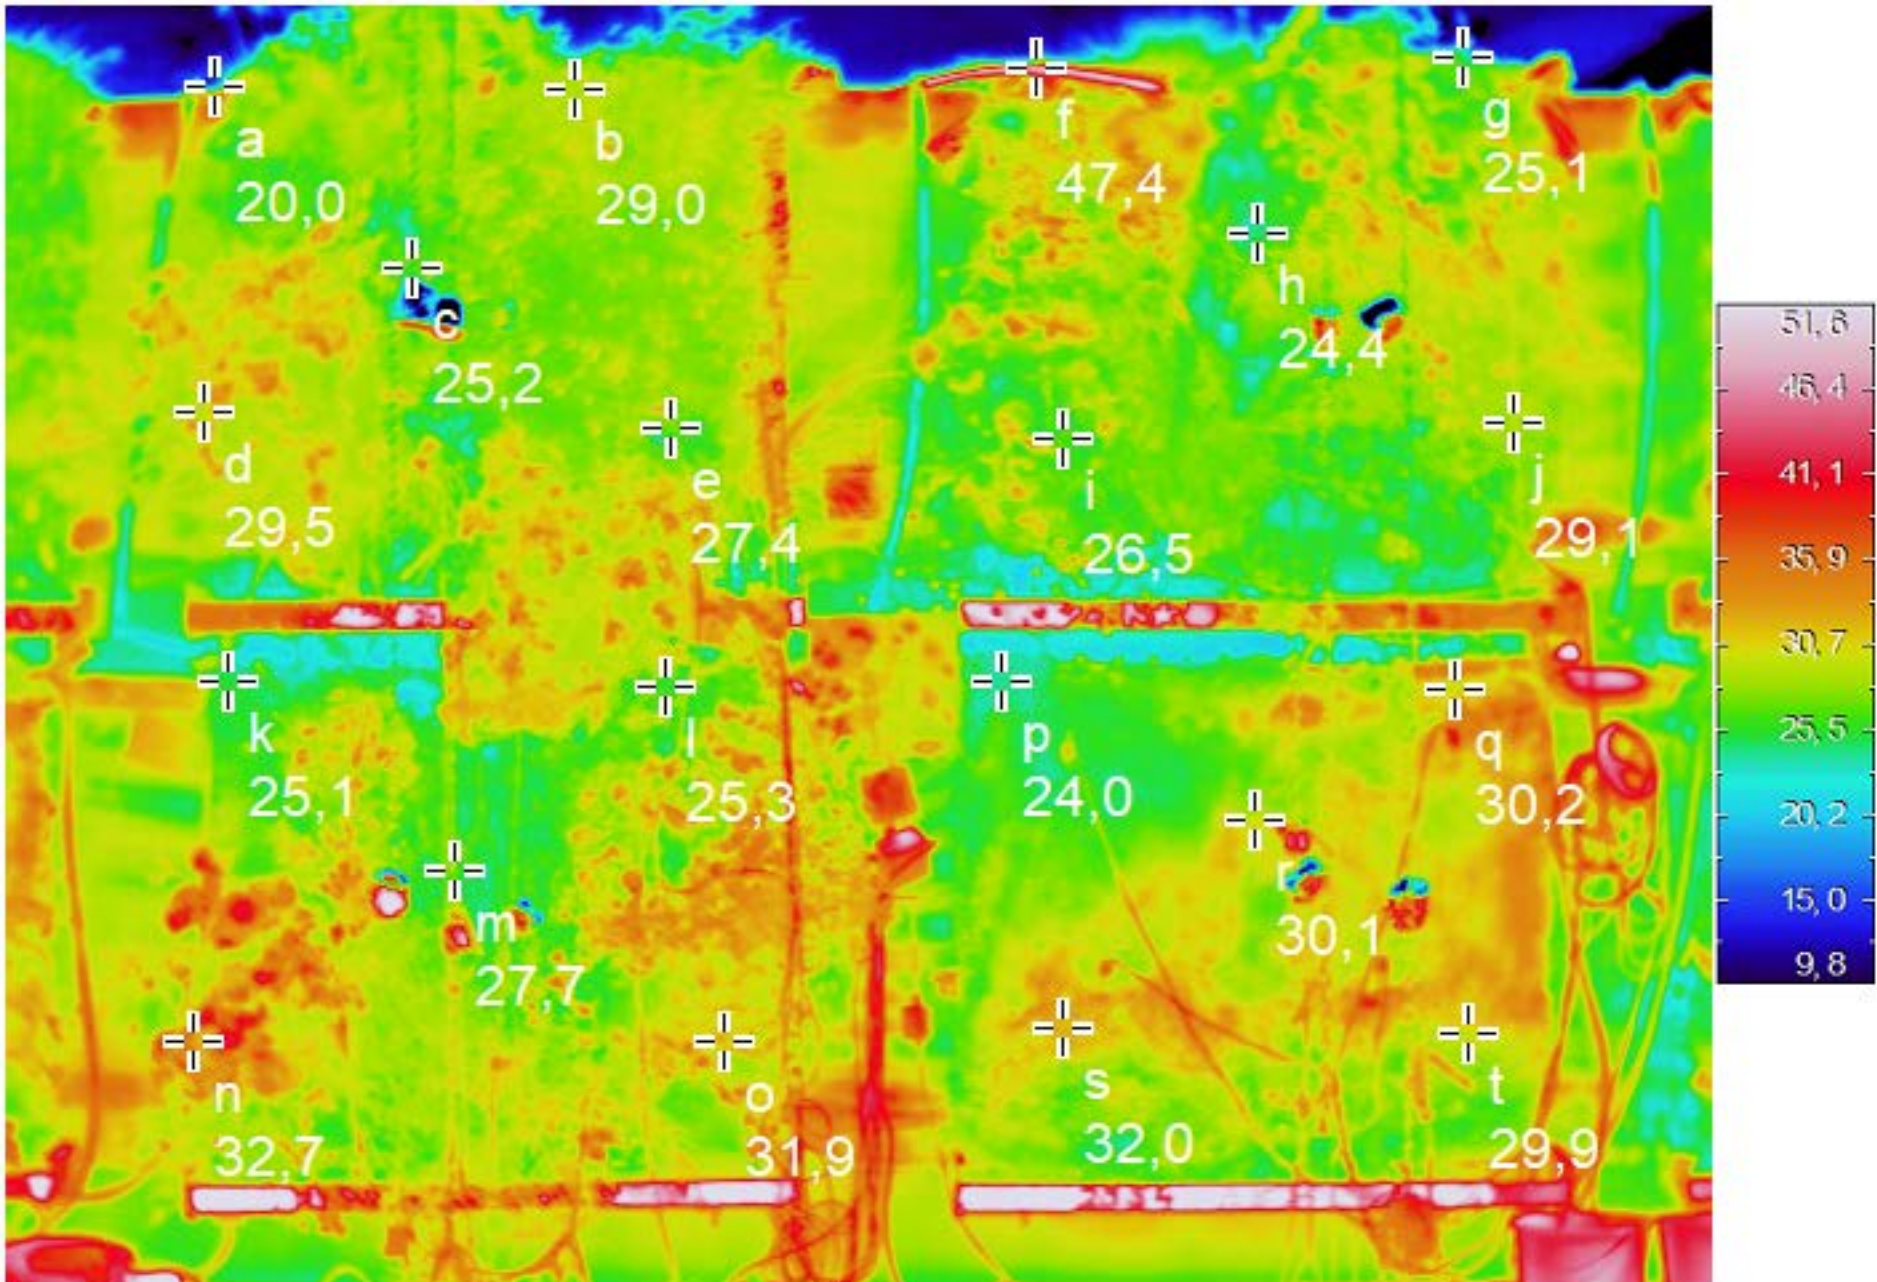

DateinameT02134IR.JPG  
Messtag:2019/06/19  
Messzeit:12:04:16  
Kommentar:  
Kameramodell:R500P  
Range:1[-20,0C-60,0C]  
BildmodusMEDx1,00  
Externes Objektiv:Standard  
Emissionsgrad:1.00  
Ambient Temp: 24,9IC  
IR Bildx1,00



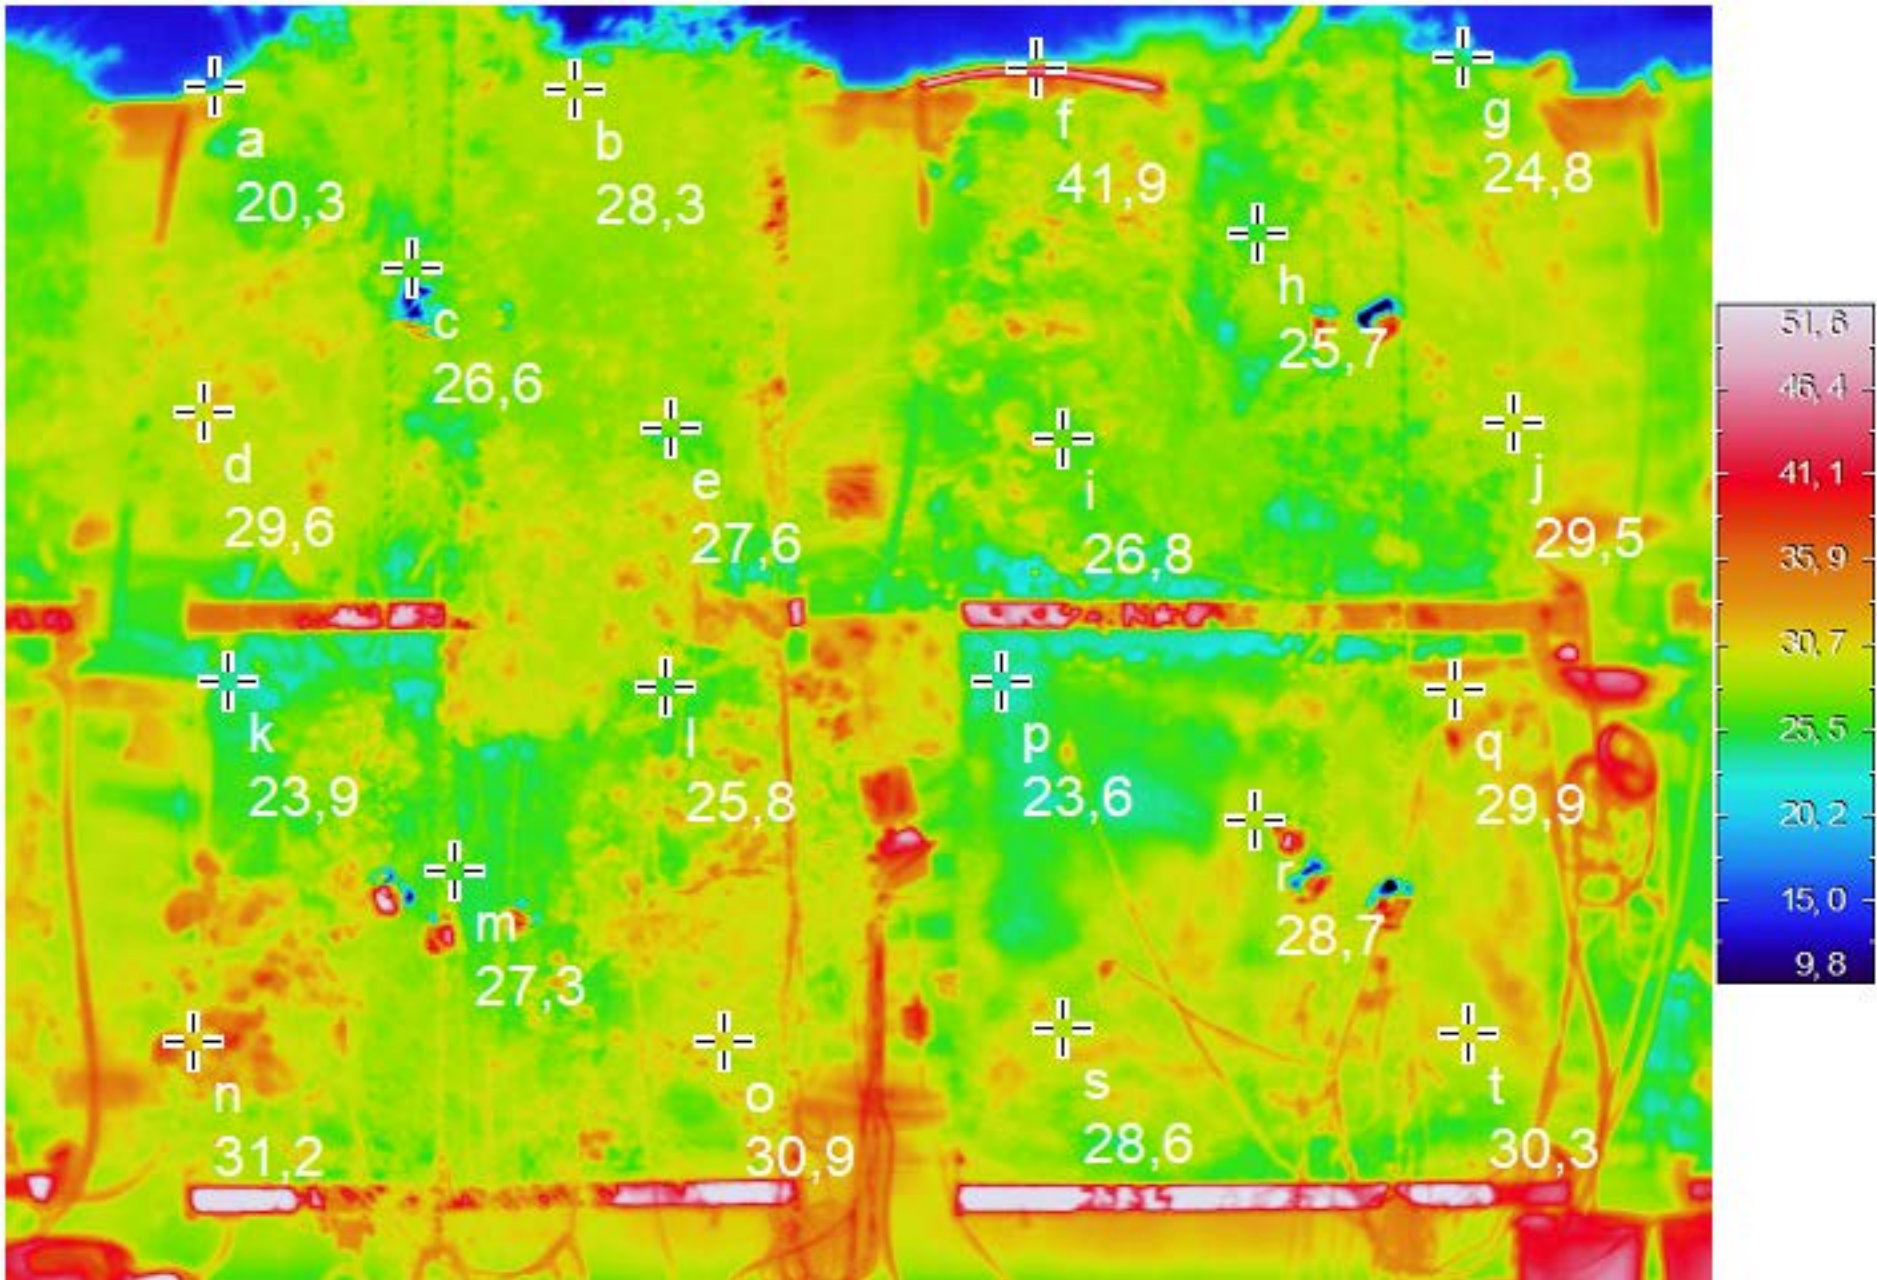

DateinameT02135IR.JPG  
Messtag:2019/06/19  
Messzeit:12:08:16  
Kommentar:  
Kameramodell:R500P  
Range:1[-20,0C-60,0C]  
BildmodusMEDx1,00  
Externes Objektiv:Standard  
Emissionsgrad:1.00  
Ambient Temp: 24,9IC  
IR Bildx1,00



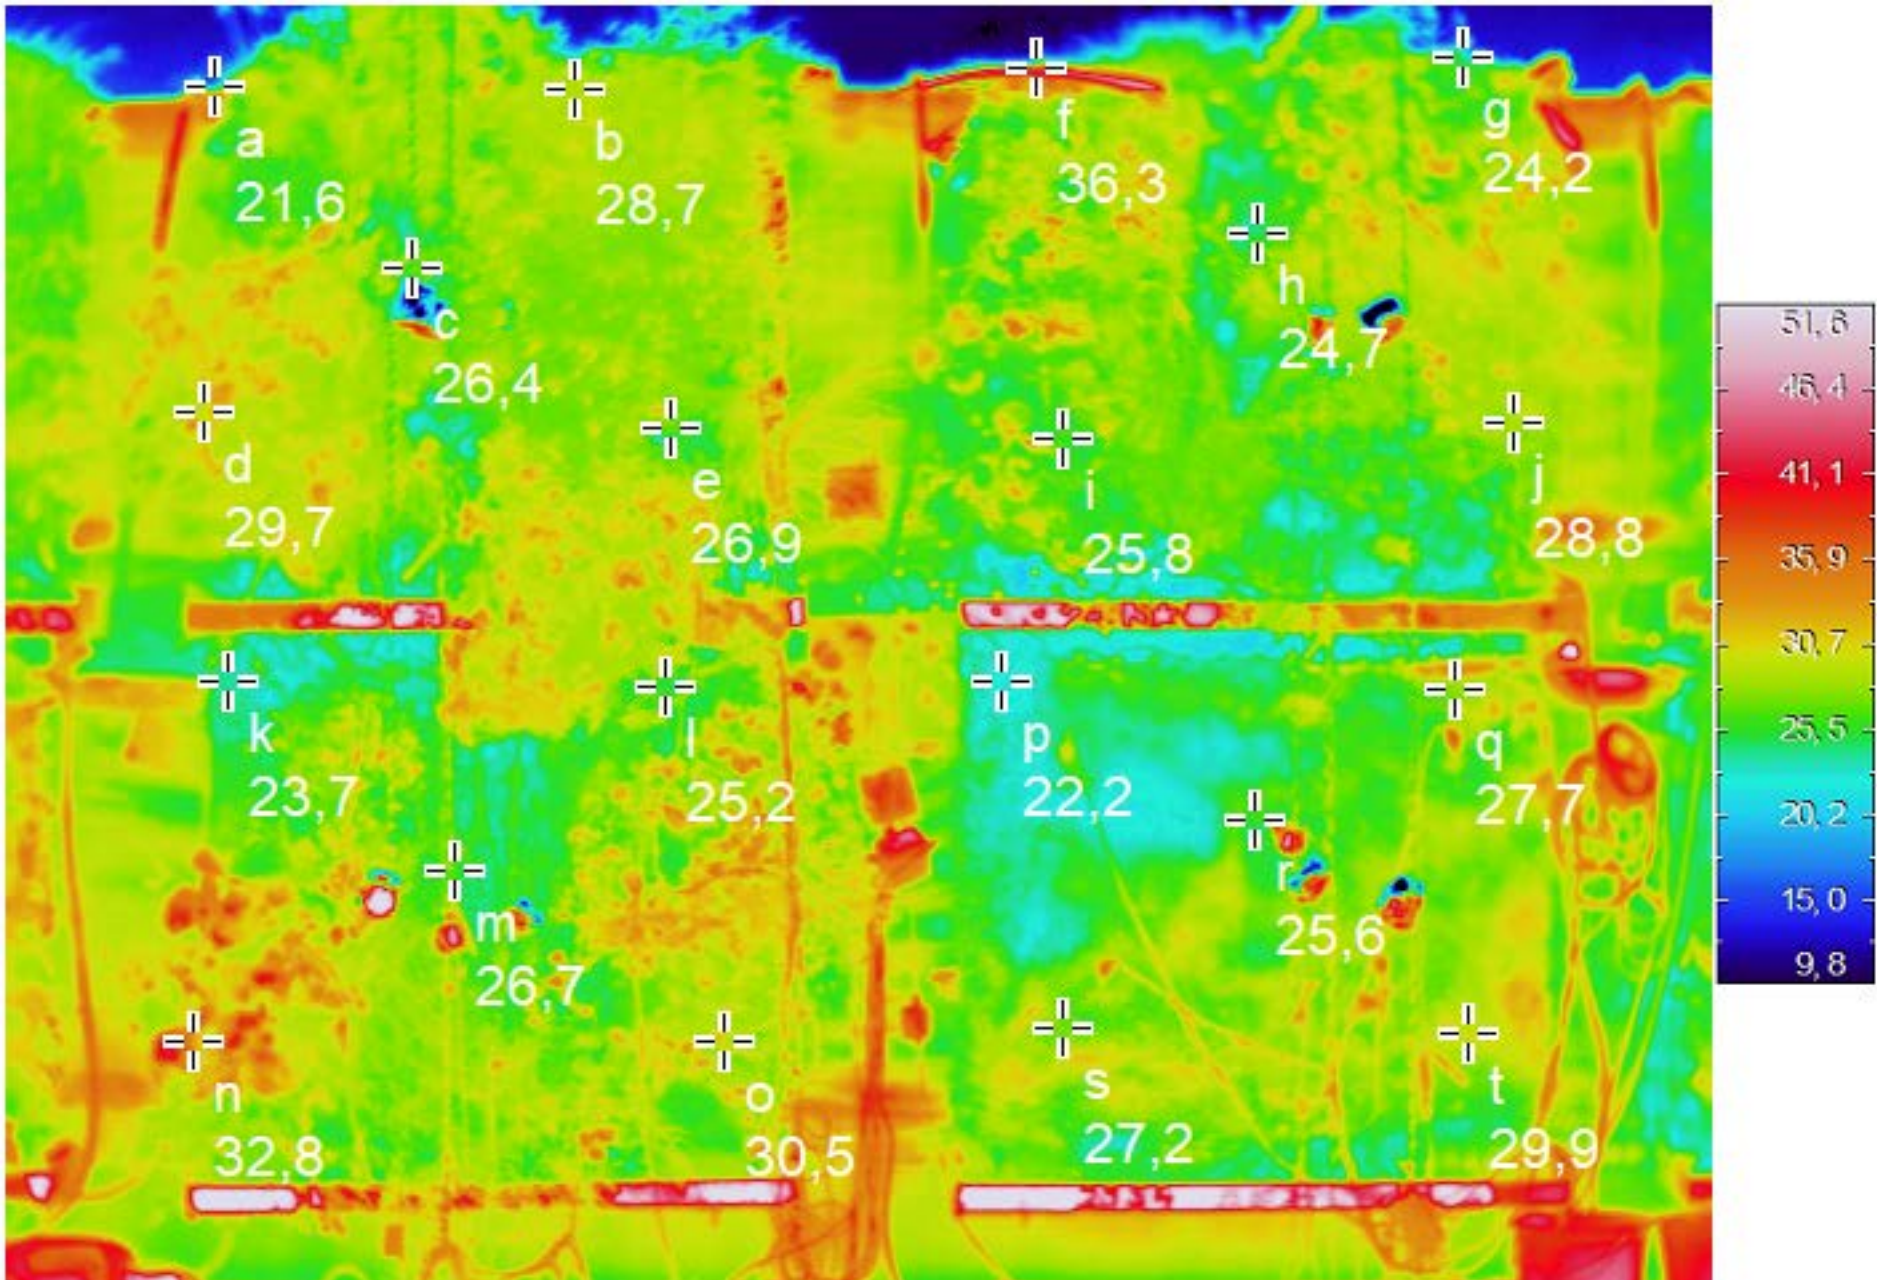

DateinameT02136IR.JPG  
Messtag:2019/06/19  
Messzeit:12:12:16  
Kommentar:  
Kameramodell:R500P  
Range:1[-20,0C-60,0C]  
BildmodusMEDx1,00  
Externes Objektiv:Standard  
Emissionsgrad:1.00  
Ambient Temp: 24,9IC  
IR Bildx1,00



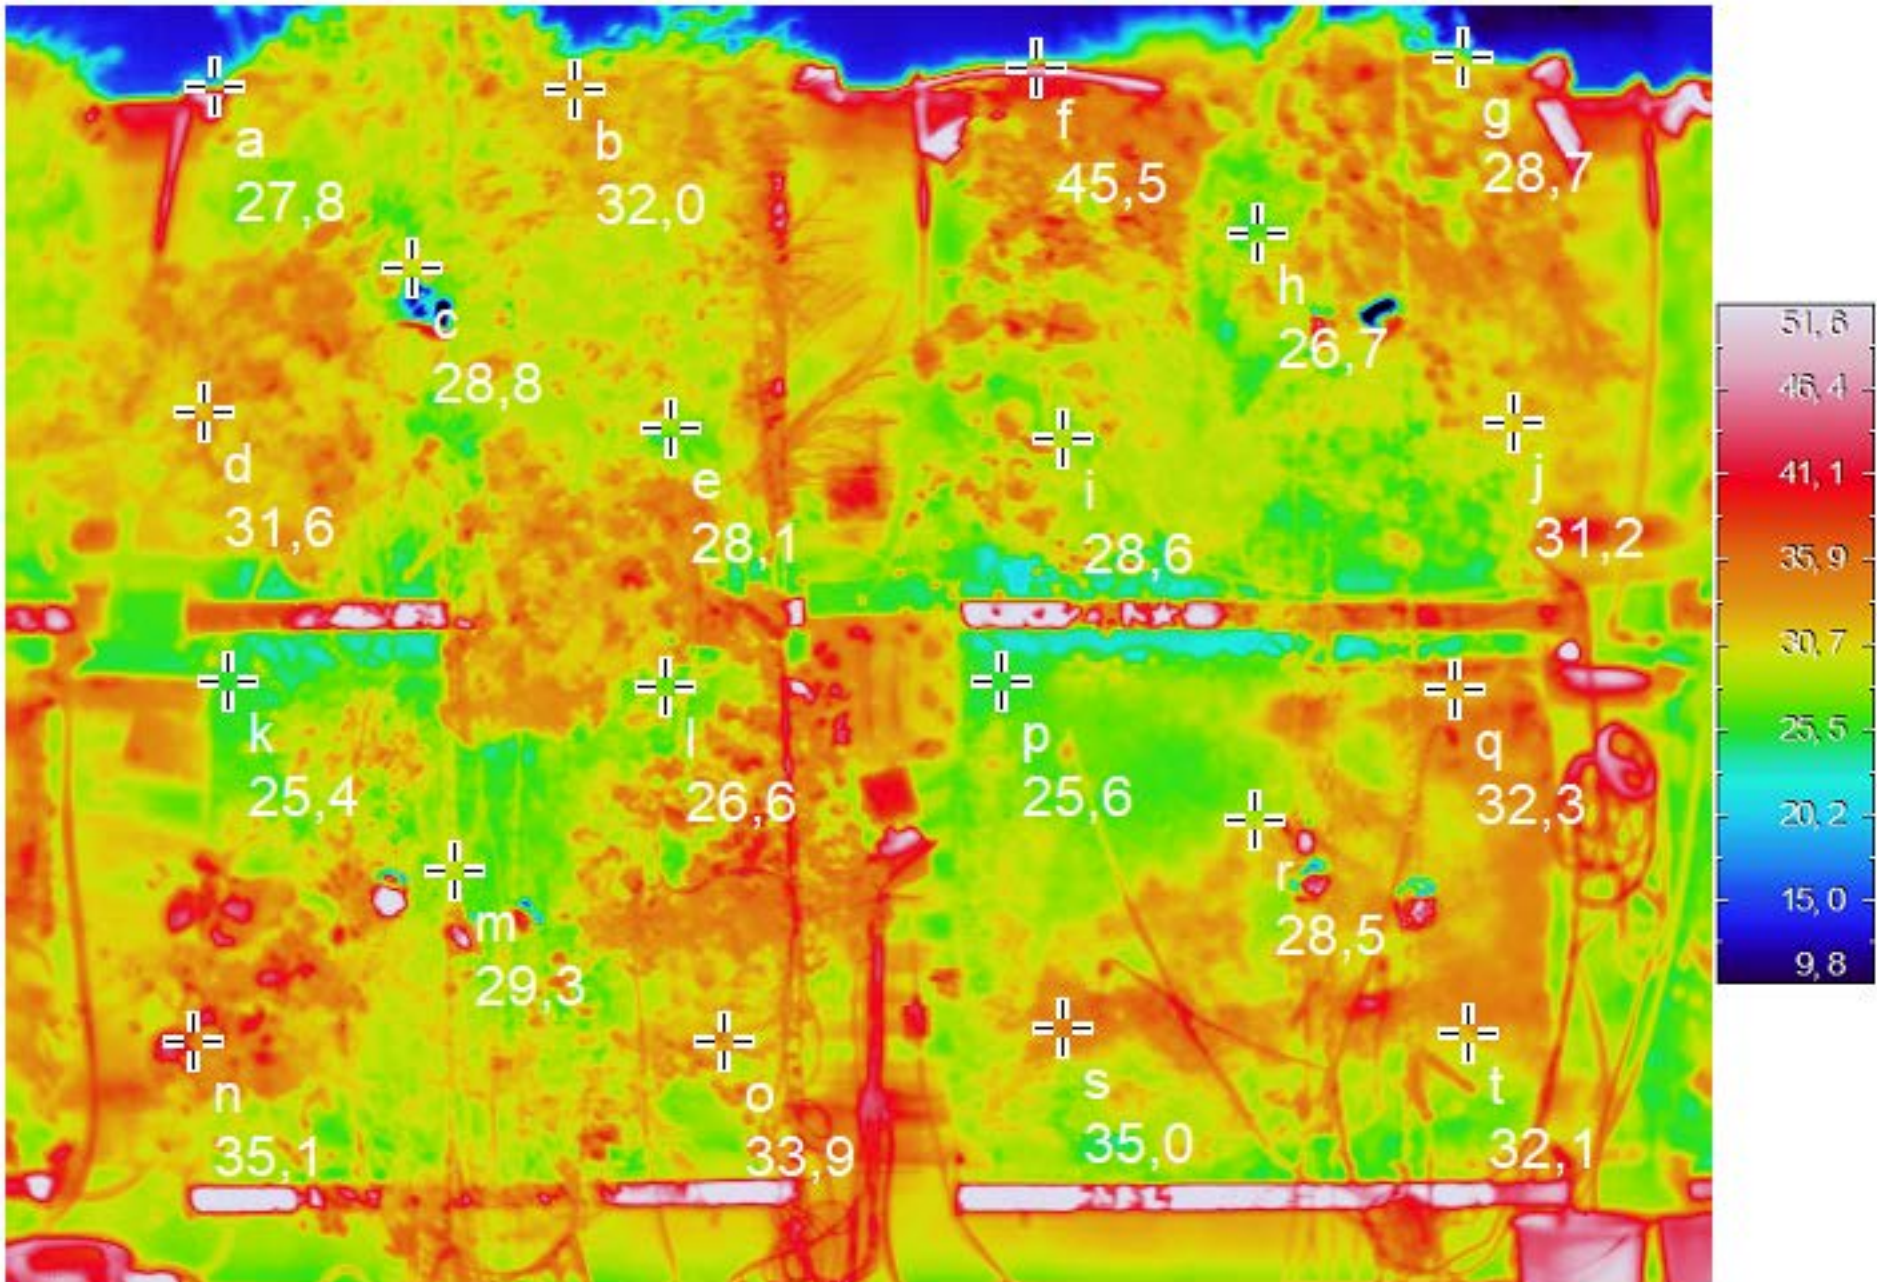

DateinameT02137IR.JPG  
Messtag:2019/06/19  
Messzeit:12:16:16  
Kommentar:  
Kameramodell:R500P  
Range:1[-20,0C-60,0C]  
BildmodusMEDx1,00  
Externes Objektiv:Standard  
Emissionsgrad:1.00  
Ambient Temp: 24,9IC  
IR Bildx1,00



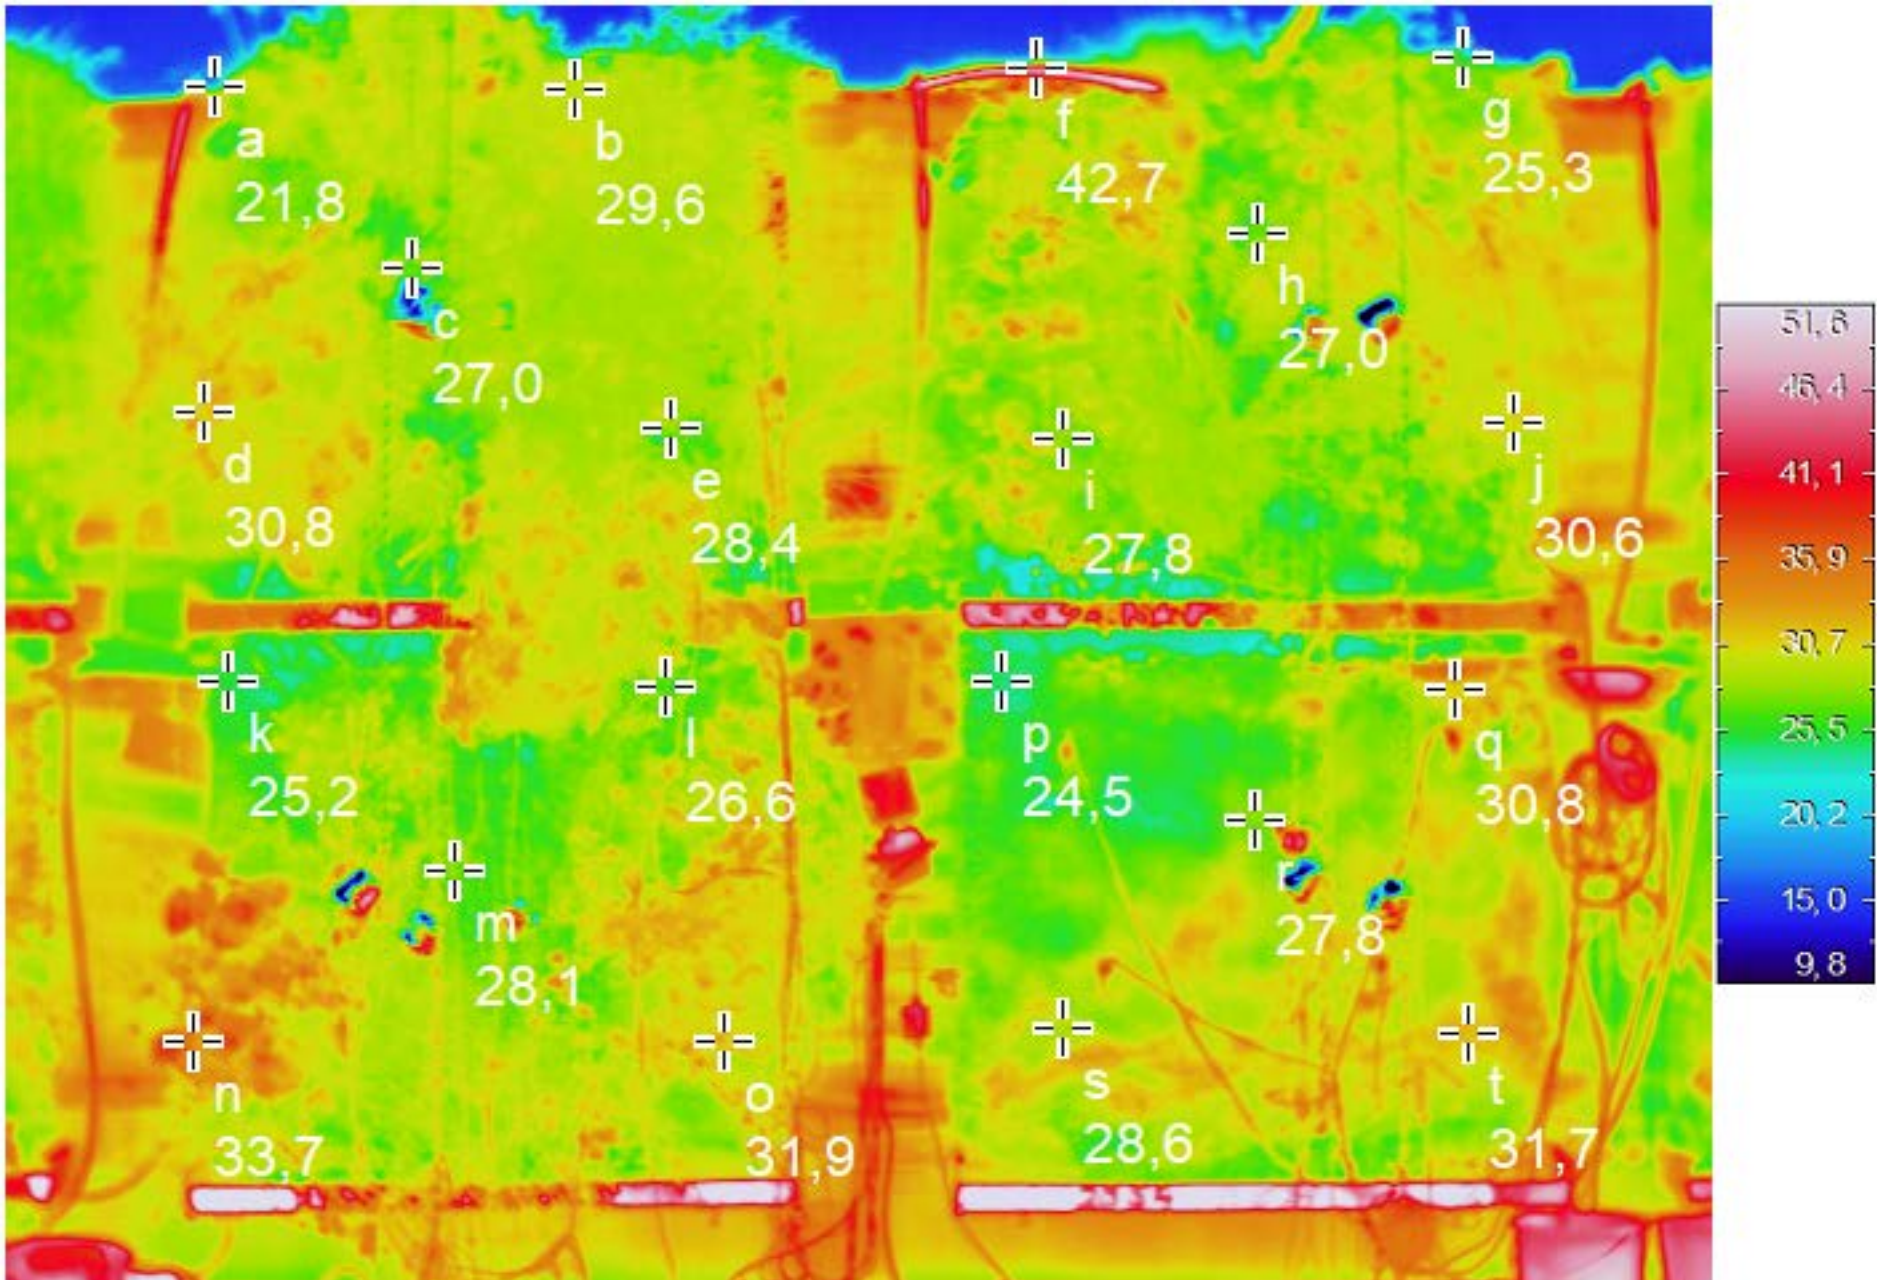

DateinameT02138IR.JPG  
Messtag:2019/06/19  
Messzeit:12:20:16  
Kommentar:  
Kameramodell:R500P  
Range:1[-20,0C-60,0C]  
BildmodusMEDx1,00  
Externes Objektiv:Standard  
Emissionsgrad:1.00  
Ambient Temp: 24,9IC  
IR Bildx1,00



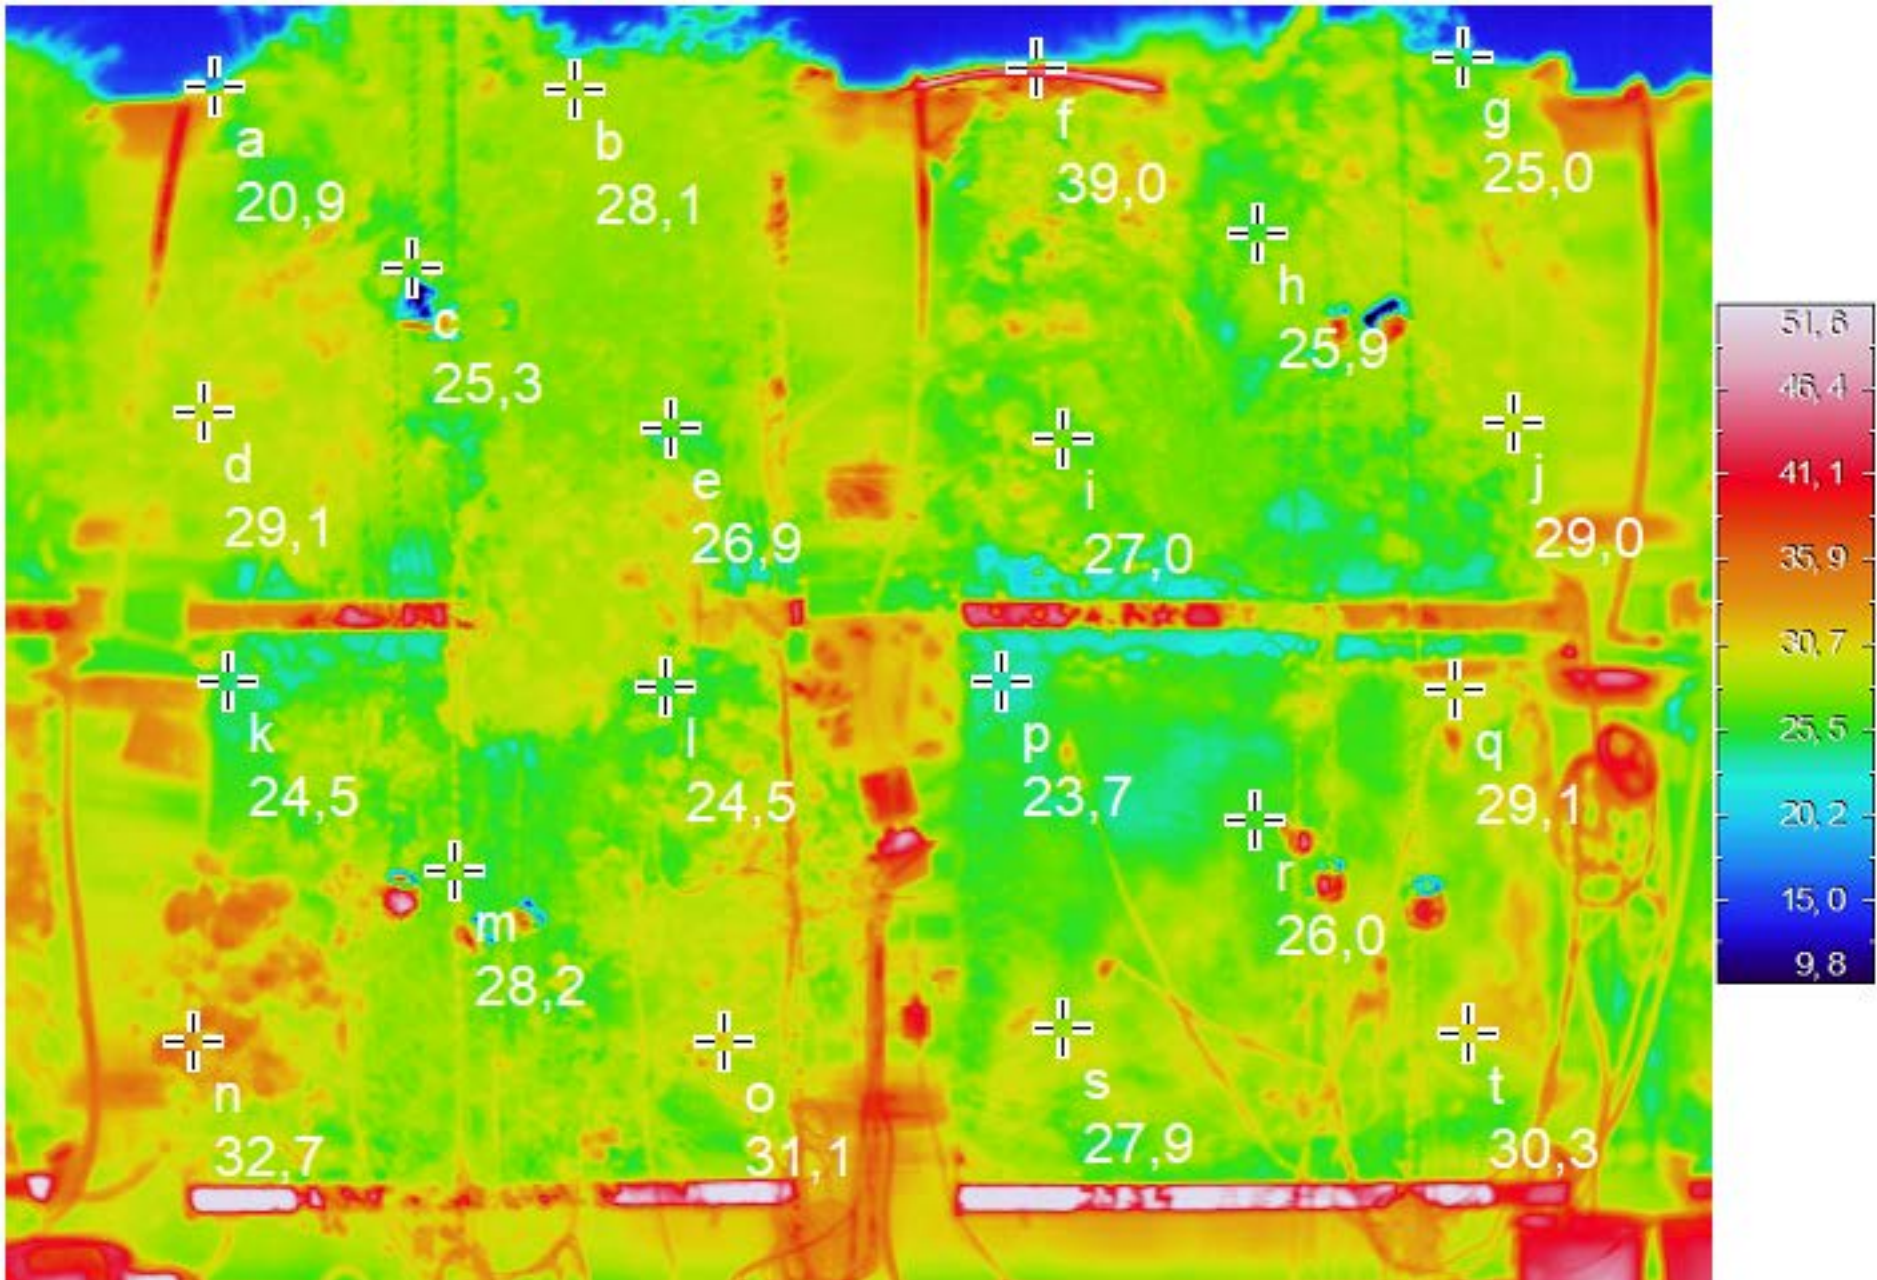

DateinameT02139IR.JPG  
Messtag:2019/06/19  
Messzeit:12:24:16  
Kommentar:  
Kameramodell:R500P  
Range:1[-20,0C-60,0C]  
BildmodusMEDx1,00  
Externes Objektiv:Standard  
Emissionsgrad:1.00  
Ambient Temp: 24,9IC  
IR Bildx1,00



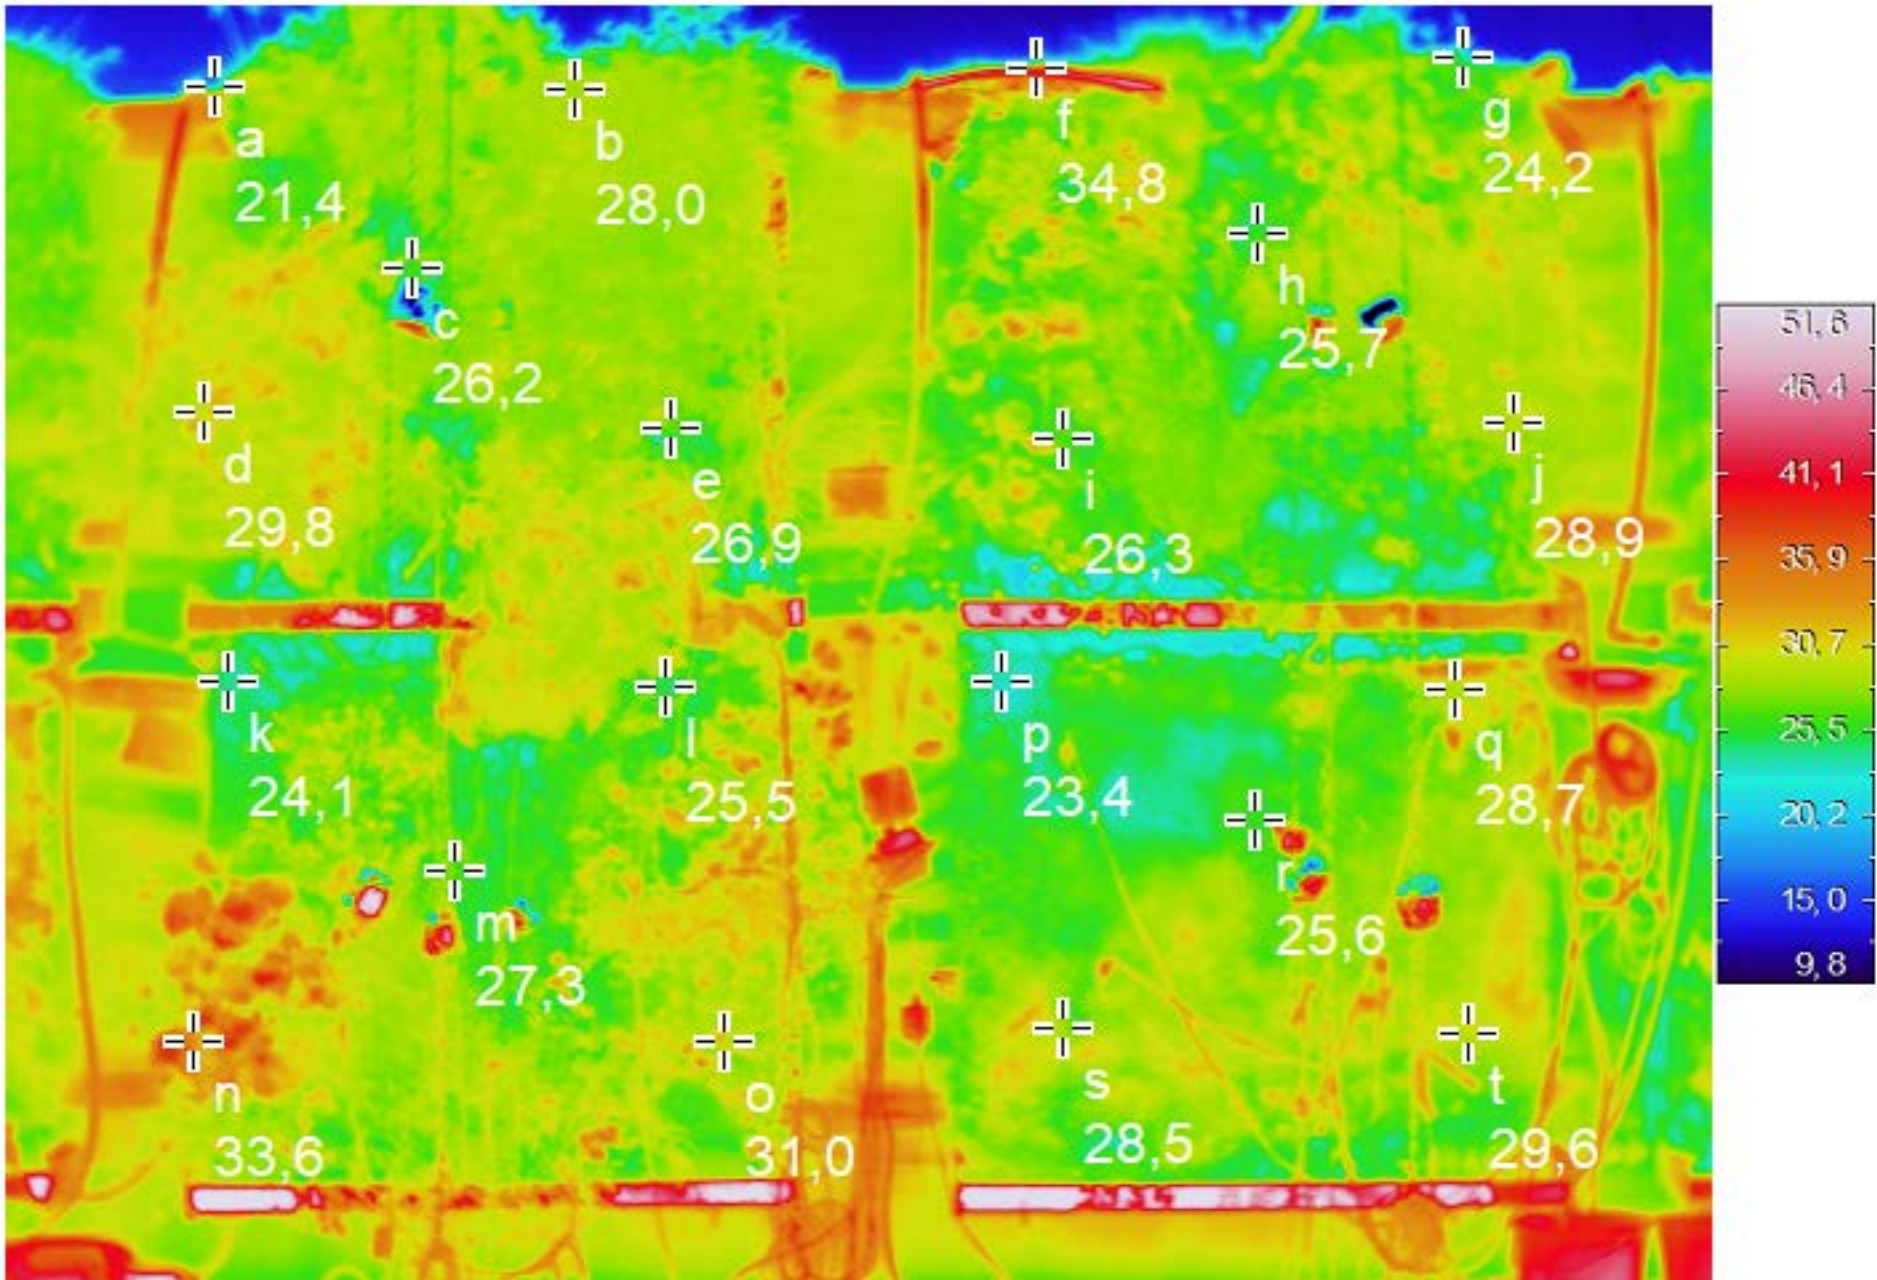

DateinameT02140IR.JPG  
Messtag:2019/06/19  
Messzeit:12:28:16  
Kommentar:  
Kameramodell:R500P  
Range:1[-20,0C-60,0C]  
BildmodusMEDx1,00  
Externes Objektiv:Standard  
Emissionsgrad:1.00  
Ambient Temp: 24,9IC  
IR Bildx1,00



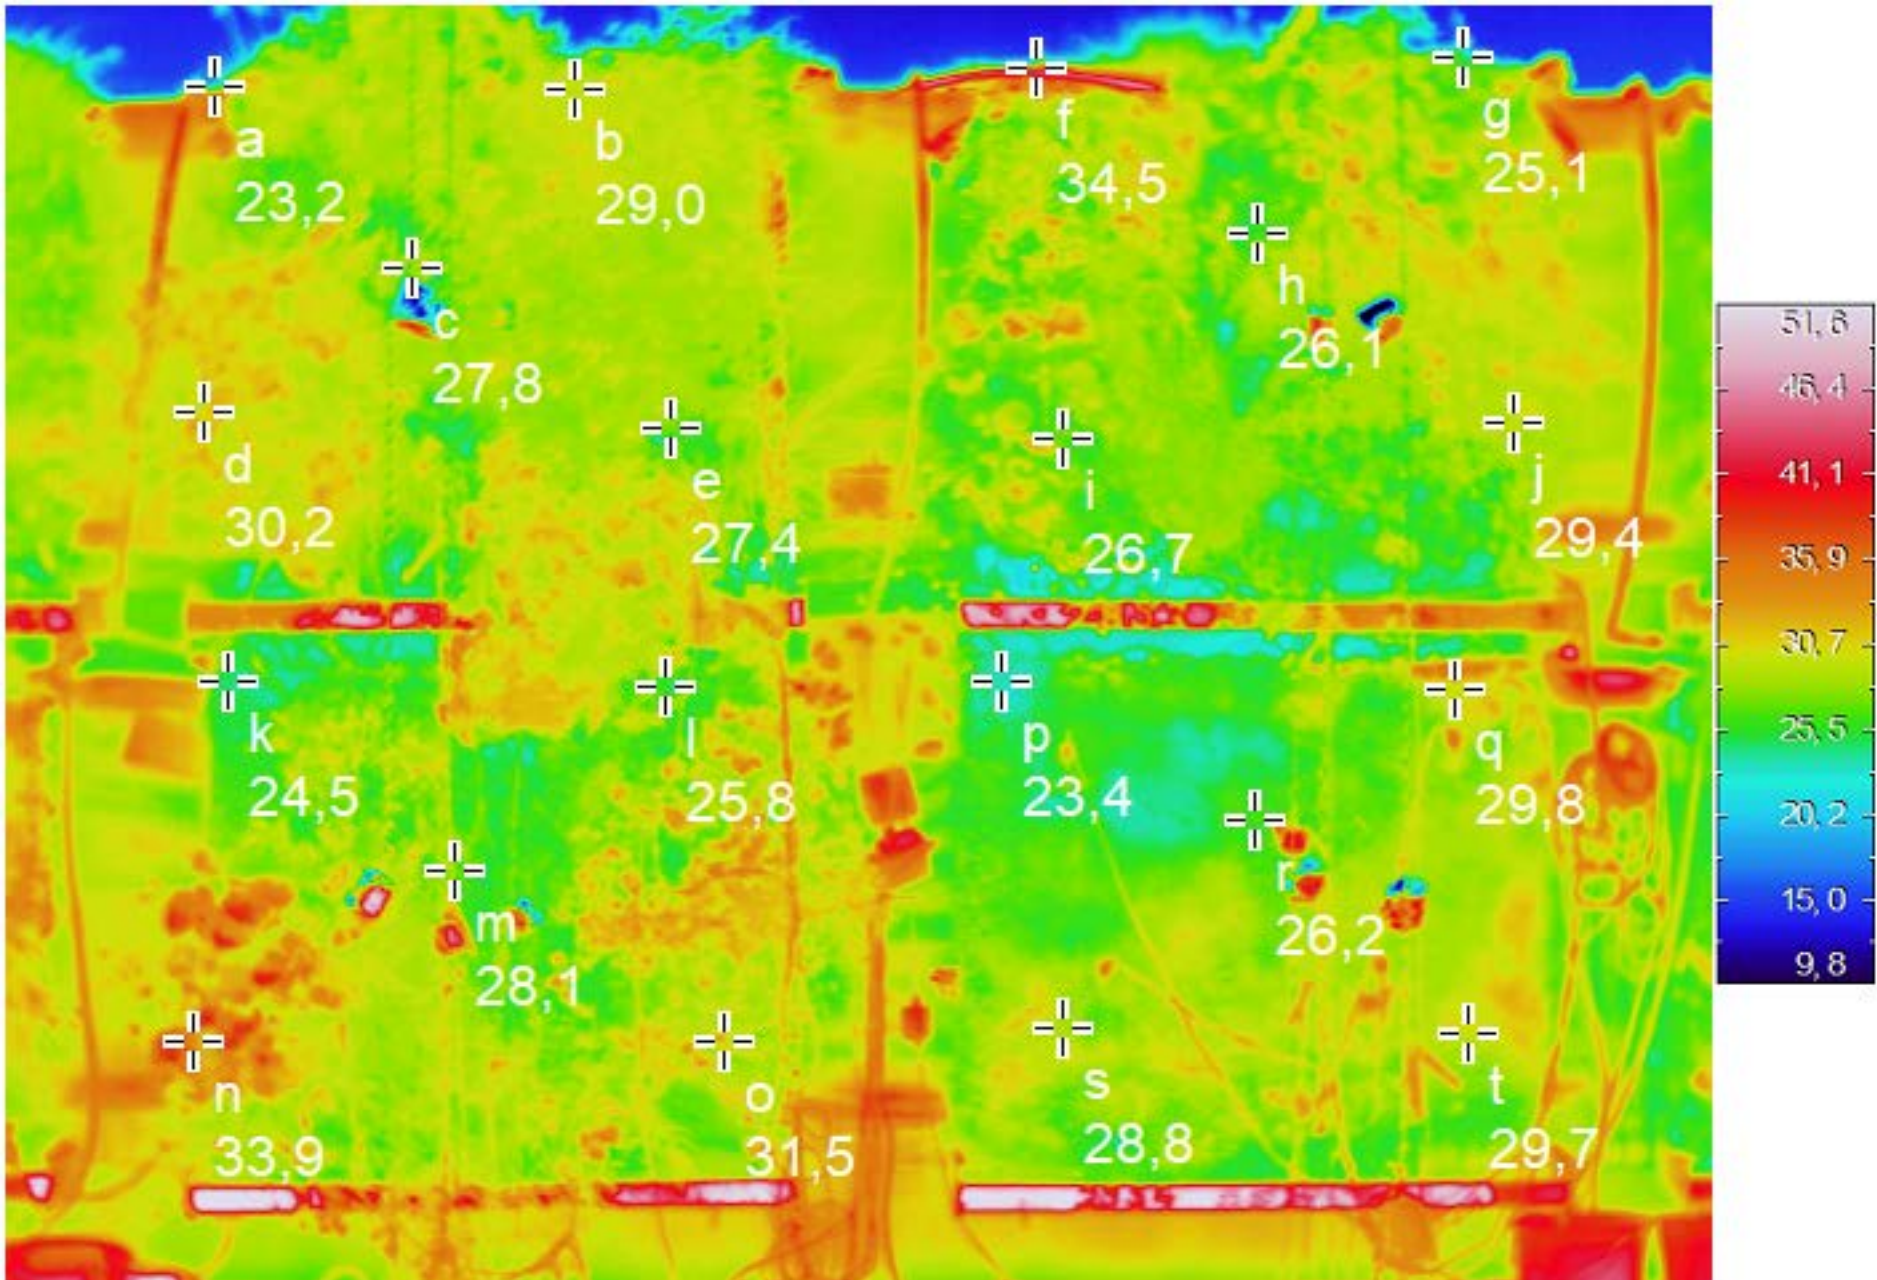

DateinameT02141IR.JPG  
Messtag:2019/06/19  
Messzeit:12:32:16  
Kommentar:  
Kameramodell:R500P  
Range:1[-20,0C-60,0C]  
BildmodusMEDx1,00  
Externes Objektiv:Standard  
Emissionsgrad:1.00  
Ambient Temp: 24,9IC  
IR Bildx1,00



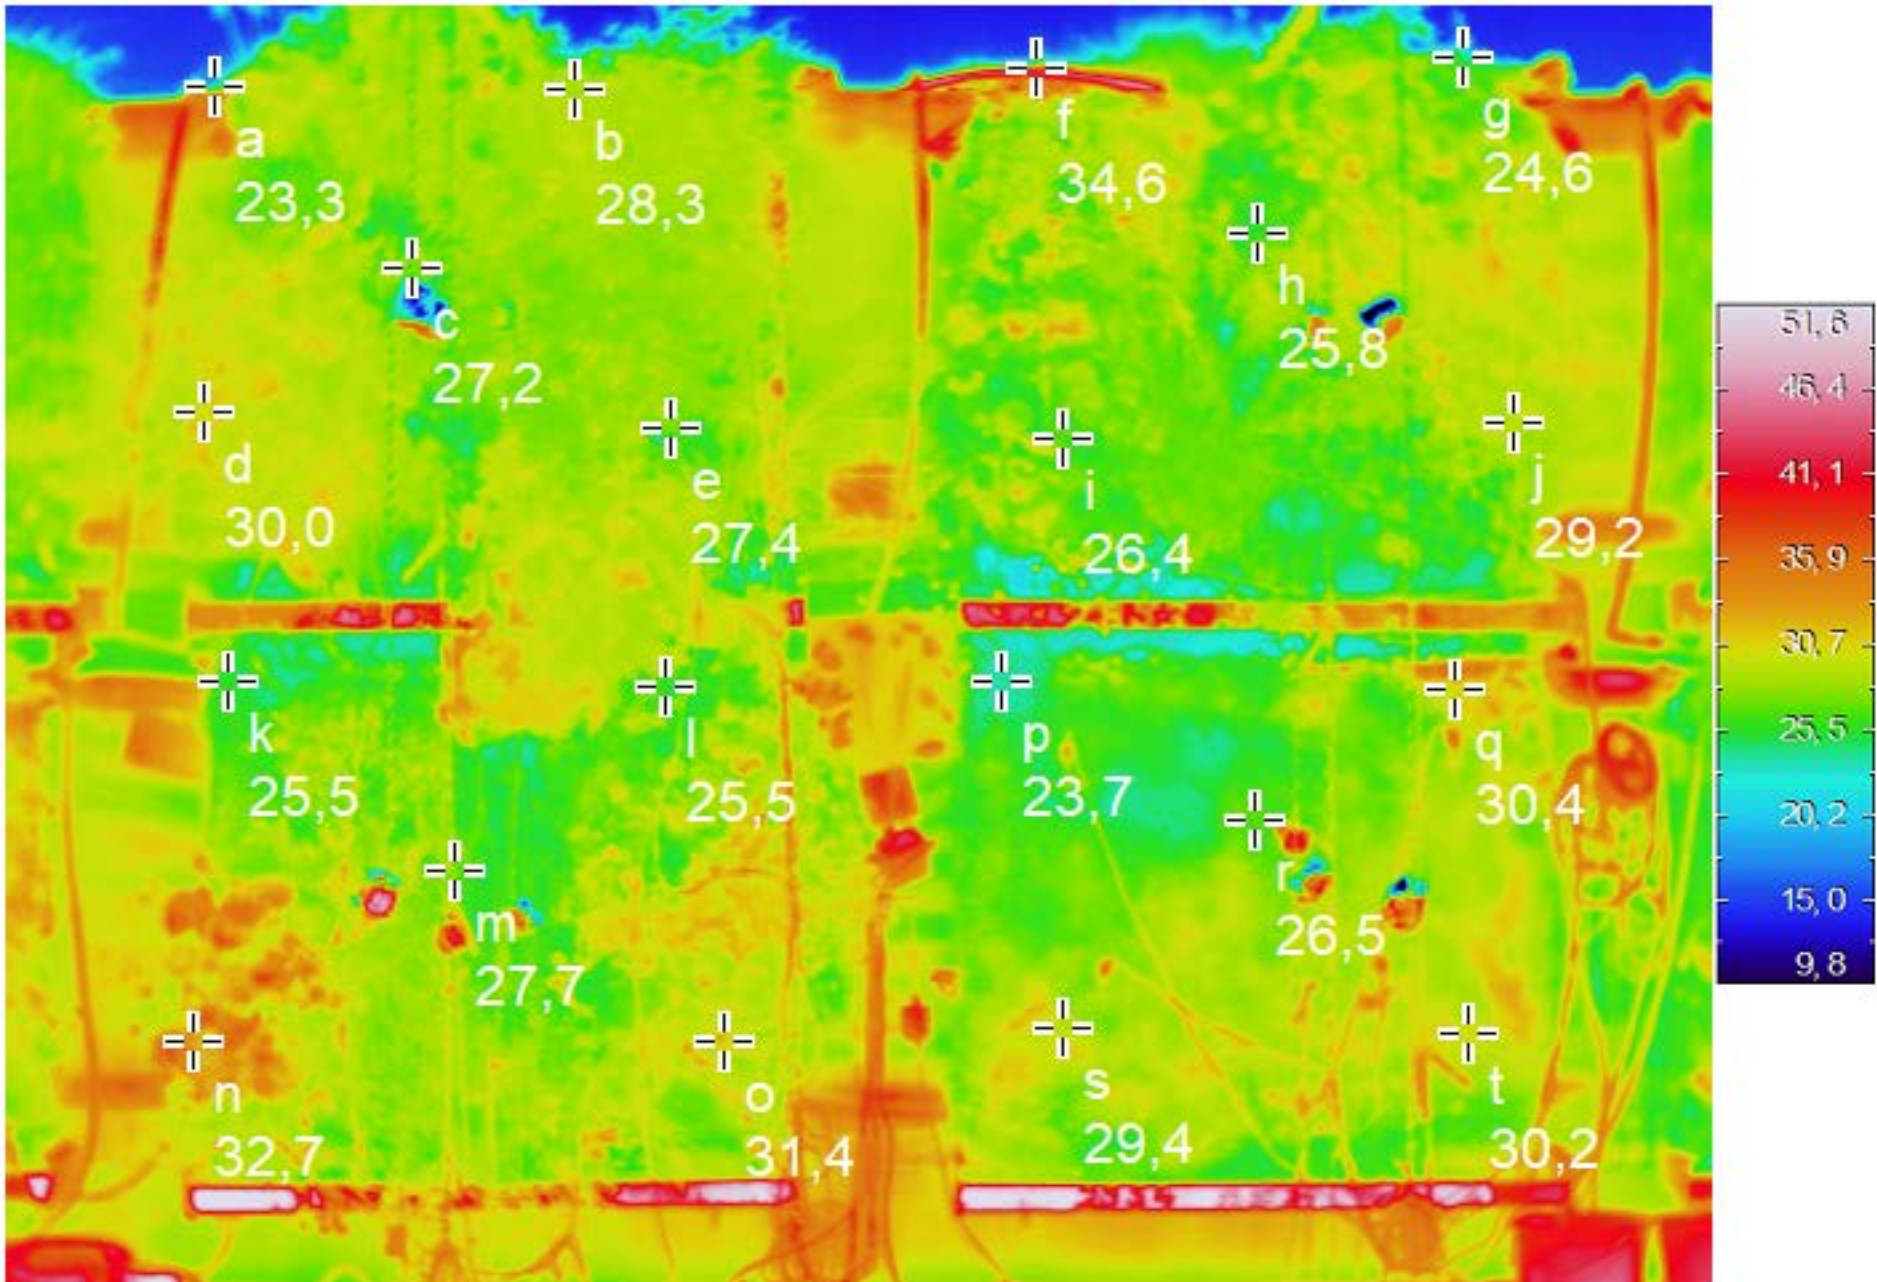

DateinameT02142IR.JPG  
Messtag:2019/06/19  
Messzeit:12:36:16  
Kommentar:  
Kameramodell:R500P  
Range:1[-20,0C-60,0C]  
BildmodusMEDx1,00  
Externes Objektiv:Standard  
Emissionsgrad:1.00  
Ambient Temp: 24,9IC  
IR Bildx1,00



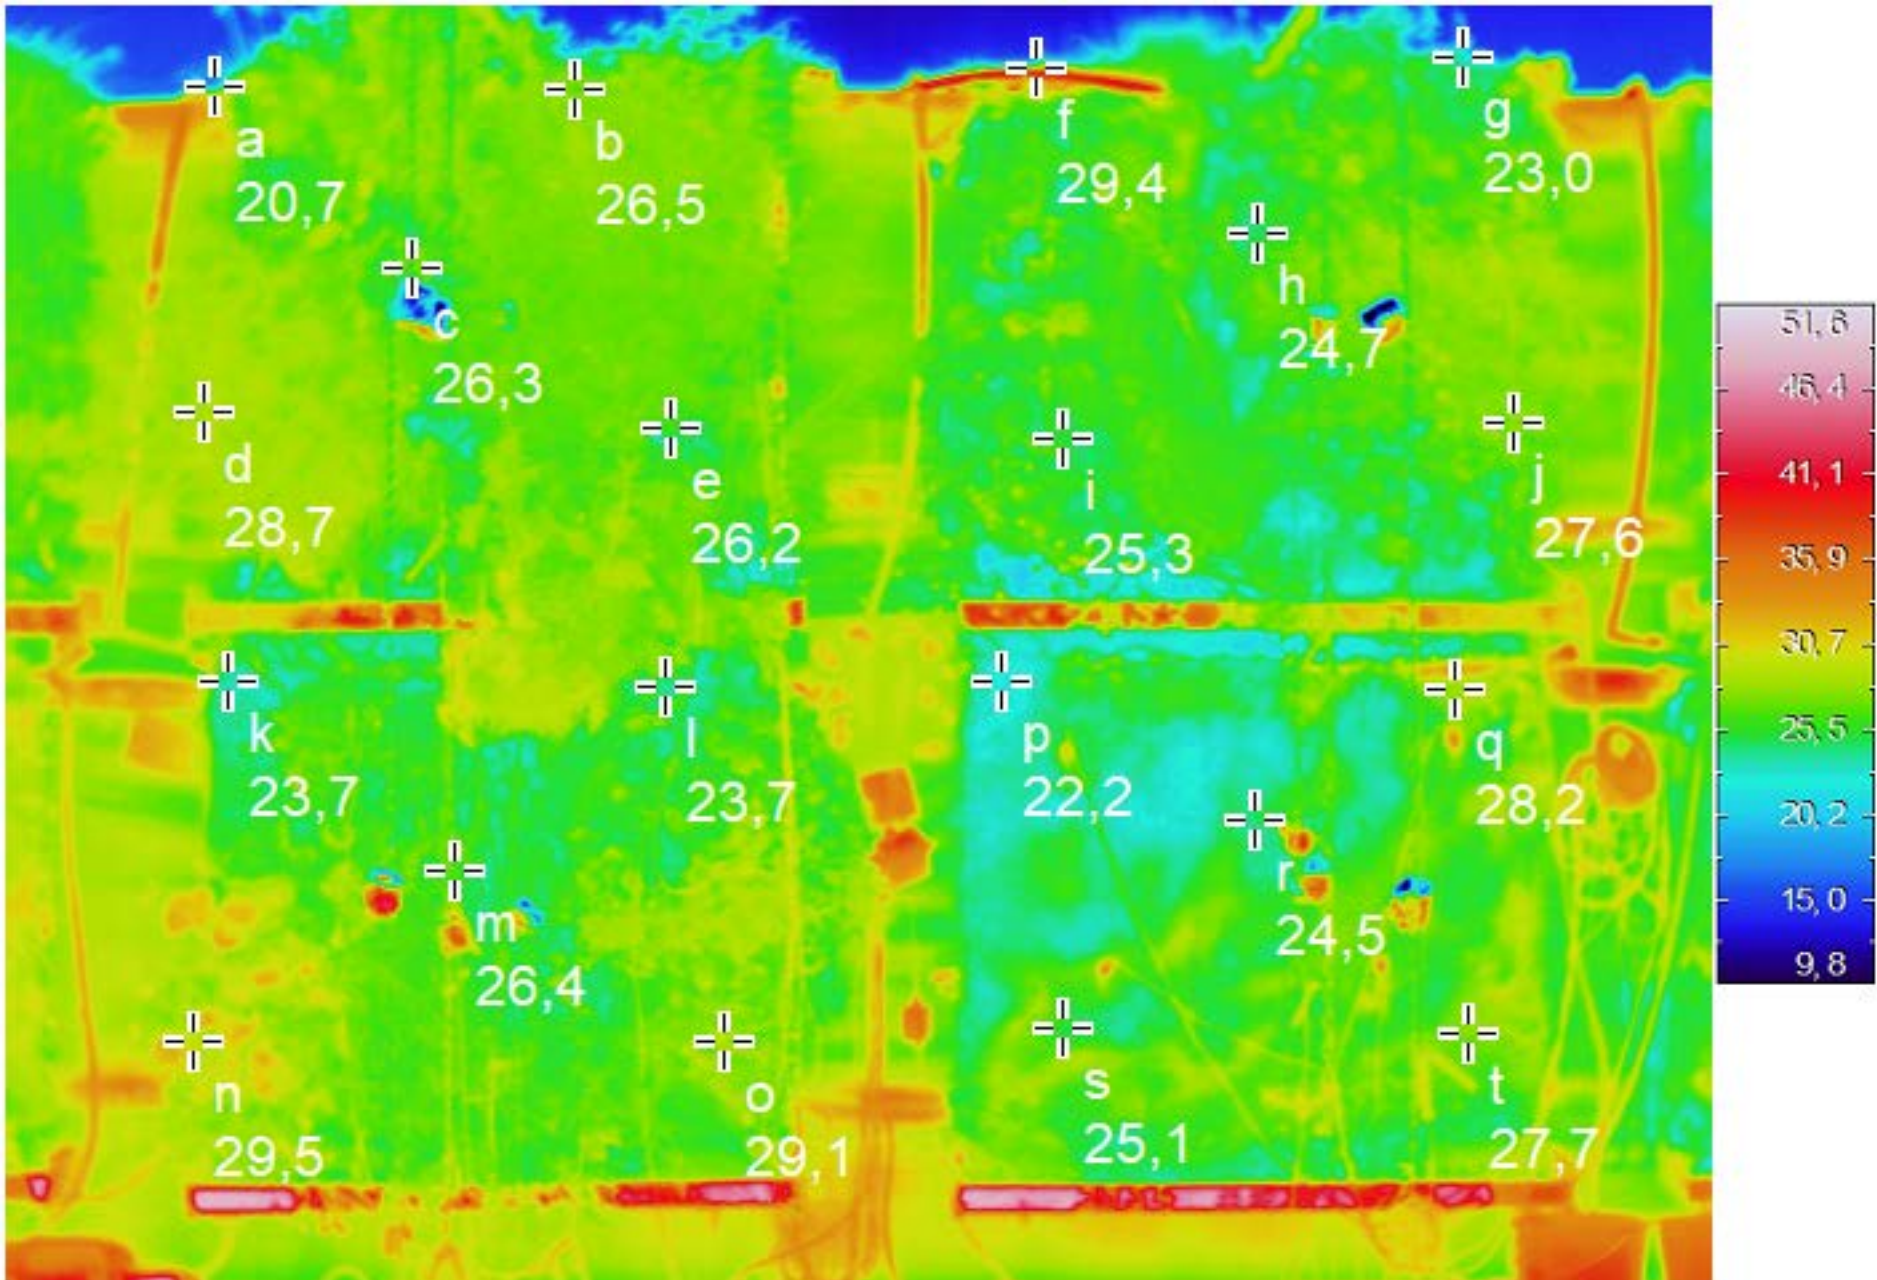

DateinameT02143IR.JPG  
Messtag:2019/06/19  
Messzeit:12:40:16  
Kommentar:  
Kameramodell:R500P  
Range:1[-20,0C-60,0C]  
BildmodusMEDx1,00  
Externes Objektiv:Standard  
Emissionsgrad:1.00  
Ambient Temp: 24,9IC  
IR Bildx1,00



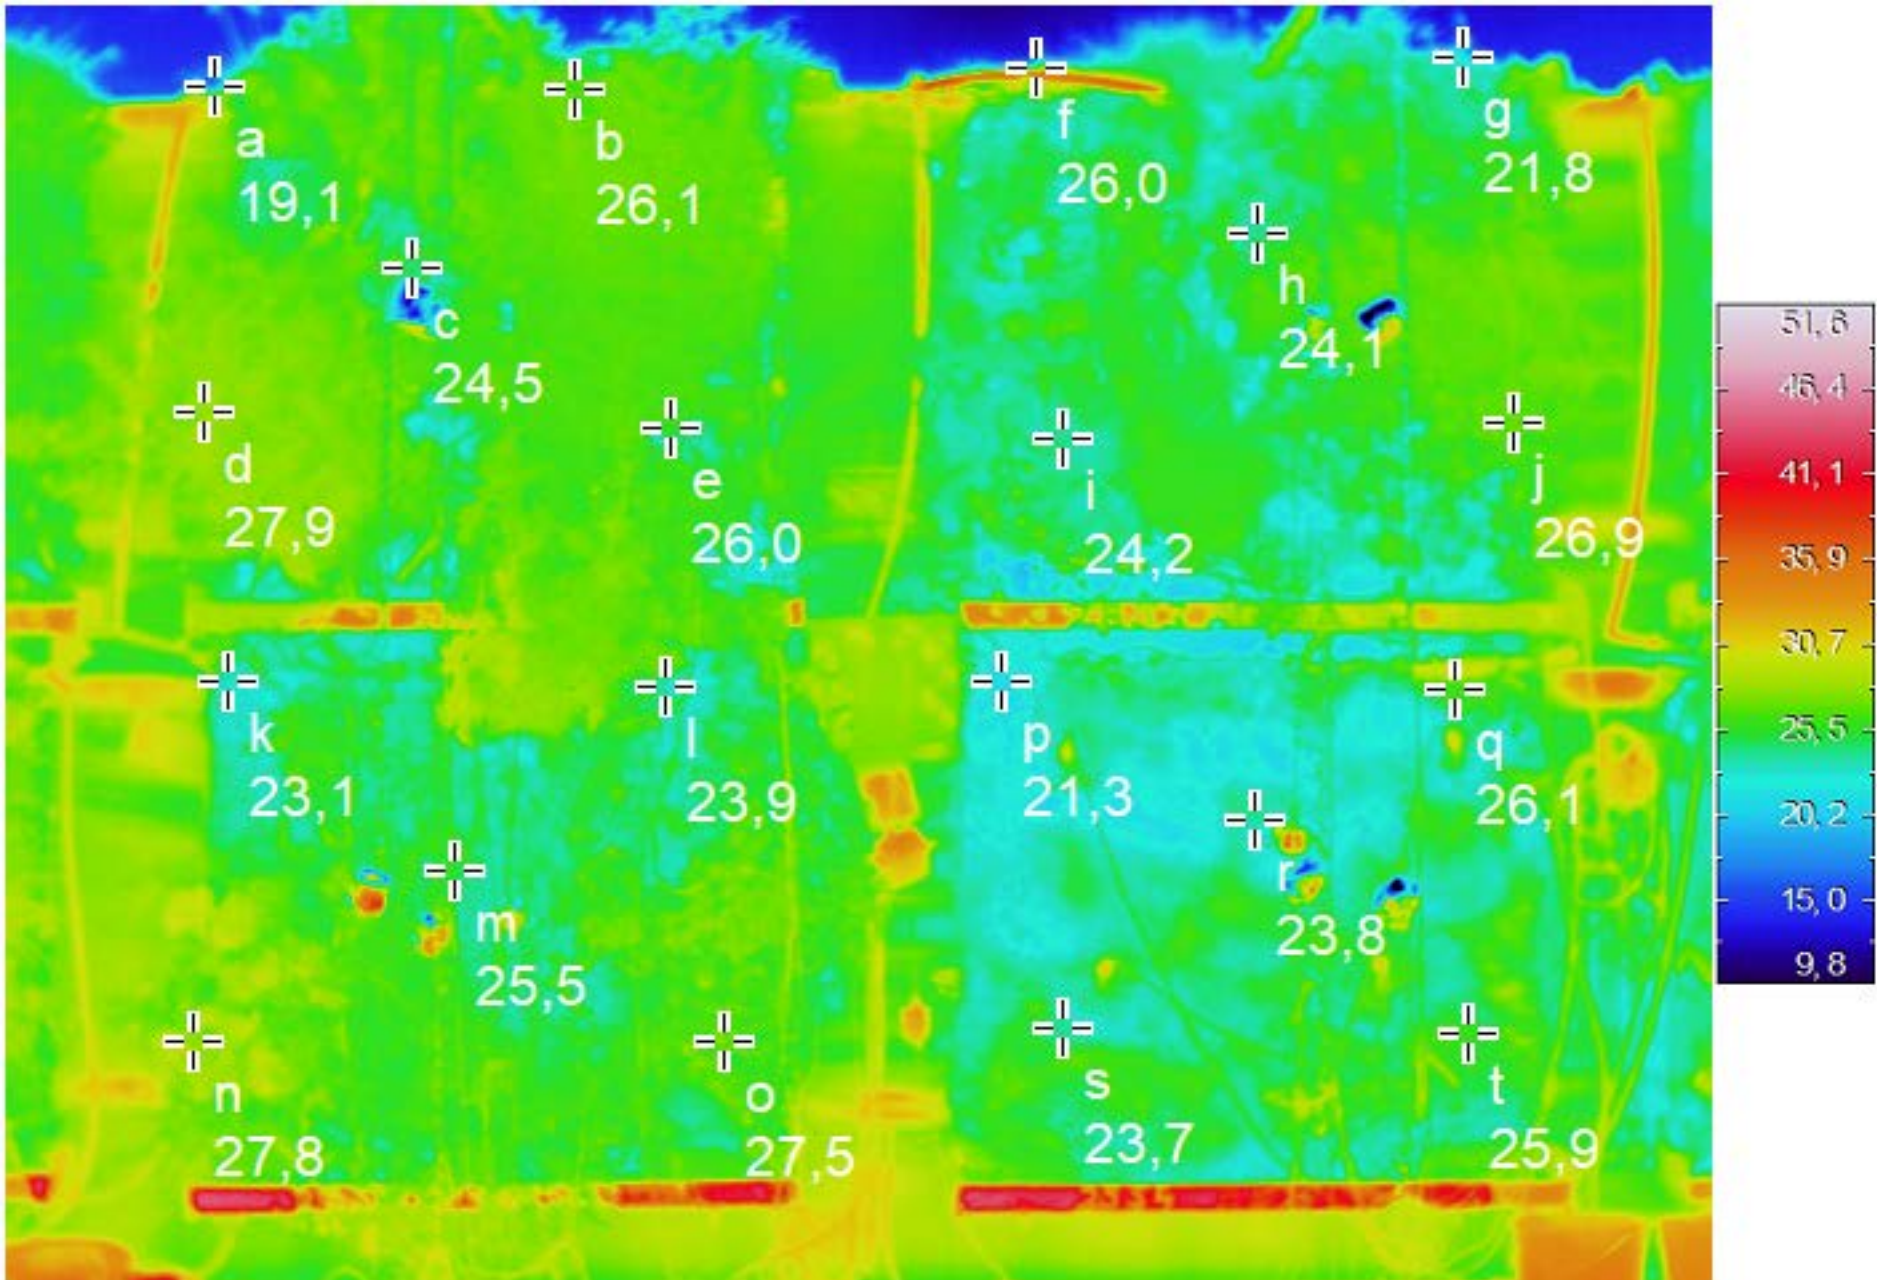

DateinameT02144IR.JPG  
Messtag:2019/06/19  
Messzeit:12:44:17  
Kommentar:  
Kameramodell:R500P  
Range:1[-20,0C-60,0C]  
BildmodusMEDx1,00  
Externes Objektiv:Standard  
Emissionsgrad:1.00  
Ambient Temp: 24,9IC  
IR Bildx1,00



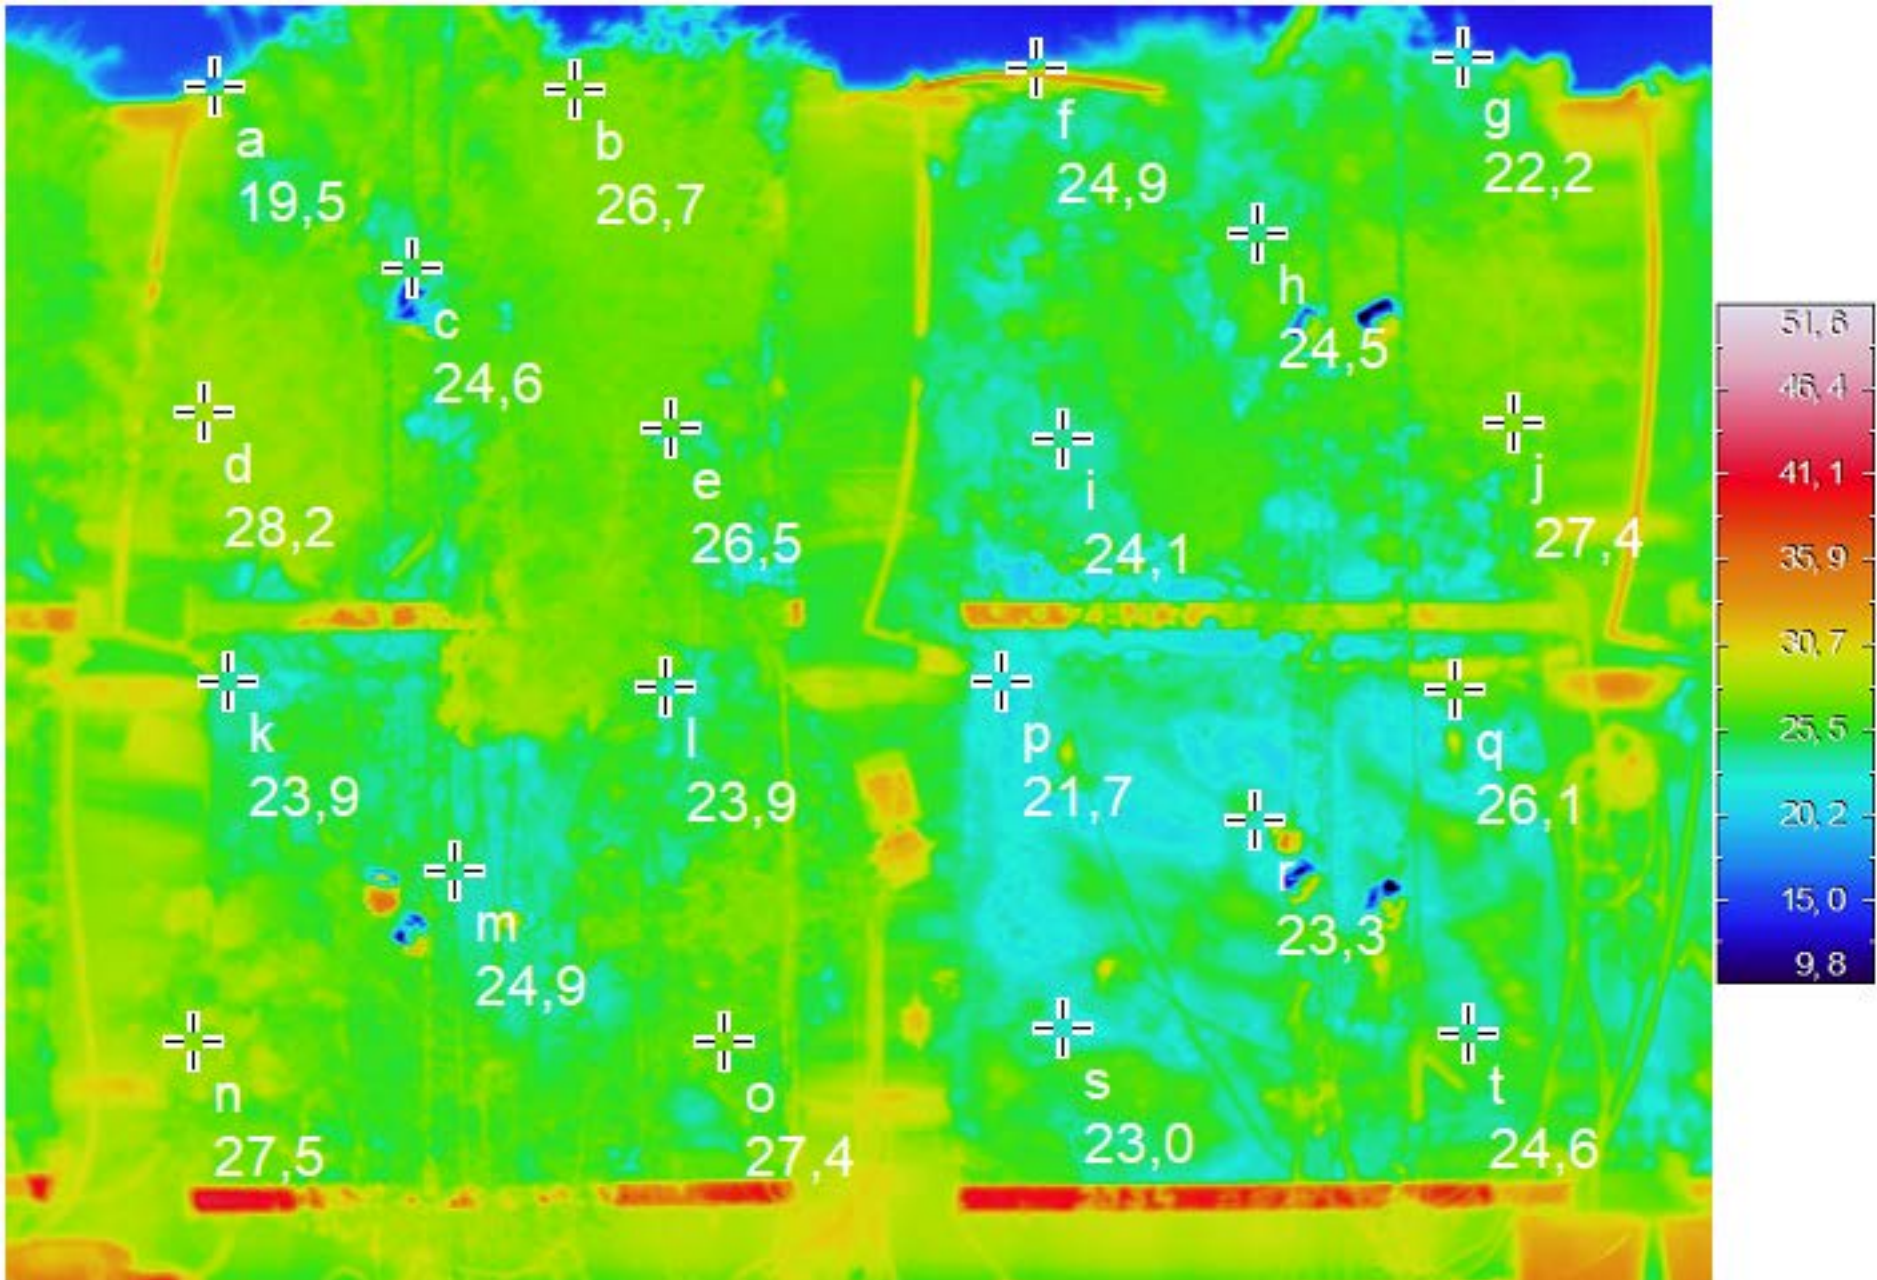

DateinameT02145IR.JPG  
Messtag:2019/06/19  
Messzeit:12:48:16  
Kommentar:  
Kameramodell:R500P  
Range:1[-20,0C-60,0C]  
BildmodusMEDx1,00  
Externes Objektiv:Standard  
Emissionsgrad:1.00  
Ambient Temp: 24,9IC  
IR Bildx1,00



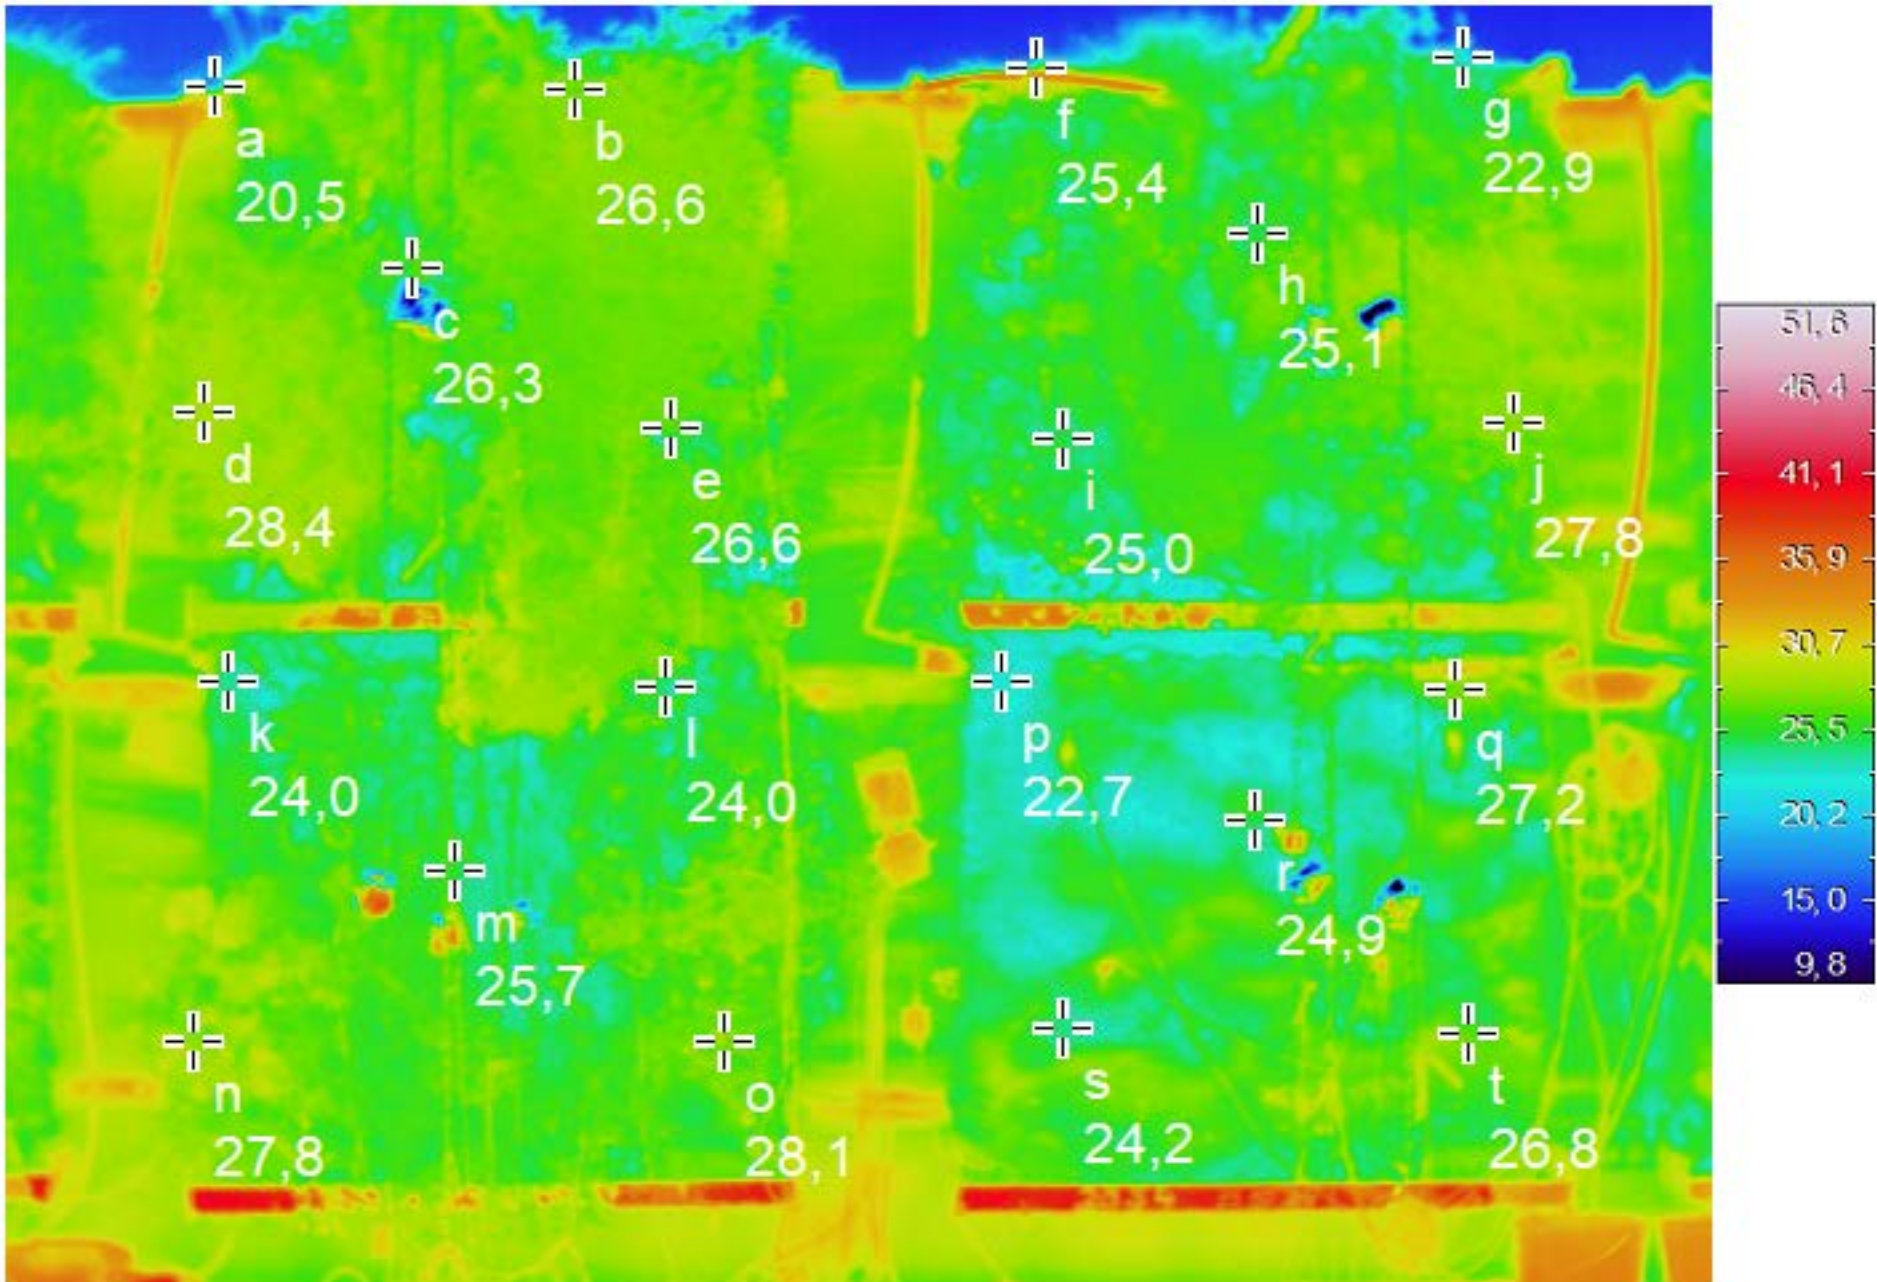

DateinameT02146IR.JPG  
Messtag:2019/06/19  
Messzeit:12:52:16  
Kommentar:  
Kameramodell:R500P  
Range:1[-20,0C-60,0C]  
BildmodusMEDx1,00  
Externes Objektiv:Standard  
Emissionsgrad:1.00  
Ambient Temp: 24,9IC  
IR Bildx1,00



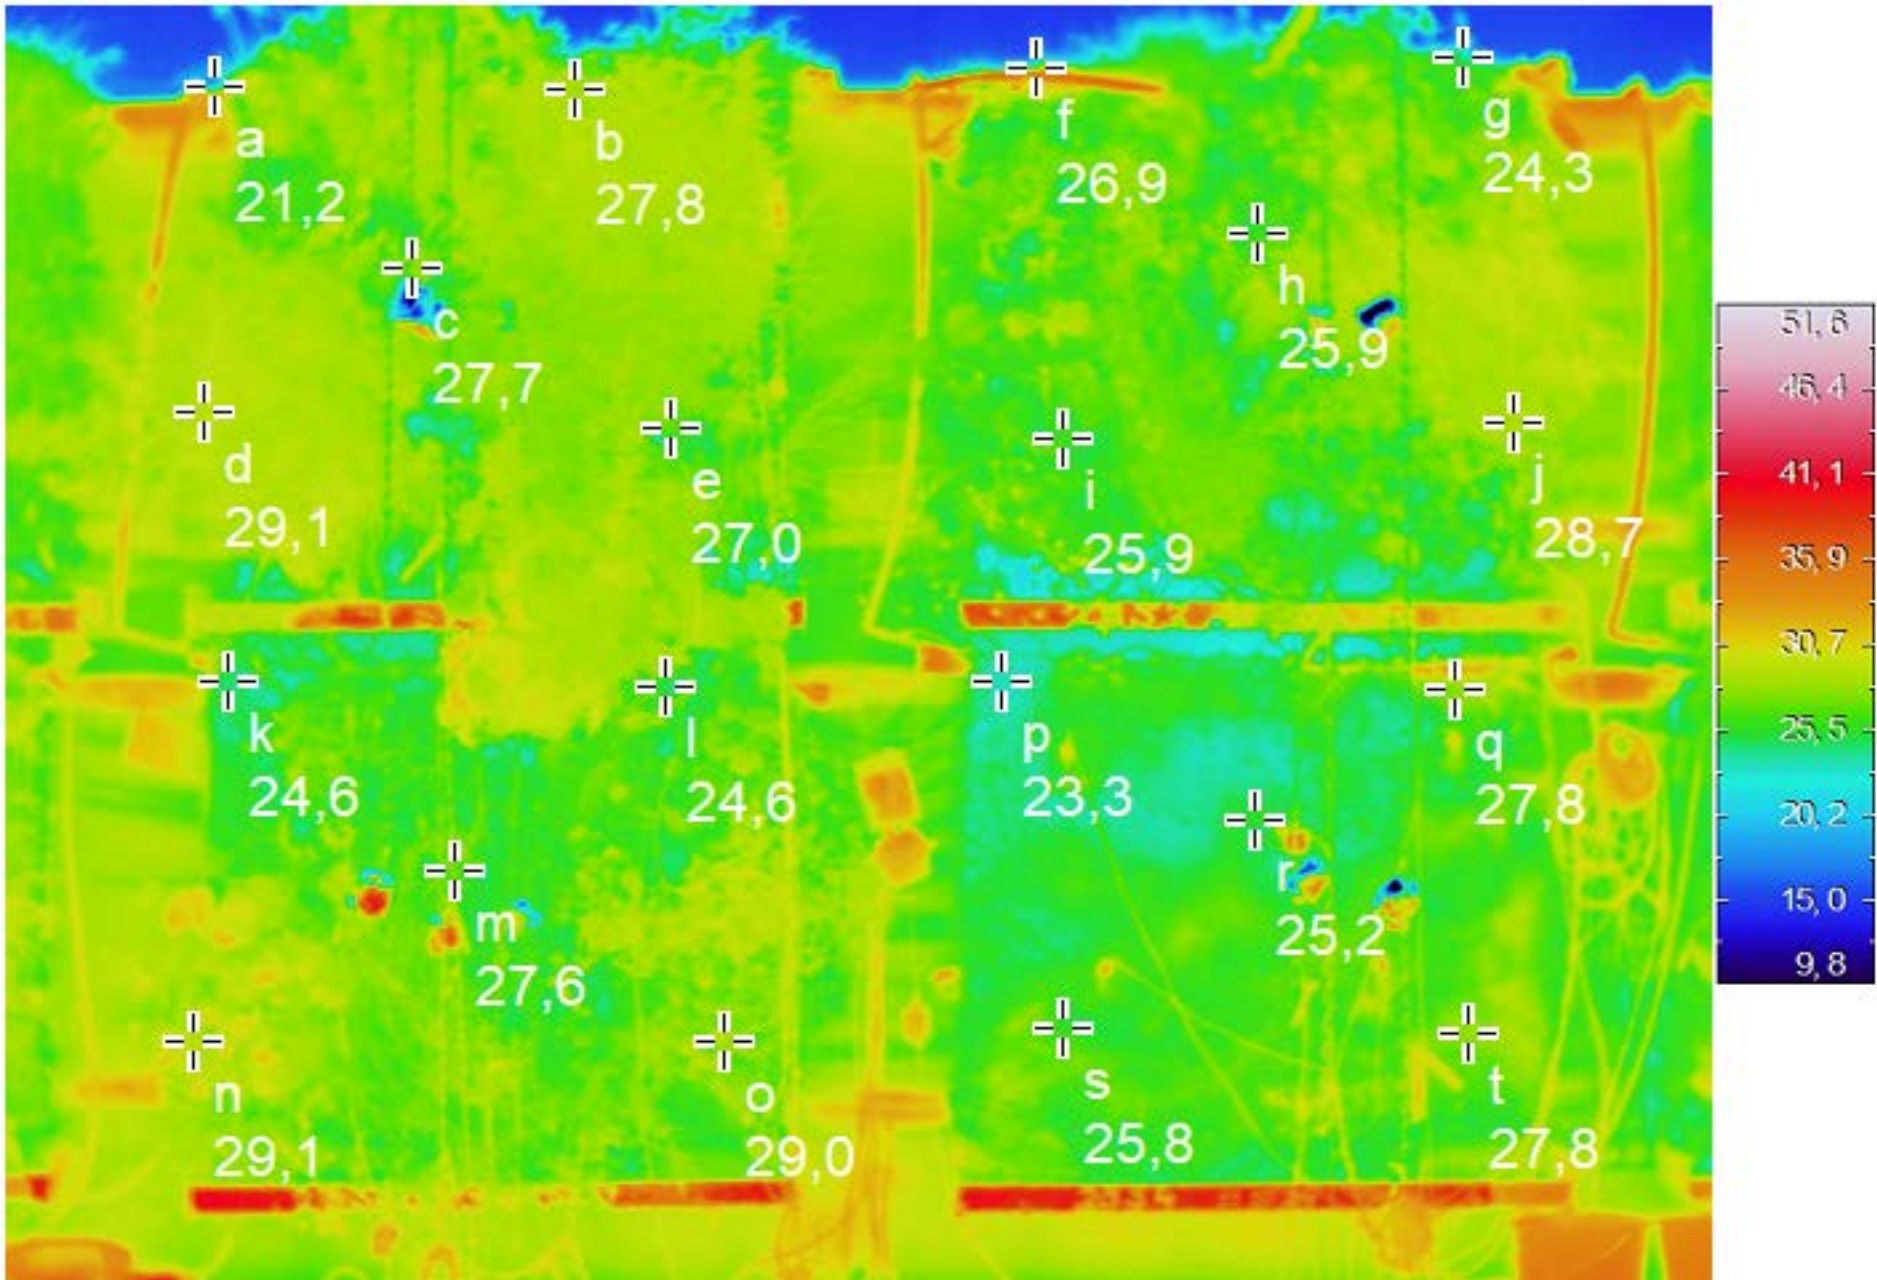

DateinameT02147IR.JPG  
Messtag:2019/06/19  
Messzeit:12:56:16  
Kommentar:  
Kameramodell:R500P  
Range:1[-20,0C-60,0C]  
BildmodusMEDx1,00  
Externes Objektiv:Standard  
Emissionsgrad:1.00  
Ambient Temp: 24,9IC  
IR Bildx1,00



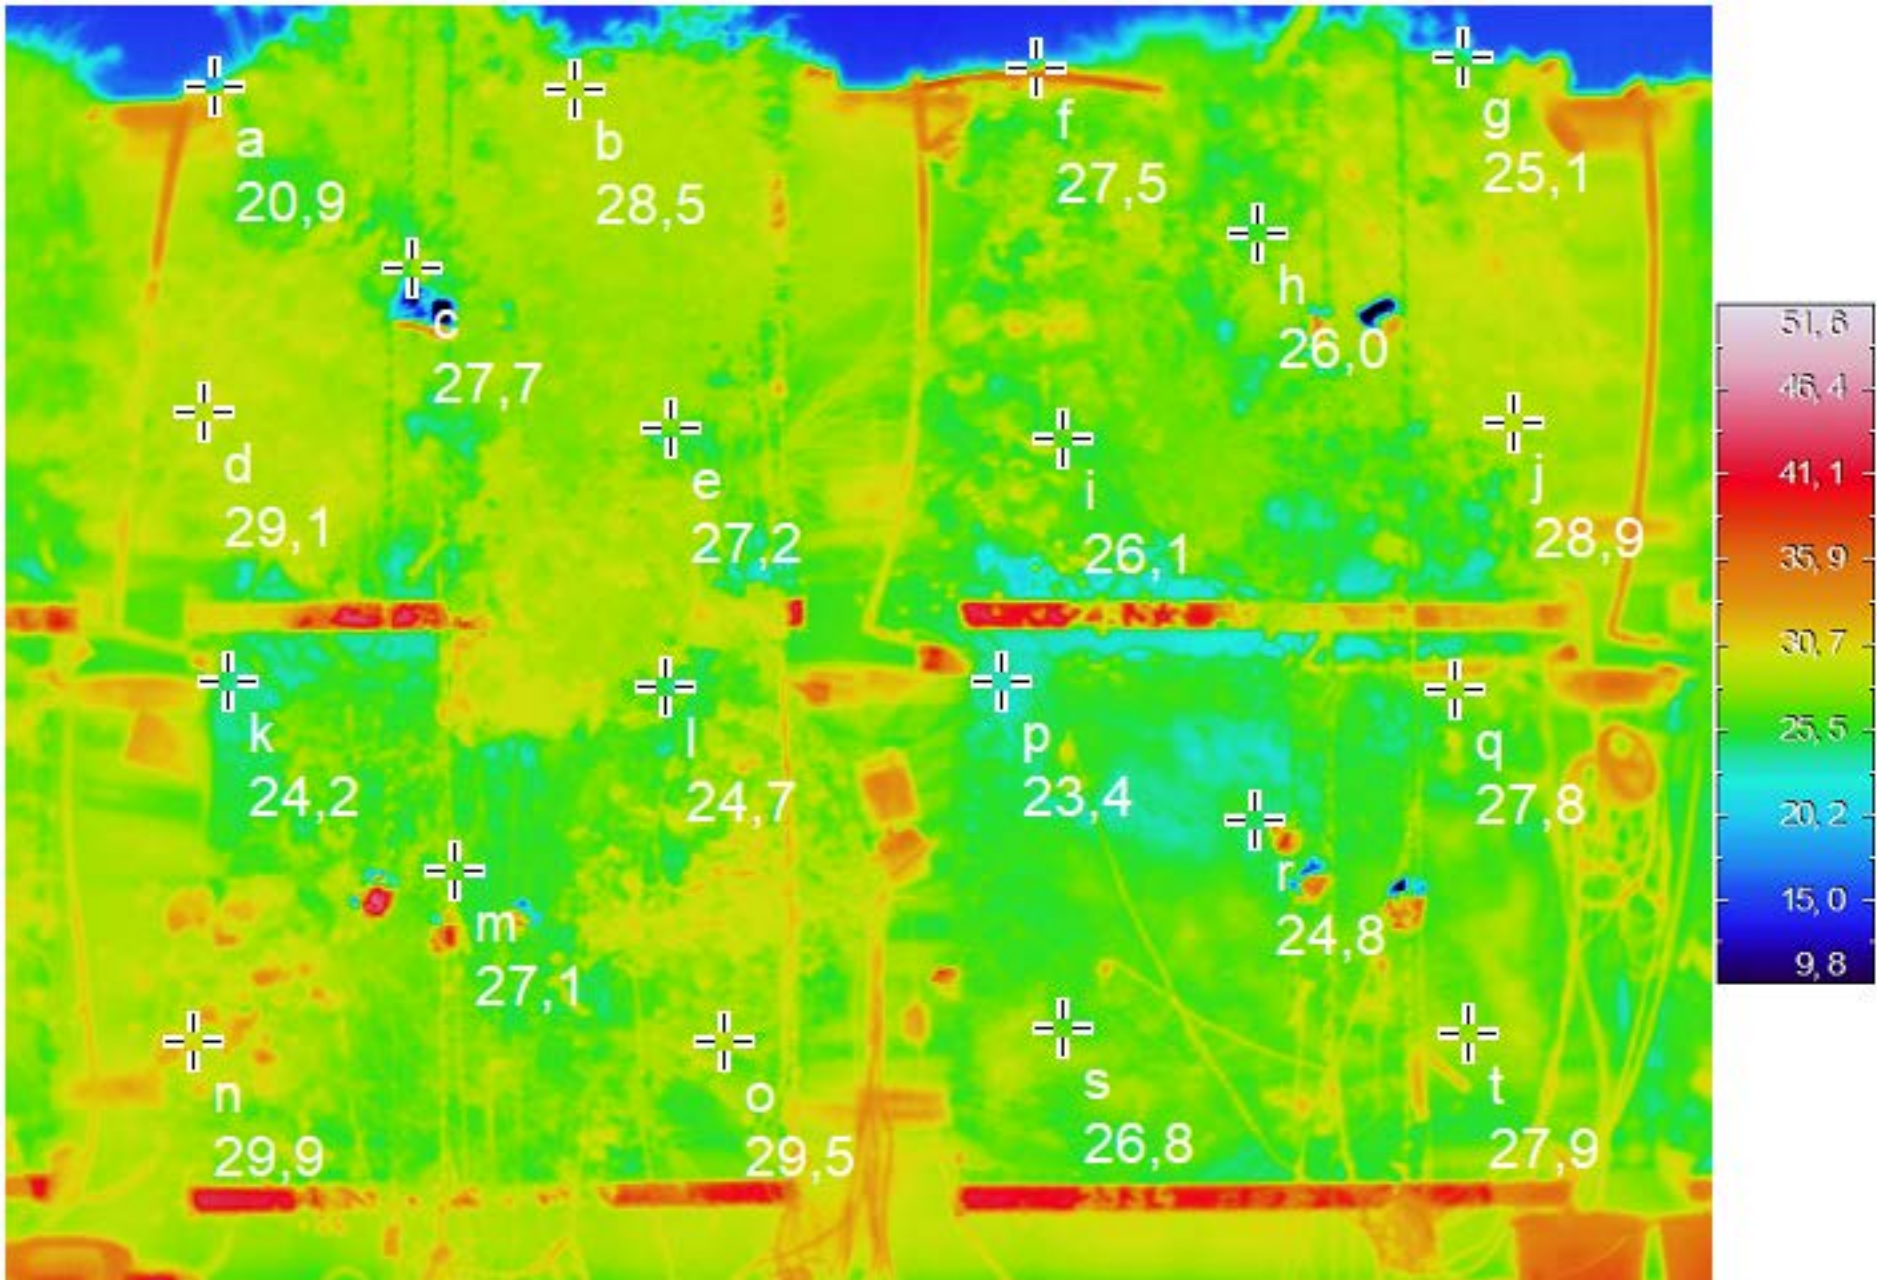

DateinameT02148IR.JPG  
Messtag:2019/06/19  
Messzeit:13:00:16  
Kommentar:  
Kameramodell:R500P  
Range:1[-20,0C-60,0C]  
BildmodusMEDx1,00  
Externes Objektiv:Standard  
Emissionsgrad:1.00  
Ambient Temp: 24,9IC  
IR Bildx1,00



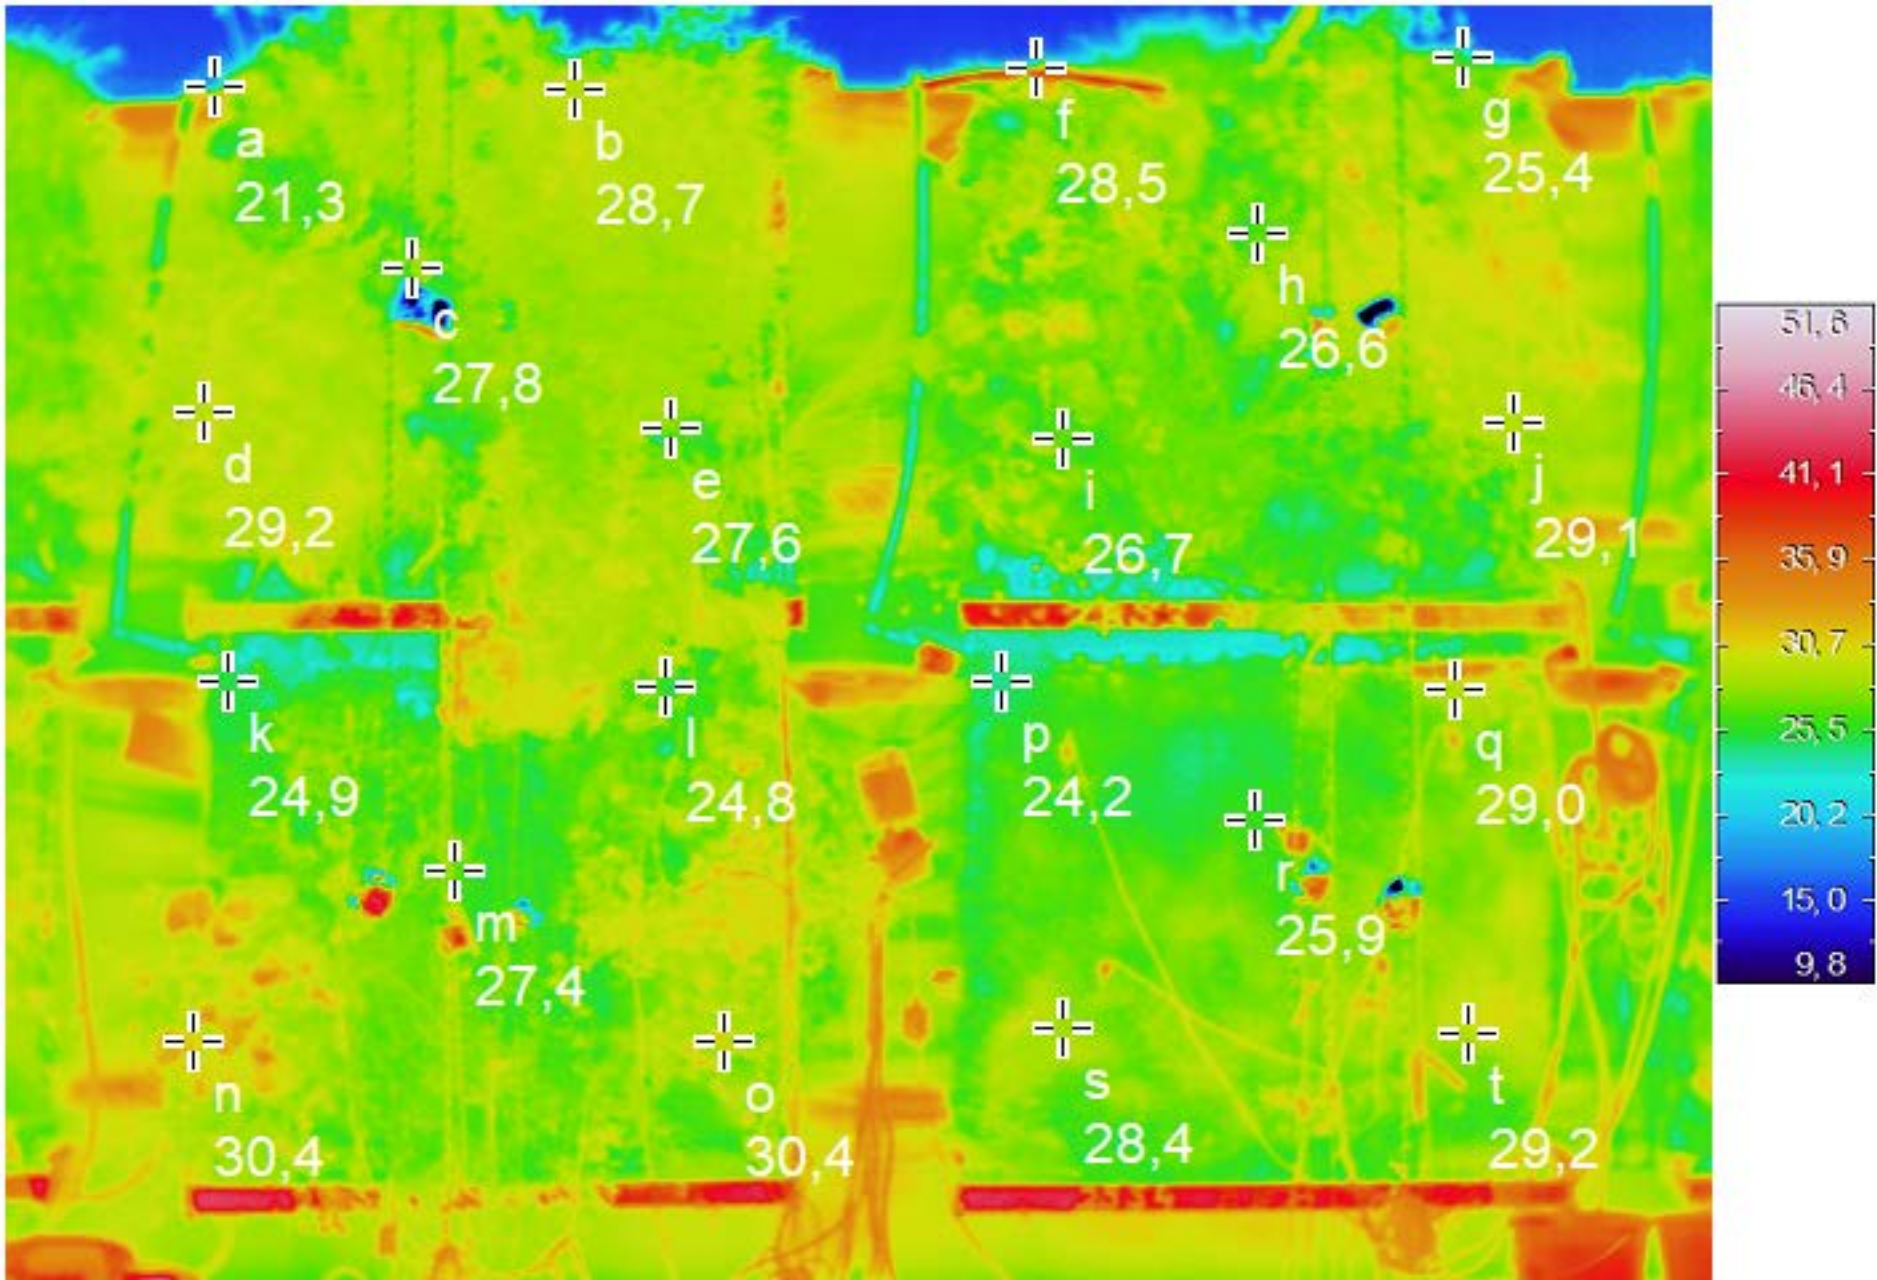

DateinameT02149IR.JPG  
Messtag:2019/06/19  
Messzeit:13:04:16  
Kommentar:  
Kameramodell:R500P  
Range:1[-20,0C-60,0C]  
BildmodusMEDx1,00  
Externes Objektiv:Standard  
Emissionsgrad:1.00  
Ambient Temp: 24,9IC  
IR Bildx1,00



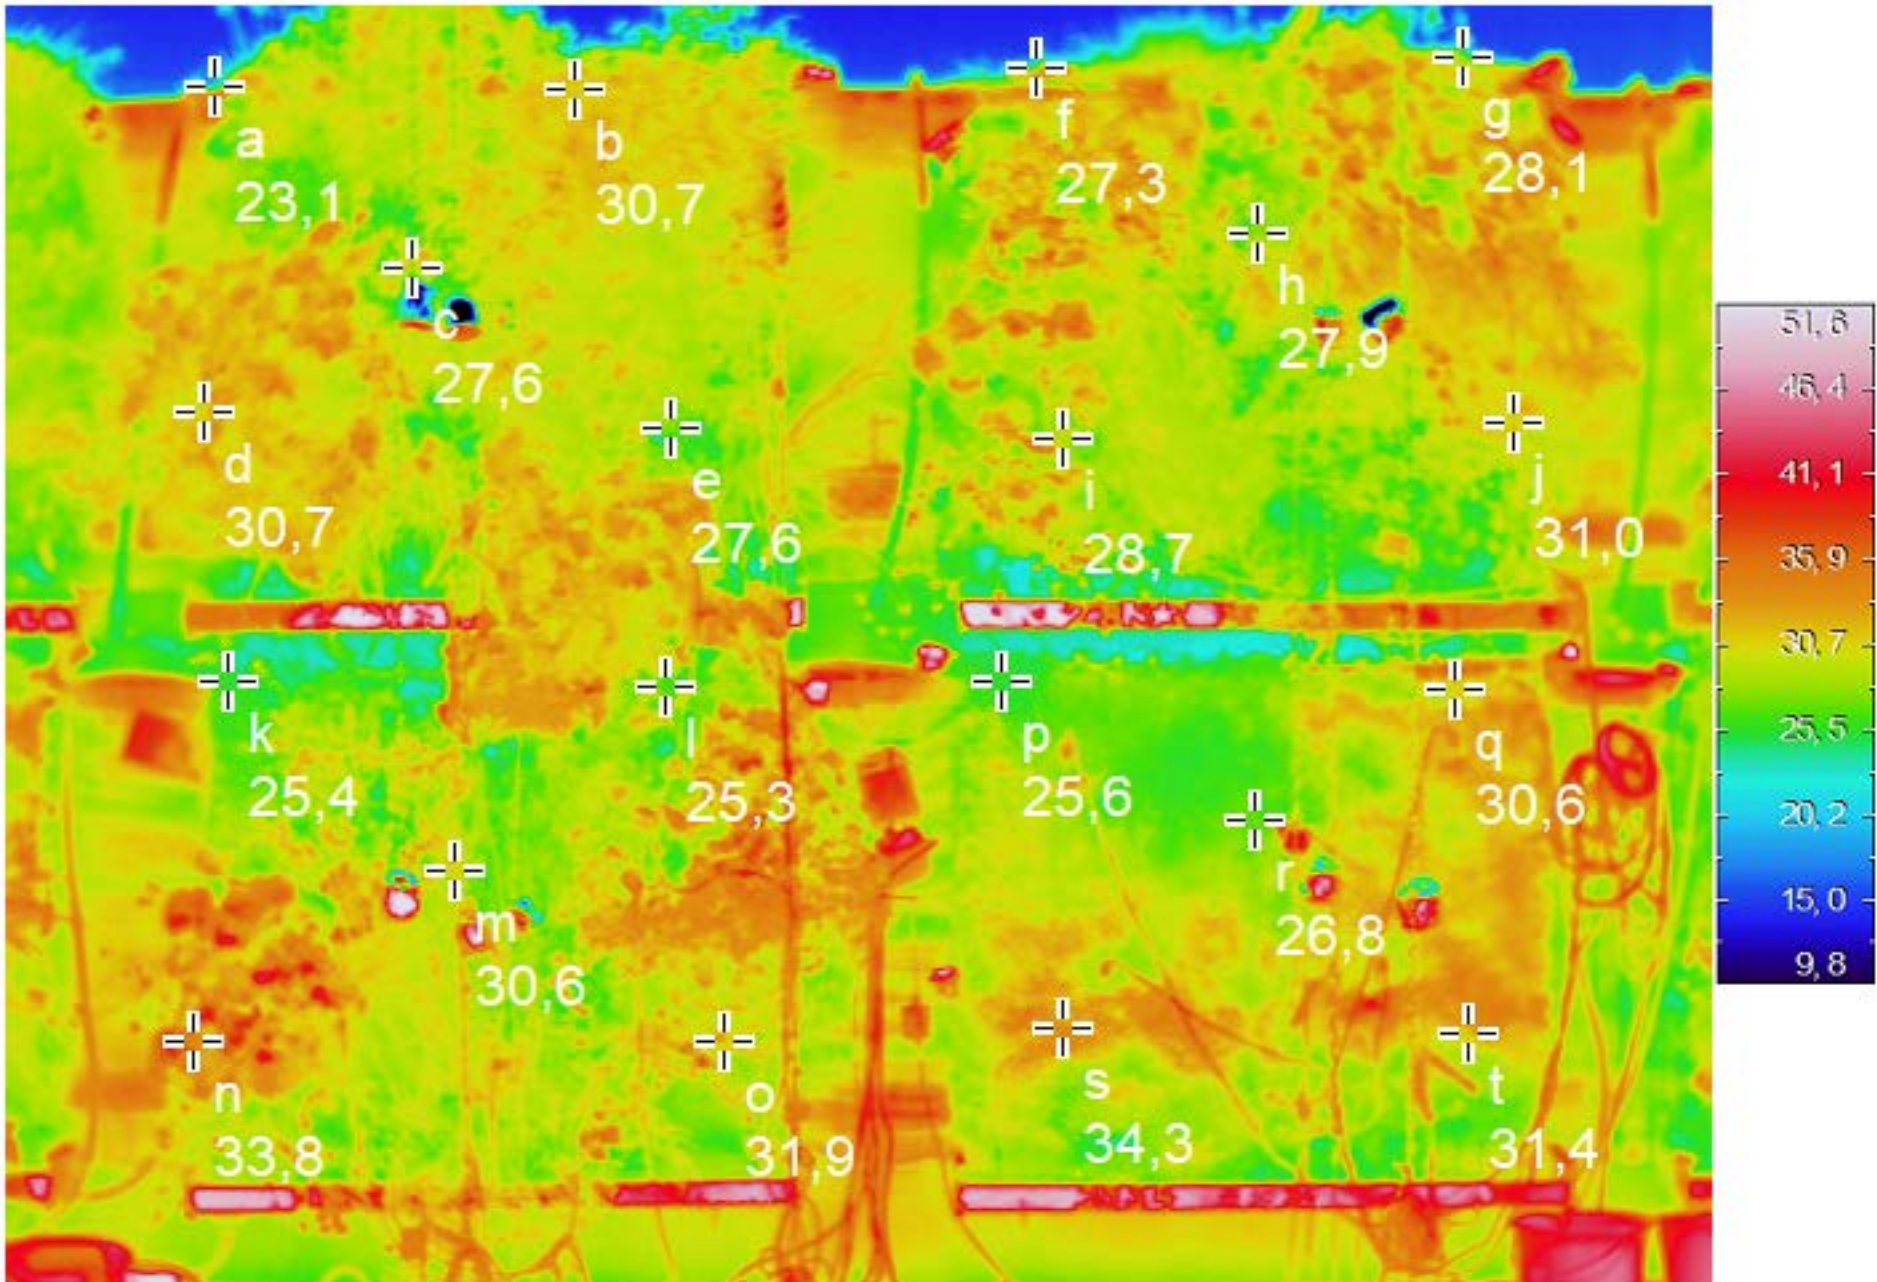

DateinameT02150IR.JPG  
Messtag:2019/06/19  
Messzeit:13:08:16  
Kommentar:  
Kameramodell:R500P  
Range:1[-20,0C-60,0C]  
BildmodusMEDx1,00  
Externes Objektiv:Standard  
Emissionsgrad:1.00  
Ambient Temp: 24,9IC  
IR Bildx1,00



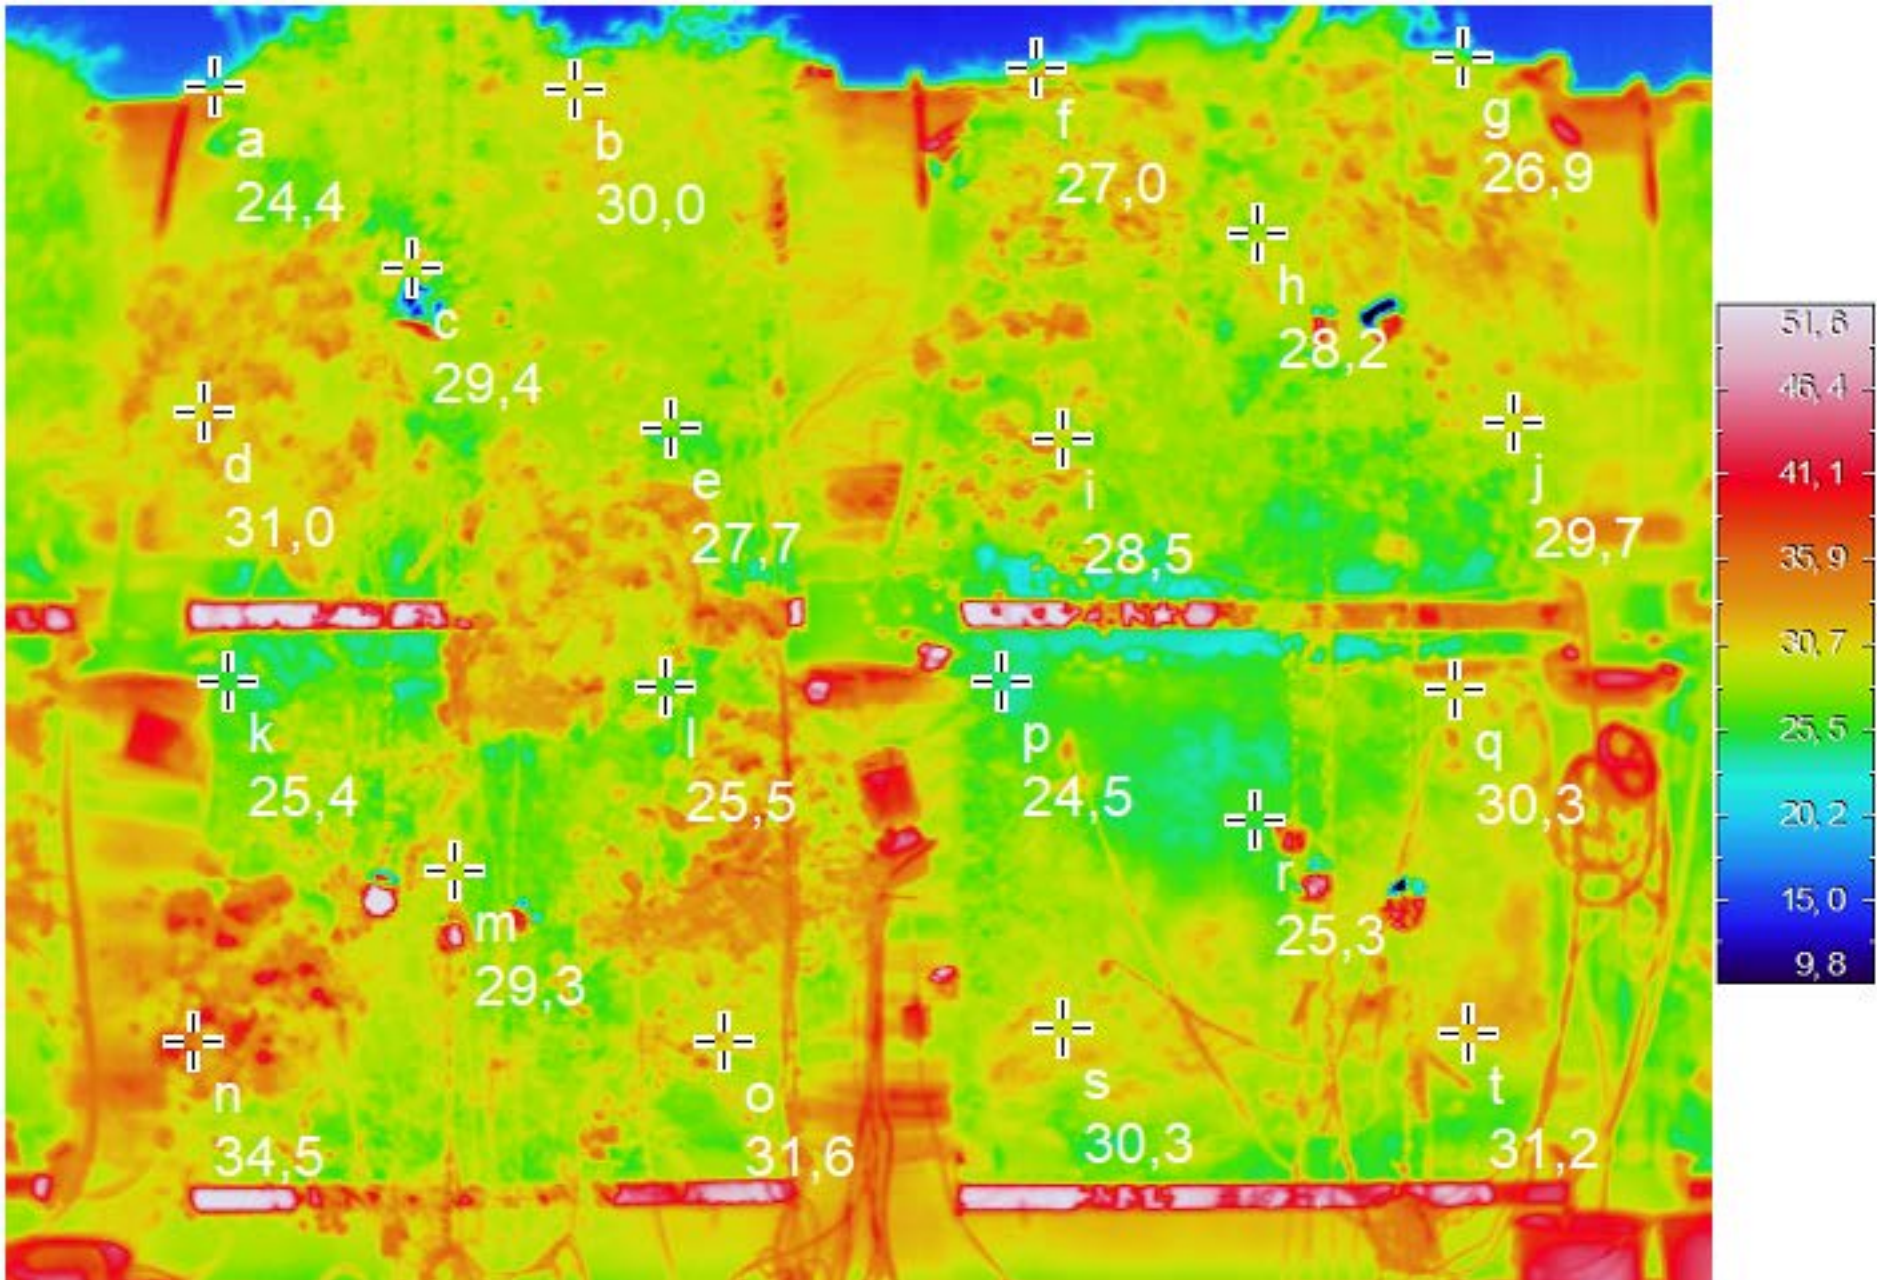

DateinameT02151IR.JPG  
Messtag:2019/06/19  
Messzeit:13:12:16  
Kommentar:  
Kameramodell:R500P  
Range:1[-20,0C-60,0C]  
BildmodusMEDx1,00  
Externes Objektiv:Standard  
Emissionsgrad:1.00  
Ambient Temp: 24,9IC  
IR Bildx1,00



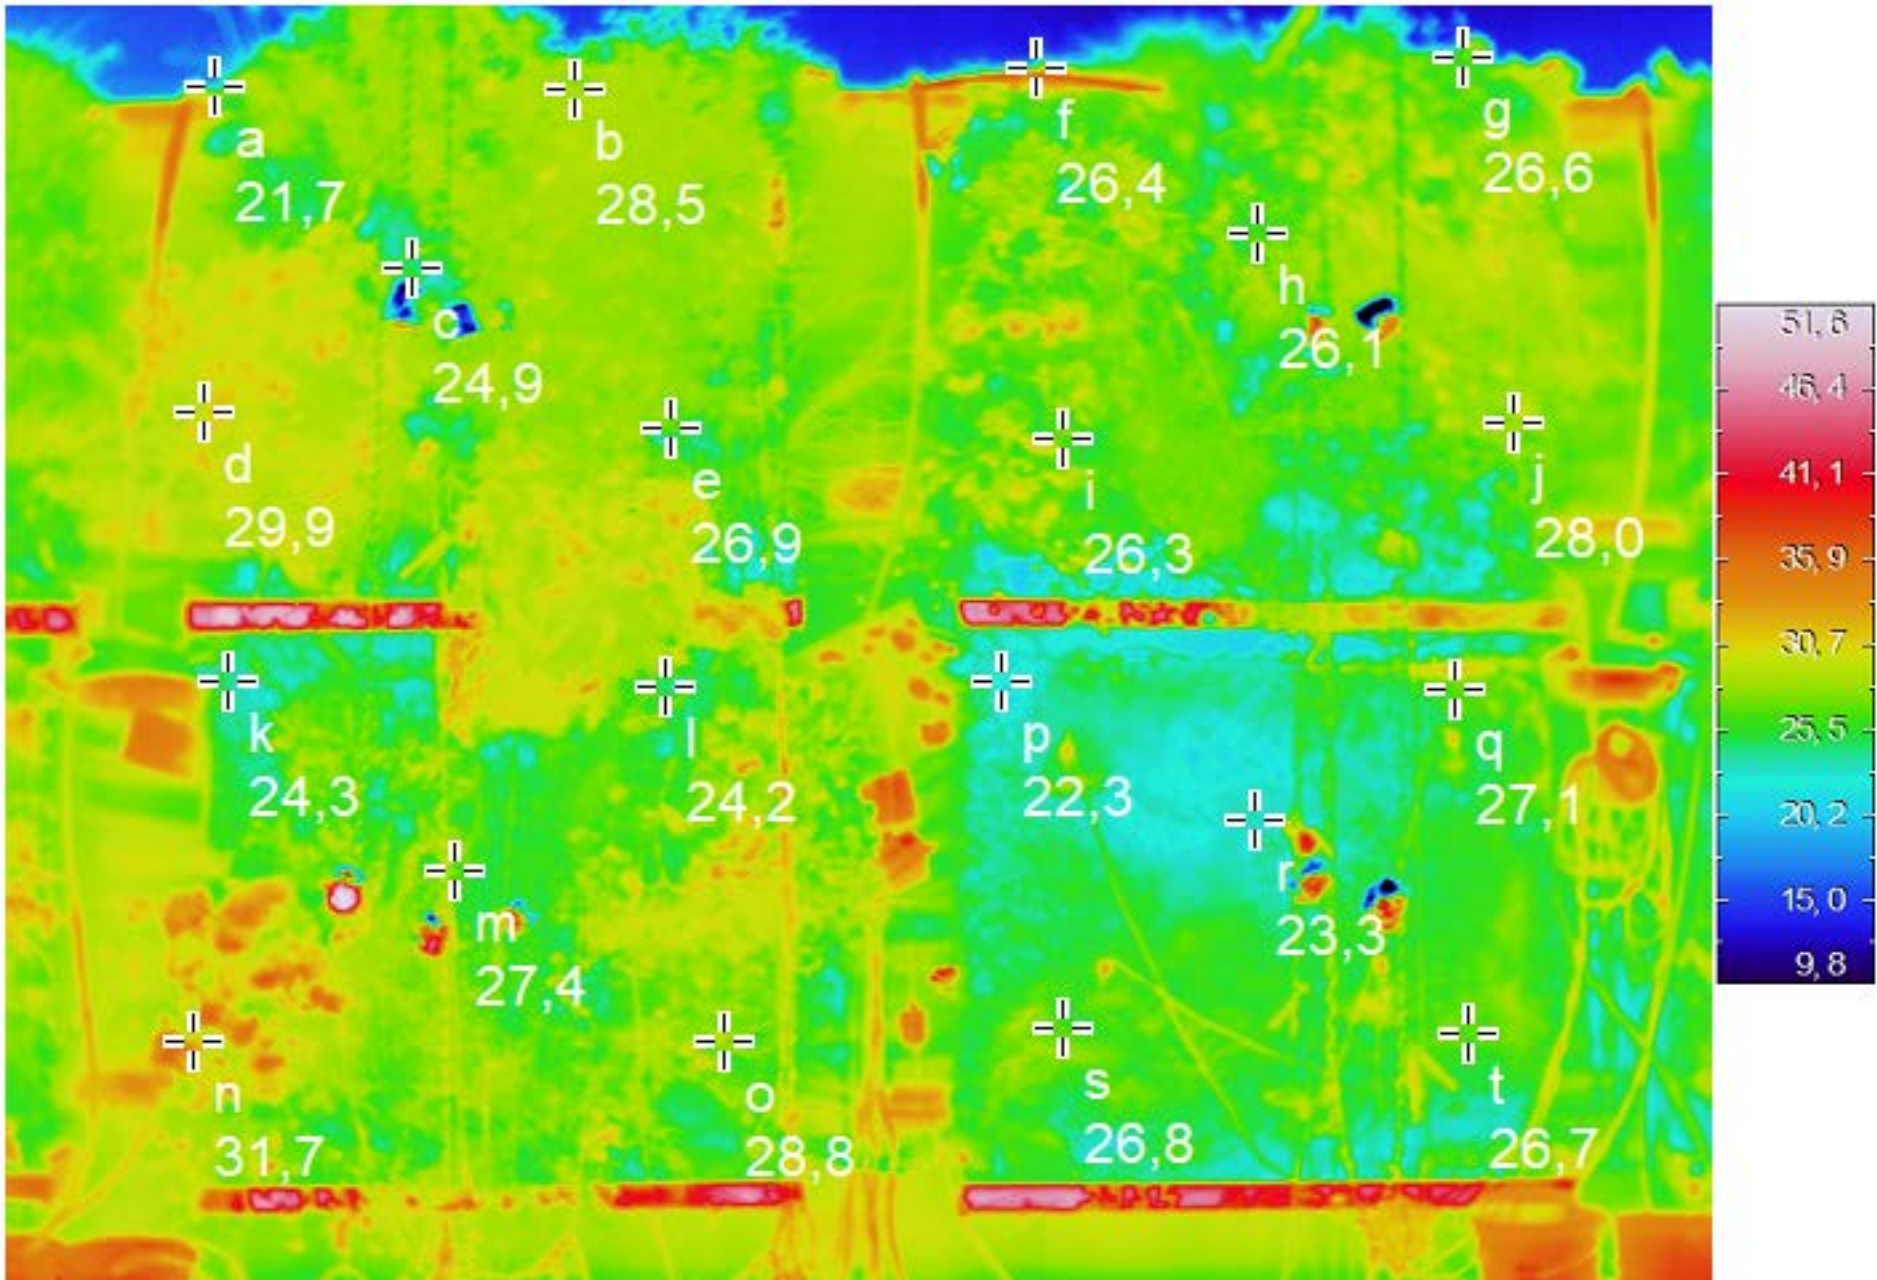

DateinameT02153IR.JPG  
Messtag:2019/06/19  
Messzeit:13:20:16  
Kommentar:  
Kameramodell:R500P  
Range:1[-20,0C-60,0C]  
BildmodusMEDx1,00  
Externes Objektiv:Standard  
Emissionsgrad:1.00  
Ambient Temp: 24,9IC  
IR Bildx1,00



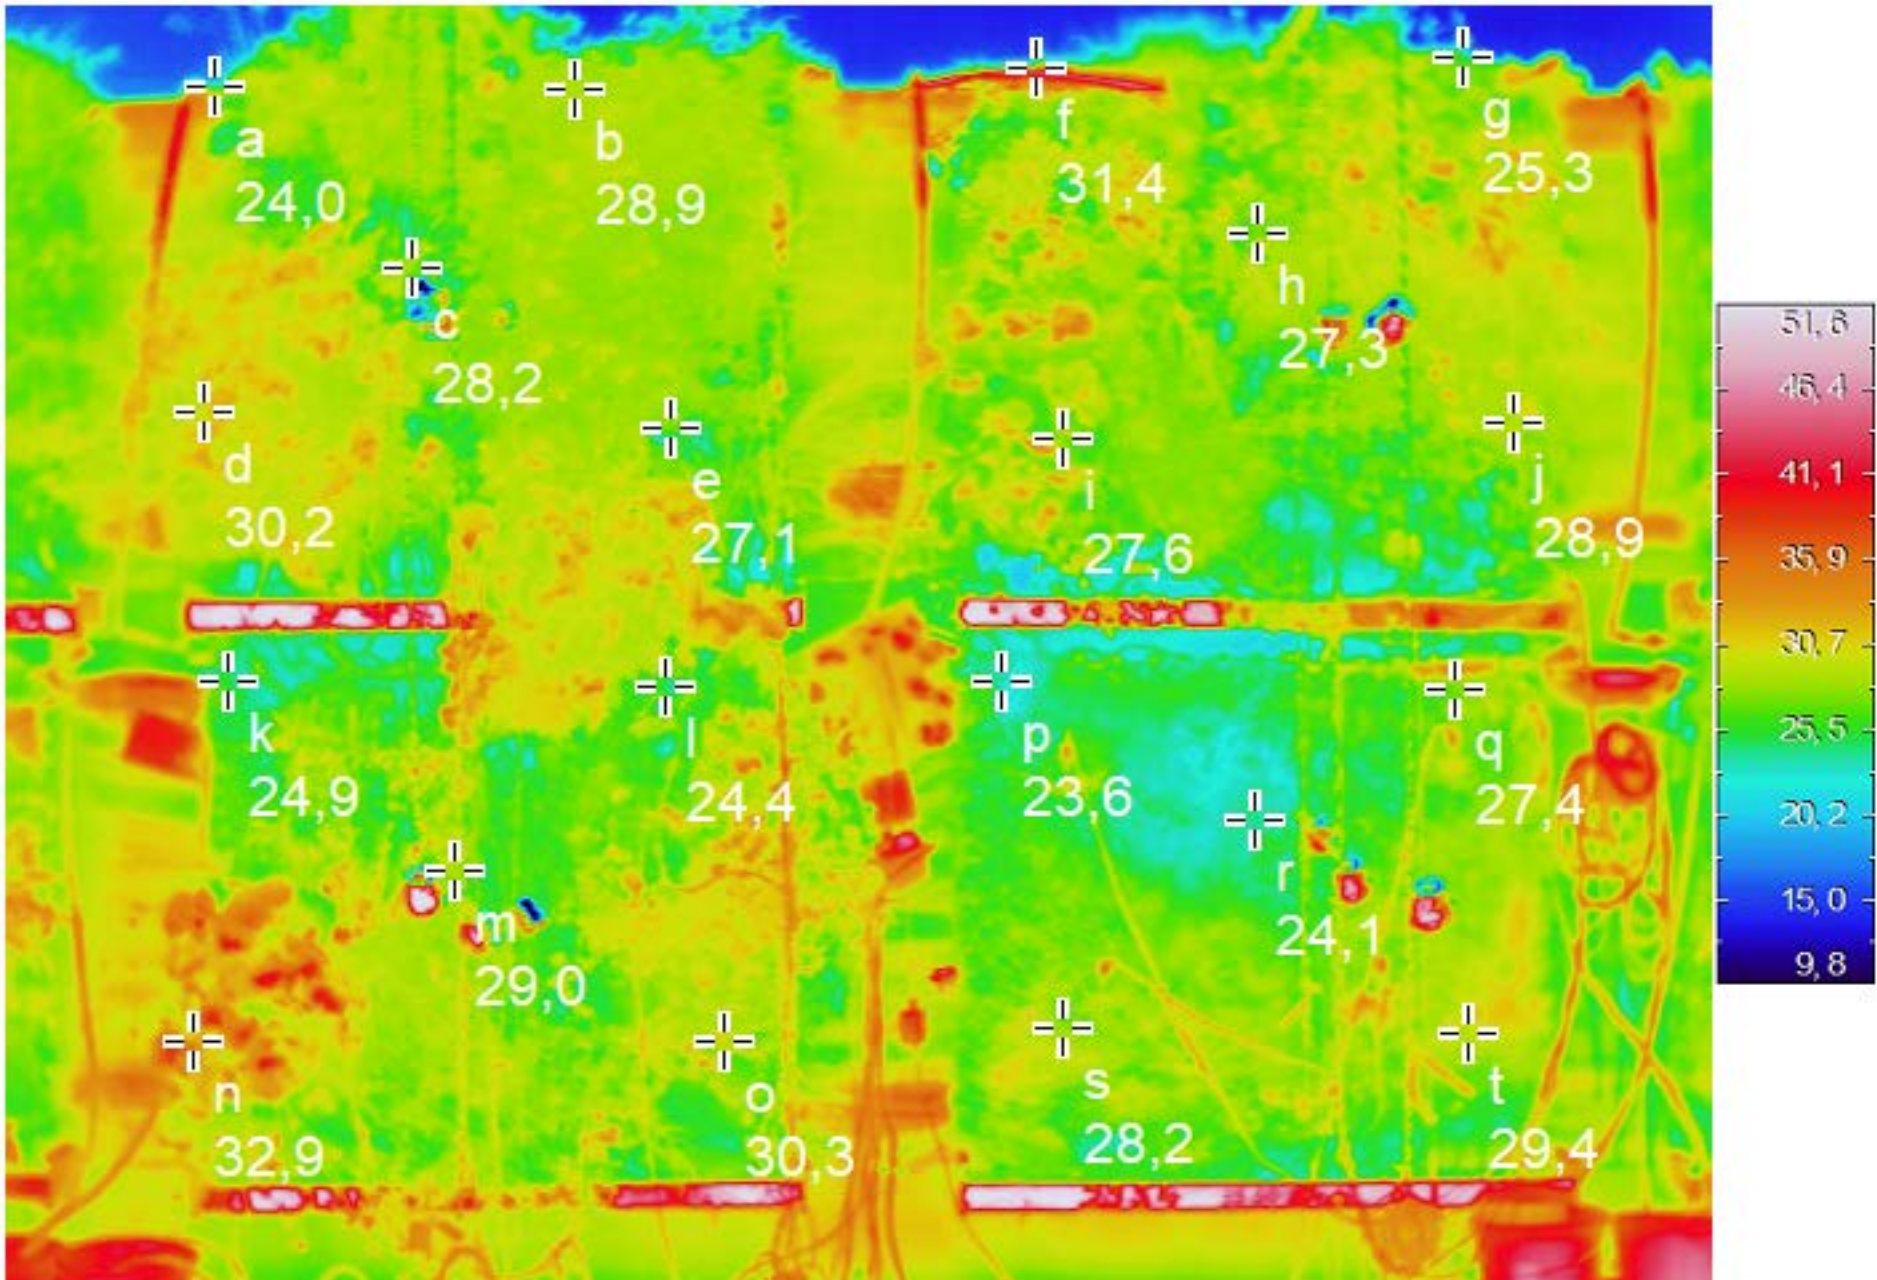

DateinameT02154IR.JPG  
Messtag:2019/06/19  
Messzeit:13:24:17  
Kommentar:  
Kameramodell:R500P  
Range:1[-20,0C-60,0C]  
BildmodusMEDx1,00  
Externes Objektiv:Standard  
Emissionsgrad:1.00  
Ambient Temp: 24,9IC  
IR Bildx1,00



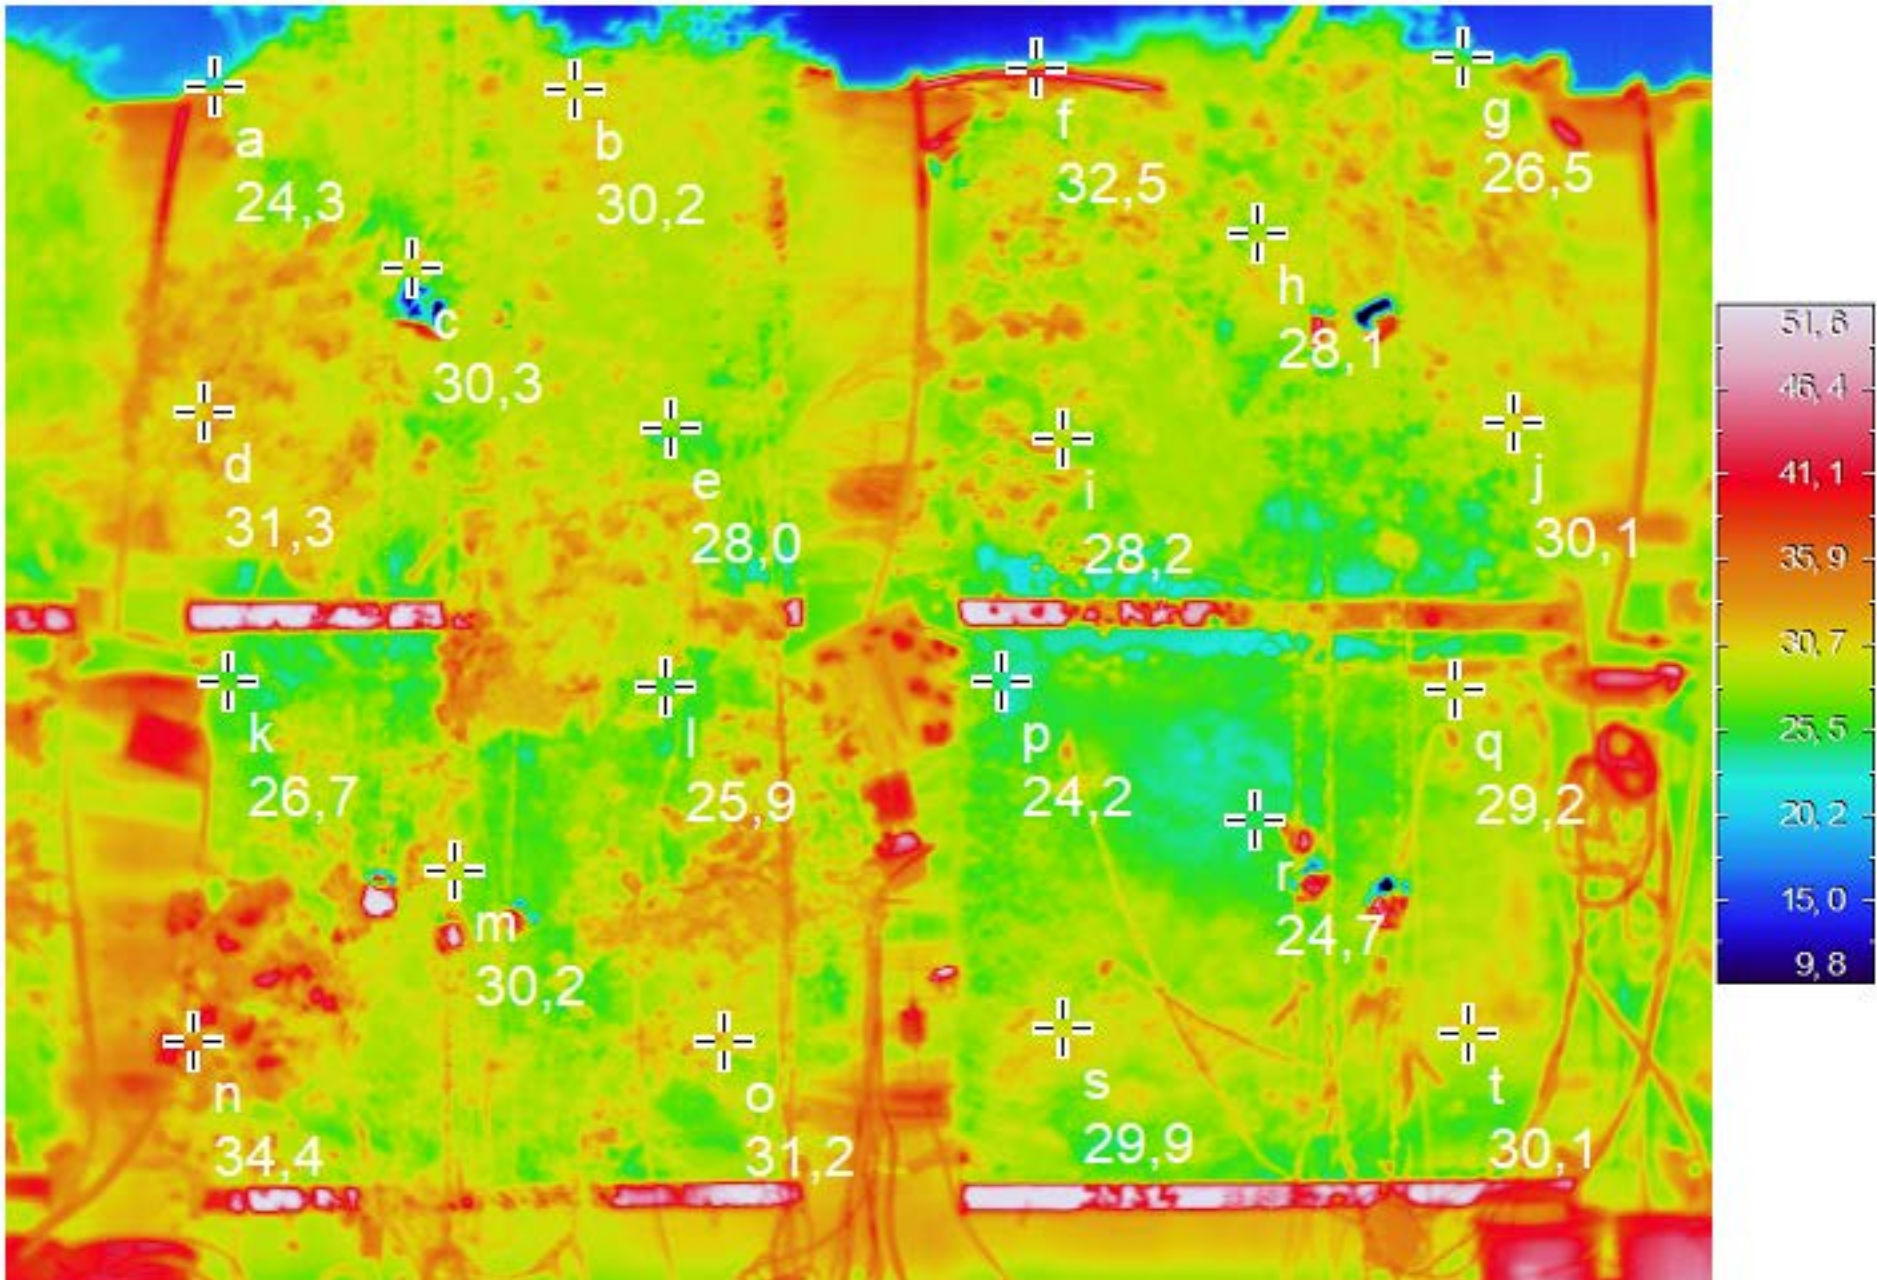

DateinameT02155IR.JPG  
Messtag:2019/06/19  
Messzeit:13:28:16  
Kommentar:  
Kameramodell:R500P  
Range:1[-20,0C-60,0C]  
BildmodusMEDx1,00  
Externes Objektiv:Standard  
Emissionsgrad:1.00  
Ambient Temp: 24,9IC  
IR Bildx1,00



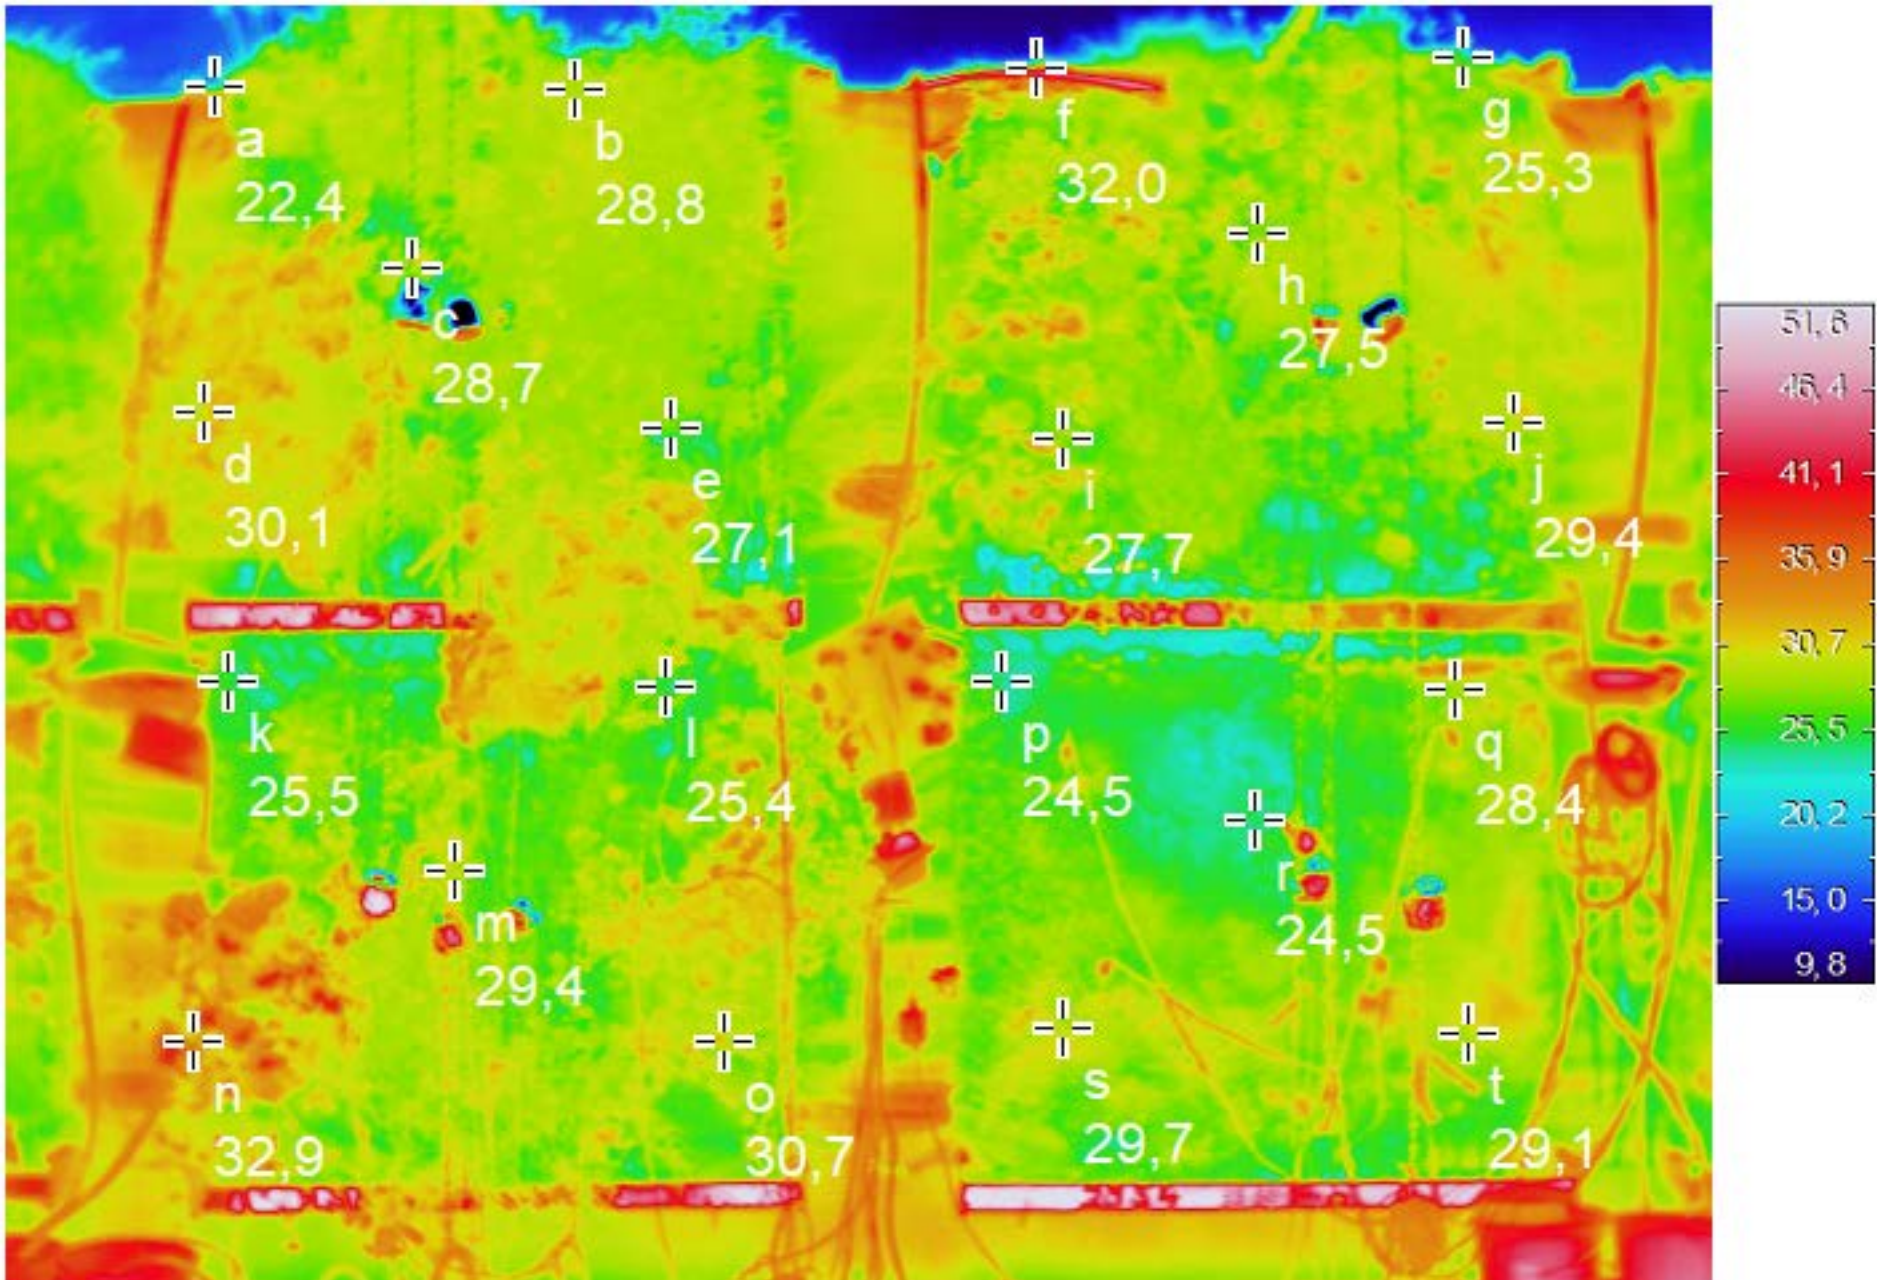

DateinameT02156IR.JPG  
Messtag:2019/06/19  
Messzeit:13:32:17  
Kommentar:  
Kameramodell:R500P  
Range:1[-20,0C-60,0C]  
BildmodusMEDx1,00  
Externes Objektiv:Standard  
Emissionsgrad:1.00  
Ambient Temp: 24,9IC  
IR Bildx1,00



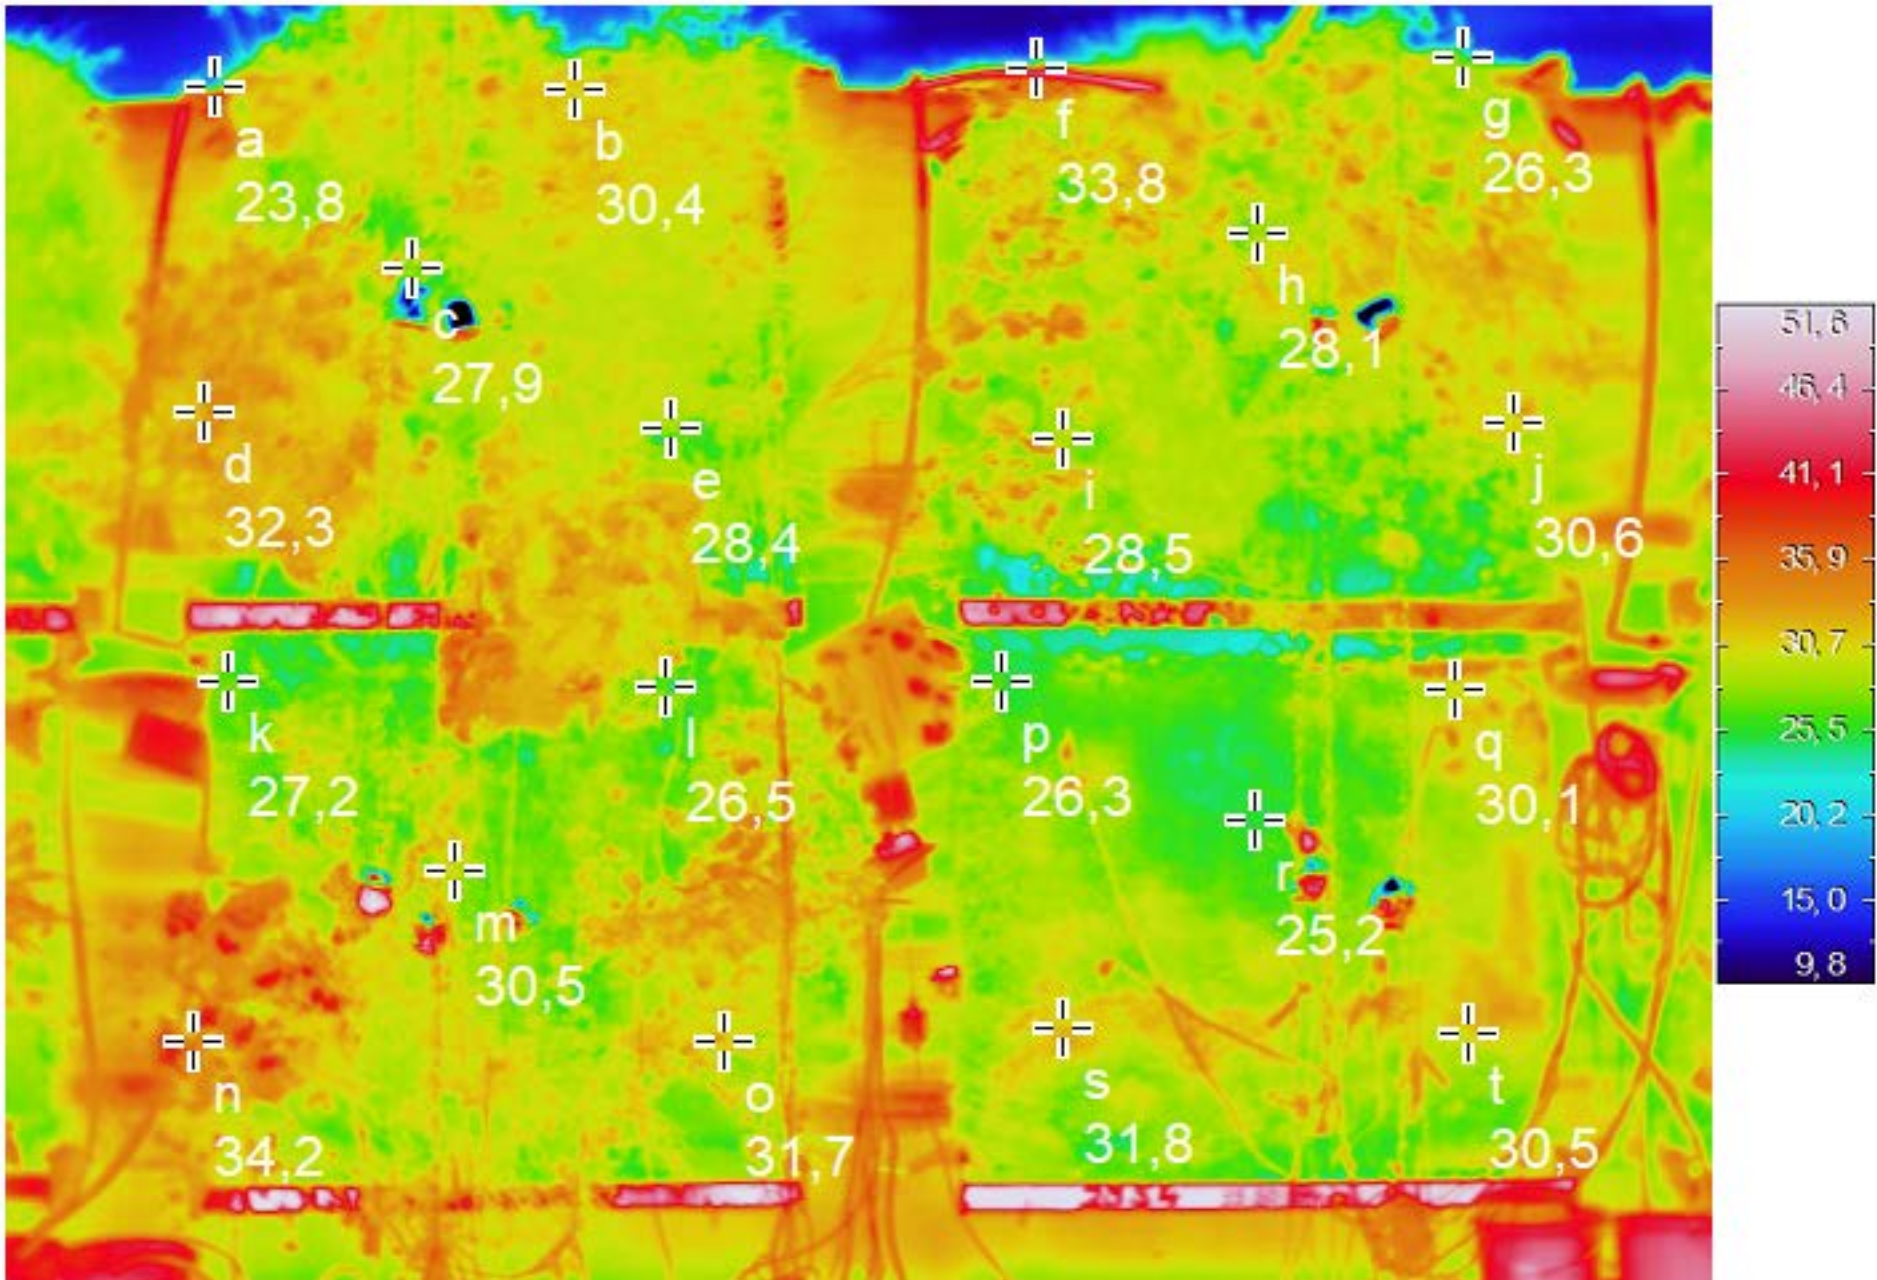

DateinameT02157IR.JPG  
Messtag:2019/06/19  
Messzeit:13:36:16  
Kommentar:  
Kameramodell:R500P  
Range:1[-20,0C-60,0C]  
BildmodusMEDx1,00  
Externes Objektiv:Standard  
Emissionsgrad:1.00  
Ambient Temp: 24,9IC  
IR Bildx1,00



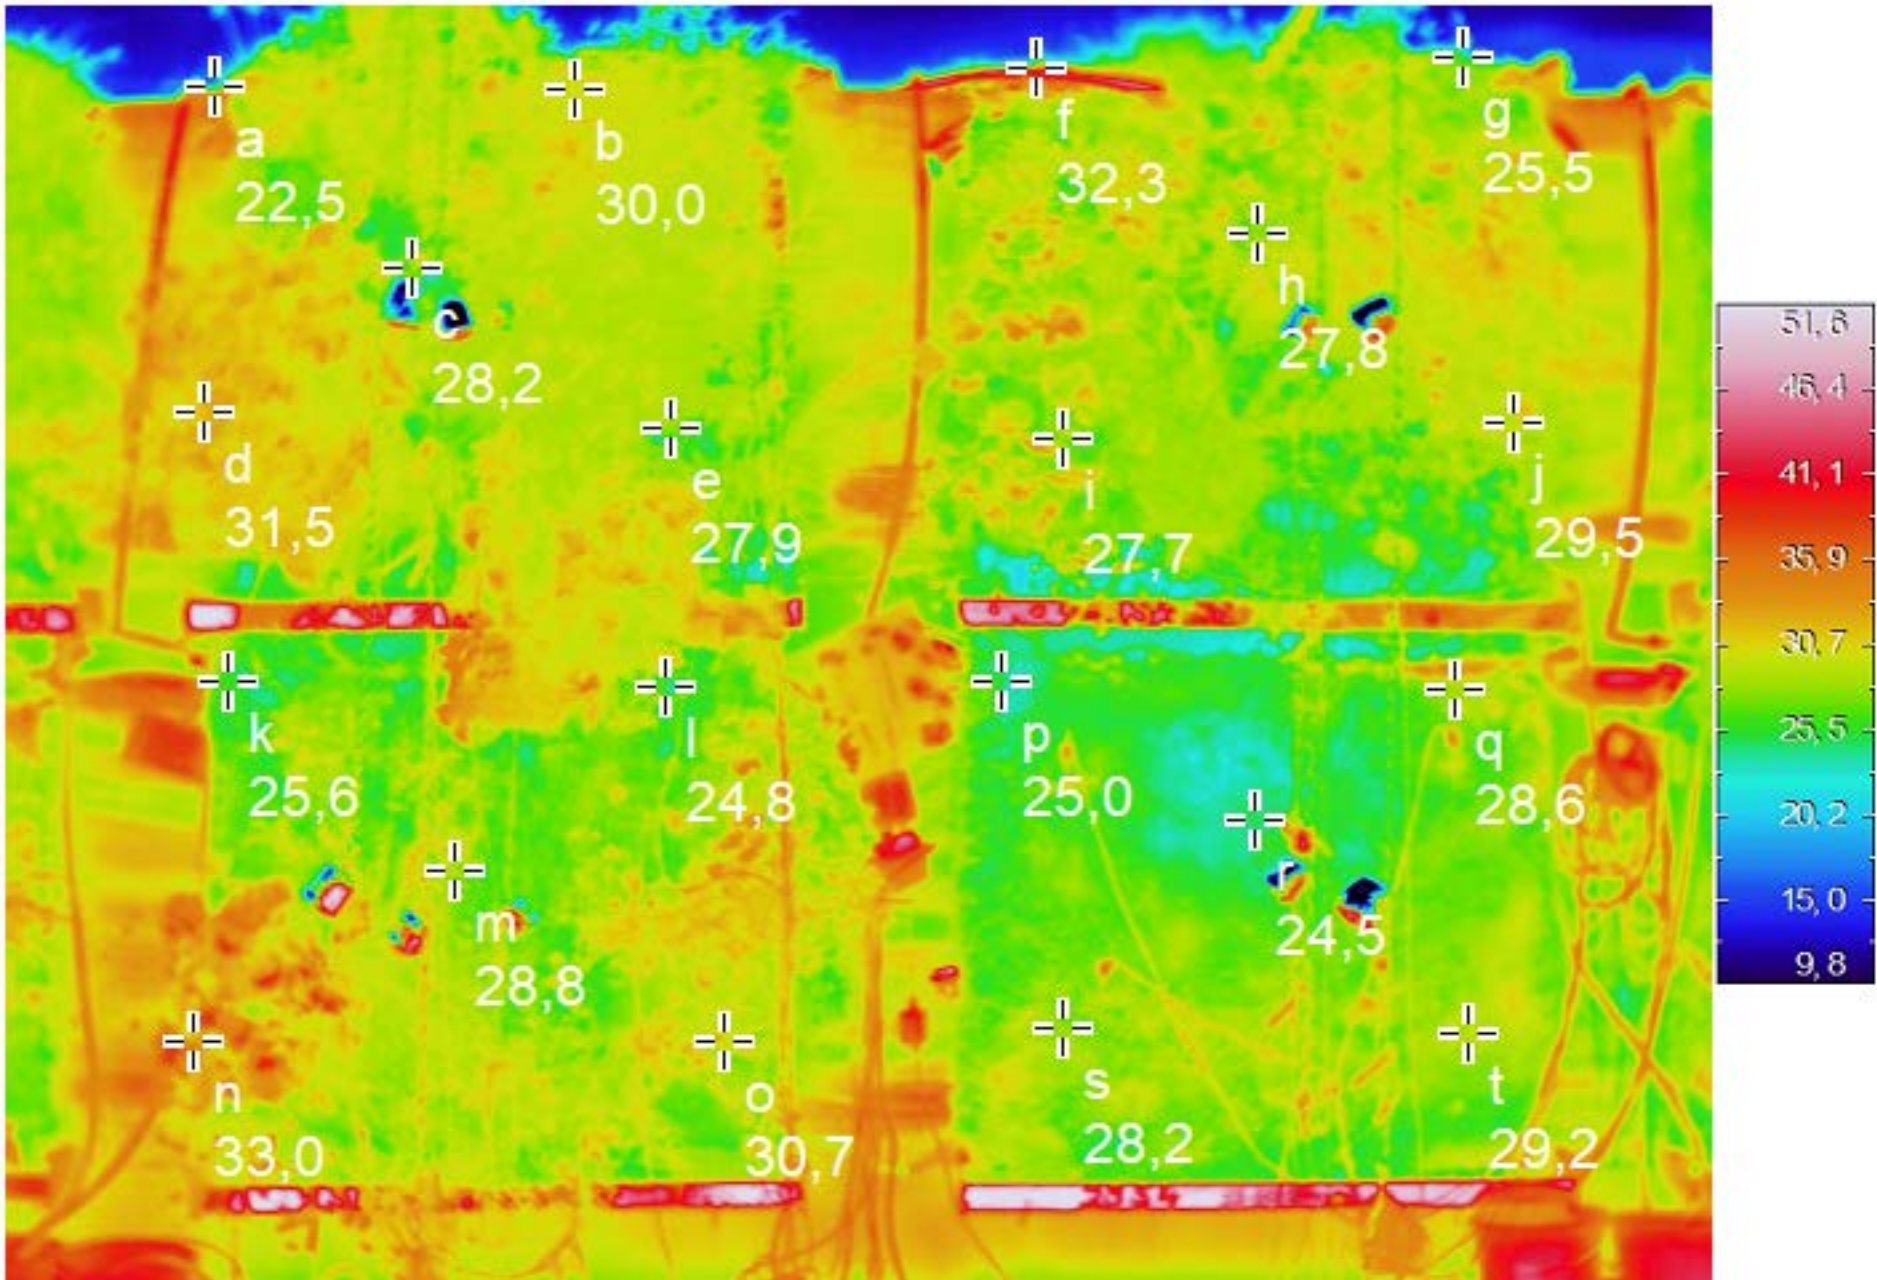

DateinameT02158IR.JPG  
Messtag:2019/06/19  
Messzeit:13:40:17  
Kommentar:  
Kameramodell:R500P  
Range:1[-20,0C-60,0C]  
BildmodusMEDx1,00  
Externes Objektiv:Standard  
Emissionsgrad:1.00  
Ambient Temp: 24,9IC  
IR Bildx1,00



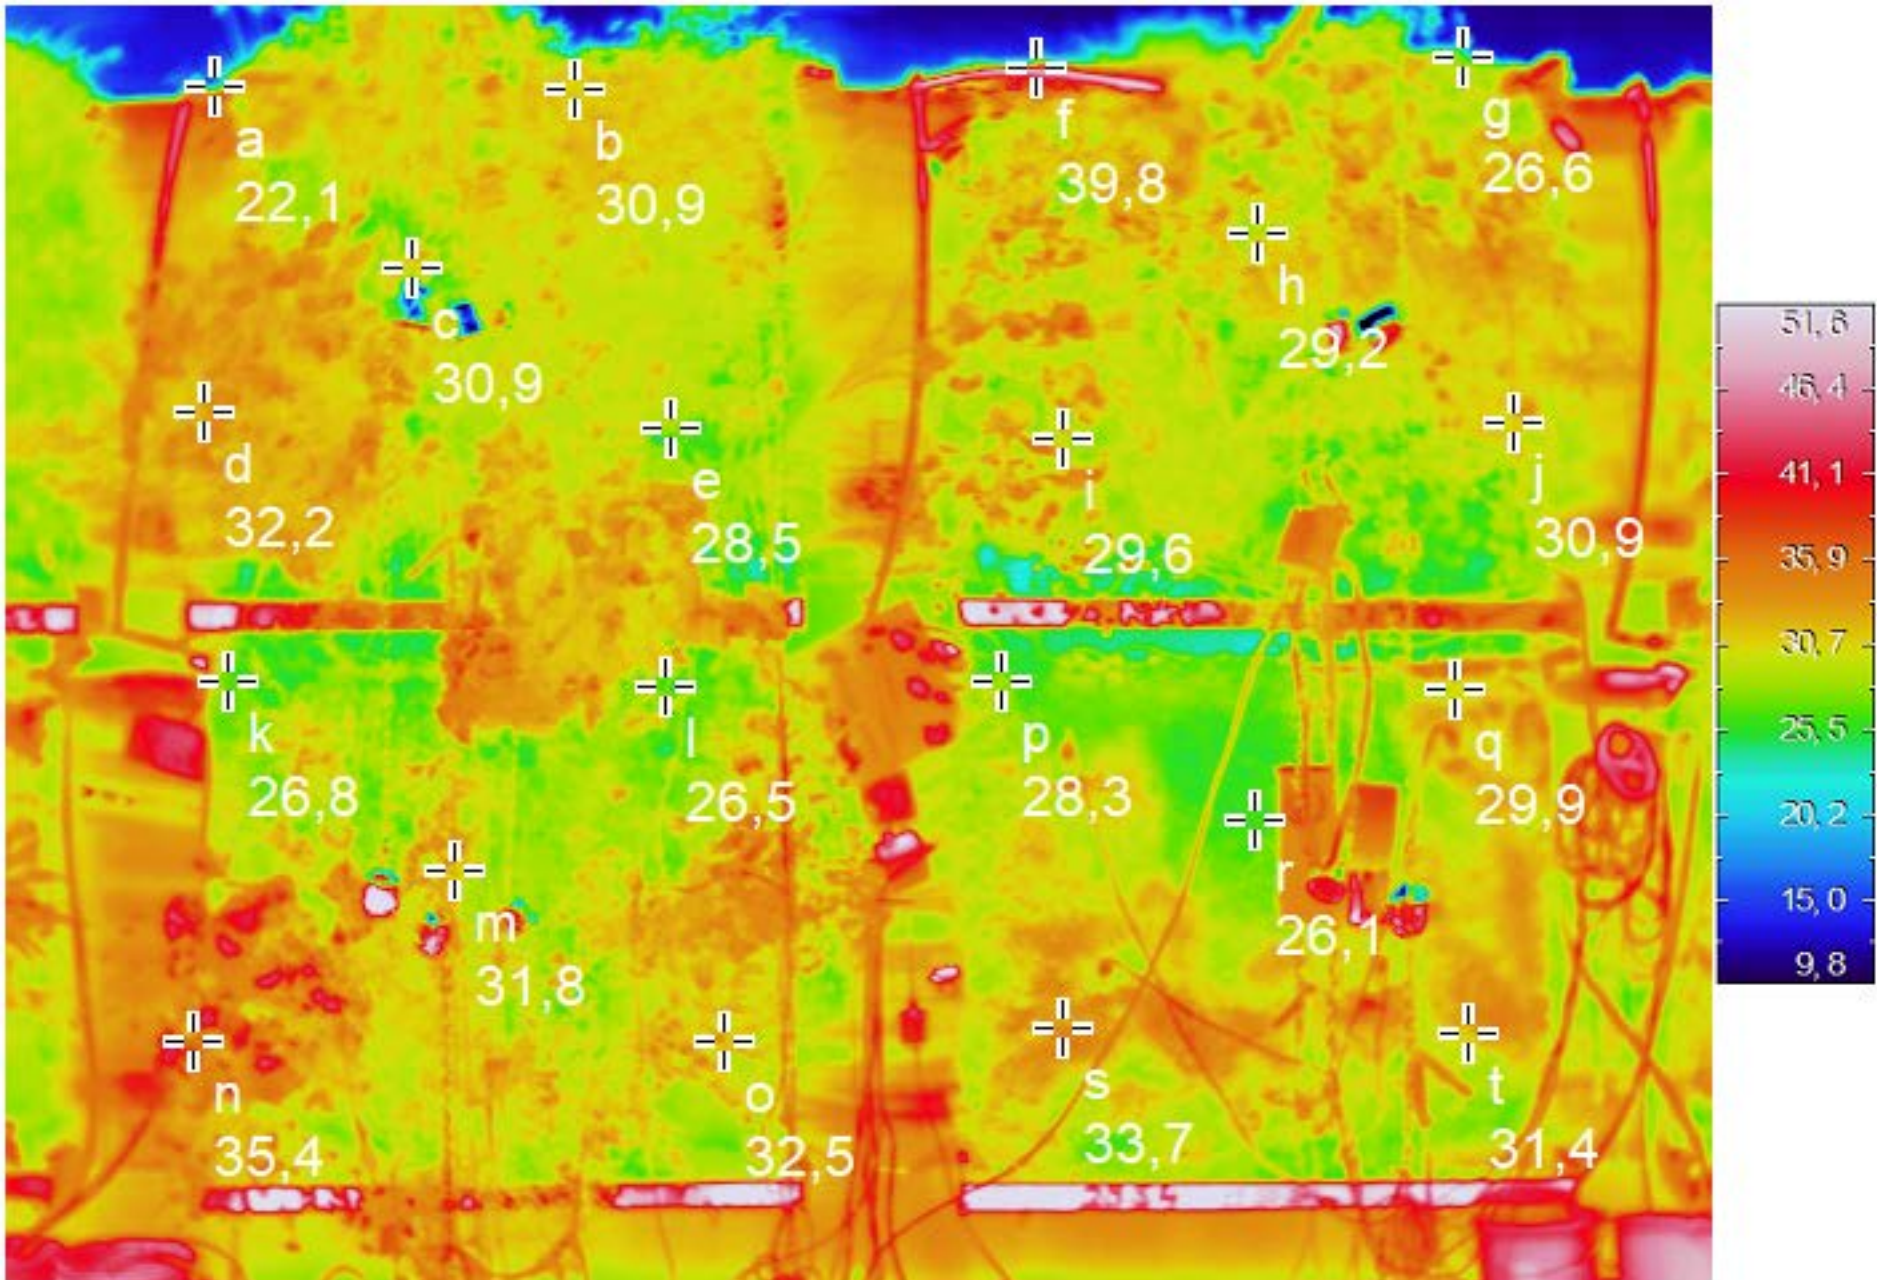

DateinameT02160IR.JPG  
Messtag:2019/06/19  
Messzeit:13:48:16  
Kommentar:  
Kameramodell:R500P  
Range:1[-20,0C-60,0C]  
BildmodusMEDx1,00  
Externes Objektiv:Standard  
Emissionsgrad:1.00  
Ambient Temp: 24,9IC  
IR Bildx1,00



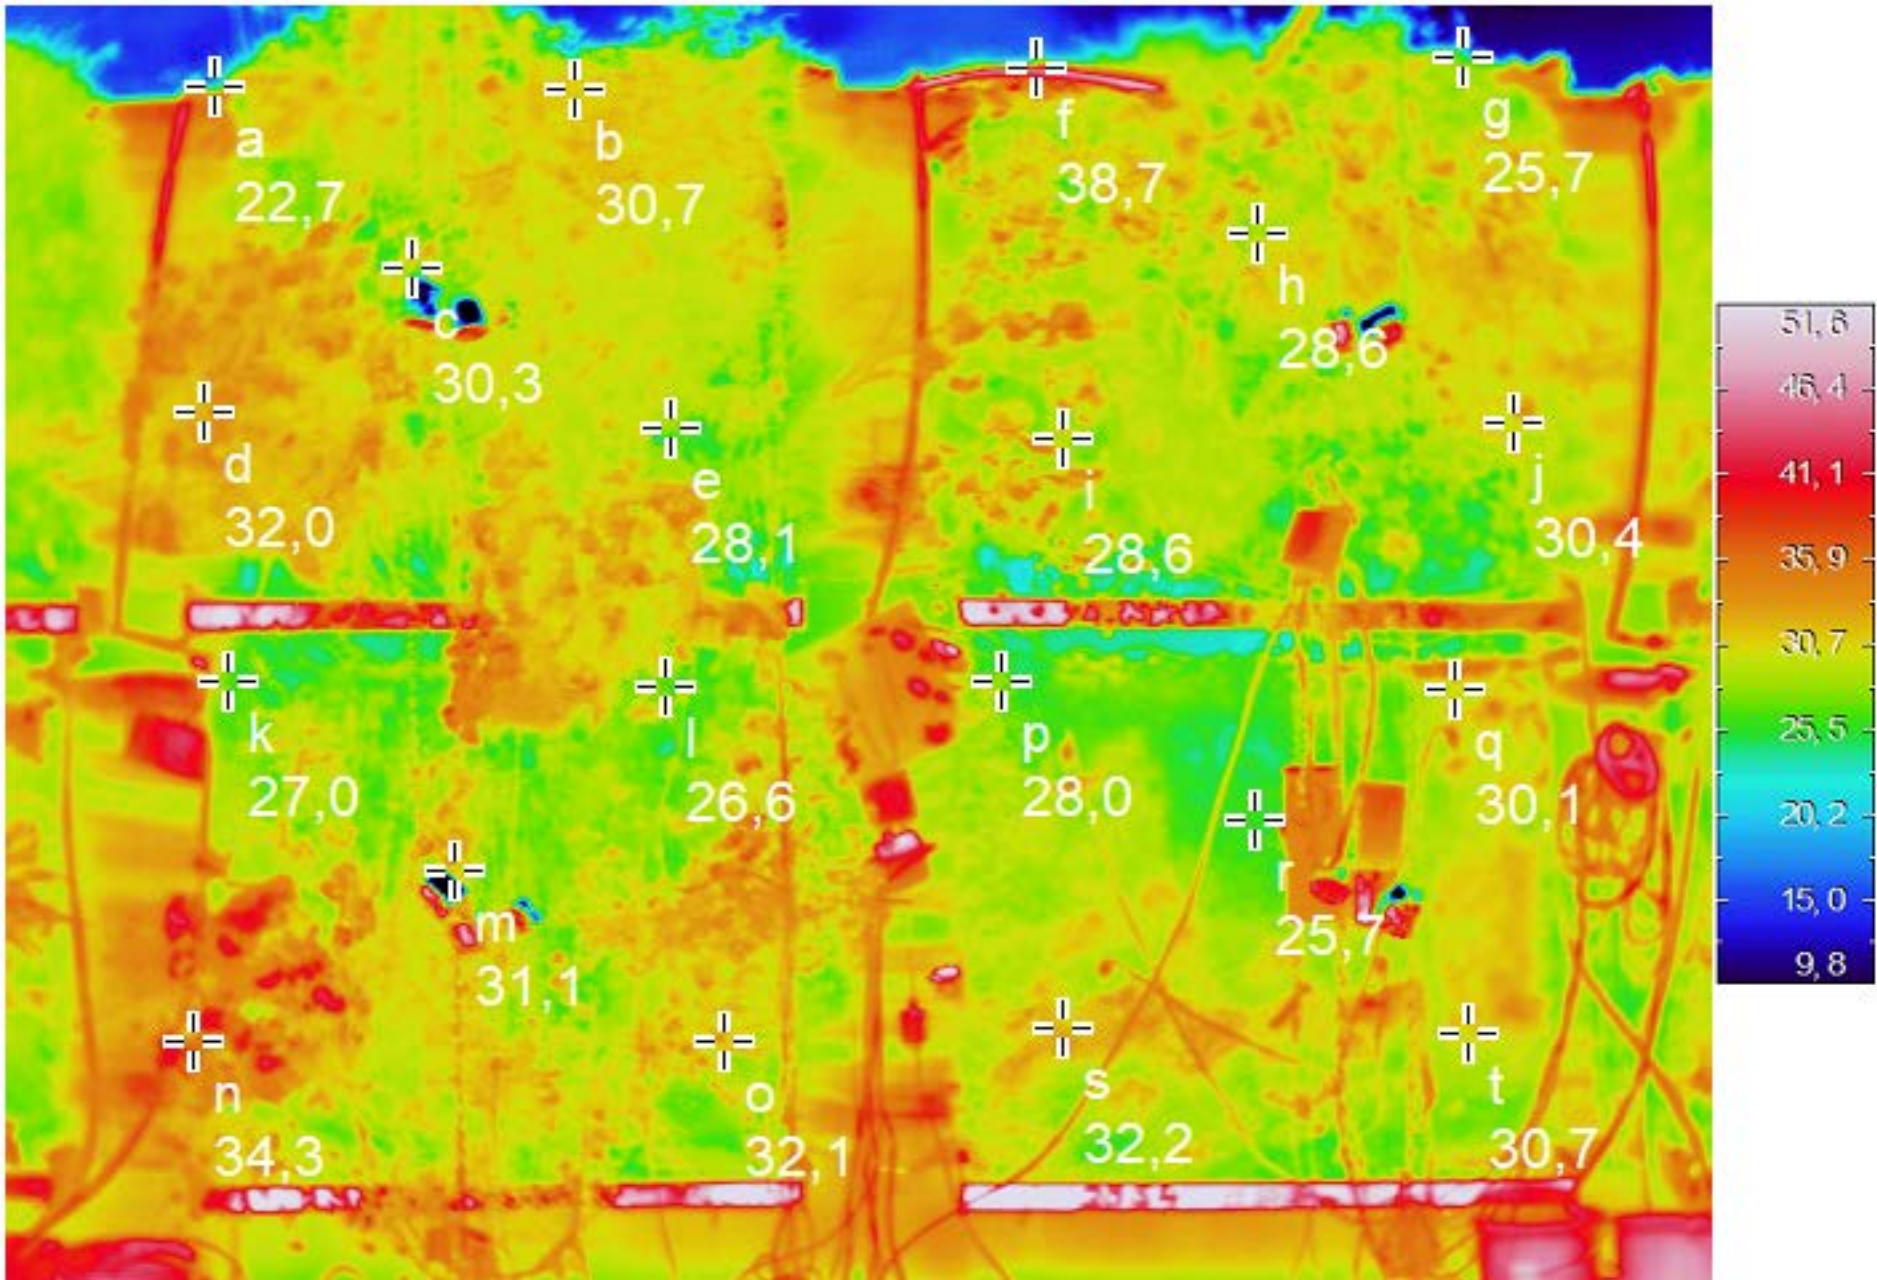

DateinameT02161IR.JPG  
Messtag:2019/06/19  
Messzeit:13:52:17  
Kommentar:  
Kameramodell:R500P  
Range:1[-20,0C-60,0C]  
BildmodusMEDx1,00  
Externes Objektiv:Standard  
Emissionsgrad:1.00  
Ambient Temp: 24,9IC  
IR Bildx1,00



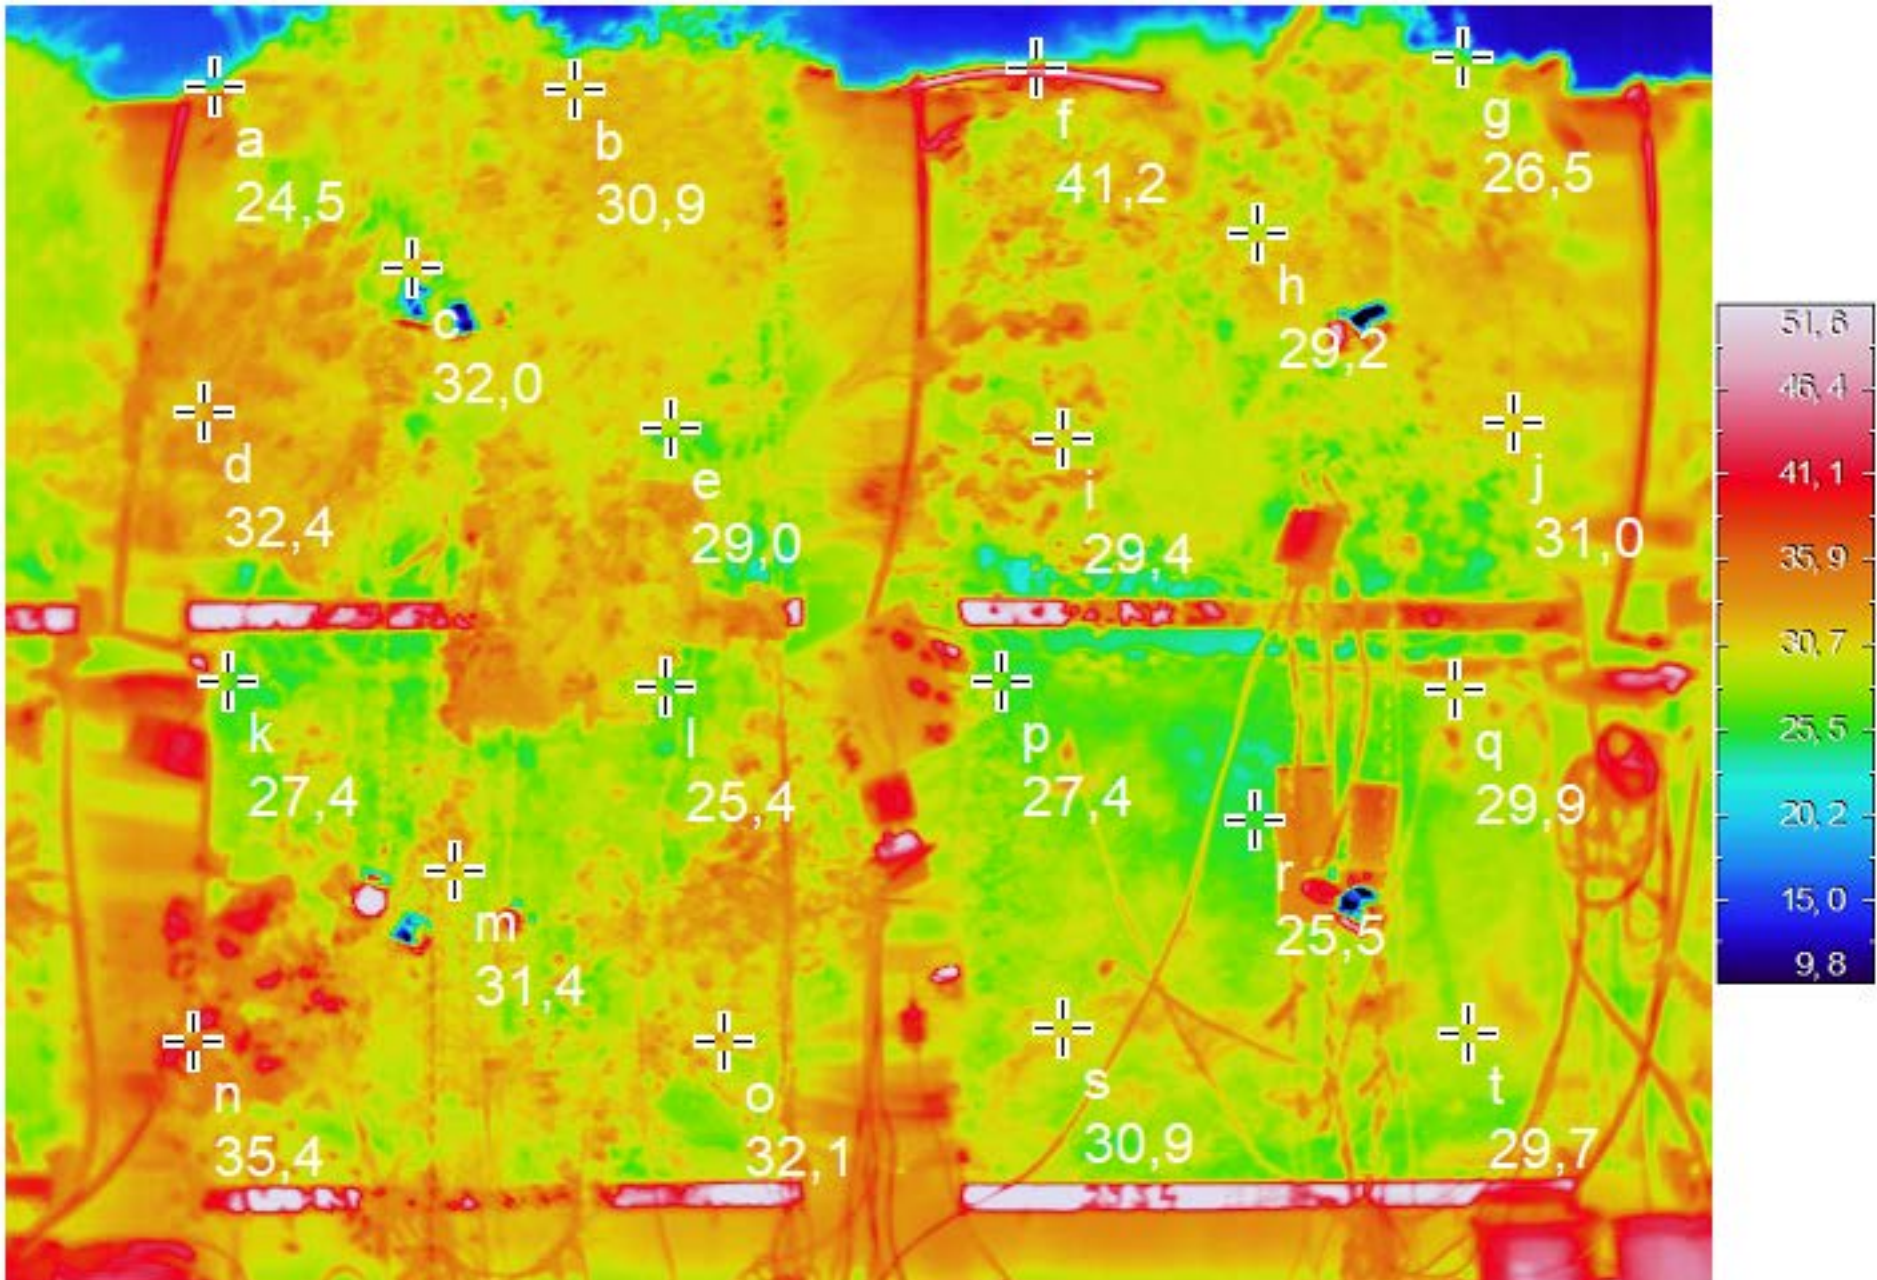

DateinameT02162IR.JPG  
Messtag:2019/06/19  
Messzeit:13:56:16  
Kommentar:  
Kameramodell:R500P  
Range:1[-20,0C-60,0C]  
BildmodusMEDx1,00  
Externes Objektiv:Standard  
Emissionsgrad:1.00  
Ambient Temp: 24,9IC  
IR Bildx1,00



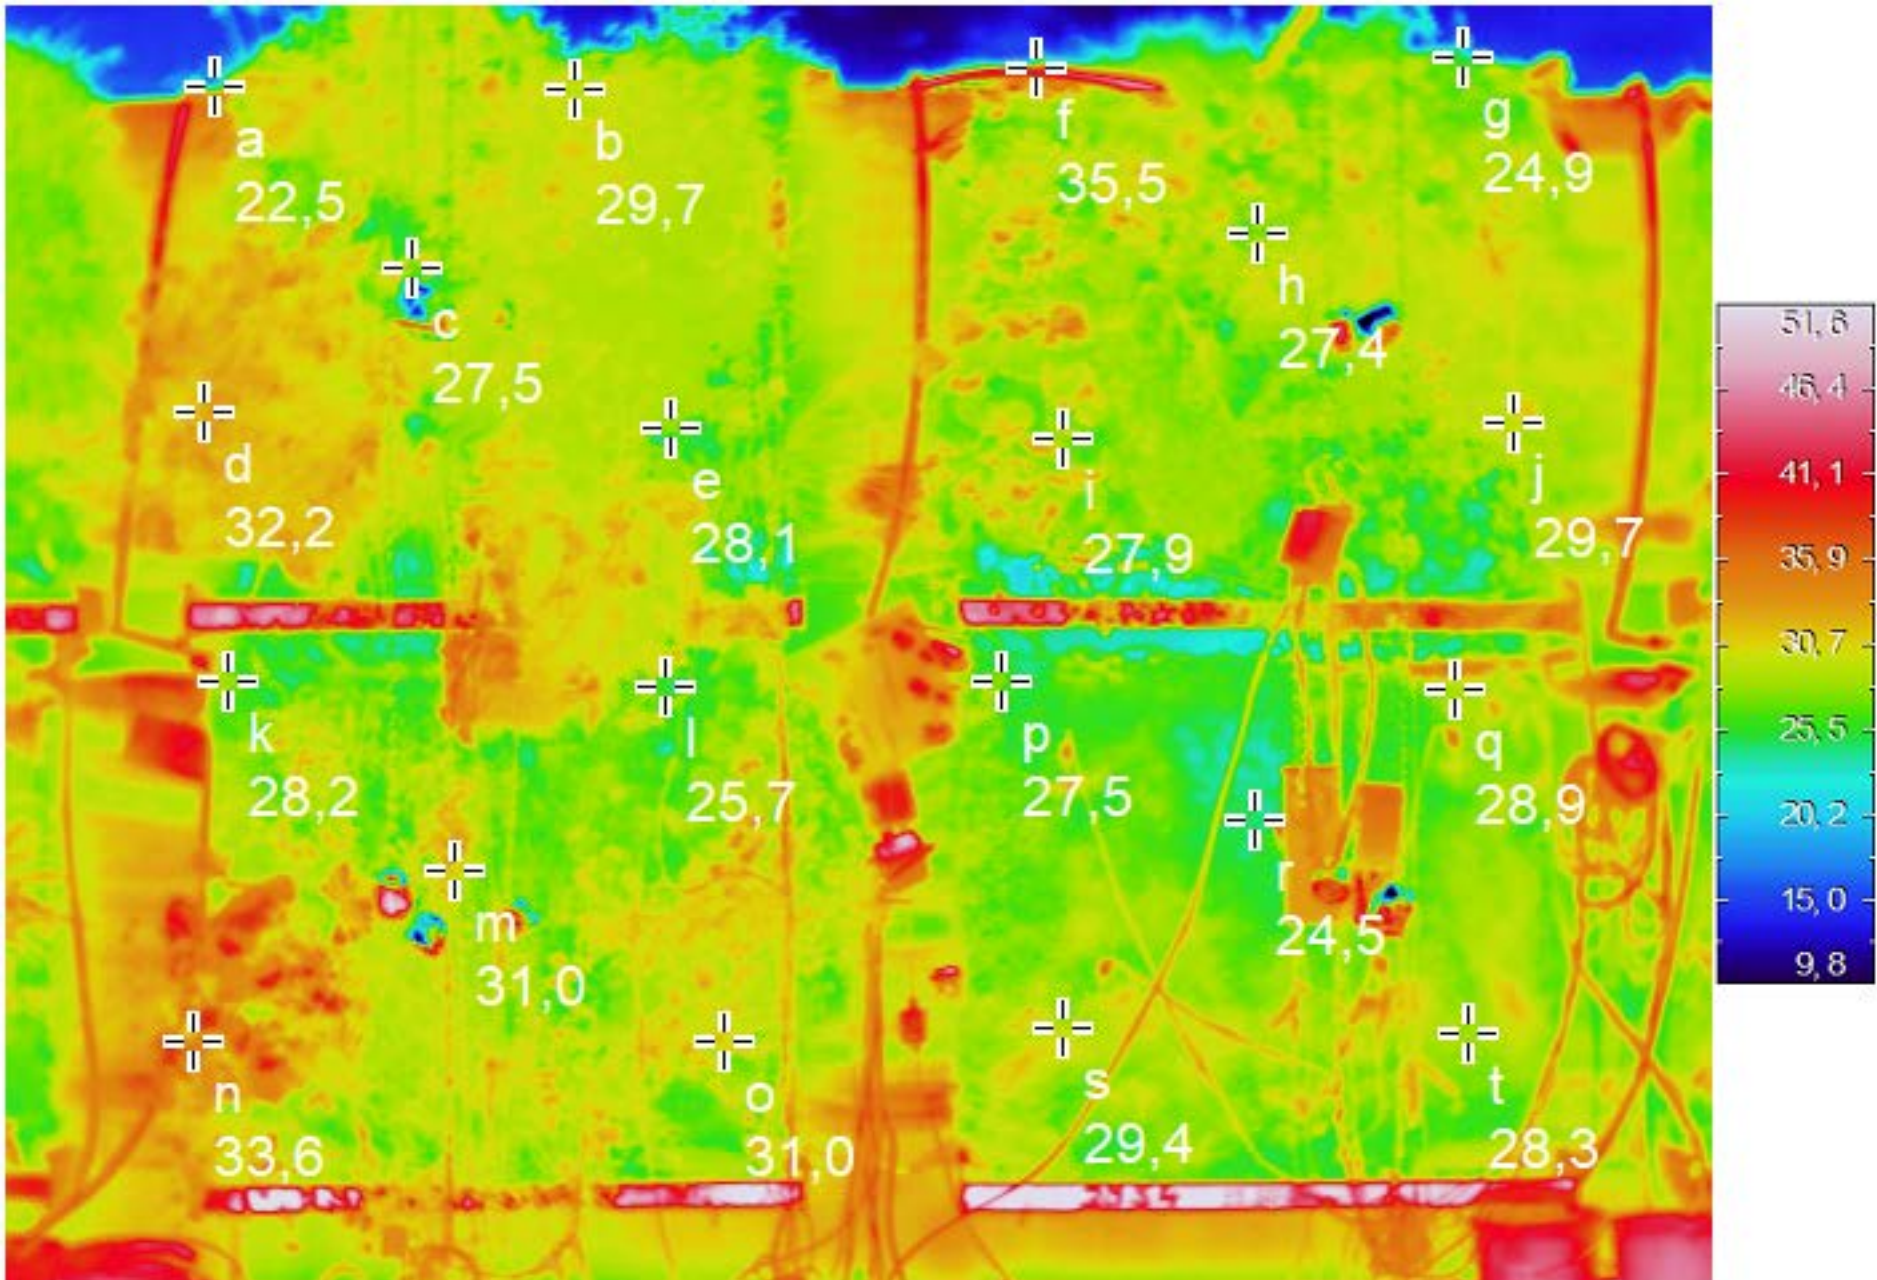

DateinameT02163IR.JPG  
Messtag:2019/06/19  
Messzeit:14:00:16  
Kommentar:  
Kameramodell:R500P  
Range:1[-20,0C-60,0C]  
BildmodusMEDx1,00  
Externes Objektiv:Standard  
Emissionsgrad:1.00  
Ambient Temp: 24,9IC  
IR Bildx1,00



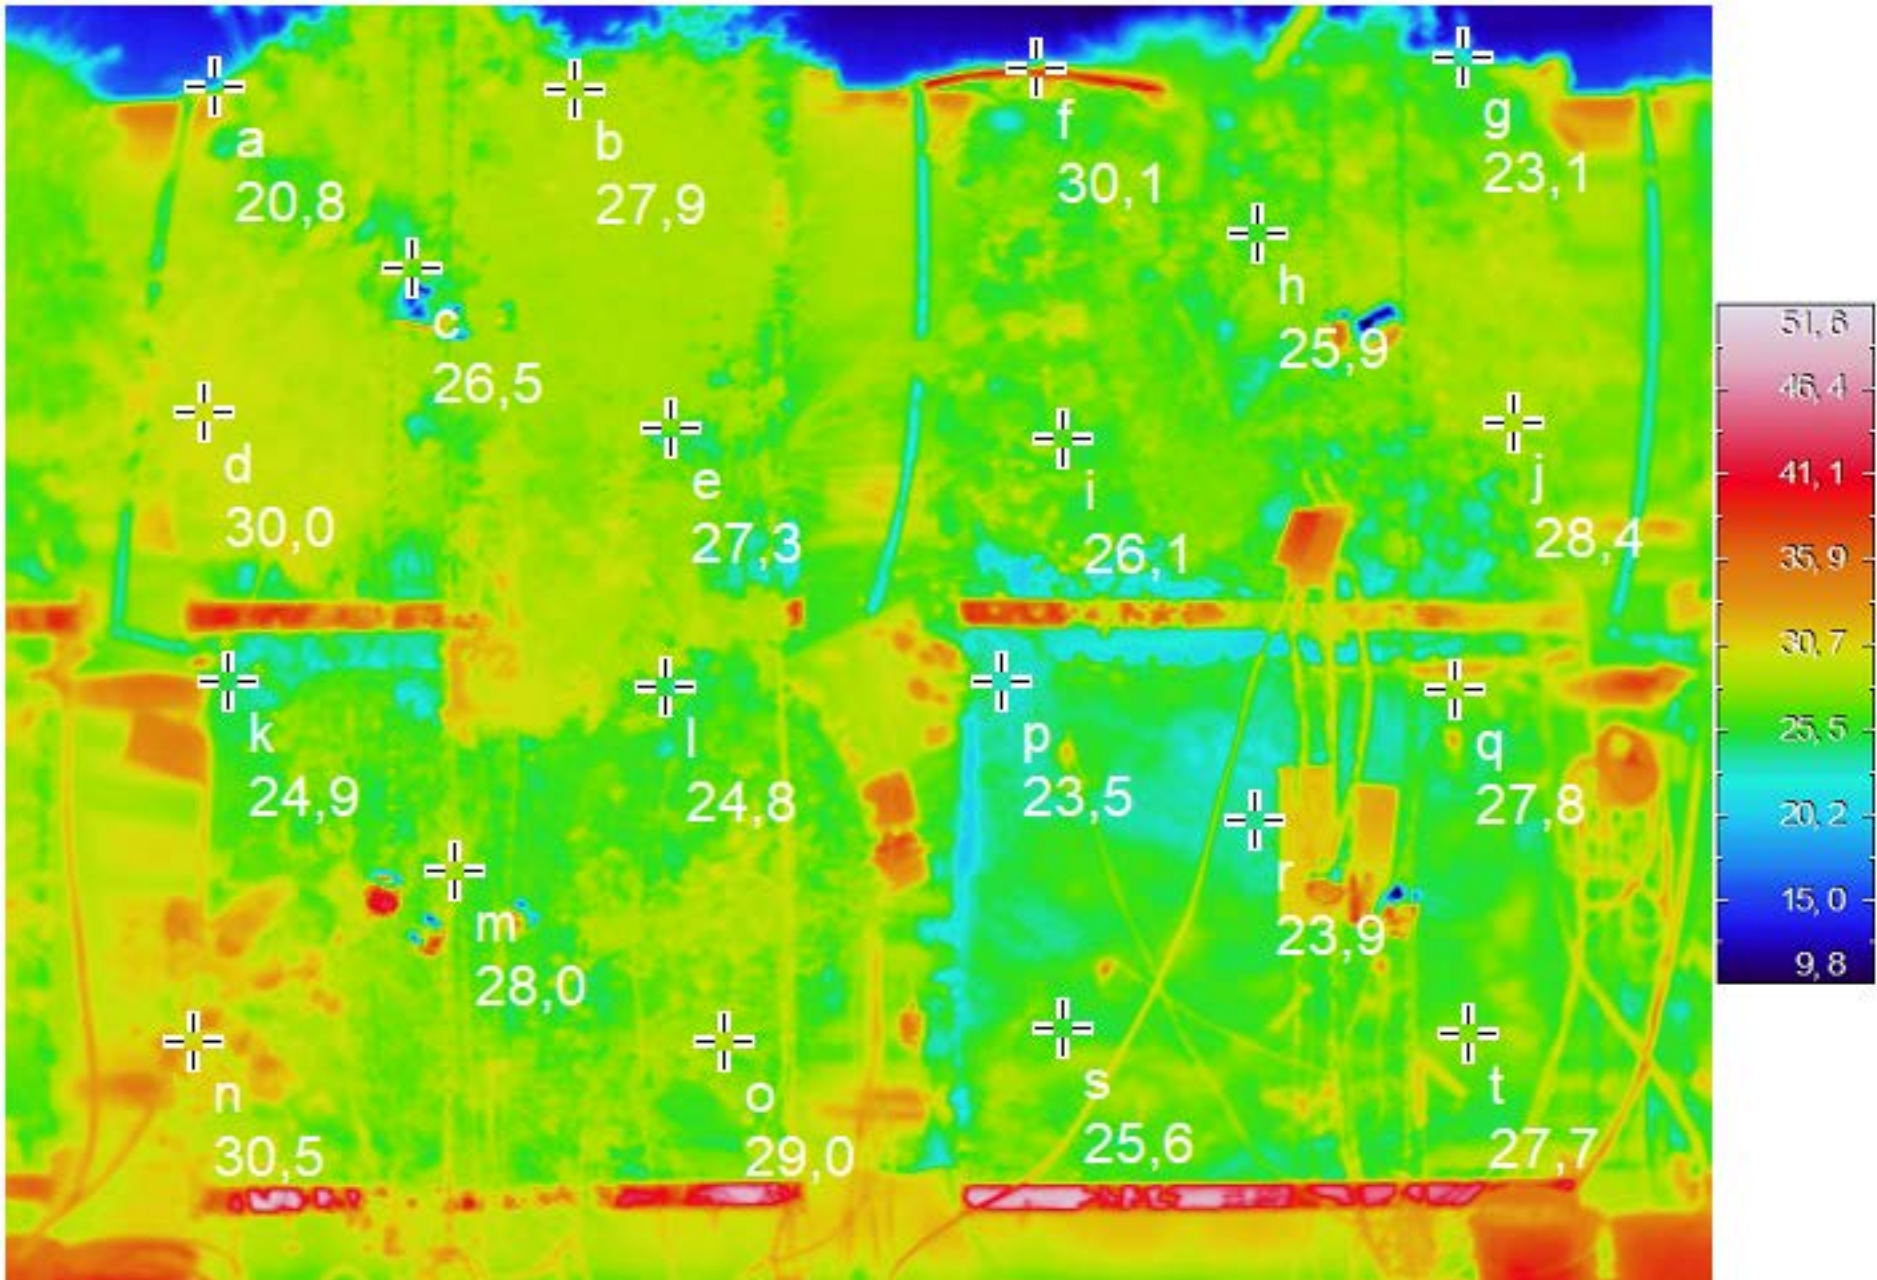

DateinameT02164IR.JPG  
Messtag:2019/06/19  
Messzeit:14:04:16  
Kommentar:  
Kameramodell:R500P  
Range:1[-20,0C-60,0C]  
BildmodusMEDx1,00  
Externes Objektiv:Standard  
Emissionsgrad:1.00  
Ambient Temp: 24,9IC  
IR Bildx1,00



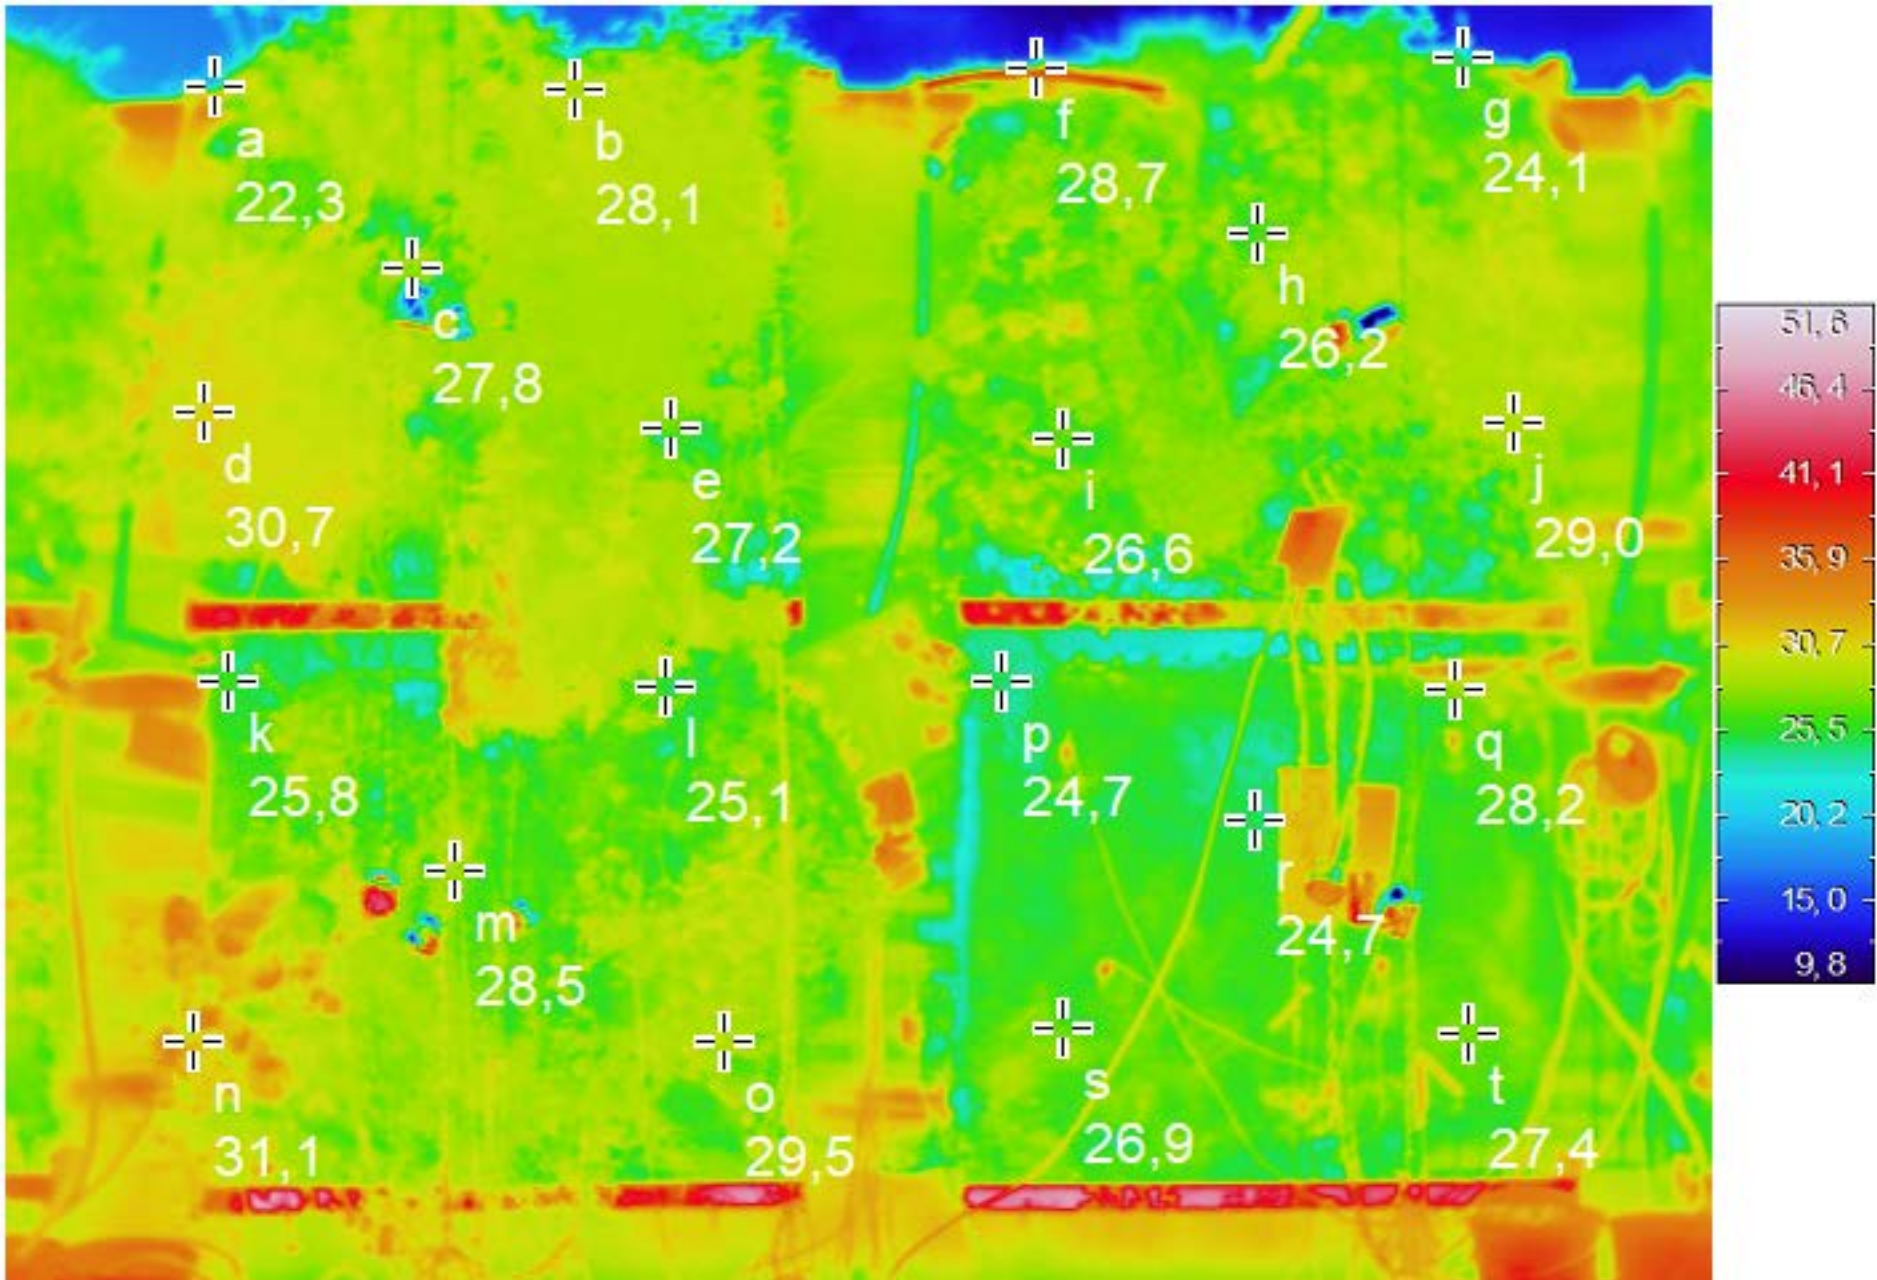

DateinameT02165IR.JPG  
Messtag:2019/06/19  
Messzeit:14:08:16  
Kommentar:  
Kameramodell:R500P  
Range:1[-20,0C-60,0C]  
BildmodusMEDx1,00  
Externes Objektiv:Standard  
Emissionsgrad:1.00  
Ambient Temp: 24,9IC  
IR Bildx1,00



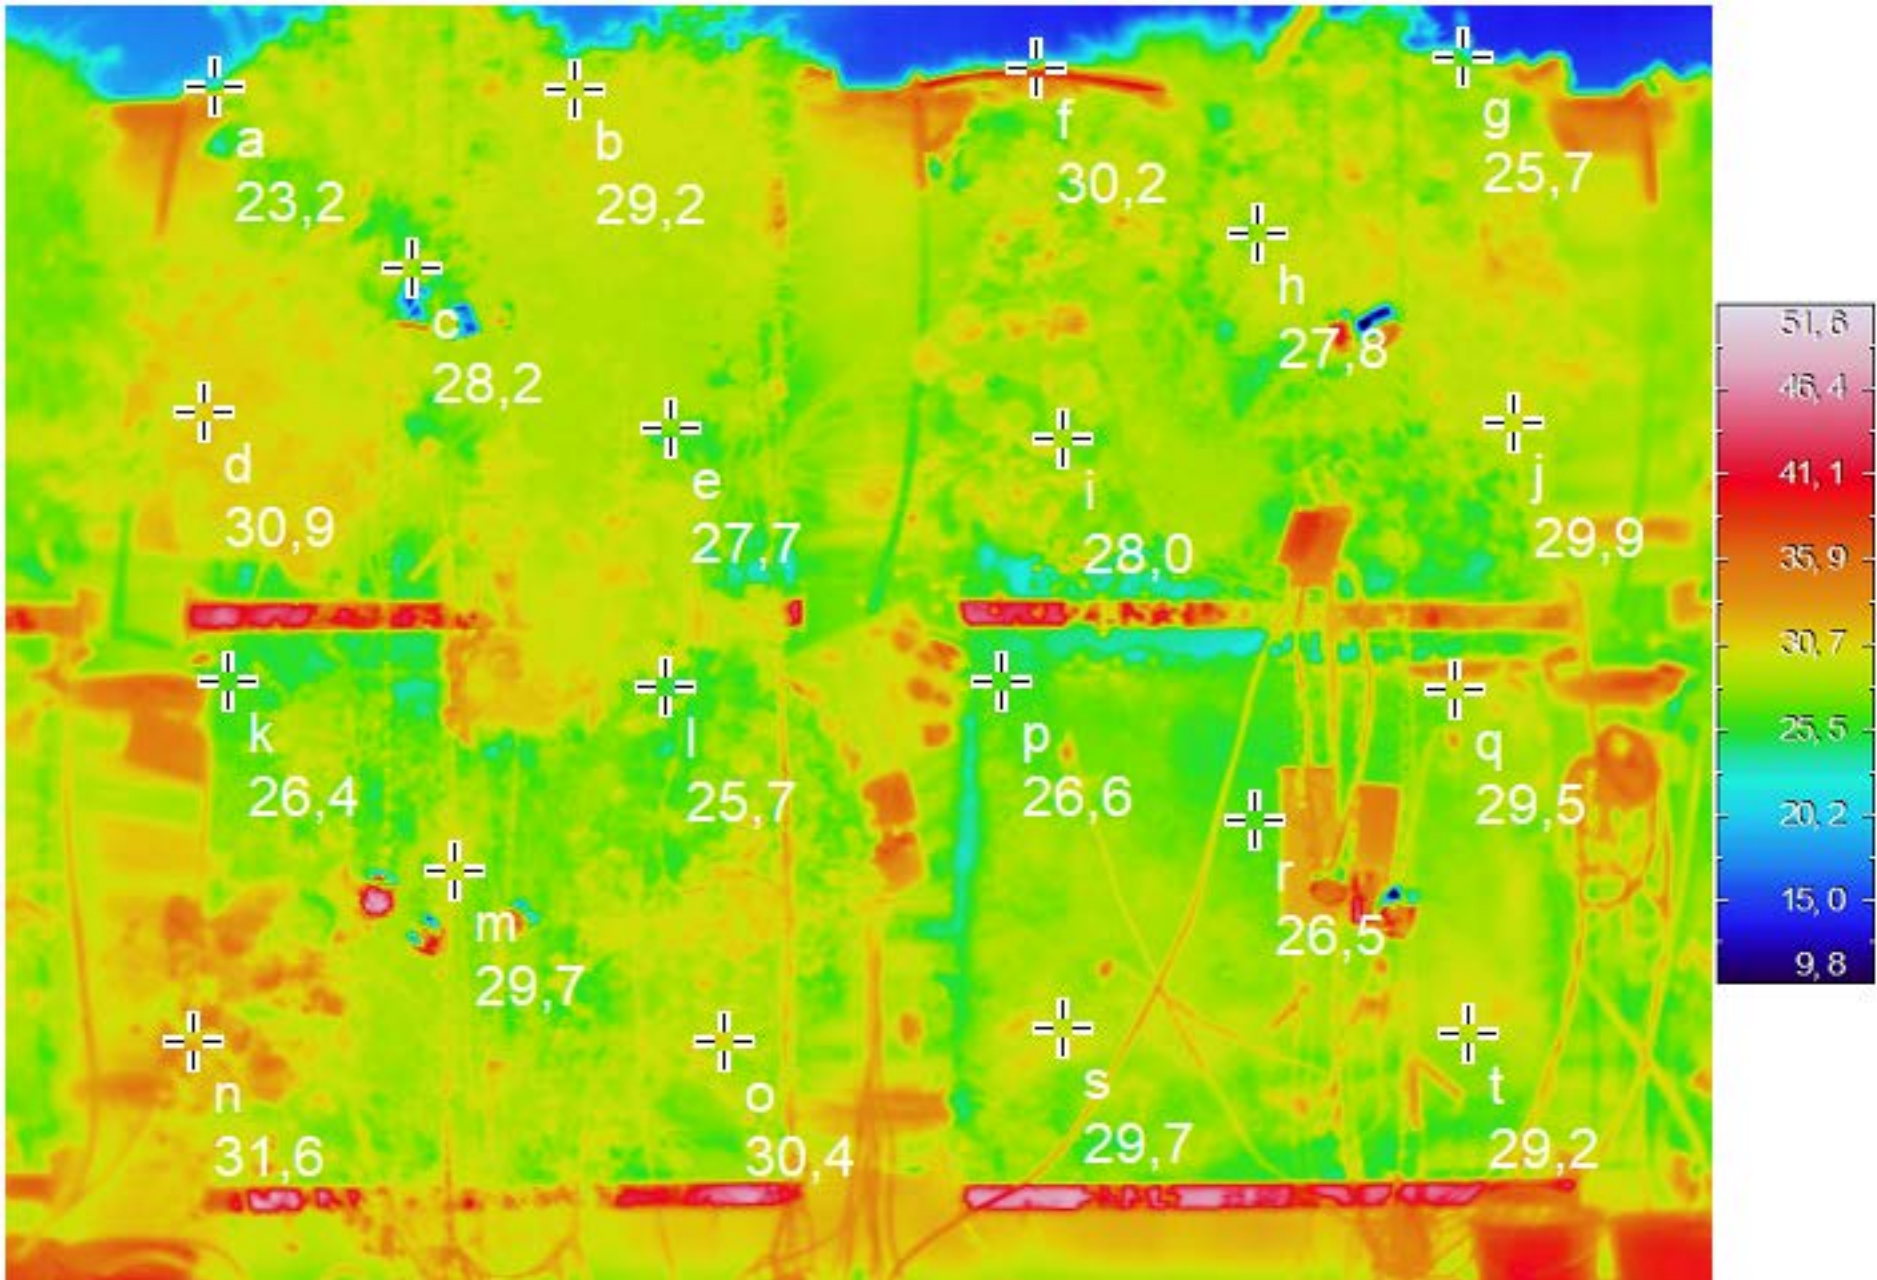

DateinameT02166IR.JPG  
Messtag:2019/06/19  
Messzeit:14:12:16  
Kommentar:  
Kameramodell:R500P  
Range:1[-20,0C-60,0C]  
BildmodusMEDx1,00  
Externes Objektiv:Standard  
Emissionsgrad:1.00  
Ambient Temp: 24,9IC  
IR Bildx1,00



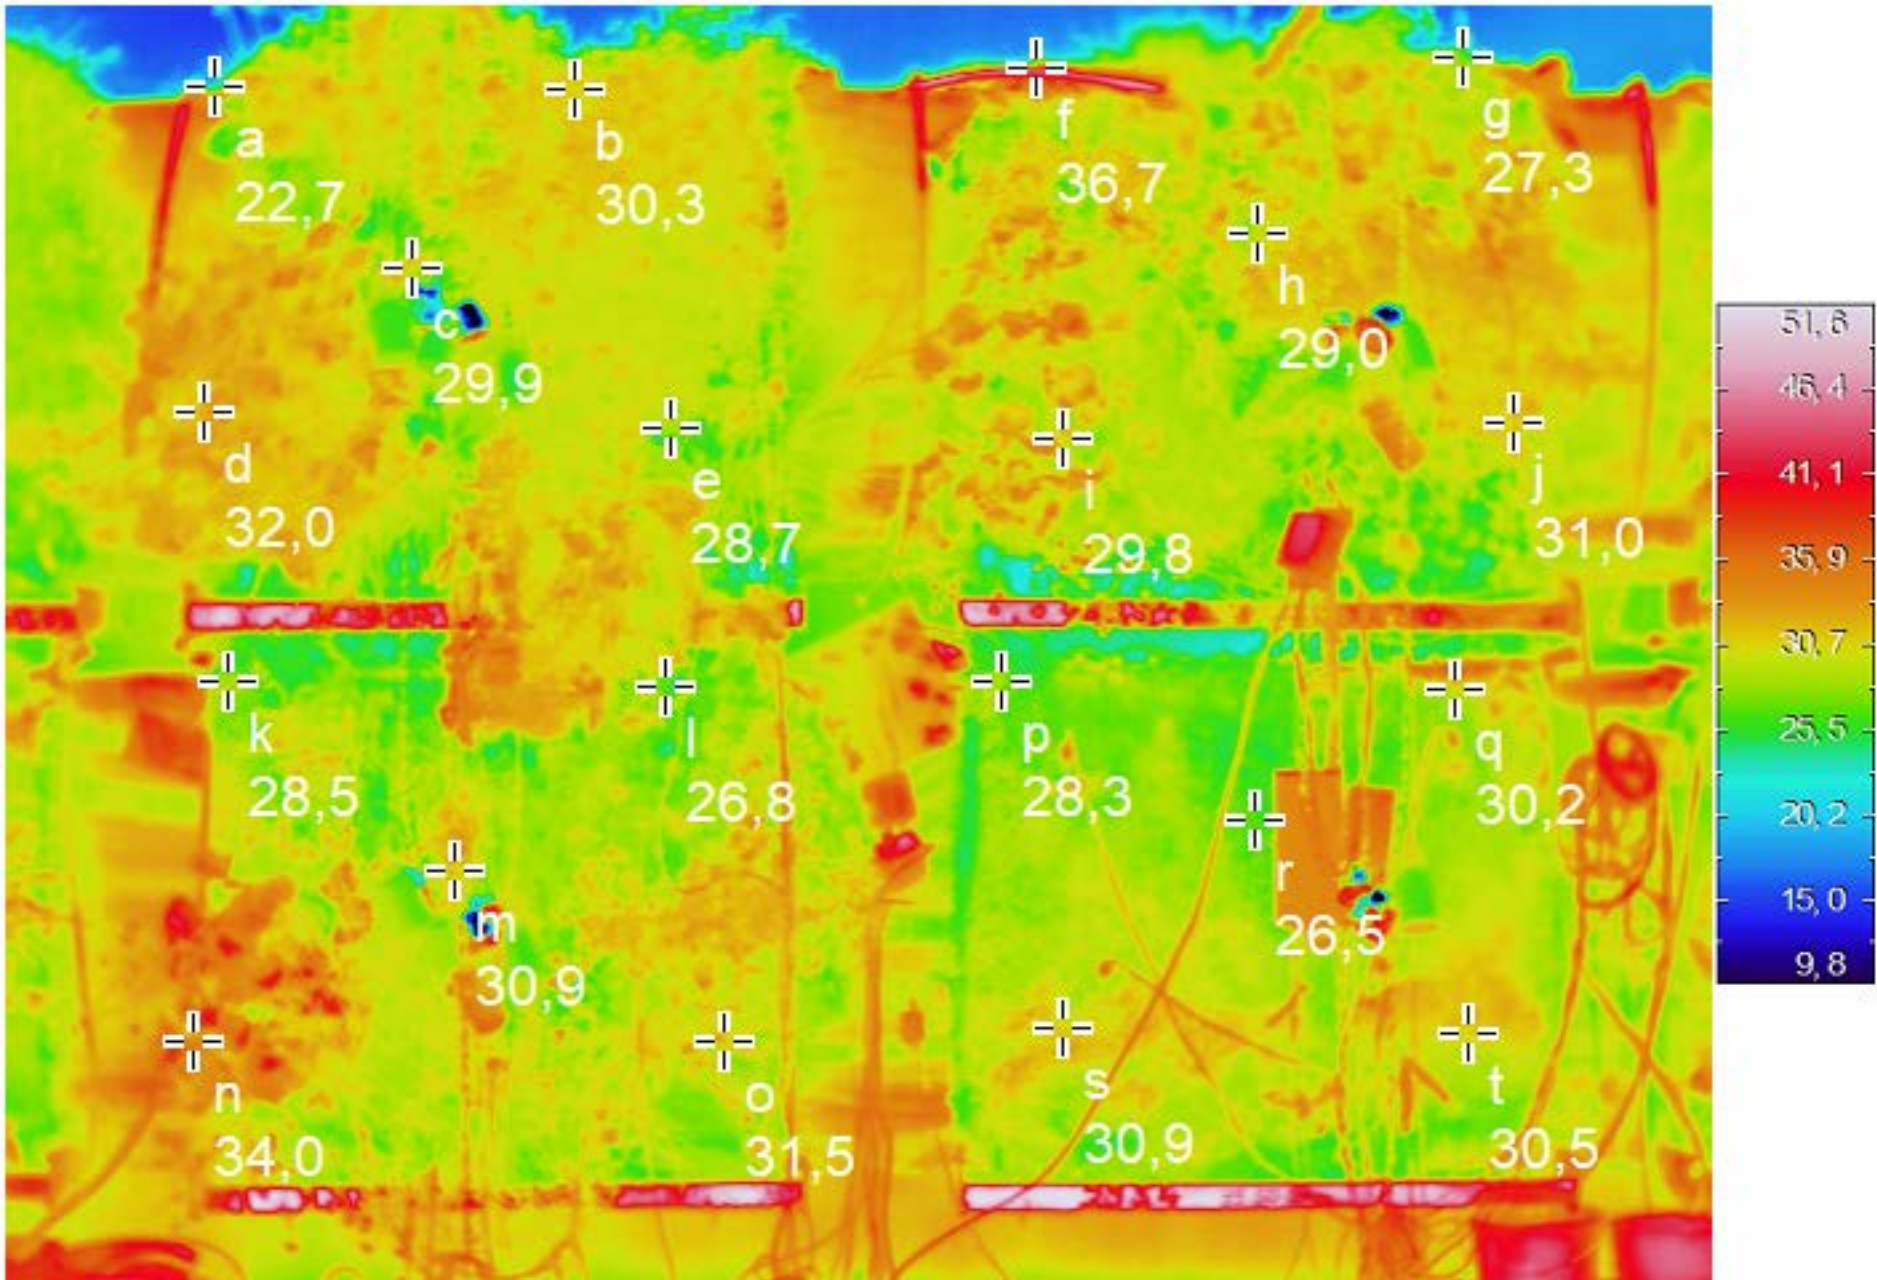

DateinameT02168IR.JPG  
Messtag:2019/06/19  
Messzeit:14:20:16  
Kommentar:  
Kameramodell:R500P  
Range:1[-20,0C-60,0C]  
BildmodusMEDx1,00  
Externes Objektiv:Standard  
Emissionsgrad:1.00  
Ambient Temp: 24,9IC  
IR Bildx1,00



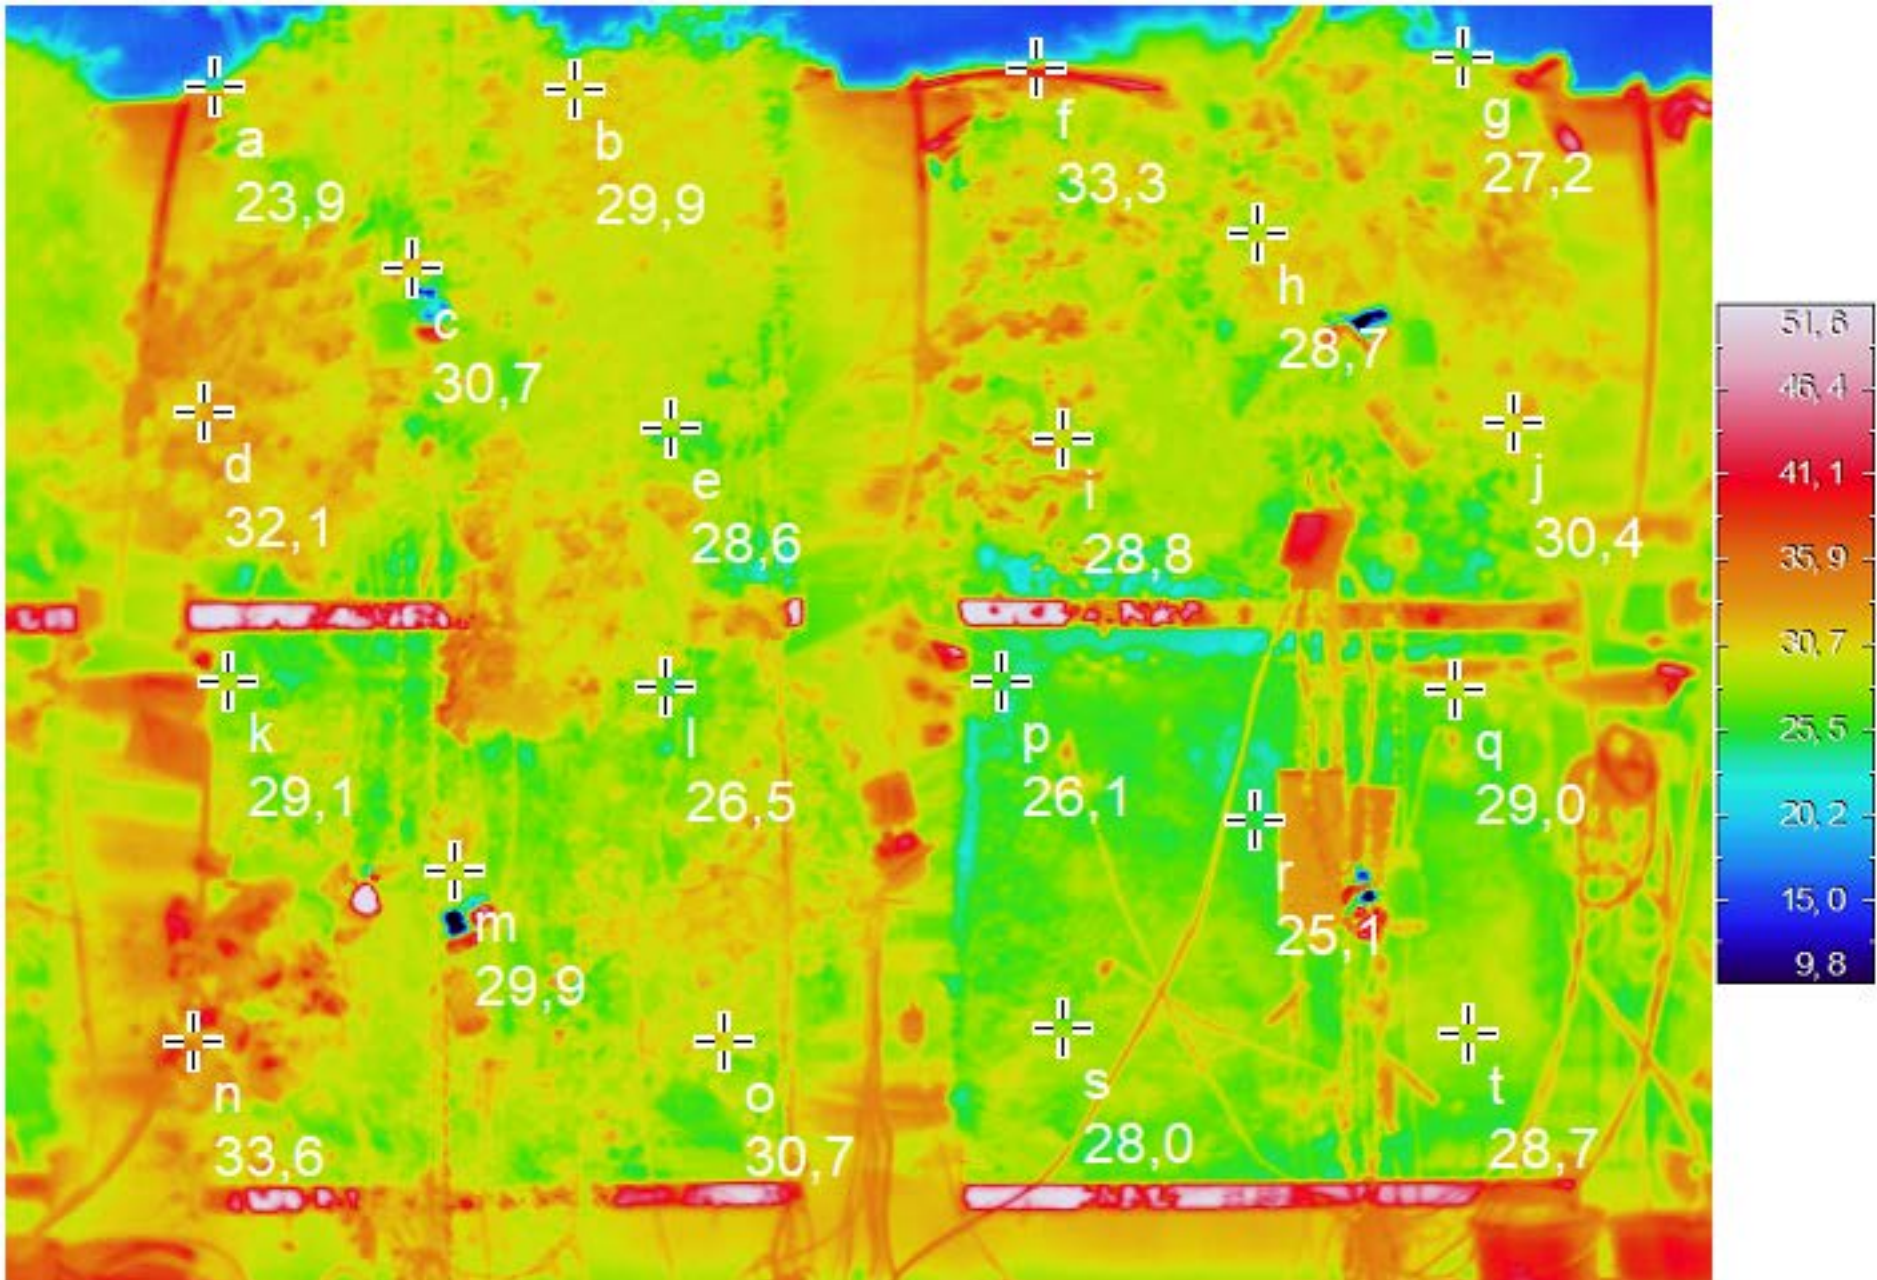

DateinameT02169IR.JPG  
Messtag:2019/06/19  
Messzeit:14:24:16  
Kommentar:  
Kameramodell:R500P  
Range:1[-20,0C-60,0C]  
BildmodusMEDx1,00  
Externes Objektiv:Standard  
Emissionsgrad:1.00  
Ambient Temp: 24,9IC  
IR Bildx1,00



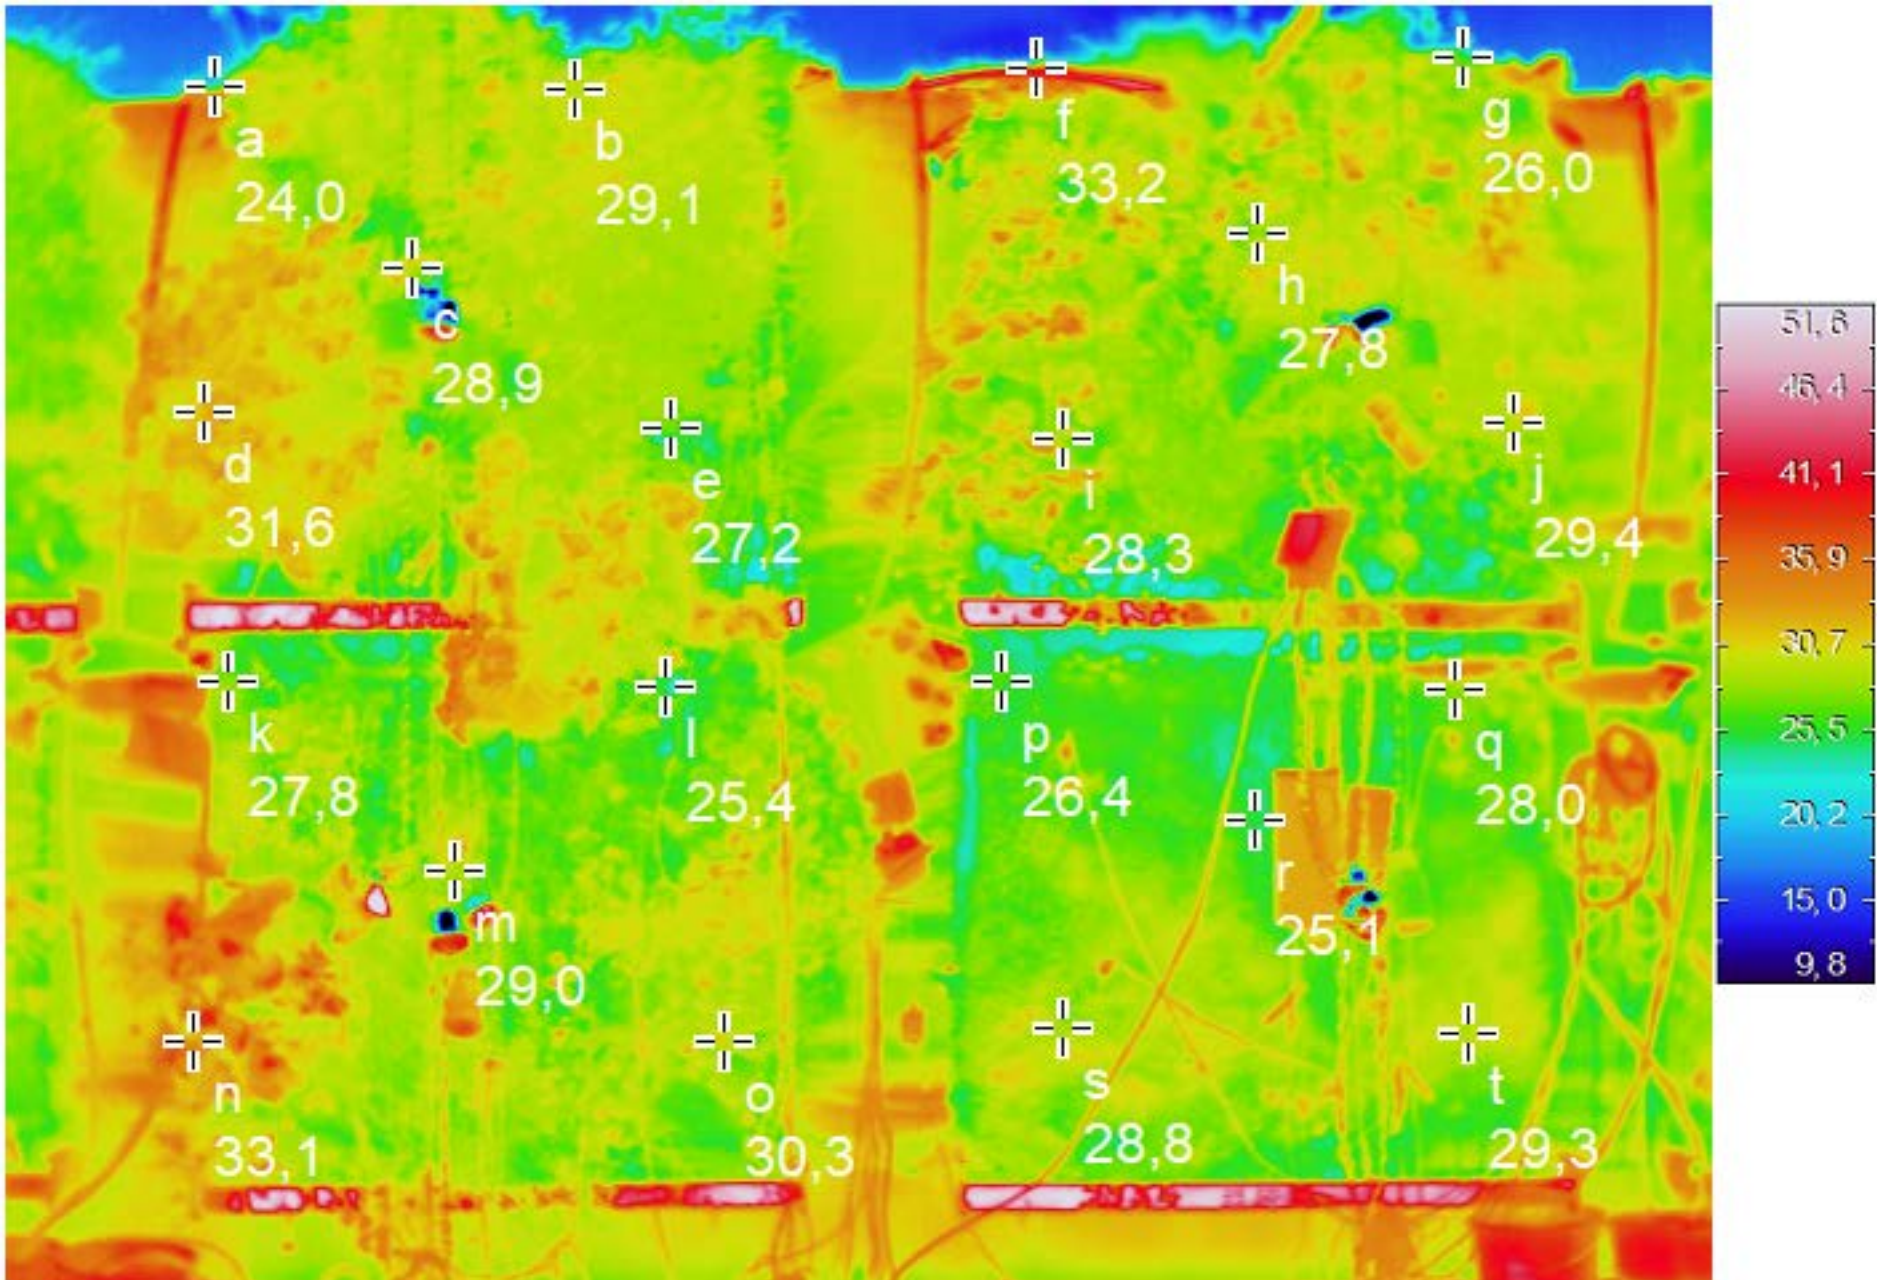

DateinameT02170IR.JPG  
Messtag:2019/06/19  
Messzeit:14:28:16  
Kommentar:  
Kameramodell:R500P  
Range:1[-20,0C-60,0C]  
BildmodusMEDx1,00  
Externes Objektiv:Standard  
Emissionsgrad:1.00  
Ambient Temp: 24,9IC  
IR Bildx1,00



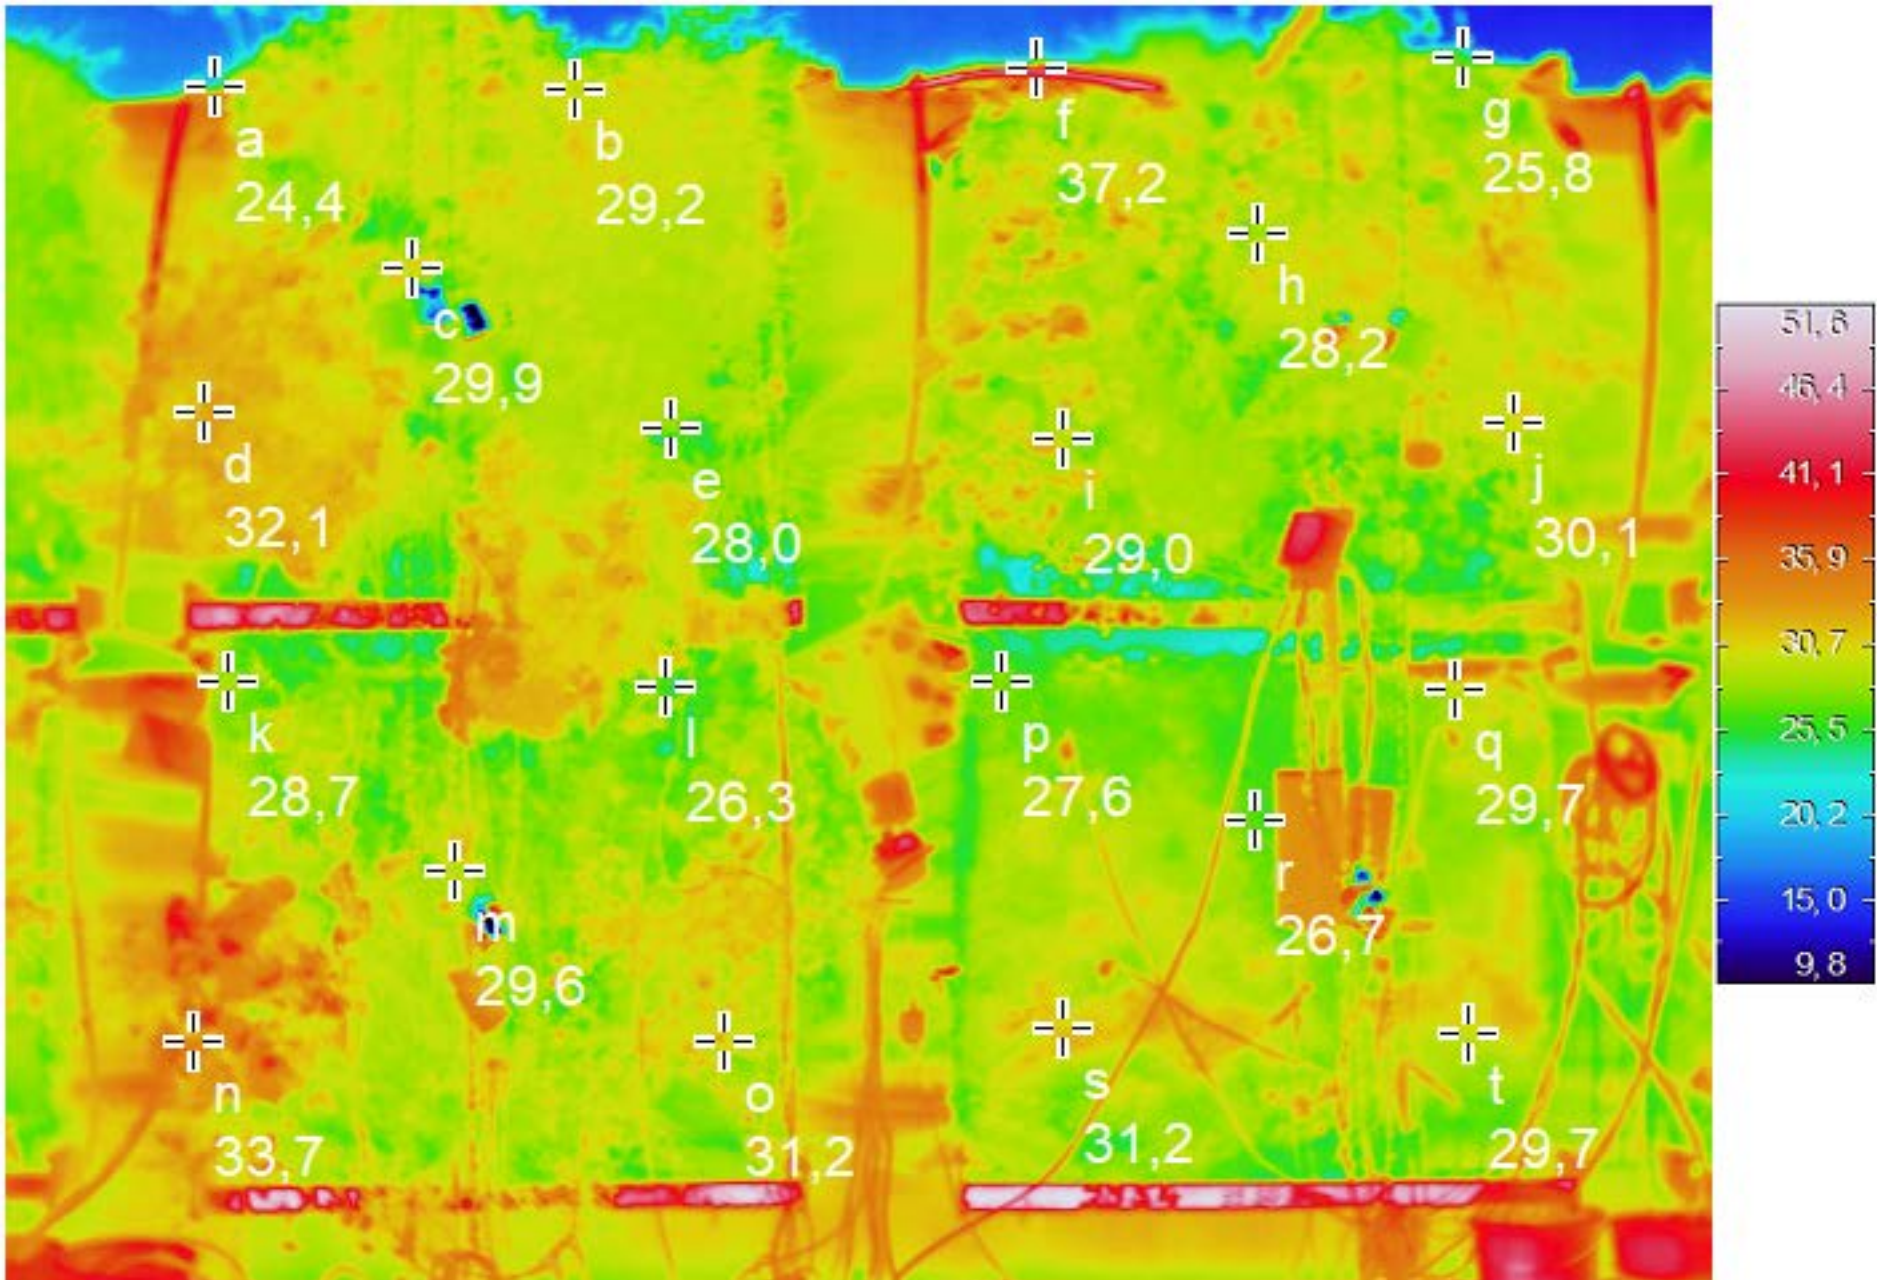

DateinameT02171IR.JPG  
Messtag:2019/06/19  
Messzeit:14:32:16  
Kommentar:  
Kameramodell:R500P  
Range:1[-20,0C-60,0C]  
BildmodusMEDx1,00  
Externes Objektiv:Standard  
Emissionsgrad:1.00  
Ambient Temp: 24,9IC  
IR Bildx1,00



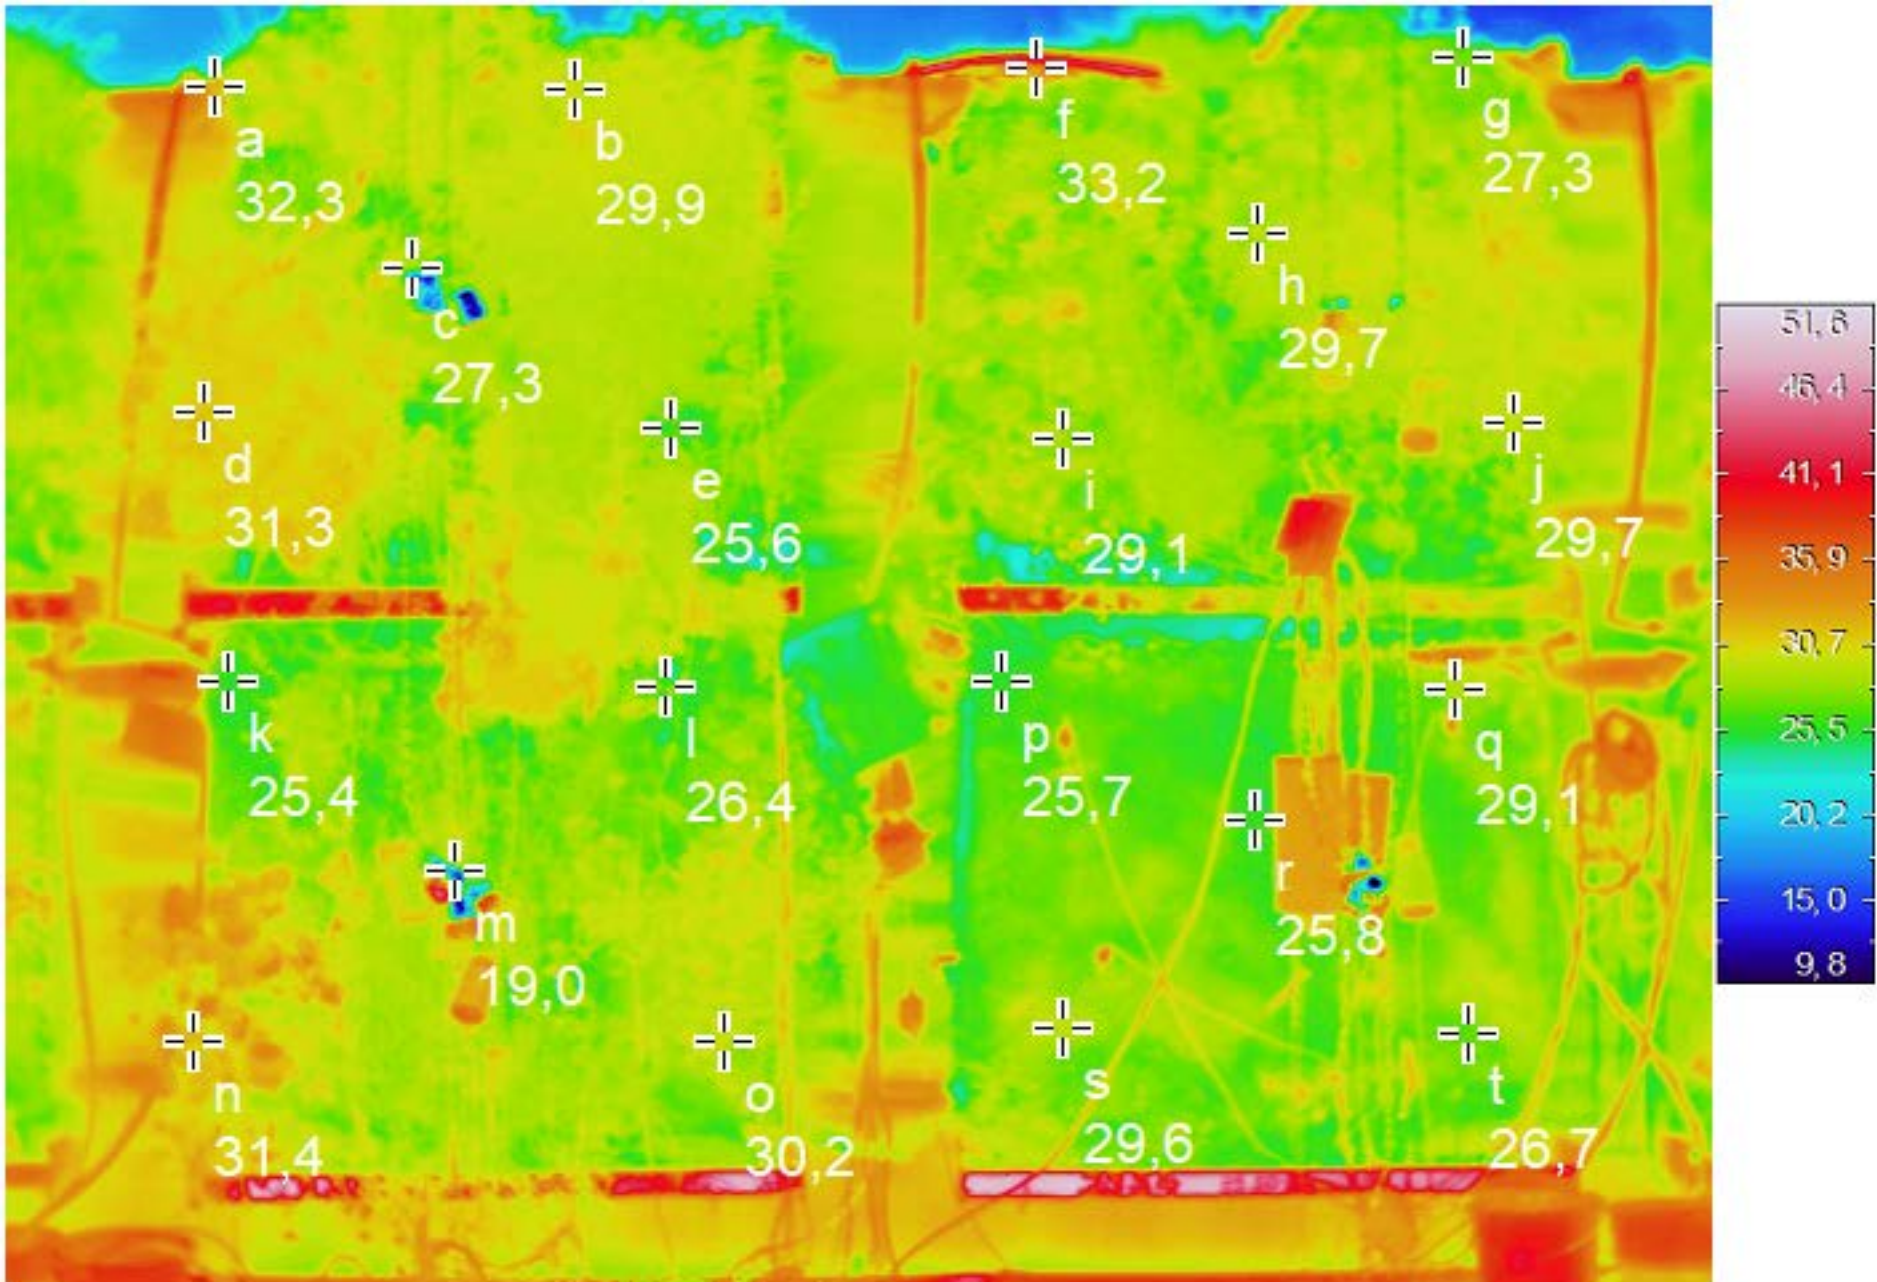

DateinameT02172IR.JPG  
Messtag:2019/06/19  
Messzeit:14:36:16  
Kommentar:  
Kameramodell:R500P  
Range:1[-20,0C-60,0C]  
BildmodusMEDx1,00  
Externes Objektiv:Standard  
Emissionsgrad:1.00  
Ambient Temp: 24,9IC  
IR Bildx1,00



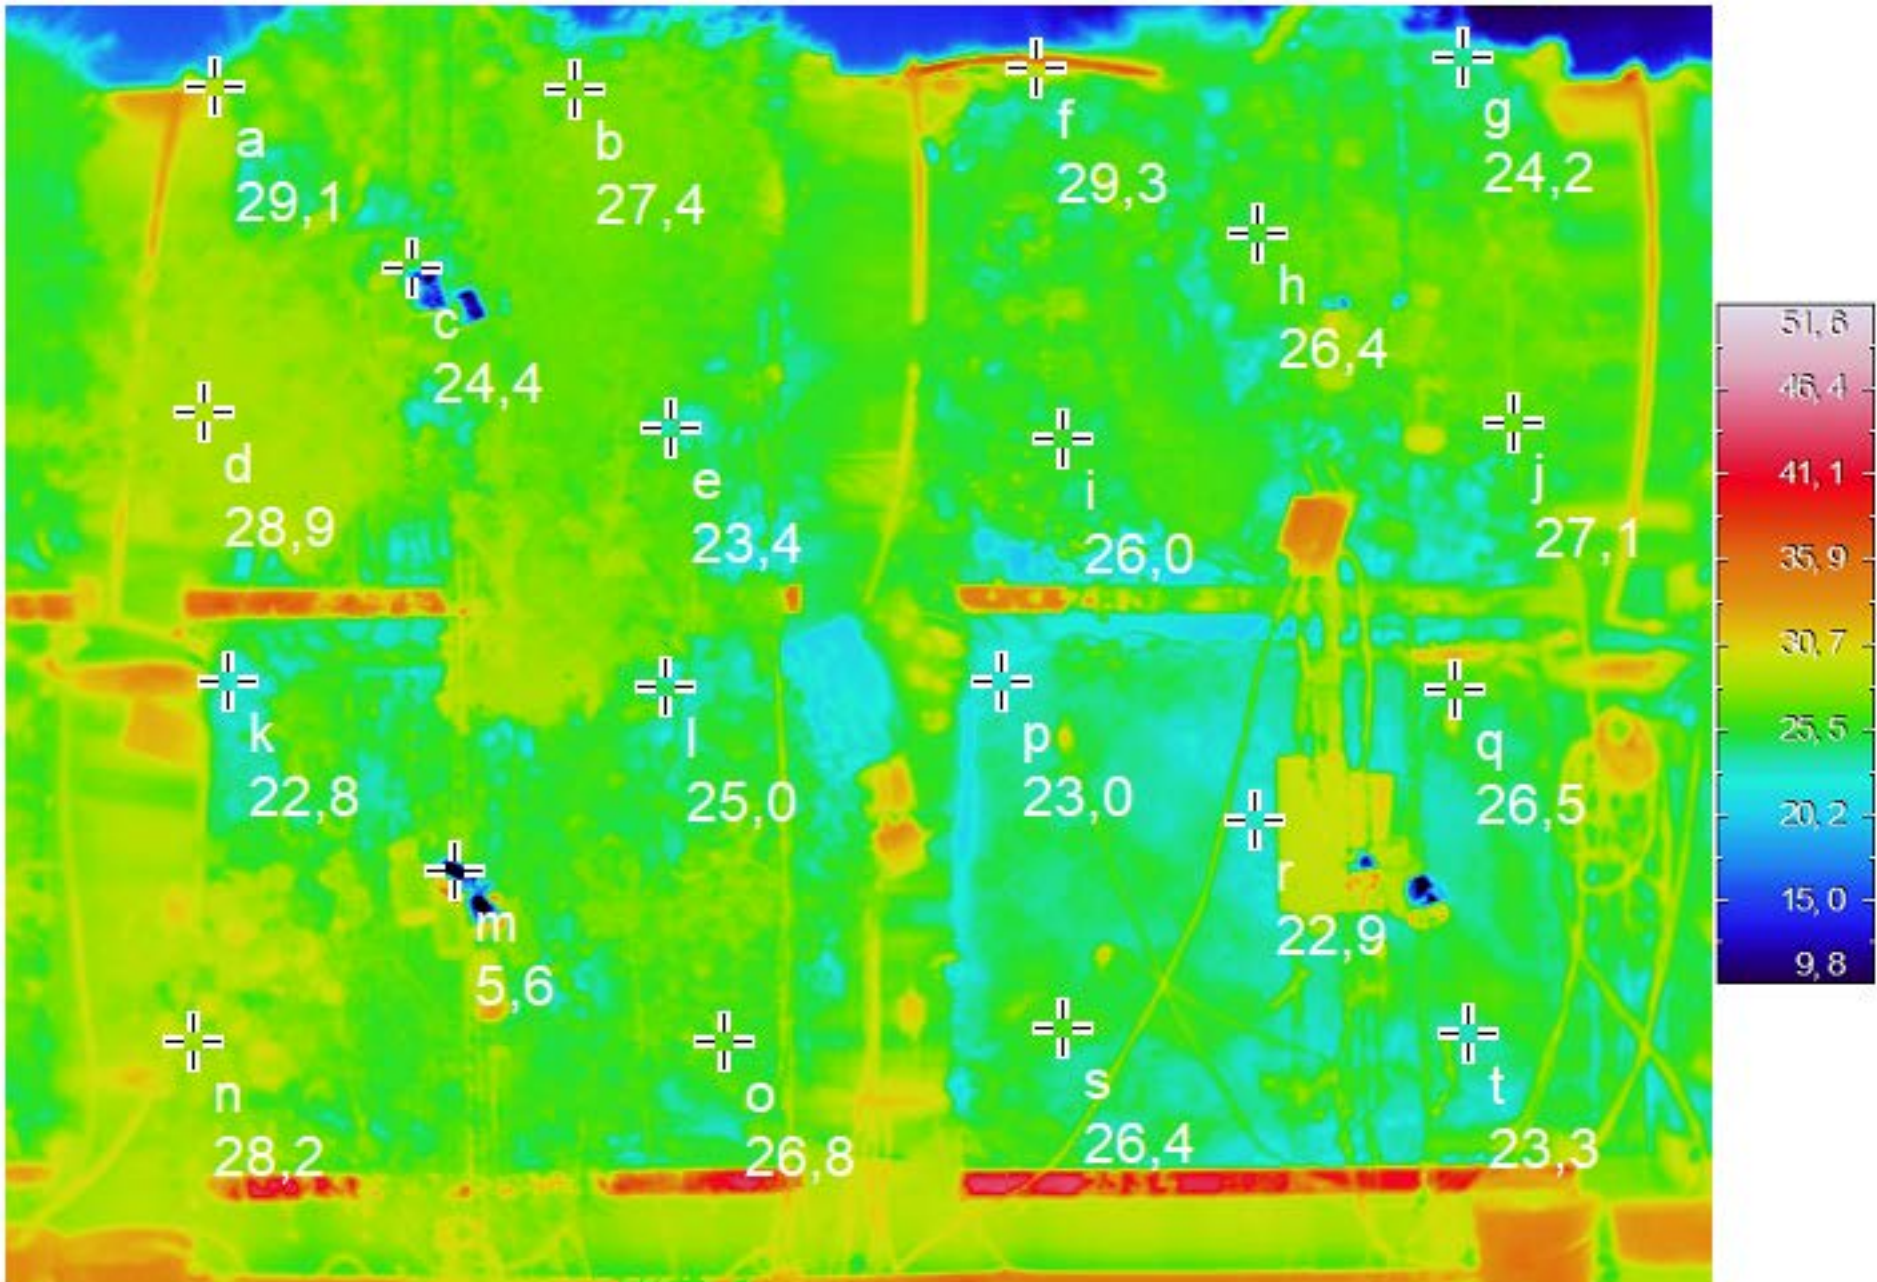

DateinameT02173IR.JPG  
Messtag:2019/06/19  
Messzeit:14:40:16  
Kommentar:  
Kameramodell:R500P  
Range:1[-20,0C-60,0C]  
BildmodusMEDx1,00  
Externes Objektiv:Standard  
Emissionsgrad:1.00  
Ambient Temp: 24,9IC  
IR Bildx1,00



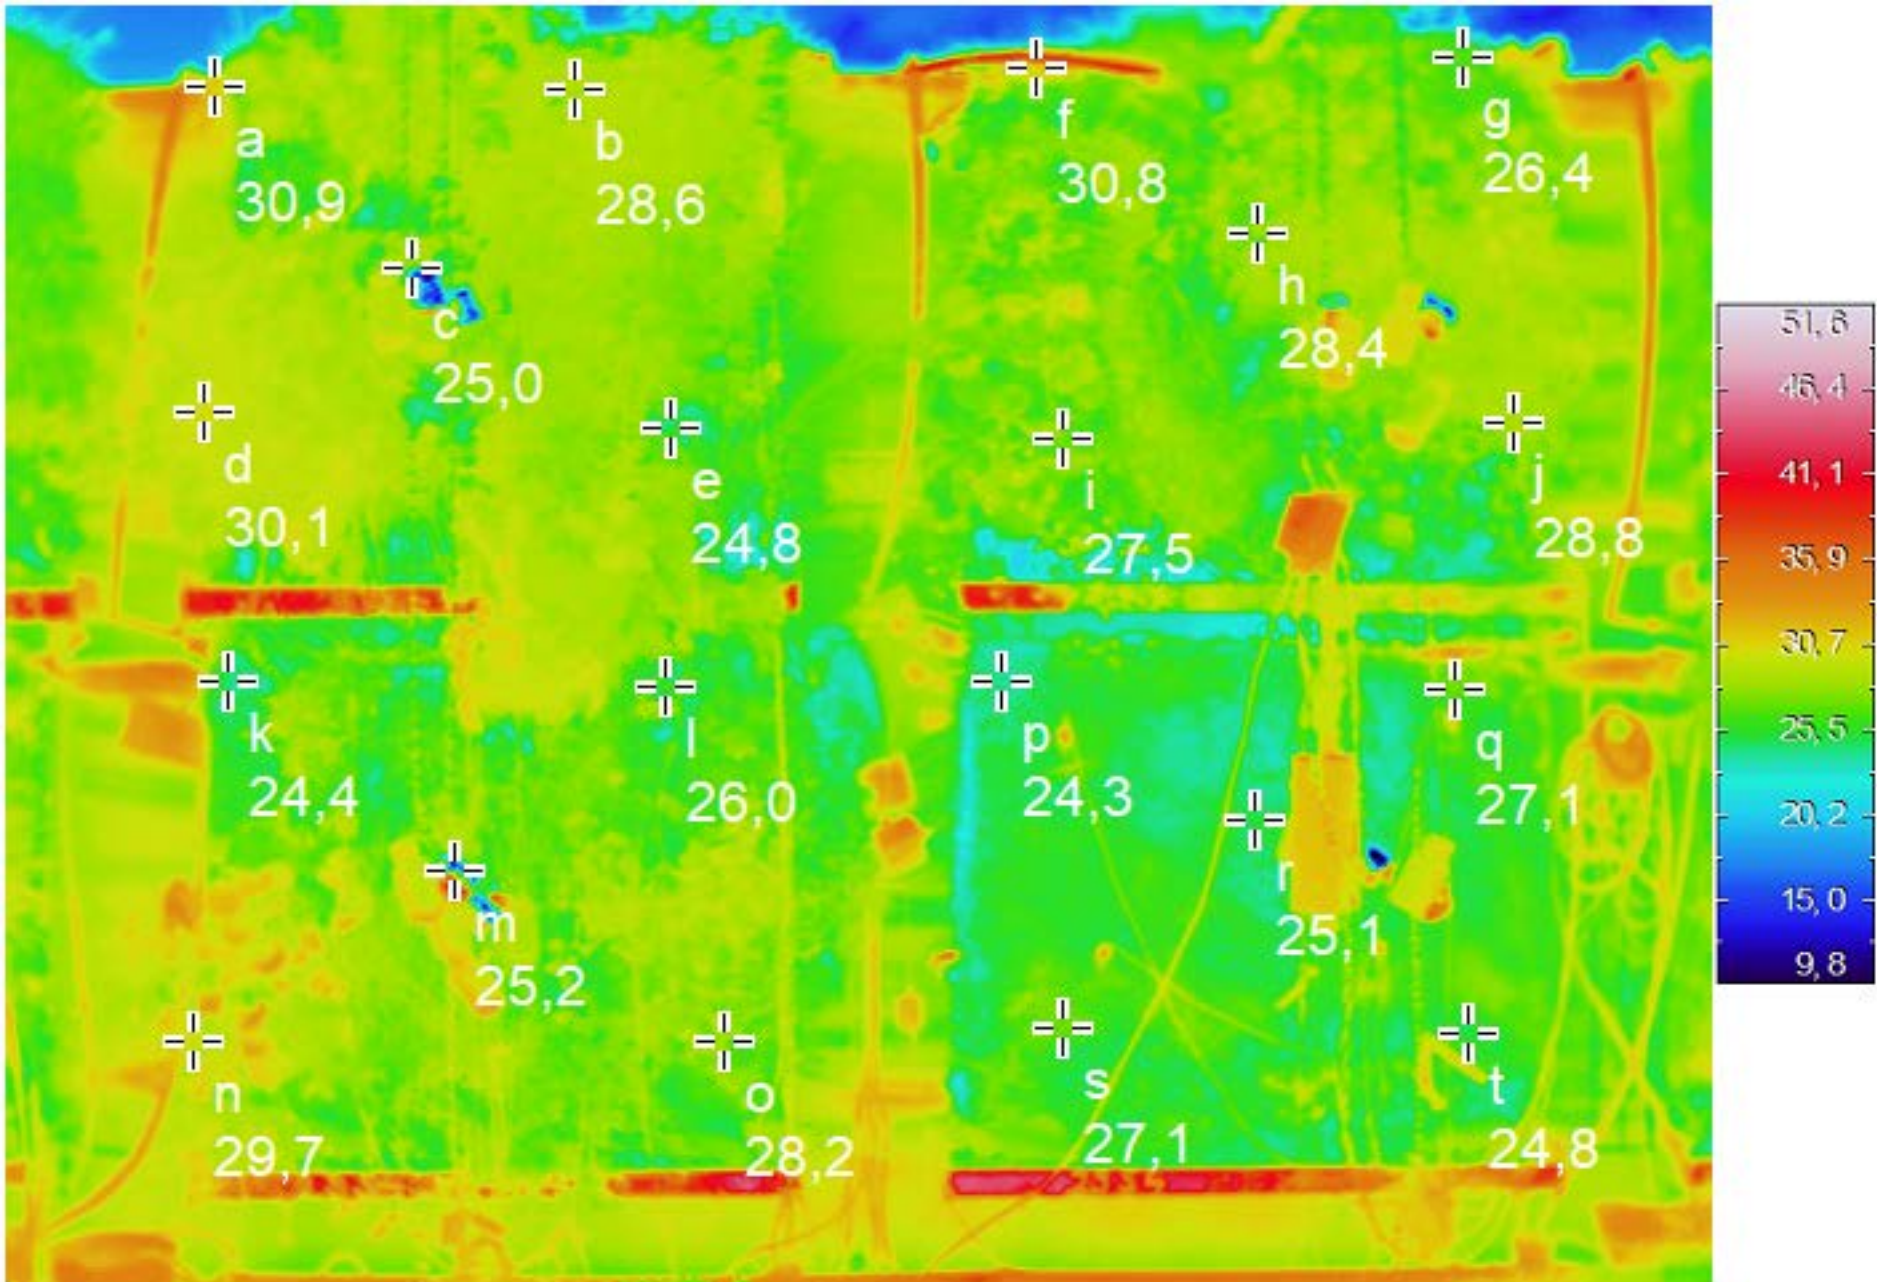

DateinameT02176IR.JPG  
Messtag:2019/06/19  
Messzeit:14:52:16  
Kommentar:  
Kameramodell:R500P  
Range:1[-20,0C-60,0C]  
BildmodusMEDx1,00  
Externes Objektiv:Standard  
Emissionsgrad:1.00  
Ambient Temp: 24,9IC  
IR Bildx1,00



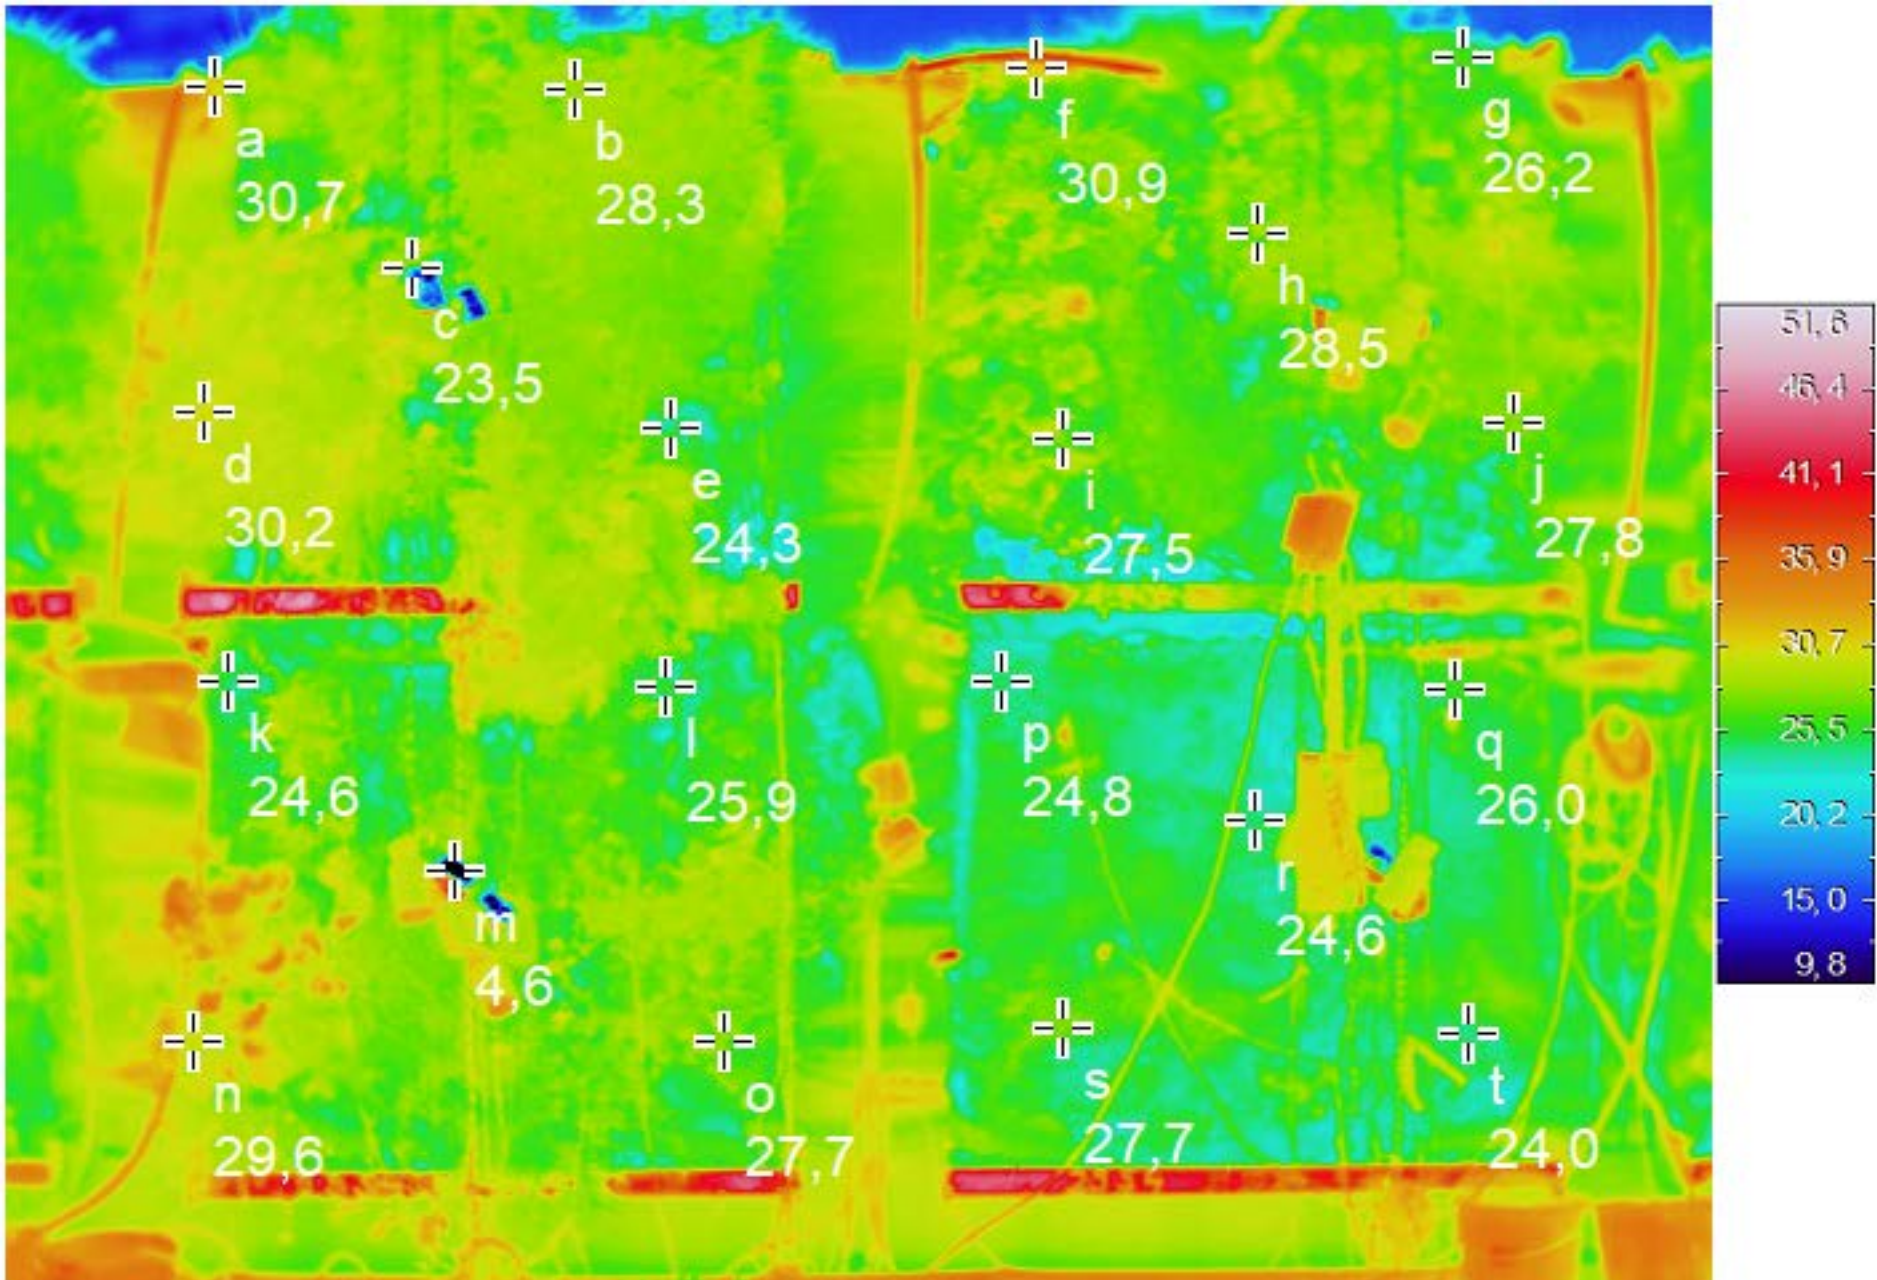

DateinameT02177IR.JPG  
Messtag:2019/06/19  
Messzeit:14:56:16  
Kommentar:  
Kameramodell:R500P  
Range:1[-20,0C-60,0C]  
BildmodusMEDx1,00  
Externes Objektiv:Standard  
Emissionsgrad:1.00  
Ambient Temp: 24,9IC  
IR Bildx1,00



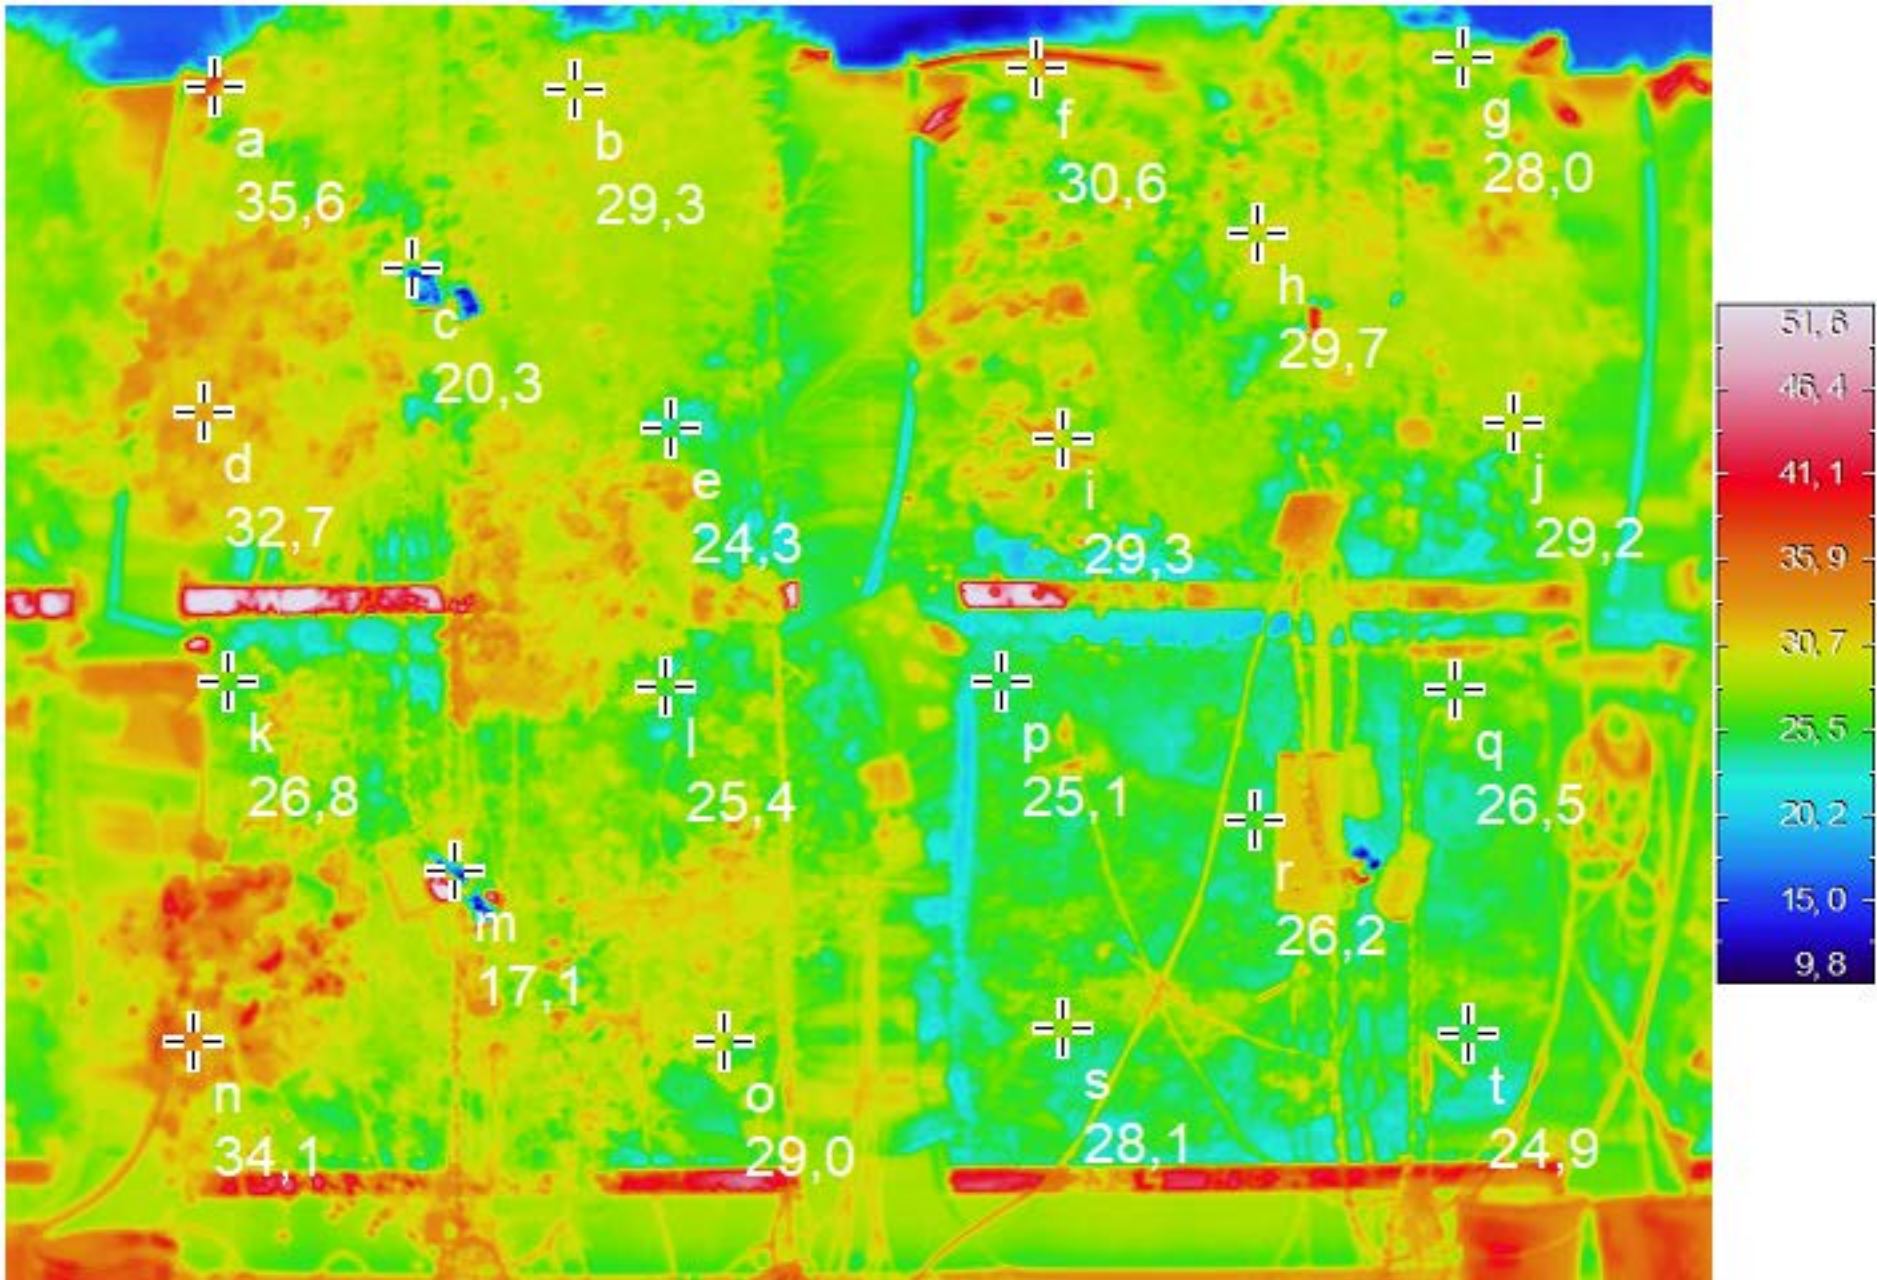

DateinameT02179IR.JPG  
Messtag:2019/06/19  
Messzeit:15:04:16  
Kommentar:  
Kameramodell:R500P  
Range:1[-20,0C-60,0C]  
BildmodusMEDx1,00  
Externes Objektiv:Standard  
Emissionsgrad:1.00  
Ambient Temp: 24,9IC  
IR Bildx1,00



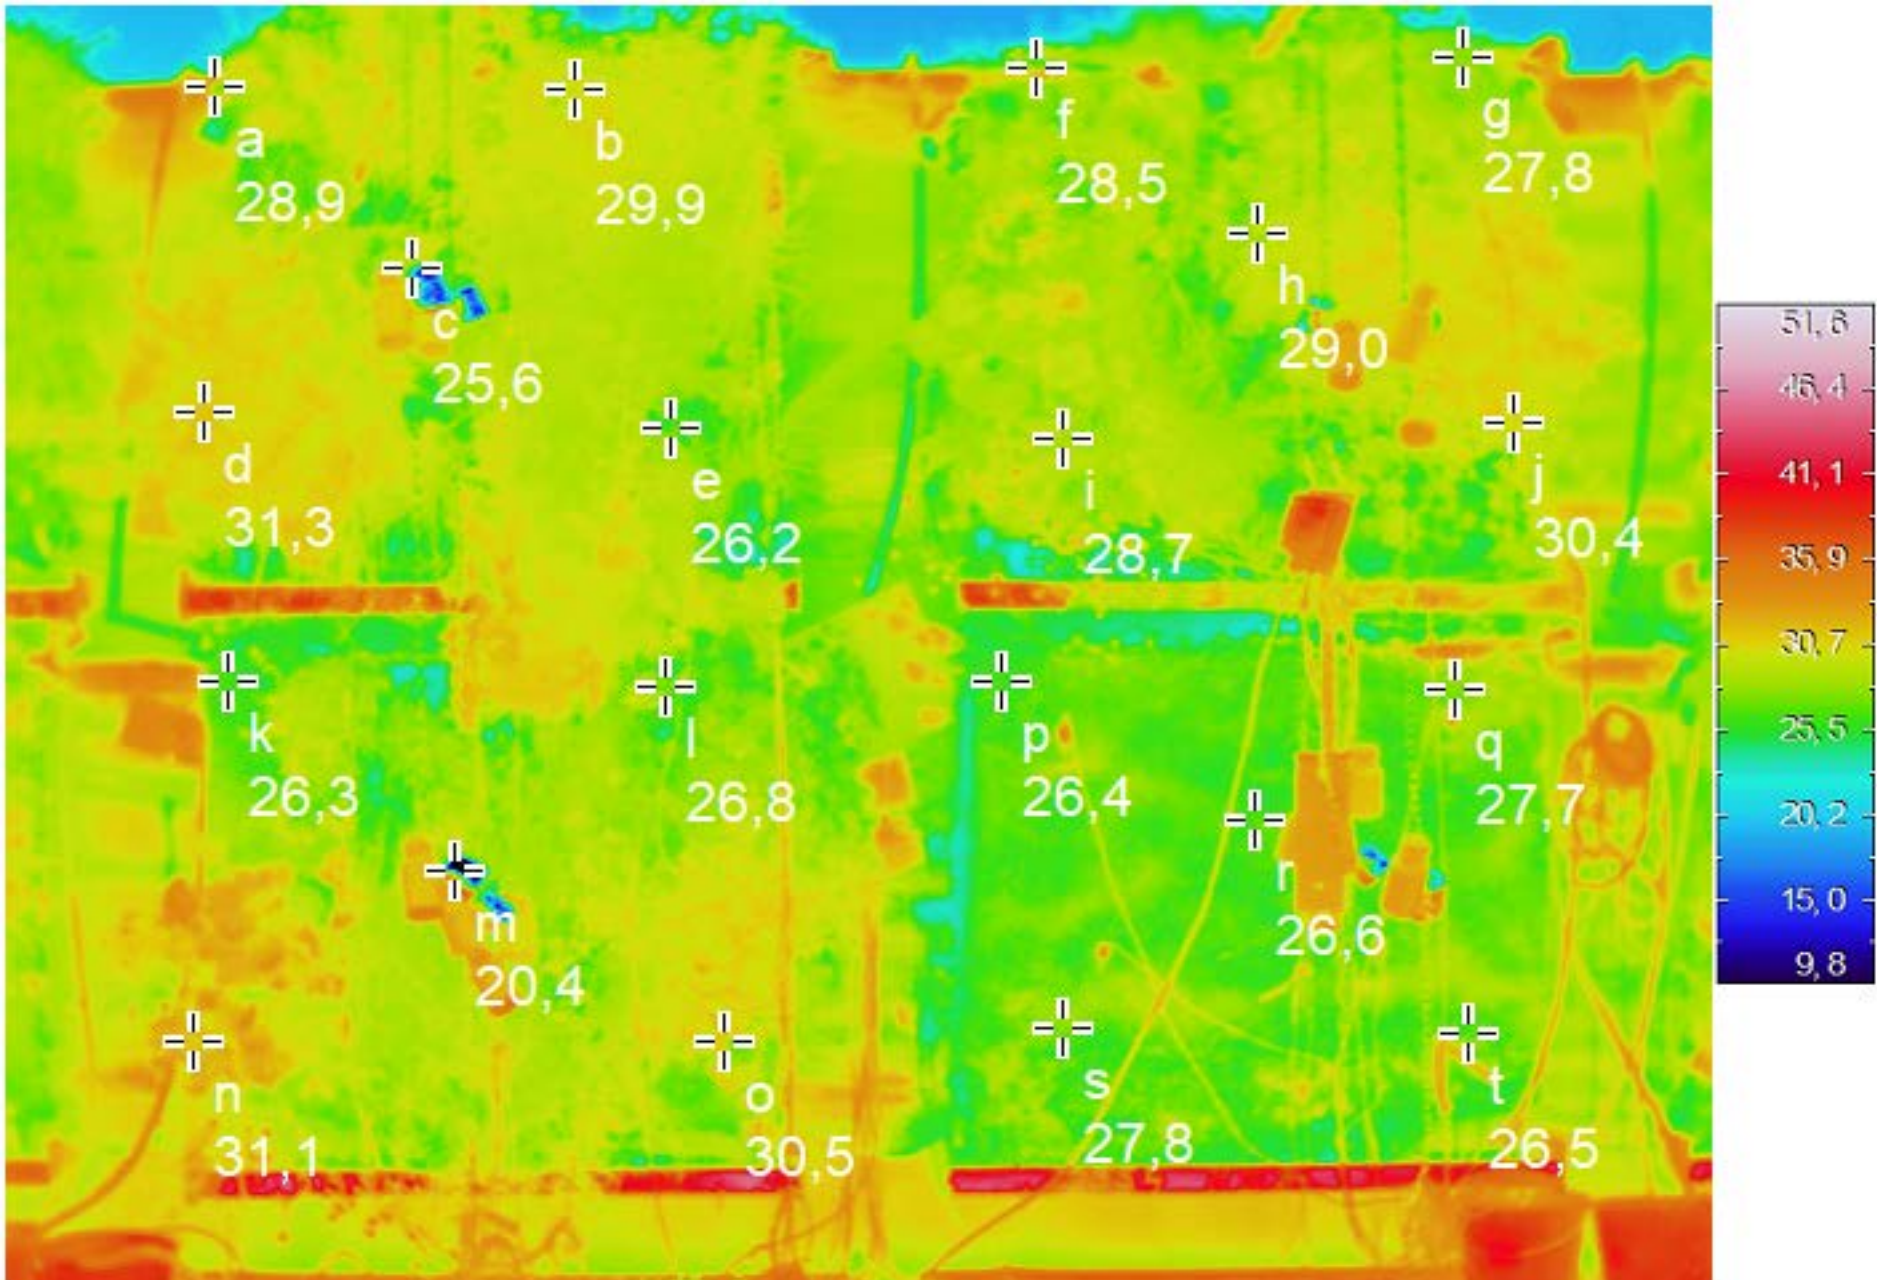

DateinameT02180IR.JPG  
Messtag:2019/06/19  
Messzeit:15:08:16  
Kommentar:  
Kameramodell:R500P  
Range:1[-20,0C-60,0C]  
BildmodusMEDx1,00  
Externes Objektiv:Standard  
Emissionsgrad:1.00  
Ambient Temp: 24,9IC  
IR Bildx1,00



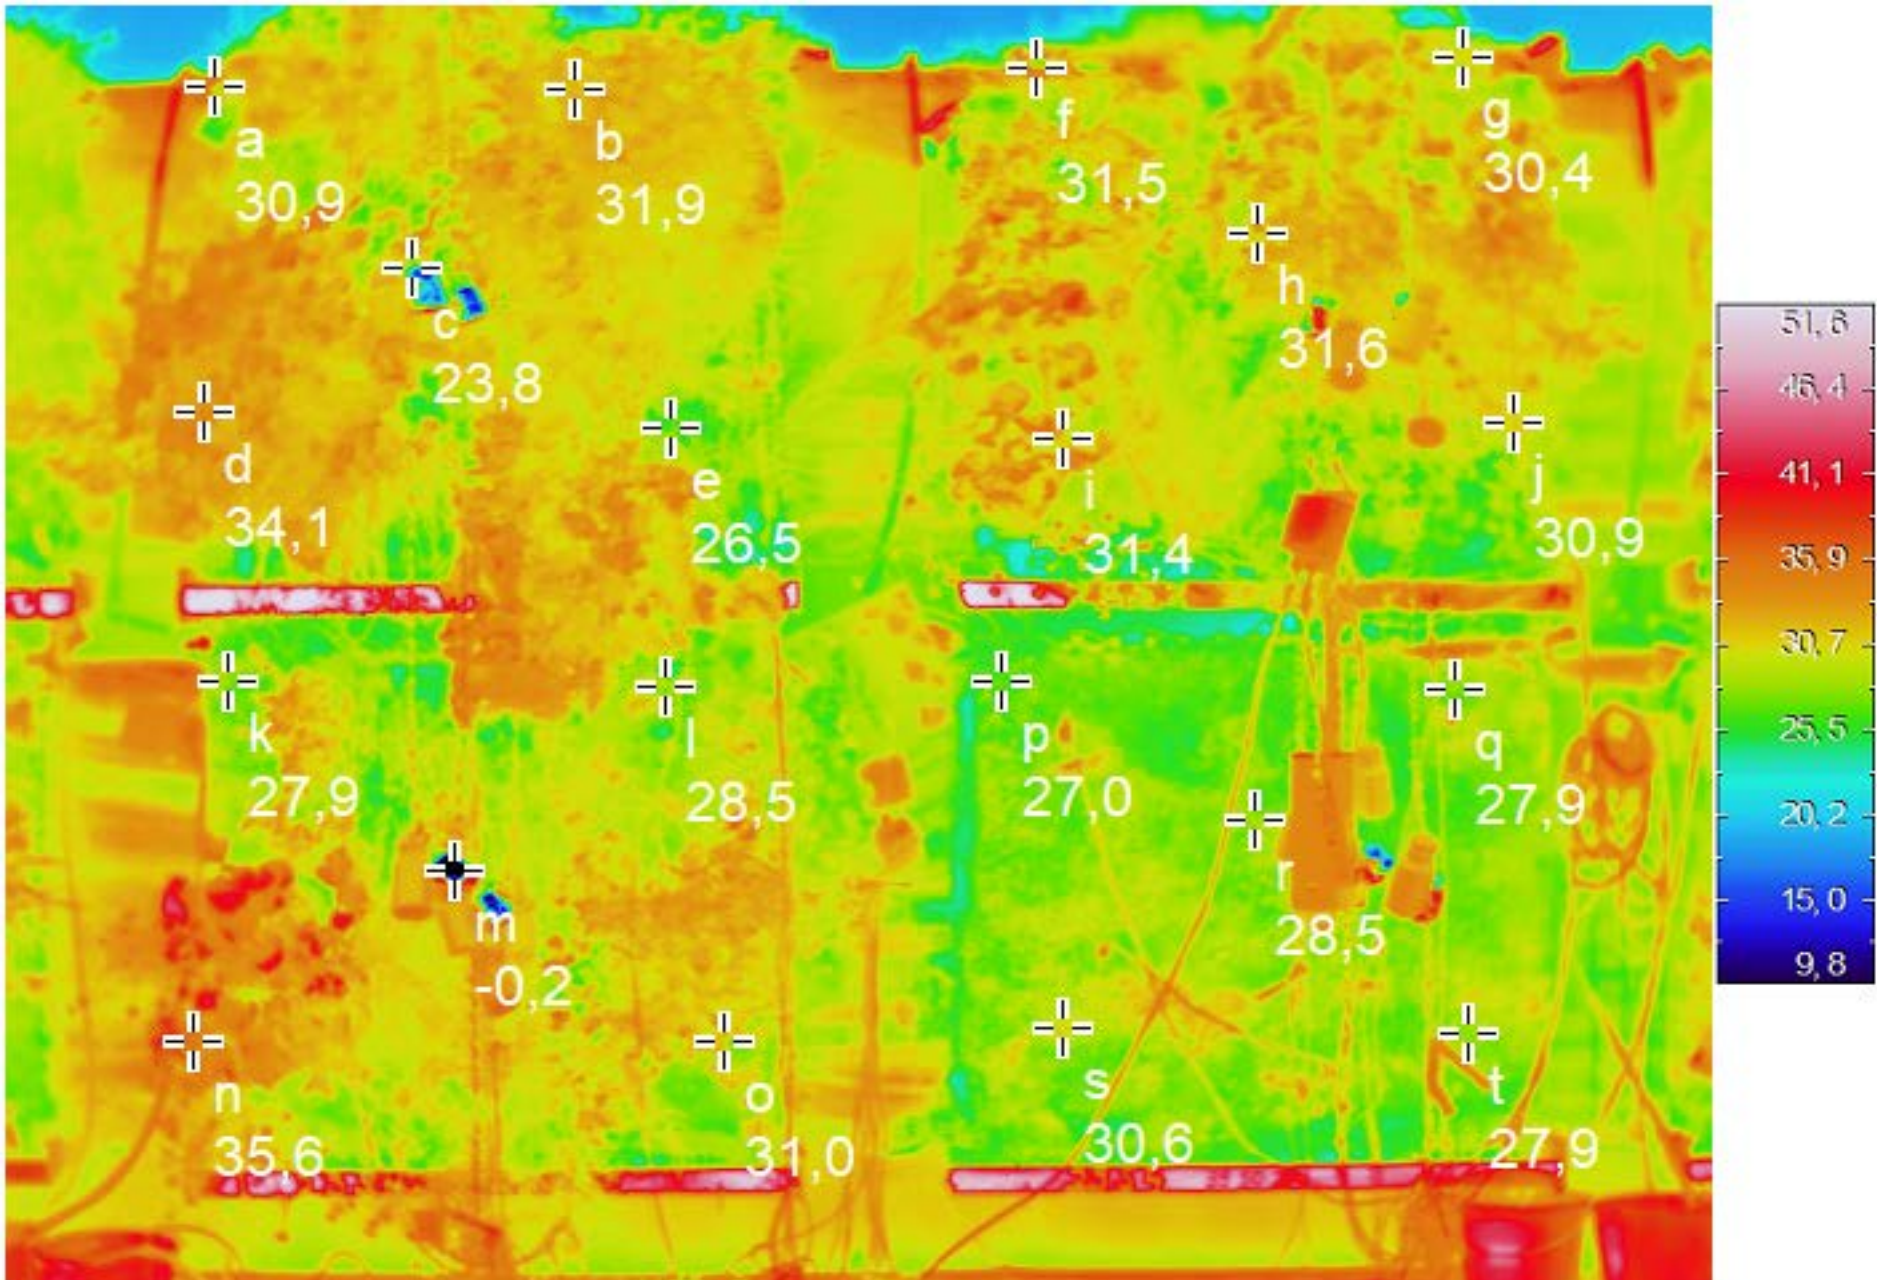

DateinameT02181IR.JPG  
Messtag:2019/06/19  
Messzeit:15:12:16  
Kommentar:  
Kameramodell:R500P  
Range:1[-20,0C-60,0C]  
BildmodusMEDx1,00  
Externes Objektiv:Standard  
Emissionsgrad:1.00  
Ambient Temp: 24,9IC  
IR Bildx1,00



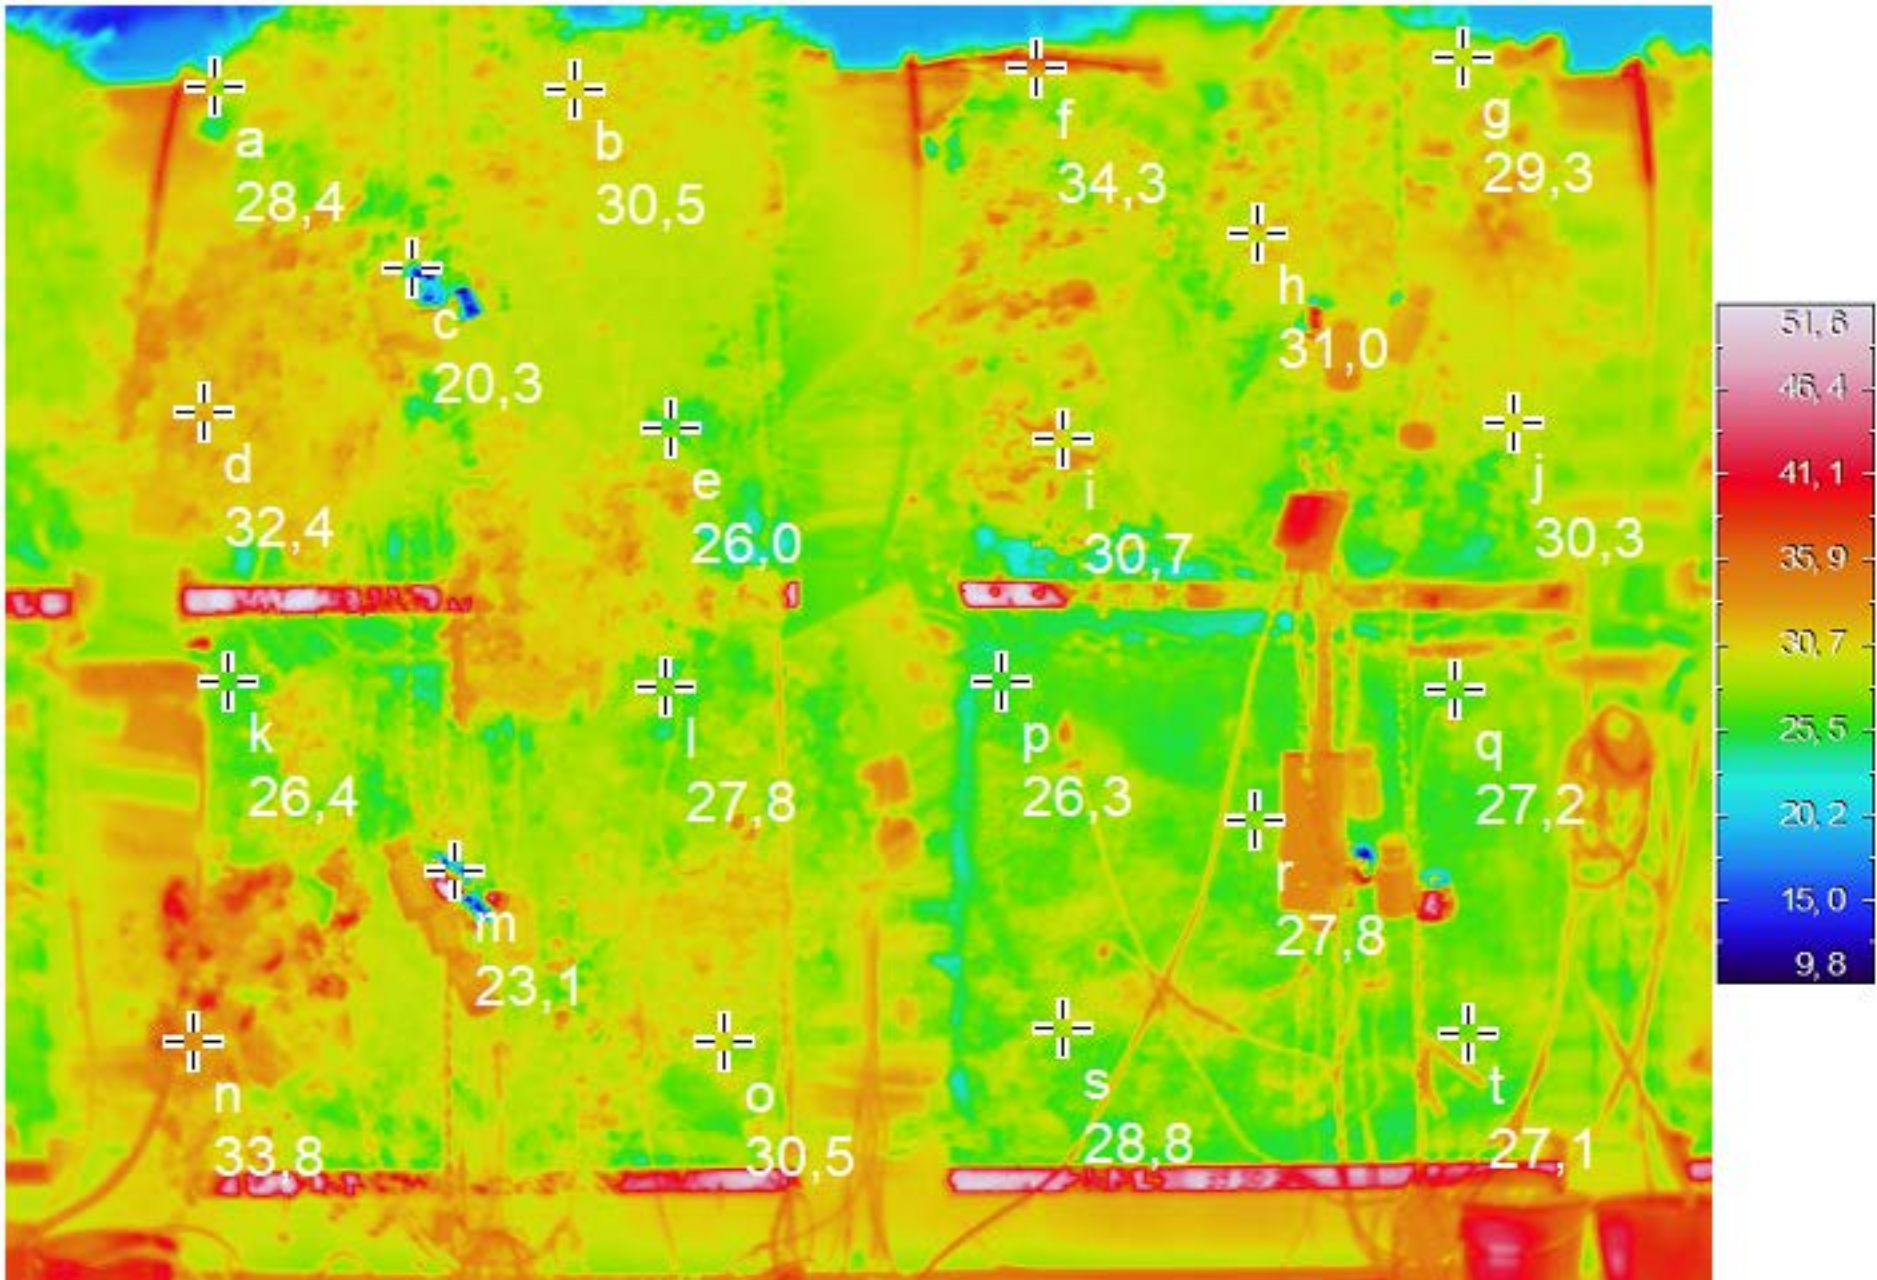

DateinameT02182IR.JPG  
Messtag:2019/06/19  
Messzeit:15:16:16  
Kommentar:  
Kameramodell:R500P  
Range:1[-20,0C-60,0C]  
BildmodusMEDx1,00  
Externes Objektiv:Standard  
Emissionsgrad:1.00  
Ambient Temp: 24,9IC  
IR Bildx1,00



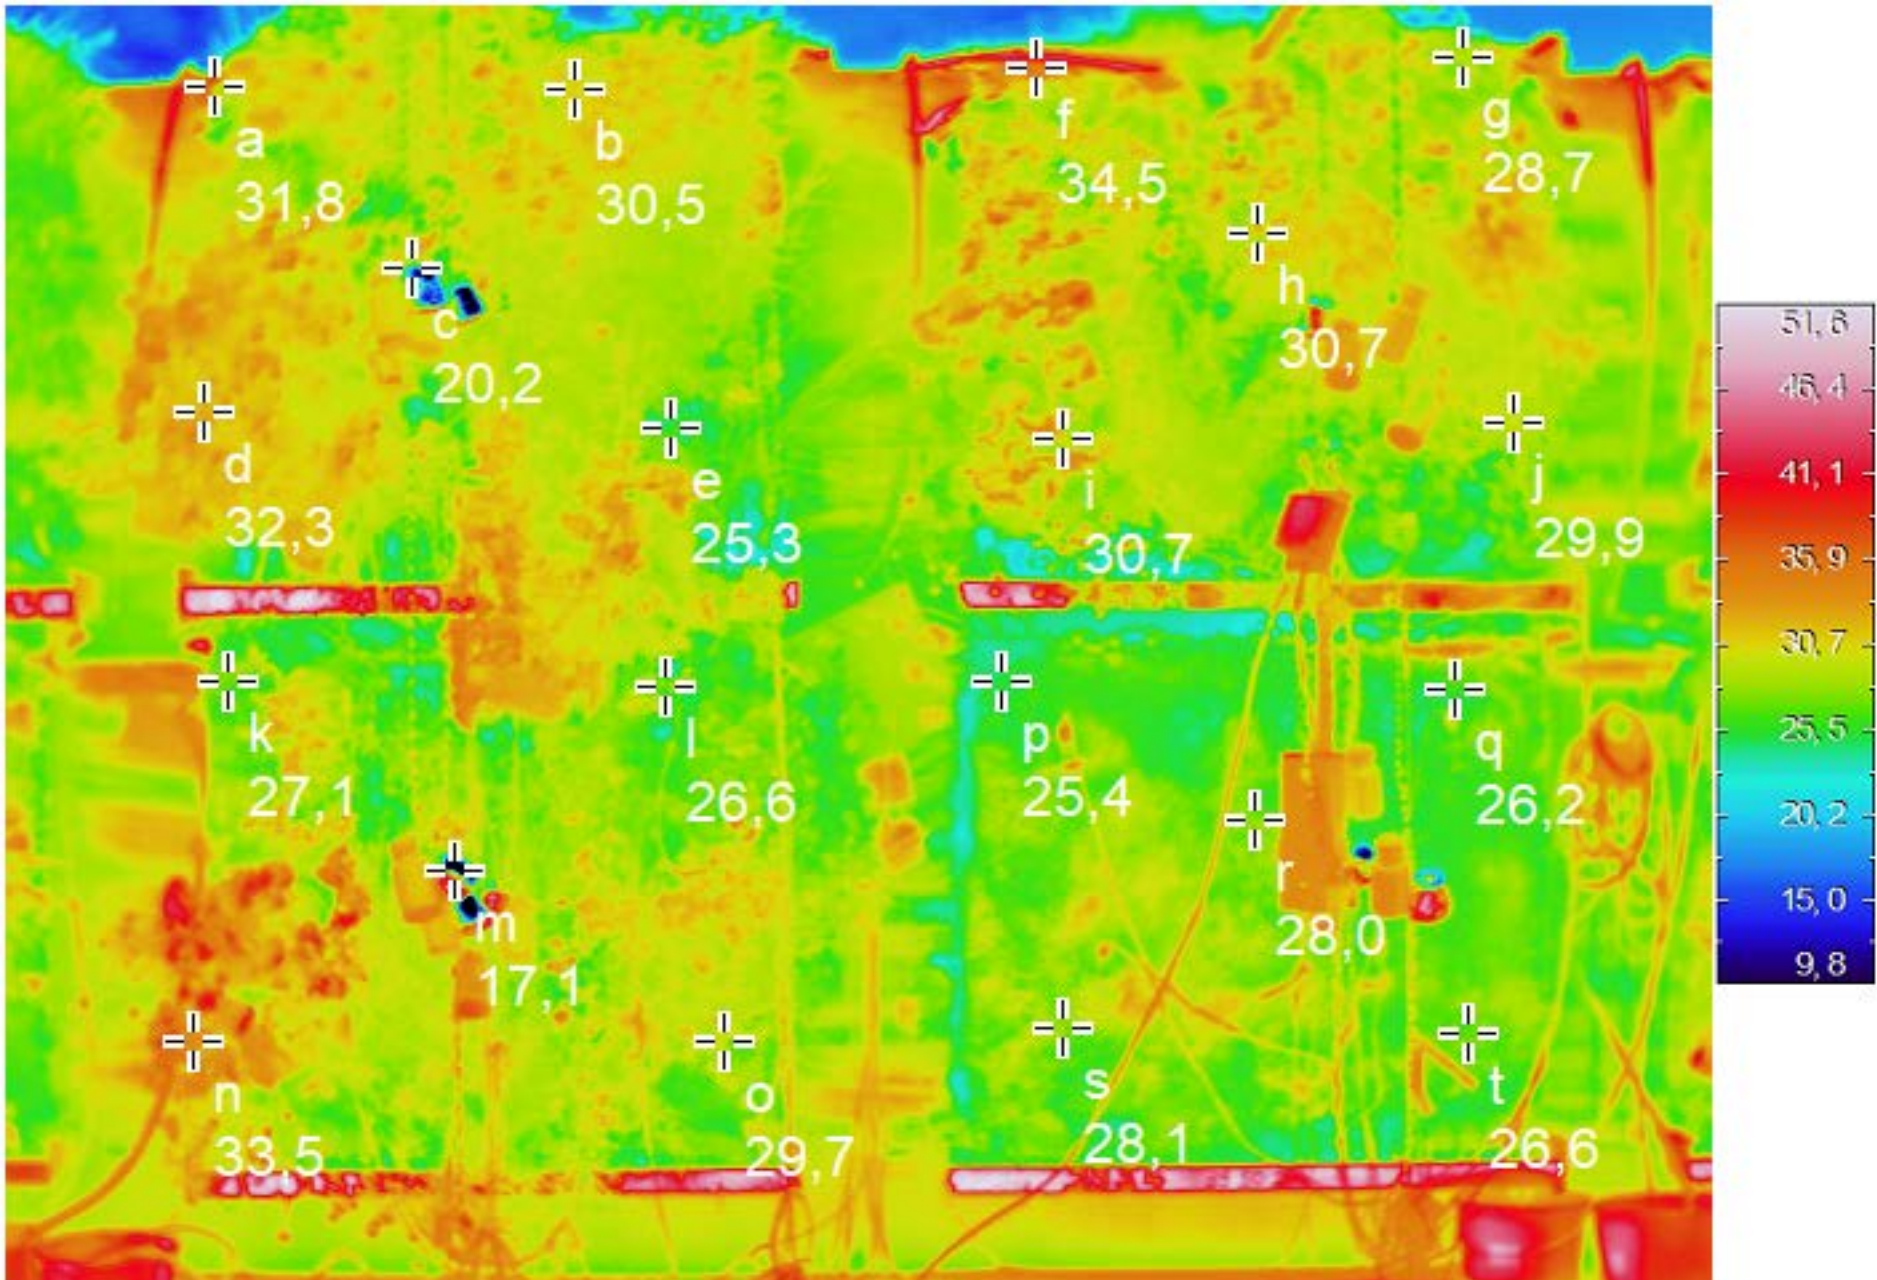

DateinameT02183IR.JPG  
Messtag:2019/06/19  
Messzeit:15:20:17  
Kommentar:  
Kameramodell:R500P  
Range:1[-20,0C-60,0C]  
BildmodusMEDx1,00  
Externes Objektiv:Standard  
Emissionsgrad:1.00  
Ambient Temp: 24,9IC  
IR Bildx1,00



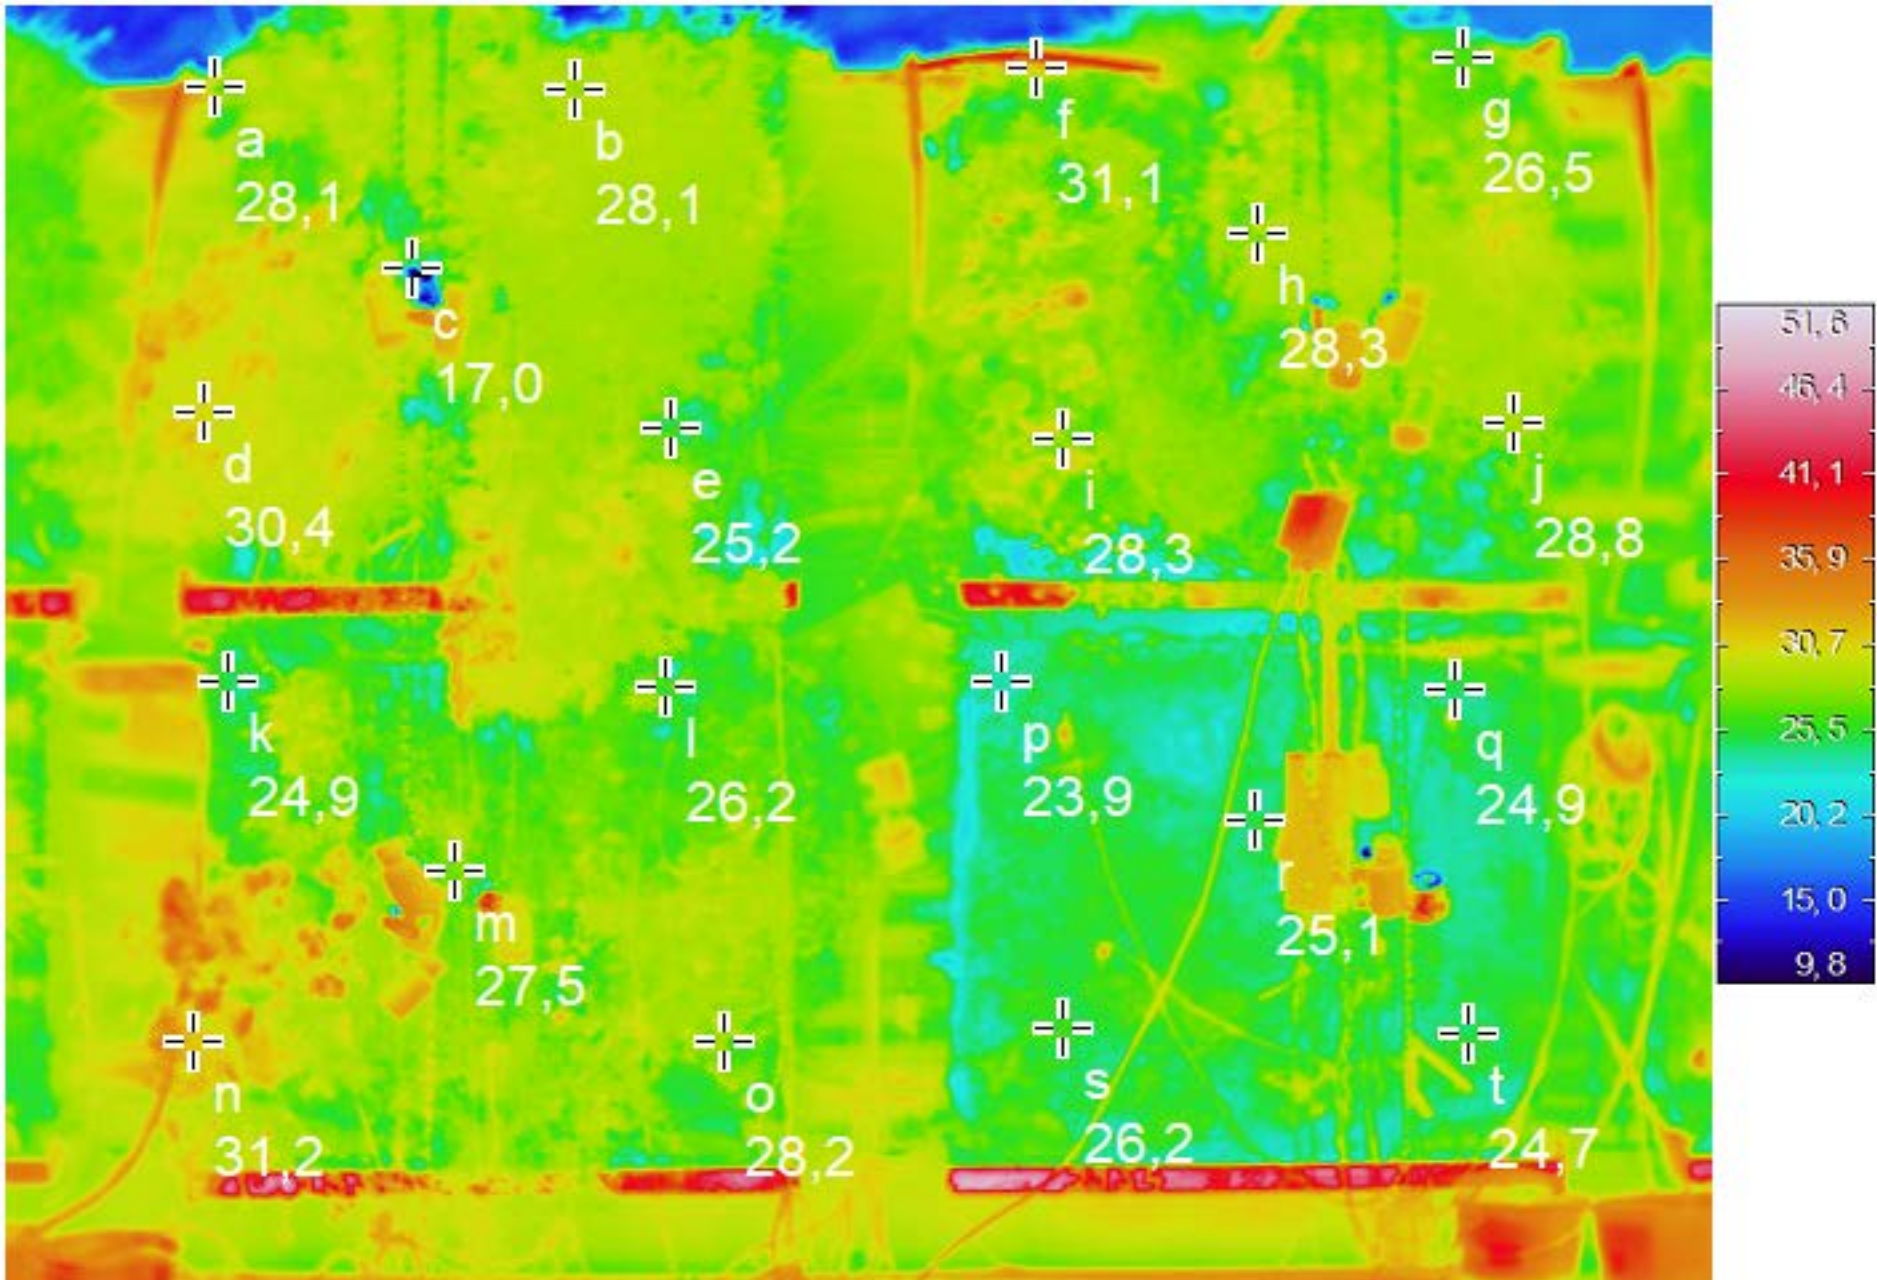

DateinameT02184IR.JPG  
Messtag:2019/06/19  
Messzeit:15:24:16  
Kommentar:  
Kameramodell:R500P  
Range:1[-20,0C-60,0C]  
BildmodusMEDx1,00  
Externes Objektiv:Standard  
Emissionsgrad:1.00  
Ambient Temp: 24,9IC  
IR Bildx1,00



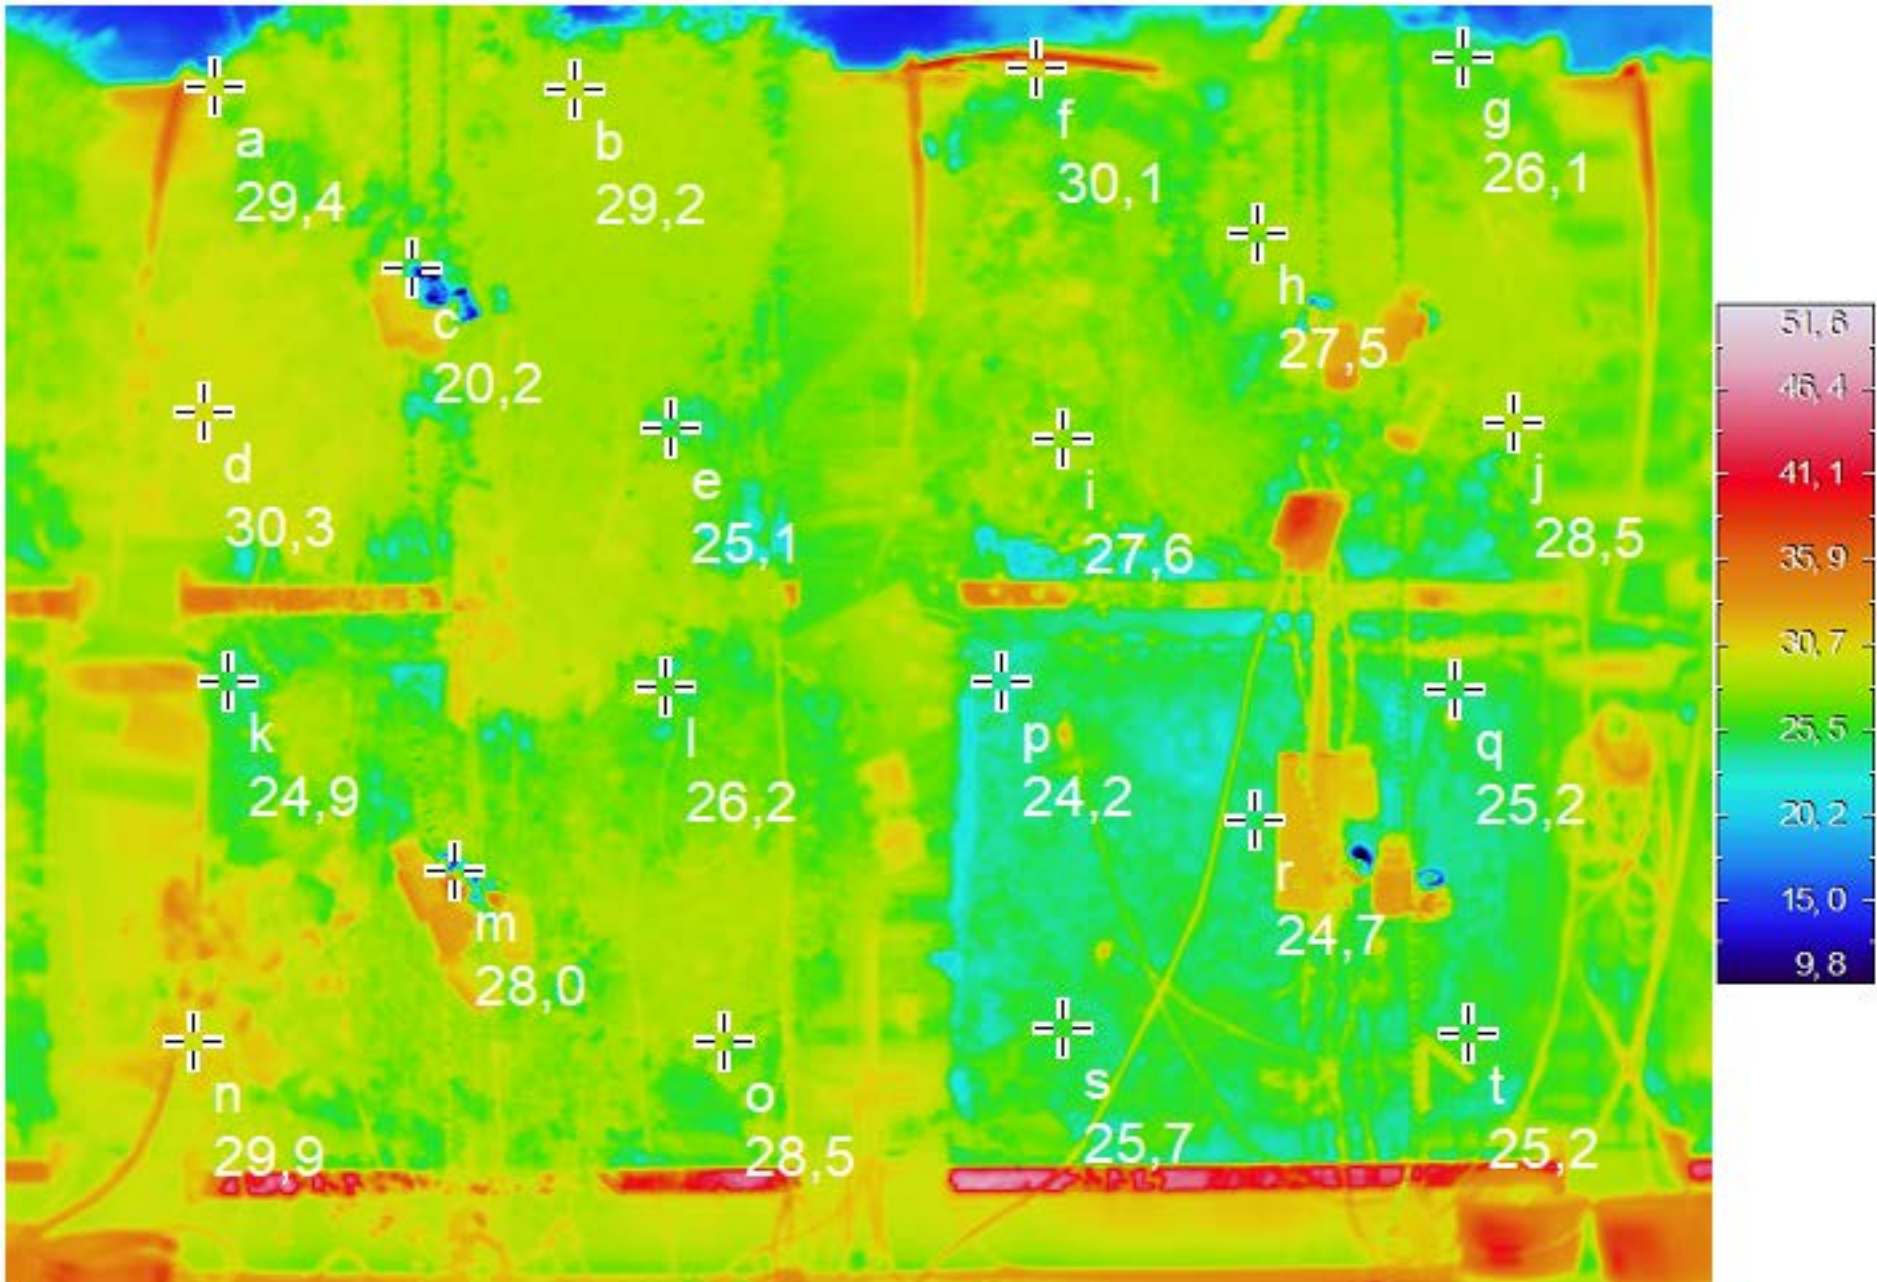

DateinameT02185IR.JPG  
Messtag:2019/06/19  
Messzeit:15:28:16  
Kommentar:  
Kameramodell:R500P  
Range:1[-20,0C-60,0C]  
BildmodusMEDx1,00  
Externes Objektiv:Standard  
Emissionsgrad:1.00  
Ambient Temp: 24,9IC  
IR Bildx1,00



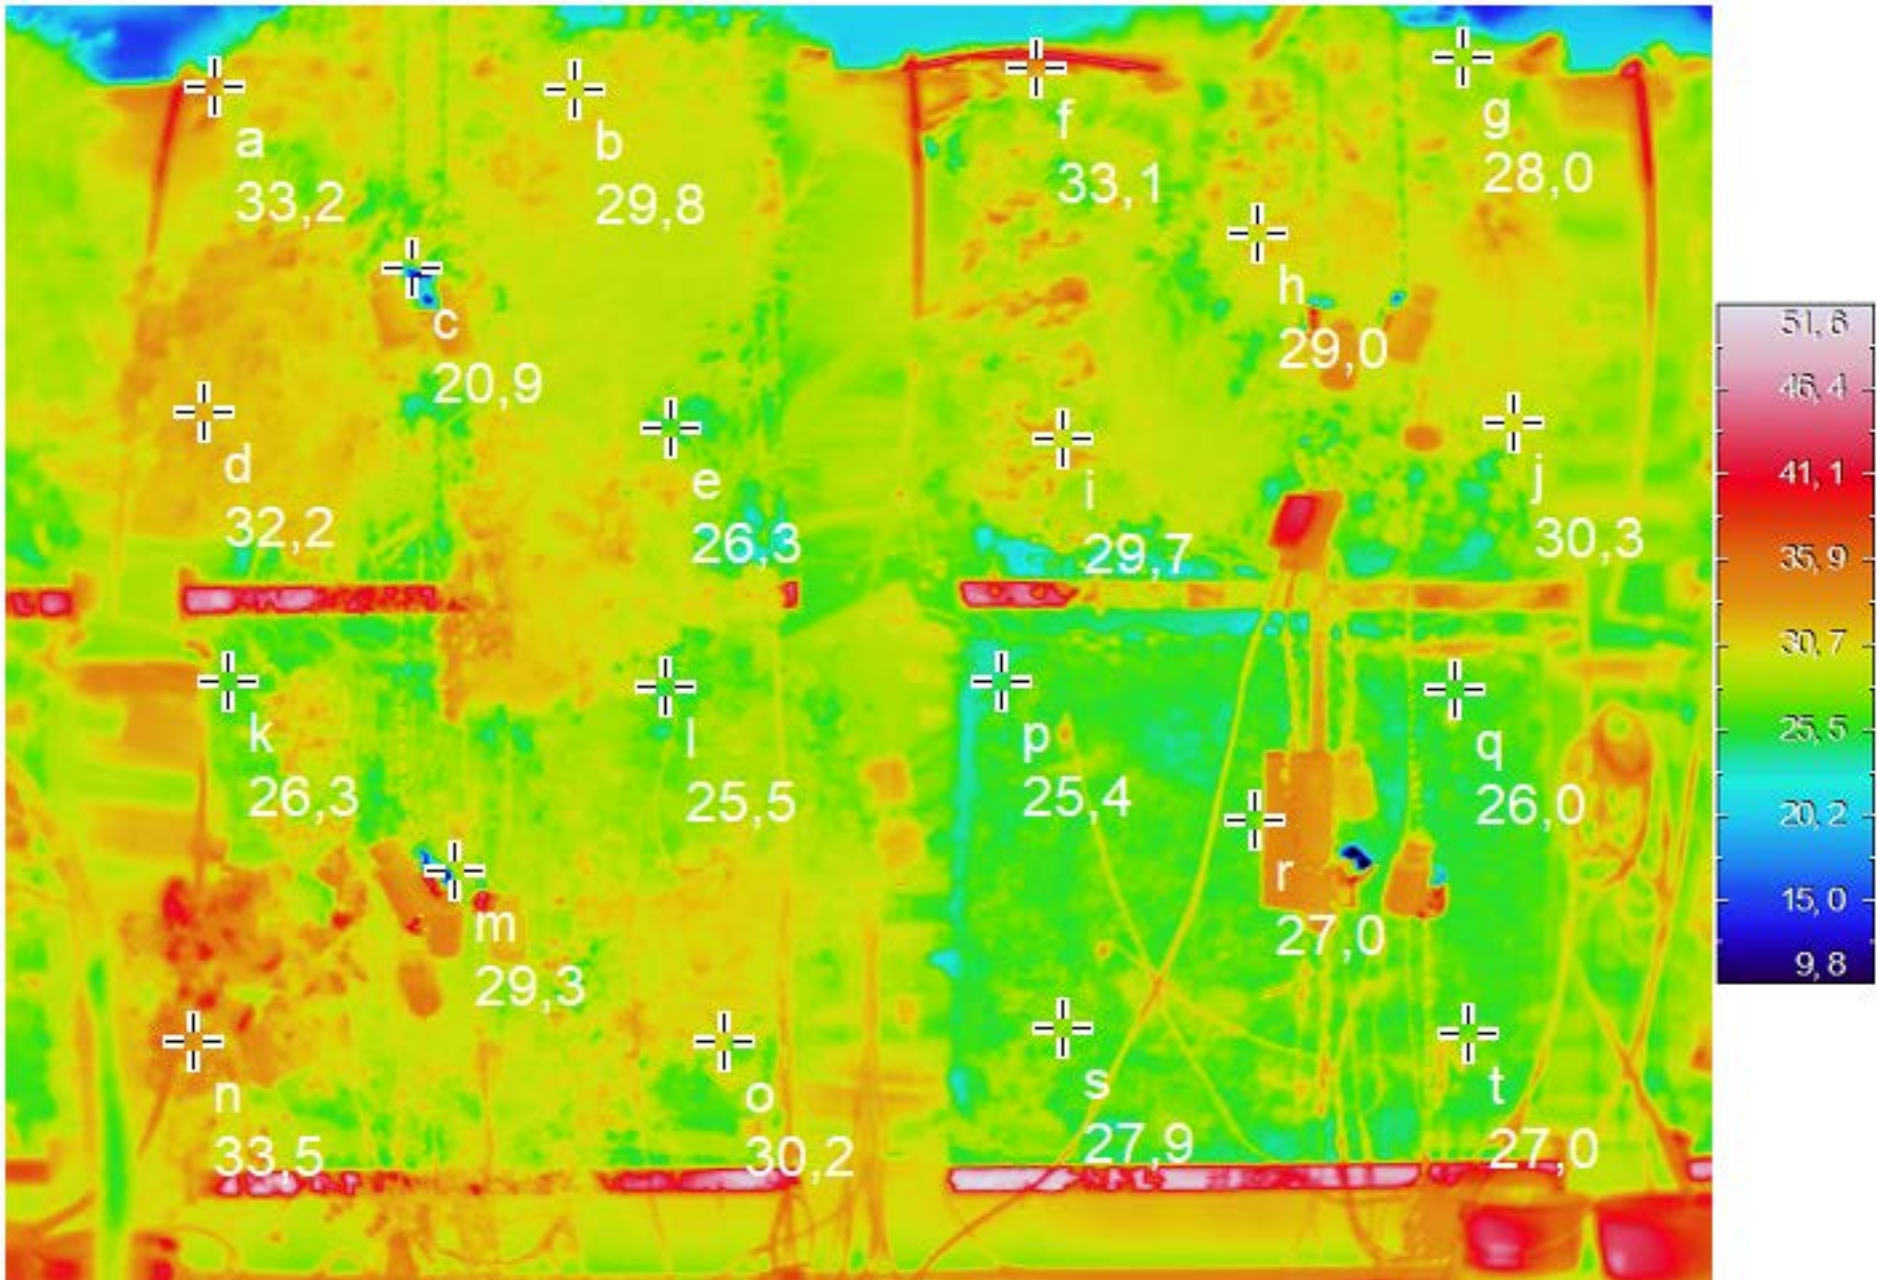

DateinameT02186IR.JPG  
Messtag:2019/06/19  
Messzeit:15:32:16  
Kommentar:  
Kameramodell:R500P  
Range:1[-20,0C-60,0C]  
BildmodusMEDx1,00  
Externes Objektiv:Standard  
Emissionsgrad:1.00  
Ambient Temp: 24,9IC  
IR Bildx1,00
