# Supplementary figures and images for: Living Wall Plants Are Affected by and Affect Temperature: How to (Not) Measure Plants’ Temperature in an Living Wall Experiment
Source: Preprints.org preprint supplement (doi:10.20944/preprints202306.0856.v1), 2023-06-12

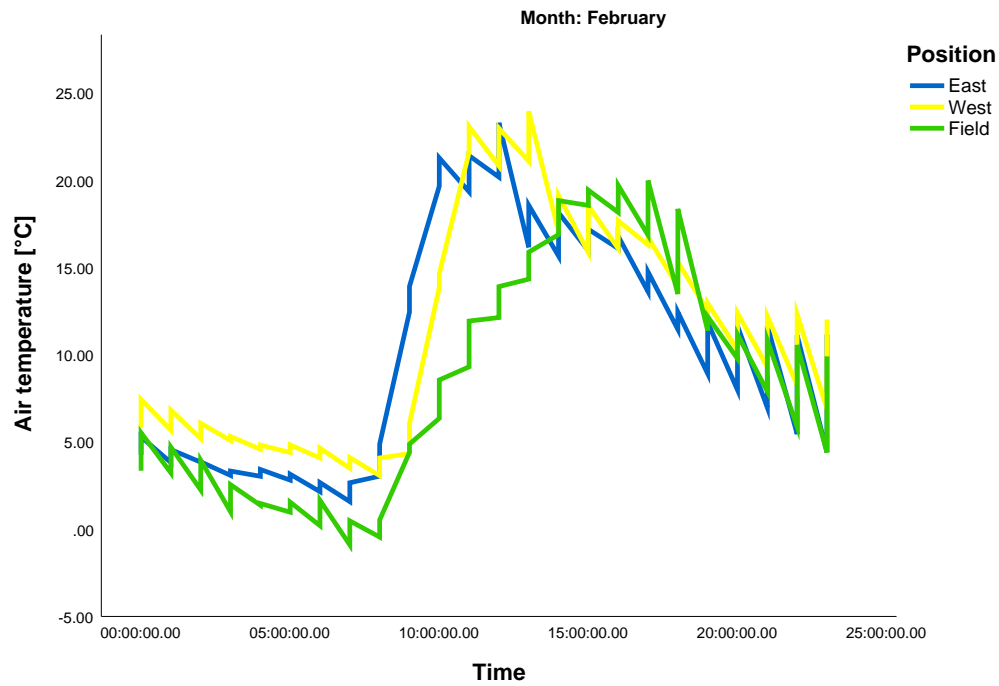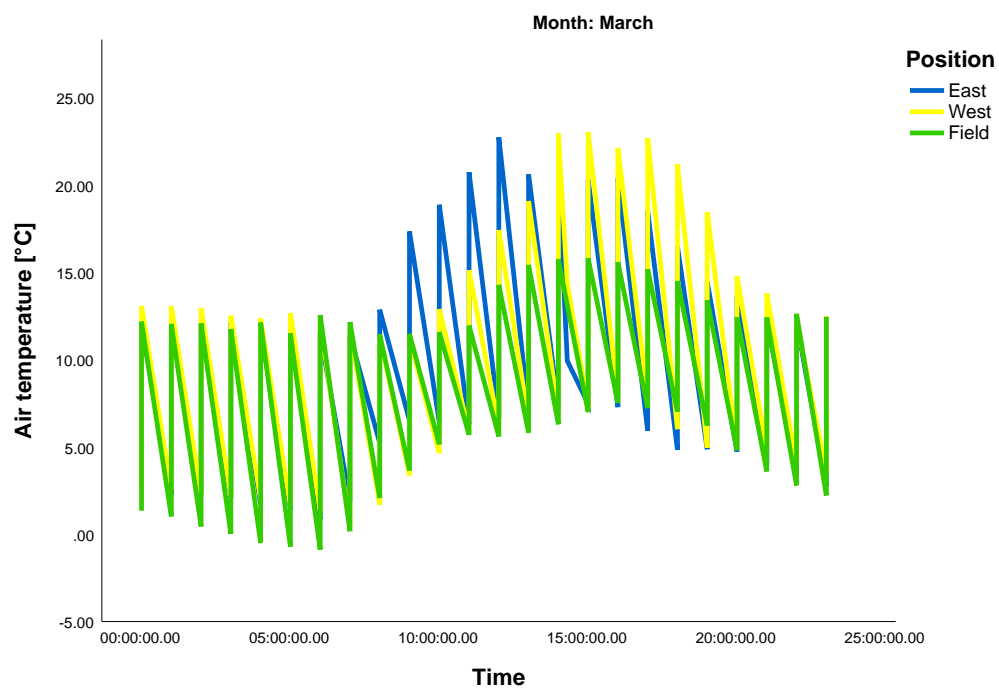

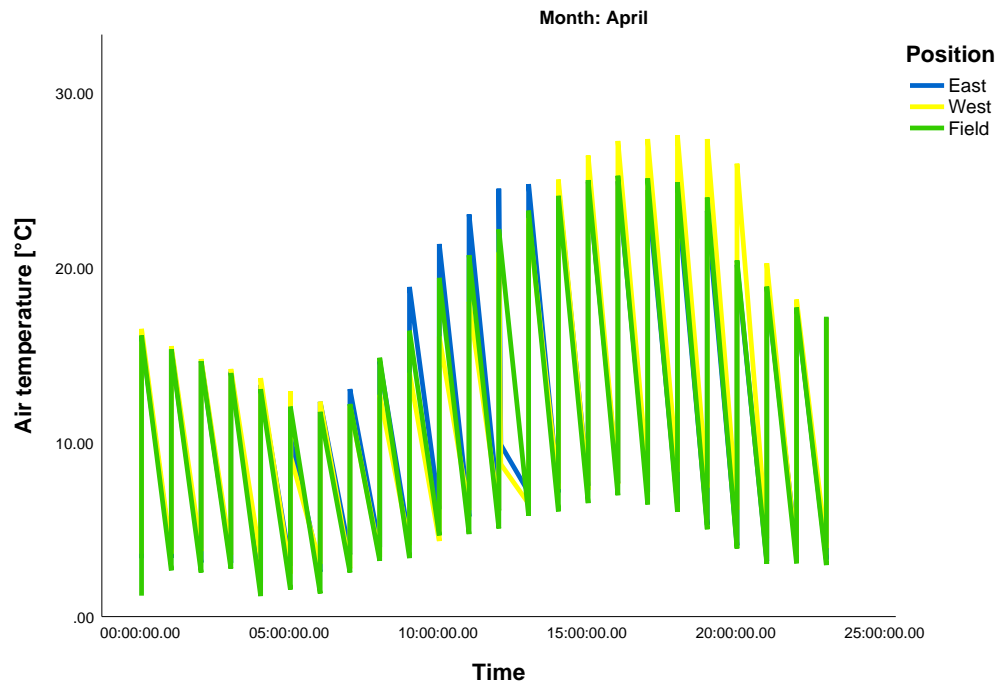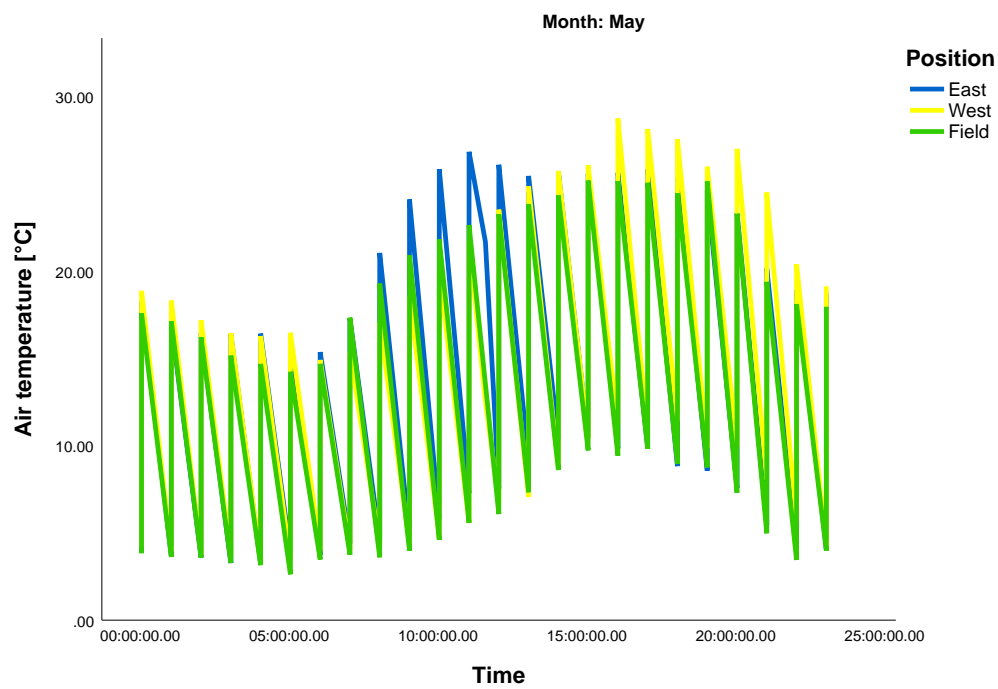

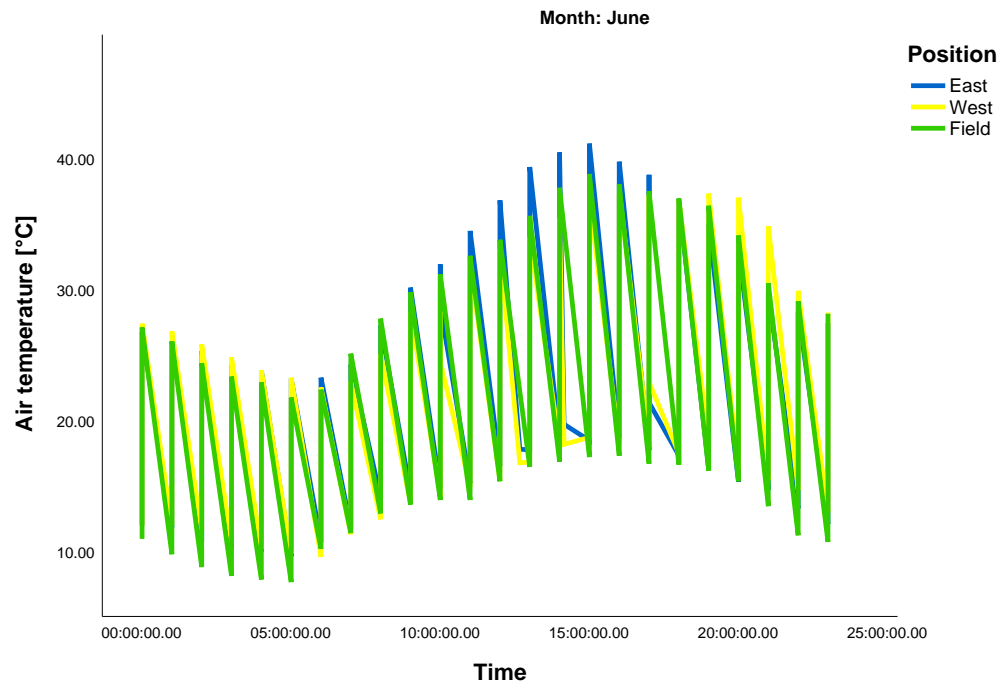

GGraph  
! Field = PAR W/m<sup>2</sup>  
Weather station = Radiation W/m<sup>2</sup>

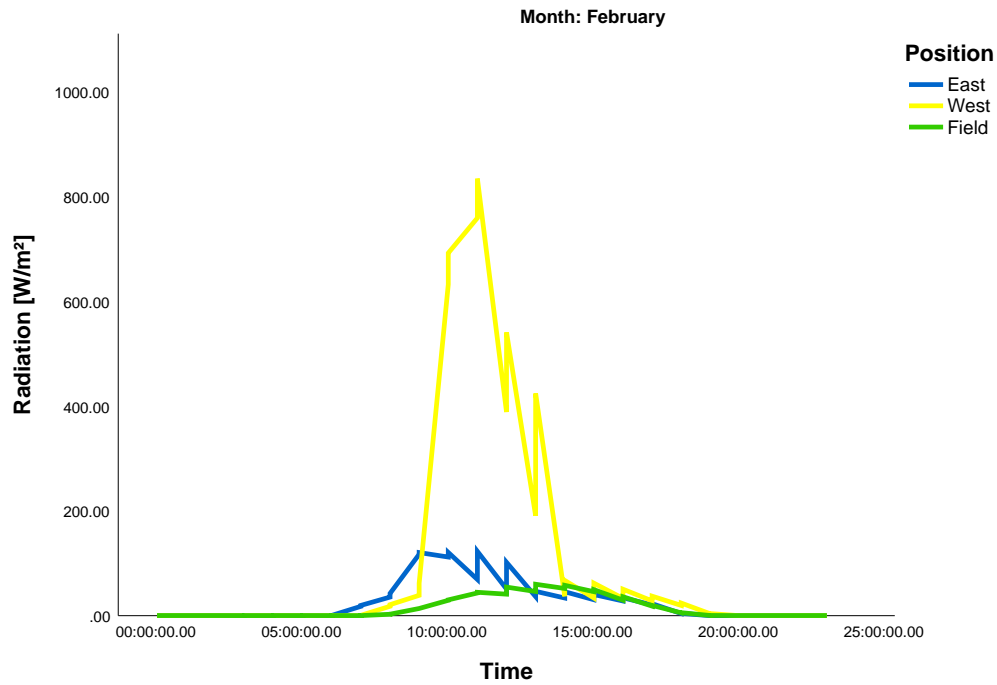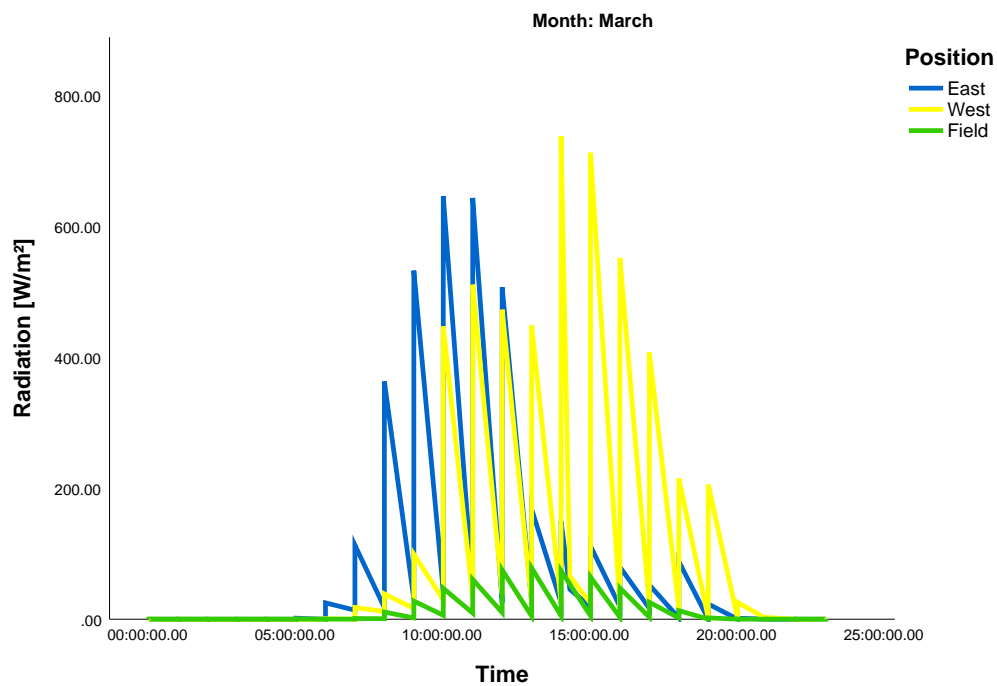

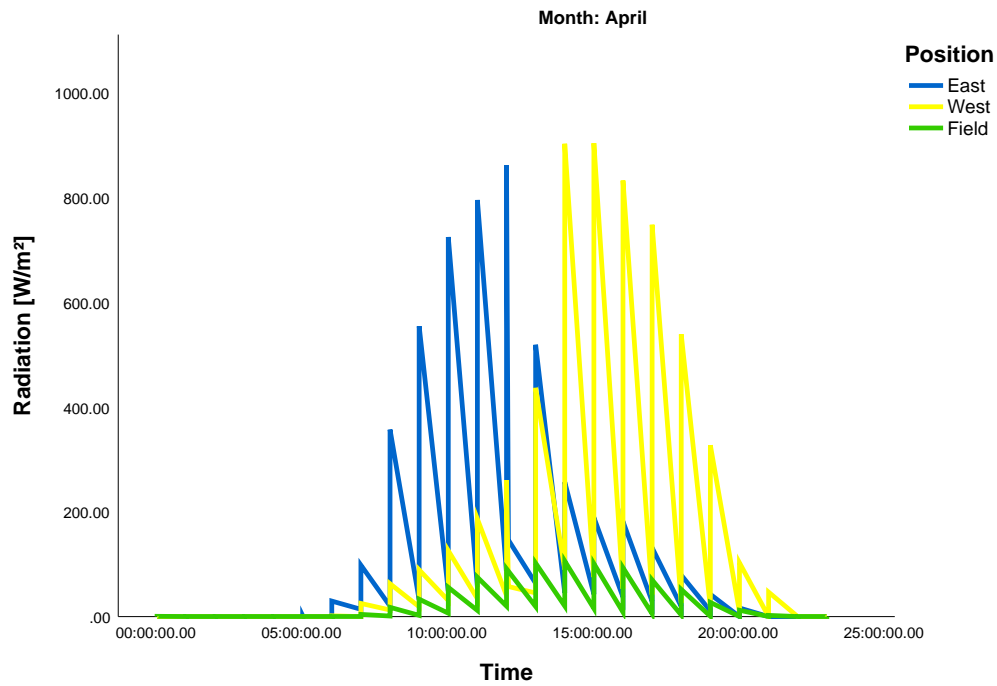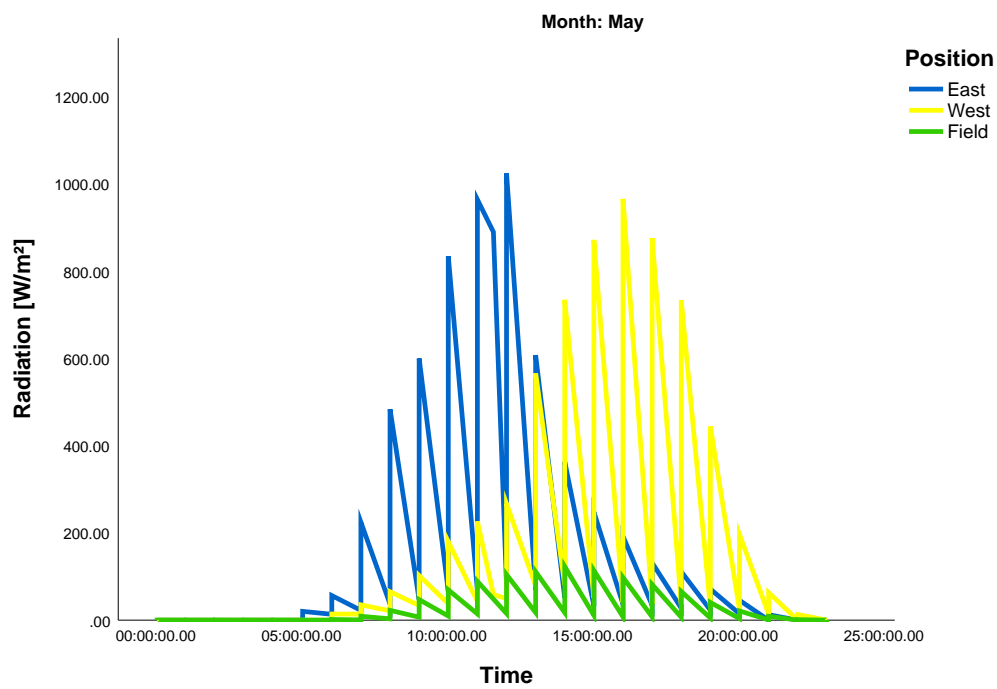

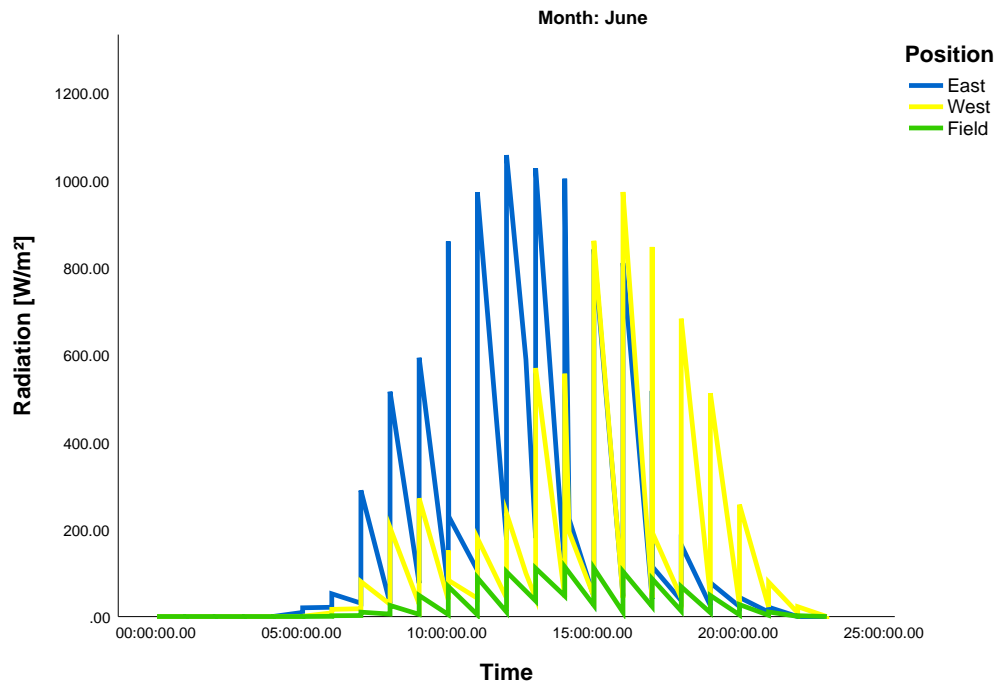

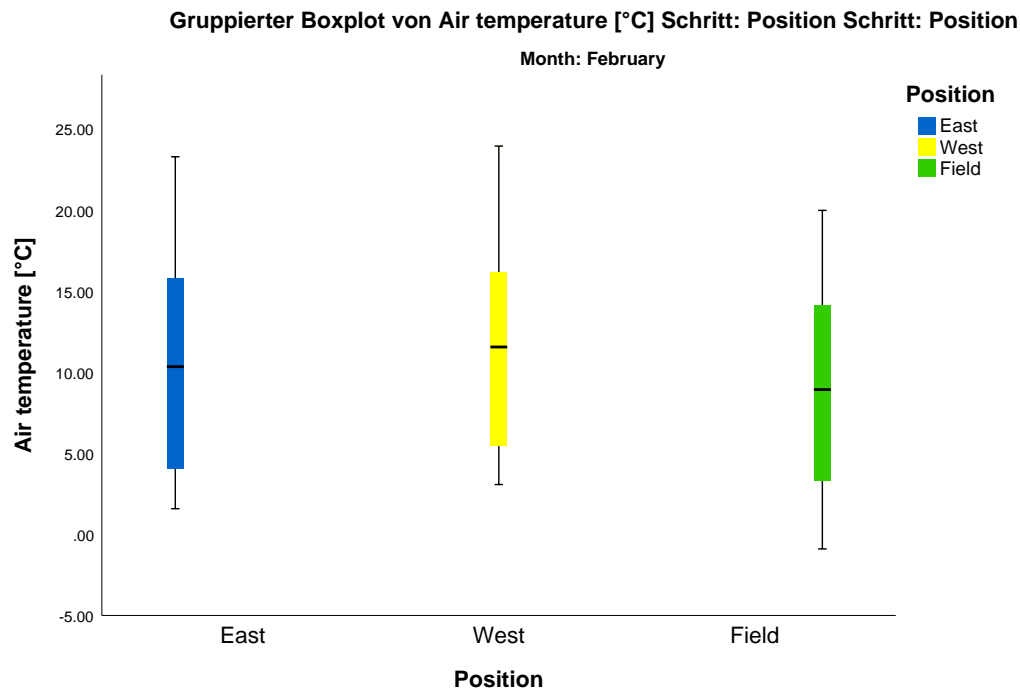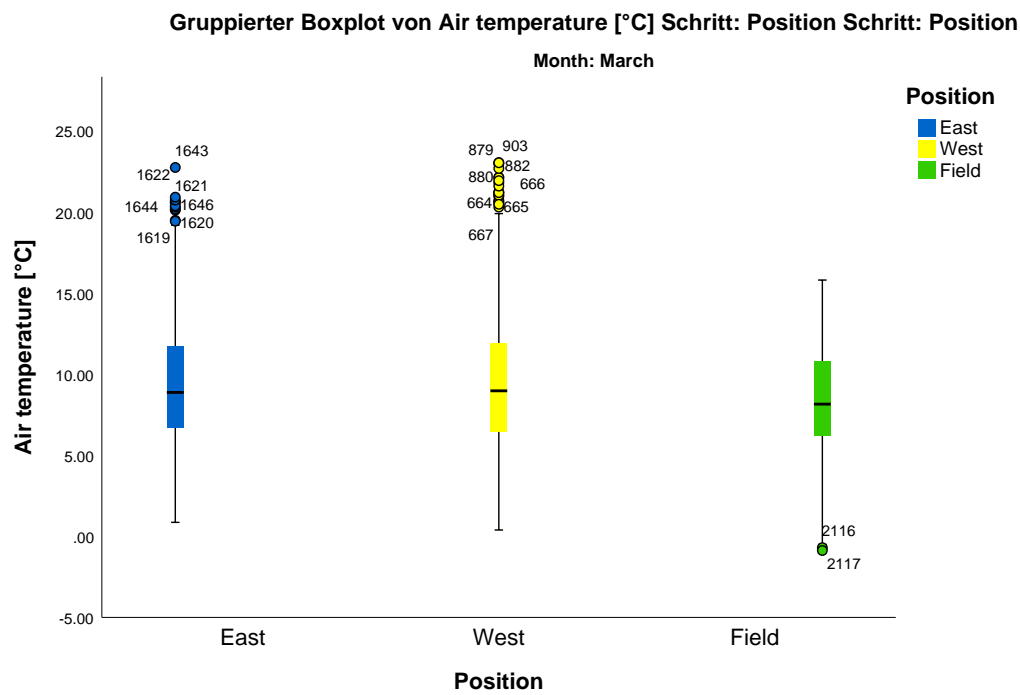

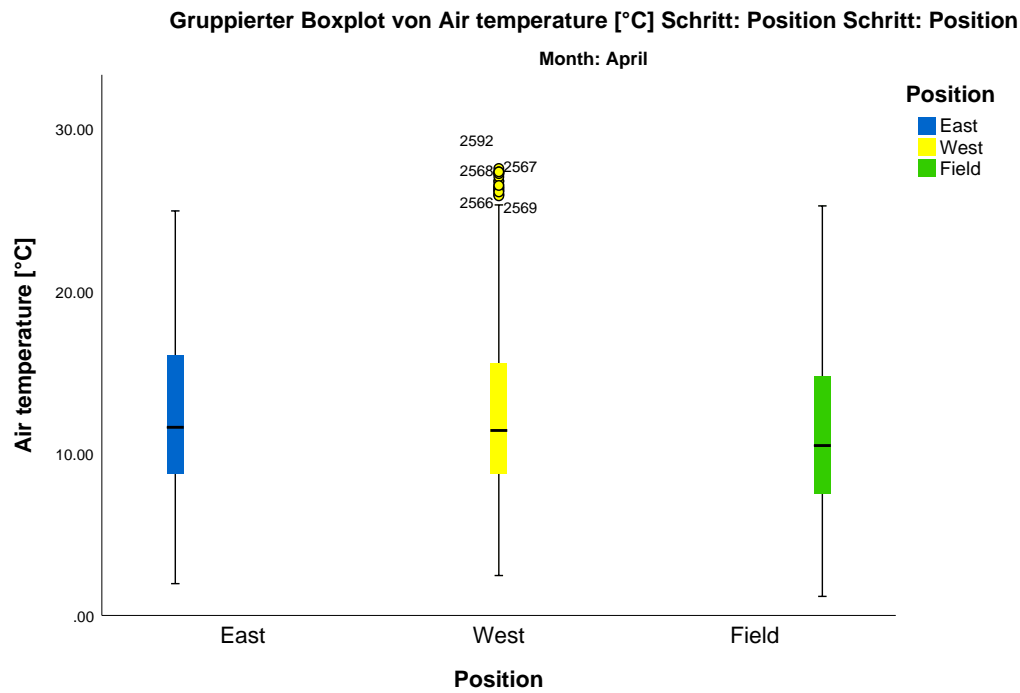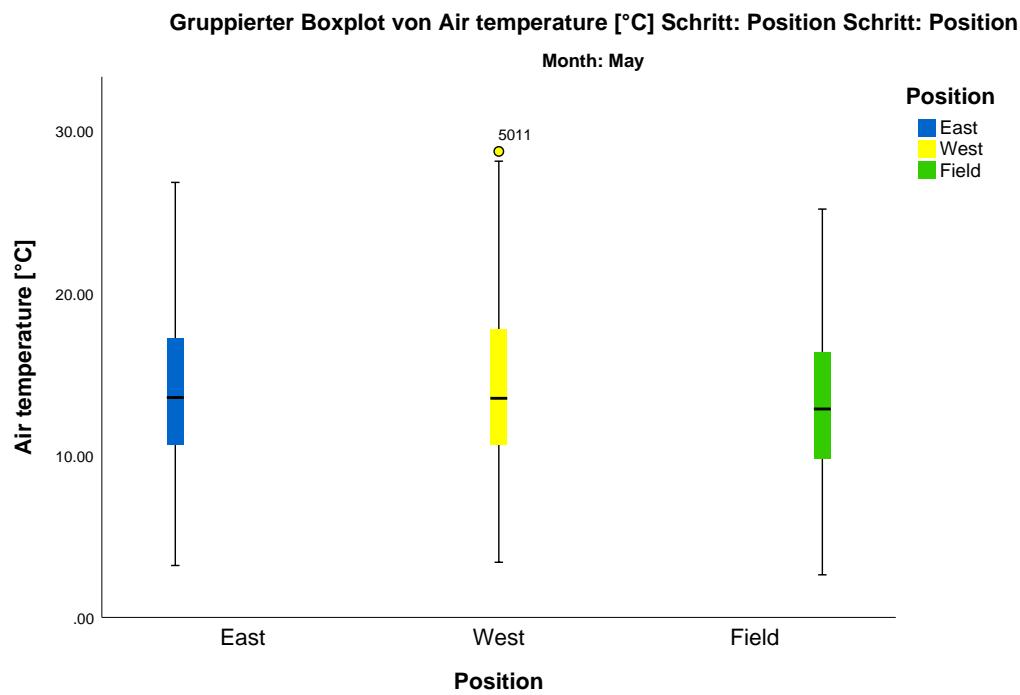



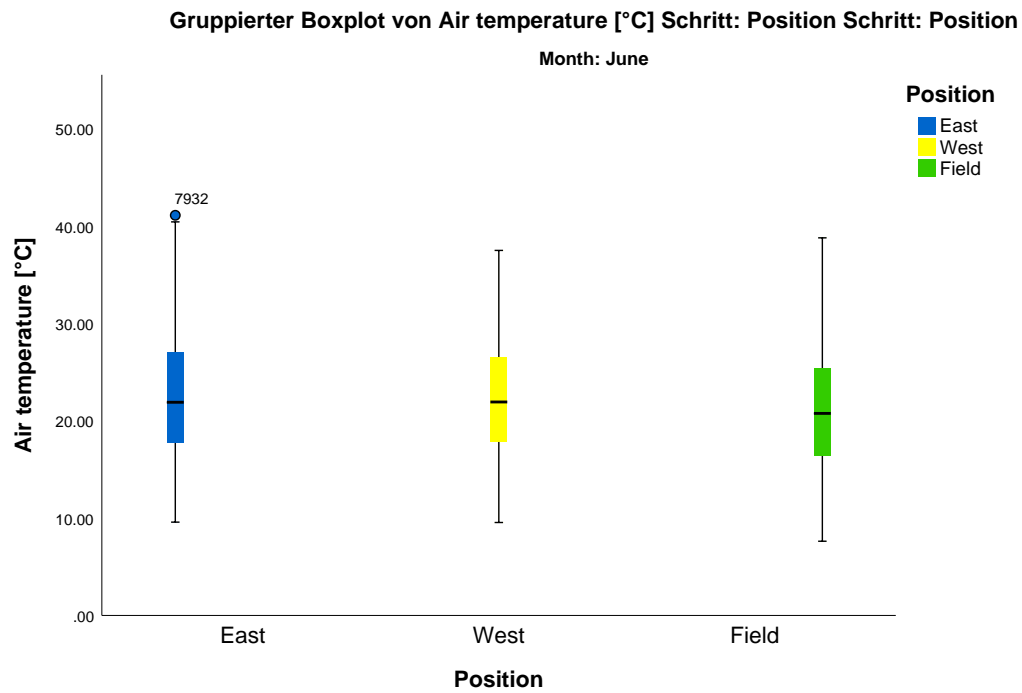

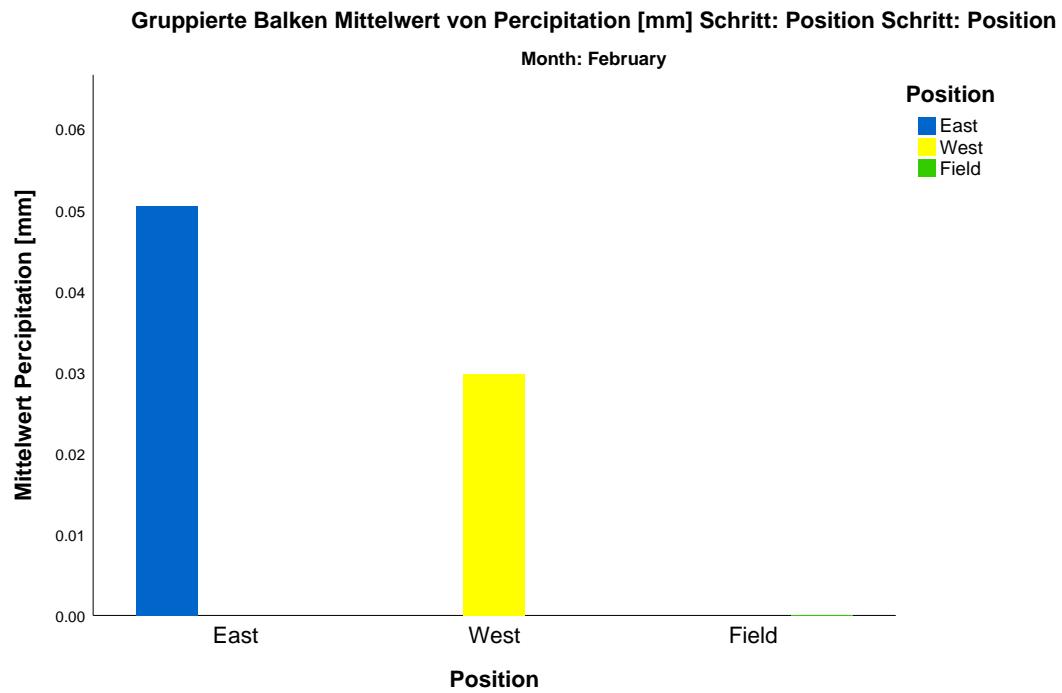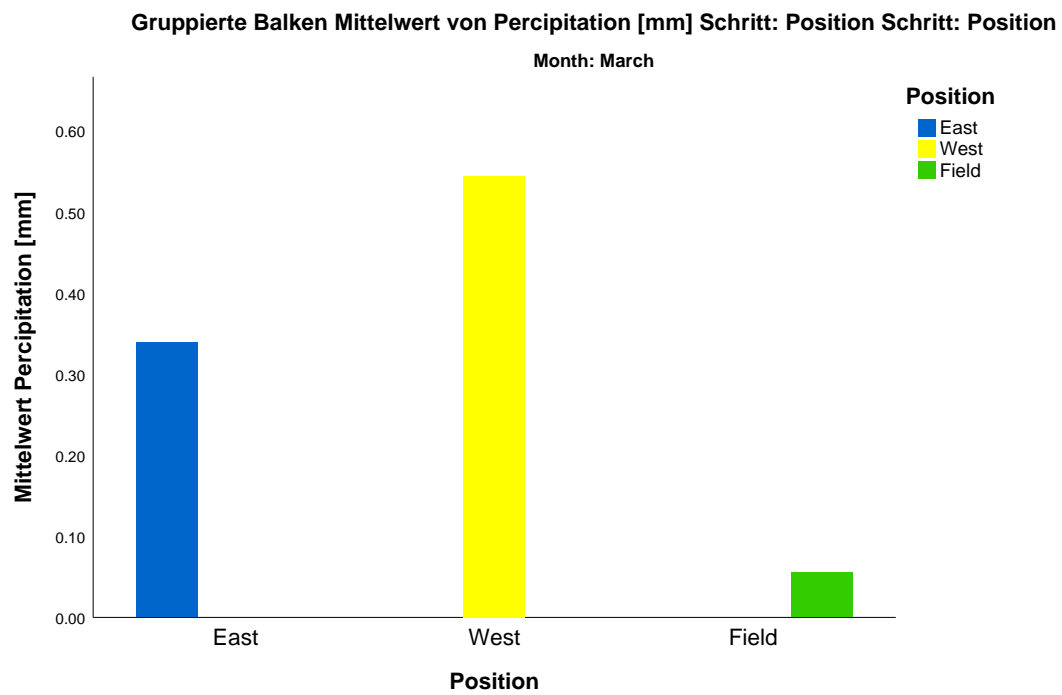

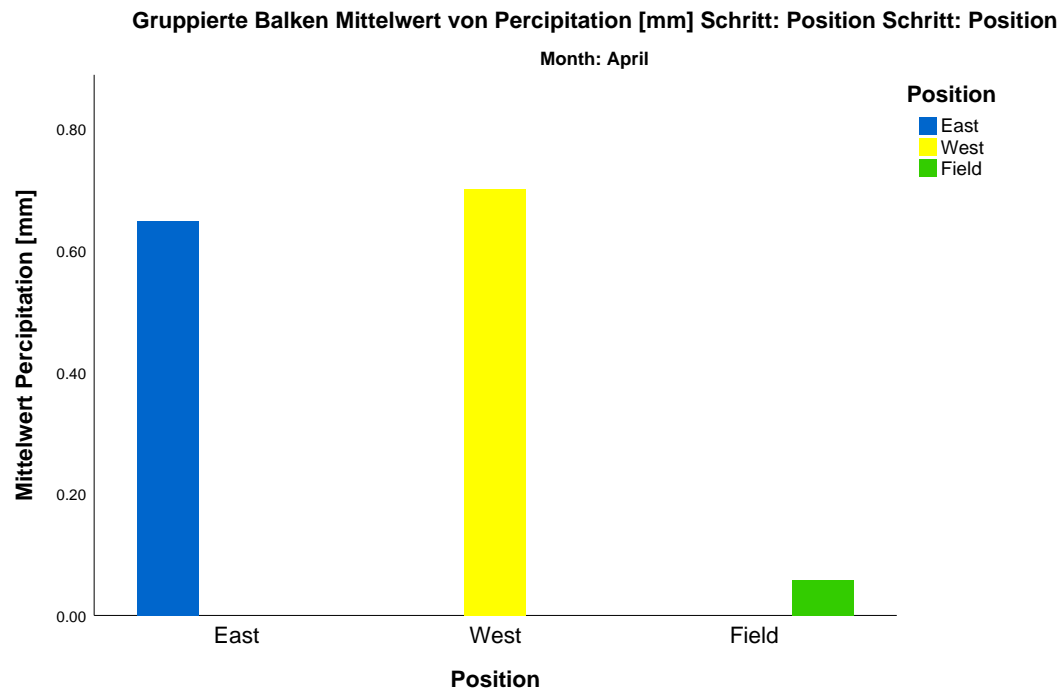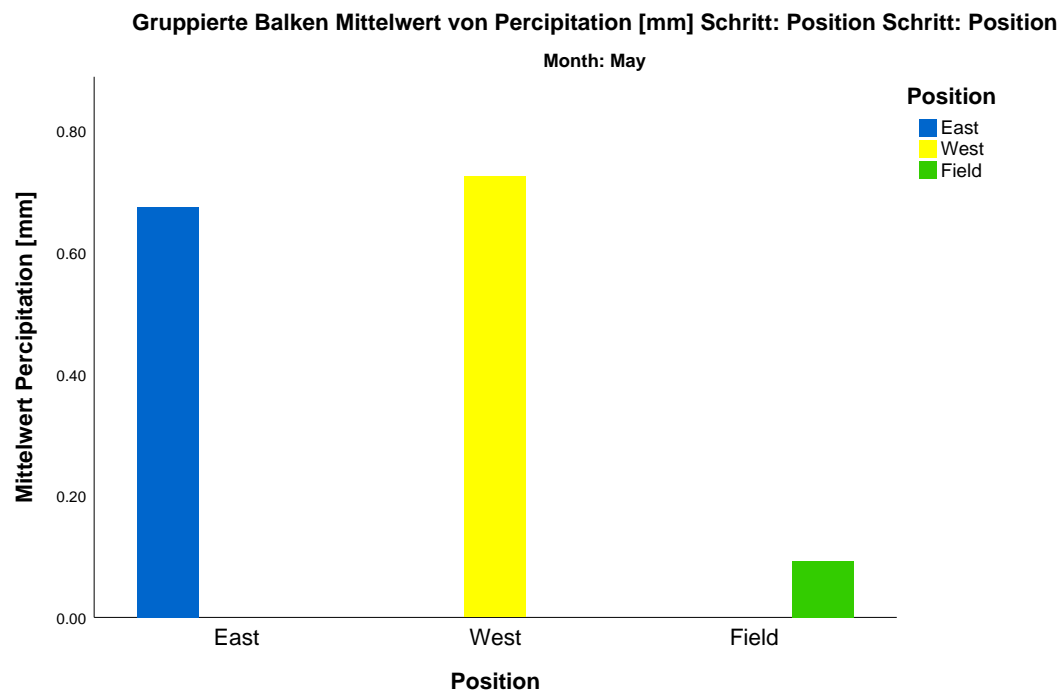

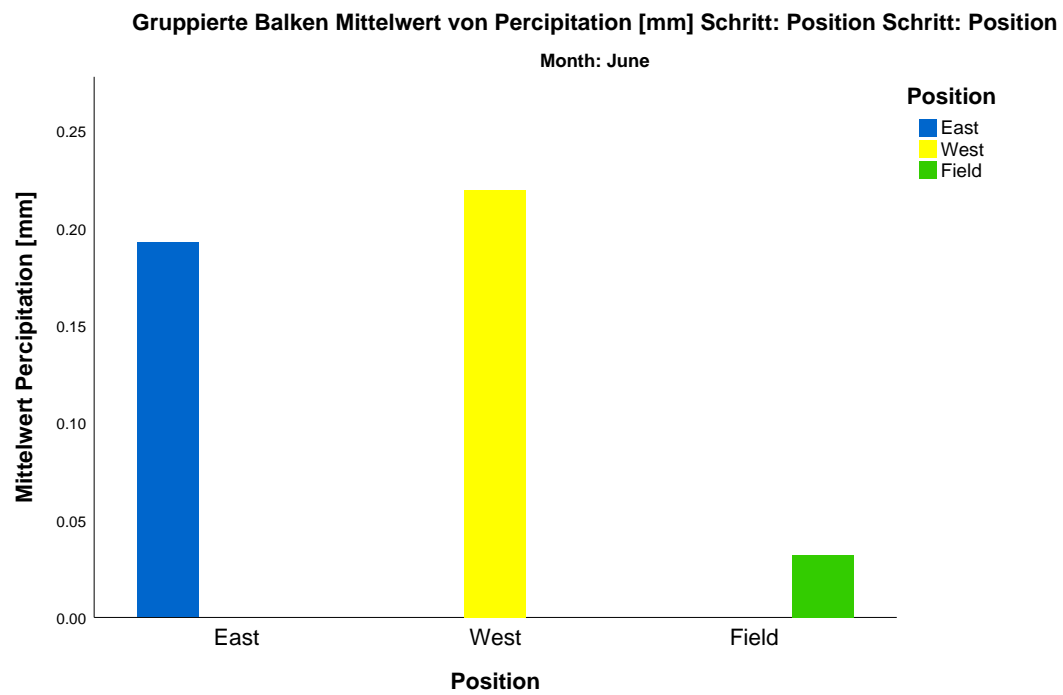

Supplement: Supplementary file 1 [file supplementary]
